# Supplementary material for: Design, synthesis, and biological evaluation of novel bioactive thalidomide analogs as anticancer immunomodulatory agents
Source: Royal Society of Chemistry journal article supplement (doi:10.1039/d2ra06188k), 2022-01-01
Supplement: d2ra06188k1.pdf [file d2ra06188k1.pdf]

**Design, synthesis, and biological evaluation of novel bioactive thalidomide analogs as anticancer immunomodulatory agents**

Anas Ramadan Kotb<sup>a</sup>, Dina A. Bakhotmah<sup>b\*</sup>, Abdallah E. Abdallah<sup>a</sup>, Hazem Elkady<sup>a</sup>, Mohammed S. Taghour<sup>a</sup>, Ibrahim. H. Eissa<sup>a</sup>, Mohamed Ayman El-Zahabi<sup>a\*</sup>

<sup>a</sup> Pharmaceutical Medicinal Chemistry & Drug Design Department, Faculty of Pharmacy (Boys), Al-Azhar University, Cairo, 11884, Egypt

<sup>b</sup> Department of Chemistry, Faculty of Science, King Abdulaziz University, Jeddah, Saudi Arabia.

**\* Corresponding author:**

**Mohamed Ayman El-Zahabi**

Pharmaceutical Medicinal Chemistry & Drug Design Department, Faculty of Pharmacy (Boys), Al-Azhar University, Cairo, 11884, Egypt

**Email:** [malzahaby@azhar.edu.eg](mailto:malzahaby@azhar.edu.eg)

**Ibrahim. H. Eissa**

Pharmaceutical Medicinal Chemistry & Drug Design Department, Faculty of Pharmacy (Boys), Al-Azhar University, Cairo, 11884, Egypt

**Email:** [Ibrahimeissa@azhar.edu.eg](mailto:Ibrahimeissa@azhar.edu.eg)

**Dina A. Bakhotmah**

Department of Chemistry, Faculty of Science, King Abdulaziz University, Jeddah, kingdom of Saudi Arabia.

**Email:** [dbakhotmah@kau.edu.sa](mailto:dbakhotmah@kau.edu.sa)

## Content

|          |                                                                                                                                                                                                                                                                                                                              |
|----------|------------------------------------------------------------------------------------------------------------------------------------------------------------------------------------------------------------------------------------------------------------------------------------------------------------------------------|
| <b>1</b> | <b>Biological testing</b> <ul style="list-style-type: none"><li>✓ <i>In vitro</i> anti-proliferative activity.</li><li>✓ Estimation of TNF-<math>\alpha</math>, CASP8, and VEGF in HepG-2 cells supernatant</li><li>✓ Estimation of nuclear factor kappa-B P65 (NF-<math>\kappa</math>B P65) in HepG-2 cell lysate</li></ul> |
| <b>2</b> | <b><i>In silico</i> studies</b> <ul style="list-style-type: none"><li>✓ Pharmacokinetic profiling study</li><li>✓ ADMET studies</li><li>✓ Toxicity studies</li></ul>                                                                                                                                                         |
| <b>3</b> | <b>Chemistry and materials</b>                                                                                                                                                                                                                                                                                               |
| <b>4</b> | <b>Spectral and elemental analysis</b>                                                                                                                                                                                                                                                                                       |
| <b>5</b> | <b>Toxicity report</b>                                                                                                                                                                                                                                                                                                       |

## **1- Biological testing**

### **a- *In vitro* anti-proliferative activities**

Anti-proliferative activity screening of the synthesized compounds was performed against three human cancer cell lines: hepatocellular carcinoma (HepG-2), prostate cancer (PC3), and mammary gland cancer (MCF-7), using MTT assay as follows: The cells were cultured in RPMI-1640 medium with 10% fetal bovine serum. Penicillin (100 units/ml) and streptomycin (100 µg/ml) were added at 37 °C in a 5% CO<sub>2</sub> incubator. The cells were seeded in a 96-well plate at a density of  $1.0 \times 10^4$  cells/well. at 37 °C for 48 h under 5% CO<sub>2</sub>. After incubation the cells were treated with different concentration of the synthesized compounds and incubated for 24 h. Then, 20 µl of MTT solution of a concentration of 5mg/ml was added and incubated for 4 h. DMSO (100 µl) was added into each well to dissolve the formed purple formazan. The color intensity was measured and recorded at absorbance of 570 nm using a plate reader (EXL 800, USA). The percentage of cell viability in was calculated as (A<sub>570</sub> of treated samples/A<sub>570</sub> of untreated sample) X 100.

### **b- Supernatant preparation**

Cell culture supernatants were prepared from HepG-2 cell line. Cells were cultured in RPMI 1640 medium supplemented with 10% heat-inactivated fetal bovine serum (FBS) having 100 U/ml of penicillin and 50 µg/ml of streptomycin at 37°C in a humidified 5% CO<sub>2</sub>/air mixture. The candidate compounds and thalidomide were dissolved in DMSO as a stock solution at 100 mmol/L and diluted with an FBS-free medium to achieve the designated concentrations (10 µM). The same concentration of DMSO without any compounds was used as a control. The HepG-2 cells were cultured onto 6-well plates (1x10<sup>6</sup> cells/ well), allowed to adhere for 24 h followed by treatment with the tested compounds. After 72 h, the media was collected and centrifuged for 15 min at 5000 rpm and equal volume of cell culture supernatants were collected and utilized for immunoassay using different kits.

### **c- Estimation of TNF-α, CASP8, and VEGF in HepG-2 supernatant**

The levels of TNF-α, CASP8, and VEGF in cell culture supernatants were estimated by ELISA technique using commercially available matched paired antibodies (R&D Systems Inc., Minneapolis, MN) according to reported procedure.

#### **d- Cell lysate preparation**

The tested compounds and thalidomide were incubated for 72 h with HepG-2 cells. Then, the cells were treated with trypsin/EDTA solution (0.25 mM trypsin and 1 mM EDTA dissolved in a phosphate buffer). Cell lysate were washed three times with phosphate buffer saline (PBS, Sigma Chemical Company, St. Louis, MO, USA) and lysed by three repetitive freezing/thawing cycles (thawing at 37 °C for 2 min and freezing at –80°C for 15 min), followed by homogenization of the cells by passing through a 20G needle.

#### **e- Estimation of nuclear factor kappa-B P65 (NF-κB P65) in HepG-2 cell lysate**

The cell lysate samples were applied to the microtiter plates in a concentration of 50 µL/well. The plates were incubated at 37°C for 1 h, then kept at 4°C for 12 h in a humidified chamber. Next, the cell lysate was extracted from the wells and the plates were washed three times with a buffer (PBS/0.05% Tween-20). Blocking buffer (PBS/0.05% Tween-20/5% FBS) (200 µL) was added to each well and incubated at 37 °C for 1.5 h then washed. Anti-rabbit NF-κB P65 polyclonal antibody was dispensed as 50 µL/well and incubated for 2 h at 37 °C. The plates were washed and incubated for 1 h with 50 µL/well of diluted polyclonal goat anti-rabbit-peroxidase conjugate (1:1000). After that, the plates were washed four times followed by addition of TMB and H<sub>2</sub>O<sub>2</sub> in equal volume (50 µL/well). After the development of color, 50 µL of stopping buffer (1 M HCl) were added per well. The absorbance was measured at 450 nm using the ELISA plate reader (FLUOstar OPTIMA)

## **2- *In silico* studies**

### **1- Pharmacokinetic profiling study**

To identify potential drug candidates, drug-likeness profiles were developed for the preliminary estimation of the physicochemical, drug-like parameters, and pharmacokinetics using Discovery studio 4.0 utilizing Lipinski's and Veber's rules. Lipinski suggested that the absorption of an orally administered compound is more likely to be better if the molecule satisfies at least three out of four of the following rules: (1) H bond donors (OH, NH, and SH) ≤ 5; (2) H bond acceptors (N, O, and S atoms) ≤ 10; (3) molecular weight < 500; (4) logP < 5. Compounds violating more than one of these rules could not have good bioavailability. Moreover, reduced molecular flexibility, as

measured by the number of rotatable bonds, and low polar surface area is found to be an important predictors of good oral bioavailability. Compounds that meet the criteria of 10 or fewer rotatable bonds and polar surface area equal to or less than 140 Å will have a high probability of good oral bioavailability.

## **2- ADMET studies**

ADMET descriptors (absorption, distribution, metabolism, excretion and toxicity) of the synthesized compounds were determined using Discovery studio 4.0. At first, the CHARMM force field was applied then the compounds were prepared and minimized according to the preparation of small molecule protocol. Then ADMET descriptors protocol was applied to carry out these studies.

## **3- Toxicity studies**

The toxicity parameters of the synthesized compounds were calculated using Discovery studio 4.0. Sorafenib was used as a reference drug. At first, the CHARMM force field was applied then the compounds were prepared and minimized according to the preparation of small molecule protocol. Then different parameters were calculated from toxicity prediction (extensible) protocol.

## **4- Chemistry and materials**

All solvents and reagents were commercially available and used without further purification. Progress of reactions was monitored by TLC using TLC sheets coated with UV fluorescent silica gel (Kieselgel 0.25mm, 60 F254, Merck Germany) with a developing solvent system of DCM/methanol (95:5) and was visualized using UV lamp. The melting points were determined using a Gallen lamp melting point apparatus. Elemental analyses were accomplished using a CHN analyzer. The infrared spectra were recorded on FT/IR-6600typeA spectrophotometer. <sup>1</sup>H NMR spectra were recorded at 400 and 700 MHz, while <sup>13</sup>C NMR spectra were run at 100 and 176 MHz, on a Bruker Avance NEO-600 equipped with a 1.7 mm TCI CryoProbe. Chemical shifts were expressed in δ (ppm) with reference to TMS and coupling constant (J) in Hertz using DMSO-d<sub>6</sub> and CDCl<sub>3</sub>-d<sub>6</sub> as solvents. The mass spectra were recorded on an Agilent 6410 triple-quadrupole mass spectrometer equipped with an ESI source.

## **5- Spectral and elemental analysis**

| Lab code | Compound No. |
|----------|--------------|
| AR-7     | 6            |
| AR-8     | 7a           |
| AR-9     | 7b           |
| AR-10    | 24b          |
| AR-11    | 24a          |
| AR-12    | 24c          |
| AR-13    | 13a          |
| AR-14    | 15a          |
| AR-15    | 11a          |
| AR-17    | 19b          |
| AR-18    | 19a          |
| H2-1     | 13b          |
| H2-2     | 15b          |
| H2-3     | 11b          |

---

## **Viability assay against normal cell line**

### **MTT protocol**

#### **Determination of sample cytotoxicity on cells (MTT protocol)**

1-the 96 well tissue culture plate was inoculated with  $1 \times 10^5$  cells / ml (100 ul / well) and incubated at 37°C for 24 hours to develop a complete monolayer sheet.

2- Growth medium was decanted from 96 well micro titer plates after confluent sheet of cells were formed, cell monolayer was washed twice with wash media.

3- two-fold dilutions of tested sample was made in RPMI medium with 2% serum (maintenance medium).

4- 0.1 ml of each dilution was tested in different wells leaving 3 wells as control, receiving only maintenance medium.

5- Plate was incubated at 37°C and examined. Cells were checked for any physical signs of toxicity, e.g. partial or complete loss of the monolayer, rounding, shrinkage, or cell granulation.

6- MTT solution was prepared (5mg/ml in PBS) (BIO BASIC CANADA INC).

8- 20ul MTT solution were added to each well. Place on a shaking table, 150rpm for 5 minutes, to thoroughly mix the MTT into the media.

9) Incubate (37C, 5% CO<sub>2</sub>) for 4 hours to allow the MTT to be metabolized.

10) Dump off the media. (dry plate on paper towels to remove residue if necessary.

11) Resuspend formazan (MTT metabolic product) in 200ul DMSO. Place on a shaking table, 150rpm for 5 minutes, to thoroughly mix the formazan into the solvent.

12) Read optical density at 560nm and subtract background at 620nm. Optical density should be directly correlated with cell quantity.

### **Morphological assay**

❖ Large-scale, morphological changes that occur at the cell surface, or in the cytoskeleton, can be followed and related to cell viability.

❖ Damage can be identified by large decreases in volume secondary to losses in protein and intracellular ions of due to altered permeability to sodium or potassium.

❖ Necrotic cells: nuclear swelling, chromatin flocculation, loss of nuclear basophilia

❖ Apoptotic cells: cell shrinkage, nuclear condensation, nuclear fragmentation

| ID    | ug/ml | O.D       |           |           | Mean O.D     | ±SE          | Viability %     | Toxicity %      | IC50 ± SD        |
|-------|-------|-----------|-----------|-----------|--------------|--------------|-----------------|-----------------|------------------|
| vero  | ----- | 0.84<br>2 | 0.83<br>3 | 0.83      | 0.835        | 0.00360<br>6 | 100             | 0               | ug               |
| AR 9  | 1000  | 0.02<br>2 | 0.02<br>6 | 0.01<br>8 | 0.022        | 0.00230<br>9 | 2.63473053<br>9 | 97.3652694<br>6 | 163.61<br>± 1.12 |
|       | 500   | 0.05<br>3 | 0.05<br>8 | 0.06<br>2 | 0.05766<br>7 | 0.00260<br>3 | 6.90618762<br>5 | 93.0938123<br>8 |                  |
|       | 250   | 0.17<br>4 | 0.16<br>8 | 0.17<br>4 | 0.172        | 0.002        | 20.5988024      | 79.4011976      |                  |
|       | 125   | 0.43<br>5 | 0.45<br>1 | 0.43<br>9 | 0.44166<br>7 | 0.00480<br>7 | 52.8942115<br>8 | 47.1057884<br>2 |                  |
|       | 62.5  | 0.83<br>2 | 0.84      | 0.82<br>7 | 0.833        | 0.00378<br>6 | 99.7604790<br>4 | 0.23952095<br>8 |                  |
|       | 31.25 | 0.83<br>3 | 0.84<br>1 | 0.83<br>1 | 0.835        | 0.00305<br>5 | 100             | 0               |                  |
| AR 10 | 1000  | 0.01<br>9 | 0.02<br>1 | 0.01<br>9 | 0.01966<br>7 | 0.00066<br>7 | 2.35528942<br>1 | 97.6447105<br>8 | 161.12<br>± 1.42 |
|       | 500   | 0.03<br>2 | 0.03<br>5 | 0.05<br>2 | 0.03966<br>7 | 0.00622<br>7 | 4.75049900<br>2 | 95.249501       |                  |
|       | 250   | 0.21<br>4 | 0.22      | 0.19      | 0.208        | 0.00916<br>5 | 24.9101796<br>4 | 75.0898203<br>6 |                  |
|       | 125   | 0.43<br>6 | 0.43<br>6 | 0.44<br>7 | 0.43966<br>7 | 0.00366<br>7 | 52.6546906<br>2 | 47.3453093<br>8 |                  |
|       | 62.5  | 0.73<br>8 | 0.74<br>2 | 0.73      | 0.73666<br>7 | 0.00352<br>8 | 88.2235528<br>9 | 11.7764471<br>1 |                  |
|       | 31.25 | 0.82<br>8 | 0.84<br>1 | 0.83<br>2 | 0.83366<br>7 | 0.00384<br>4 | 99.8403193<br>6 | 0.15968063<br>9 |                  |

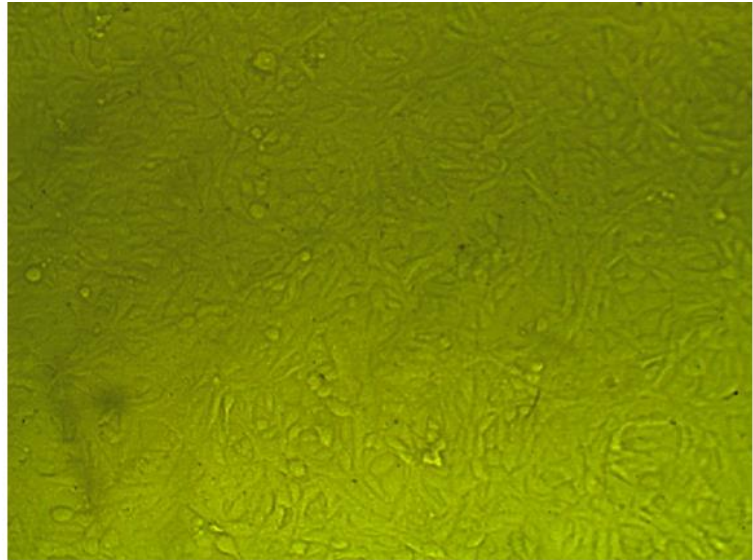

**control  
vero cells**

Organism : *Cercopithecus aethiops*  
Tissue : kidney  
Cell Type : epithelial  
Culture Properties : adherent  
Disease : normal  
ATCC : CCL-81

## Effect of sample AR 9 on vero cells at different concentration

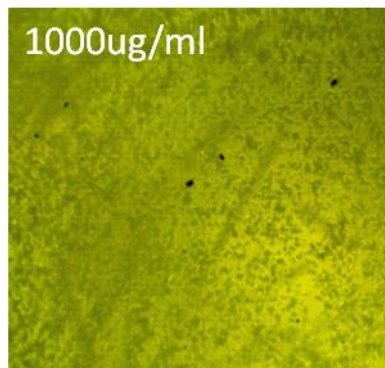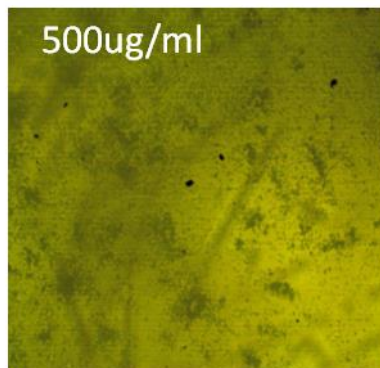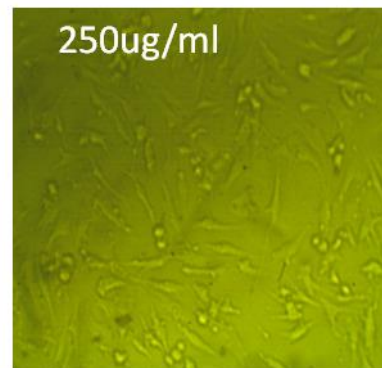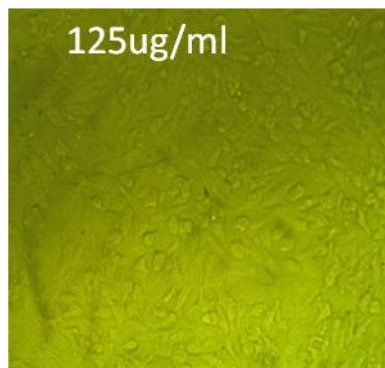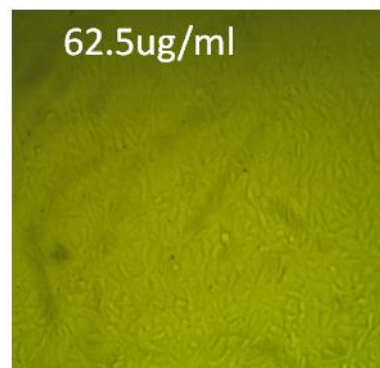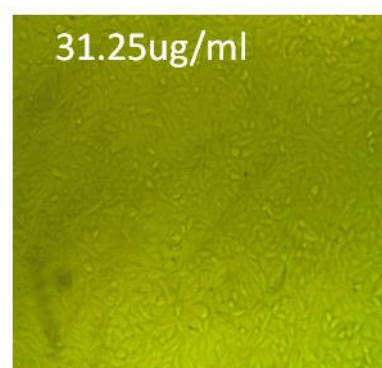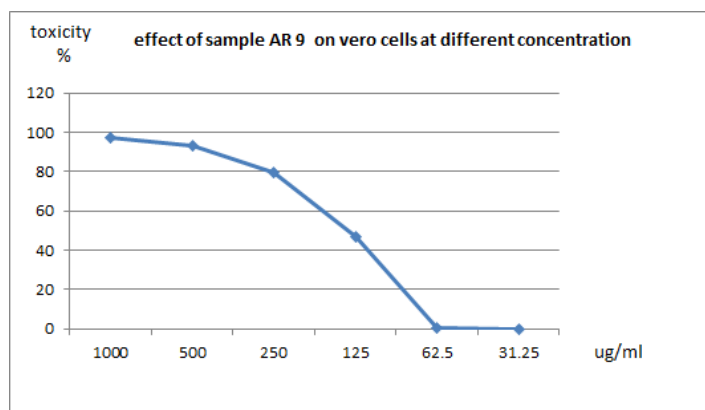

## Effect of sample AR 10 on vero cells at different concentration

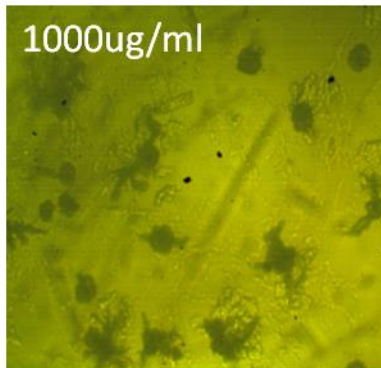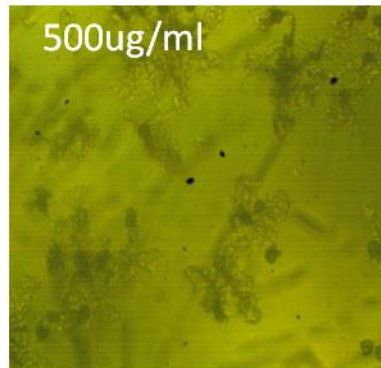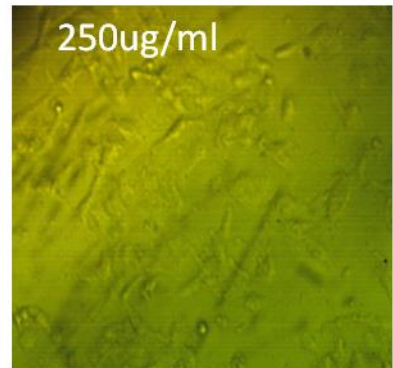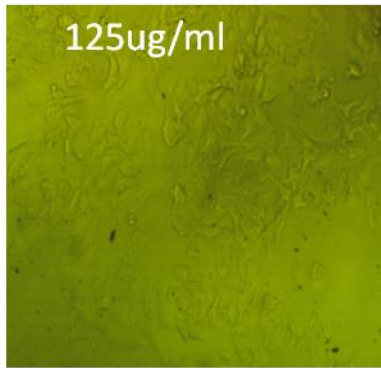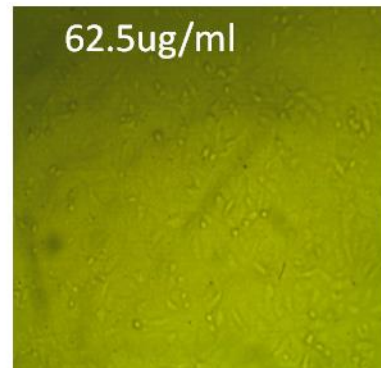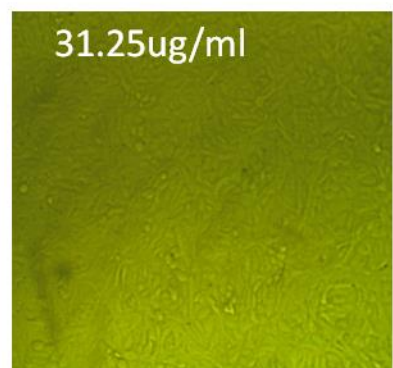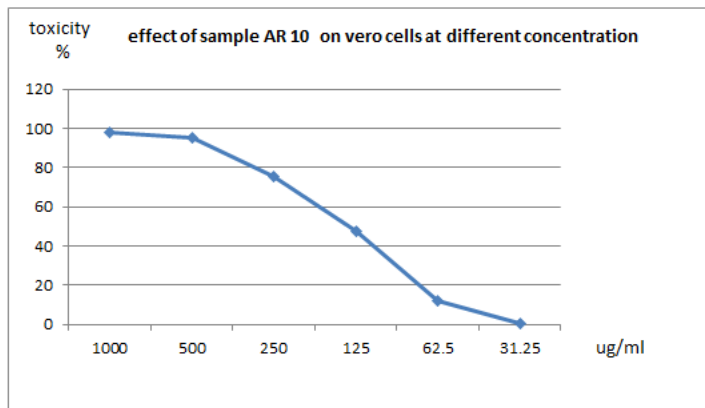

AR 7

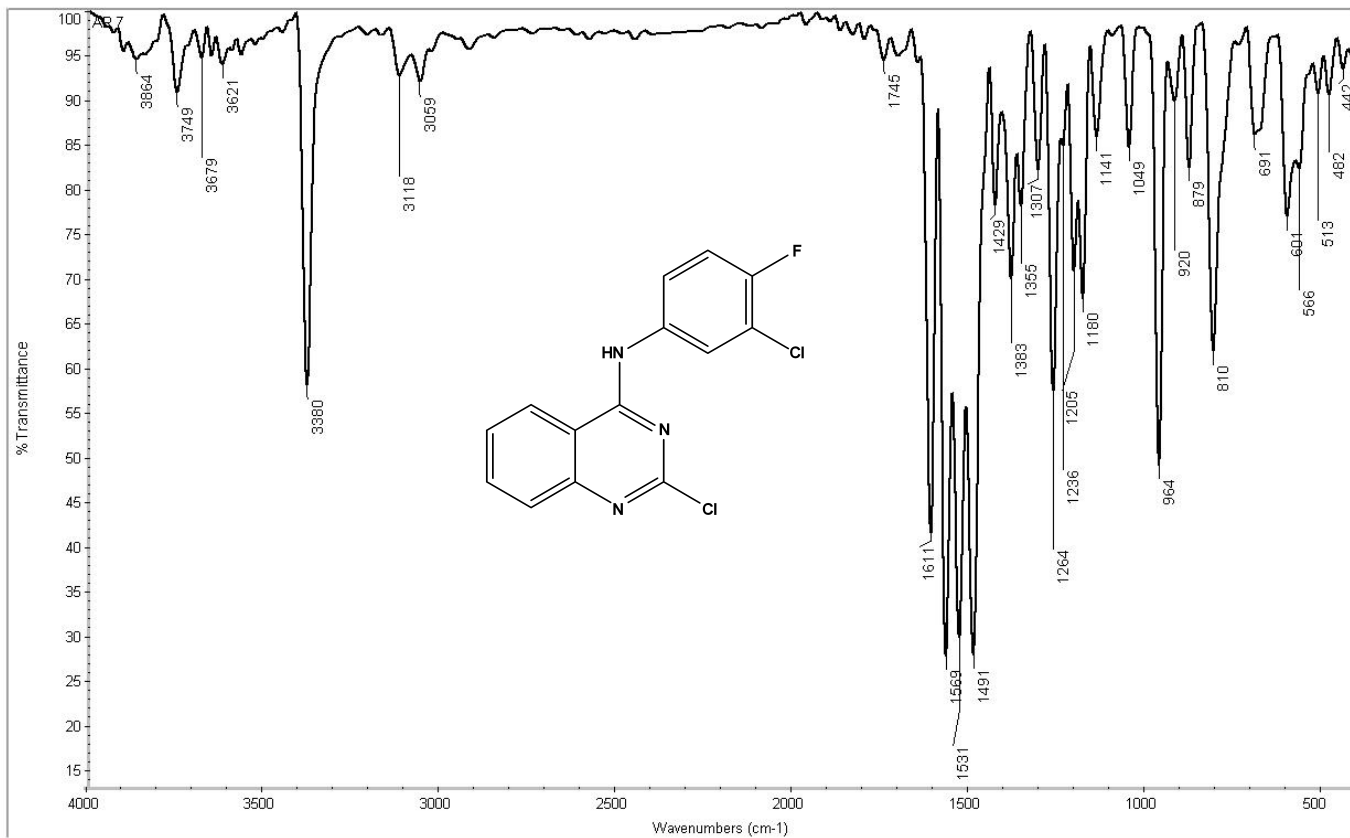

AR 8

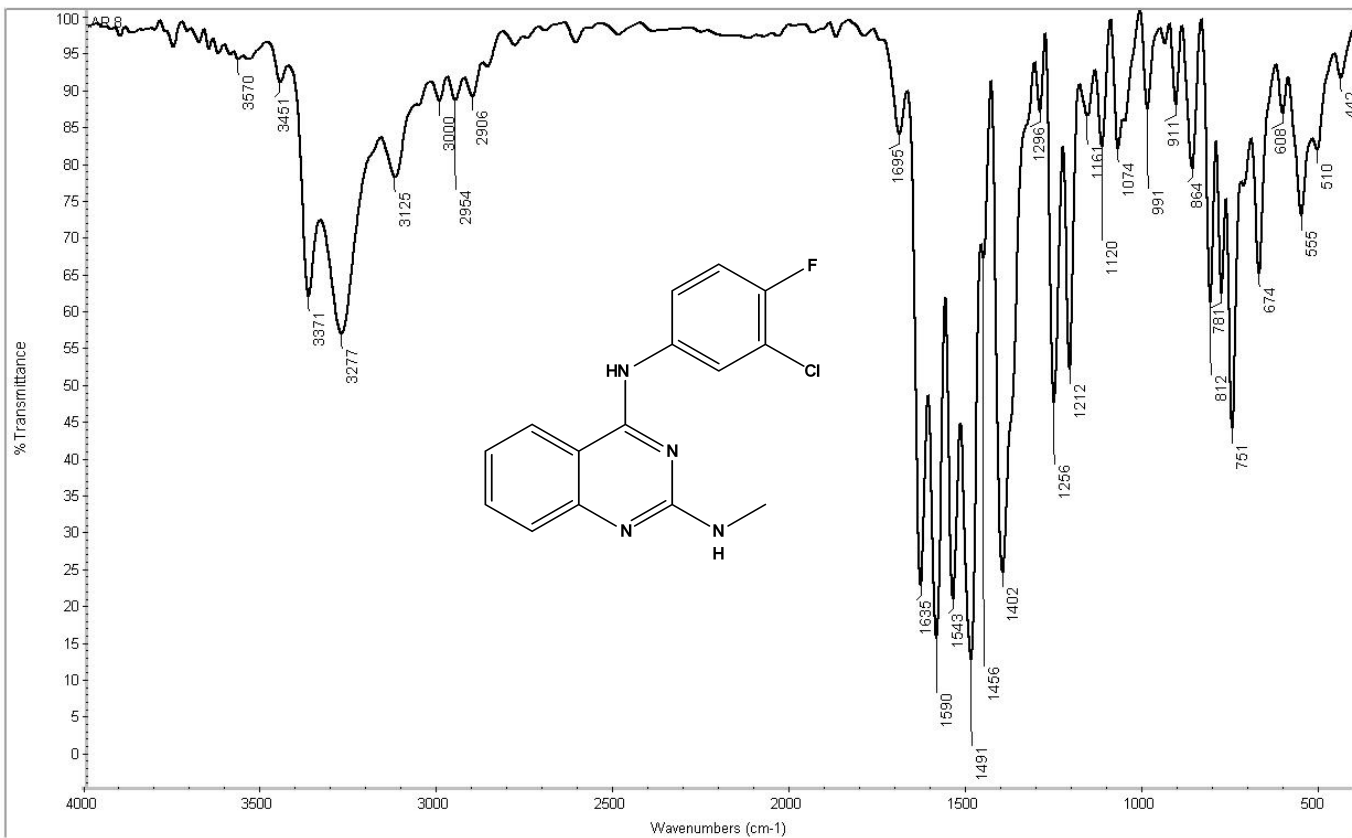

AR 9

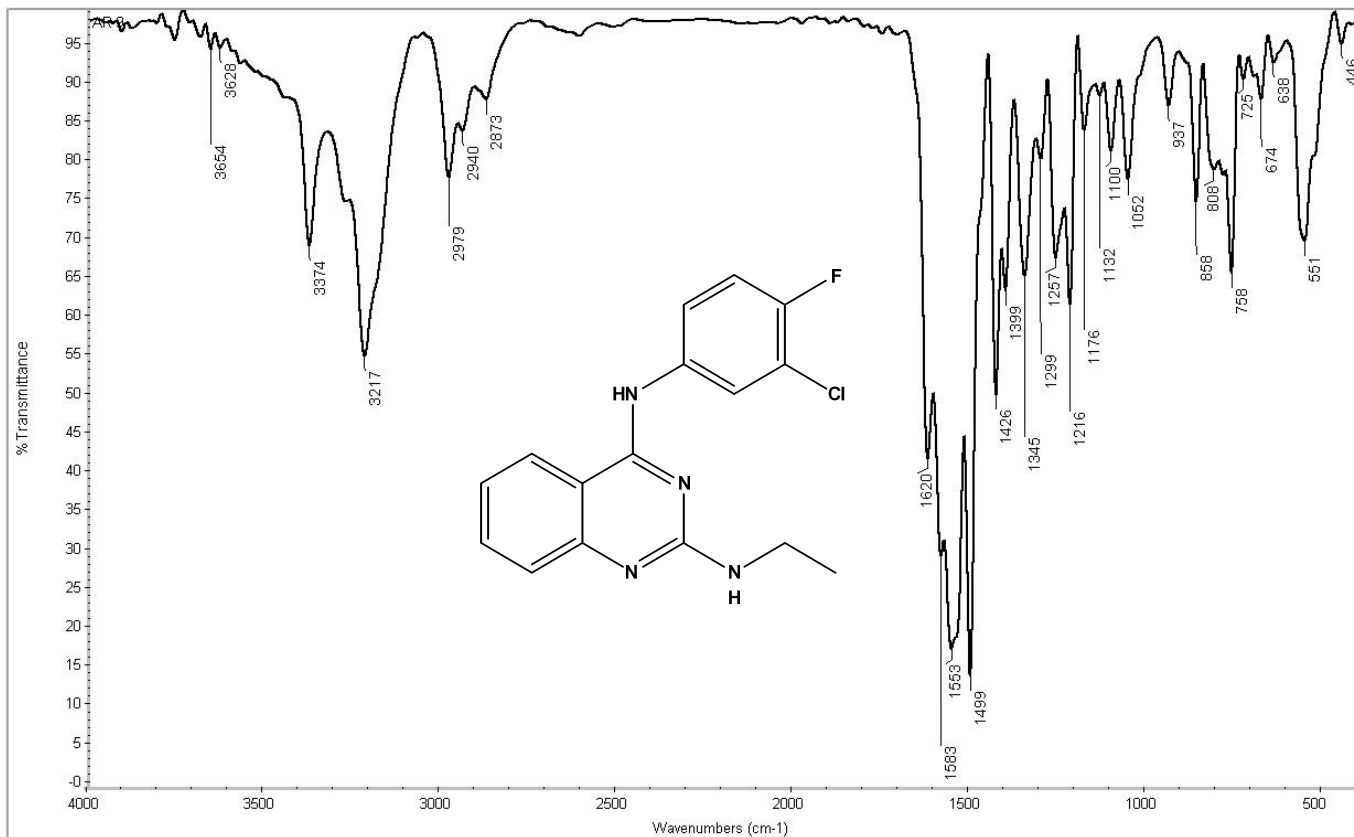

AR 15

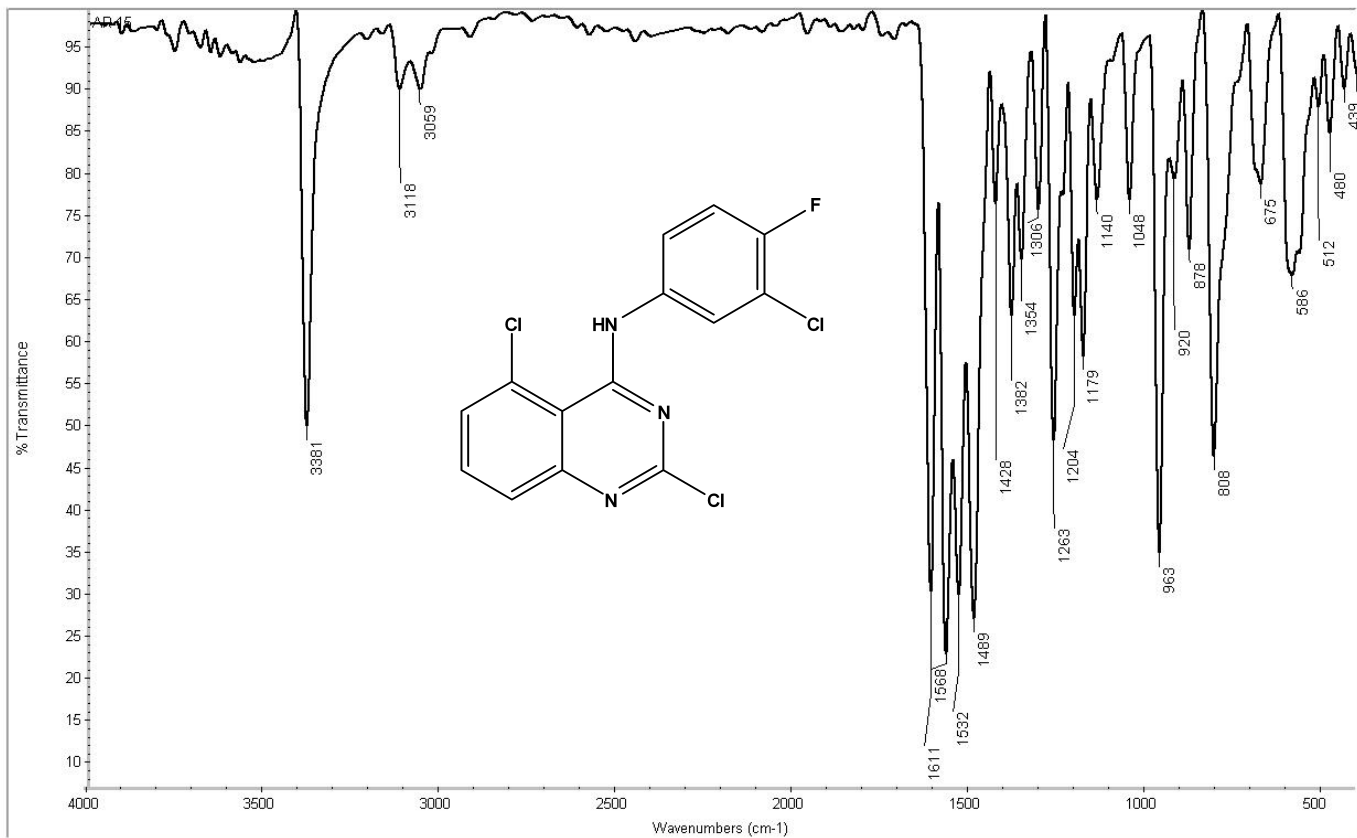

H2-3

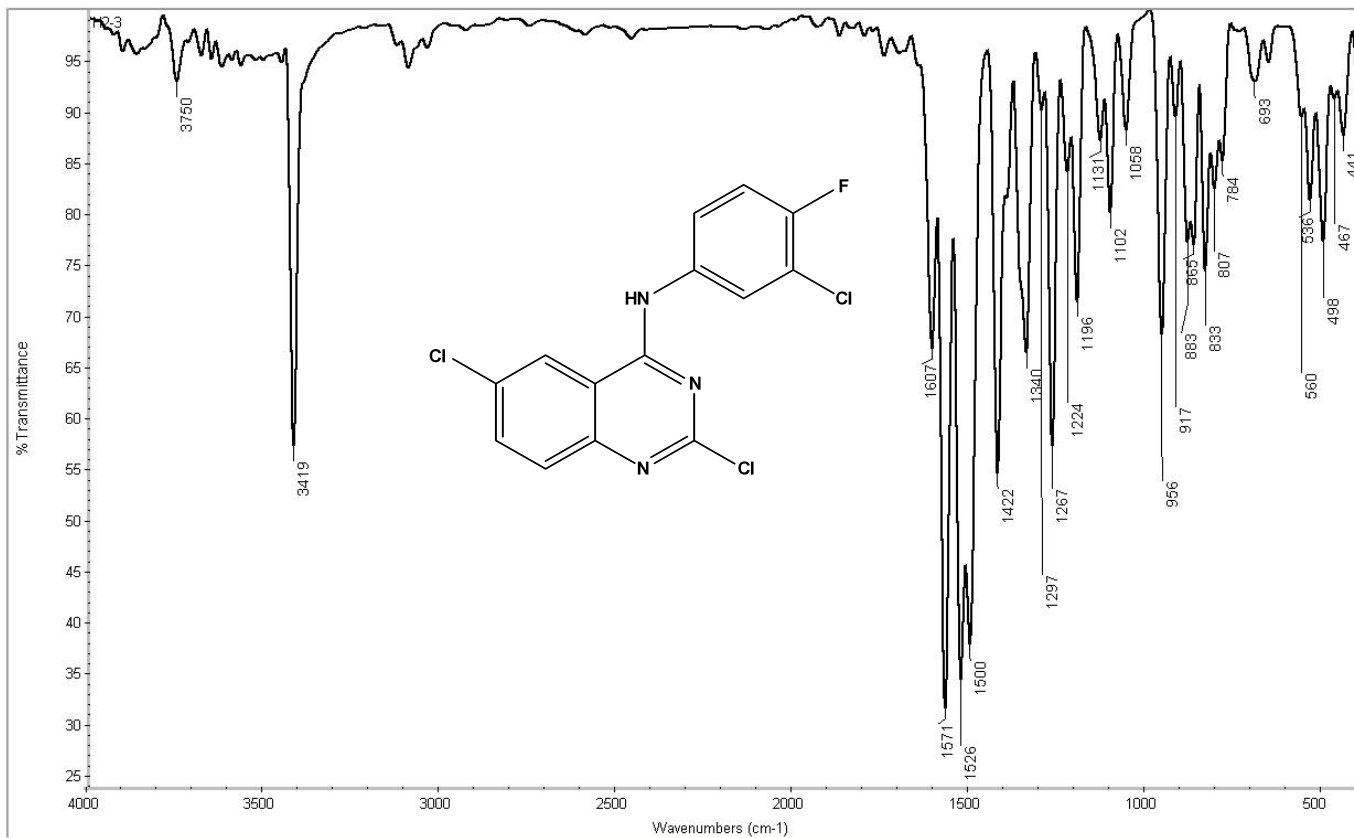

AR 13

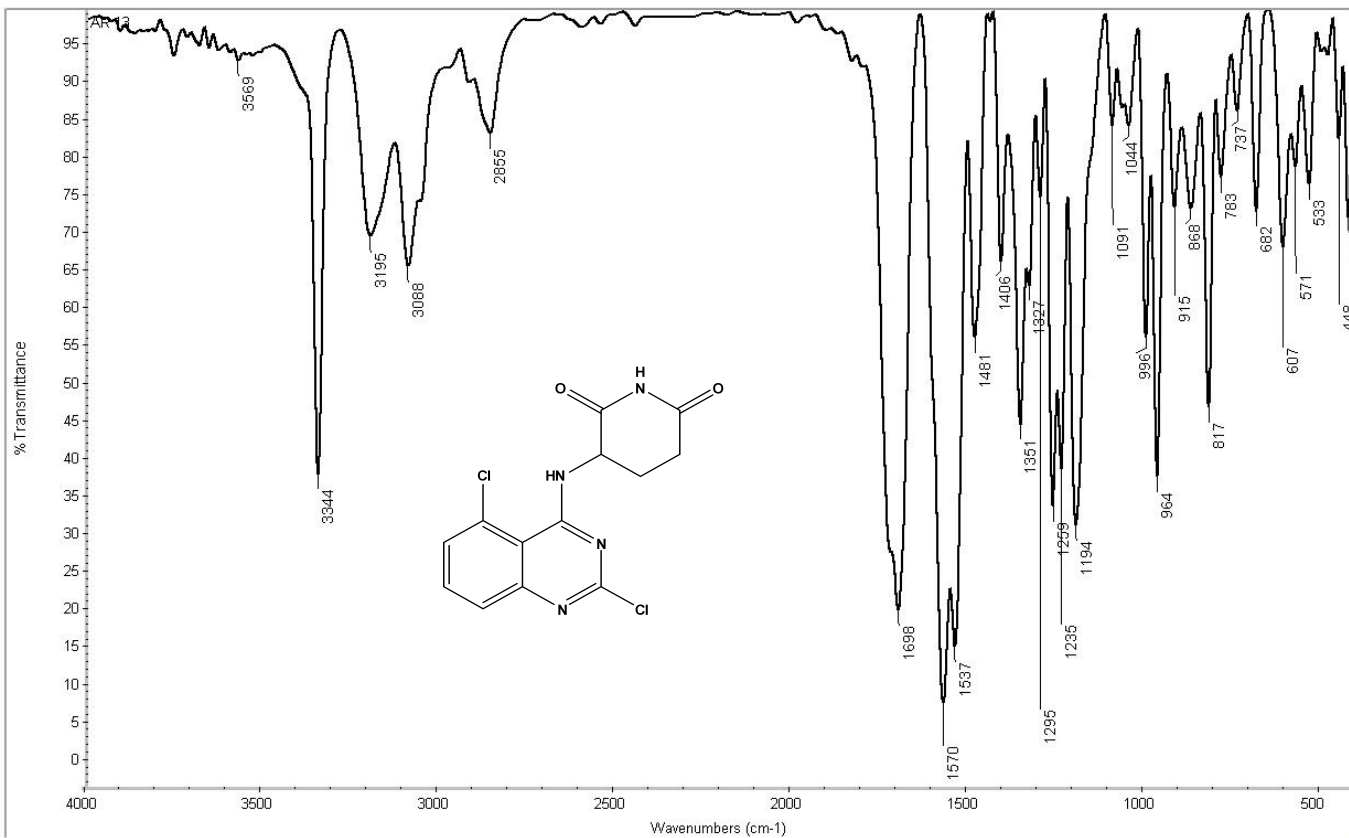

H2-1

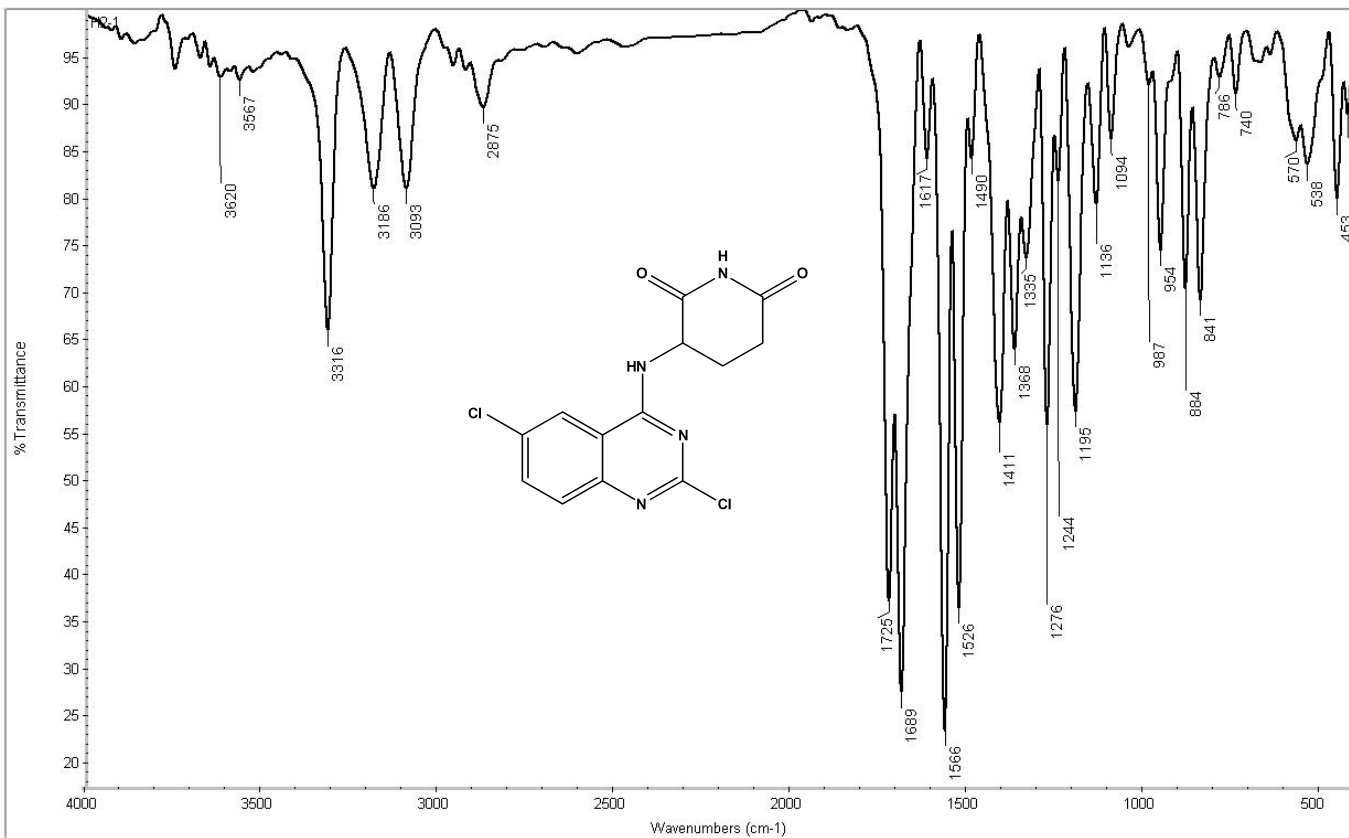

AR 14

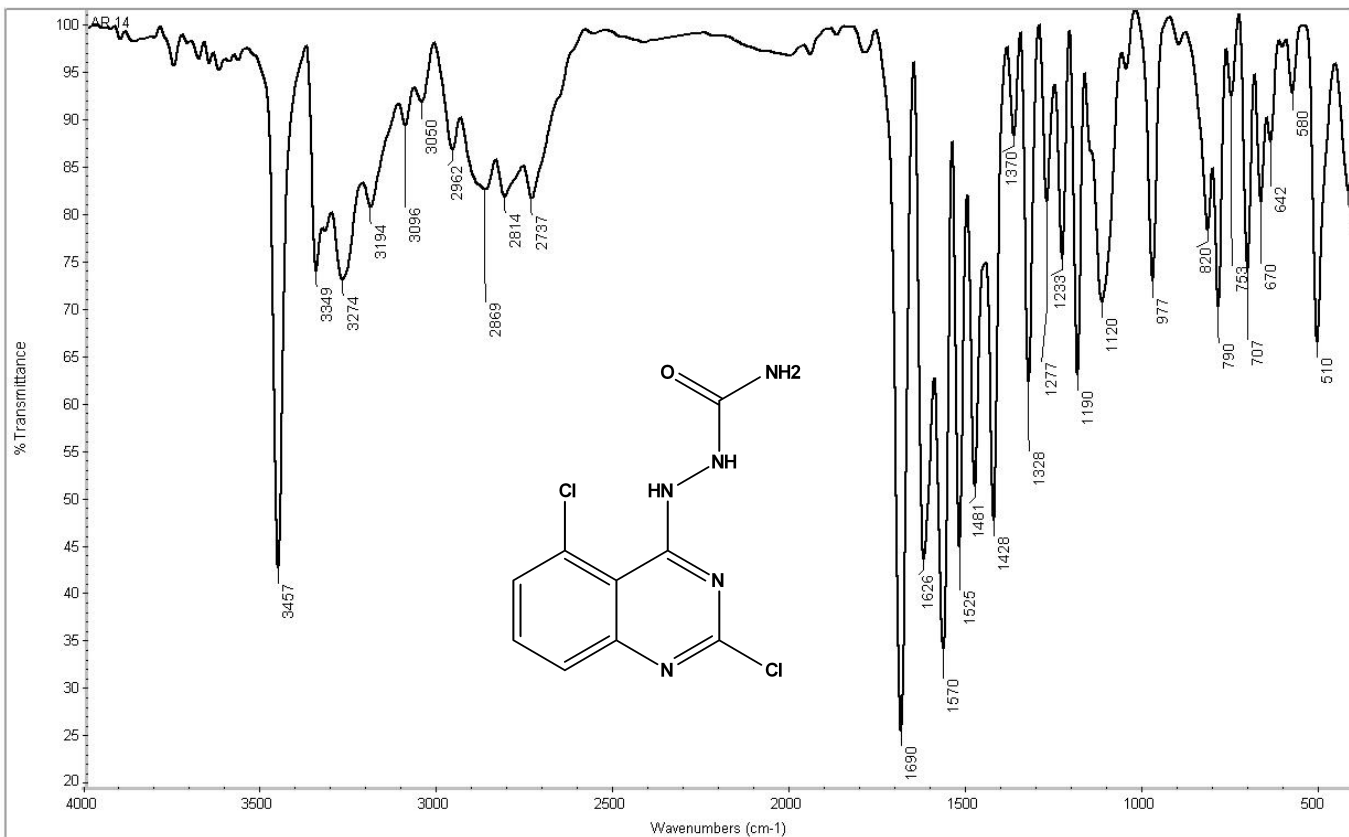

H2-2

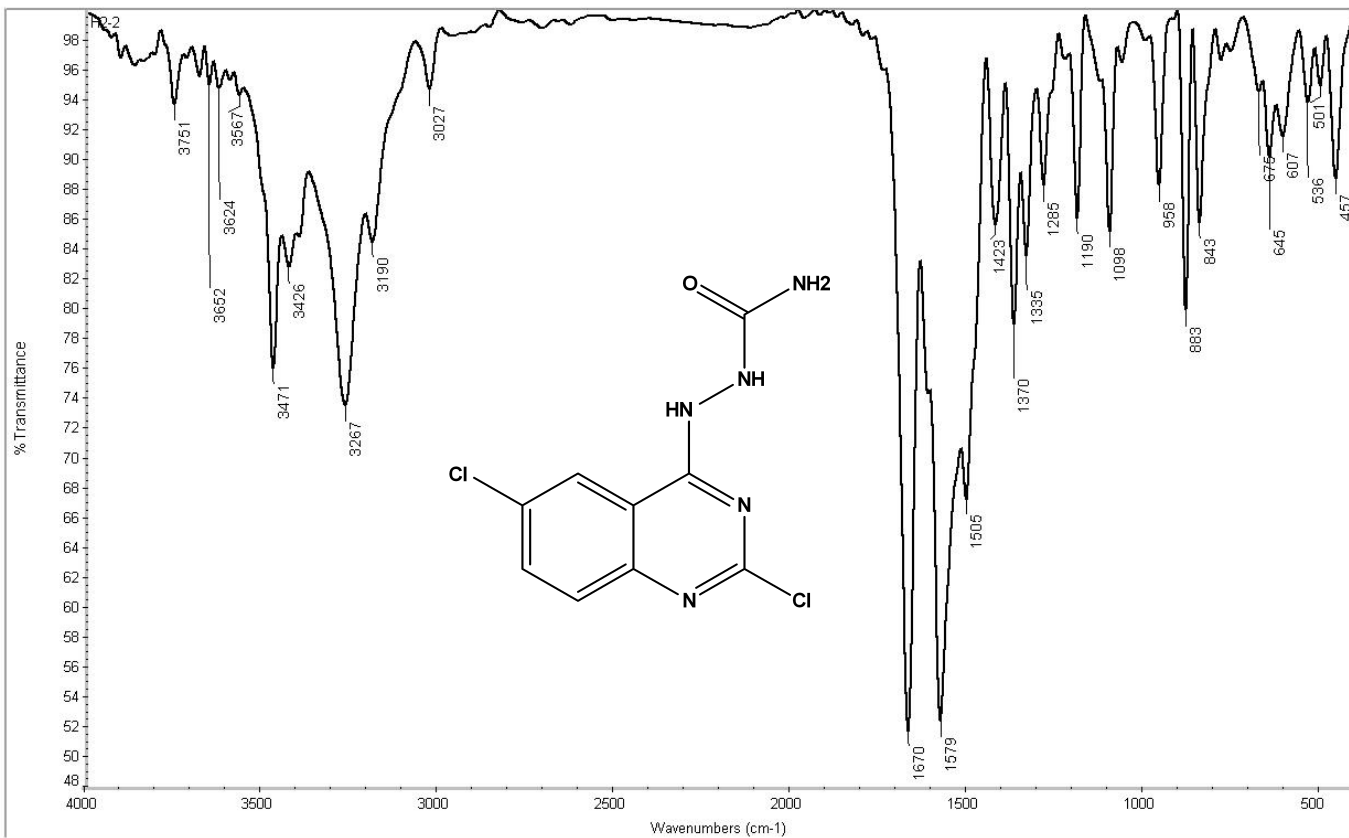

AR 18

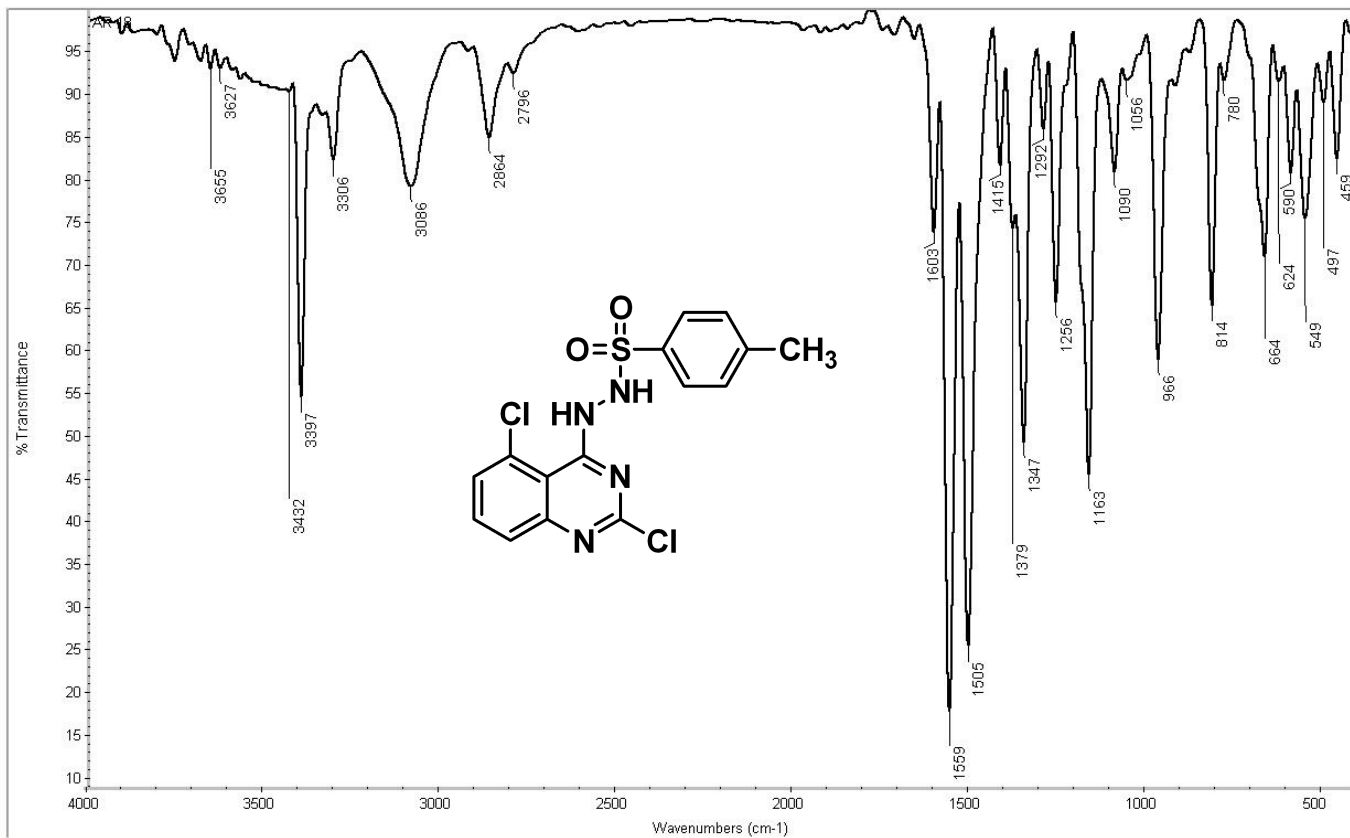

AR 17

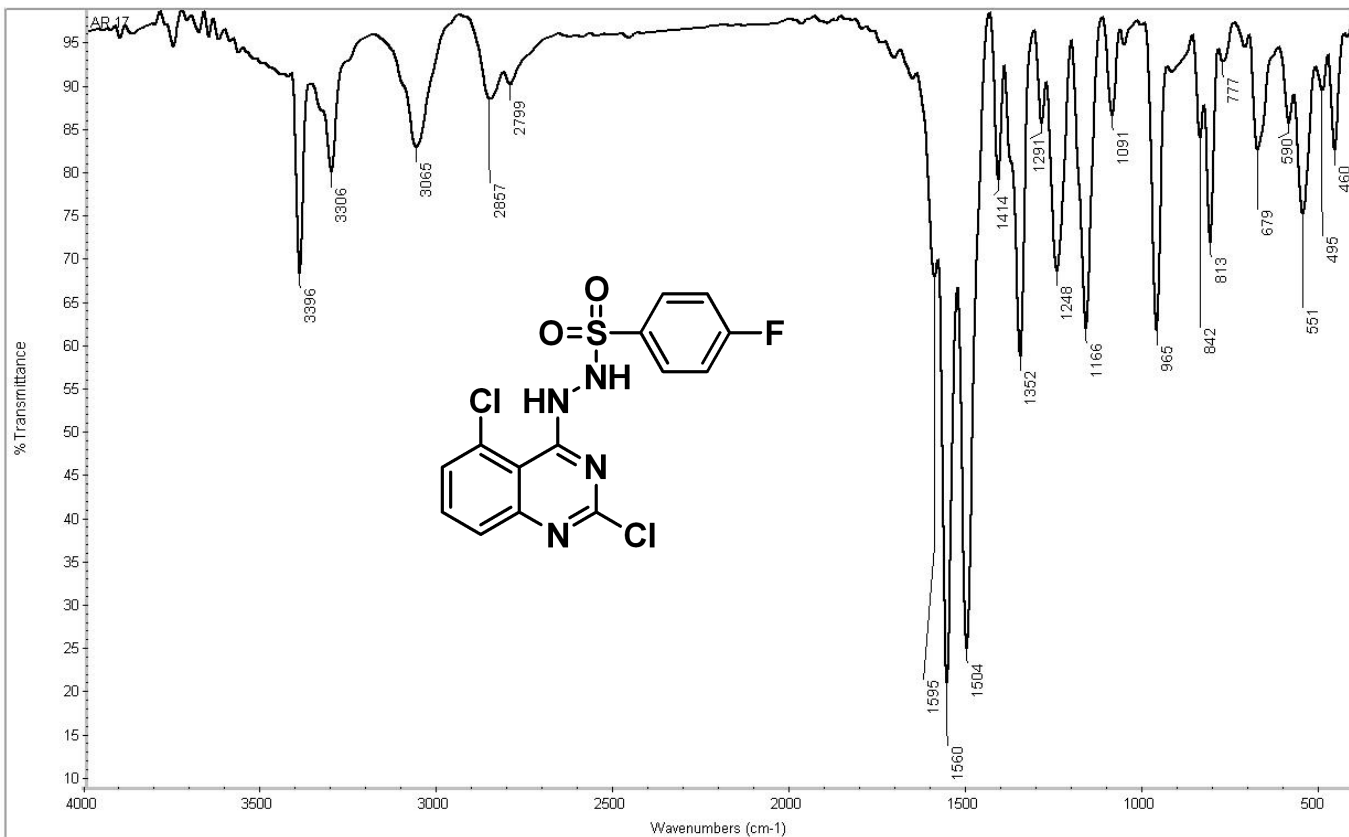

AR 11

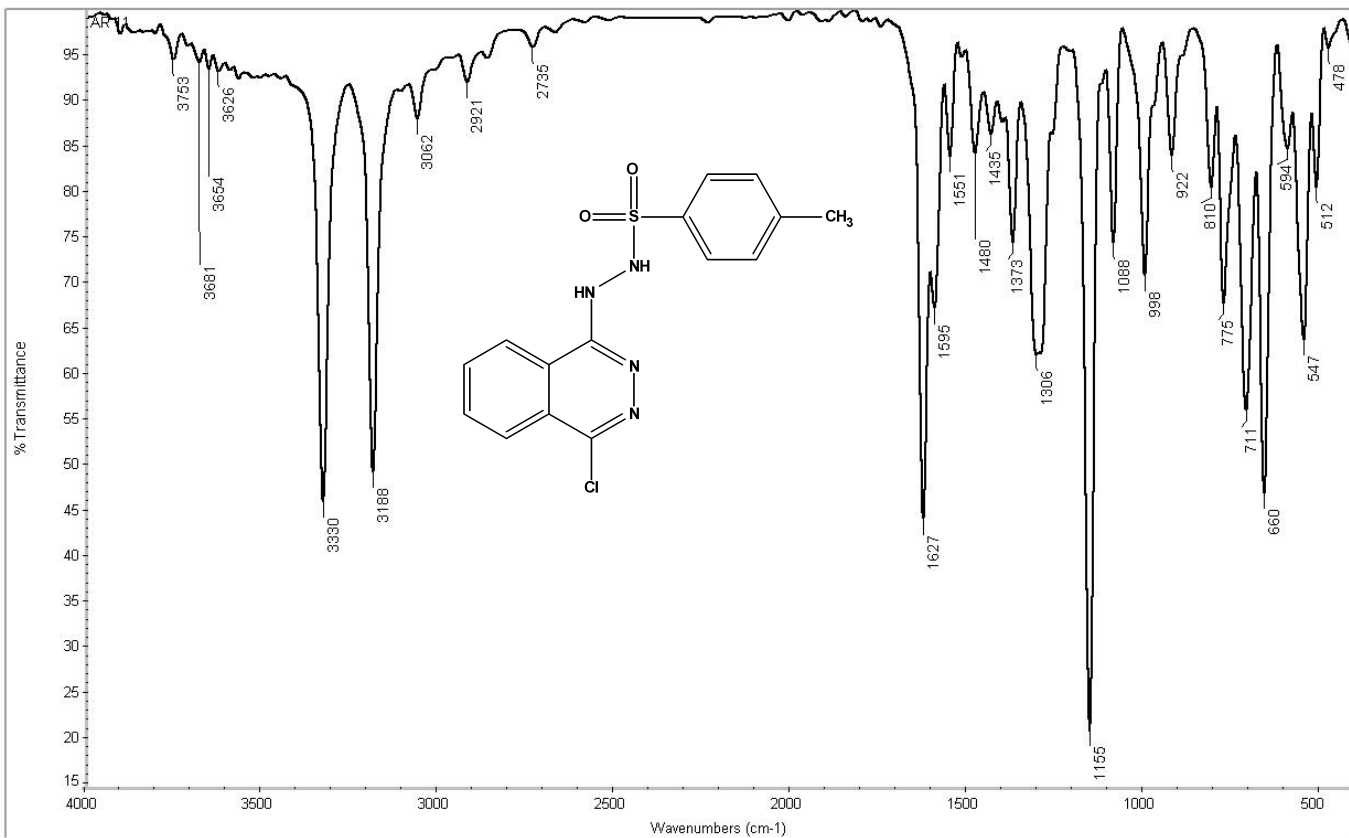

AR 10

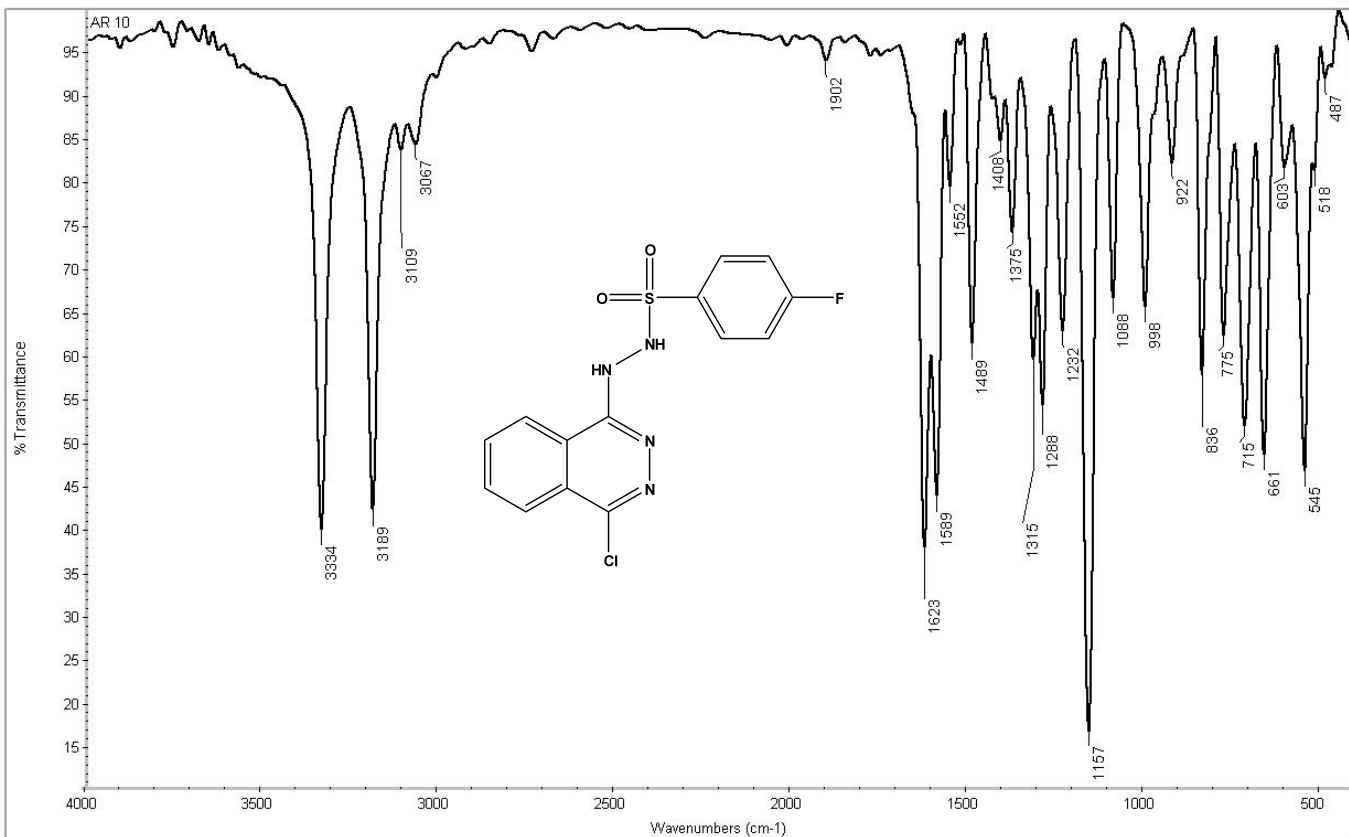

AR 12

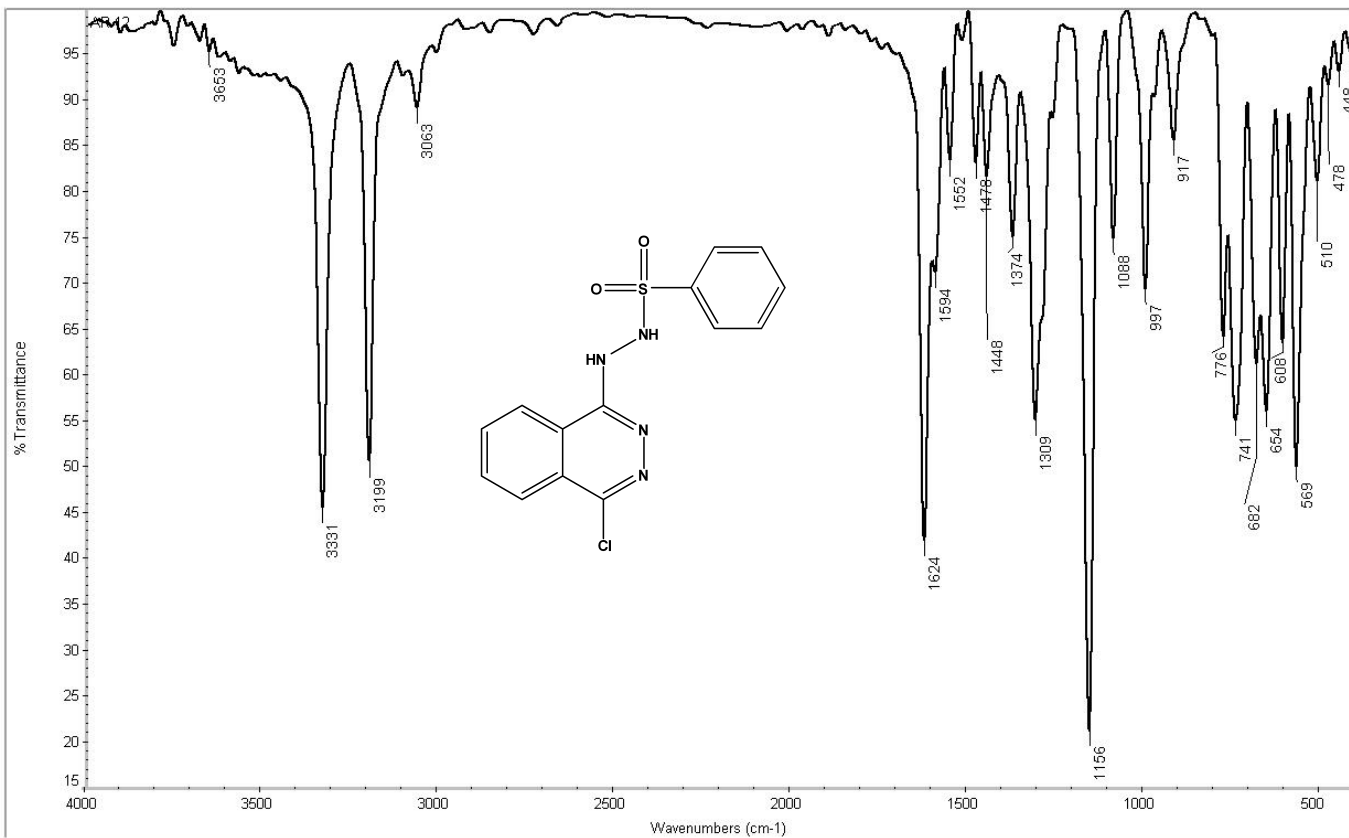

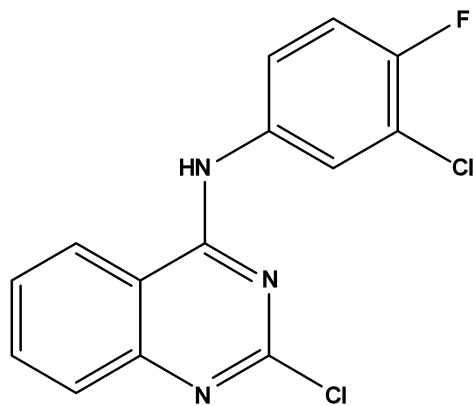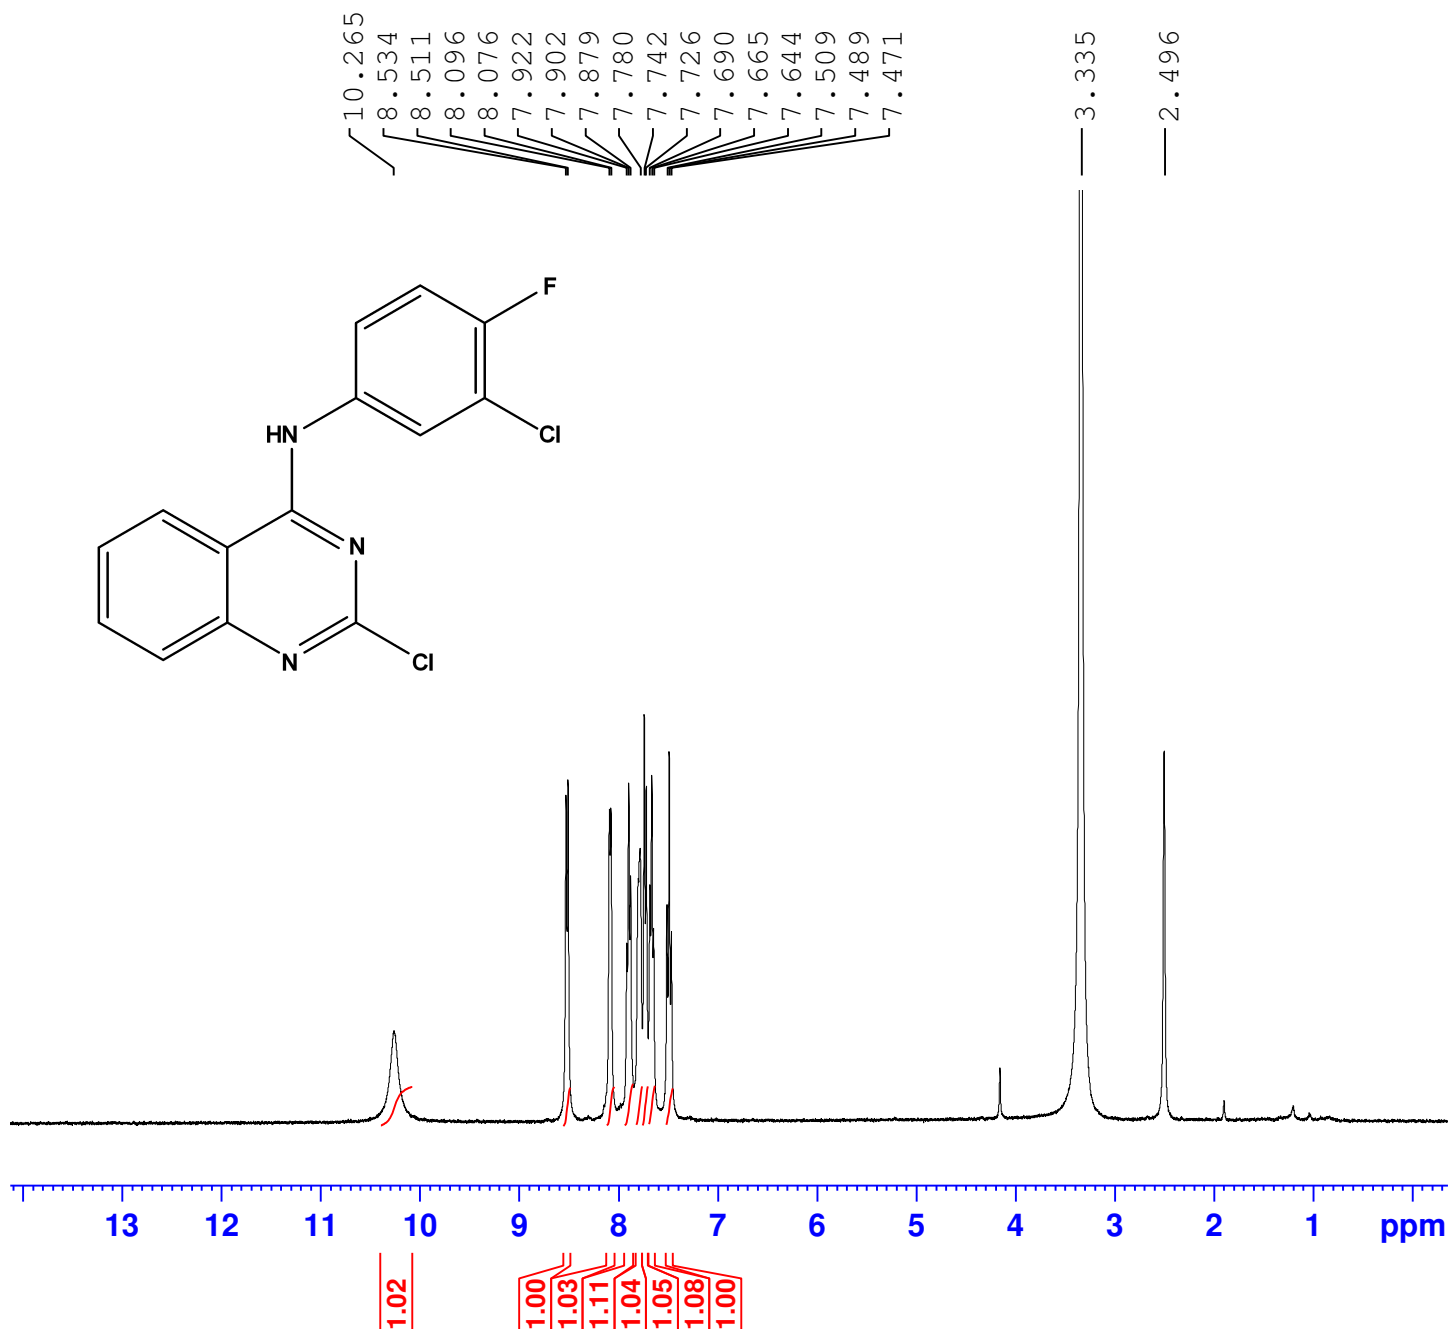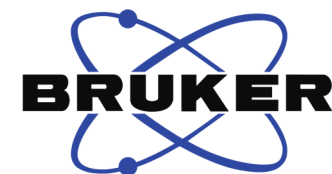

Current Data Parameters  
 NAME albraa-AR7  
 EXPNO 1  
 PROCNO 1

F2 - Acquisition Parameters  
 Date\_ 20210225  
 Time 11.20  
 INSTRUM spect  
 PROBHD 5 mm PABBO BB/  
 PULPROG zg30  
 TD 65536  
 SOLVENT DMSO  
 NS 43  
 DS 2  
 SWH 8012.820 Hz  
 FIDRES 0.122266 Hz  
 AQ 4.0894465 sec  
 RG 205.37  
 DW 62.400 usec  
 DE 6.50 usec  
 TE 300.0 K  
 D1 1.00000000 sec  
 TD0 1

===== CHANNEL f1 =====  
 SFO1 400.1524711 MHz  
 NUC1 1H  
 P1 12.00 usec  
 PLW1 18.00000000 W

F2 - Processing parameters  
 SI 65536  
 SF 400.1500000 MHz  
 WDW EM  
 SSB 0  
 LB 0.30 Hz  
 GB 0  
 PC 1.00



Current Data Parameters  
NAME albraa-AR7  
EXPNO 1  
PROCNO 1

F2 - Acquisition Parameters  
Date\_ 20210225  
Time 11.20  
INSTRUM spect  
PROBHD 5 mm PABBO BB/  
PULPROG zg30  
TD 65536  
SOLVENT DMSO  
NS 43  
DS 2  
SWH 8012.820 Hz  
FIDRES 0.122266 Hz  
AQ 4.0894465 sec  
RG 205.37  
DW 62.400 usec  
DE 6.50 usec  
TE 300.0 K  
D1 1.00000000 sec  
TD0 1

===== CHANNEL f1 =====  
SFO1 400.1524711 MHz  
NUC1 1H  
P1 12.00 usec  
PLW1 18.00000000 W

F2 - Processing parameters  
SI 65536  
SF 400.1500000 MHz  
WDW EM  
SSB 0  
LB 0.30 Hz  
GB 0  
PC 1.00

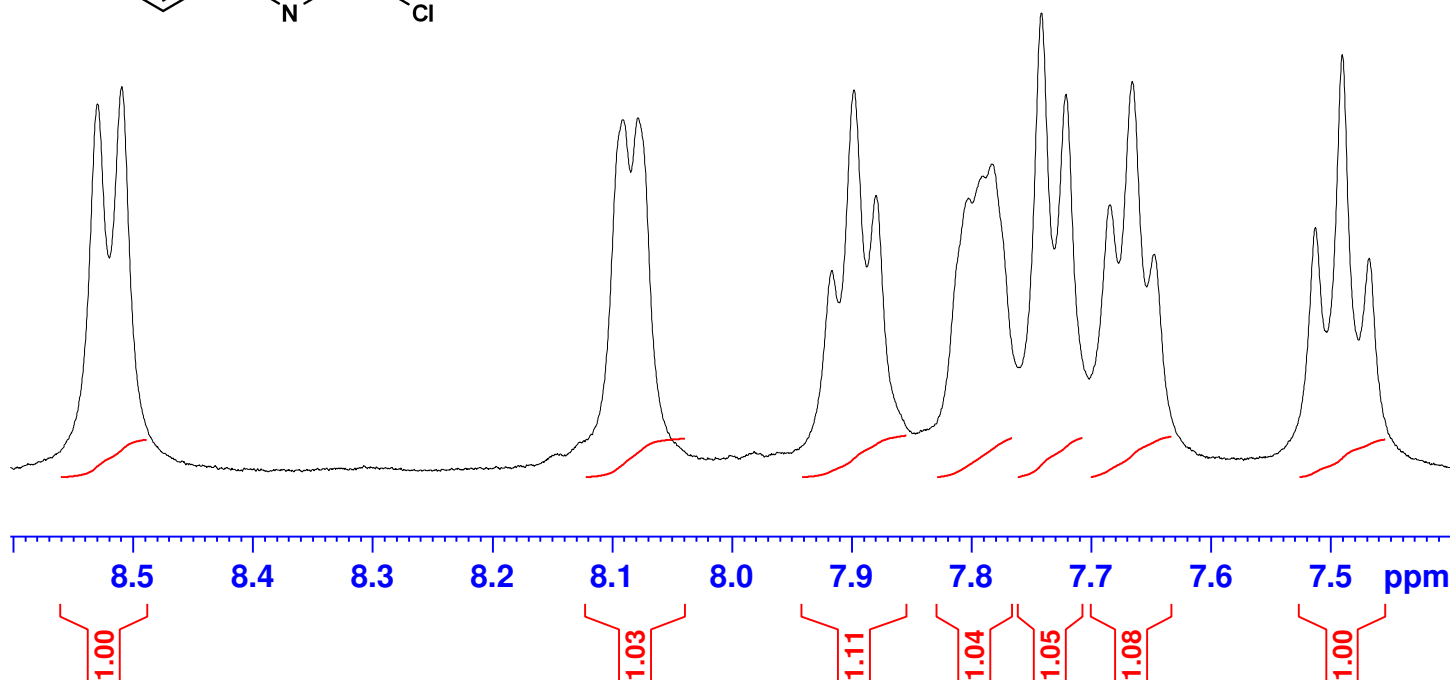

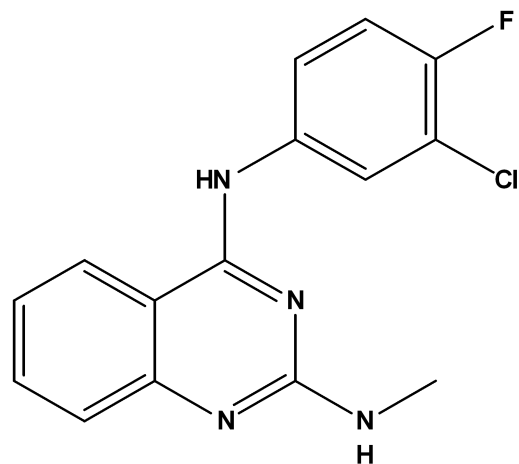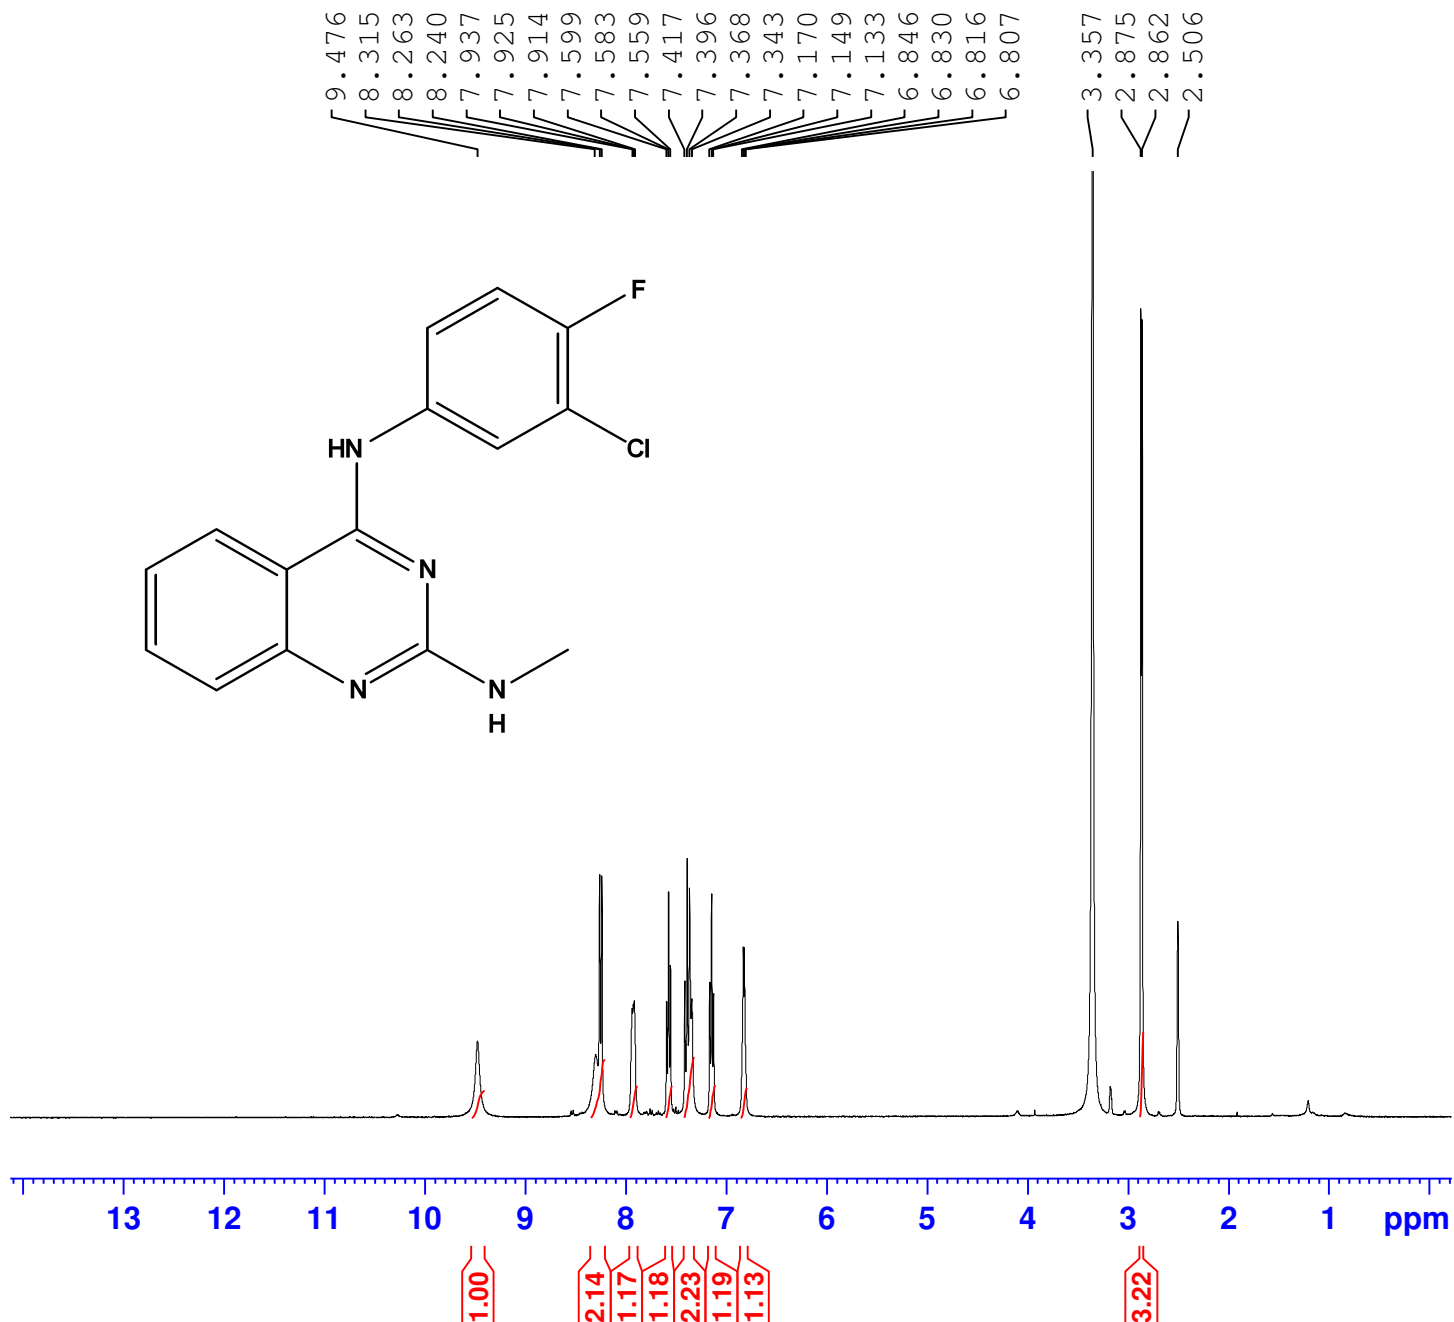

Current Data Parameters  
 NAME albraa-AR8  
 EXPNO 1  
 PROCNO 1

F2 - Acquisition Parameters  
 Date\_ 20210225  
 Time 11.27  
 INSTRUM spect  
 PROBHD 5 mm PABBO BB/  
 PULPROG zg30  
 TD 65536  
 SOLVENT DMSO  
 NS 55  
 DS 2  
 SWH 8012.820 Hz  
 FIDRES 0.122266 Hz  
 AQ 4.0894465 sec  
 RG 205.37  
 DW 62.400 usec  
 DE 6.50 usec  
 TE 300.0 K  
 D1 1.00000000 sec  
 TD0 1

===== CHANNEL f1 =====  
 SFO1 400.1524711 MHz  
 NUC1 1H  
 P1 12.00 usec  
 PLW1 18.00000000 W

F2 - Processing parameters  
 SI 65536  
 SF 400.1500000 MHz  
 WDW EM  
 SSB 0  
 LB 0.30 Hz  
 GB 0  
 PC 1.00



Current Data Parameters  
 NAME albraa-AR8  
 EXPNO 1  
 PROCNO 1

F2 - Acquisition Parameters  
 Date\_ 20210225  
 Time 11.27  
 INSTRUM spect  
 PROBHD 5 mm PABBO BB/  
 PULPROG zg30  
 TD 65536  
 SOLVENT DMSO  
 NS 55  
 DS 2  
 SWH 8012.820 Hz  
 FIDRES 0.122266 Hz  
 AQ 4.0894465 sec  
 RG 205.37  
 DW 62.400 usec  
 DE 6.50 usec  
 TE 300.0 K  
 D1 1.00000000 sec  
 TD0 1

===== CHANNEL f1 =====  
 SFO1 400.1524711 MHz  
 NUC1 1H  
 P1 12.00 usec  
 PLW1 18.00000000 W

F2 - Processing parameters  
 SI 65536  
 SF 400.1500000 MHz  
 WDW EM  
 SSB 0  
 LB 0.30 Hz  
 GB 0  
 PC 1.00

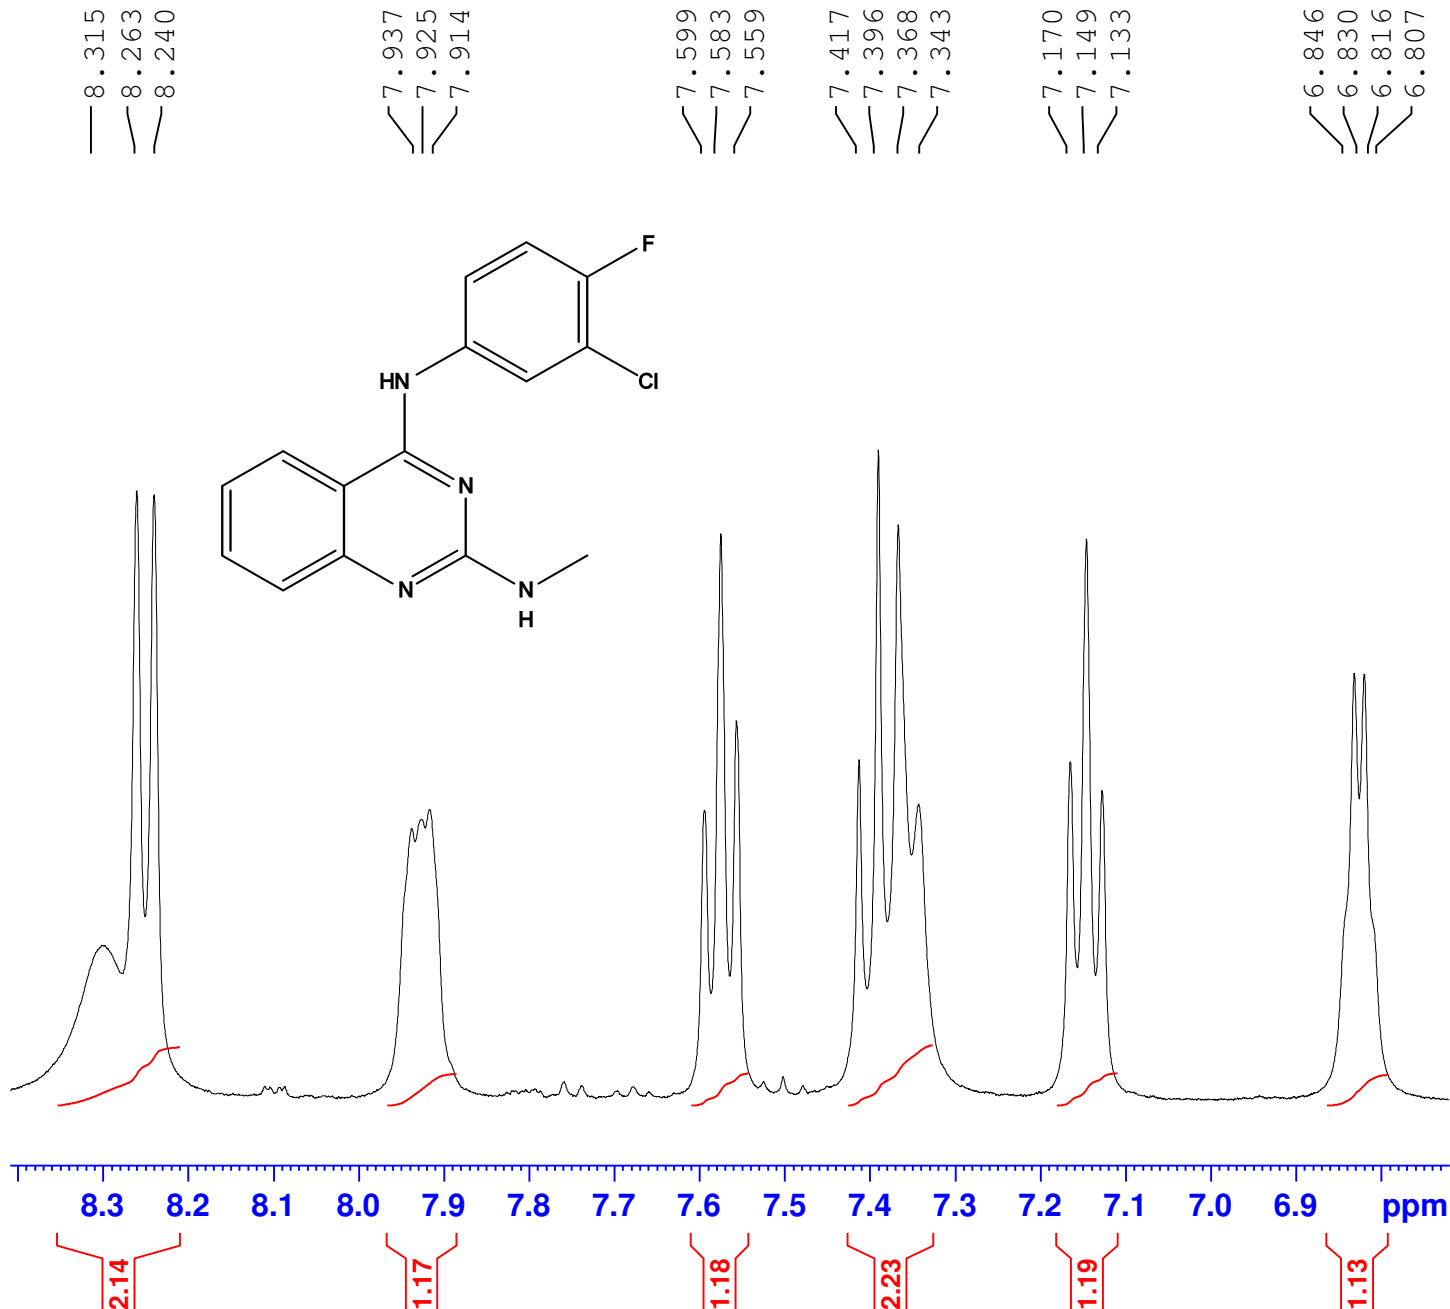

— 3.357

— 2.875  
— 2.862

— 2.506

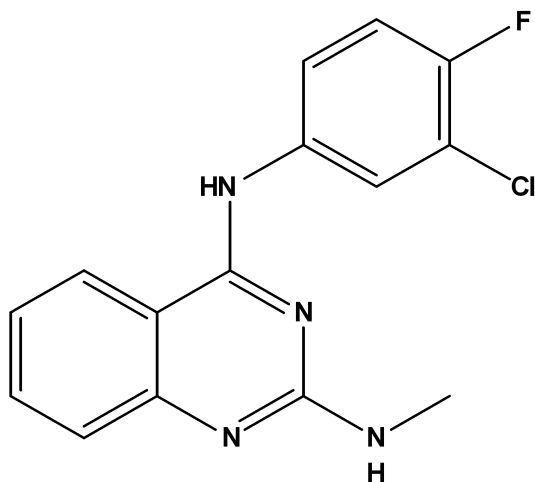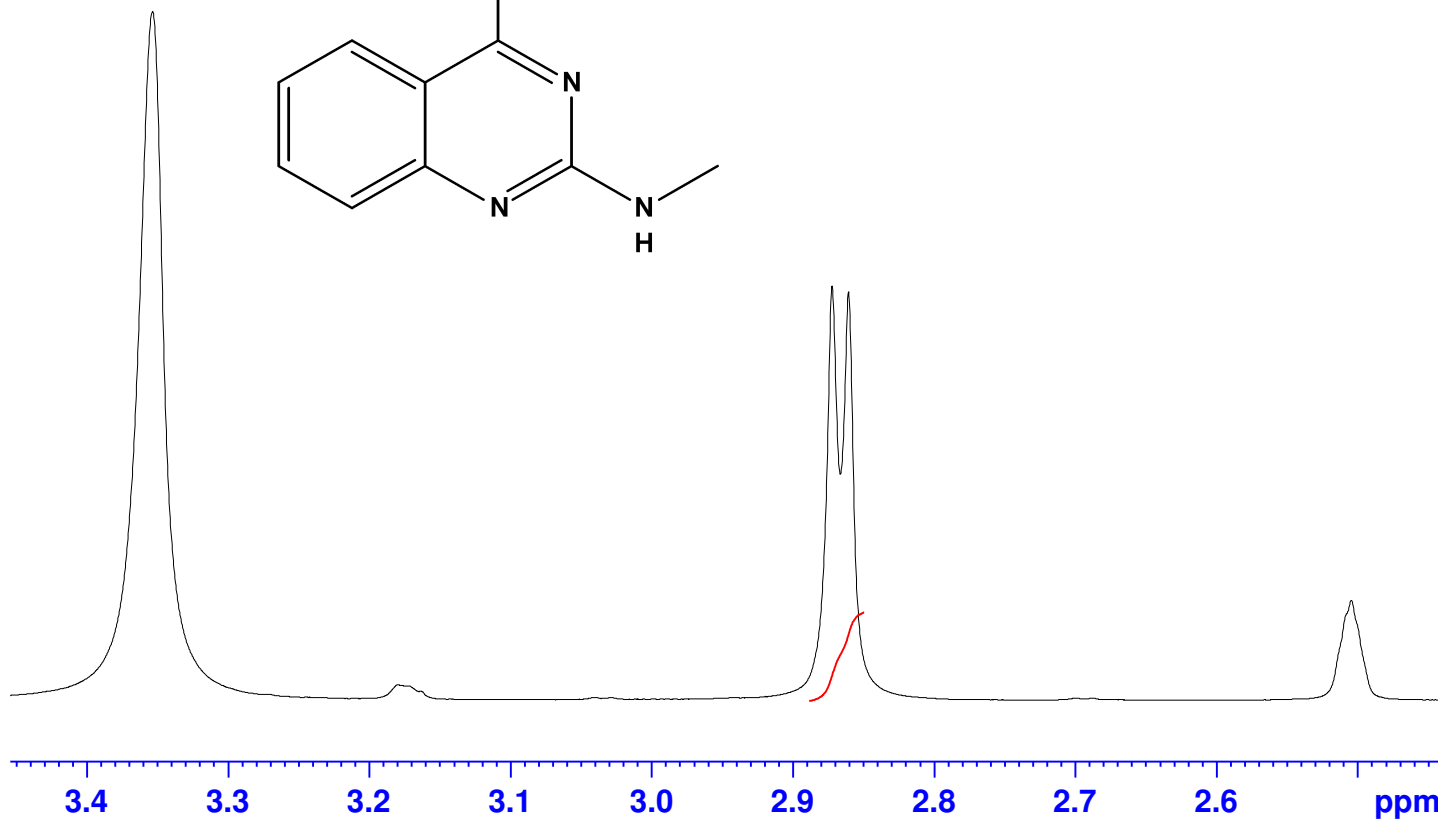

3.22



Current Data Parameters  
NAME albraa-AR8  
EXPNO 1  
PROCNO 1

F2 - Acquisition Parameters  
Date\_ 20210225  
Time 11.27  
INSTRUM spect  
PROBHD 5 mm PABBO BB/  
PULPROG zg30  
TD 65536  
SOLVENT DMSO  
NS 55  
DS 2  
SWH 8012.820 Hz  
FIDRES 0.122266 Hz  
AQ 4.0894465 sec  
RG 205.37  
DW 62.400 usec  
DE 6.50 usec  
TE 300.0 K  
D1 1.00000000 sec  
TD0 1

===== CHANNEL f1 =====  
SFO1 400.1524711 MHz  
NUC1 1H  
P1 12.00 usec  
PLW1 18.00000000 W

F2 - Processing parameters  
SI 65536  
SF 400.1500000 MHz  
WDW EM  
SSB 0  
LB 0.30 Hz  
GB 0  
PC 1.00

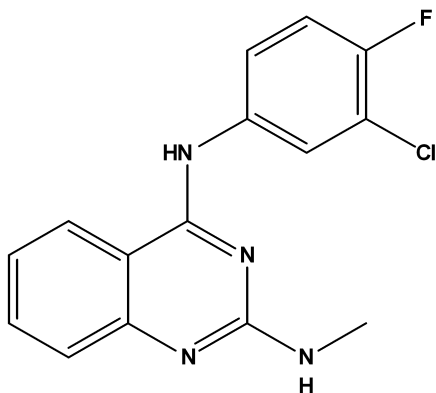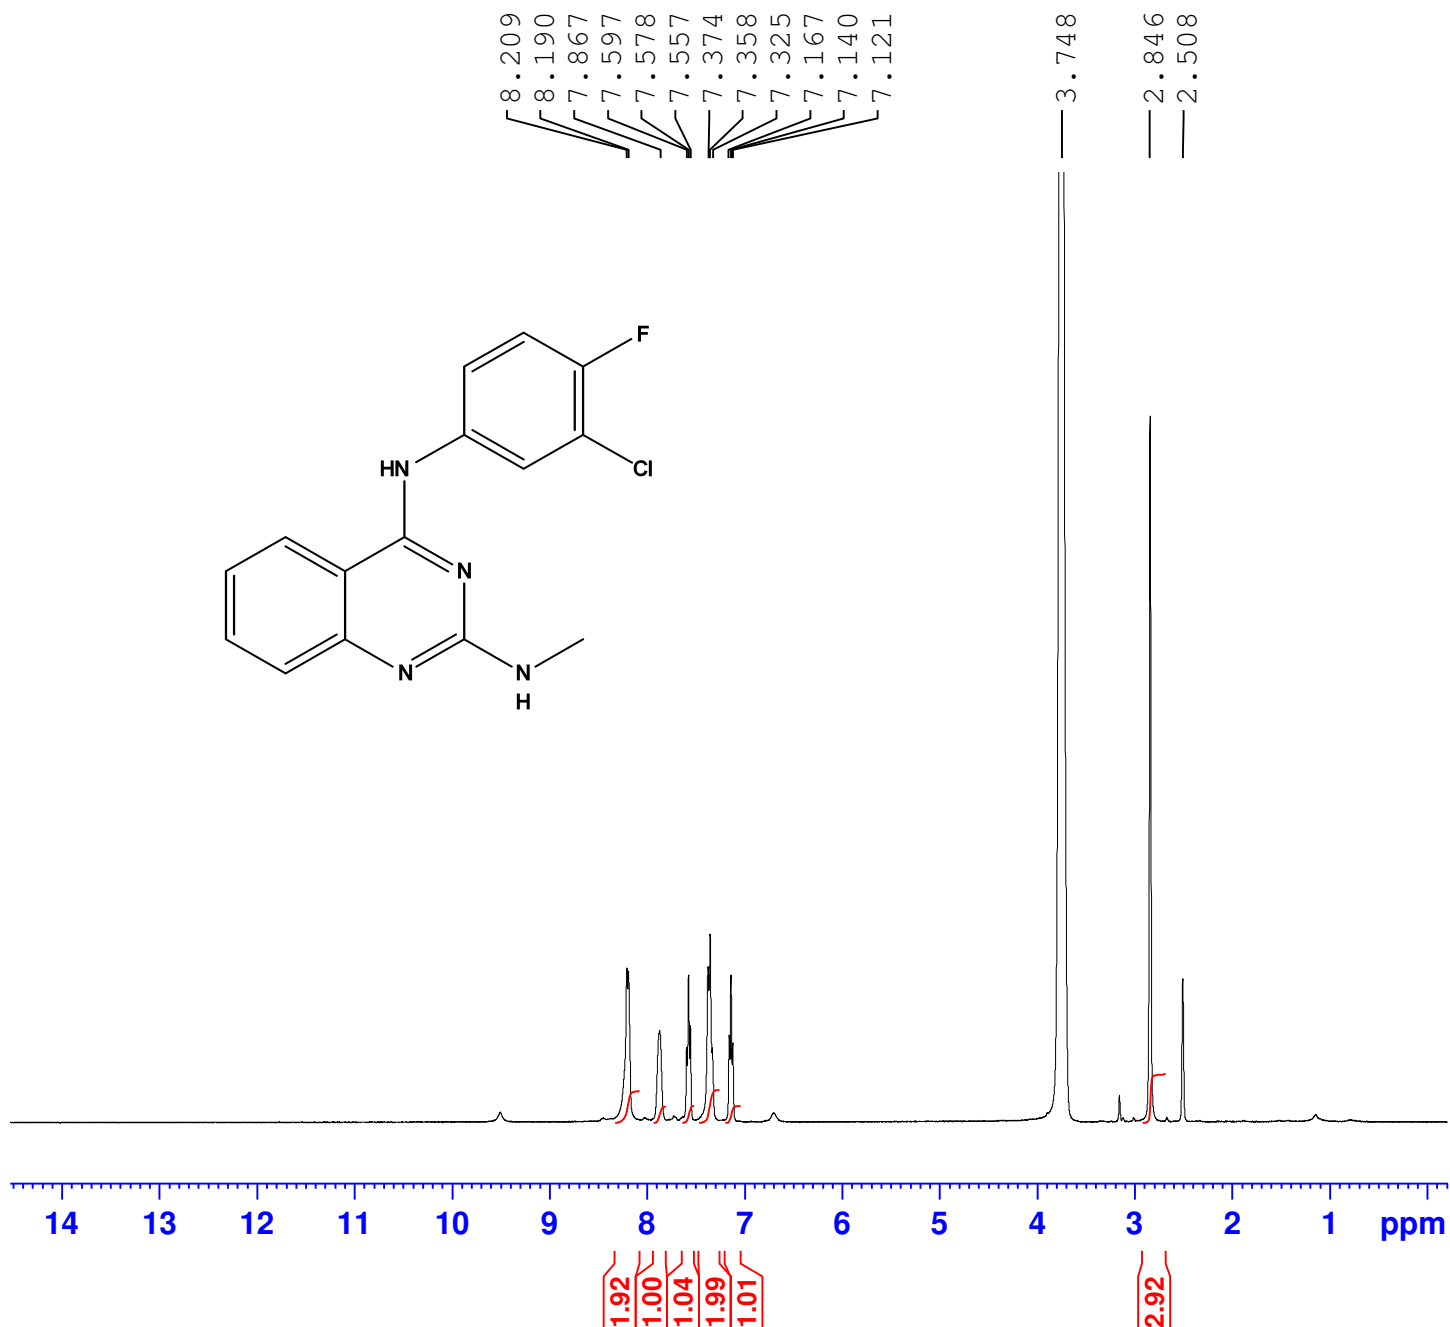

Current Data Parameters  
 NAME albraa-AR8-d2o  
 EXPNO 1  
 PROCNO 1

F2 - Acquisition Parameters  
 Date\_ 20210228  
 Time 11.32  
 INSTRUM spect  
 PROBHD 5 mm PABBO BB/  
 PULPROG zg30  
 TD 65536  
 SOLVENT DMSO  
 NS 59  
 DS 2  
 SWH 8012.820 Hz  
 FIDRES 0.122266 Hz  
 AQ 4.0894465 sec  
 RG 205.37  
 DW 62.400 usec  
 DE 6.50 usec  
 TE 300.0 K  
 D1 1.00000000 sec  
 TD0 1

===== CHANNEL f1 =====  
 SFO1 400.1524711 MHz  
 NUC1 1H  
 P1 12.00 usec  
 PLW1 18.00000000 W

F2 - Processing parameters  
 SI 65536  
 SF 400.1500000 MHz  
 WDW EM  
 SSB 0  
 LB 0.30 Hz  
 GB 0  
 PC 1.00

<sup>13</sup>C NMR of 7b

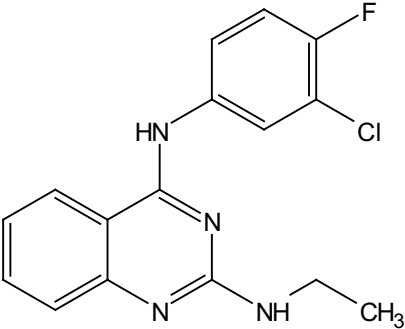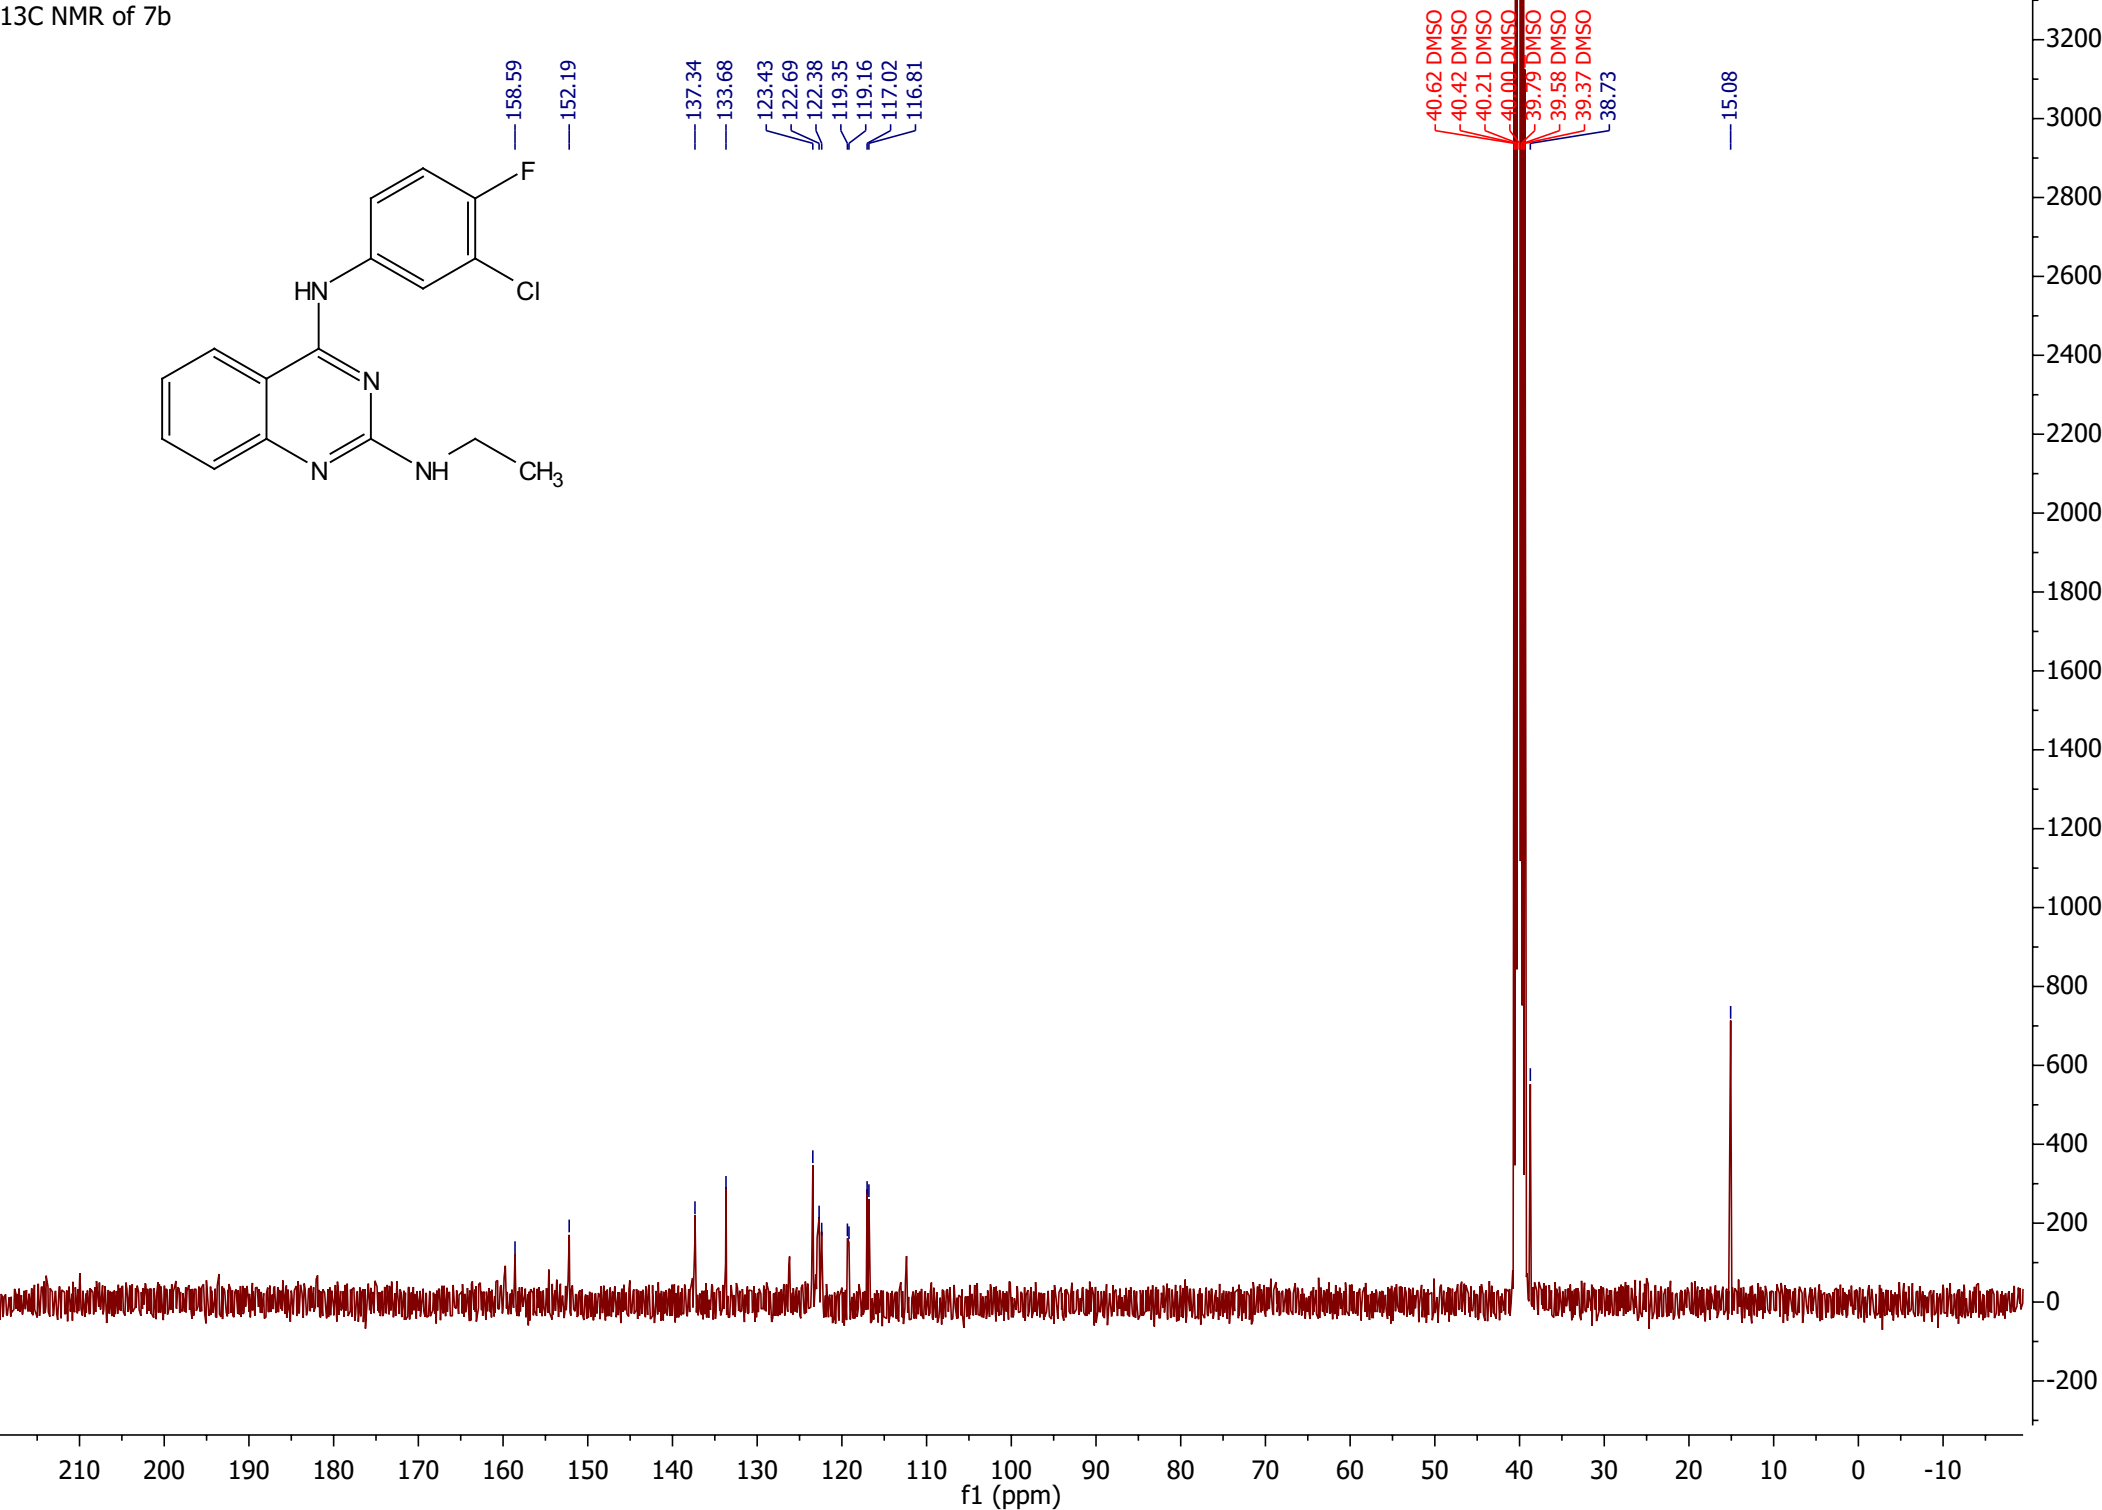

<sup>13</sup>C NMR of 7b

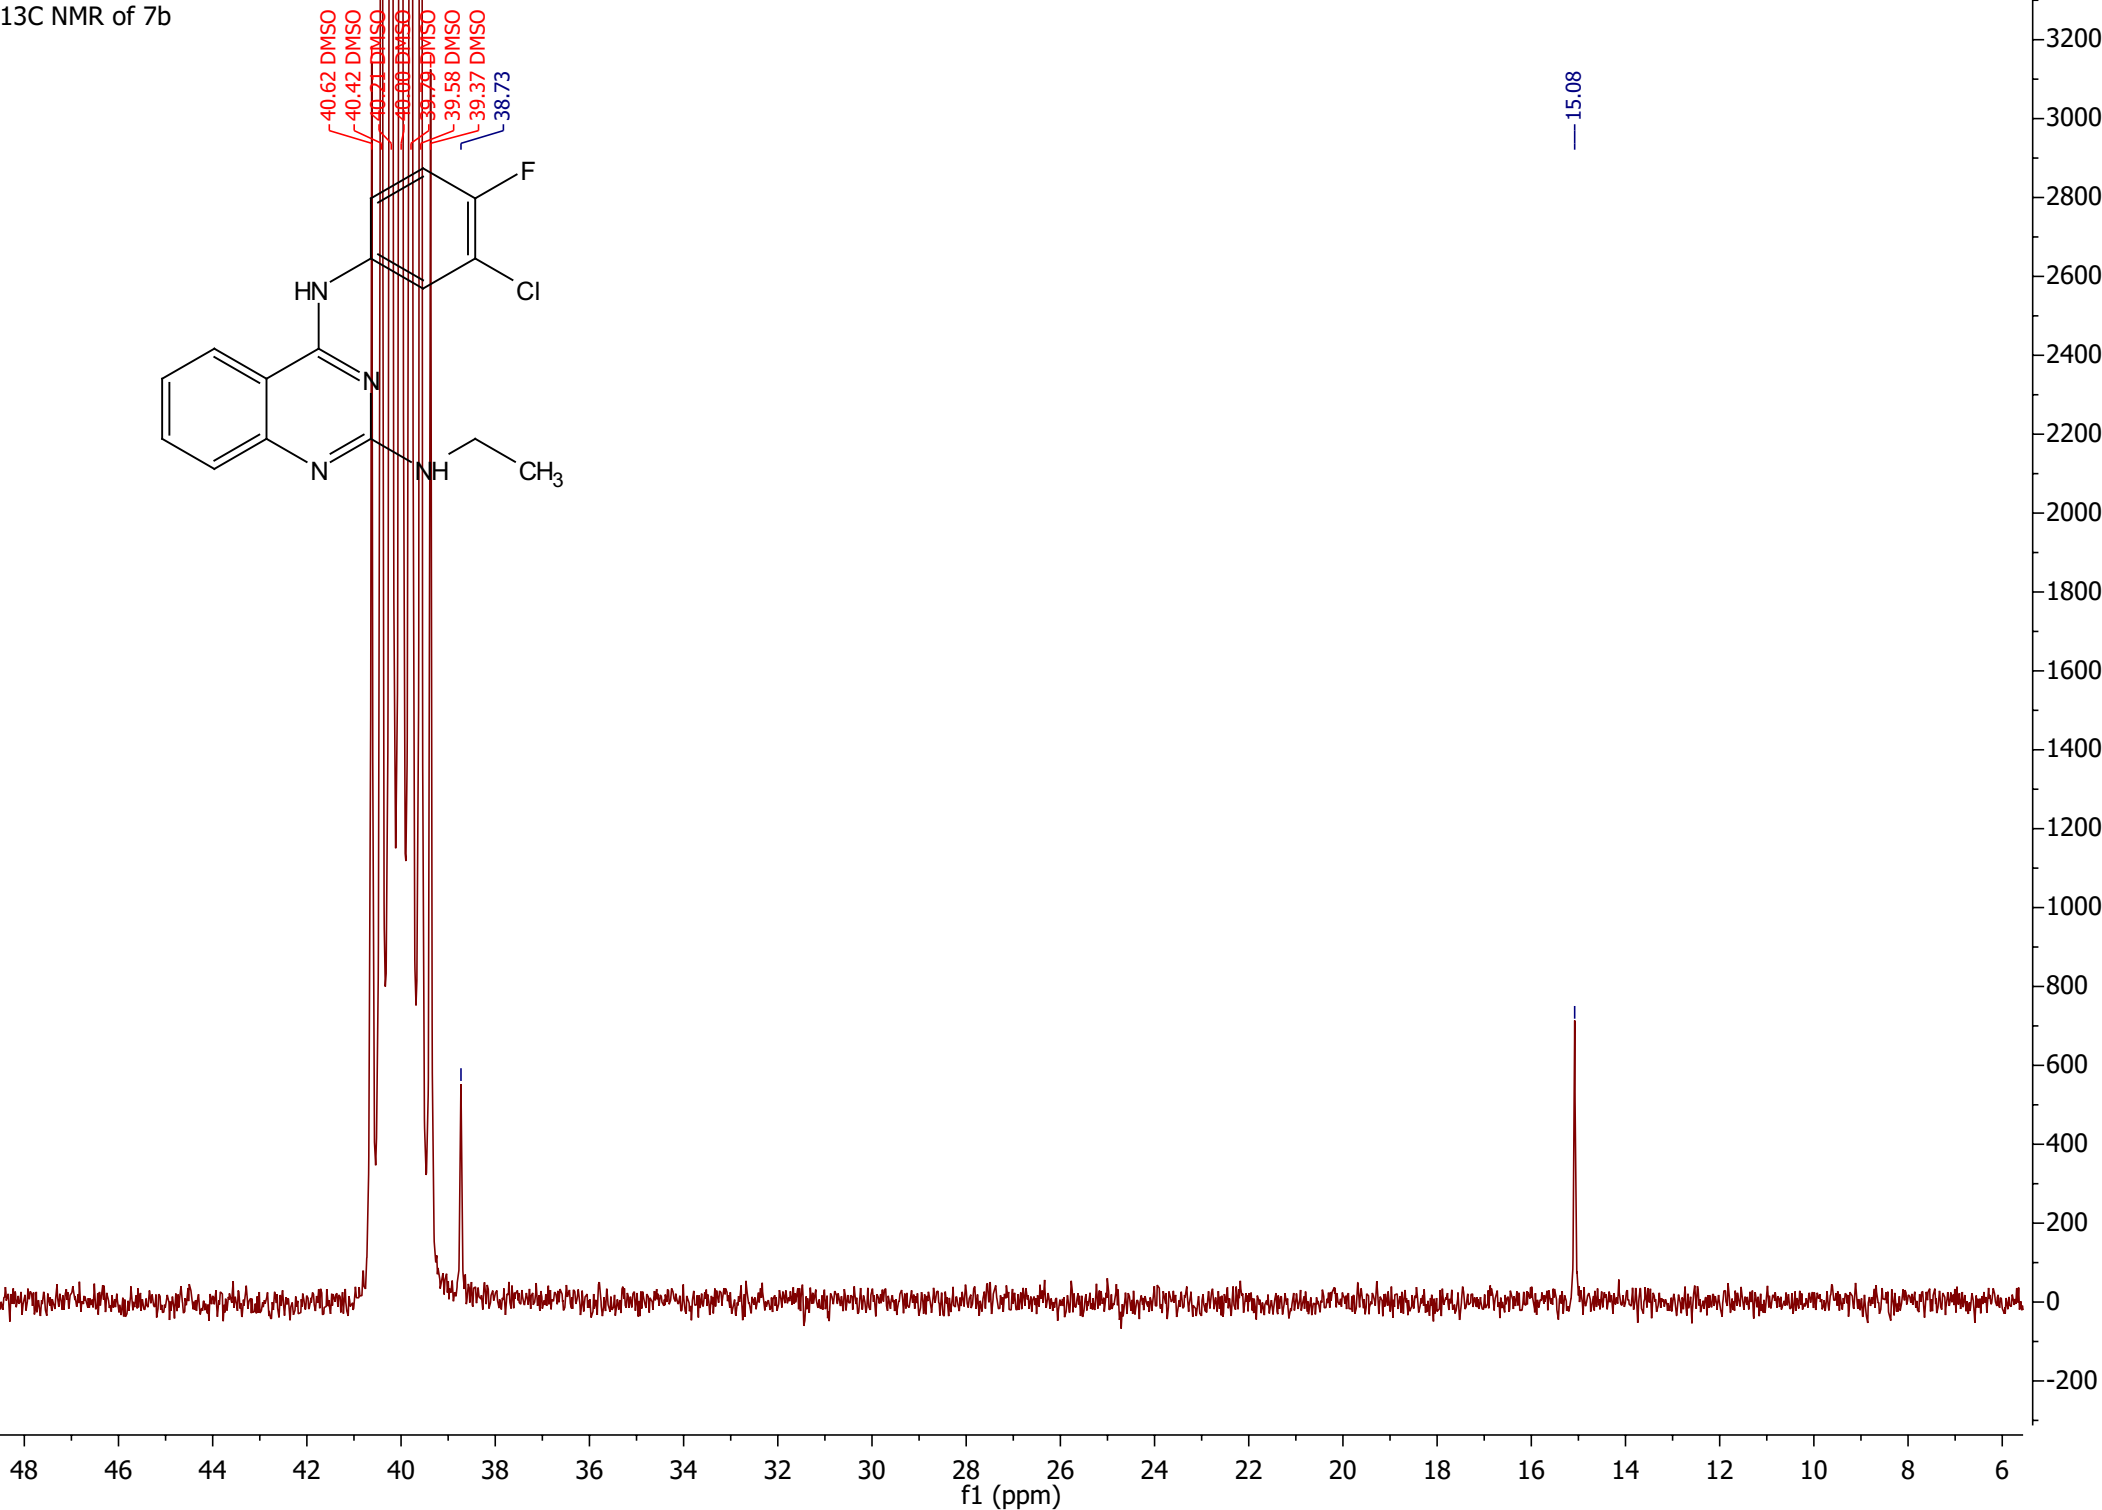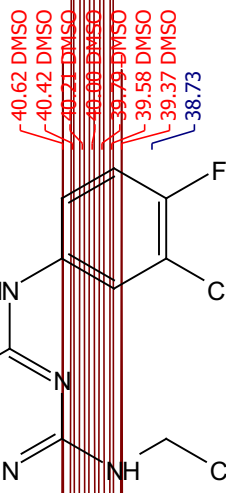

Peak assignments (ppm) for 7b in DMSO-d<sub>6</sub>:

- 40.62 DMSO
- 40.42 DMSO
- 40.21 DMSO
- 40.00 DMSO
- 39.79 DMSO
- 39.58 DMSO
- 39.37 DMSO
- 38.73
- 15.08

<sup>13</sup>C NMR of 7b

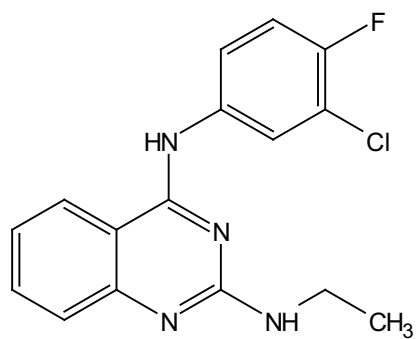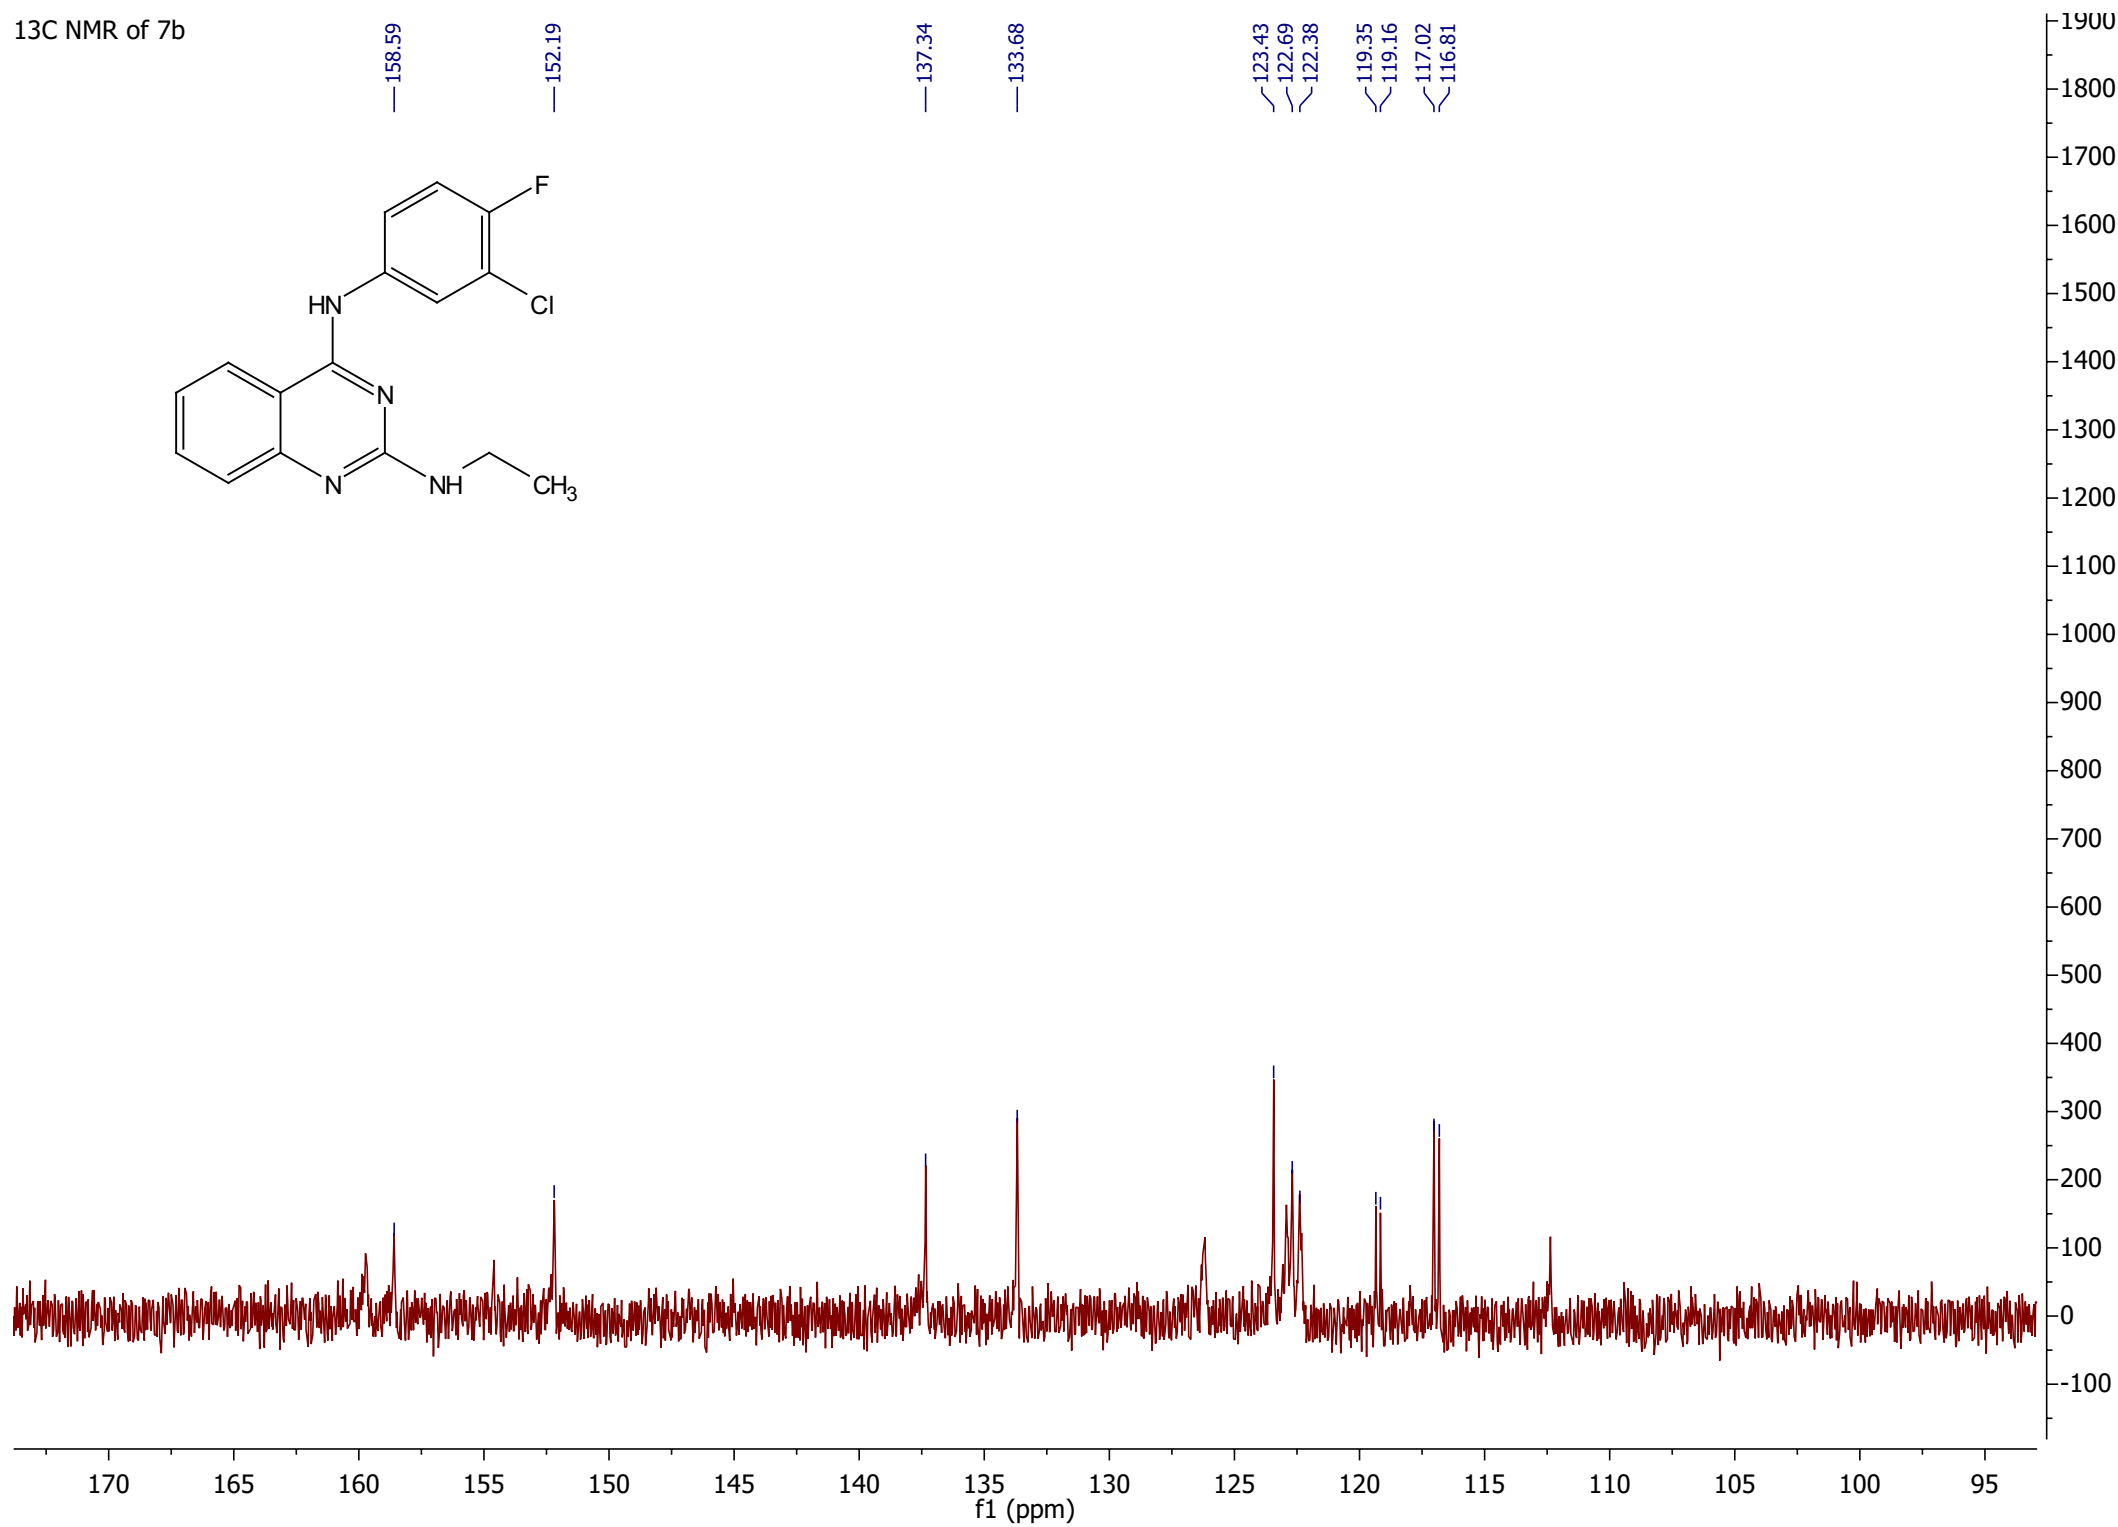

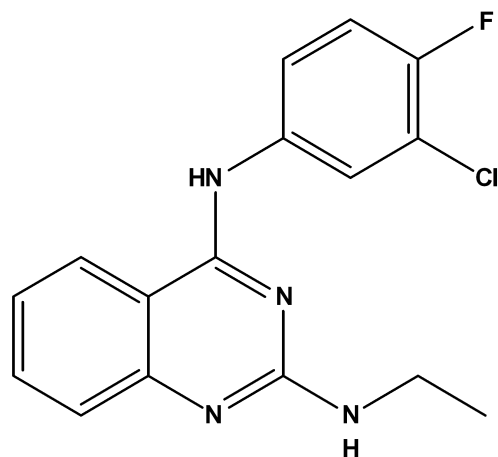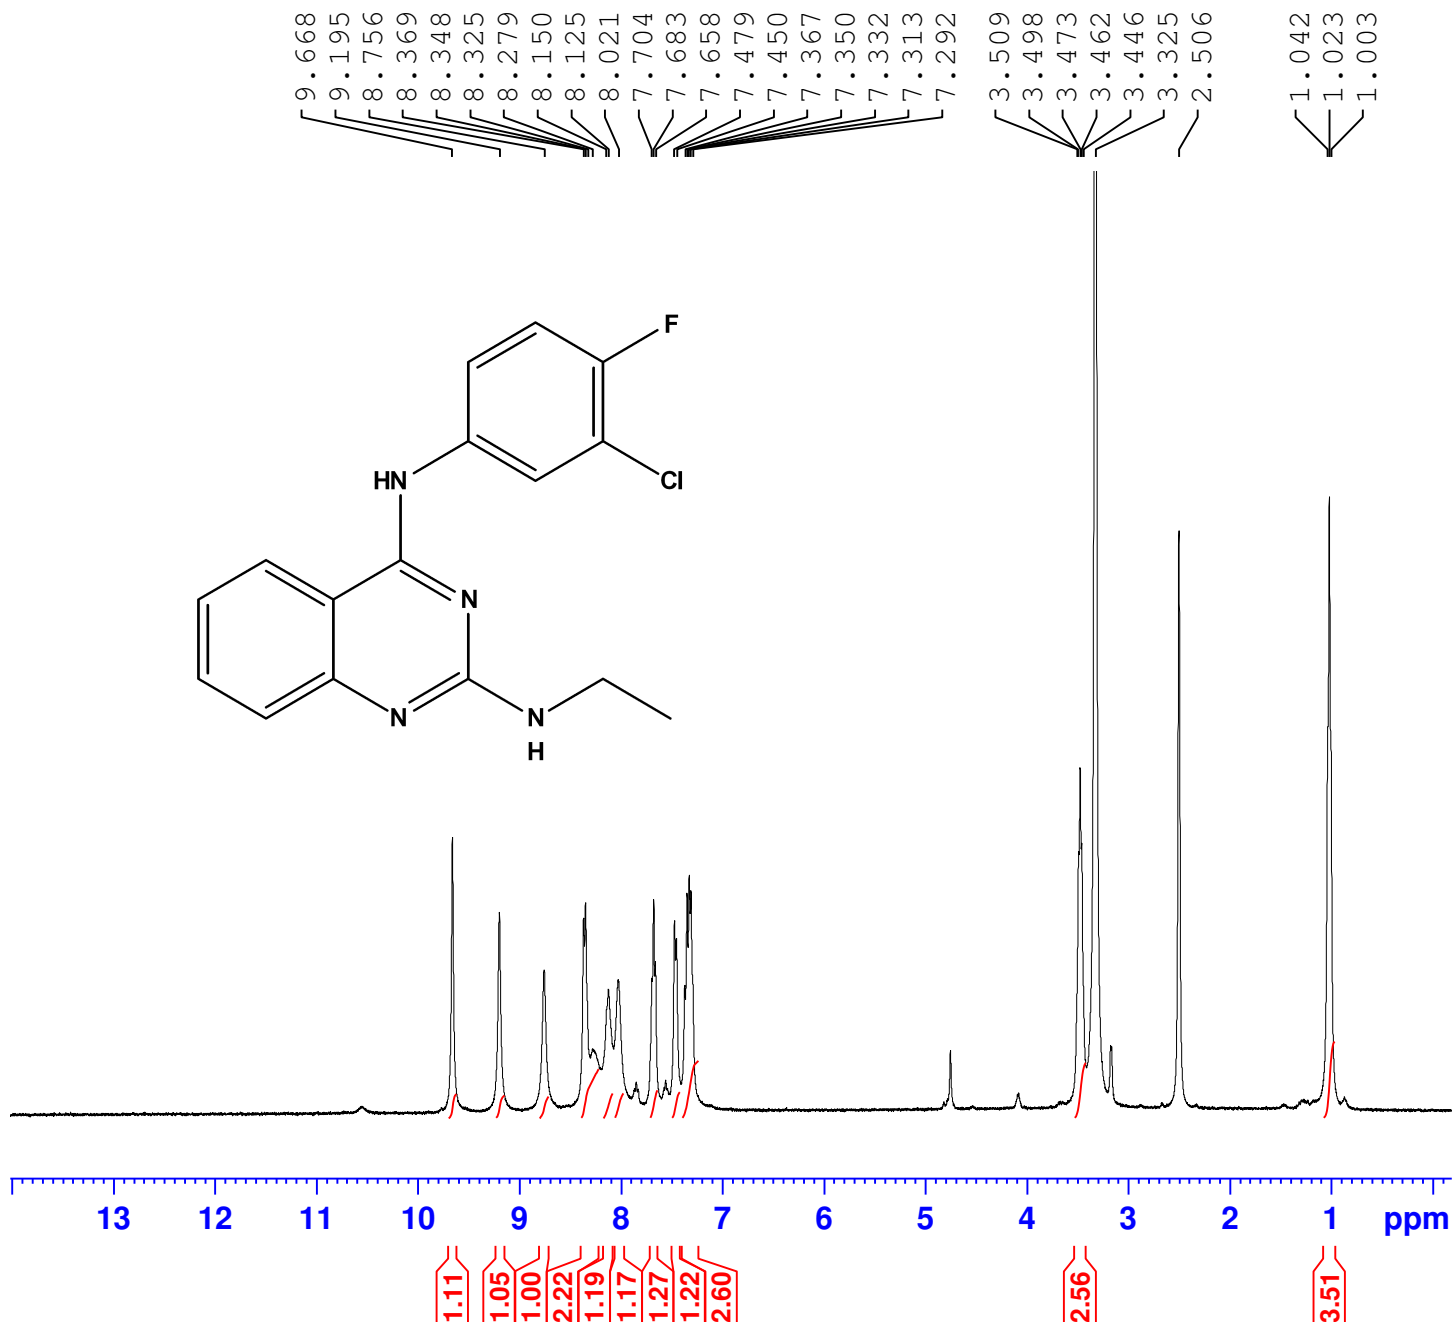

Current Data Parameters  
 NAME albraa-AR9  
 EXPNO 1  
 PROCNO 1

F2 - Acquisition Parameters  
 Date\_ 20210225  
 Time 11.40  
 INSTRUM spect  
 PROBHD 5 mm PABBO BB/  
 PULPROG zg30  
 TD 65536  
 SOLVENT DMSO  
 NS 119  
 DS 2  
 SWH 8012.820 Hz  
 FIDRES 0.122266 Hz  
 AQ 4.0894465 sec  
 RG 205.37  
 DW 62.400 usec  
 DE 6.50 usec  
 TE 300.0 K  
 D1 1.00000000 sec  
 TD0 1

===== CHANNEL f1 =====  
 SFO1 400.1524711 MHz  
 NUC1 1H  
 P1 12.00 usec  
 PLW1 18.00000000 W

F2 - Processing parameters  
 SI 65536  
 SF 400.1500000 MHz  
 WDW EM  
 SSB 0  
 LB 0.30 Hz  
 GB 0  
 PC 1.00

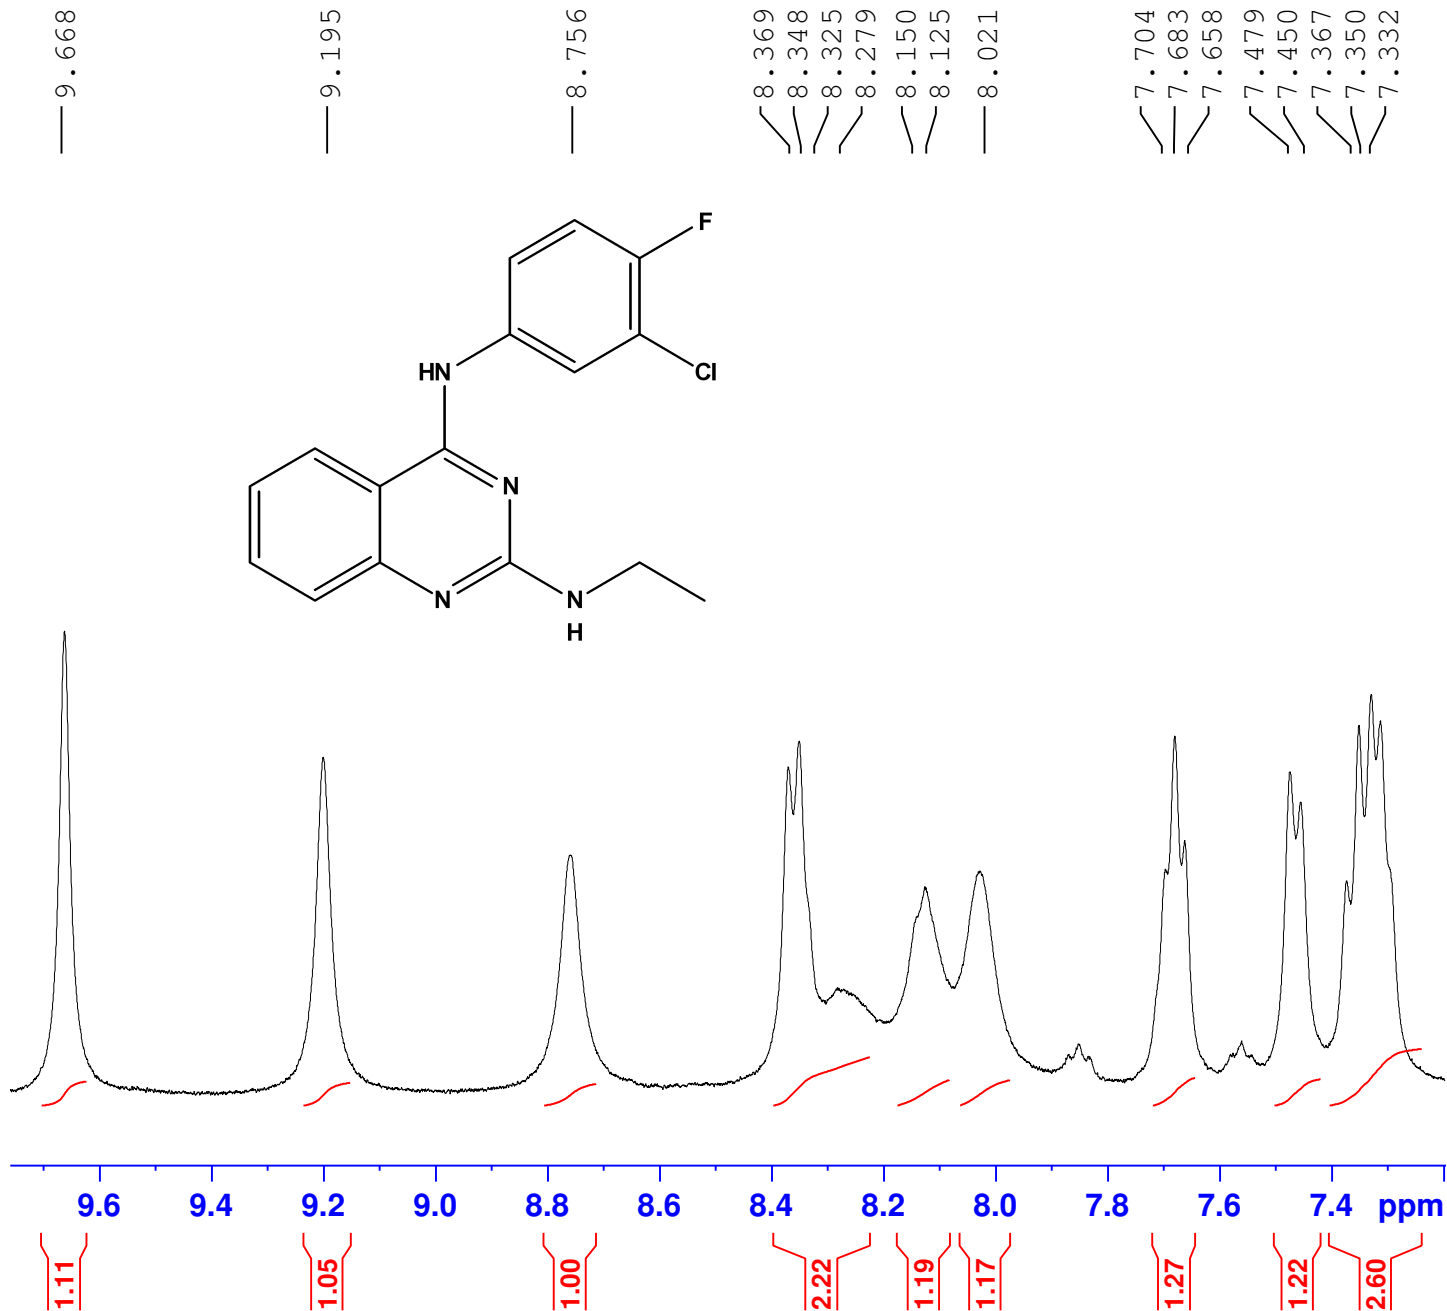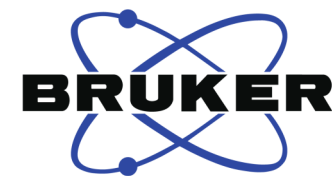

Current Data Parameters  
 NAME albraa-AR9  
 EXPNO 1  
 PROCNO 1

F2 - Acquisition Parameters  
 Date\_ 20210225  
 Time 11.40  
 INSTRUM spect  
 PROBHD 5 mm PABBO BB/  
 PULPROG zg30  
 TD 65536  
 SOLVENT DMSO  
 NS 119  
 DS 2  
 SWH 8012.820 Hz  
 FIDRES 0.122266 Hz  
 AQ 4.0894465 sec  
 RG 205.37  
 DW 62.400 usec  
 DE 6.50 usec  
 TE 300.0 K  
 D1 1.00000000 sec  
 TD0 1

===== CHANNEL f1 =====  
 SFO1 400.1524711 MHz  
 NUC1 1H  
 P1 12.00 usec  
 PLW1 18.00000000 W

F2 - Processing parameters  
 SI 65536  
 SF 400.1500000 MHz  
 WDW EM  
 SSB 0  
 LB 0.30 Hz  
 GB 0  
 PC 1.00

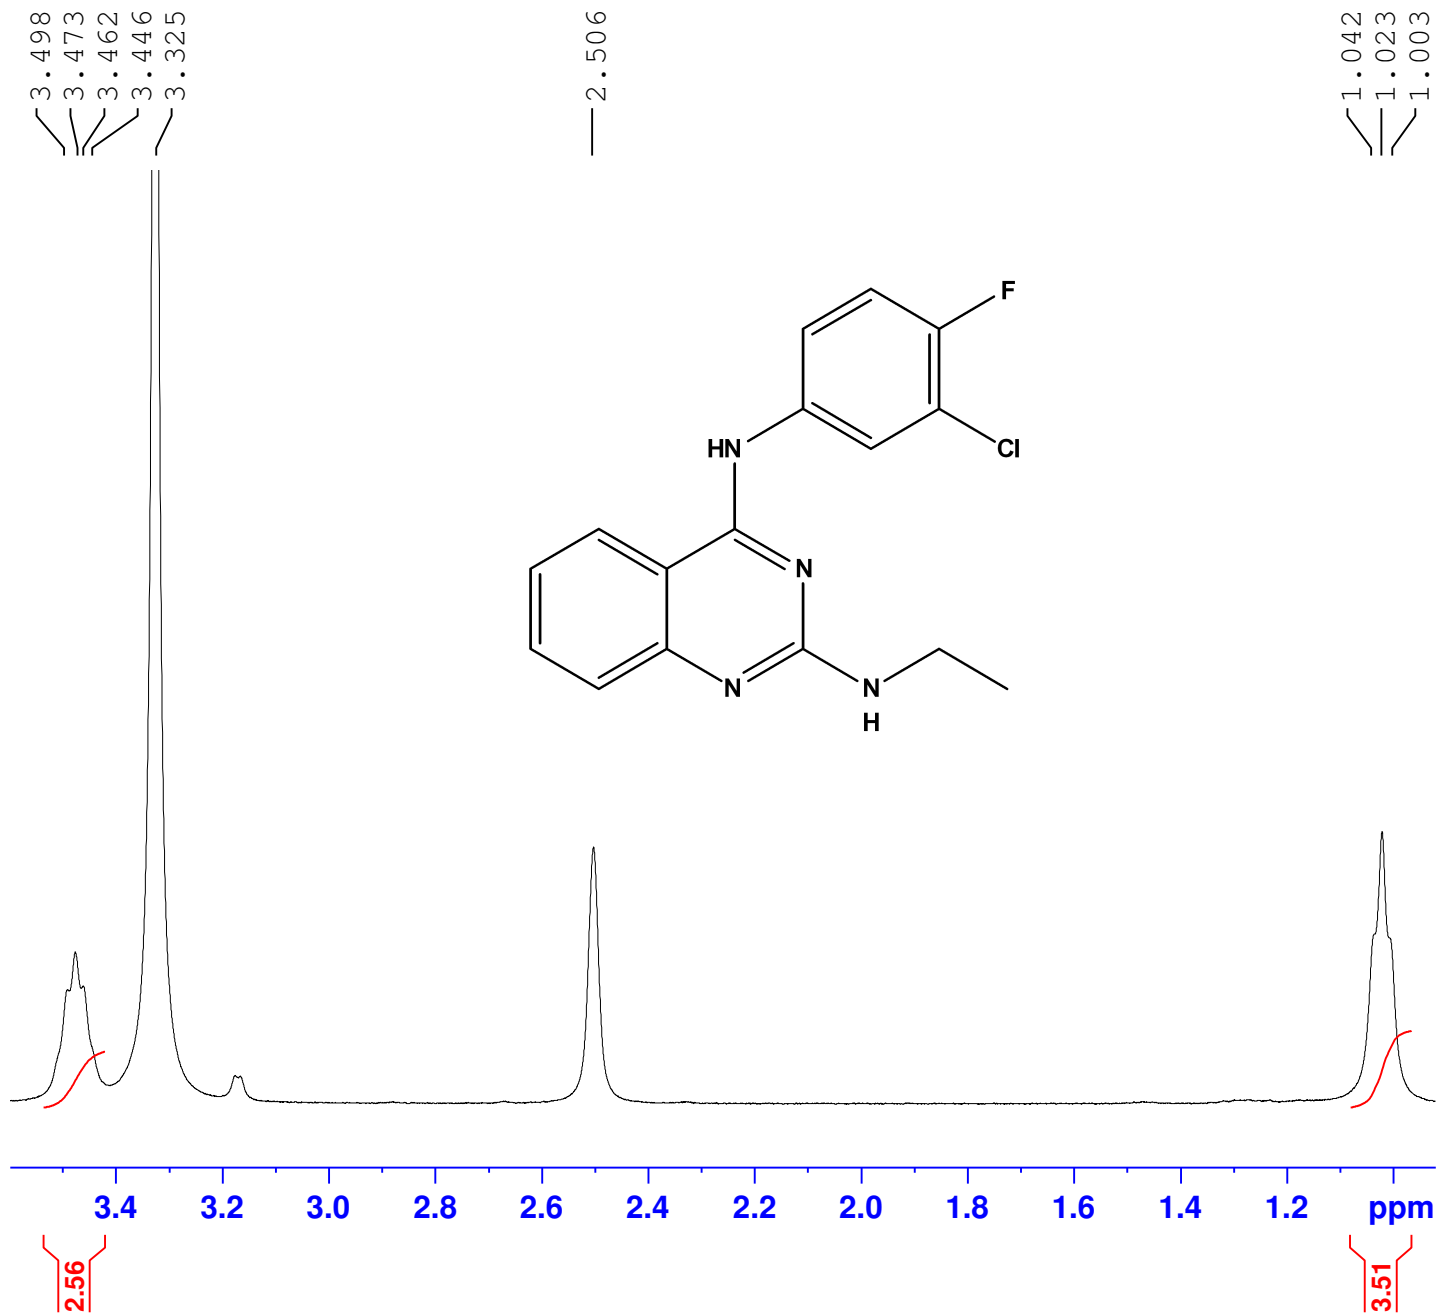

Current Data Parameters  
 NAME albraa-AR9  
 EXPNO 1  
 PROCNO 1

F2 - Acquisition Parameters  
 Date\_ 20210225  
 Time 11.40  
 INSTRUM spect  
 PROBHD 5 mm PABBO BB/  
 PULPROG zg30  
 TD 65536  
 SOLVENT DMSO  
 NS 119  
 DS 2  
 SWH 8012.820 Hz  
 FIDRES 0.122266 Hz  
 AQ 4.0894465 sec  
 RG 205.37  
 DW 62.400 usec  
 DE 6.50 usec  
 TE 300.0 K  
 D1 1.00000000 sec  
 TD0 1

===== CHANNEL f1 =====  
 SFO1 400.1524711 MHz  
 NUC1 1H  
 P1 12.00 usec  
 PLW1 18.00000000 W

F2 - Processing parameters  
 SI 65536  
 SF 400.1500000 MHz  
 WDW EM  
 SSB 0  
 LB 0.30 Hz  
 GB 0  
 PC 1.00

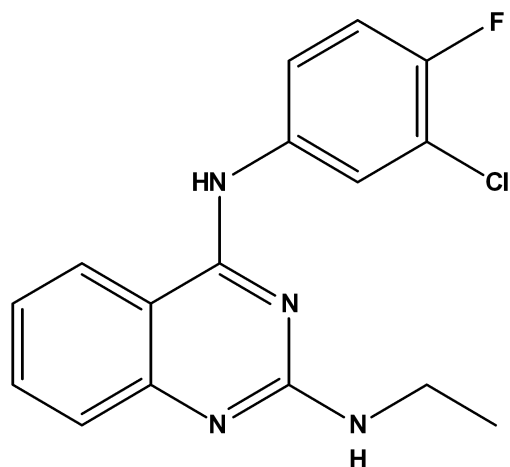

8.298  
8.167  
8.041  
7.673  
7.440  
7.334  
7.295

3.795  
3.437  
2.516  
0.994

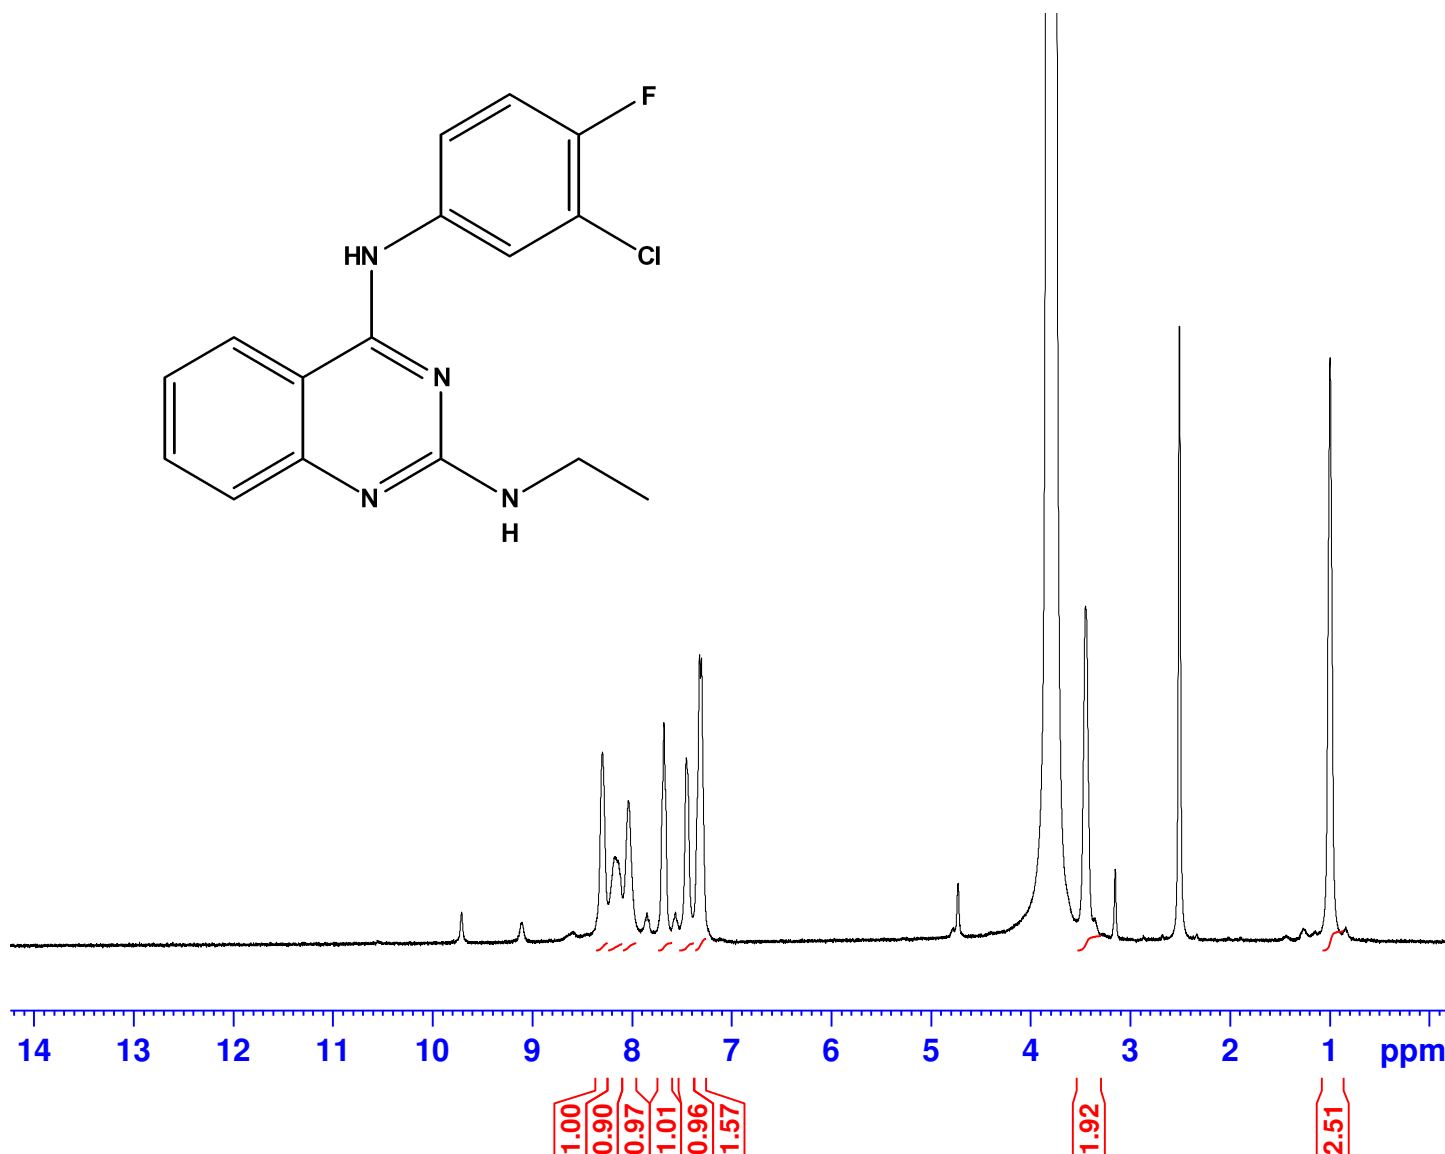

Current Data Parameters  
NAME albraa-AR9-d2o  
EXPNO 1  
PROCNO 1

F2 - Acquisition Parameters  
Date\_ 20210228  
Time 11.46  
INSTRUM spect  
PROBHD 5 mm PABBO BB/  
PULPROG zg30  
TD 65536  
SOLVENT DMSO  
NS 128  
DS 2  
SWH 8012.820 Hz  
FIDRES 0.122266 Hz  
AQ 4.0894465 sec  
RG 205.37  
DW 62.400 usec  
DE 6.50 usec  
TE 300.0 K  
D1 1.00000000 sec  
TD0 1

===== CHANNEL f1 =====  
SFO1 400.1524711 MHz  
NUC1 1H  
P1 12.00 usec  
PLW1 18.00000000 W

F2 - Processing parameters  
SI 65536  
SF 400.1500000 MHz  
WDW EM  
SSB 0  
LB 0.30 Hz  
GB 0  
PC 1.00

Hazem ElQady\_C\_AR-15.10.fid  
Hazem ElQady\_C\_AR-15

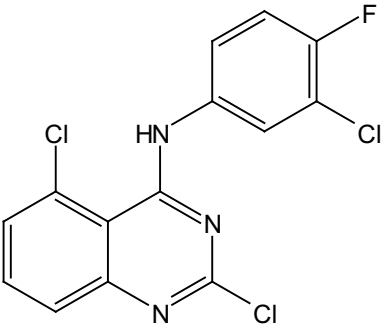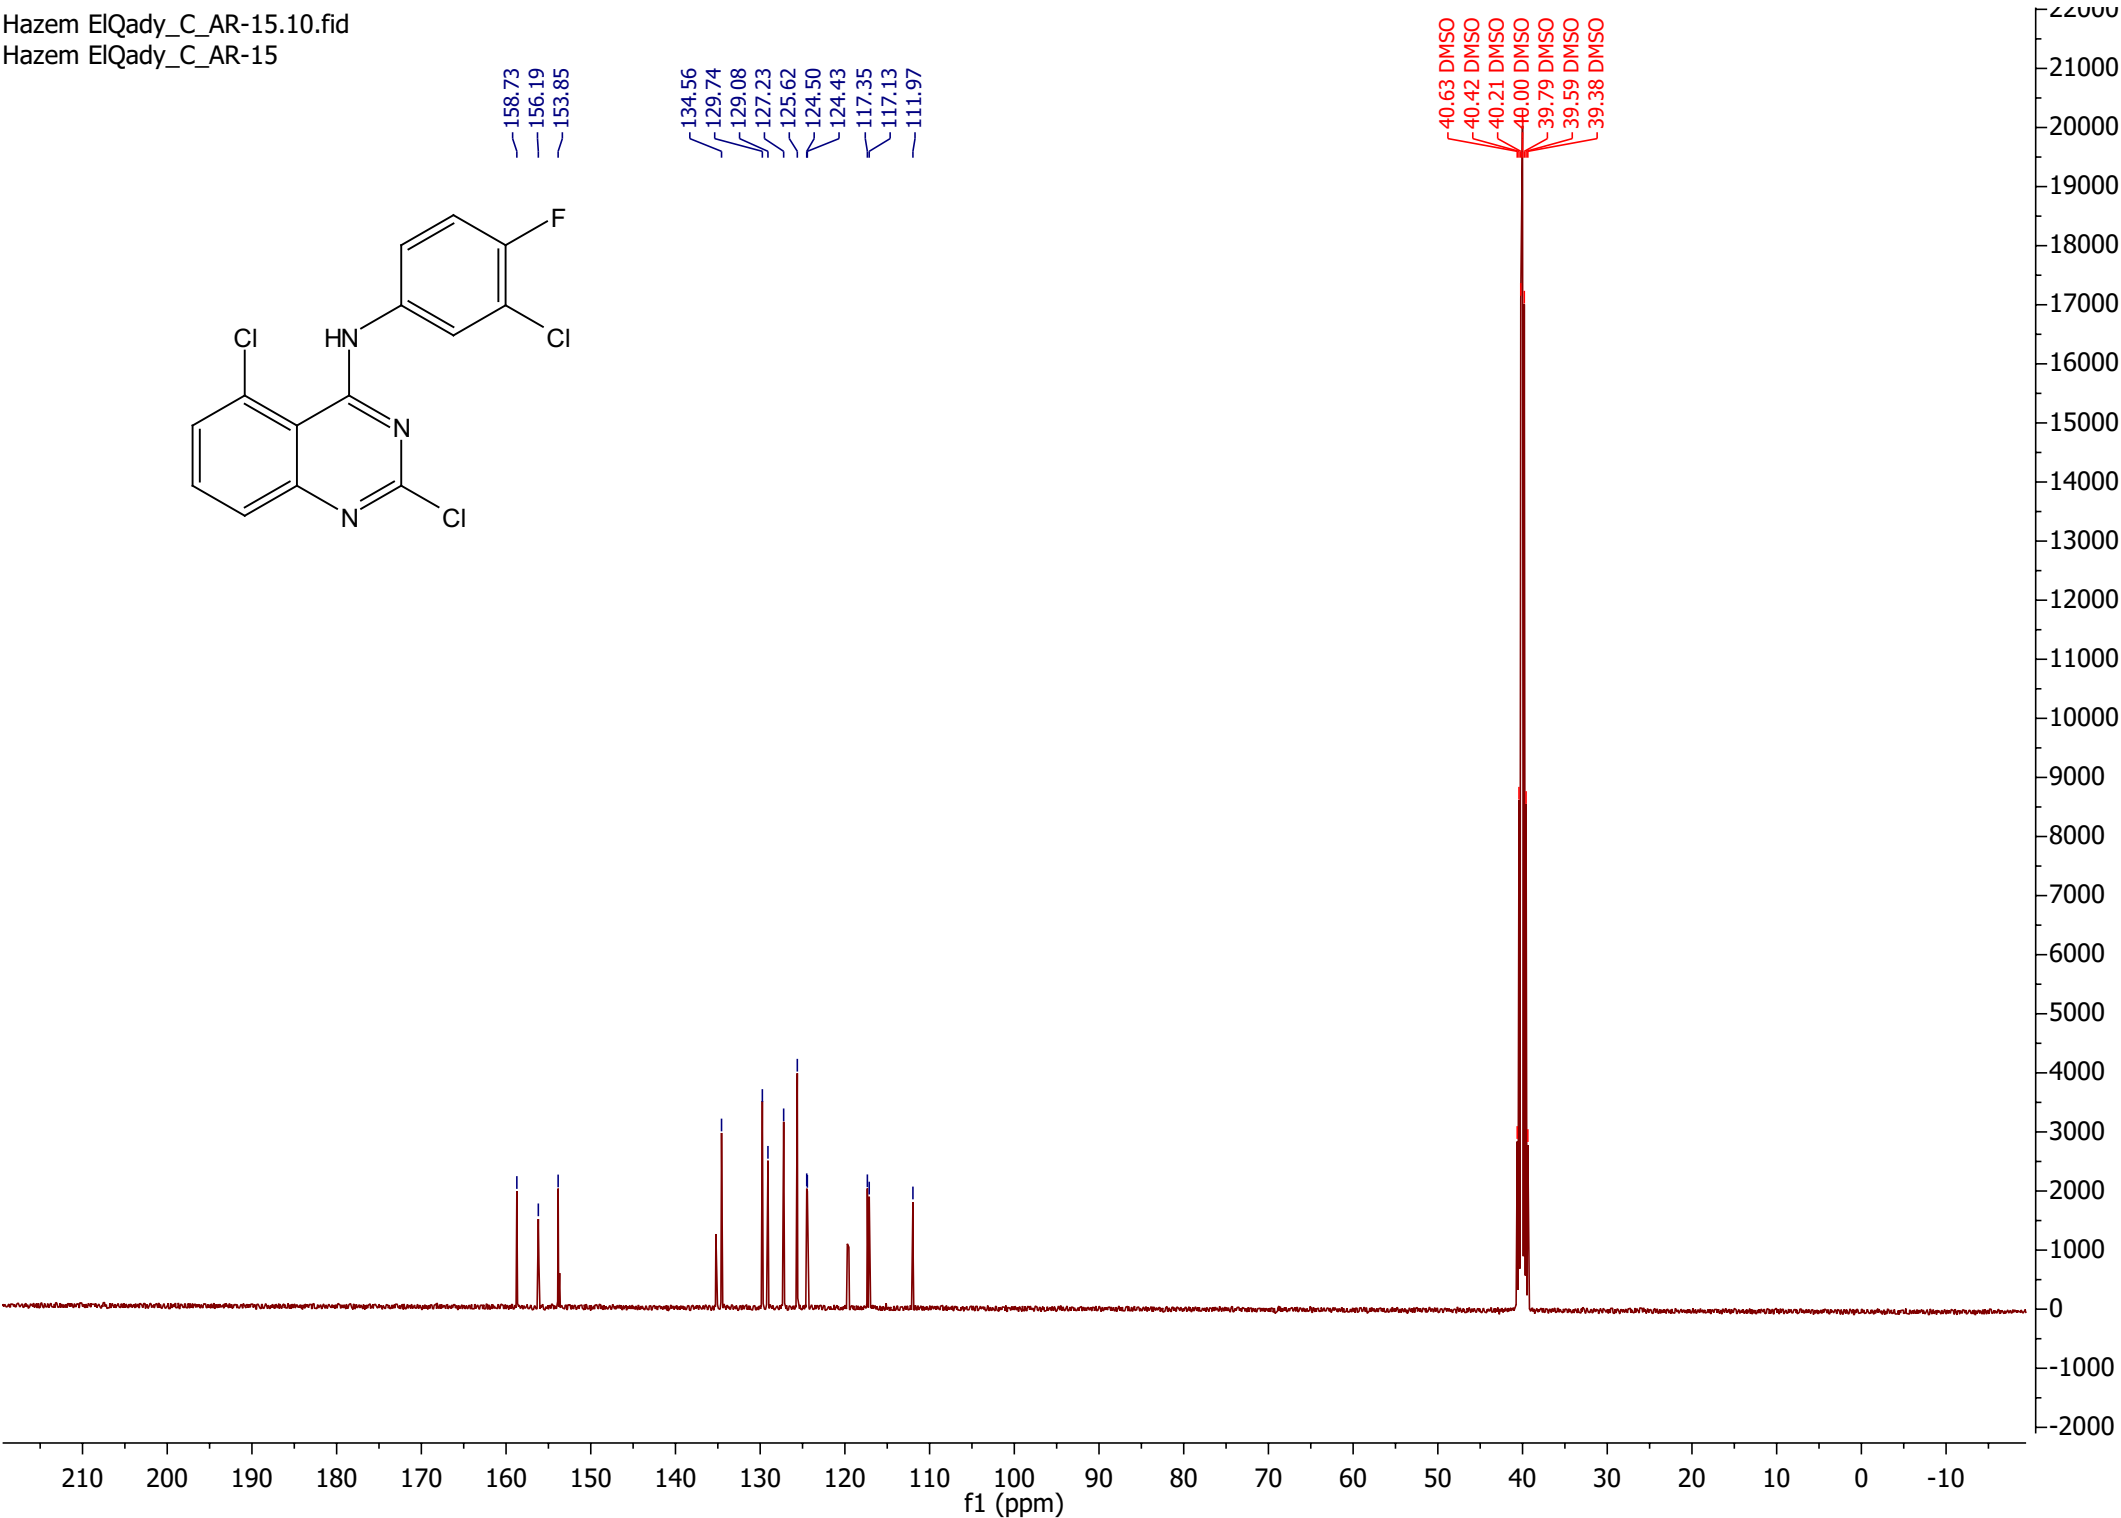

Hazem ElQady\_C\_AR-15.10.fid  
Hazem ElQady\_C\_AR-15

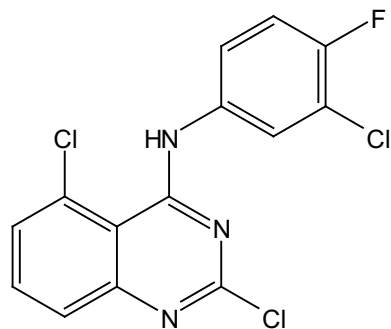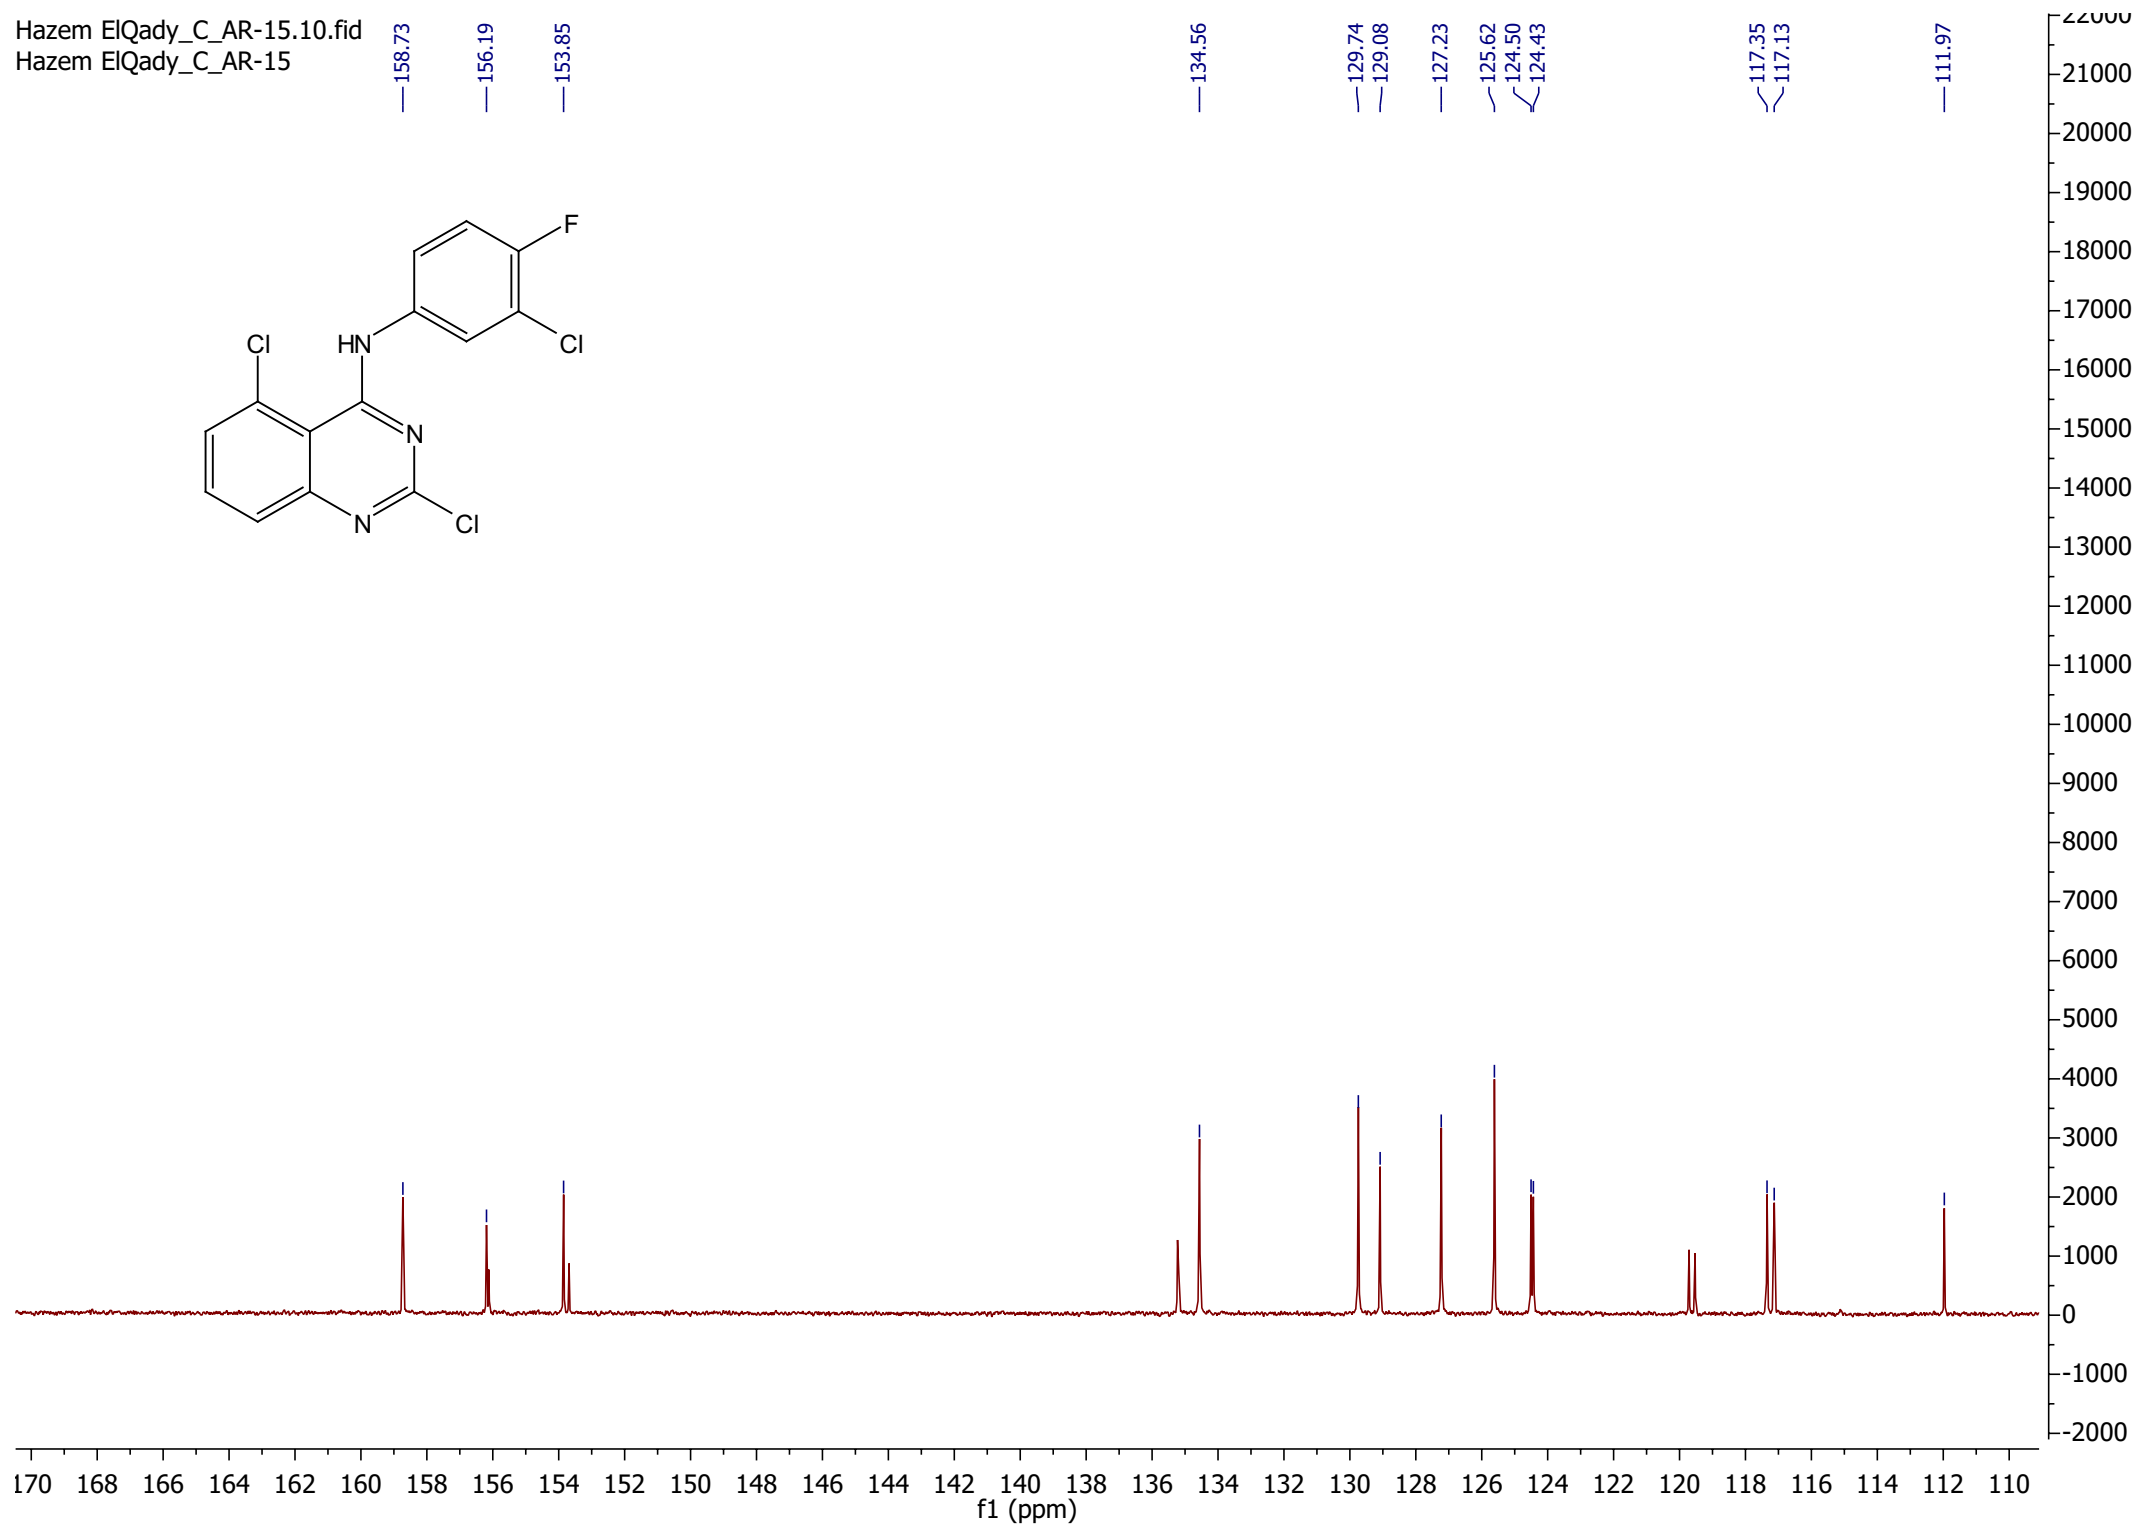



Current Data Parameters  
NAME albraa-ibrahim-H4  
EXPNO 1  
PROCNO 1

F2 - Acquisition Parameters  
Date\_ 20210401  
Time 13.57  
INSTRUM spect  
PROBHD 5 mm PABBO BB/  
PULPROG zg30  
TD 65536  
SOLVENT DMSO  
NS 32  
DS 2  
SWH 8012.820 Hz  
FIDRES 0.122266 Hz  
AQ 4.0894465 sec  
RG 205.37  
DW 62.400 usec  
DE 6.50 usec  
TE 300.0 K  
D1 1.00000000 sec  
TD0 1

===== CHANNEL f1 =====  
SFO1 400.1524711 MHz  
NUC1 1H  
P1 12.00 usec  
PLW1 18.00000000 W

F2 - Processing parameters  
SI 65536  
SF 400.1500000 MHz  
WDW EM  
SSB 0  
LB 0.30 Hz  
GB 0  
PC 1.00

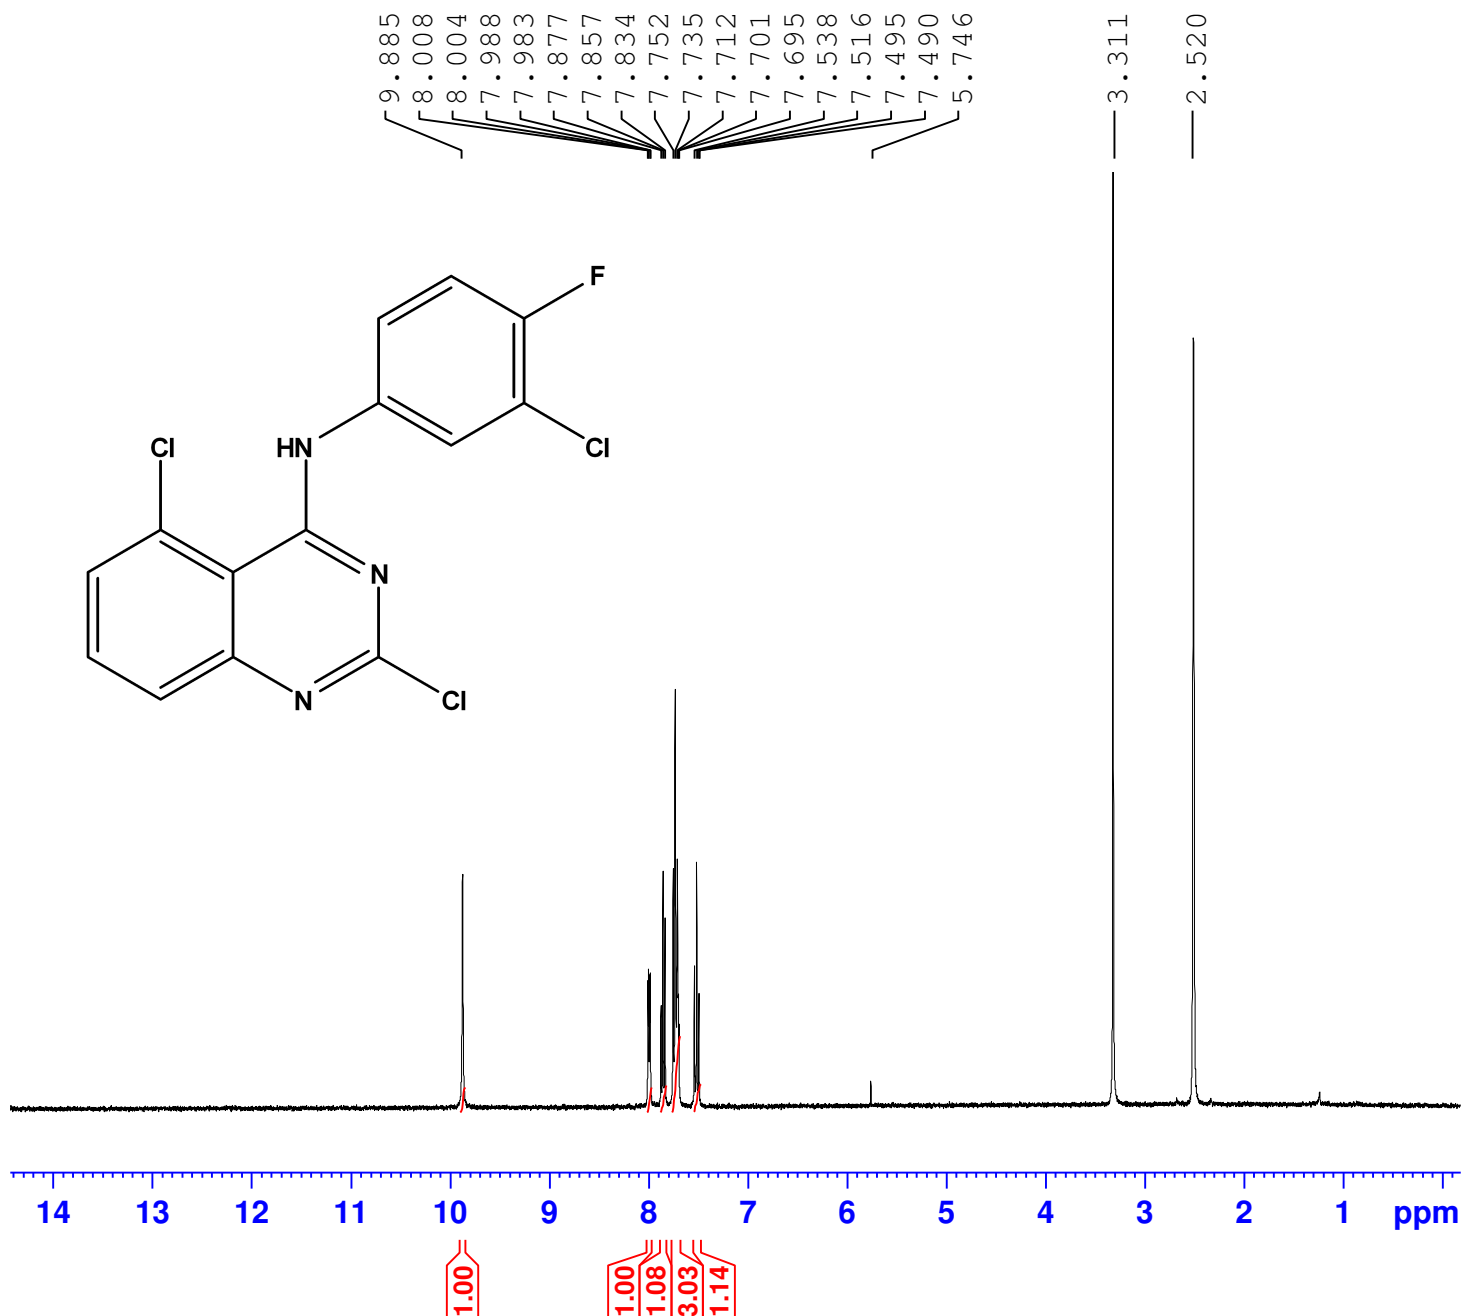



Current Data Parameters  
 NAME albraa-ibrahim-H4  
 EXPNO 1  
 PROCNO 1

F2 - Acquisition Parameters  
 Date\_ 20210401  
 Time 13.57  
 INSTRUM spect  
 PROBHD 5 mm PABBO BB/  
 PULPROG zg30  
 TD 65536  
 SOLVENT DMSO  
 NS 32  
 DS 2  
 SWH 8012.820 Hz  
 FIDRES 0.122266 Hz  
 AQ 4.0894465 sec  
 RG 205.37  
 DW 62.400 usec  
 DE 6.50 usec  
 TE 300.0 K  
 D1 1.00000000 sec  
 TD0 1

===== CHANNEL f1 =====  
 SFO1 400.1524711 MHz  
 NUC1 1H  
 P1 12.00 usec  
 PLW1 18.00000000 W

F2 - Processing parameters  
 SI 65536  
 SF 400.1500000 MHz  
 WDW EM  
 SSB 0  
 LB 0.30 Hz  
 GB 0  
 PC 1.00

8.008  
8.004  
7.988  
7.983

7.877  
7.857  
7.834

7.752  
7.735  
7.712  
7.701  
7.695

7.538  
7.516  
7.495  
7.490

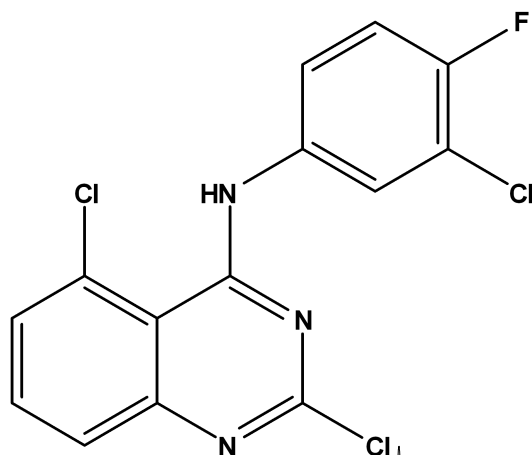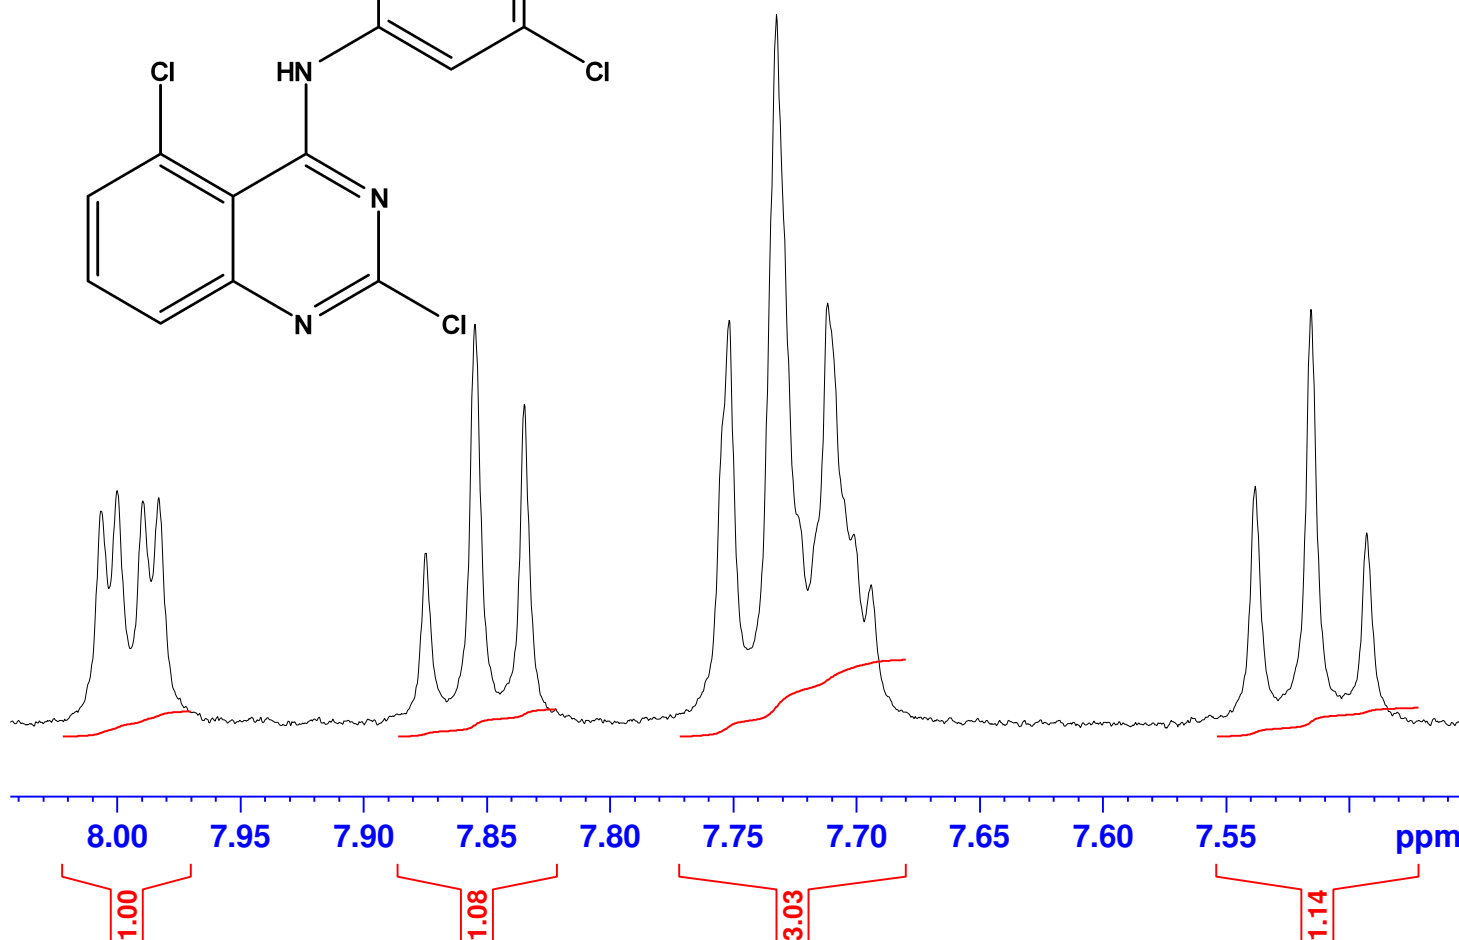

13C NMR of 11a

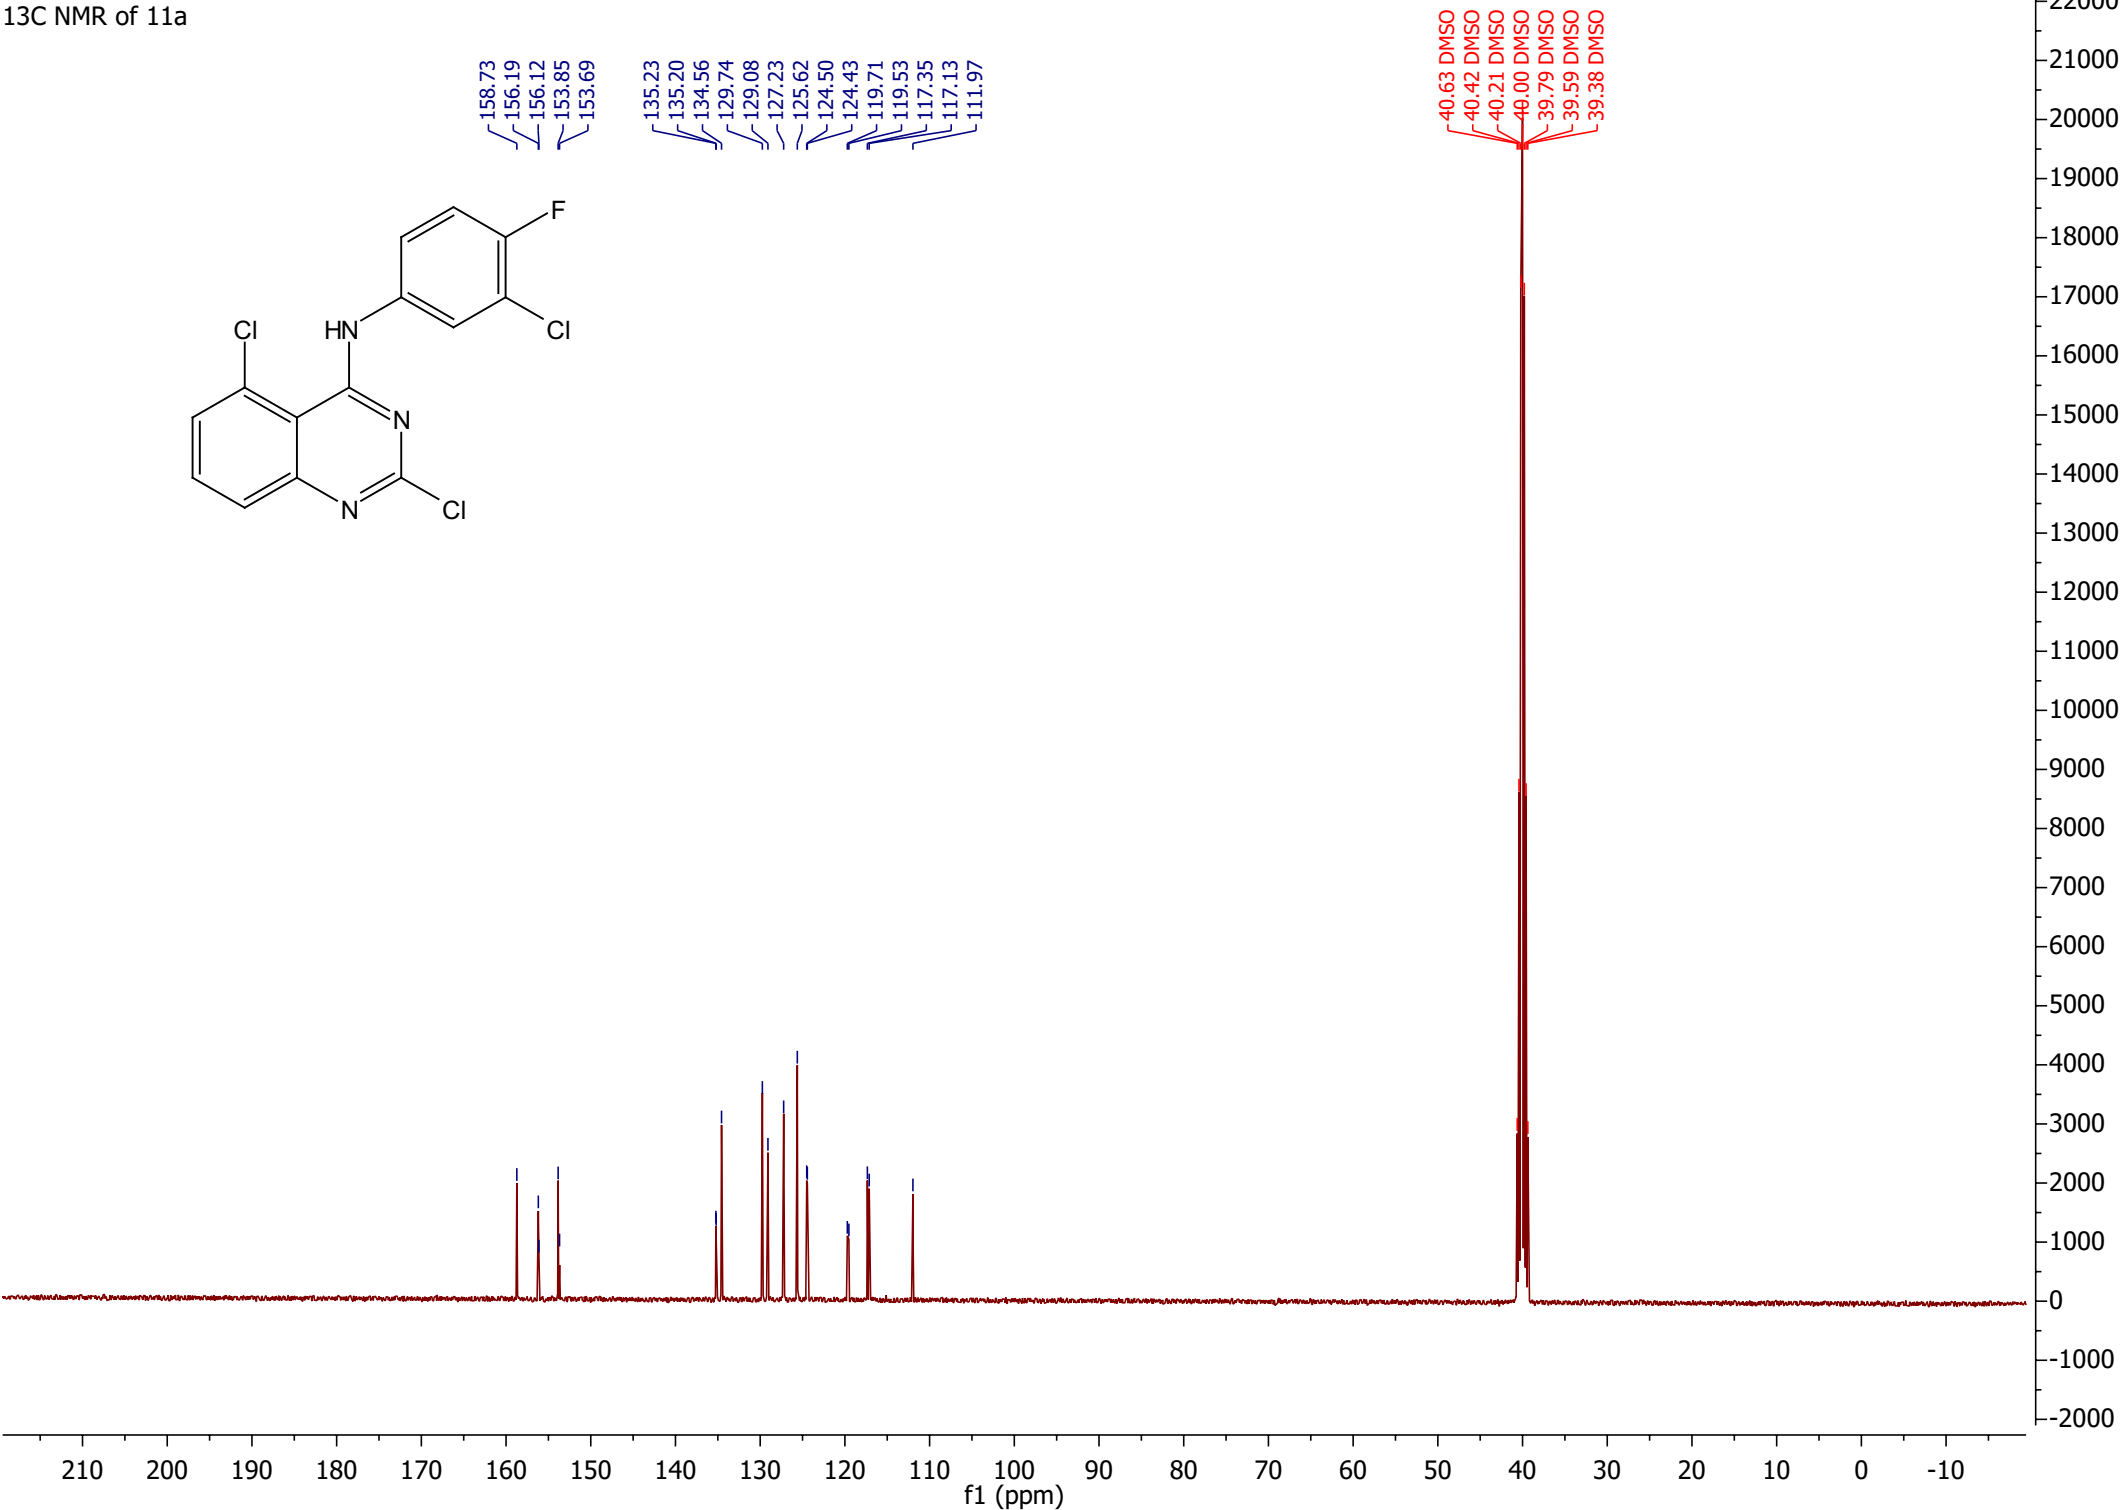

<sup>13</sup>C NMR of 11a



135.23  
135.20  
134.56

129.74

129.08

127.23

125.62

124.50

124.43

119.71

119.53

117.35

117.13

111.97

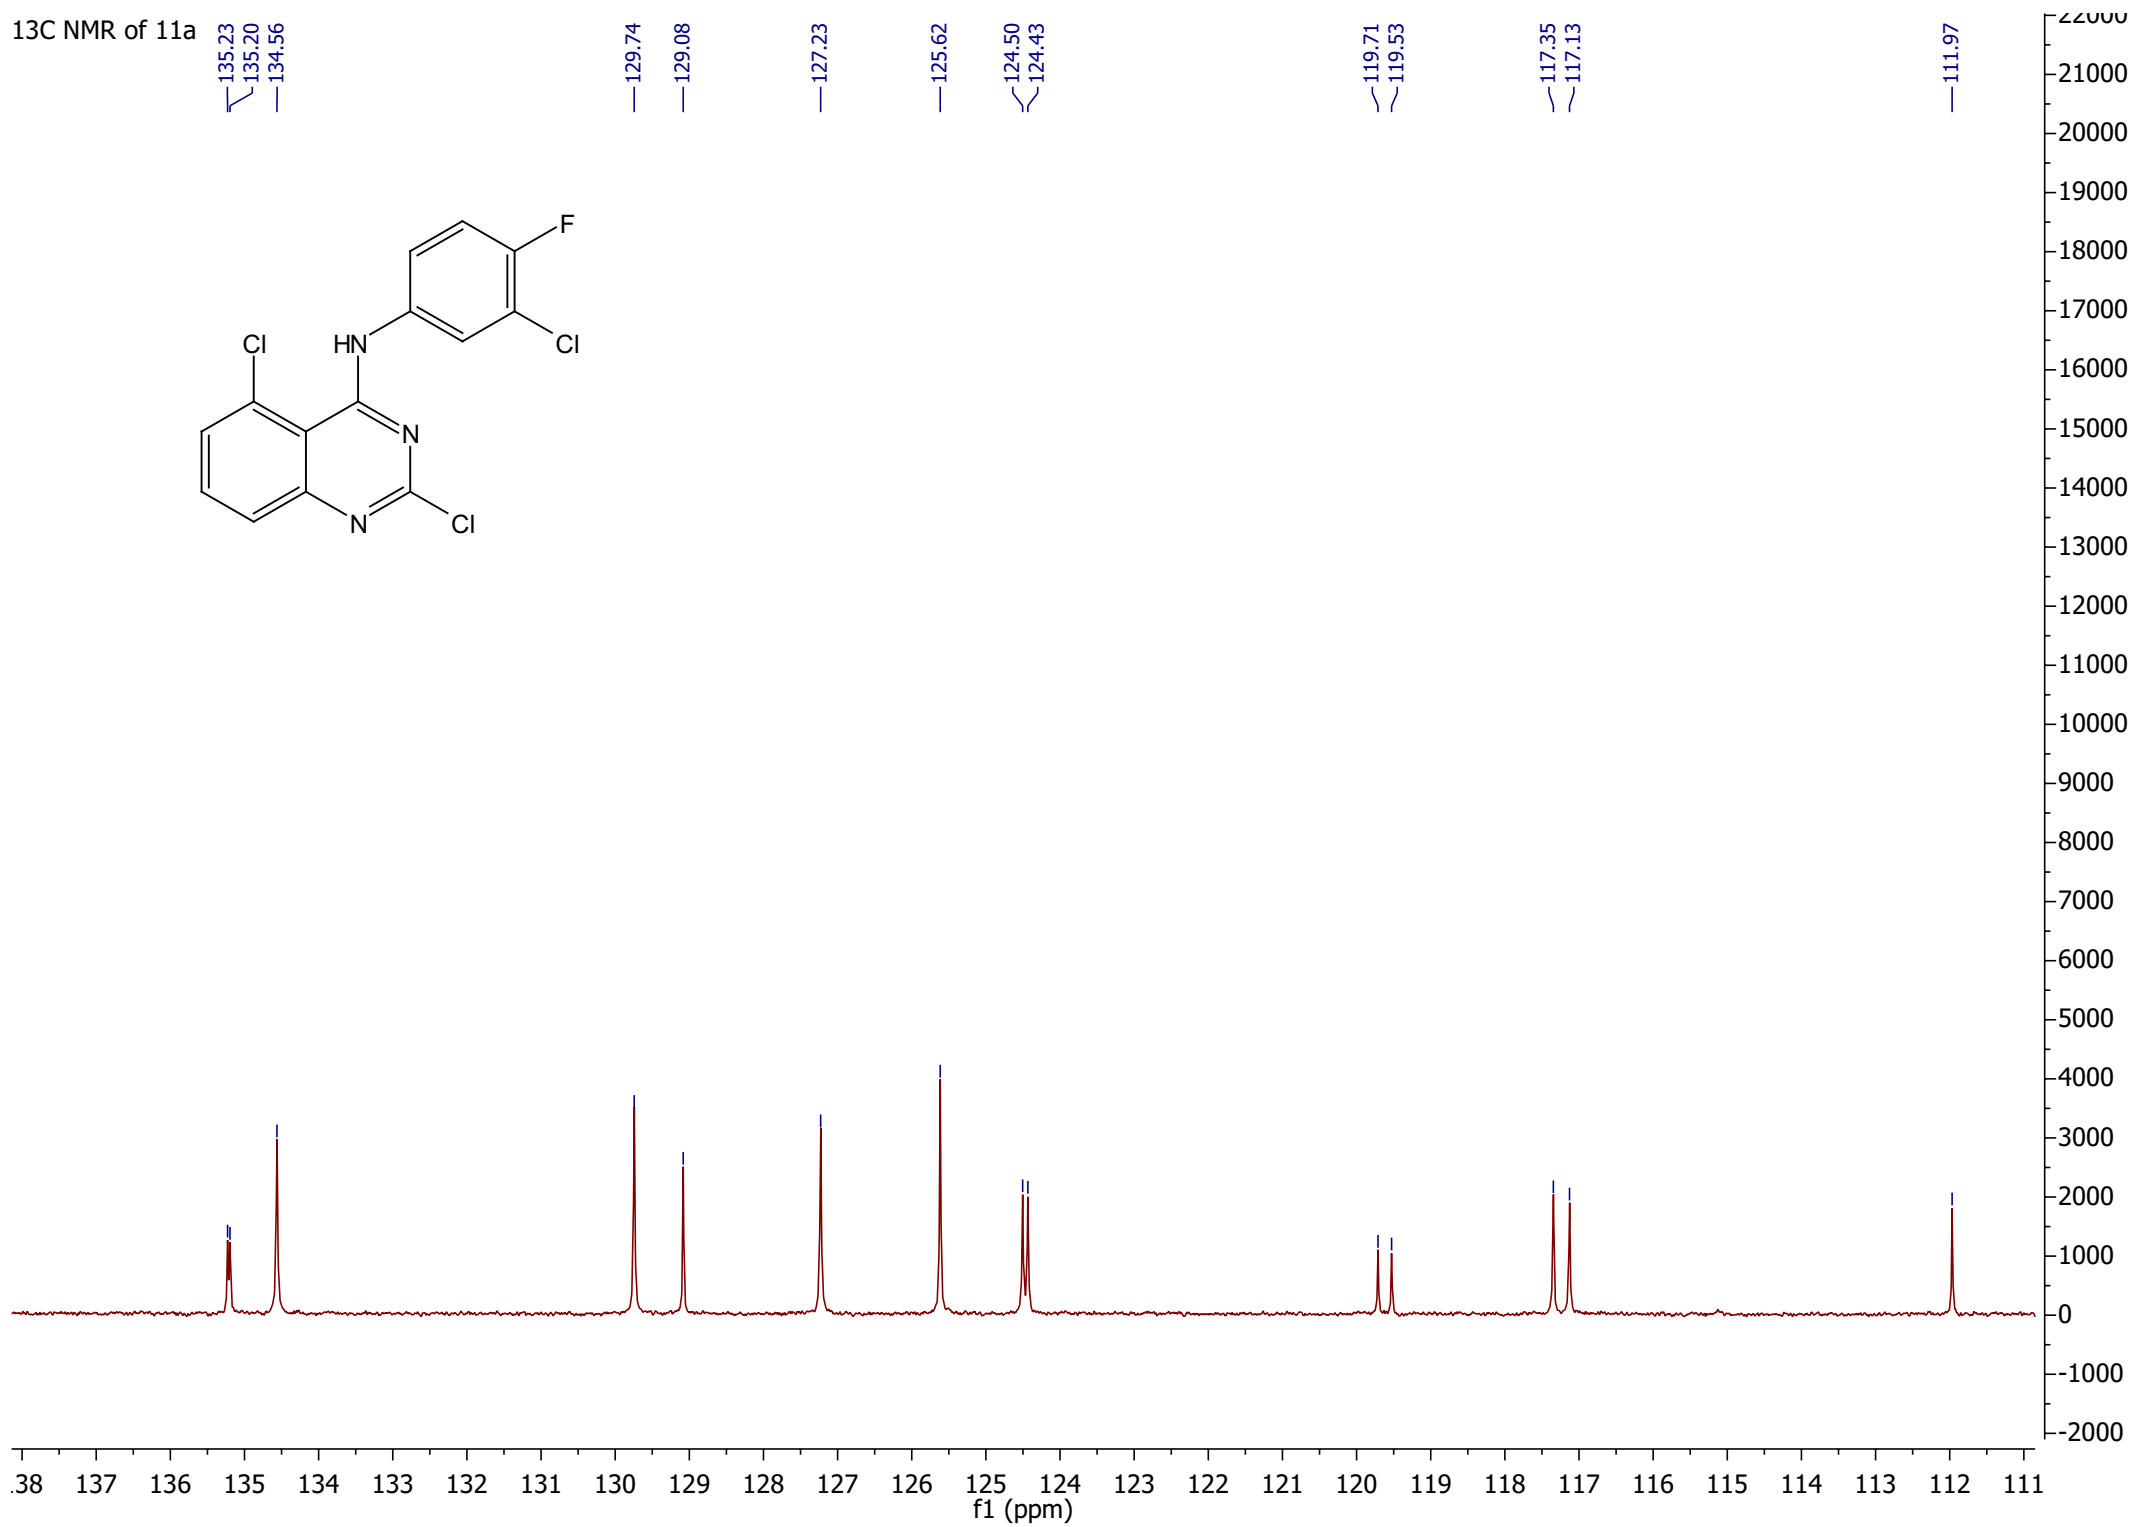

<sup>13</sup>C NMR of 11b

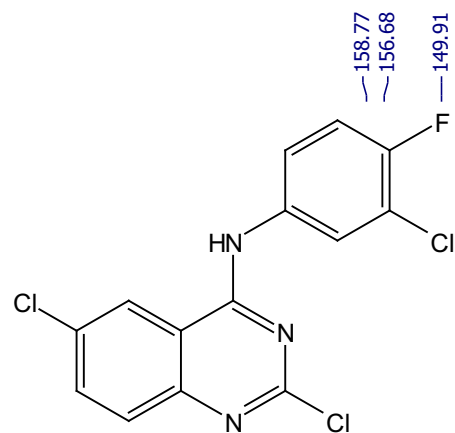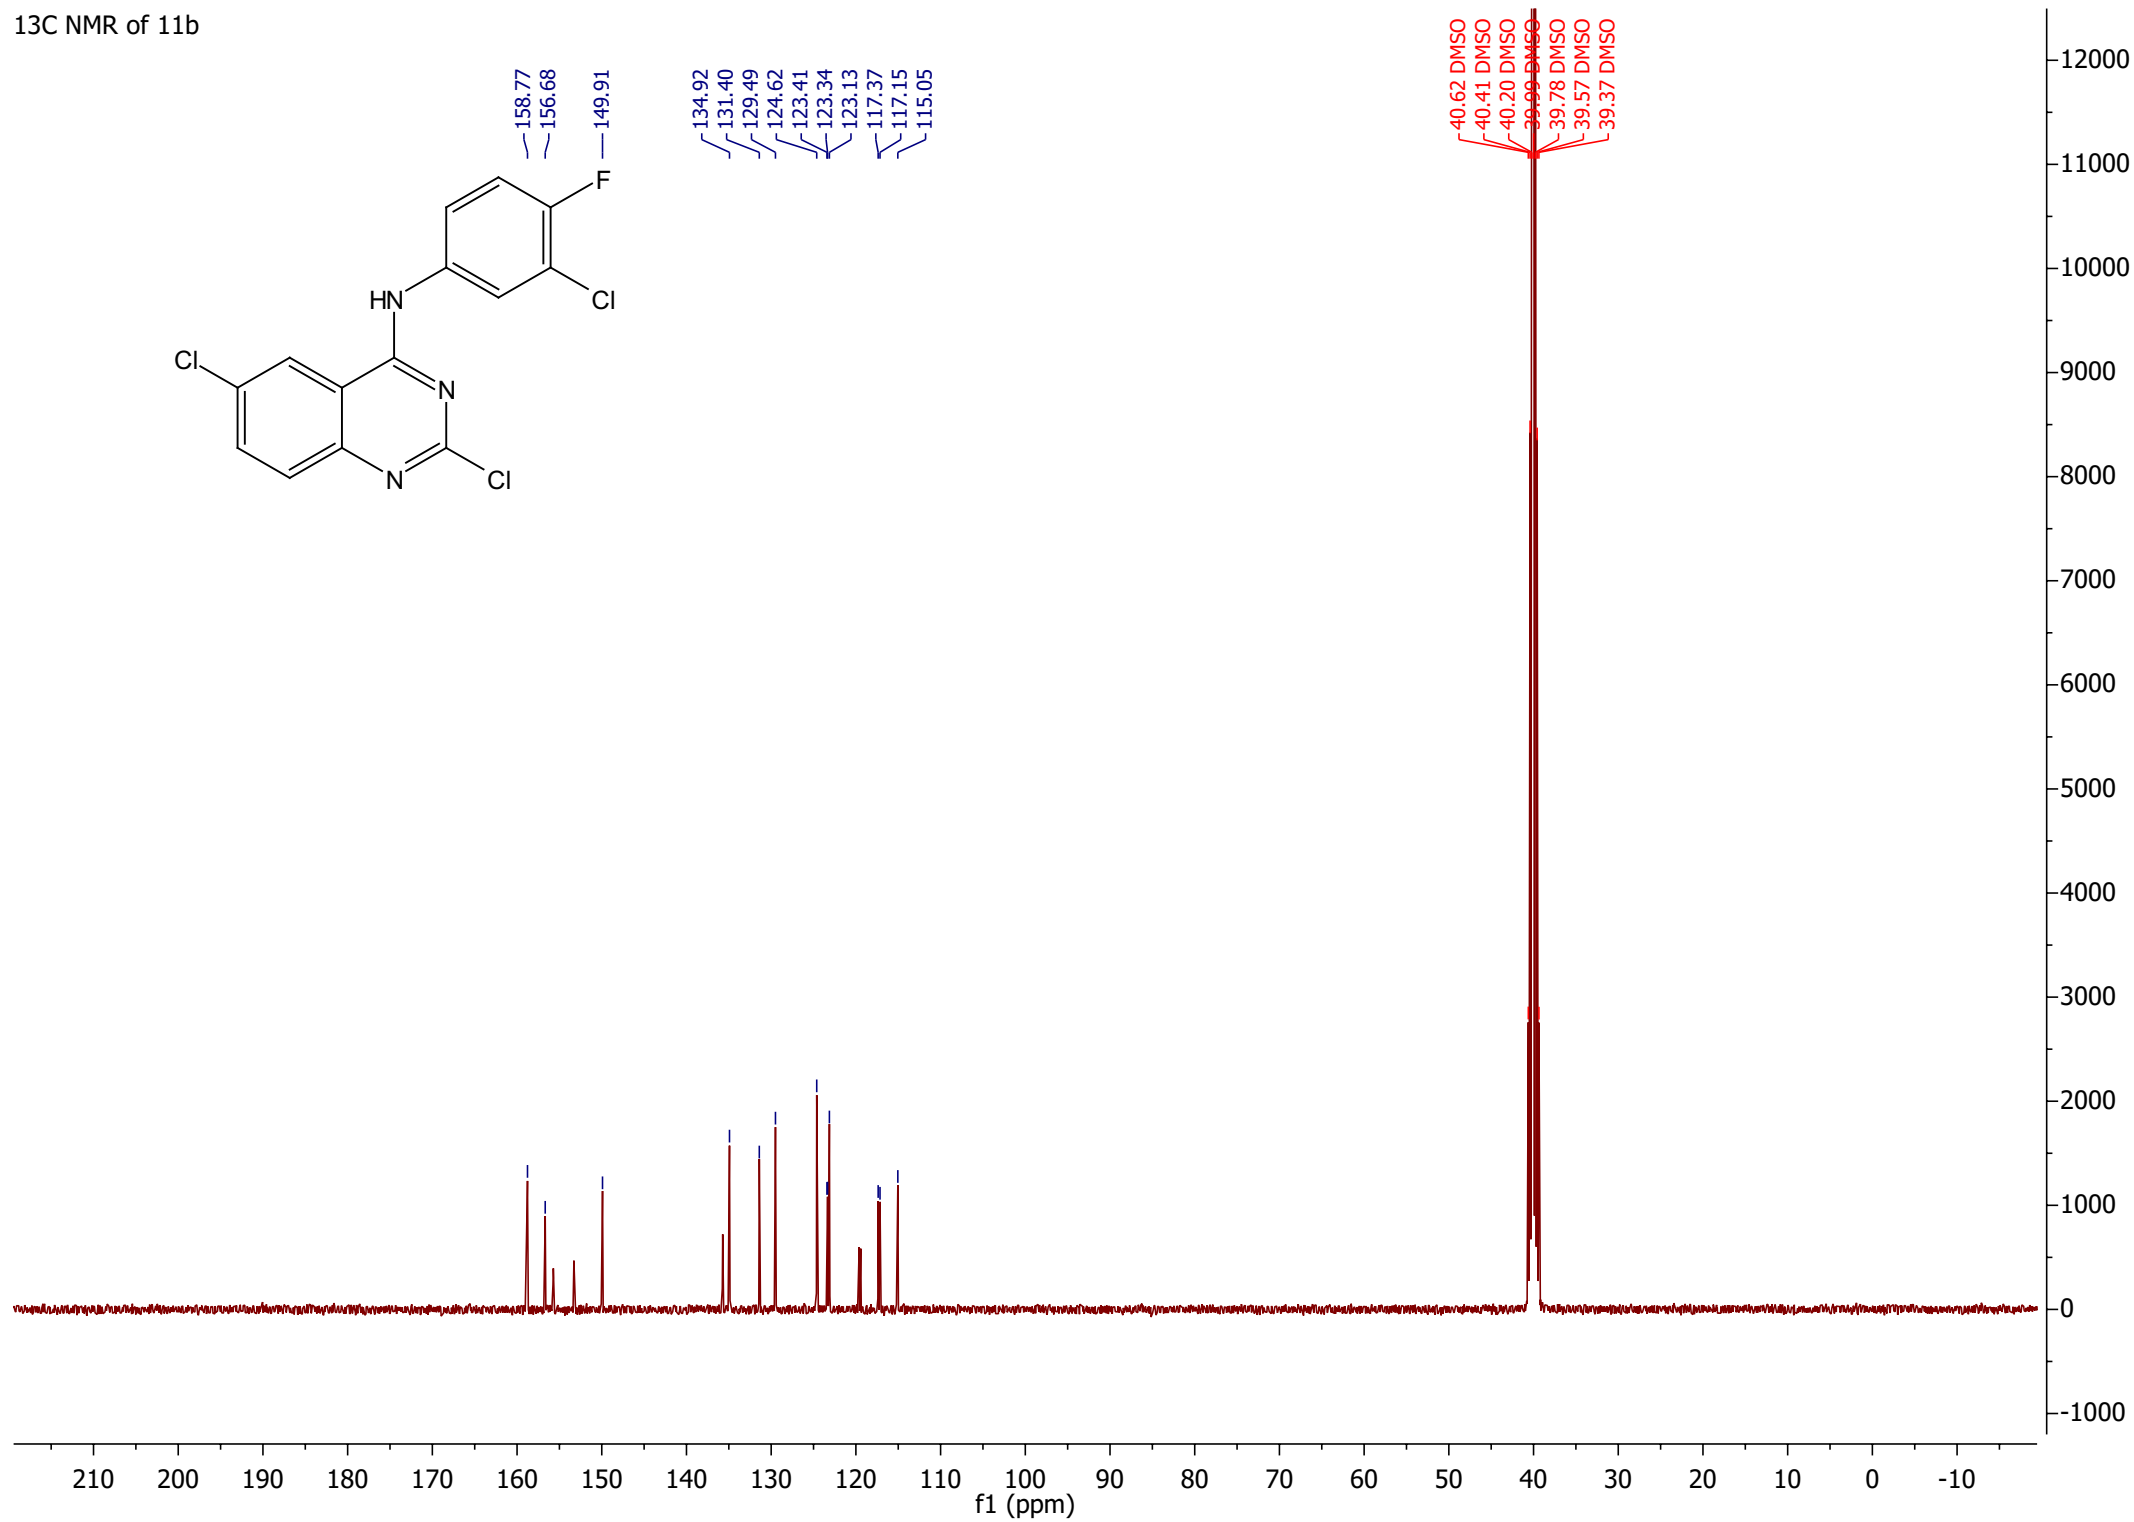

13C NMR of 11b

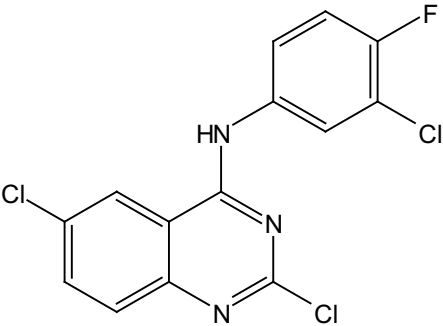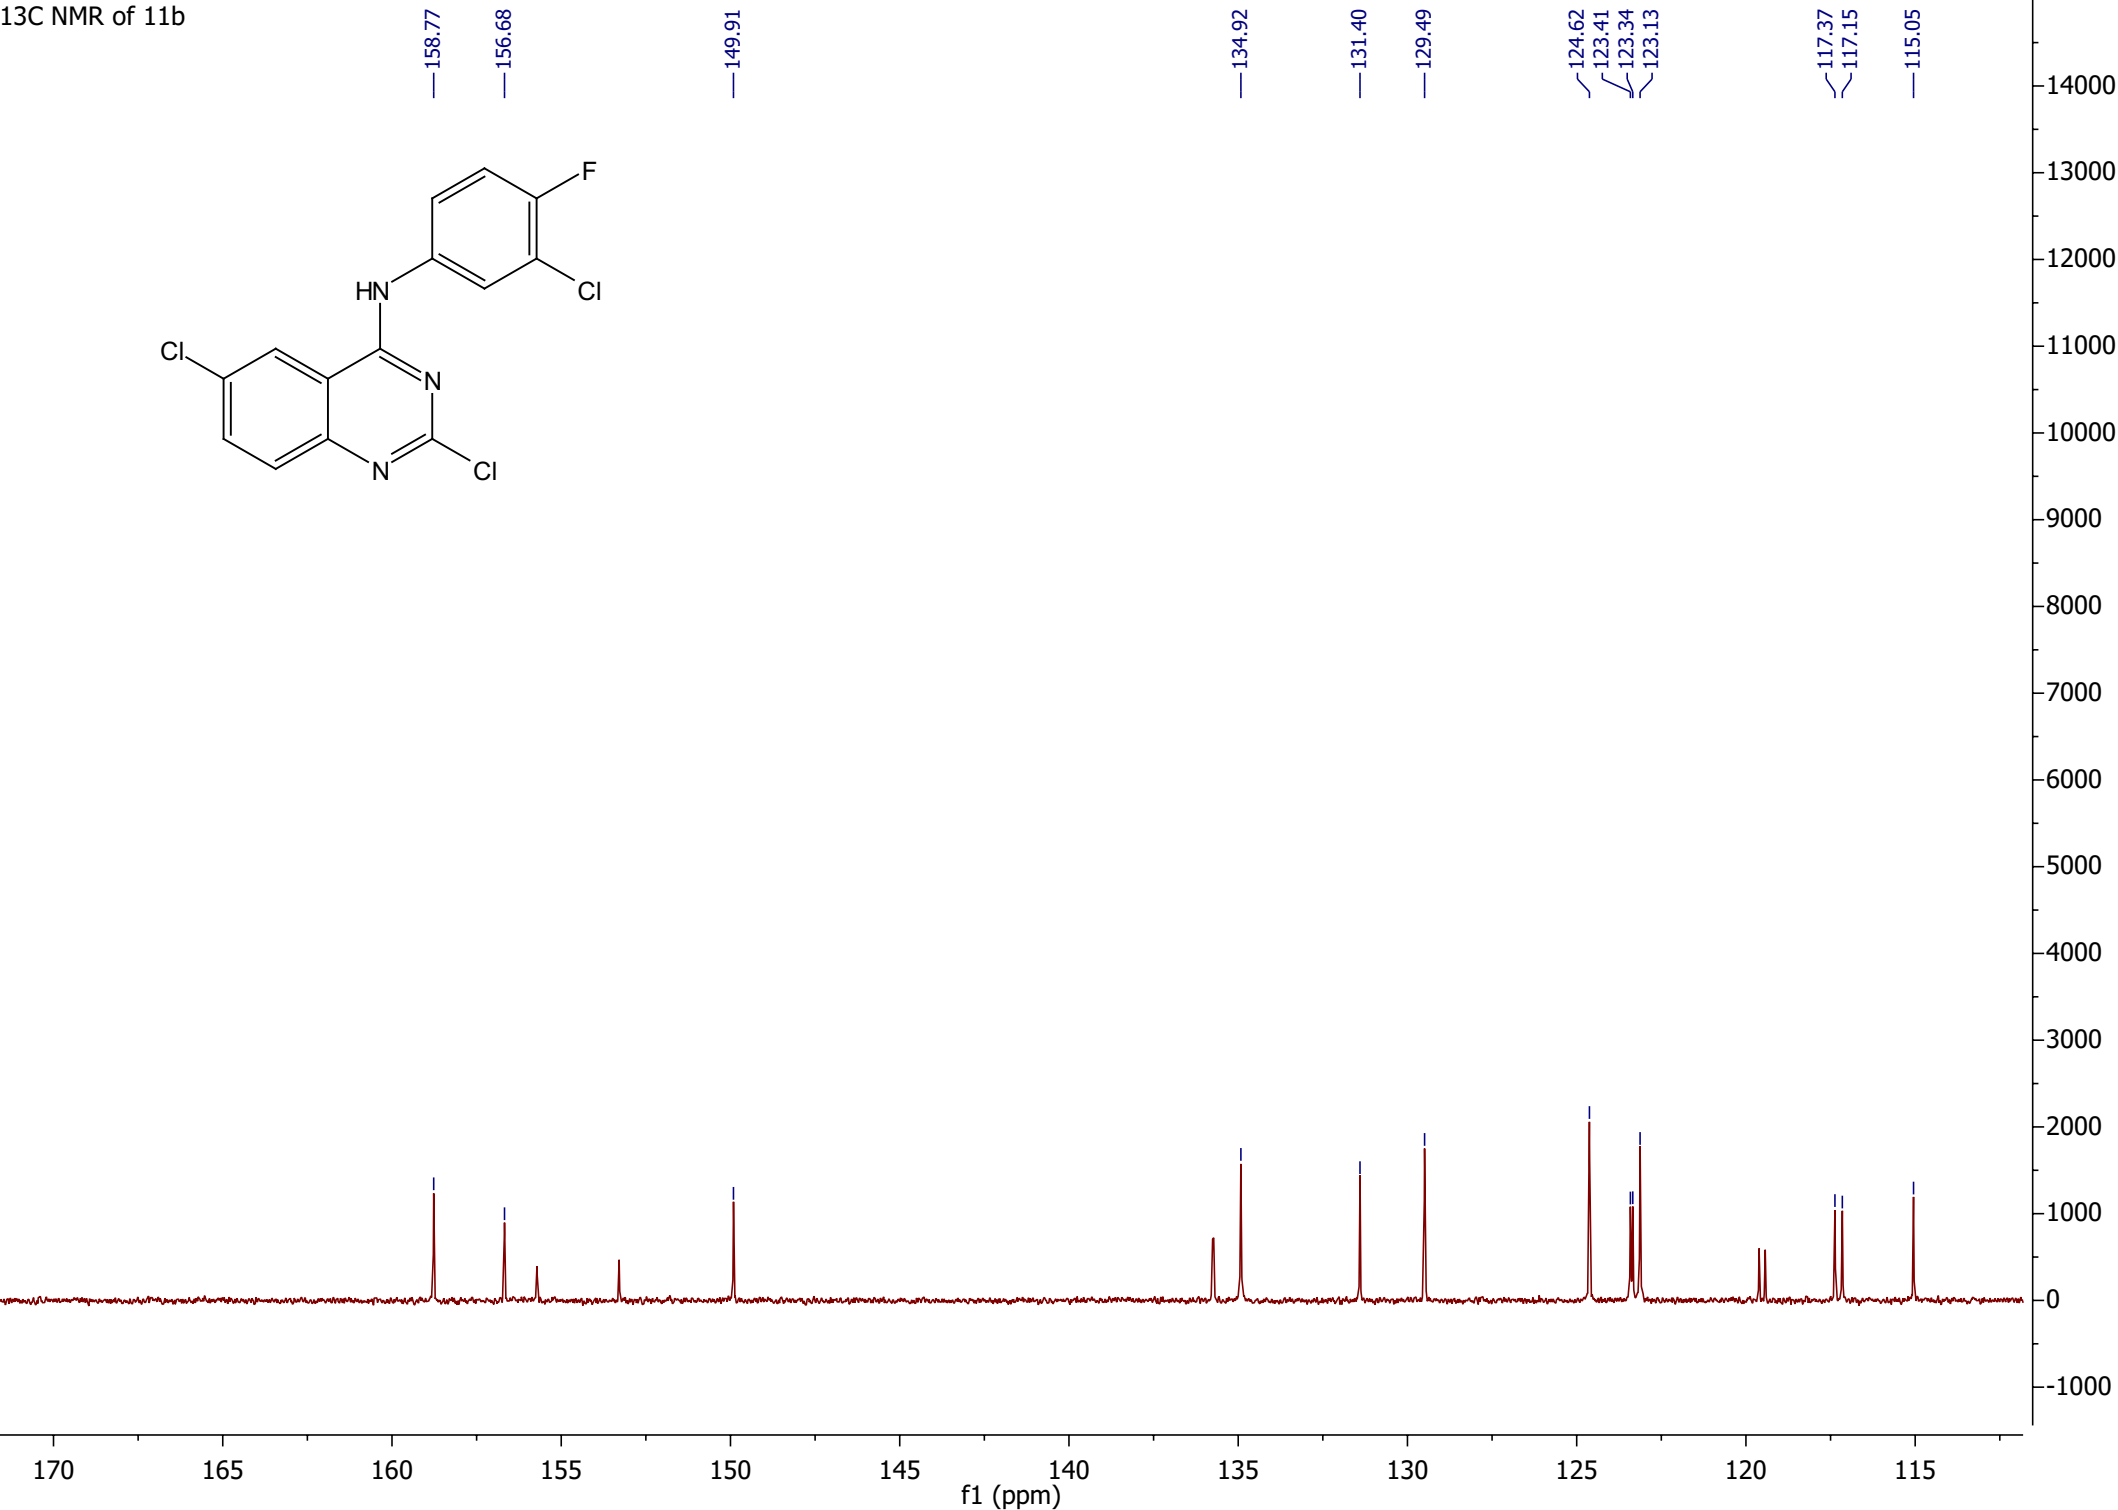



Current Data Parameters  
NAME anas-ramadan-h2-3  
EXPNO 1  
PROCNO 1

F2 - Acquisition Parameters  
Date\_ 20210401  
Time 13.51  
INSTRUM spect  
PROBHD 5 mm PABBO BB/  
PULPROG zg30  
TD 65536  
SOLVENT DMSO  
NS 41  
DS 2  
SWH 8012.820 Hz  
FIDRES 0.122266 Hz  
AQ 4.0894465 sec  
RG 205.37  
DW 62.400 usec  
DE 6.50 usec  
TE 300.0 K  
D1 1.00000000 sec  
TD0 1

===== CHANNEL f1 =====  
SFO1 400.1524711 MHz  
NUC1 1H  
P1 12.00 usec  
PLW1 18.00000000 W

F2 - Processing parameters  
SI 65536  
SF 400.1500000 MHz  
WDW EM  
SSB 0  
LB 0.30 Hz  
GB 0  
PC 1.00

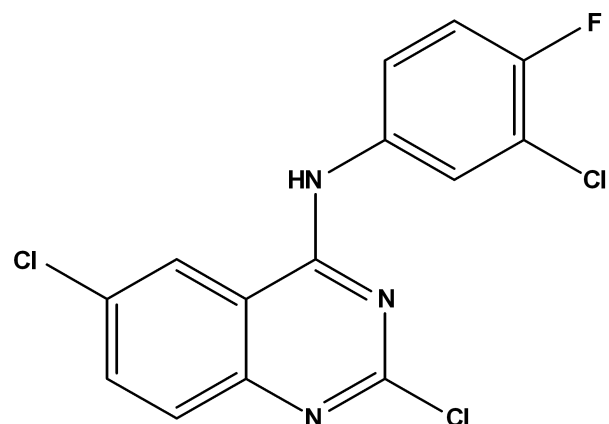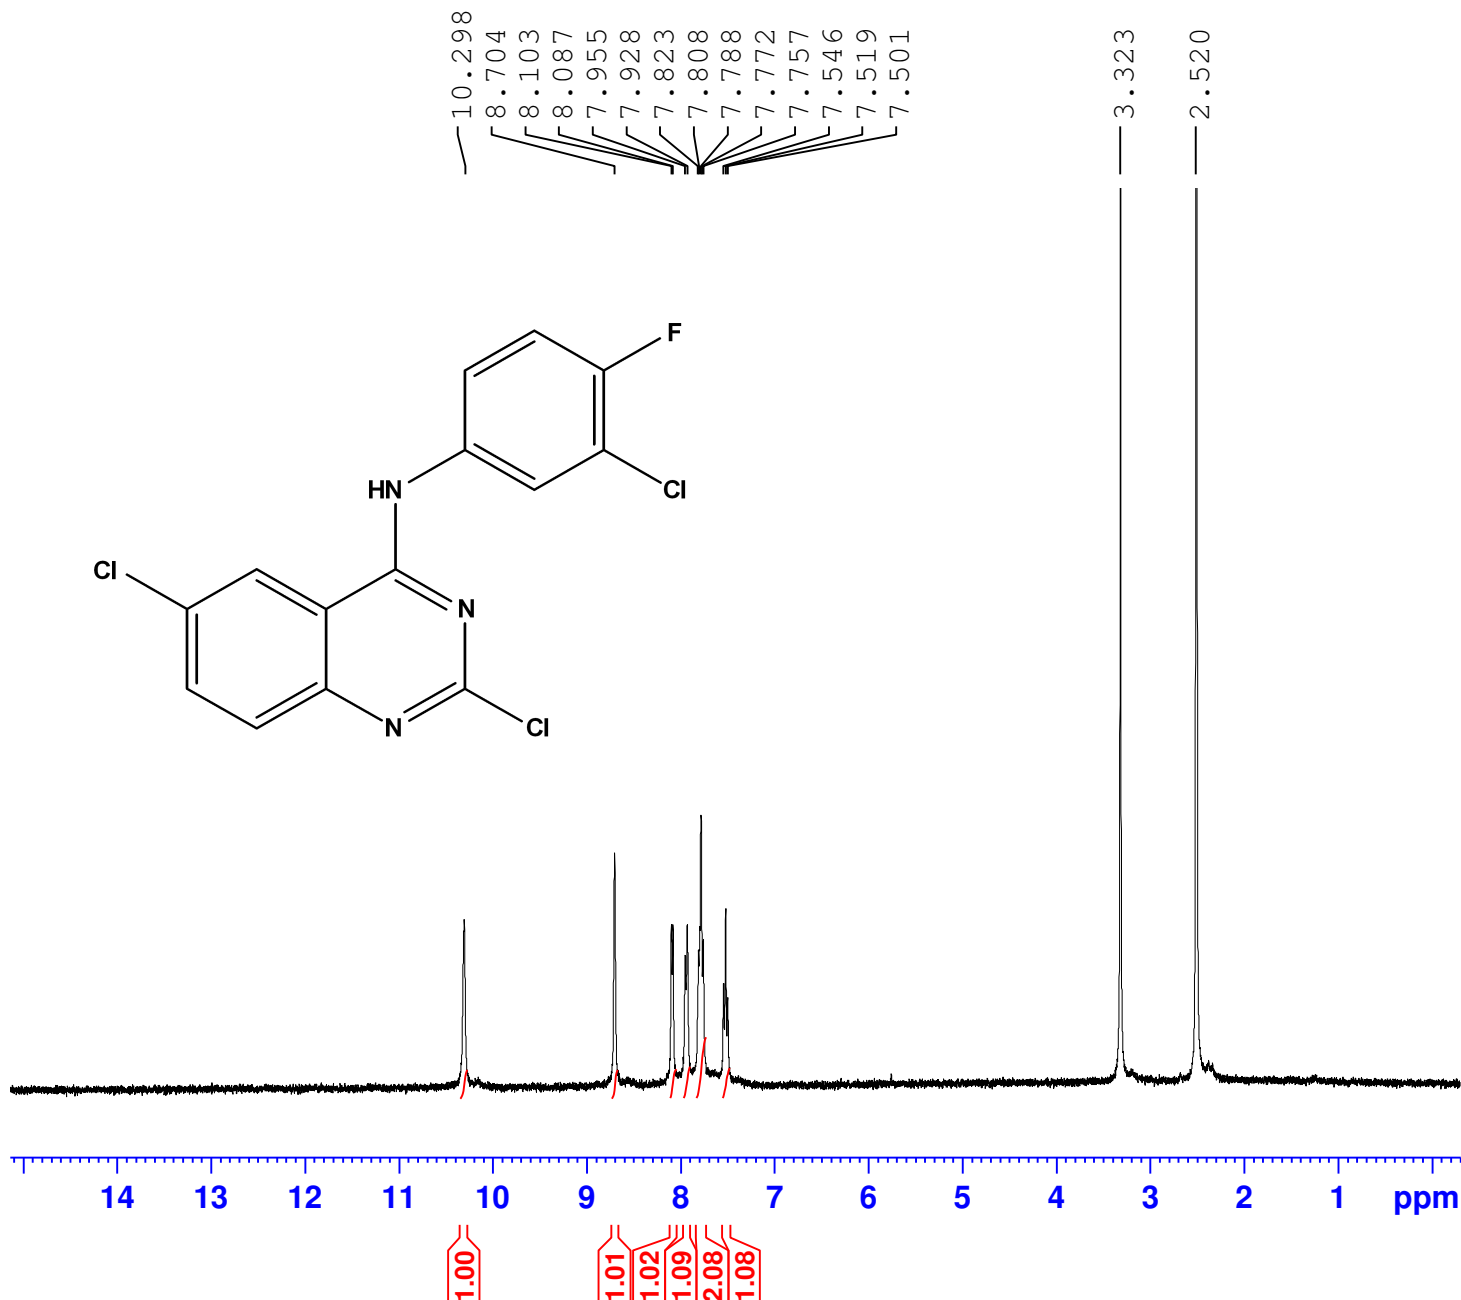



Current Data Parameters  
NAME anas-ramadan-h2-3  
EXPNO 1  
PROCNO 1

F2 - Acquisition Parameters  
Date\_ 20210401  
Time 13.51  
INSTRUM spect  
PROBHD 5 mm PABBO BB/  
PULPROG zg30  
TD 65536  
SOLVENT DMSO  
NS 41  
DS 2  
SWH 8012.820 Hz  
FIDRES 0.122266 Hz  
AQ 4.0894465 sec  
RG 205.37  
DW 62.400 usec  
DE 6.50 usec  
TE 300.0 K  
D1 1.00000000 sec  
TD0 1

===== CHANNEL f1 =====  
SFO1 400.1524711 MHz  
NUC1 1H  
P1 12.00 usec  
PLW1 18.00000000 W

F2 - Processing parameters  
SI 65536  
SF 400.1500000 MHz  
WDW EM  
SSB 0  
LB 0.30 Hz  
GB 0  
PC 1.00

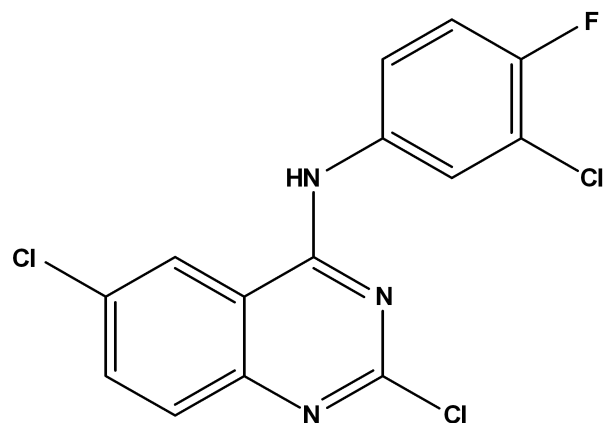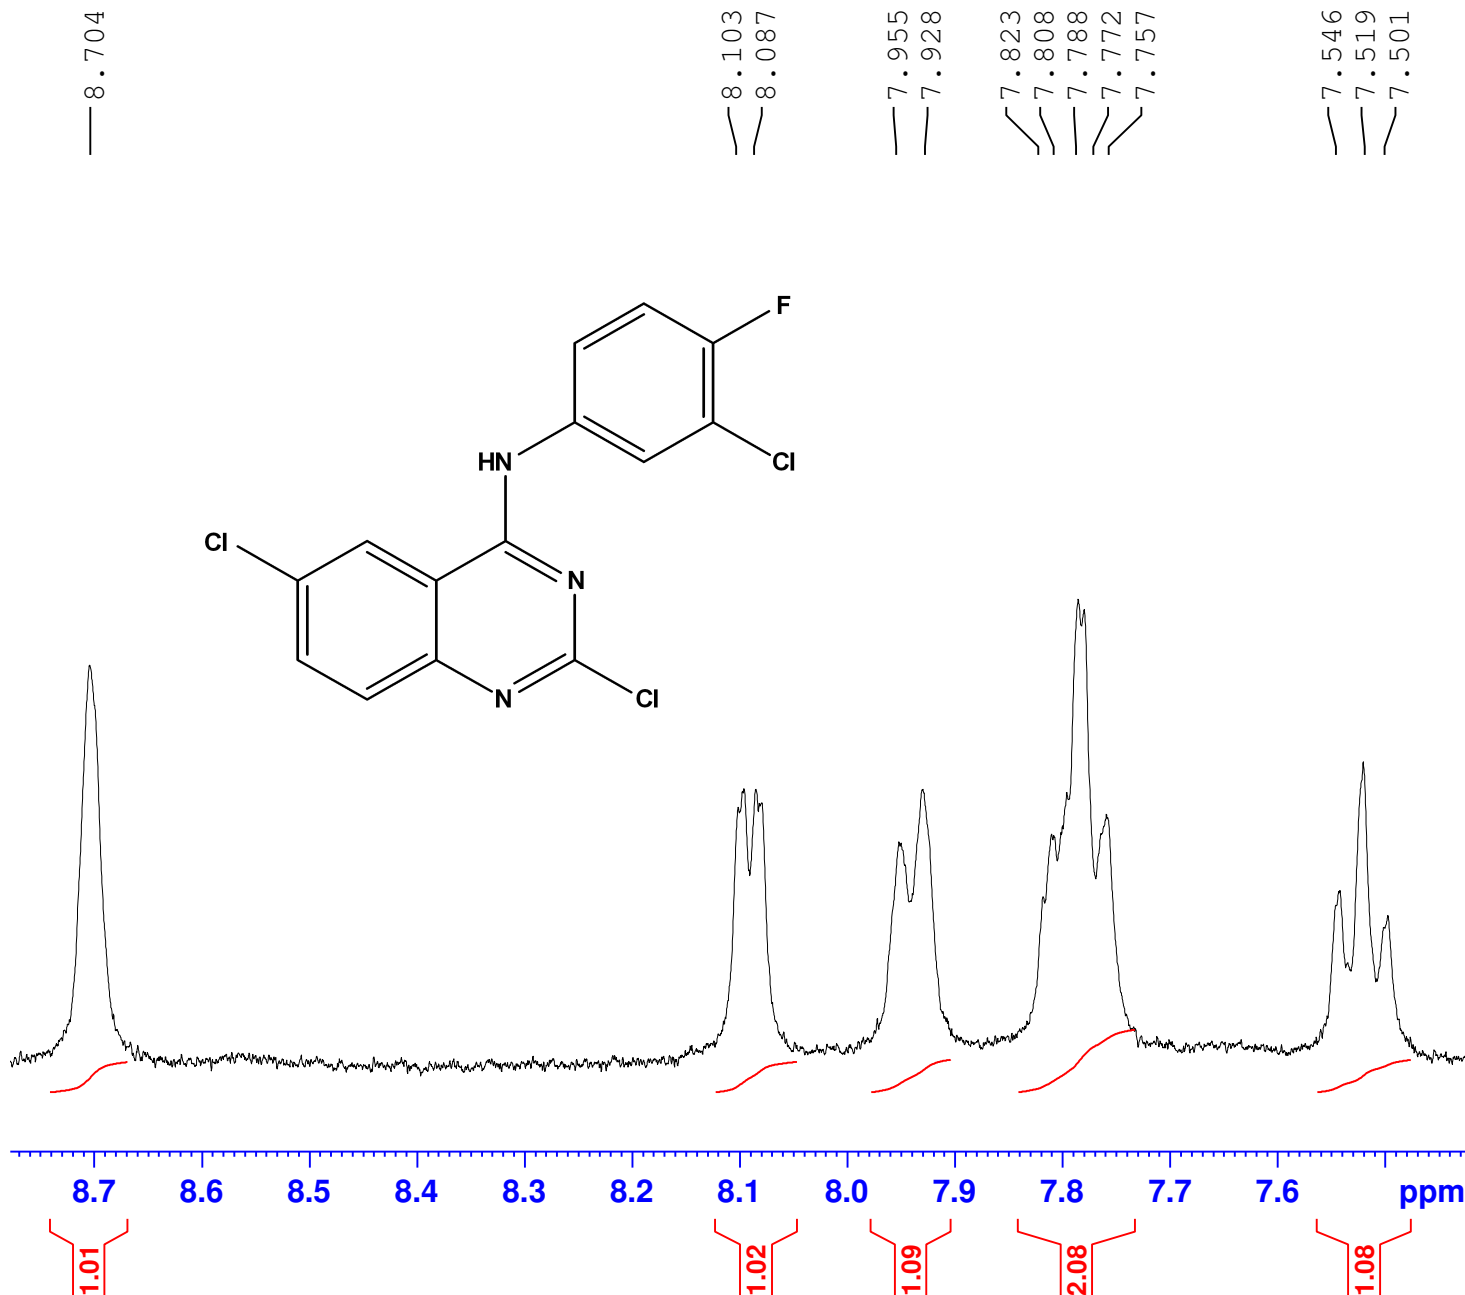

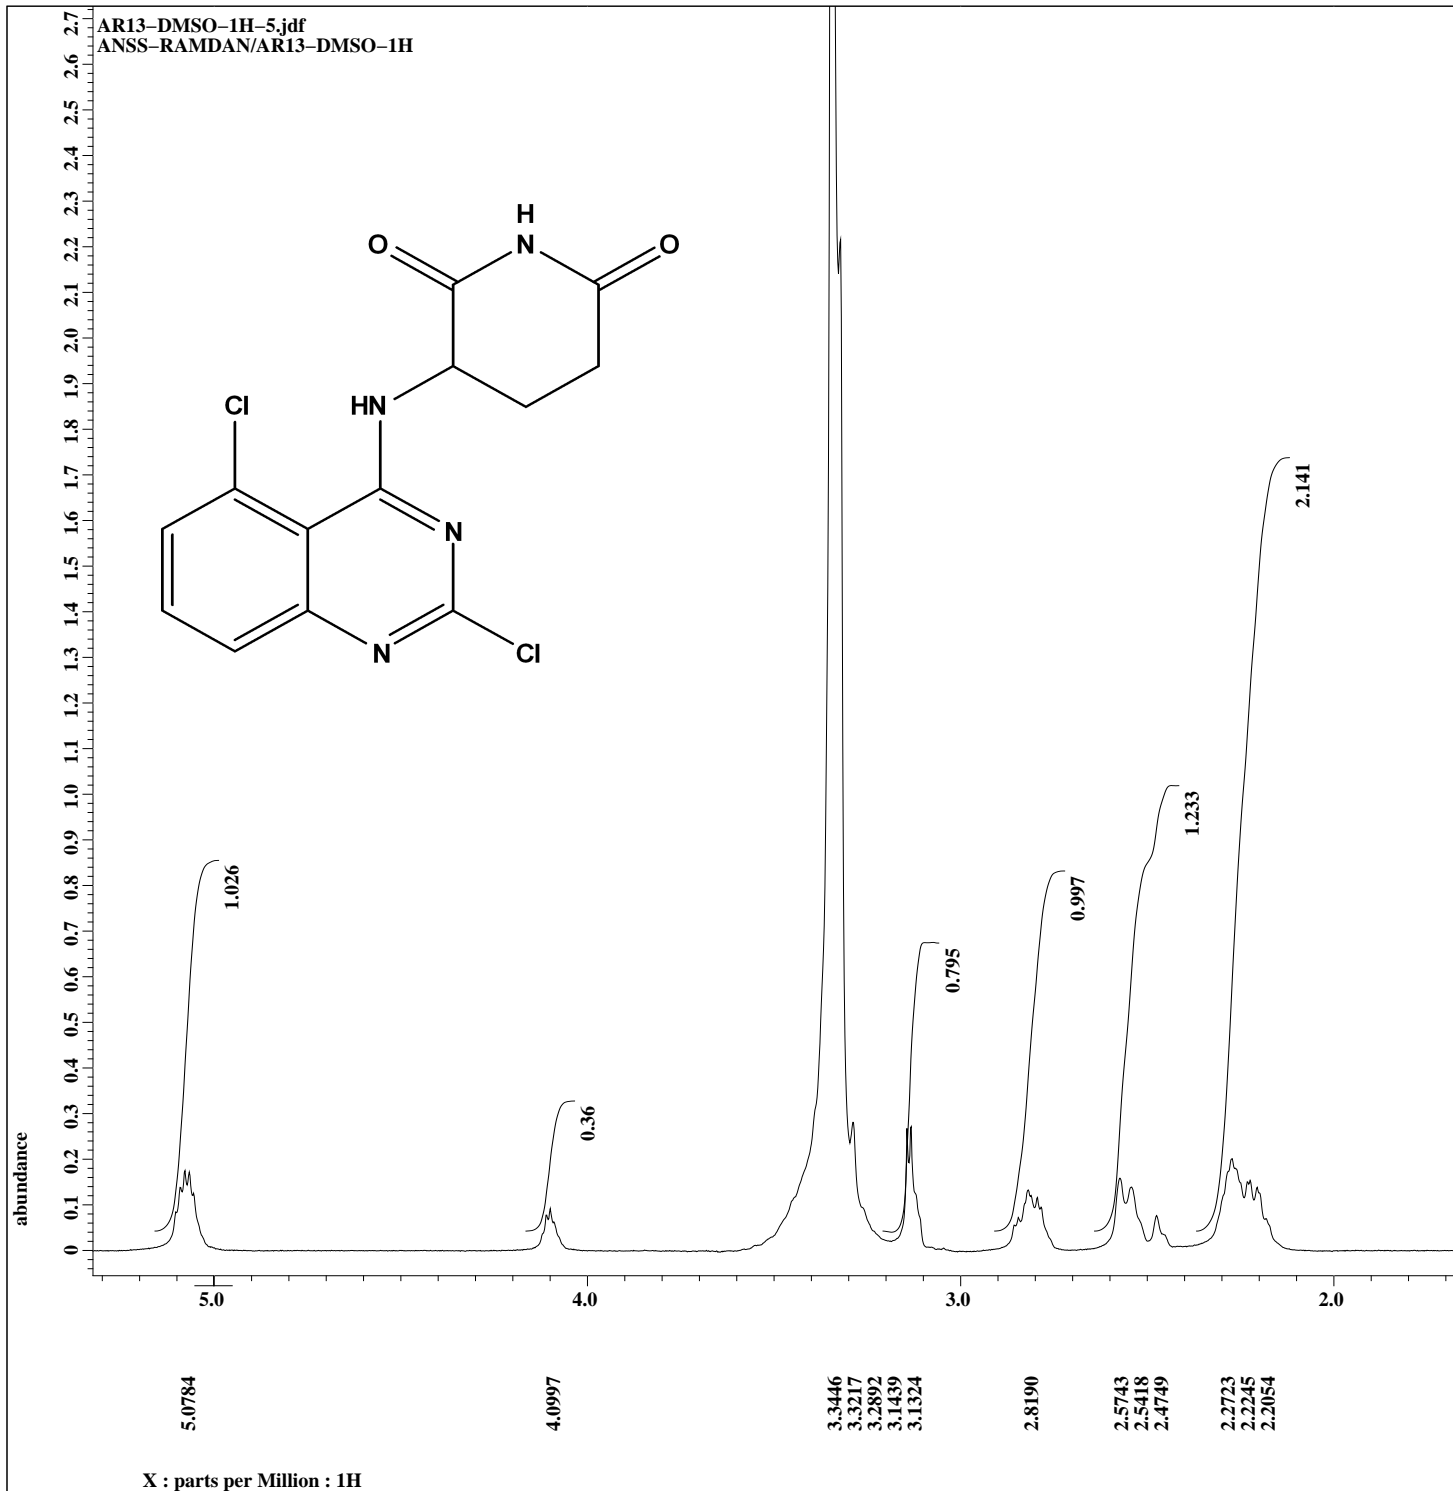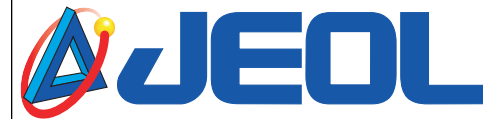

Author = delta3  
Content = ANSS-RAMDAN/AR13  
Creation\_time = 21-MAR-2021 19:3  
Current\_time = 21-MAR-2021 12:3  
Data\_format = 1D REAL  
Dim\_size = 13107  
Dim\_title = 1H  
Dim\_units = [ppm]  
Dimensions = X  
Filename = AR13-DMSO-1H-5.j  
Machine = scc  
Revision\_time = 21-MAR-2021 12:2  
Sample\_id = ANSS-RAMDAN/AR13  
Site = ECA500 (Datum BL  
Spectrometer = DELTA2\_NMR  
Scans = 32  
Mod\_return = 1  
Total\_scans = 32  
X\_points = 16384  
X\_prescans = 1  
X\_domain = 1H  
X\_offset = 5.0[ppm]  
X\_freq = 500.15991521[MHz]  
X\_sweep = 15.6641604[kHz]  
X\_resolution = 0.95606448[Hz]  
Irr\_domain = 1H  
Irr\_offset = 5.0[ppm]  
Irr\_freq = 500.15991521[MHz]  
Tri\_domain = 1H  
Tri\_offset = 5.0[ppm]  
Tri\_freq = 500.15991521[MHz]  
X\_acq\_duration = 1.04595456[s]  
Digital\_filter = TRUE  
Filter\_factor = 8  
Af\_version = 1  
Delay\_of\_start = 1.99999974[s]  
Actual\_start\_time = 21-MAR-2021 19:3  
Acq\_delay = 7.94[us]  
Digital\_filter\_status = 2P  
Clipped = FALSE  
Dc\_balanced = FALSE  
X90 = 12[us]  
Irr90 = 12[us]  
Tri90 = 10[us]  
Qua90 = 10[us]  
Qui90 = 10[us]  
Sex90 = 10[us]  
Sep90 = 10[us]  
Oct90 = 10[us]  
Non90 = 10[us]  
Dec90 = 10[us]  
X90\_hi = 92[us]  
Irr90\_hi = 92[us]  
Tri90\_hi = 10[us]  
Qua90\_hi = 10[us]  
Qui90\_hi = 10[us]  
Sex90\_hi = 10[us]  
Sep90\_hi = 10[us]  
Oct90\_hi = 10[us]  
Non90\_hi = 10[us]  
Dec90\_hi = 10[us]  
X90\_lo = 92[us]  
Irr90\_lo = 92[us]  
Tri90\_lo = 10[us]  
Qua90\_lo = 10[us]  
Qui90\_lo = 10[us]  
Sex90\_lo = 10[us]  
Sep90\_lo = 10[us]  
Oct90\_lo = 10[us]  
Non90\_lo = 10[us]

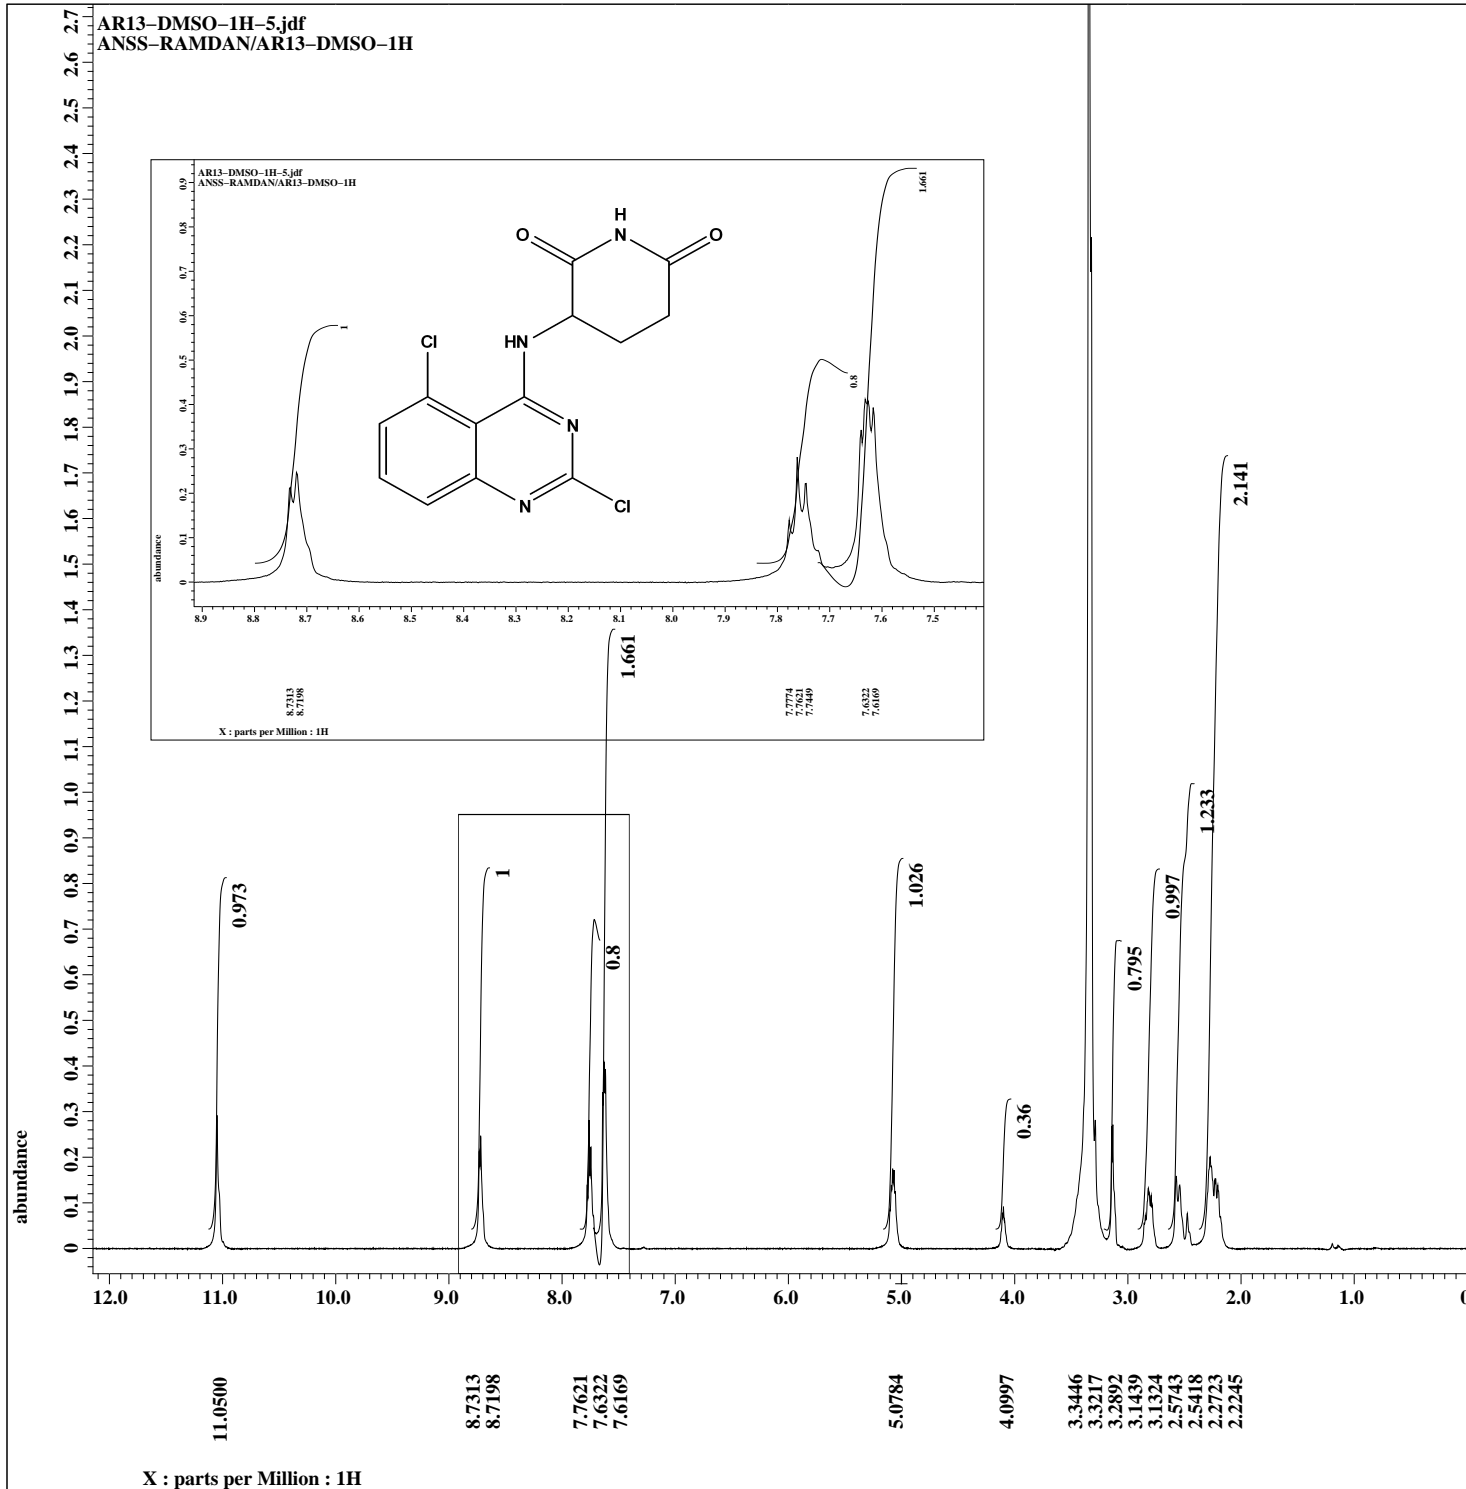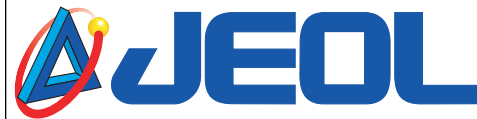

```

Author          = delta3
Content         = ANSS-RAMDAN/AR13
Creation_time   = 21-MAR-2021 19:3
Current_time    = 21-MAR-2021 12:3
Data_format     = 1D REAL
Dim_size        = 13107
Dim_title       = 1H
Dim_units       = [ppm]
Dimensions      = X
Filename        = AR13-DMSO-1H-5.j
Machine         = scc
Revision_time   = 21-MAR-2021 12:2
Sample_id       = ANSS-RAMDAN/AR13
Site            = ECA500 (Datum BL
Spectrometer    = DELTA2_NMR
Scans           = 32
Mod_return      = 1
Total_scans     = 32
X_points        = 16384
X_prescans      = 1
X_domain        = 1H
X_offset        = 5.0[ppm]
X_freq          = 500.15991521[MHz]
X_sweep         = 15.6641604[kHz]
X_resolution    = 0.95606448[Hz]
Irr_domain      = 1H
Irr_offset      = 5.0[ppm]
Irr_freq        = 500.15991521[MHz]
Tri_domain      = 1H
Tri_offset      = 5.0[ppm]
Tri_freq        = 500.15991521[MHz]
X_acq_duration  = 1.04595456[s]
Digital_filter  = TRUE
Filter_factor    = 8
Af_version       = 1
Delay_of_start   = 1.99999974[s]
Actual_start_time = 21-MAR-2021 19:3
Acq_delay        = 7.94[us]
Digital_filter_status = 2P
Clipped         = FALSE
Dc_balanced     = FALSE
X90             = 12[us]
Irr90           = 12[us]
Tri90           = 10[us]
Qua90           = 10[us]
Qui90           = 10[us]
Sex90           = 10[us]
Sep90           = 10[us]
Oct90           = 10[us]
Non90           = 10[us]
Dec90           = 10[us]
X90_hi          = 92[us]
Irr90_hi        = 92[us]
Tri90_hi        = 10[us]
Qua90_hi        = 10[us]
Qui90_hi        = 10[us]
Sex90_hi        = 10[us]
Sep90_hi        = 10[us]
Oct90_hi        = 10[us]
Non90_hi        = 10[us]
Dec90_hi        = 10[us]
X90_lo          = 92[us]
Irr90_lo        = 92[us]
Tri90_lo        = 10[us]
Qua90_lo        = 10[us]
Qui90_lo        = 10[us]
Sex90_lo        = 10[us]
Sep90_lo        = 10[us]
Oct90_lo        = 10[us]
Non90_lo        = 10[us]
  
```

13C NMR of 13b

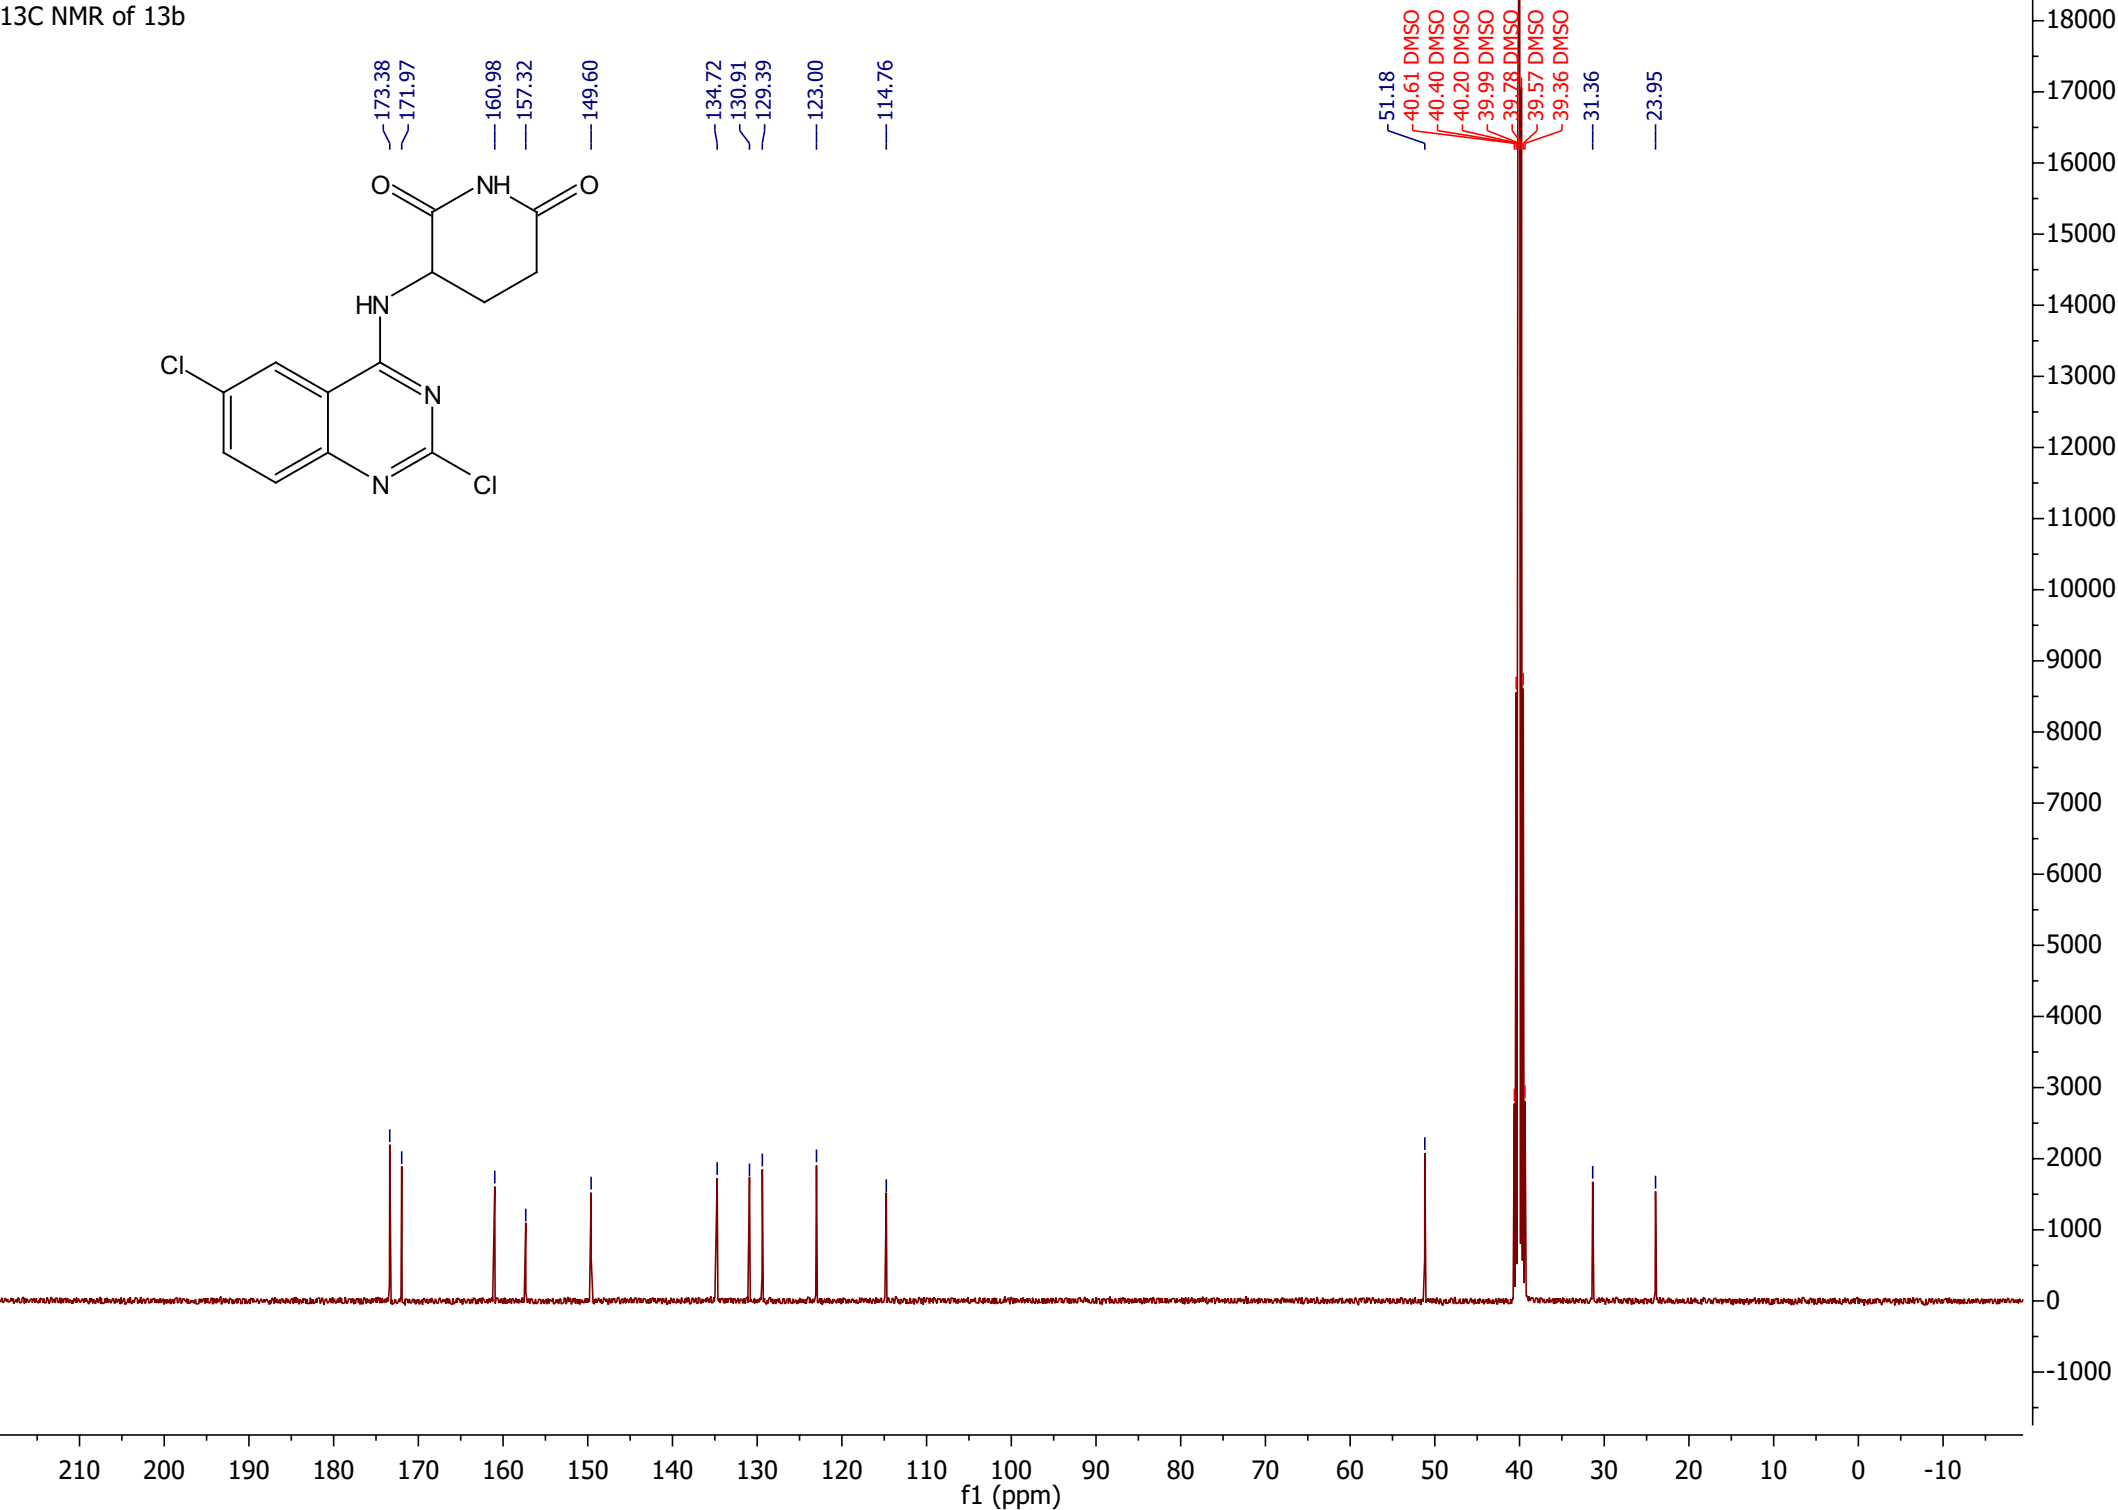

<sup>13</sup>C NMR of 13b

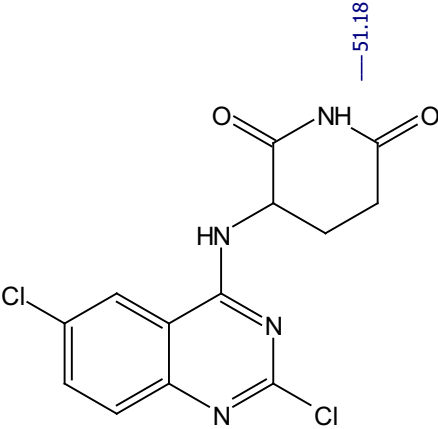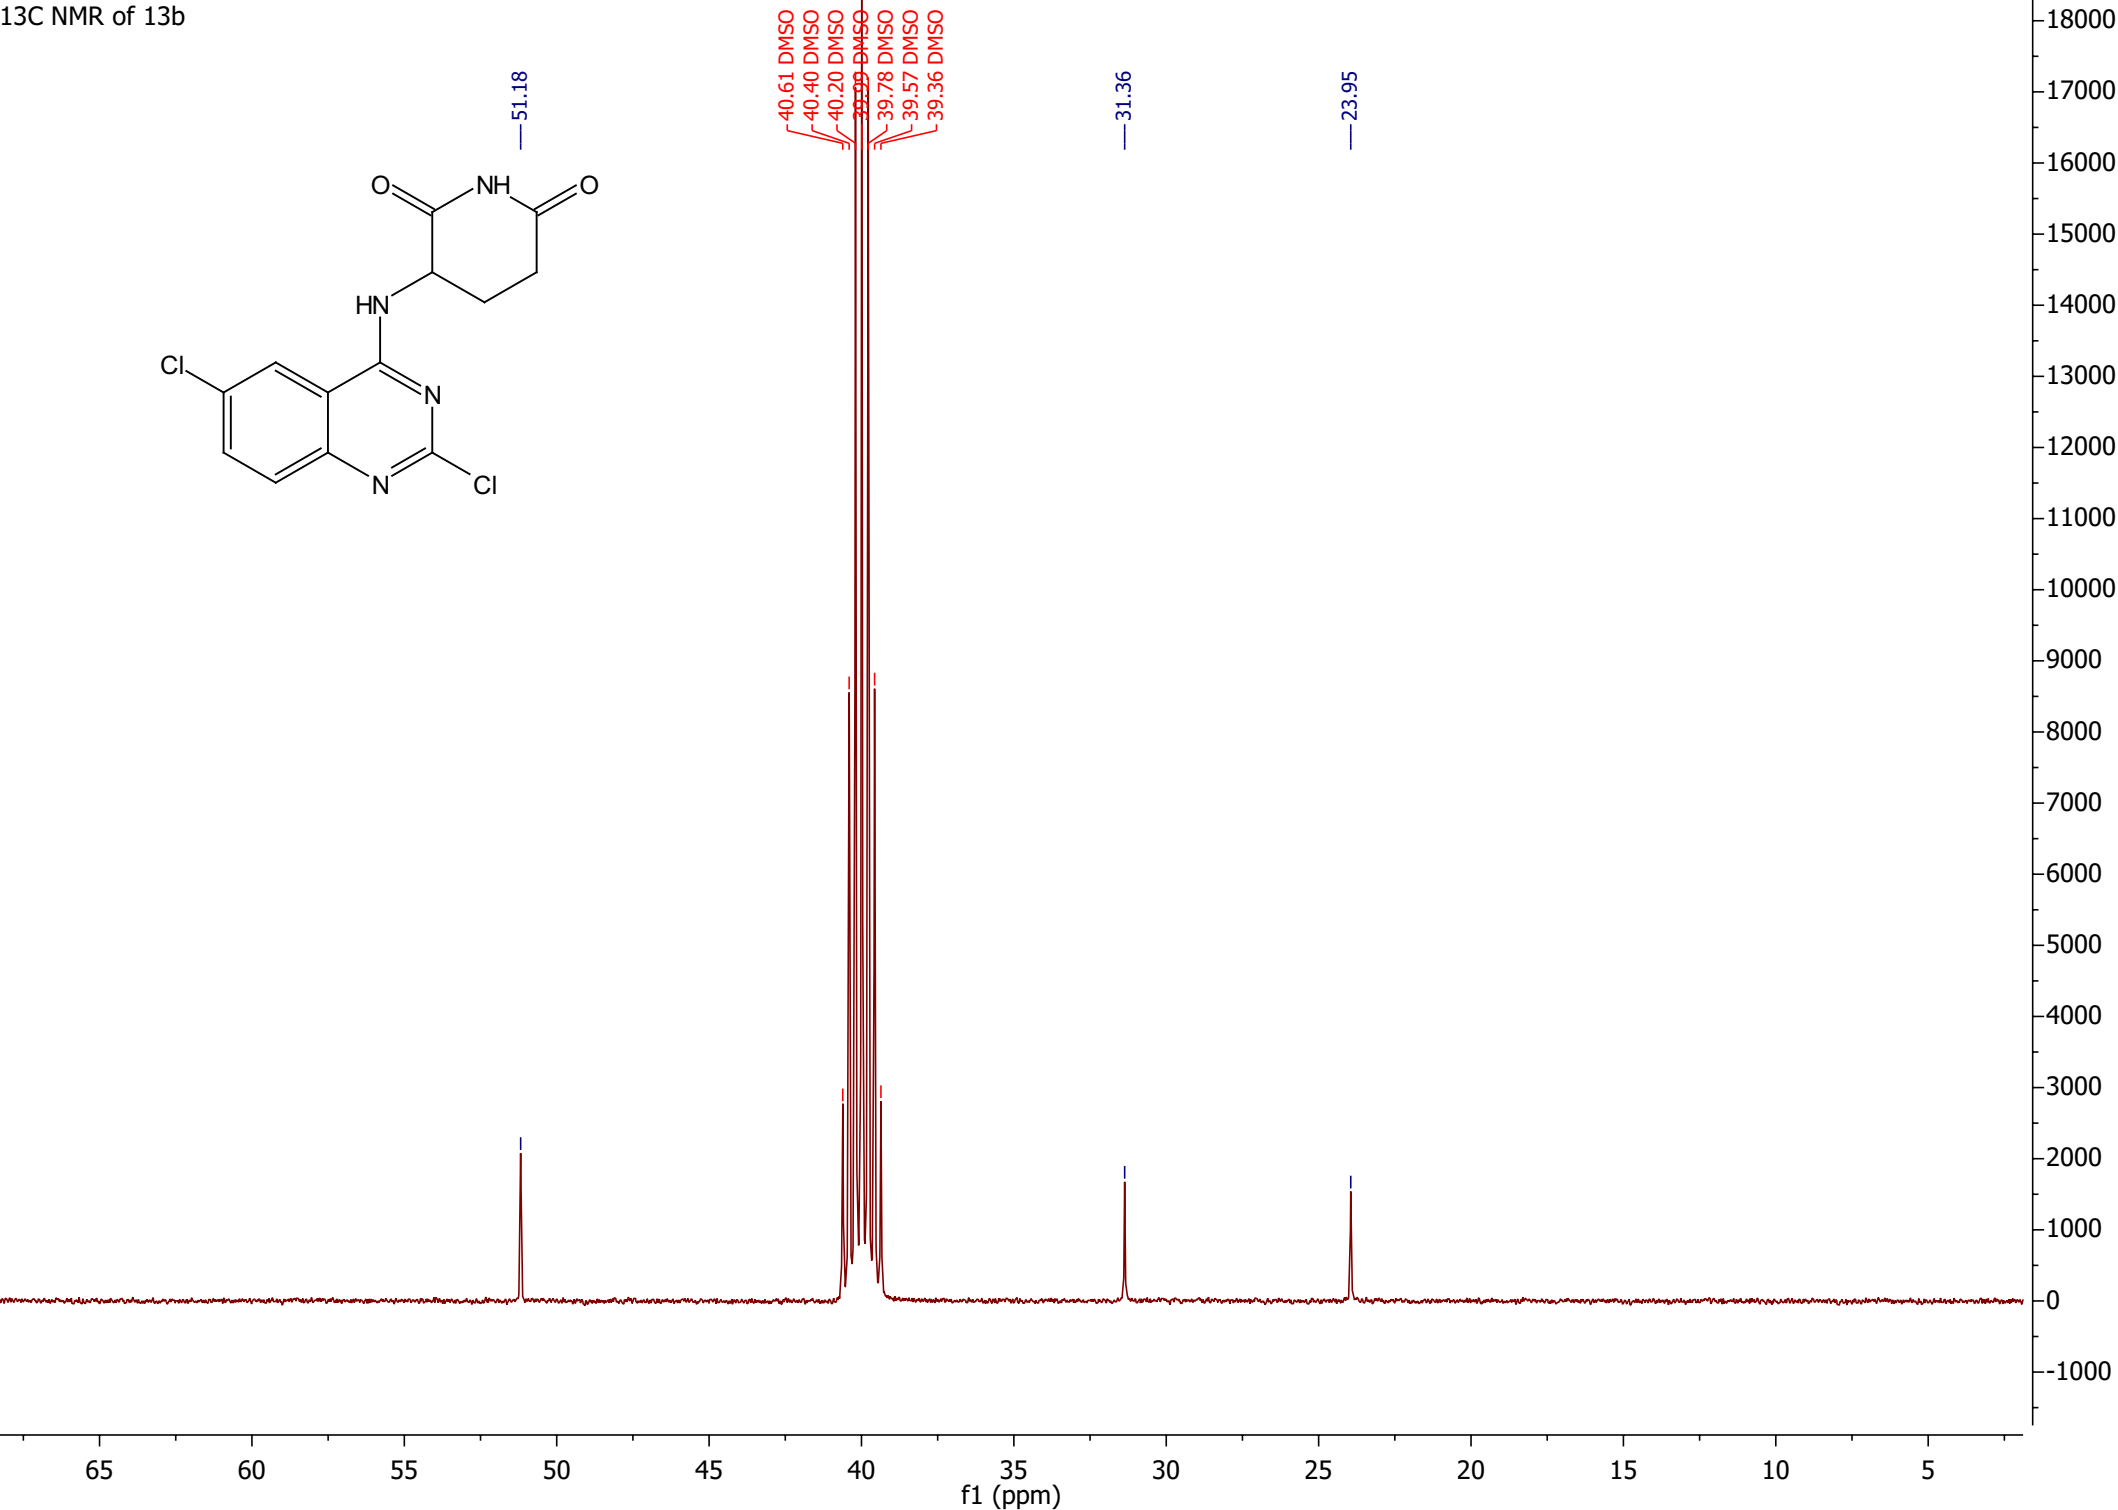

<sup>13</sup>C NMR of 13b

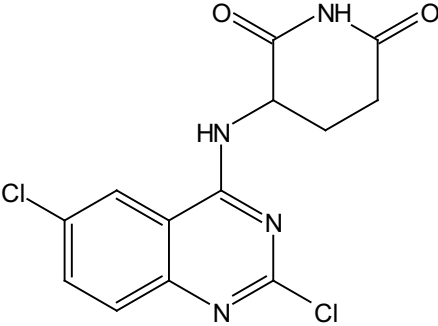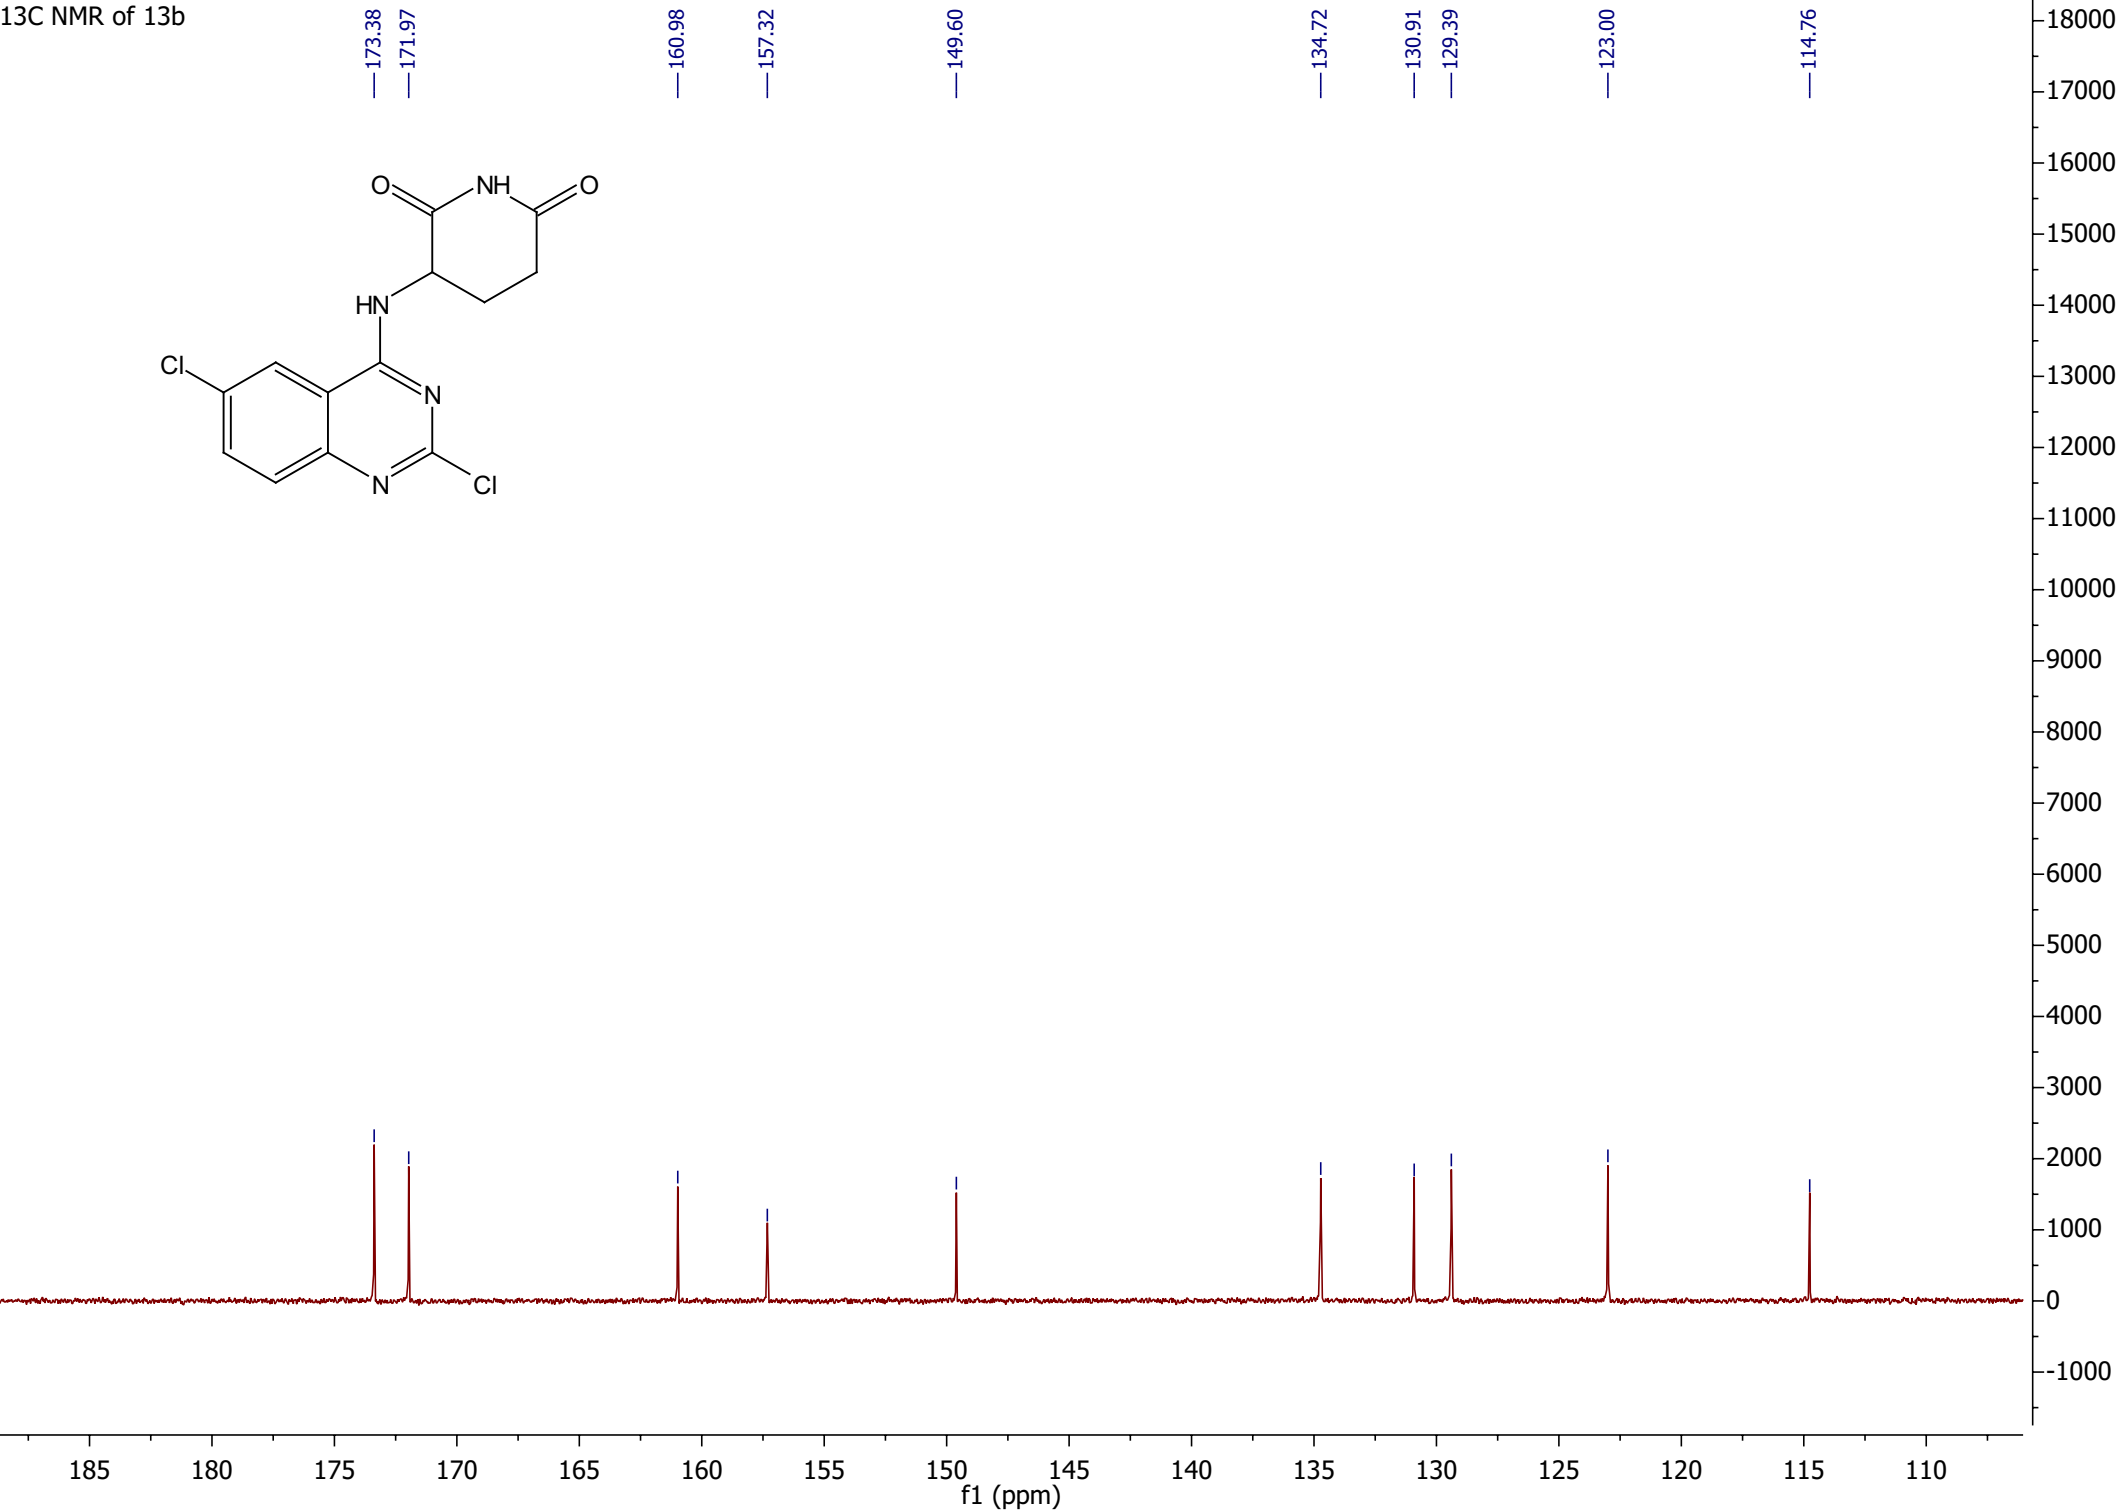

9.027  
9.008  
8.478  
8.470  
7.901  
7.896  
7.878  
7.874  
7.719  
7.695  
5.213  
5.207  
5.193  
5.183  
5.175  
5.160  
3.319  
2.936  
2.917  
2.903  
2.892  
2.871  
2.861  
2.649  
2.635  
2.601  
2.596  
2.588  
2.517  
2.511  
2.508  
2.504  
2.498  
2.276  
2.268  
2.247  
2.232  
2.145  
2.130  
2.113  
2.103  
2.090

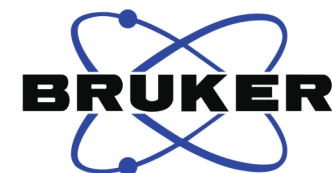

Current Data Parameters  
NAME anas-ramadan-h2-1  
EXPNO 1  
PROCNO 1

F2 - Acquisition Parameters  
Date\_ 20210401  
Time 13.31  
INSTRUM spect  
PROBHD 5 mm PABBO BB/  
PULPROG zg30  
TD 65536  
SOLVENT DMSO  
NS 16  
DS 2  
SWH 8012.820 Hz  
FIDRES 0.122266 Hz  
AQ 4.0894465 sec  
RG 205.37  
DW 62.400 usec  
DE 6.50 usec  
TE 300.0 K  
D1 1.00000000 sec  
TD0 1

===== CHANNEL f1 =====  
SFO1 400.1524711 MHz  
NUC1 1H  
P1 12.00 usec  
PLW1 18.00000000 W

F2 - Processing parameters  
SI 65536  
SF 400.1500000 MHz  
WDW EM  
SSB 0  
LB 0.30 Hz  
GB 0  
PC 1.00

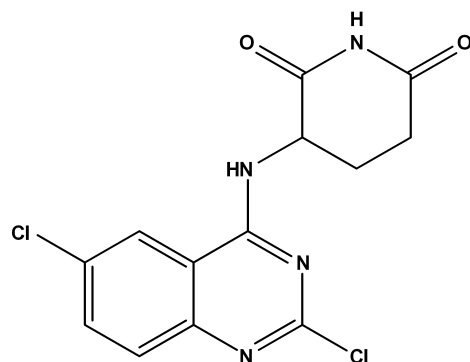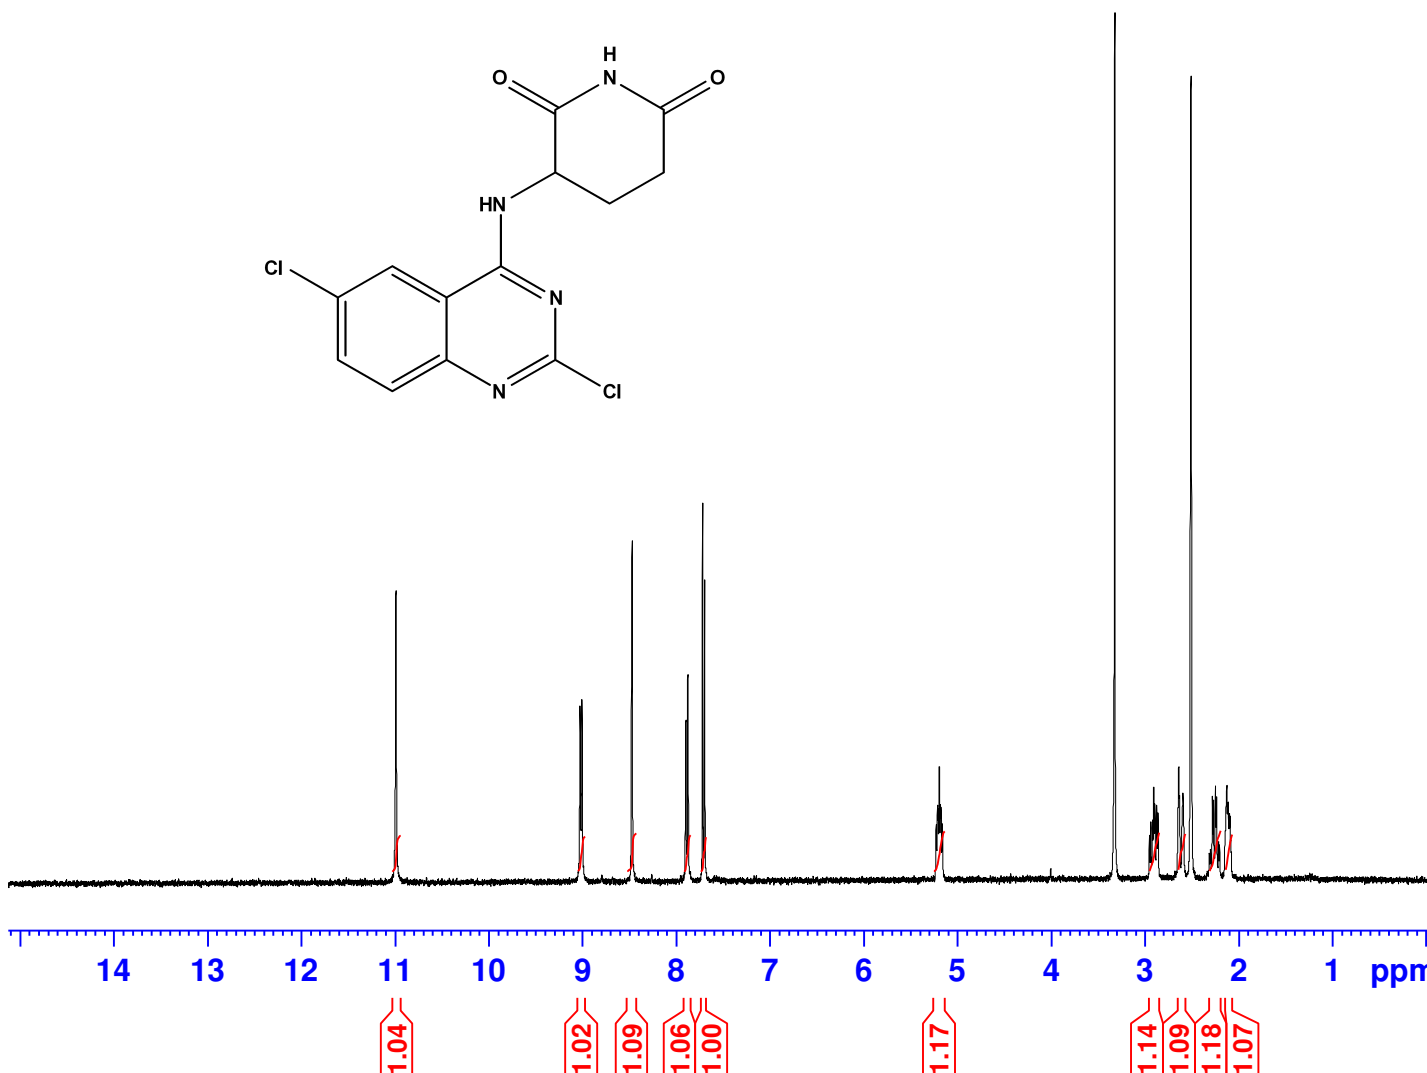



Current Data Parameters  
NAME anas-ramadan-h2-1  
EXPNO 1  
PROCNO 1

F2 - Acquisition Parameters  
Date\_ 20210401  
Time 13.31  
INSTRUM spect  
PROBHD 5 mm PABBO BB/  
PULPROG zg30  
TD 65536  
SOLVENT DMSO  
NS 16  
DS 2  
SWH 8012.820 Hz  
FIDRES 0.122266 Hz  
AQ 4.0894465 sec  
RG 205.37  
DW 62.400 usec  
DE 6.50 usec  
TE 300.0 K  
D1 1.00000000 sec  
TD0 1

===== CHANNEL f1 =====  
SFO1 400.1524711 MHz  
NUC1 1H  
P1 12.00 usec  
PLW1 18.00000000 W

F2 - Processing parameters  
SI 65536  
SF 400.1500000 MHz  
WDW EM  
SSB 0  
LB 0.30 Hz  
GB 0  
PC 1.00

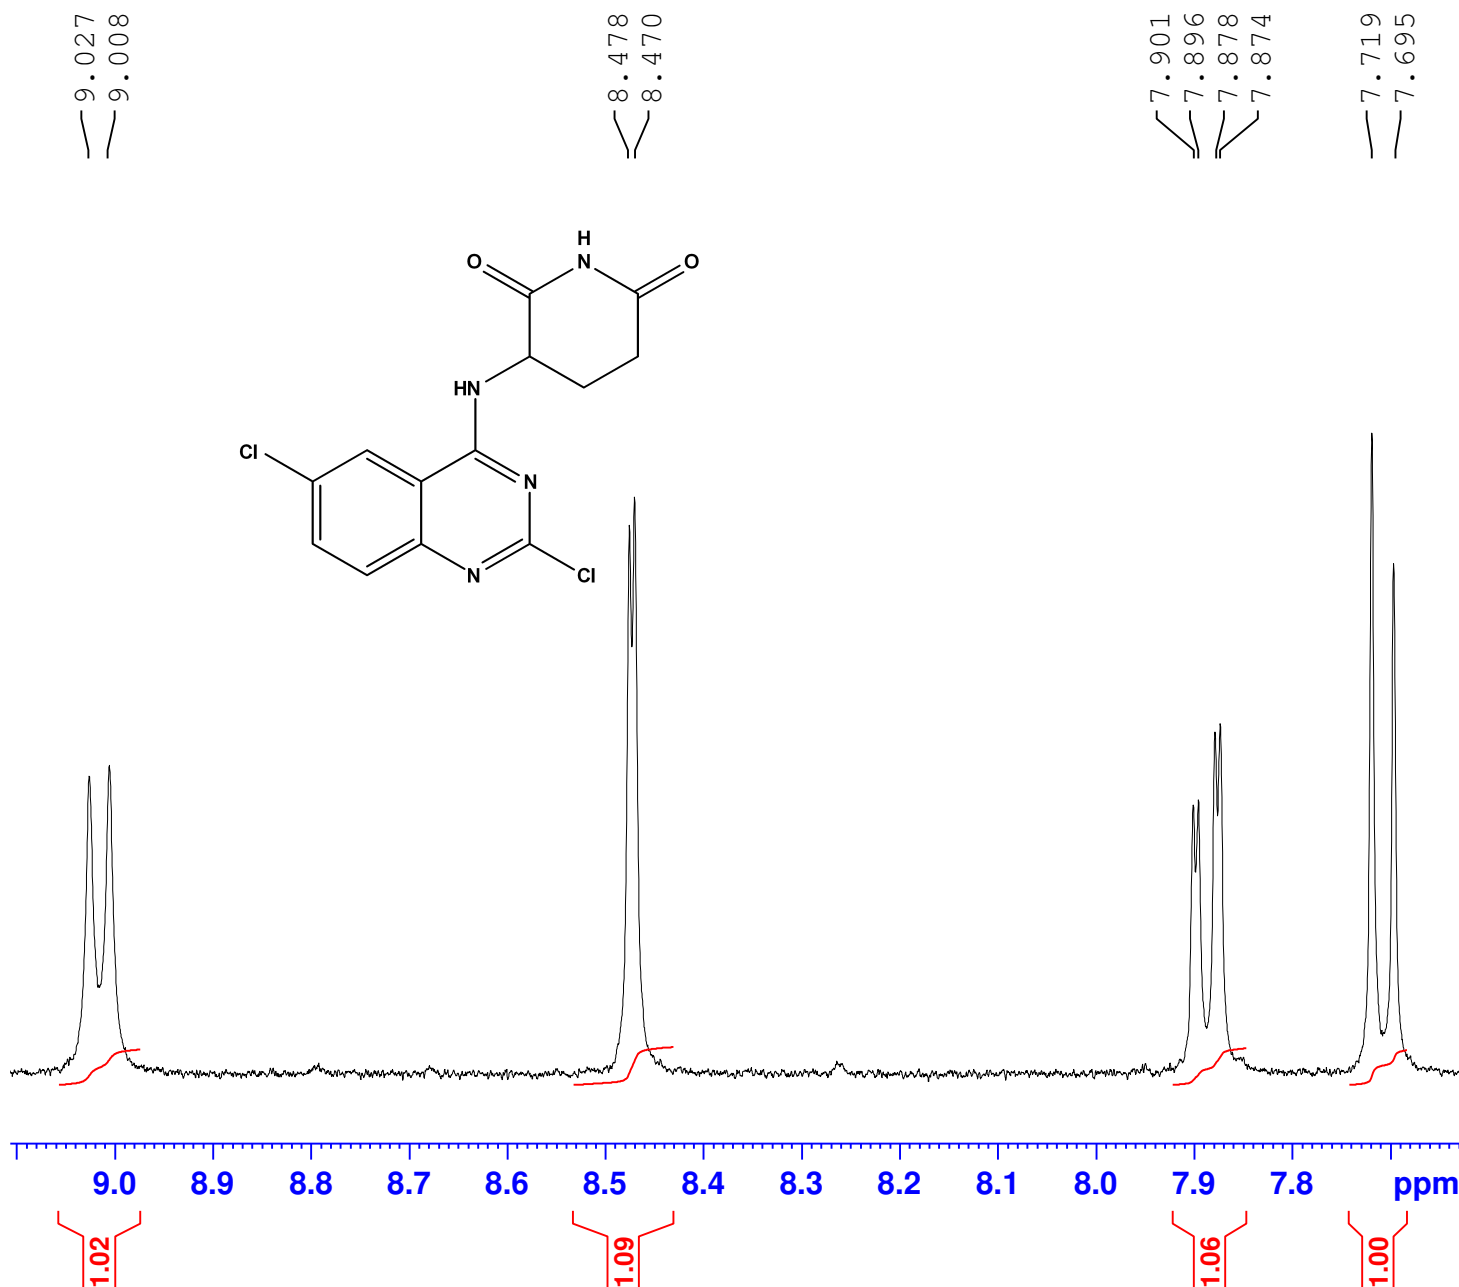

5.193  
5.183  
5.175  
5.160

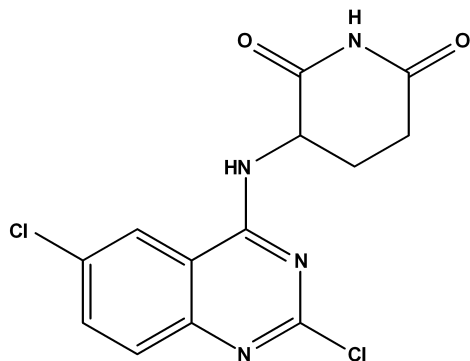

3.319  
2.949  
2.936  
2.917  
2.903  
2.892  
2.871  
2.861  
2.649  
2.635  
2.624  
2.601  
2.596  
2.588  
2.517  
2.511  
2.508  
2.504  
2.498  
2.314



Current Data Parameters  
NAME anas-ramadan-h2-1  
EXPNO 1  
PROCNO 1

F2 - Acquisition Parameters  
Date\_ 20210401  
Time 13.31  
INSTRUM spect  
PROBHD 5 mm PABBO BB/  
PULPROG zg30  
TD 65536  
SOLVENT DMSO  
NS 16  
DS 2  
SWH 8012.820 Hz  
FIDRES 0.122266 Hz  
AQ 4.0894465 sec  
RG 205.37  
DW 62.400 usec  
DE 6.50 usec  
TE 300.0 K  
D1 1.00000000 sec  
TD0 1

===== CHANNEL f1 =====  
SFO1 400.1524711 MHz  
NUC1 1H  
P1 12.00 usec  
PLW1 18.00000000 W

F2 - Processing parameters  
SI 65536  
SF 400.1500000 MHz  
WDW EM  
SSB 0  
LB 0.30 Hz  
GB 0  
PC 1.00

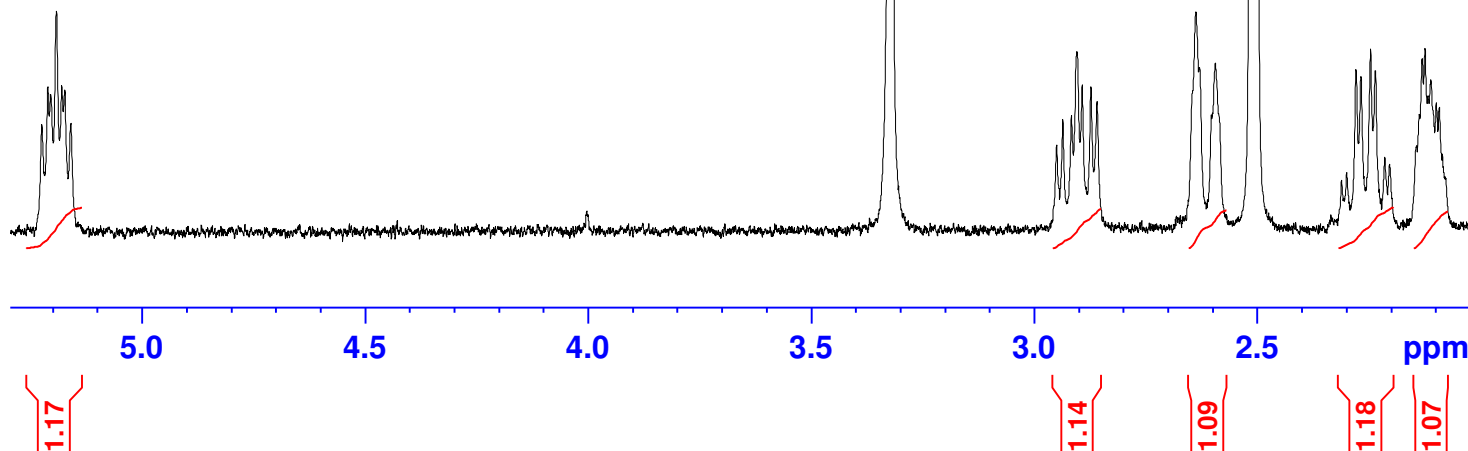

<sup>13</sup>C NMR of 15b

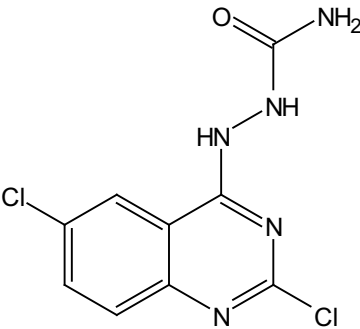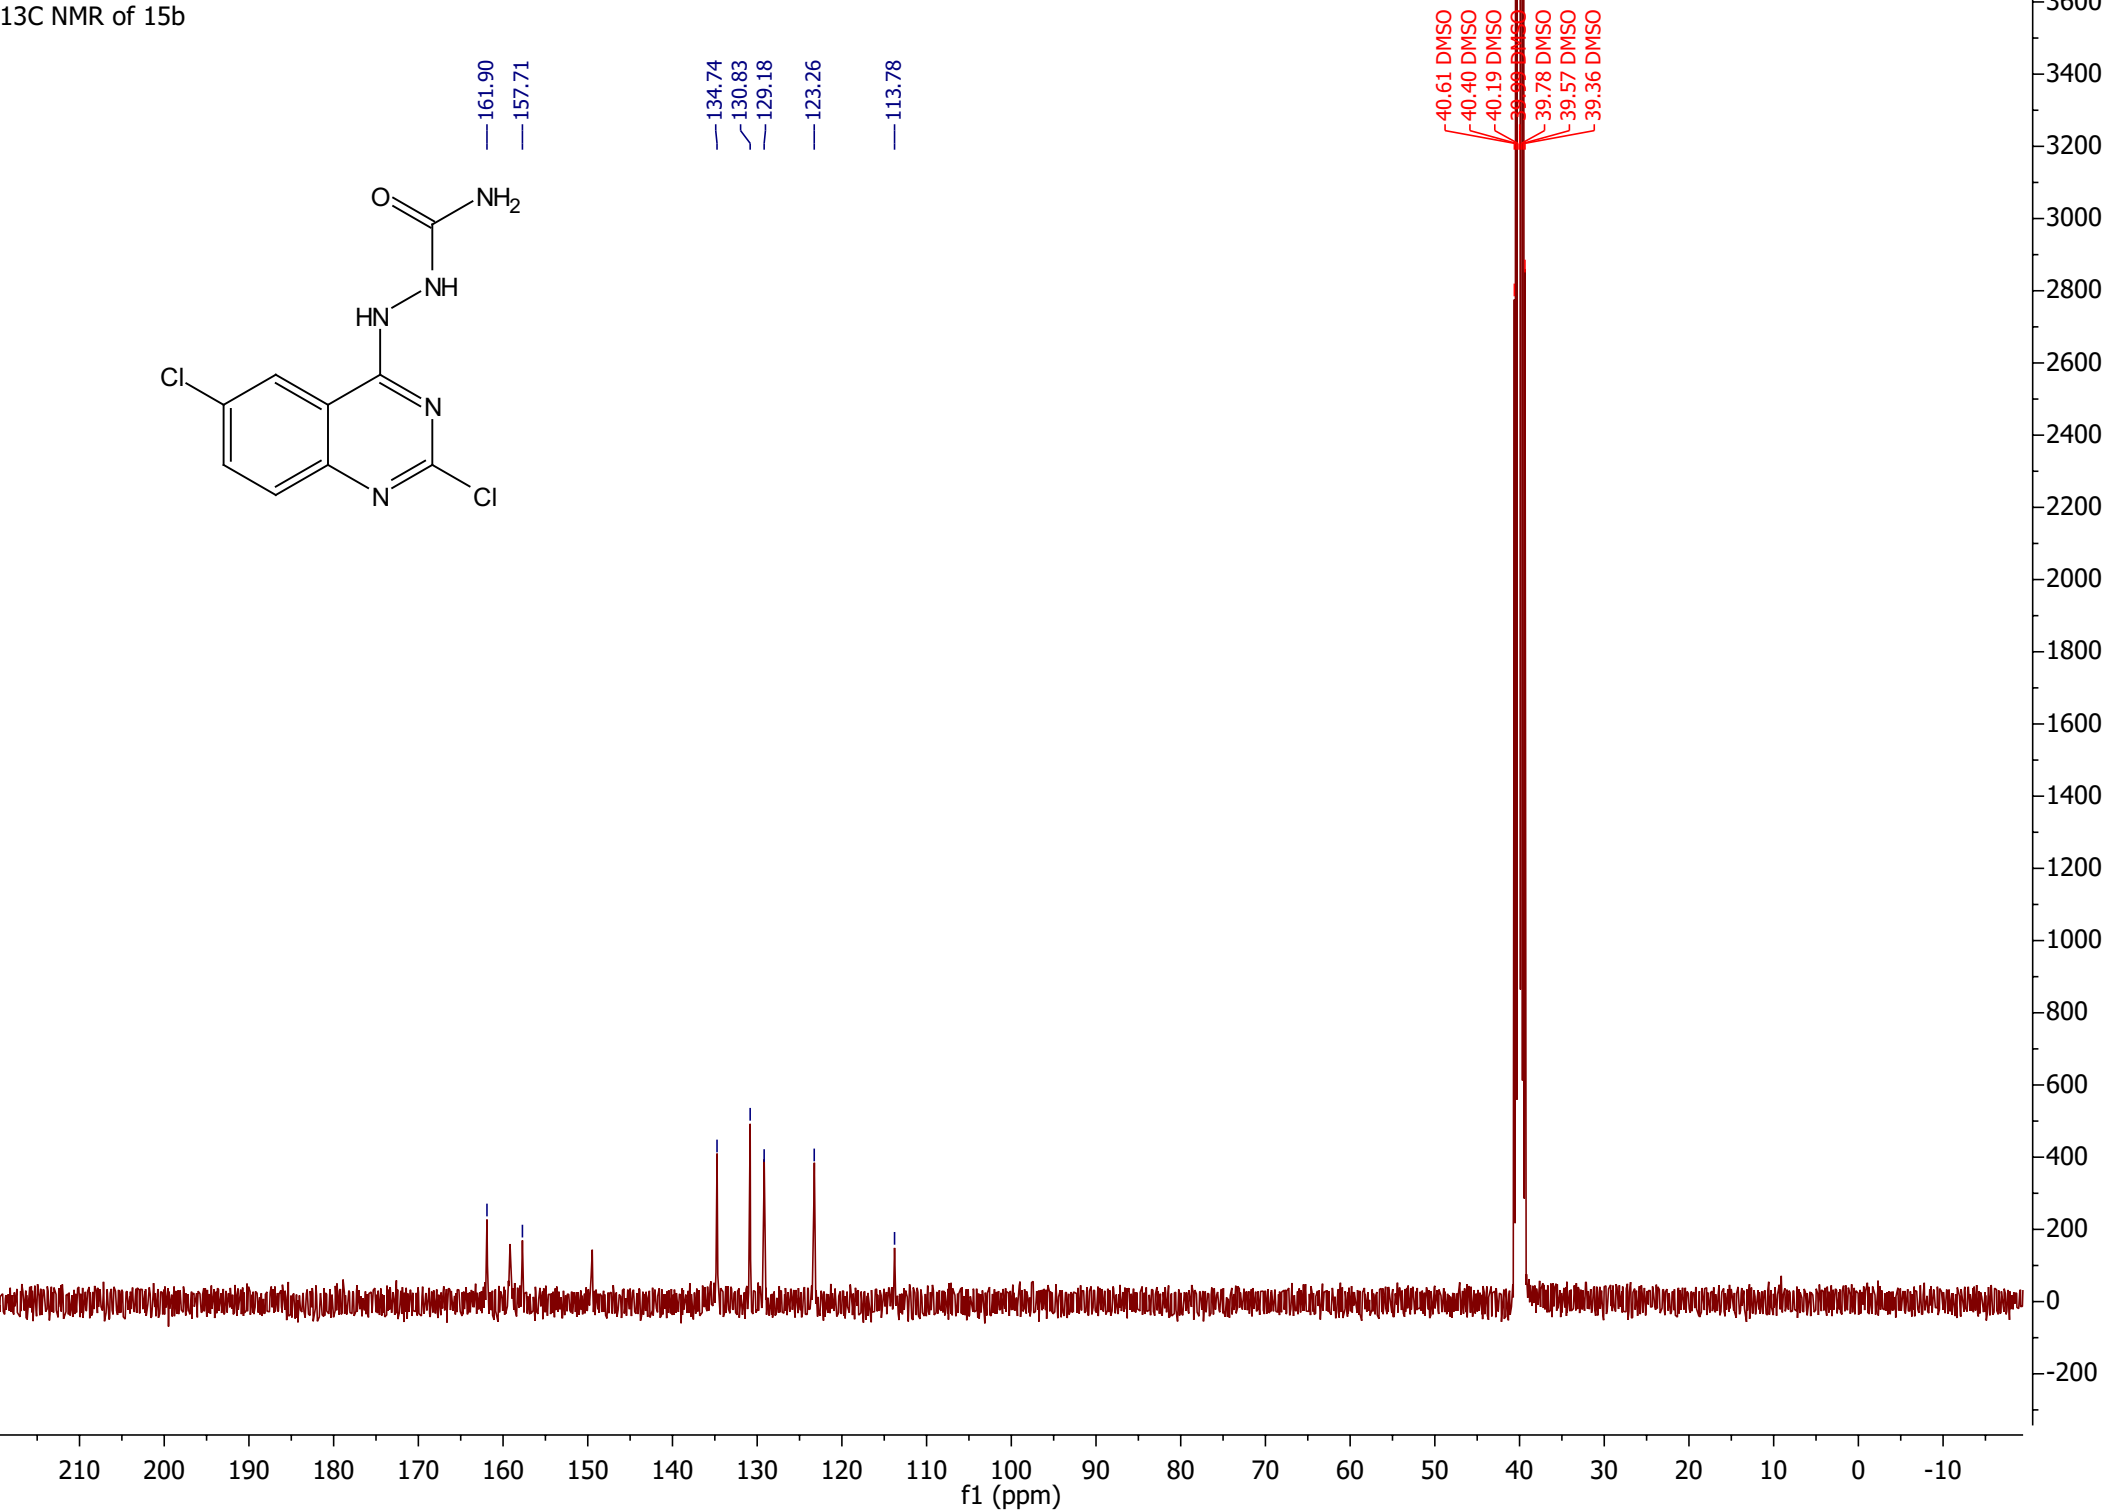

<sup>13</sup>C NMR of 15b

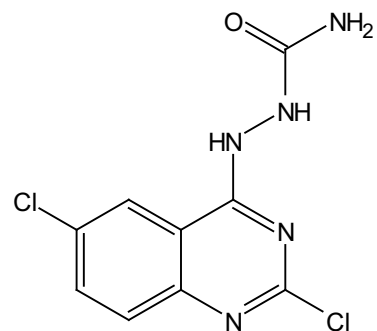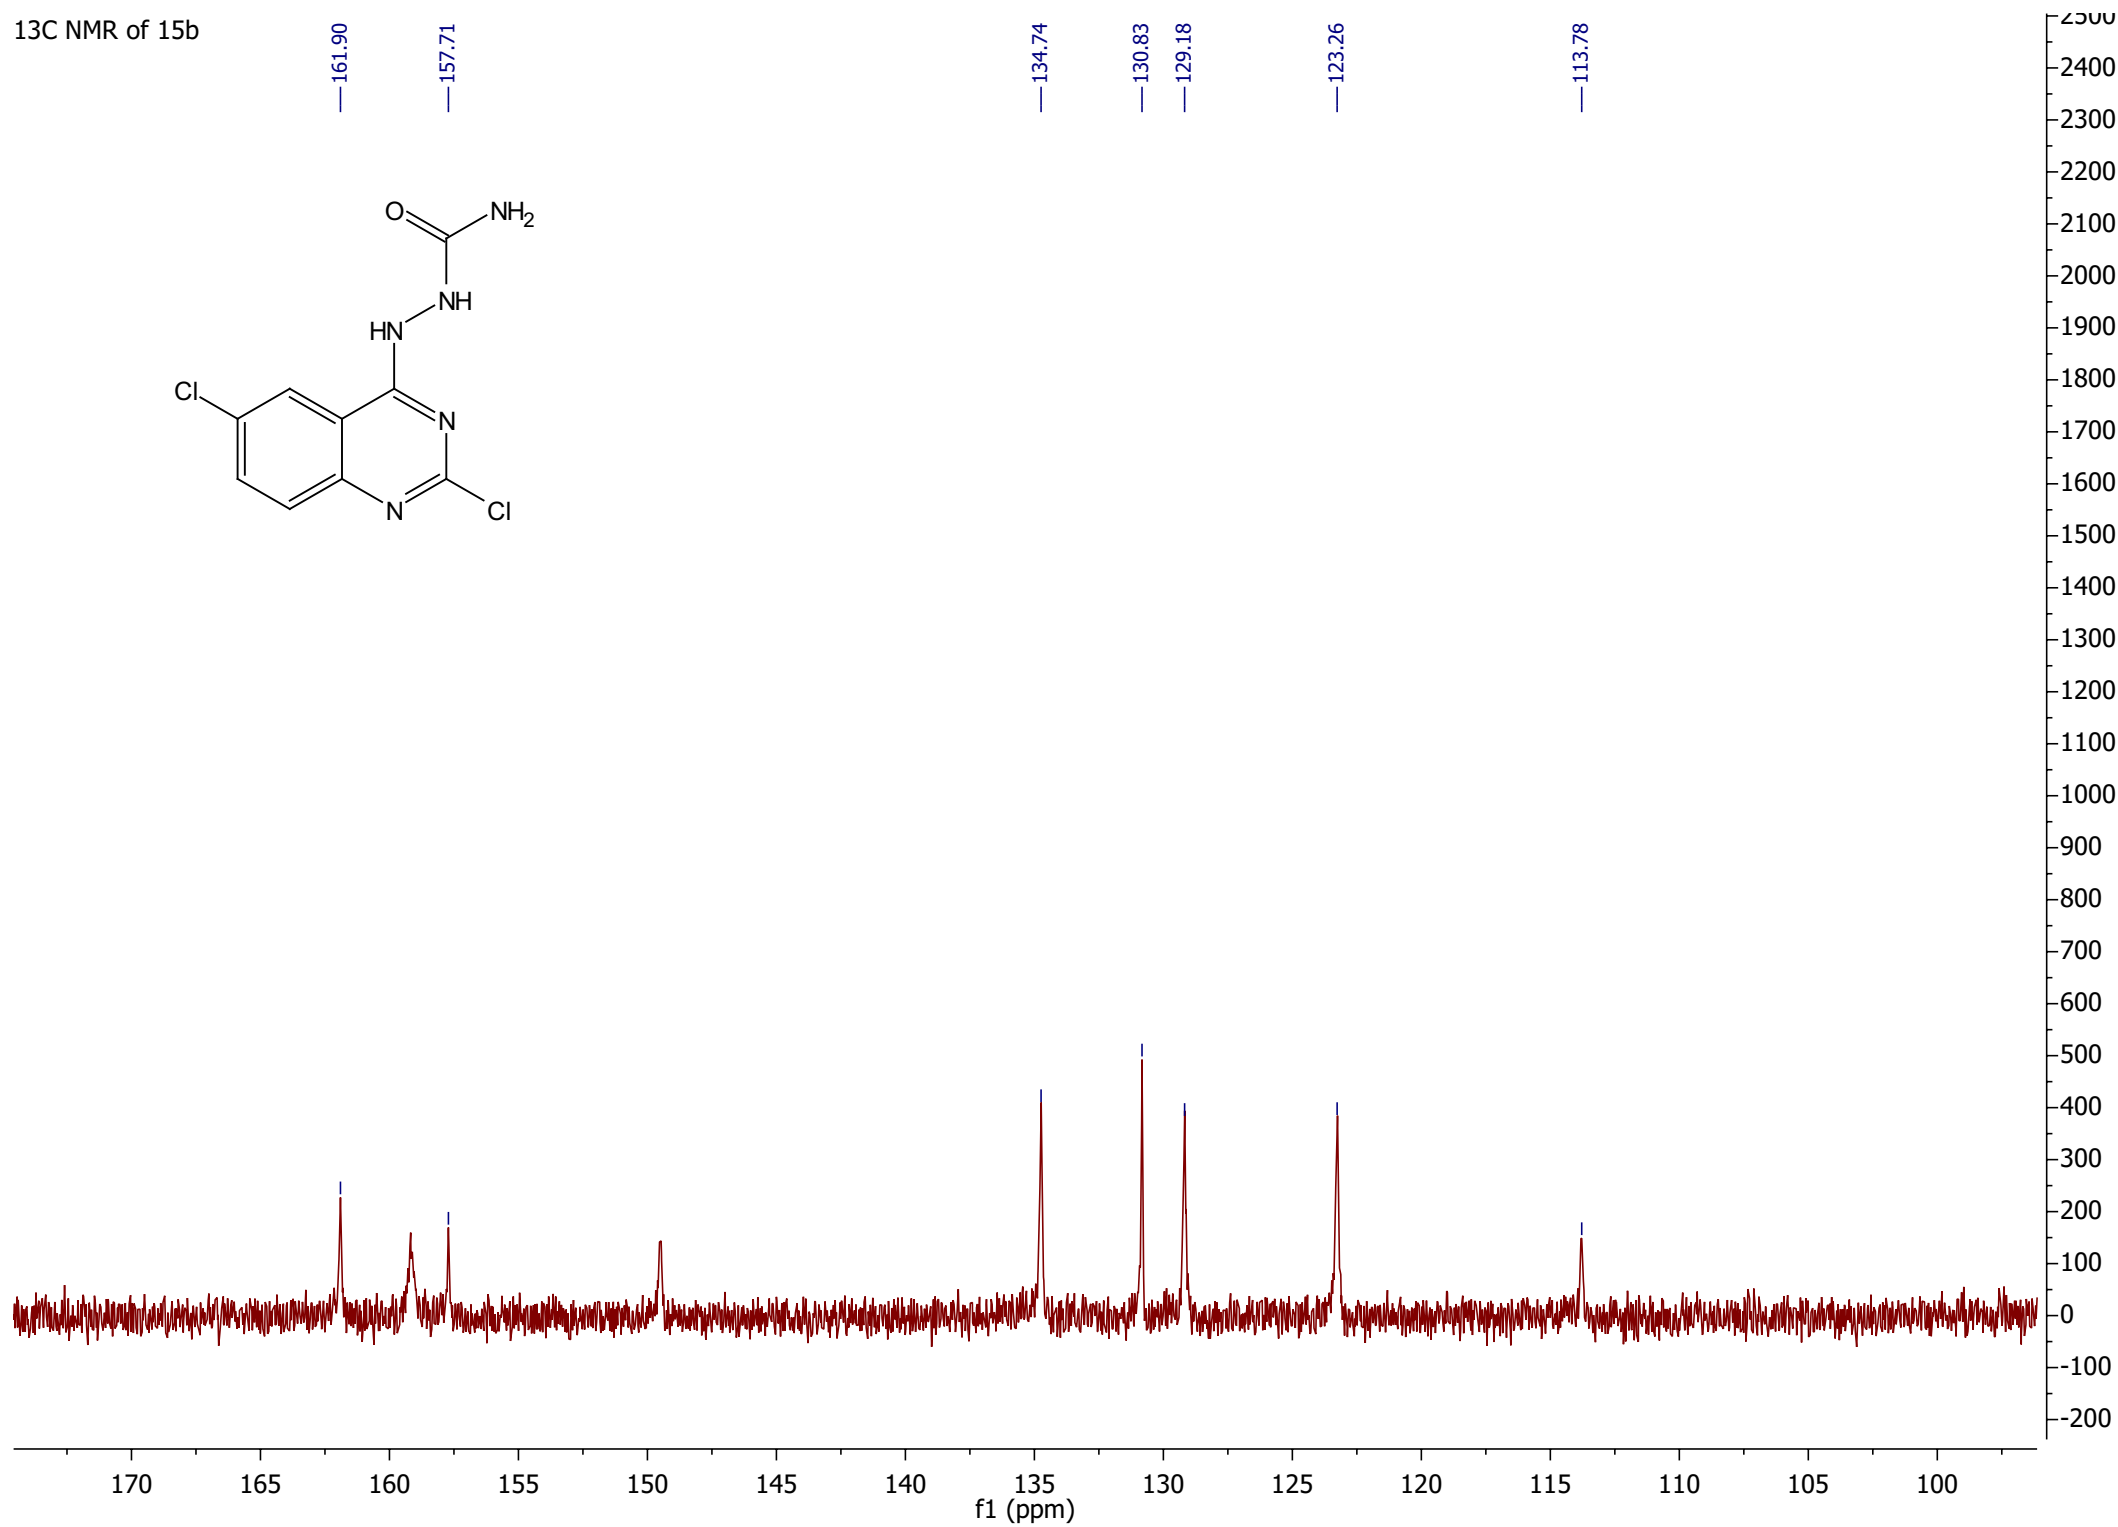



Current Data Parameters  
NAME anas-ramadan-h2-2  
EXPNO 1  
PROCNO 1

F2 - Acquisition Parameters  
Date\_ 20210401  
Time 13.44  
INSTRUM spect  
PROBHD 5 mm PABBO BB/  
PULPROG zg30  
TD 65536  
SOLVENT DMSO  
NS 64  
DS 2  
SWH 8012.820 Hz  
FIDRES 0.122266 Hz  
AQ 4.0894465 sec  
RG 205.37  
DW 62.400 usec  
DE 6.50 usec  
TE 300.0 K  
D1 1.00000000 sec  
TD0 1

===== CHANNEL f1 =====  
SFO1 400.1524711 MHz  
NUC1 1H  
P1 12.00 usec  
PLW1 18.00000000 W

F2 - Processing parameters  
SI 65536  
SF 400.1500000 MHz  
WDW EM  
SSB 0  
LB 0.30 Hz  
GB 0  
PC 1.00

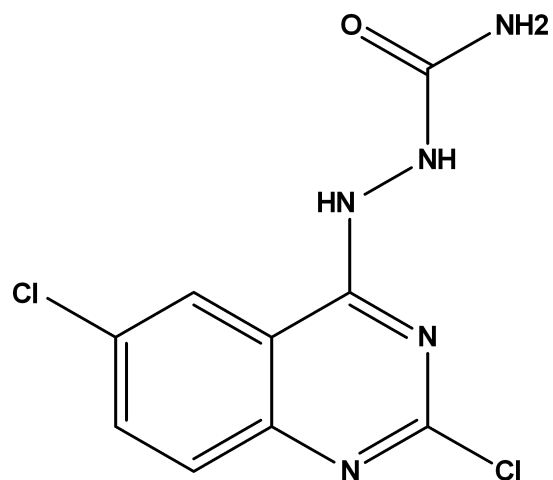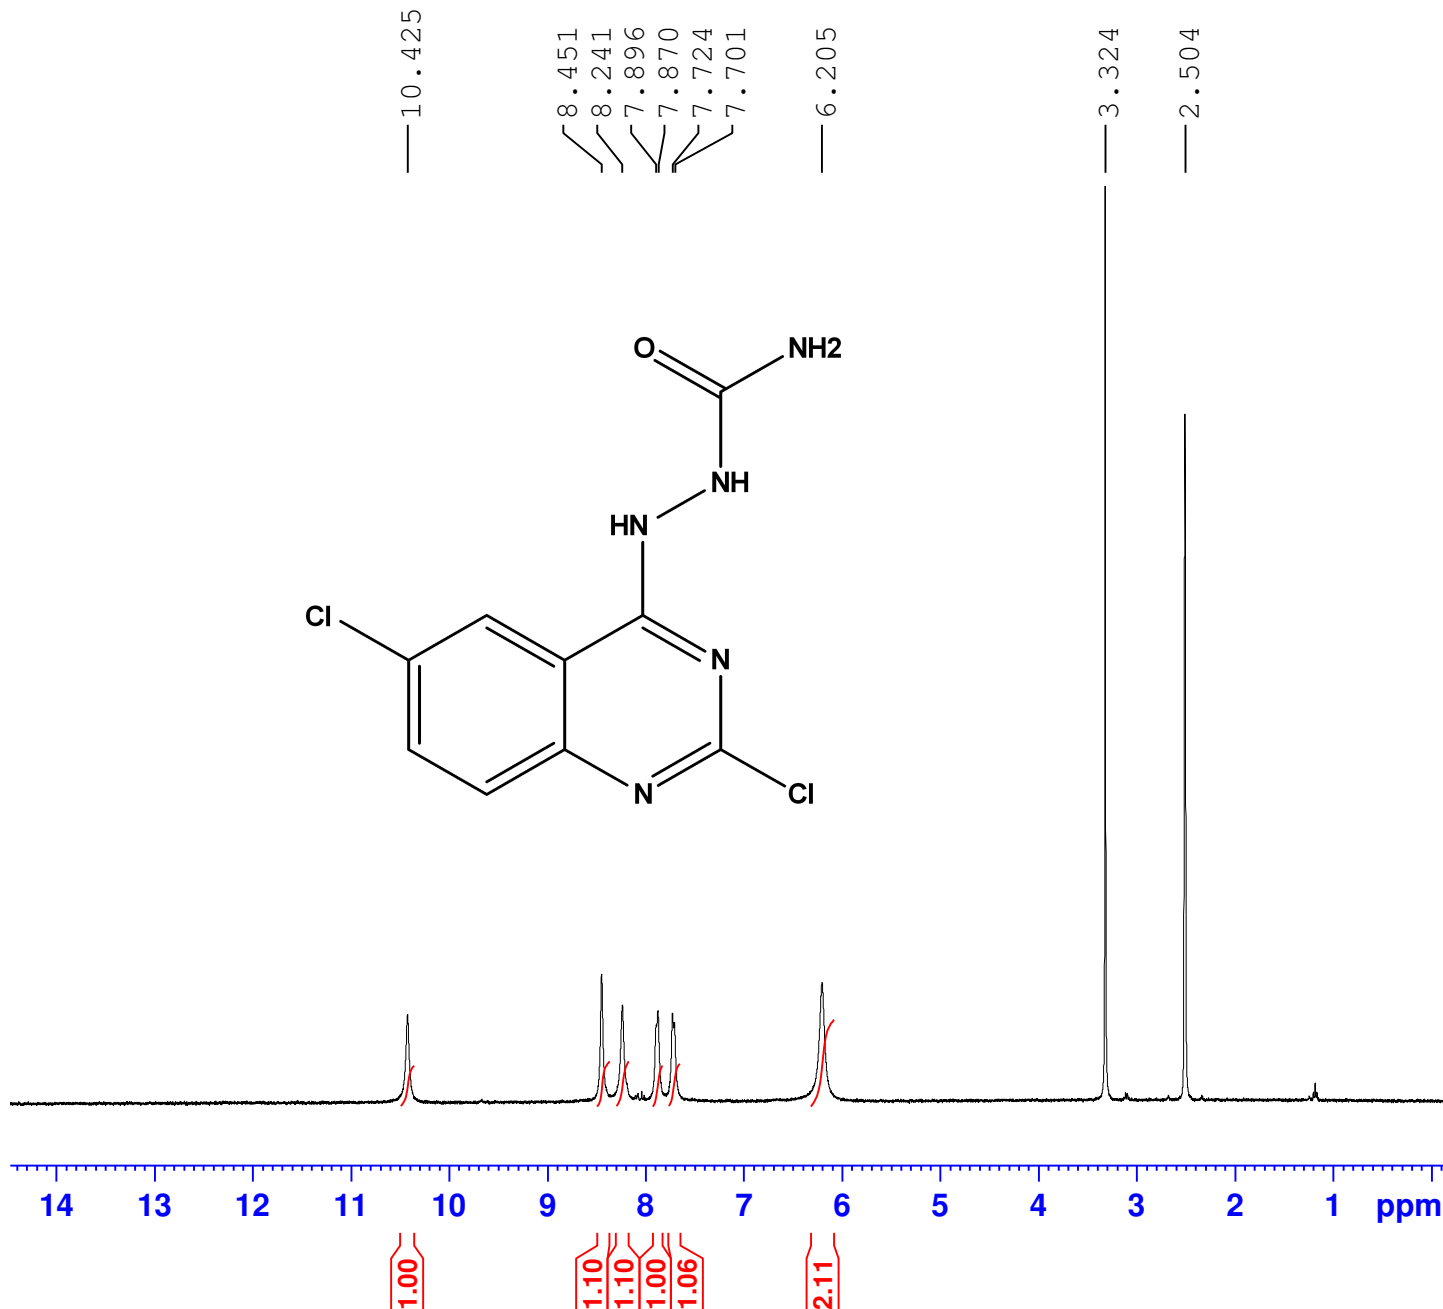

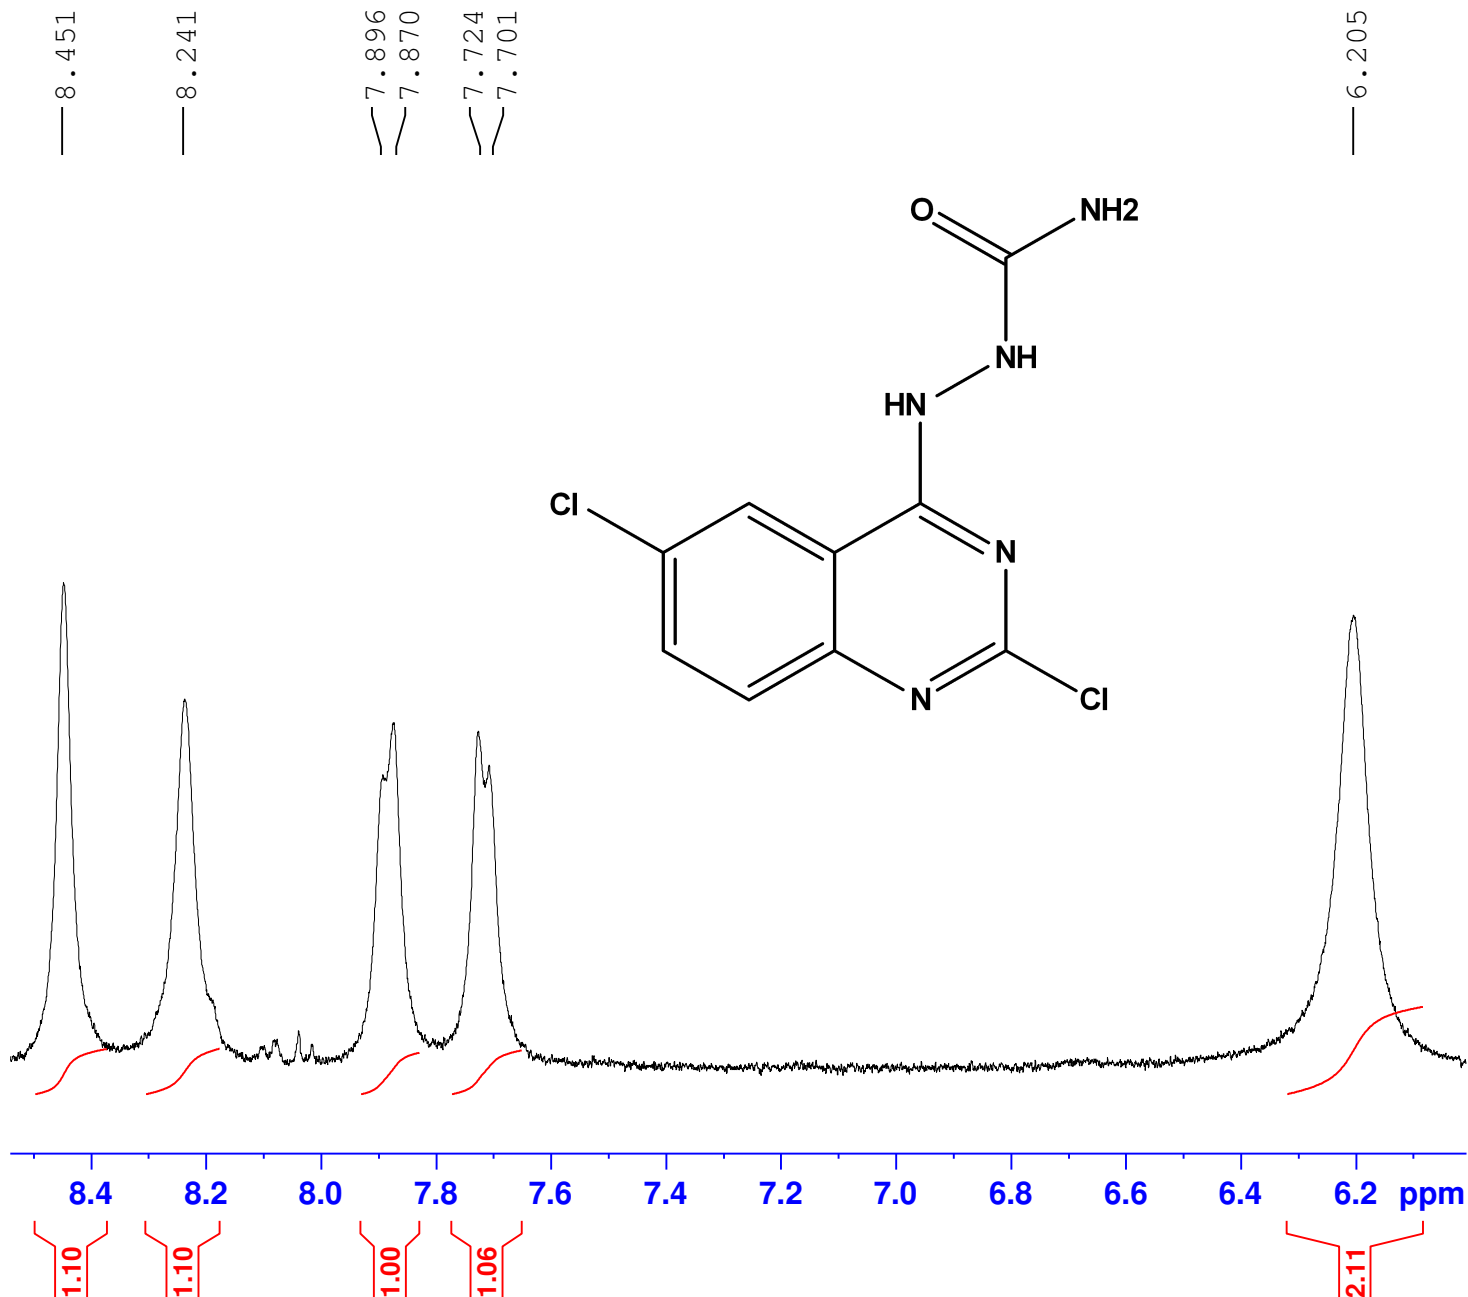

Current Data Parameters  
 NAME anas-ramadan-h2-2  
 EXPNO 1  
 PROCNO 1

F2 - Acquisition Parameters  
 Date\_ 20210401  
 Time 13.44  
 INSTRUM spect  
 PROBHD 5 mm PABBO BB/  
 PULPROG zg30  
 TD 65536  
 SOLVENT DMSO  
 NS 64  
 DS 2  
 SWH 8012.820 Hz  
 FIDRES 0.122266 Hz  
 AQ 4.0894465 sec  
 RG 205.37  
 DW 62.400 usec  
 DE 6.50 usec  
 TE 300.0 K  
 D1 1.00000000 sec  
 TD0 1

===== CHANNEL f1 =====  
 SFO1 400.1524711 MHz  
 NUC1 1H  
 P1 12.00 usec  
 PLW1 18.00000000 W

F2 - Processing parameters  
 SI 65536  
 SF 400.1500000 MHz  
 WDW EM  
 SSB 0  
 LB 0.30 Hz  
 GB 0  
 PC 1.00

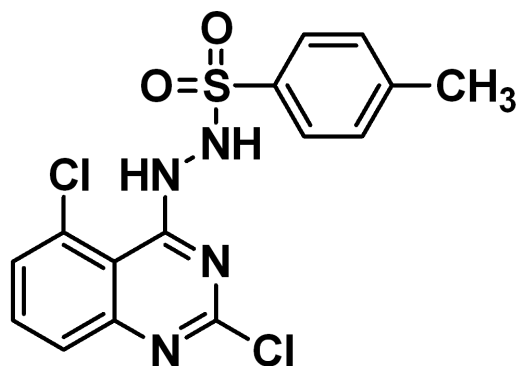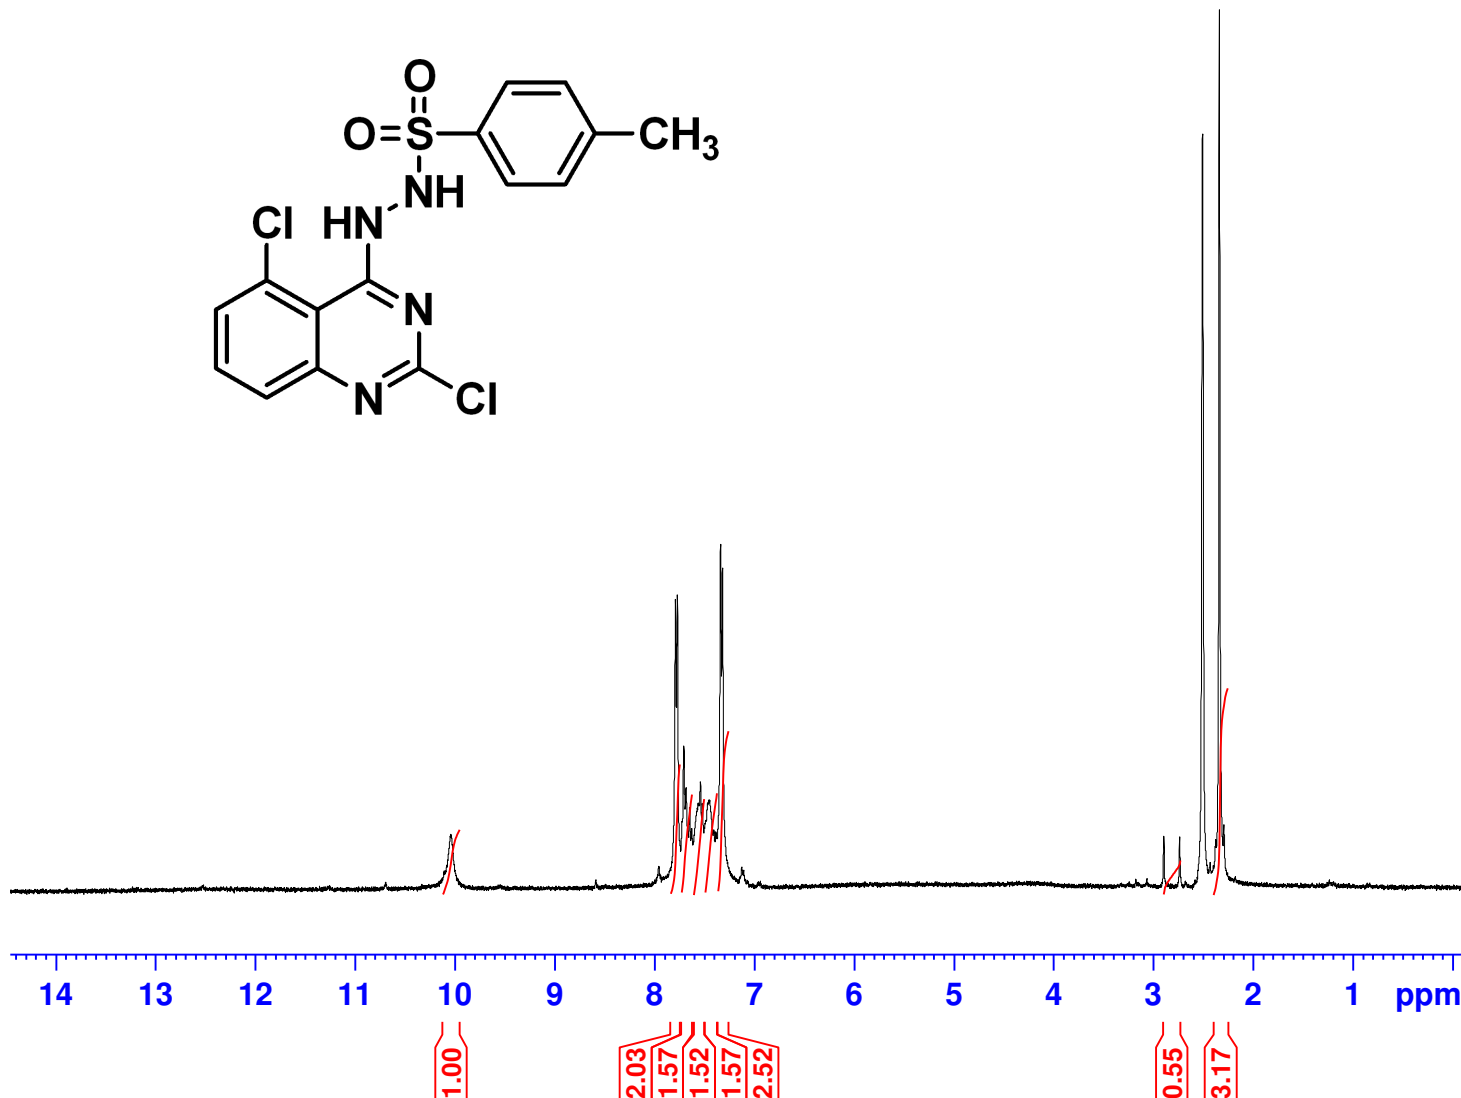

Current Data Parameters  
 NAME albraa-ibrahim-AR18  
 EXPNO 1  
 PROCNO 1

F2 - Acquisition Parameters  
 Date\_ 20210401  
 Time 14.27  
 INSTRUM spect  
 PROBHD 5 mm PABBO BB/  
 PULPROG zg30  
 TD 65536  
 SOLVENT DMSO  
 NS 64  
 DS 2  
 SWH 8012.820 Hz  
 FIDRES 0.122266 Hz  
 AQ 4.0894465 sec  
 RG 205.37  
 DW 62.400 usec  
 DE 6.50 usec  
 TE 300.0 K  
 D1 1.00000000 sec  
 TD0 1

===== CHANNEL f1 =====  
 SFO1 400.1524711 MHz  
 NUC1 1H  
 P1 12.00 usec  
 PLW1 18.00000000 W

F2 - Processing parameters  
 SI 65536  
 SF 400.1500000 MHz  
 WDW EM  
 SSB 0  
 LB 0.30 Hz  
 GB 0  
 PC 1.00



Current Data Parameters  
NAME albraa-ibrahim-AR18  
EXPNO 1  
PROCNO 1

F2 - Acquisition Parameters  
Date\_ 20210401  
Time 14.27  
INSTRUM spect  
PROBHD 5 mm PABBO BB/  
PULPROG zg30  
TD 65536  
SOLVENT DMSO  
NS 64  
DS 2  
SWH 8012.820 Hz  
FIDRES 0.122266 Hz  
AQ 4.0894465 sec  
RG 205.37  
DW 62.400 usec  
DE 6.50 usec  
TE 300.0 K  
D1 1.00000000 sec  
TD0 1

===== CHANNEL f1 =====  
SFO1 400.1524711 MHz  
NUC1 1H  
P1 12.00 usec  
PLW1 18.00000000 W

F2 - Processing parameters  
SI 65536  
SF 400.1500000 MHz  
WDW EM  
SSB 0  
LB 0.30 Hz  
GB 0  
PC 1.00

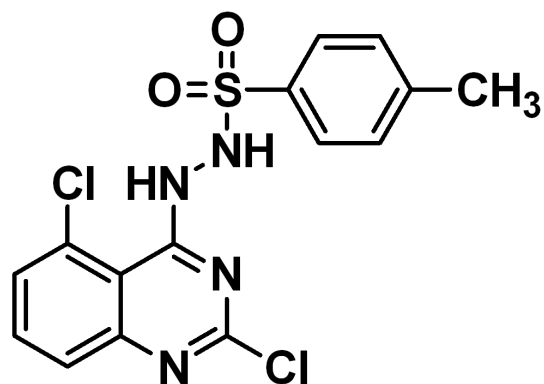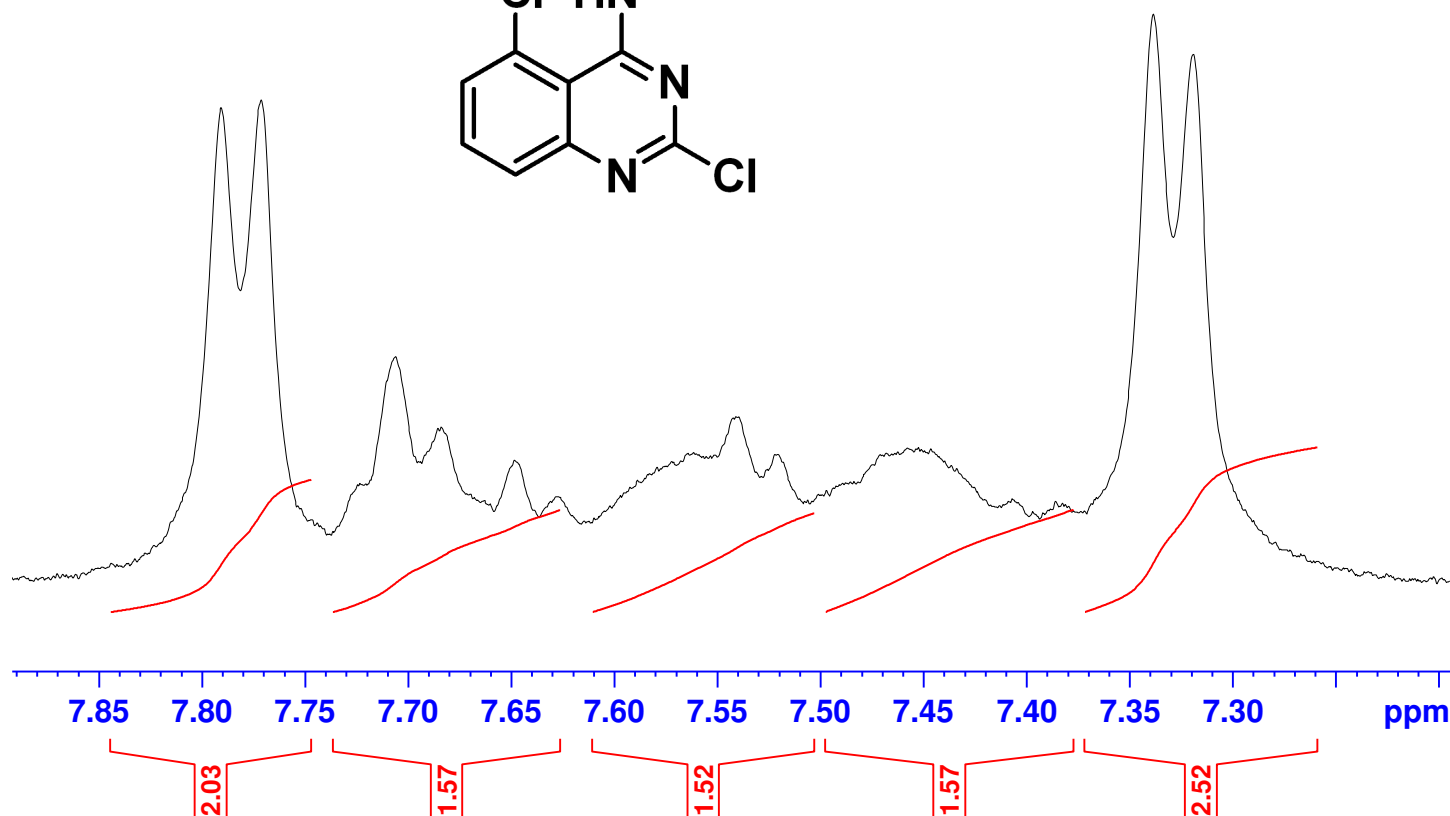

<sup>13</sup>C NMR of 19b

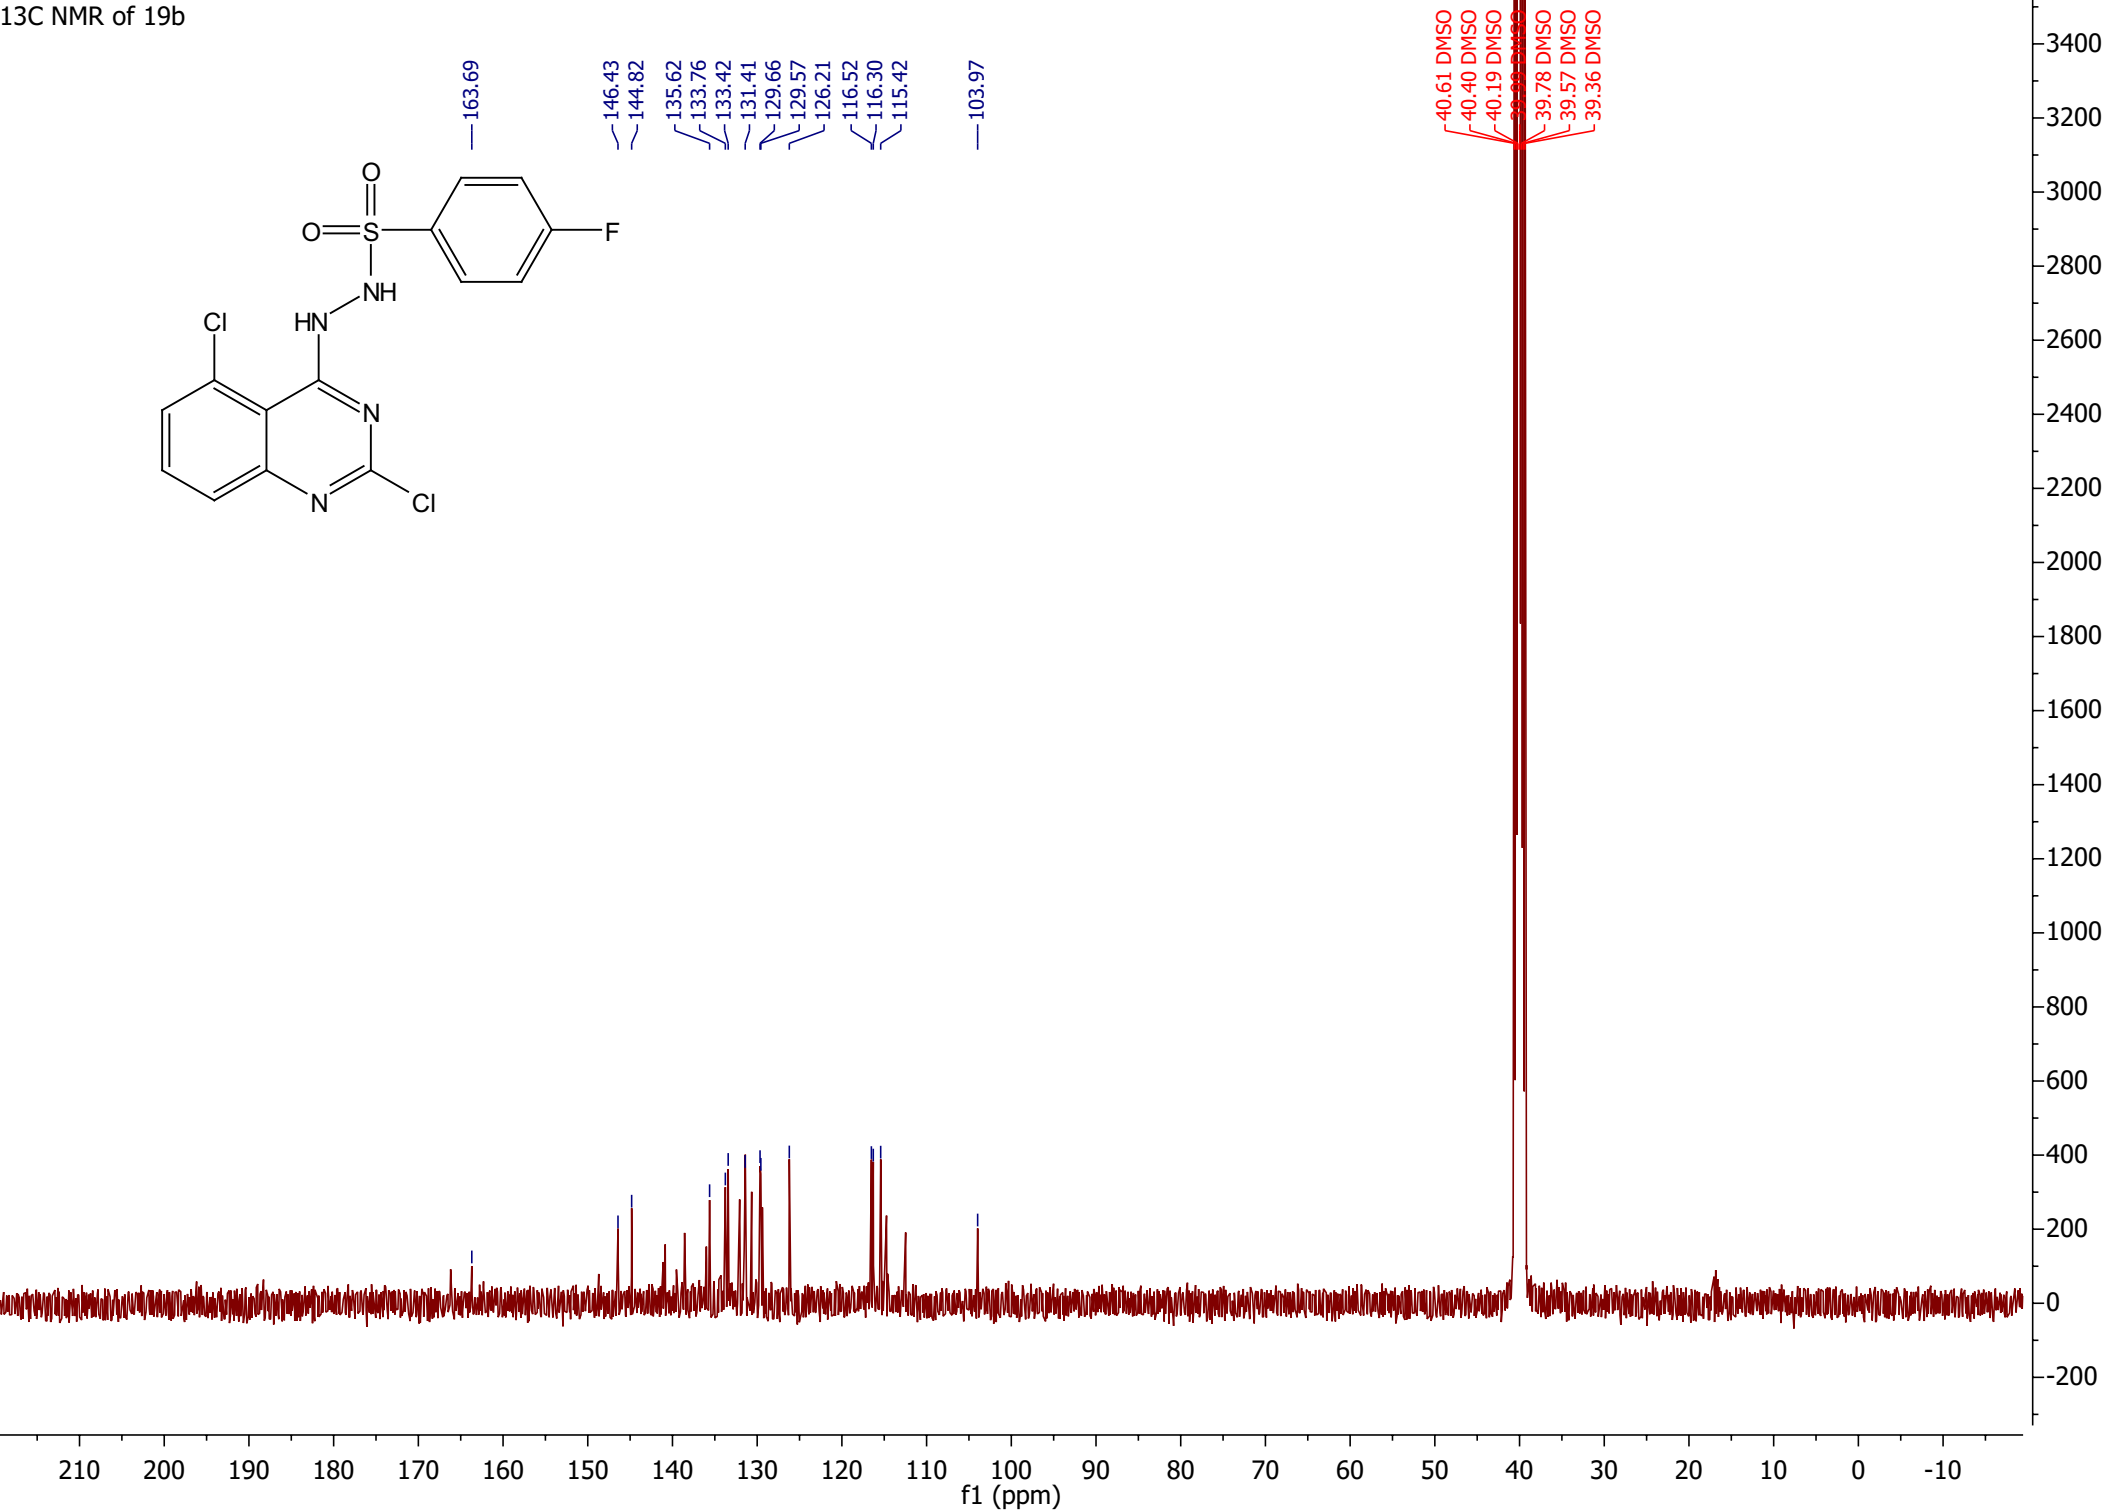

<sup>13</sup>C NMR of 19b

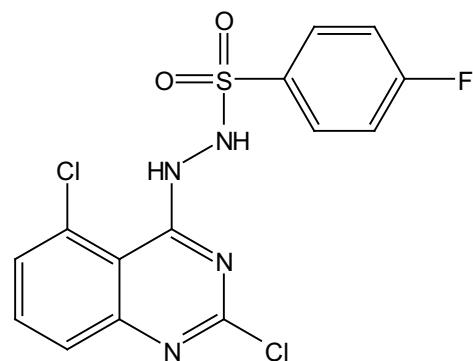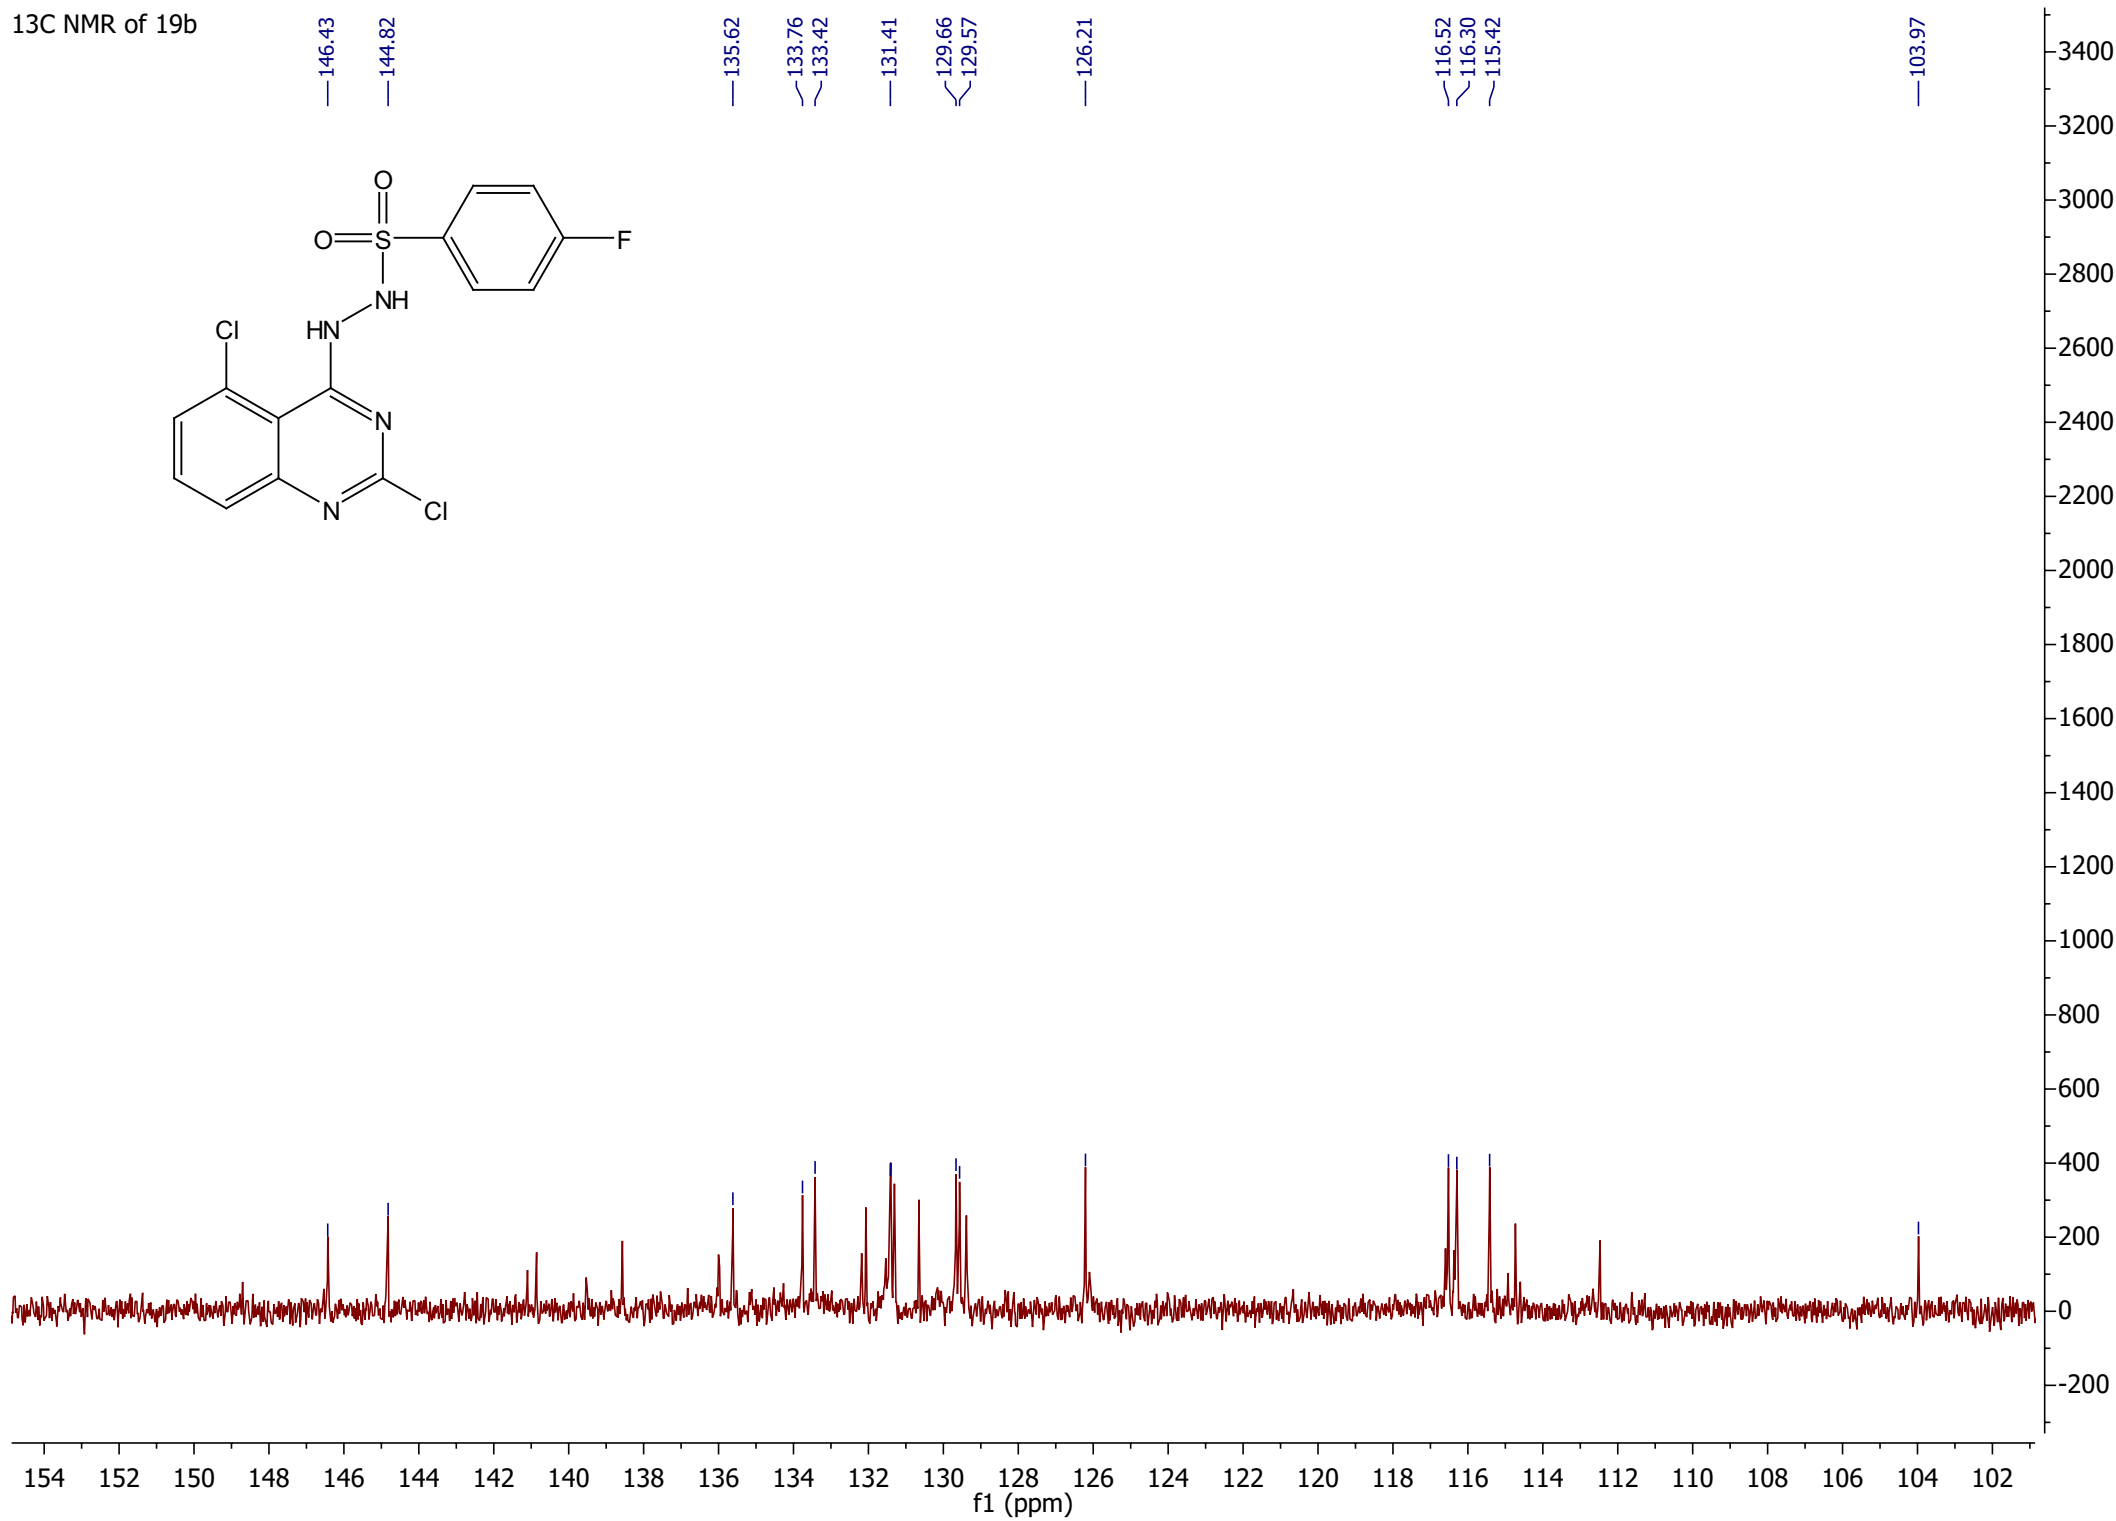



Current Data Parameters  
NAME albraa-ibrahim-AR17  
EXPNO 1  
PROCNO 1

F2 - Acquisition Parameters  
Date\_ 20210401  
Time 14.05  
INSTRUM spect  
PROBHD 5 mm PABBO BB/  
PULPROG zg30  
TD 65536  
SOLVENT DMSO  
NS 64  
DS 2  
SWH 8012.820 Hz  
FIDRES 0.122266 Hz  
AQ 4.0894465 sec  
RG 205.37  
DW 62.400 usec  
DE 6.50 usec  
TE 300.0 K  
D1 1.00000000 sec  
TD0 1

===== CHANNEL f1 =====  
SFO1 400.1524711 MHz  
NUC1 1H  
P1 12.00 usec  
PLW1 18.00000000 W

F2 - Processing parameters  
SI 65536  
SF 400.1500000 MHz  
WDW EM  
SSB 0  
LB 0.30 Hz  
GB 0  
PC 1.00

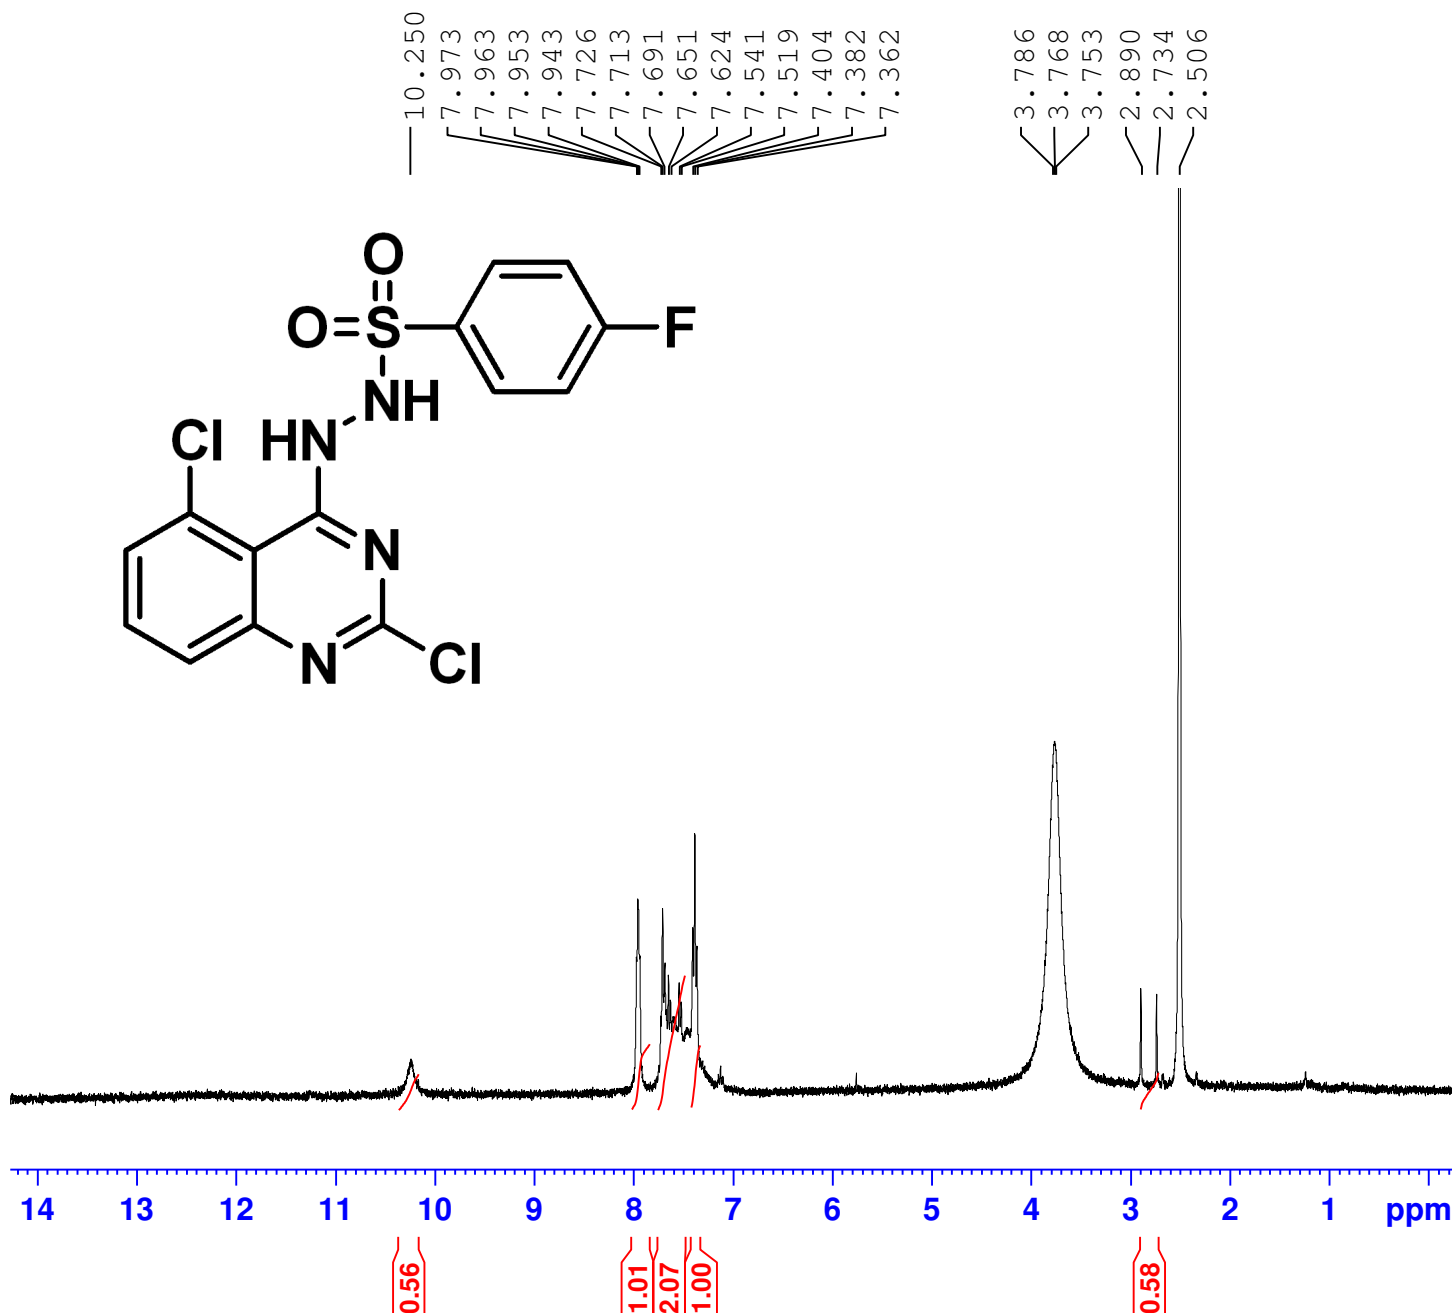

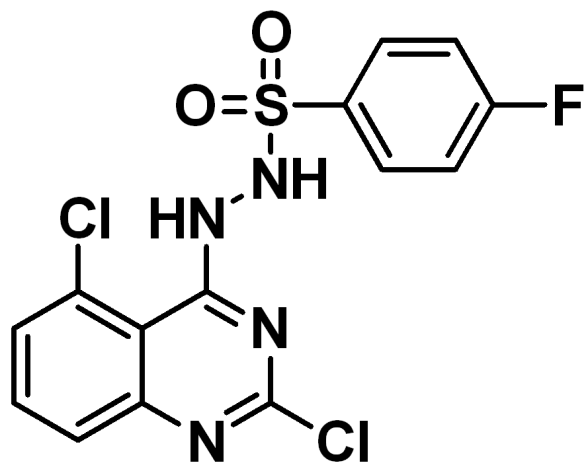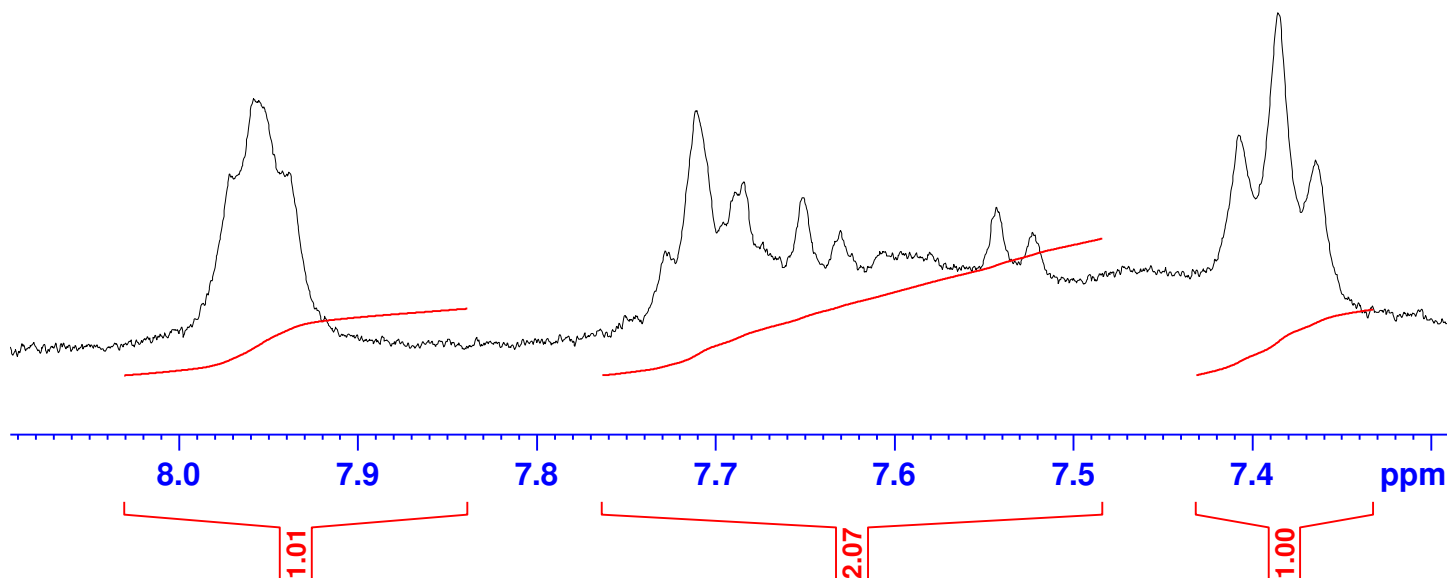

7.973  
7.963  
7.953  
7.943

7.726  
7.713  
7.691

7.651  
7.624

7.541  
7.519

7.404  
7.382  
7.362



Current Data Parameters  
NAME albraa-ibrahim-AR17  
EXPNO 1  
PROCNO 1

F2 - Acquisition Parameters  
Date\_ 20210401  
Time 14.05  
INSTRUM spect  
PROBHD 5 mm PABBO BB/  
PULPROG zg30  
TD 65536  
SOLVENT DMSO  
NS 64  
DS 2  
SWH 8012.820 Hz  
FIDRES 0.122266 Hz  
AQ 4.0894465 sec  
RG 205.37  
DW 62.400 usec  
DE 6.50 usec  
TE 300.0 K  
D1 1.00000000 sec  
TD0 1

===== CHANNEL f1 =====  
SFO1 400.1524711 MHz  
NUC1 1H  
P1 12.00 usec  
PLW1 18.00000000 W

F2 - Processing parameters  
SI 65536  
SF 400.1500000 MHz  
WDW EM  
SSB 0  
LB 0.30 Hz  
GB 0  
PC 1.00

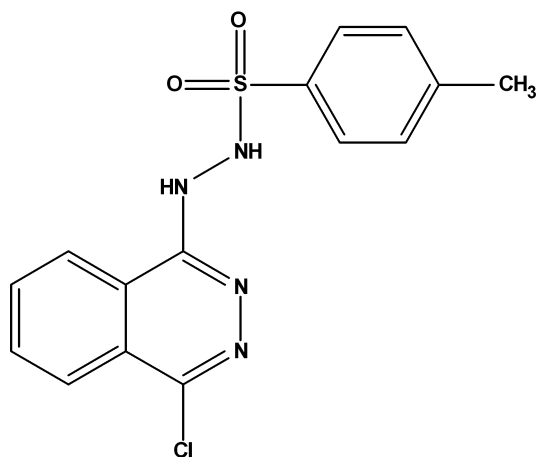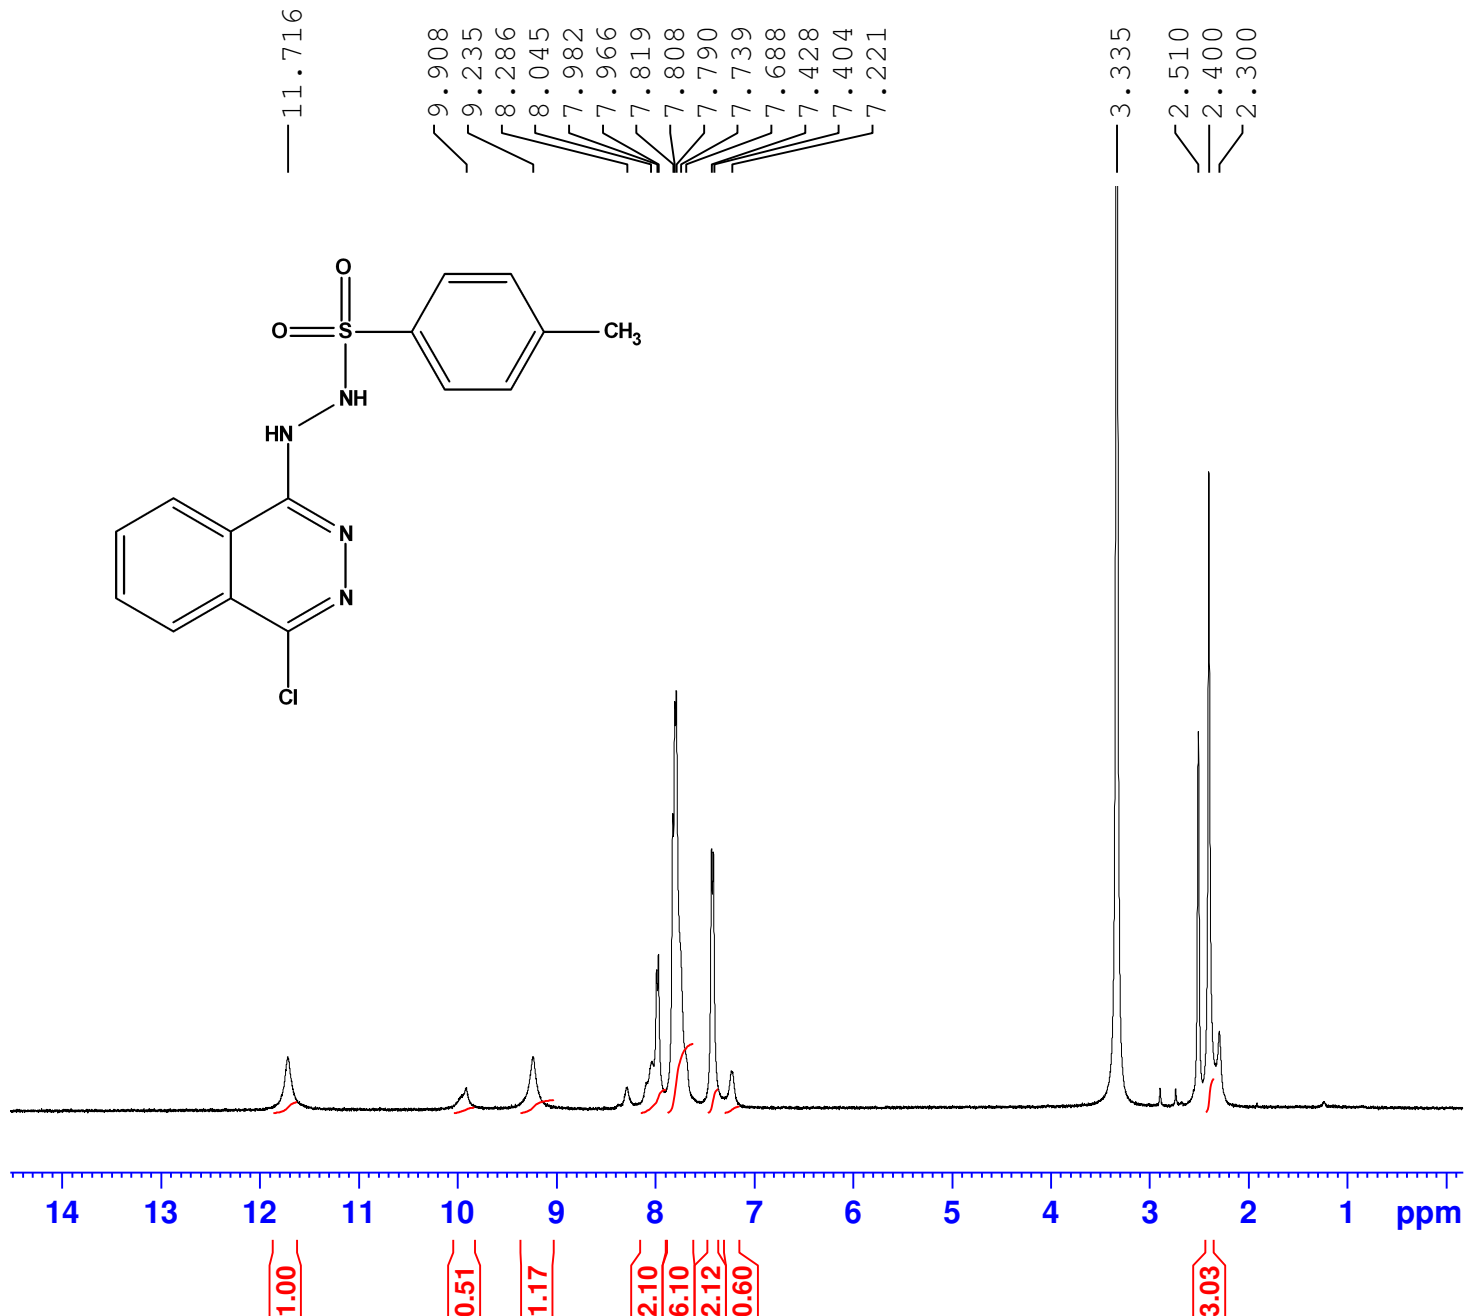

Current Data Parameters  
 NAME Anas ramdan-AR11  
 EXPNO 1  
 PROCNO 1

F2 - Acquisition Parameters  
 Date\_ 20210228  
 Time 15.37  
 INSTRUM spect  
 PROBHD 5 mm PABBO BB/  
 PULPROG zg30  
 TD 65536  
 SOLVENT DMSO  
 NS 51  
 DS 2  
 SWH 8012.820 Hz  
 FIDRES 0.122266 Hz  
 AQ 4.0894465 sec  
 RG 205.37  
 DW 62.400 usec  
 DE 6.50 usec  
 TE 300.0 K  
 D1 1.00000000 sec  
 TD0 1

===== CHANNEL f1 =====  
 SFO1 400.1524711 MHz  
 NUC1 1H  
 P1 12.00 usec  
 PLW1 18.00000000 W

F2 - Processing parameters  
 SI 65536  
 SF 400.1500000 MHz  
 WDW EM  
 SSB 0  
 LB 0.30 Hz  
 GB 0  
 PC 1.00



Current Data Parameters  
NAME Anas ramdan-AR11  
EXPNO 1  
PROCNO 1

F2 - Acquisition Parameters  
Date\_ 20210228  
Time 15.37  
INSTRUM spect  
PROBHD 5 mm PABBO BB/  
PULPROG zg30  
TD 65536  
SOLVENT DMSO  
NS 51  
DS 2  
SWH 8012.820 Hz  
FIDRES 0.122266 Hz  
AQ 4.0894465 sec  
RG 205.37  
DW 62.400 usec  
DE 6.50 usec  
TE 300.0 K  
D1 1.00000000 sec  
TD0 1

===== CHANNEL f1 =====  
SFO1 400.1524711 MHz  
NUC1 1H  
P1 12.00 usec  
PLW1 18.00000000 W

F2 - Processing parameters  
SI 65536  
SF 400.1500000 MHz  
WDW EM  
SSB 0  
LB 0.30 Hz  
GB 0  
PC 1.00

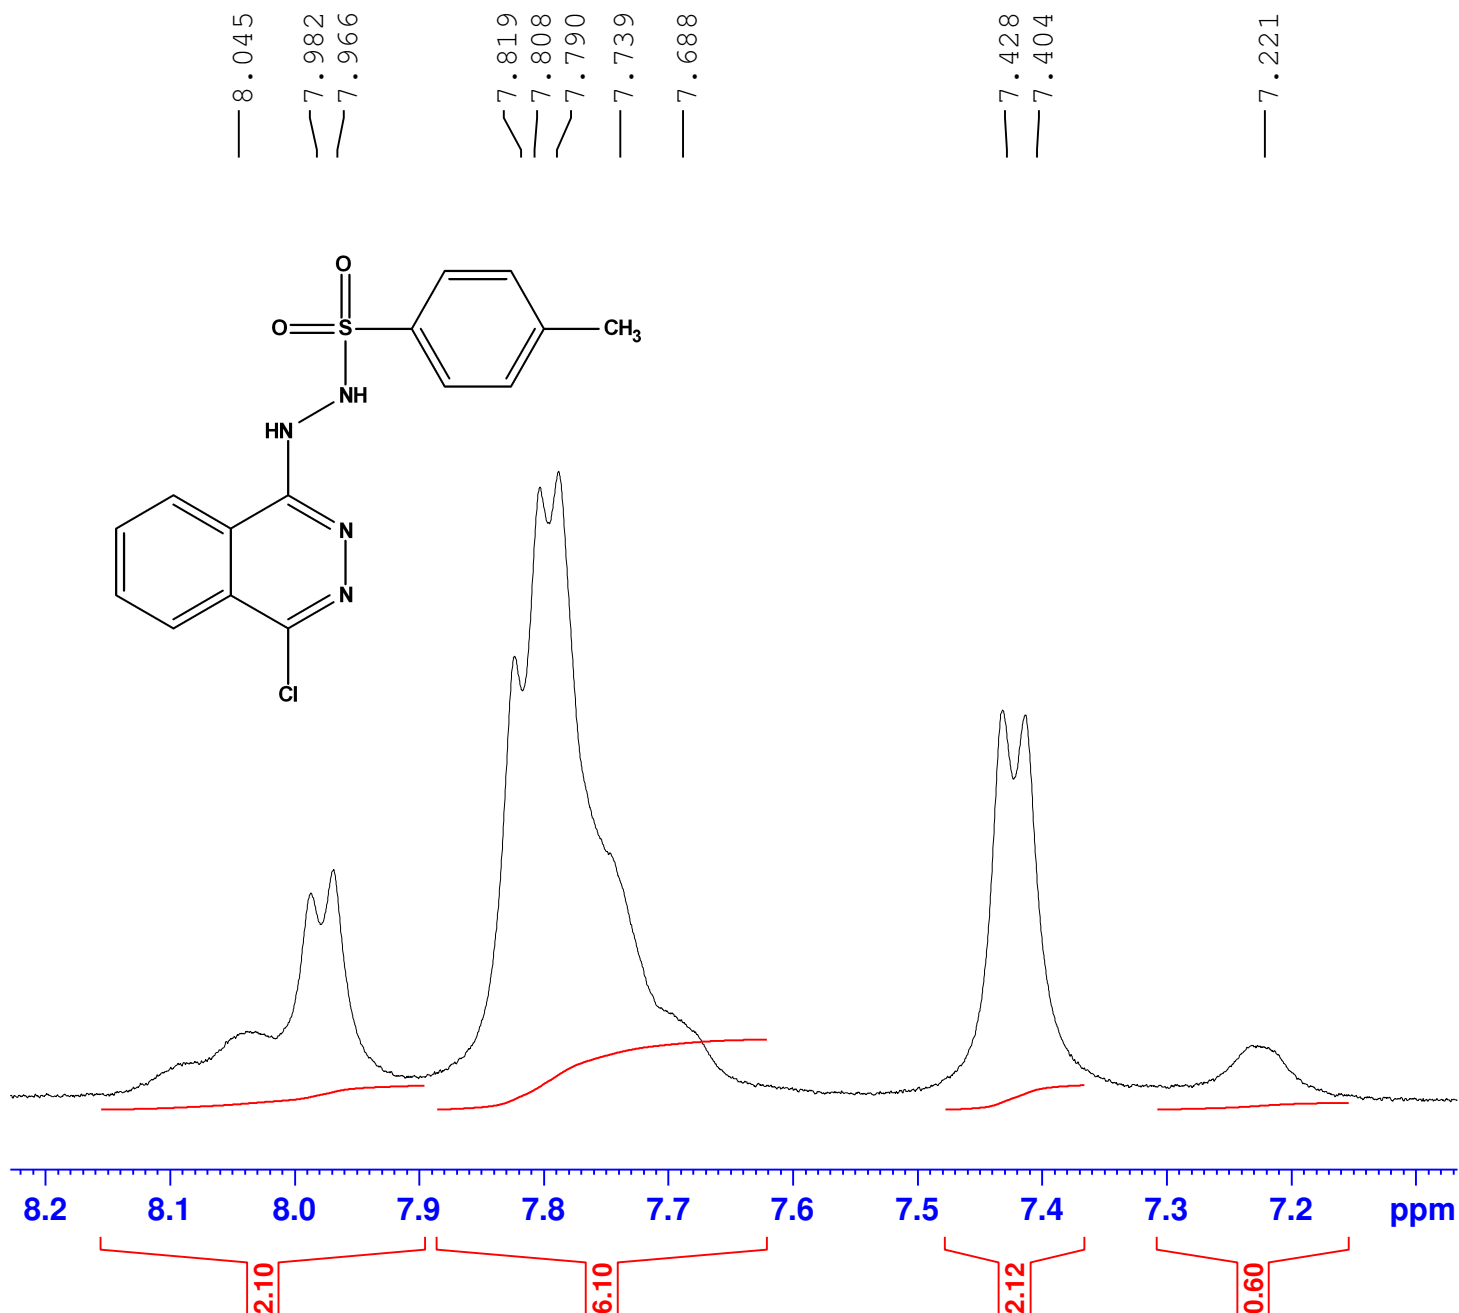

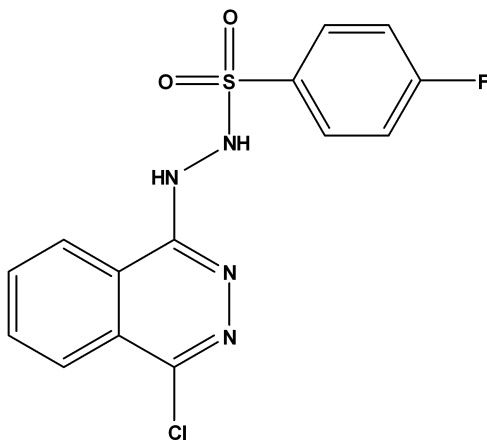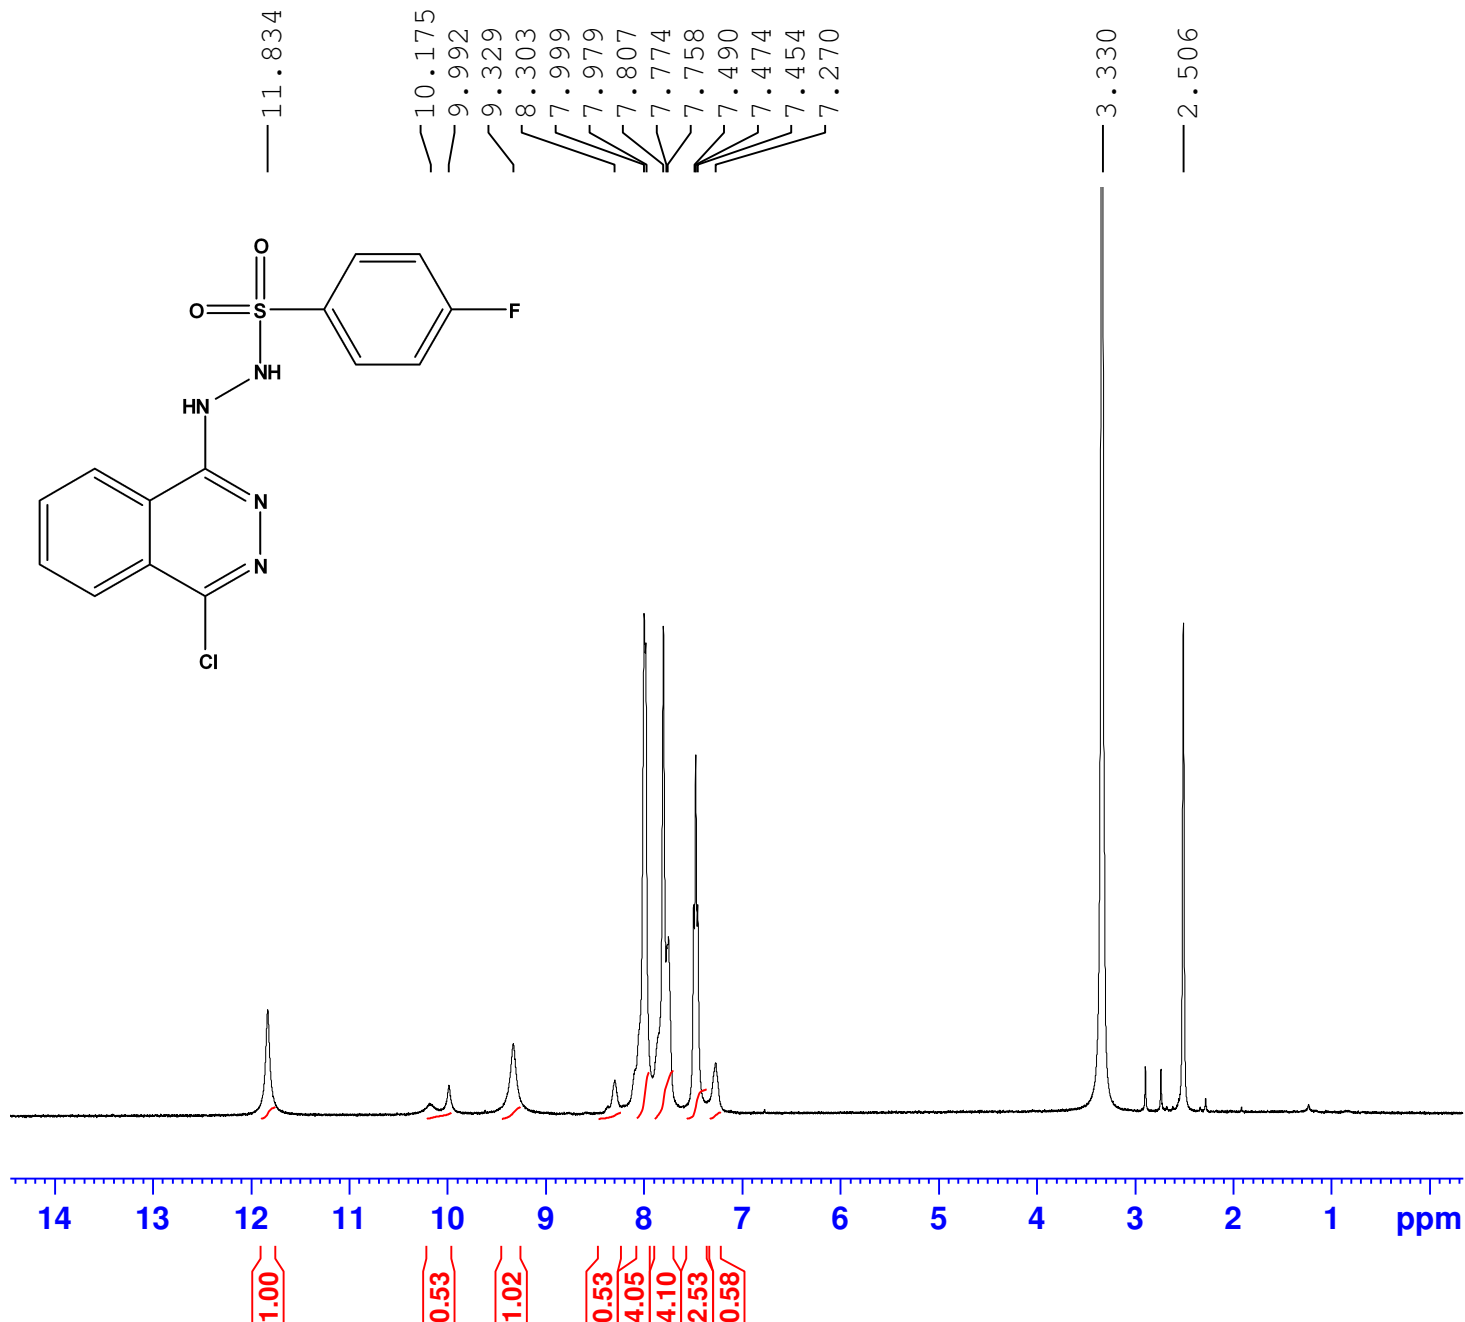

Current Data Parameters  
 NAME Anas ramdan-AR10  
 EXPNO 1  
 PROCNO 1

F2 - Acquisition Parameters  
 Date\_ 20210228  
 Time 15.29  
 INSTRUM spect  
 PROBHD 5 mm PABBO BB/  
 PULPROG zg30  
 TD 65536  
 SOLVENT DMSO  
 NS 102  
 DS 2  
 SWH 8012.820 Hz  
 FIDRES 0.122266 Hz  
 AQ 4.0894465 sec  
 RG 205.37  
 DW 62.400 usec  
 DE 6.50 usec  
 TE 300.0 K  
 D1 1.00000000 sec  
 TD0 1

===== CHANNEL f1 =====  
 SFO1 400.1524711 MHz  
 NUC1 1H  
 P1 12.00 usec  
 PLW1 18.00000000 W

F2 - Processing parameters  
 SI 65536  
 SF 400.1500000 MHz  
 WDW EM  
 SSB 0  
 LB 0.30 Hz  
 GB 0  
 PC 1.00

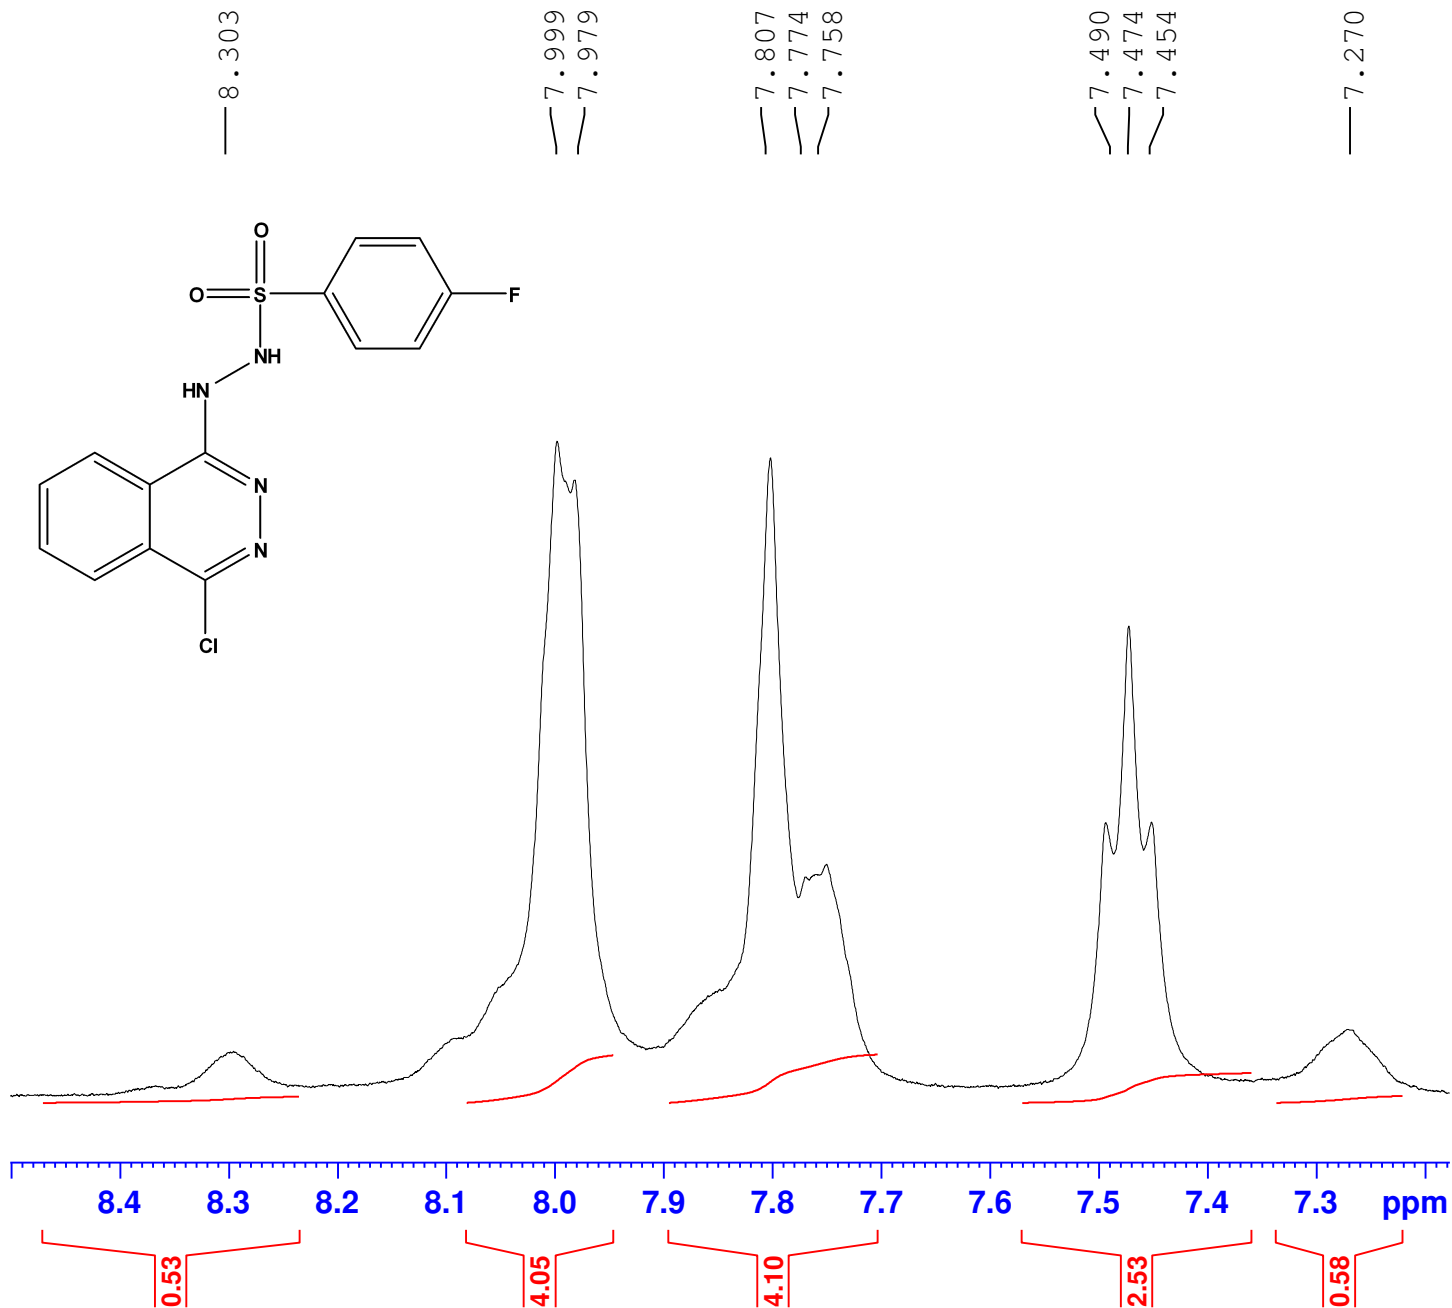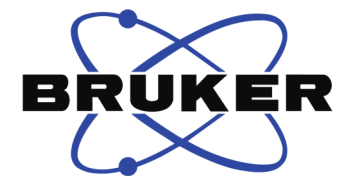

Current Data Parameters  
 NAME Anas ramdan-AR10  
 EXPNO 1  
 PROCNO 1

F2 - Acquisition Parameters  
 Date\_ 20210228  
 Time 15.29  
 INSTRUM spect  
 PROBHD 5 mm PABBO BB/  
 PULPROG zg30  
 TD 65536  
 SOLVENT DMSO  
 NS 102  
 DS 2  
 SWH 8012.820 Hz  
 FIDRES 0.122266 Hz  
 AQ 4.0894465 sec  
 RG 205.37  
 DW 62.400 usec  
 DE 6.50 usec  
 TE 300.0 K  
 D1 1.00000000 sec  
 TD0 1

===== CHANNEL f1 =====  
 SFO1 400.1524711 MHz  
 NUC1 1H  
 P1 12.00 usec  
 PLW1 18.00000000 W

F2 - Processing parameters  
 SI 65536  
 SF 400.1500000 MHz  
 WDW EM  
 SSB 0  
 LB 0.30 Hz  
 GB 0  
 PC 1.00

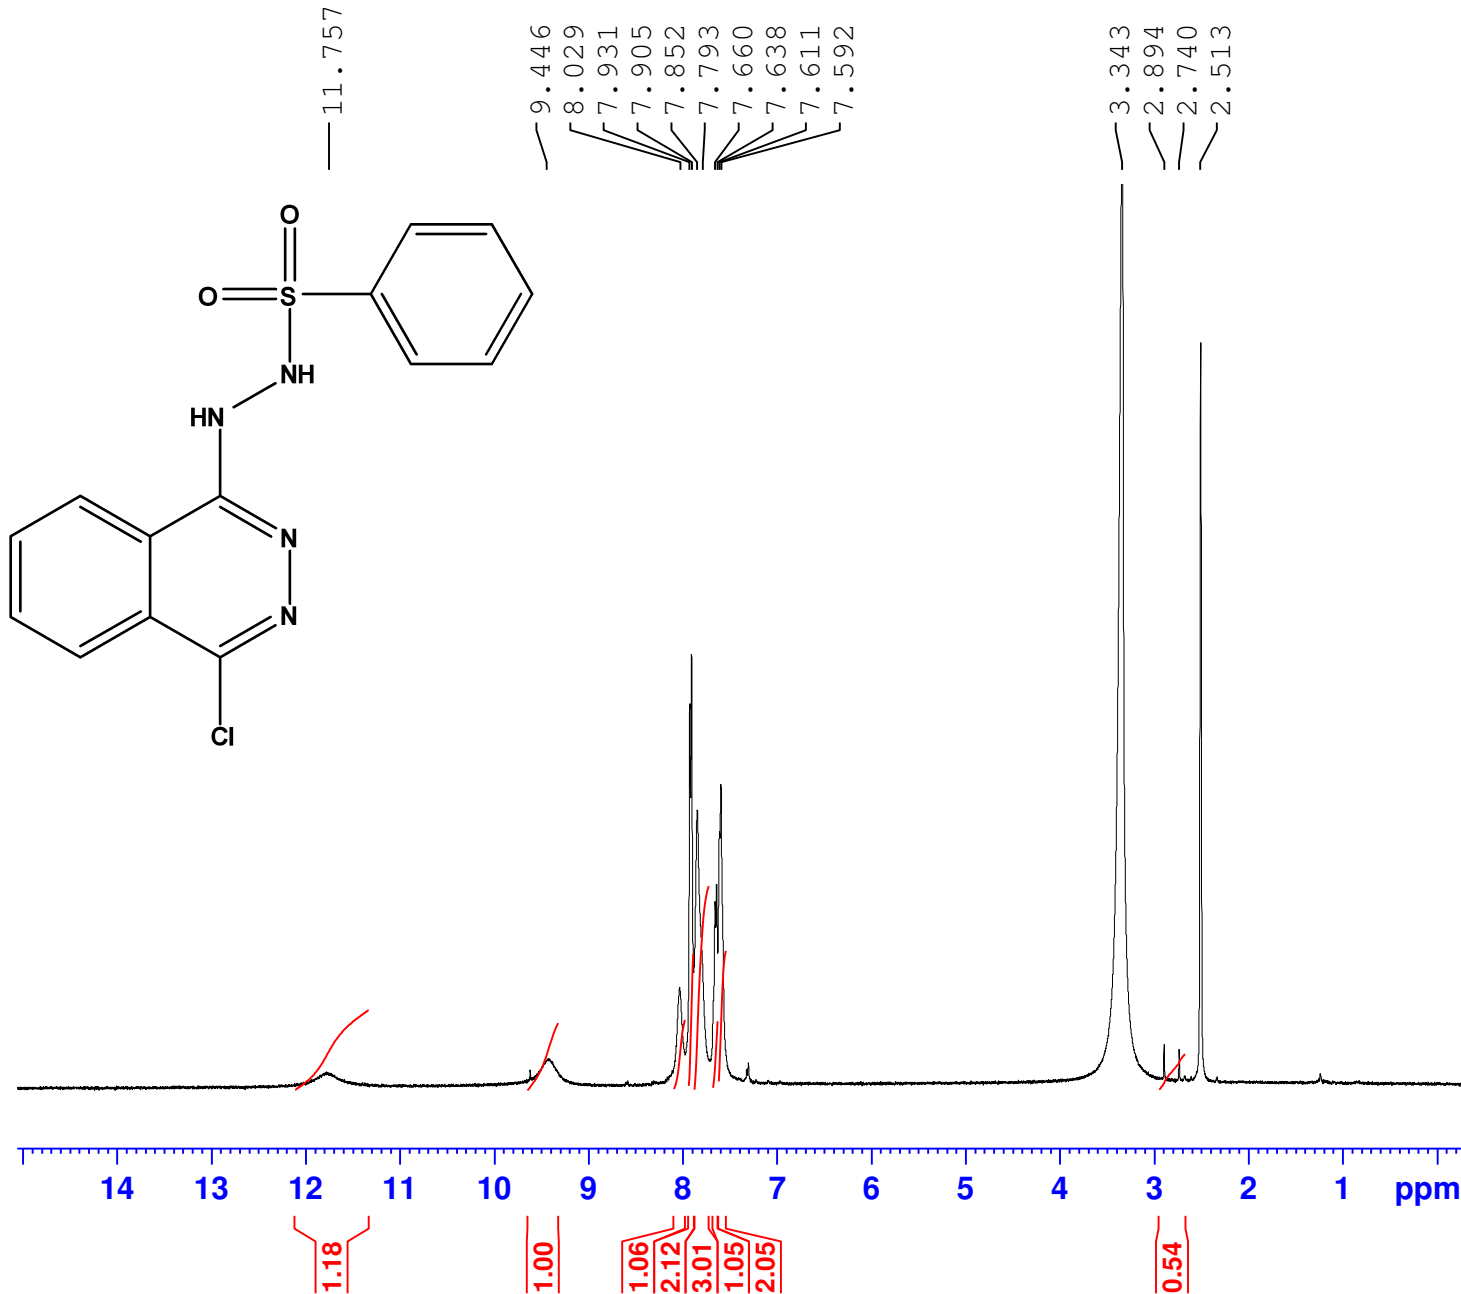

Current Data Parameters  
 NAME Anas ramdan-AR12  
 EXPNO 1  
 PROCNO 1

F2 - Acquisition Parameters  
 Date\_ 20210228  
 Time 15.47  
 INSTRUM spect  
 PROBHD 5 mm PABBO BB/  
 PULPROG zg30  
 TD 65536  
 SOLVENT DMSO  
 NS 86  
 DS 2  
 SWH 8012.820 Hz  
 FIDRES 0.122266 Hz  
 AQ 4.0894465 sec  
 RG 205.37  
 DW 62.400 usec  
 DE 6.50 usec  
 TE 300.0 K  
 D1 1.00000000 sec  
 TD0 1

===== CHANNEL f1 =====  
 SFO1 400.1524711 MHz  
 NUC1 1H  
 P1 12.00 usec  
 PLW1 18.00000000 W

F2 - Processing parameters  
 SI 65536  
 SF 400.1500000 MHz  
 WDW EM  
 SSB 0  
 LB 0.30 Hz  
 GB 0  
 PC 1.00

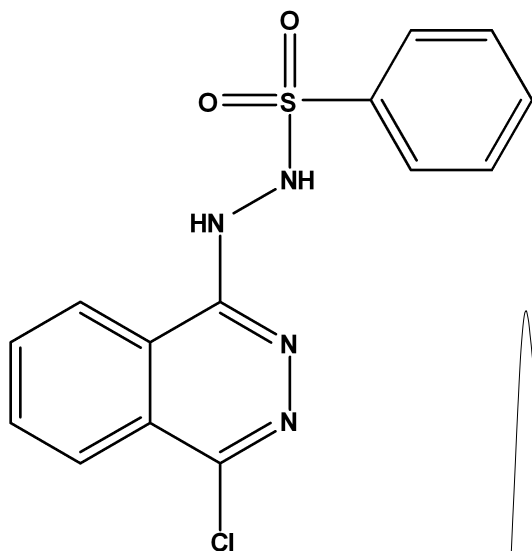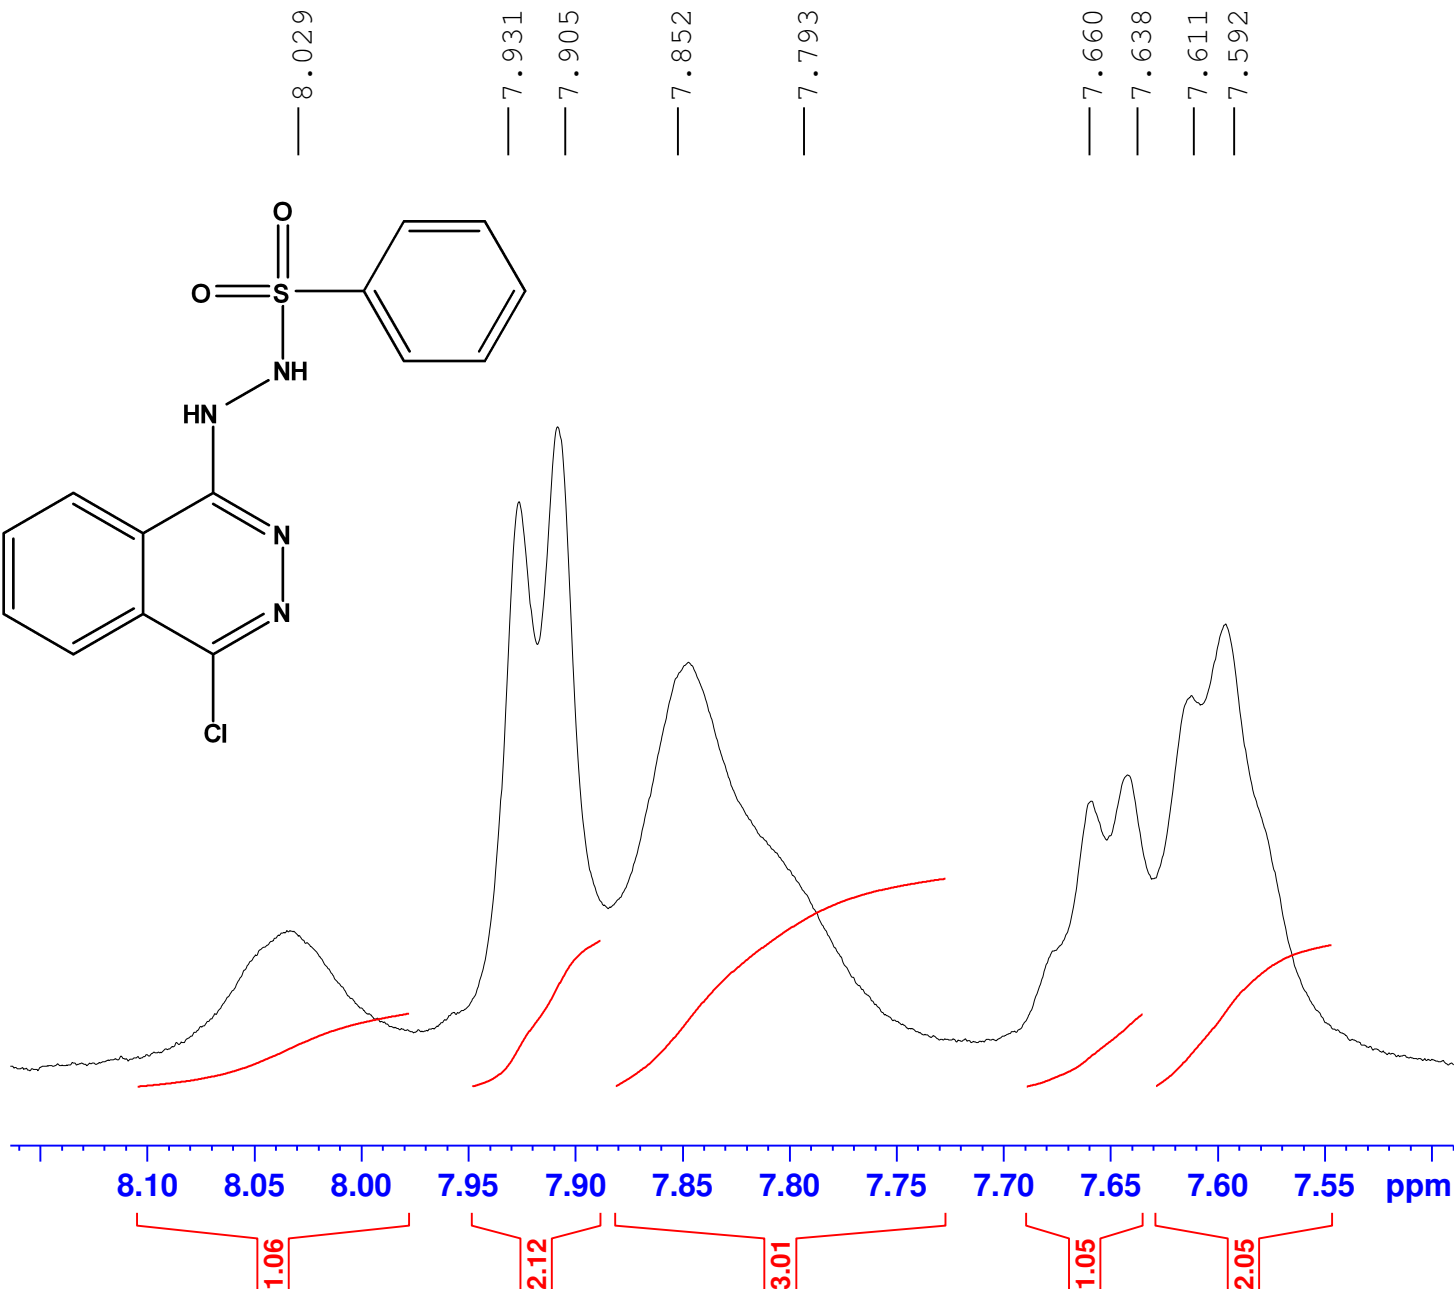

Current Data Parameters  
 NAME Anas ramdan-AR12  
 EXPNO 1  
 PROCNO 1

F2 - Acquisition Parameters  
 Date\_ 20210228  
 Time 15.47  
 INSTRUM spect  
 PROBHD 5 mm PABBO BB/  
 PULPROG zg30  
 TD 65536  
 SOLVENT DMSO  
 NS 86  
 DS 2  
 SWH 8012.820 Hz  
 FIDRES 0.122266 Hz  
 AQ 4.0894465 sec  
 RG 205.37  
 DW 62.400 usec  
 DE 6.50 usec  
 TE 300.0 K  
 D1 1.00000000 sec  
 TD0 1

===== CHANNEL f1 =====  
 SFO1 400.1524711 MHz  
 NUC1 1H  
 P1 12.00 usec  
 PLW1 18.00000000 W

F2 - Processing parameters  
 SI 65536  
 SF 400.1500000 MHz  
 WDW EM  
 SSB 0  
 LB 0.30 Hz  
 GB 0  
 PC 1.00

## Mass spec. of 7b

Hazem-Osama-AR9 #54-63 RT: 0.92-1.07 AV: 10 SB: 2 2.44 , 2.44 NL: 8.08E1  
T: + c EI Full ms [40.00-1000.00]

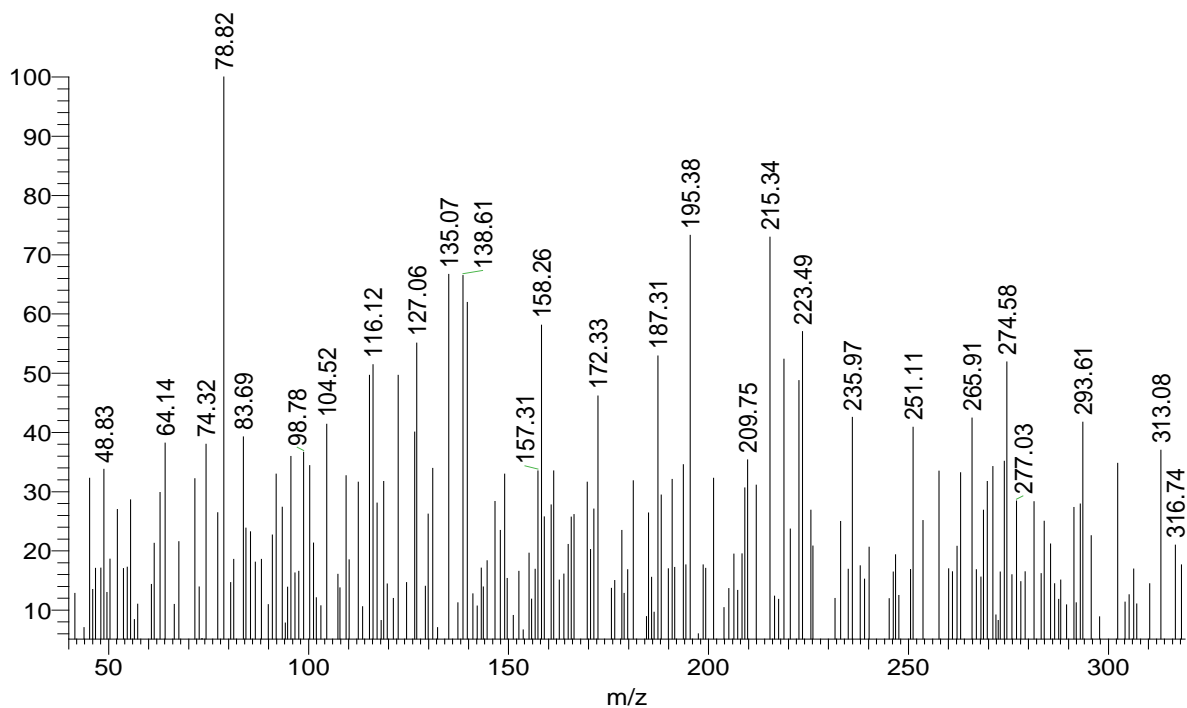

## Mass spec. of 11a

Hazem-Osama-AR15 #125-129 RT: 2.11-2.18 AV: 5 SB: 6 2.73 , 2.48-2.54 NL: 1.65E2  
T: + c EI Full ms [40.00-1000.00]

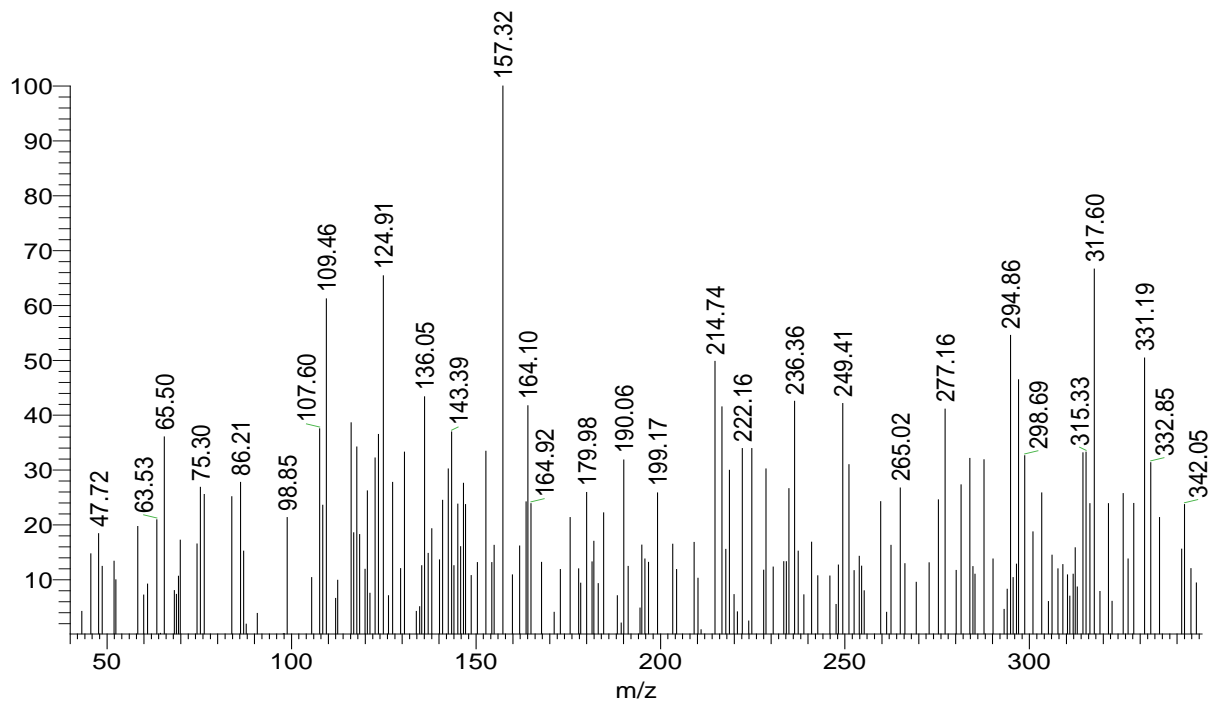

## Mass spec. of 11b

Hazem-Osama-H2-3 #107 RT: 1.81 AV: 1 SB: 6 2.79 , 2.48-2.54 NL: 3.21E3  
T: + c EI Full ms [40.00-1000.00]

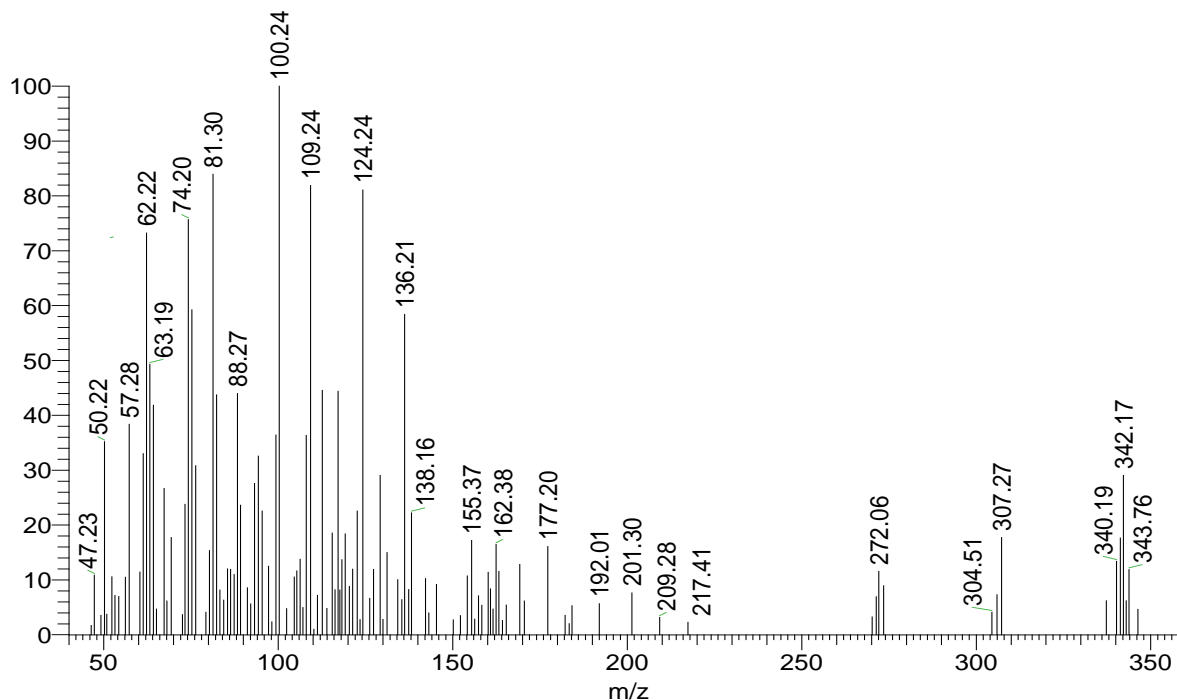

## Mass spec. of 13b

Hazem-Osama-H2-1 #126 RT: 2.13 AV: 1 SB: 6 2.56 , 2.48-2.54 NL: 3.17E2  
T: + c EI Full ms [40.00-1000.00]

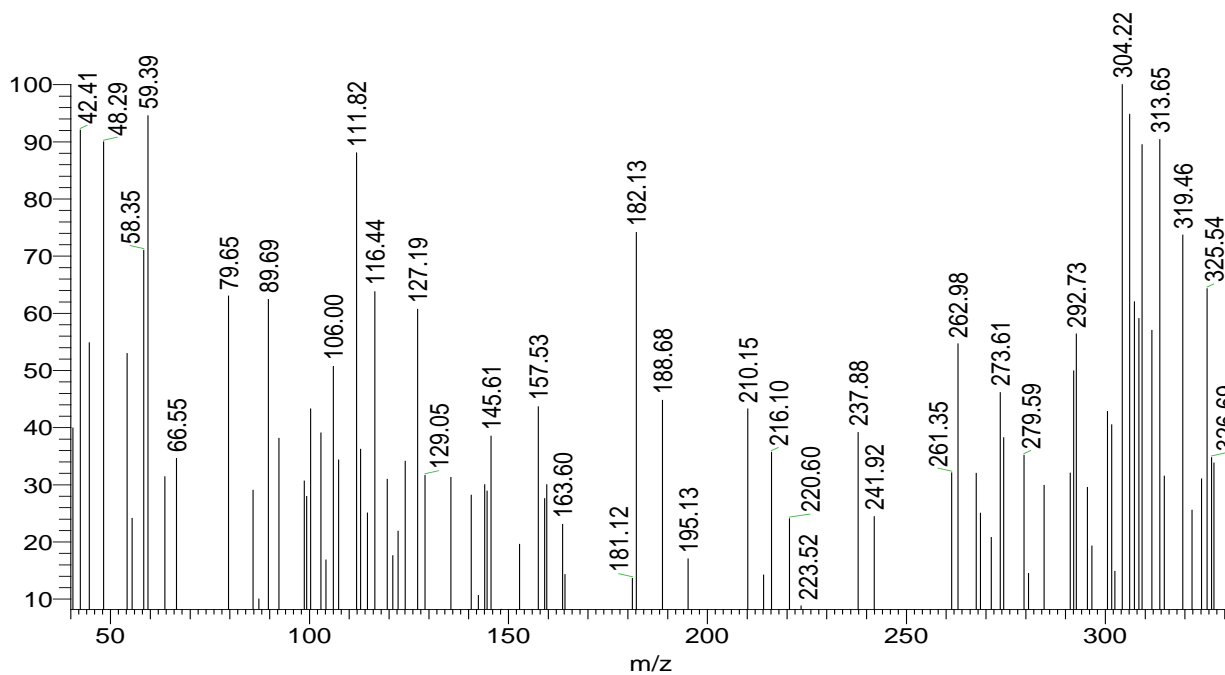

## Mass spec. of 15b

Hazem-Osama-H2-2\_20220731103618 #48-55 RT: 0.82-0.94 AV: 8 SB: 2 2.38 , 2.38 NL: 1.13E2  
T: + c EI Full ms [40.00-1000.00]

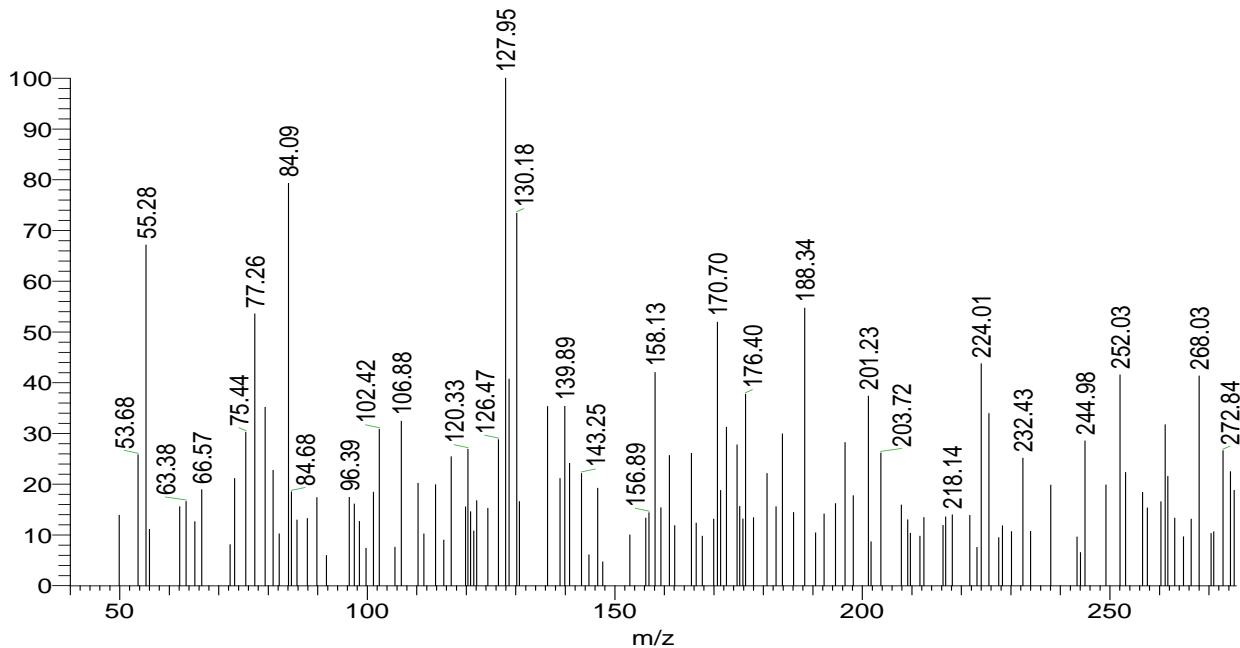

## Mass spec. of 19b

Hazem-Osama-AR17 #38 RT: 0.65 AV: 1 SB: 6 2.79 , 2.48-2.54 NL: 5.69E2  
T: + c EI Full ms [40.00-1000.00]

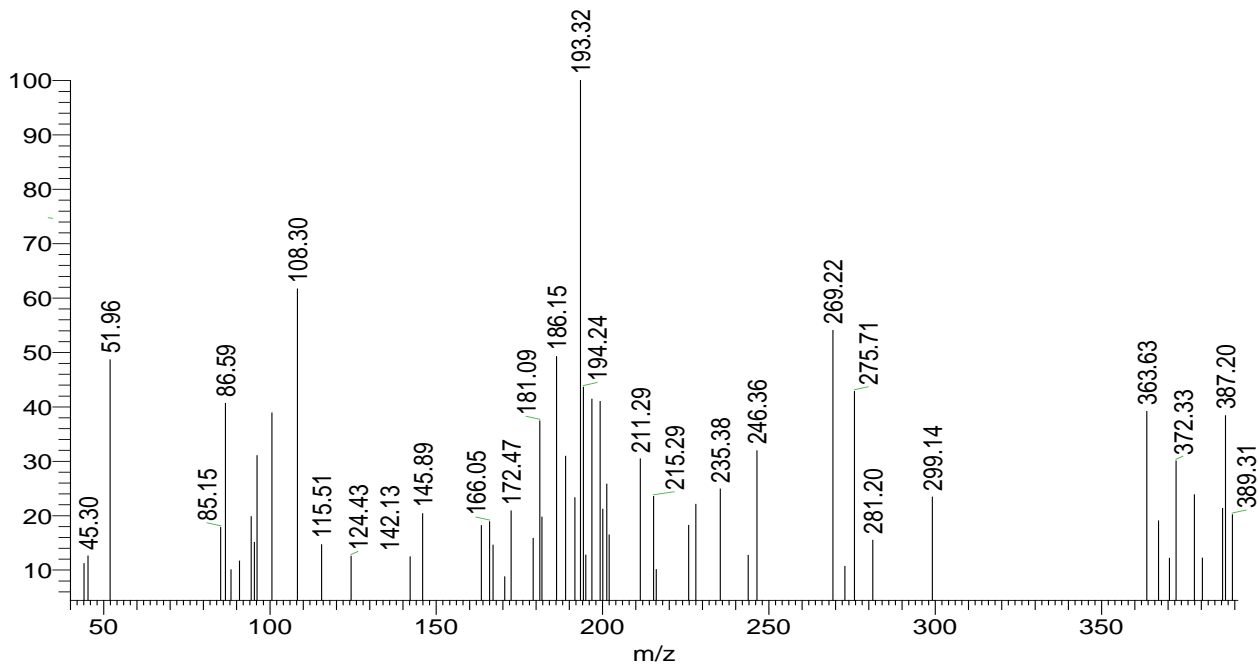

# Al-Azhar University

## The Regional Center for Mycology and Biotechnology

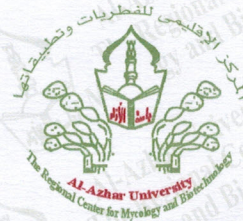

### Requester Data:

**Name:** Dr. Anas Ramadan Abdel-Sattar Qotb

**Authority:** Faculty of Pharmacy, Al-Azhar University

### Sample Data:

Sixteen samples had been submitted for elemental analysis.

### Analysis Report:

| Sample Code | C%    | H%   | N%    |
|-------------|-------|------|-------|
| AR1         | 58.41 | 5.40 | 14.61 |
| AR2         | 53.72 | 5.49 | 16.98 |
| AR3         | 55.35 | 5.98 | 16.30 |
| AR5         | 59.63 | 5.81 | 13.97 |
| AR6         | 65.18 | 4.96 | 12.19 |
| AR7         | 54.73 | 2.85 | 13.81 |
| AR8         | 59.38 | 4.12 | 18.32 |
| AR9         | 60.91 | 4.42 | 17.87 |
| AR10        | 47.85 | 2.97 | 15.62 |
| AR11        | 51.89 | 3.85 | 16.32 |
| AR12        | 50.34 | 3.45 | 16.90 |
| AR13        | 48.28 | 3.34 | 17.41 |
| AR14        | 39.88 | 2.75 | 25.53 |
| AR15 (H4)   | 49.29 | 2.18 | 12.49 |
| AR17        | 43.54 | 2.50 | 14.63 |
| AR18        | 47.27 | 3.38 | 14.89 |

**INVESTIGATOR**

*M. Elasse*

**DIRECTOR**

*Al-Shehry*

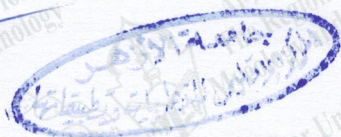

**Al-Azhar University Campus - Nasr City, Cairo, Egypt.**

**Tel: 0202 22620373**

**Fax : 0202 22620373**

**E.mail:rcmb@azhar.edu.eg**

**Website: <http://www.azhar.edu.eg.htm> \* [http://www.azhar.edu.eg/pages/fungi\\_center.htm](http://www.azhar.edu.eg/pages/fungi_center.htm)**

**Facebook : RCMB AZHAR**

**P.O. box mail : 11751 Nasr City Cairo, Egypt.**

# Al-Azhar University

## The Regional Center for Mycology and Biotechnology

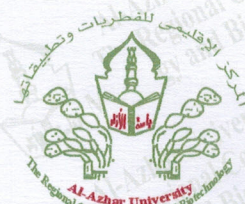

### Requester Data:

**Name:** Dr. Anas Ramadan Abdel-Sattar Qothb

**Authority:** Faculty of Pharmacy, Al-Azhar University

### Sample Data:

Thirteen samples had been submitted for elemental analysis.

### Analysis Report:

| Sample Code | C%    | H%   | N%    |
|-------------|-------|------|-------|
| H2-1        | 48.25 | 3.31 | 17.59 |
| H2-2        | 39.90 | 2.78 | 25.91 |
| H2-3        | 49.24 | 2.18 | 12.44 |
| M1          | 49.71 | 4.27 | 13.96 |
| M2          | 49.86 | 4.31 | 13.98 |
| M3          | 52.29 | 4.50 | 14.47 |
| M4          | 50.97 | 3.45 | 9.98  |
| M5          | 50.99 | 3.48 | 9.93  |
| M6          | 52.91 | 3.63 | 10.12 |
| M7          | 52.79 | 3.68 | 10.04 |
| Y1          | 54.60 | 4.41 | 10.28 |
| Y2          | 54.56 | 4.49 | 10.02 |
| Y3          | 56.78 | 4.62 | 10.68 |

**INVESTIGATOR**

*M. Elmass*

**DIRECTOR**

*H. Shukr*

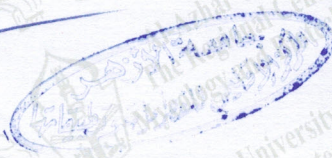

**Al-Azhar University Campus - Nasr City, Cairo, Egypt.**

**Tel: 0202 22620373**

**Fax : 0202 22620373**

**E.mail:rcmb@azhar.edu.eg**

**Website: <http://www.azhar.edu.eg.htm> \* [http://www.azhar.edu.eg/pages/fungi\\_center.htm](http://www.azhar.edu.eg/pages/fungi_center.htm)**

**Facebook : RCMB AZHAR**

**P.O. box mail : 11751 Nasr City Cairo, Egypt.**

# Toxicity report

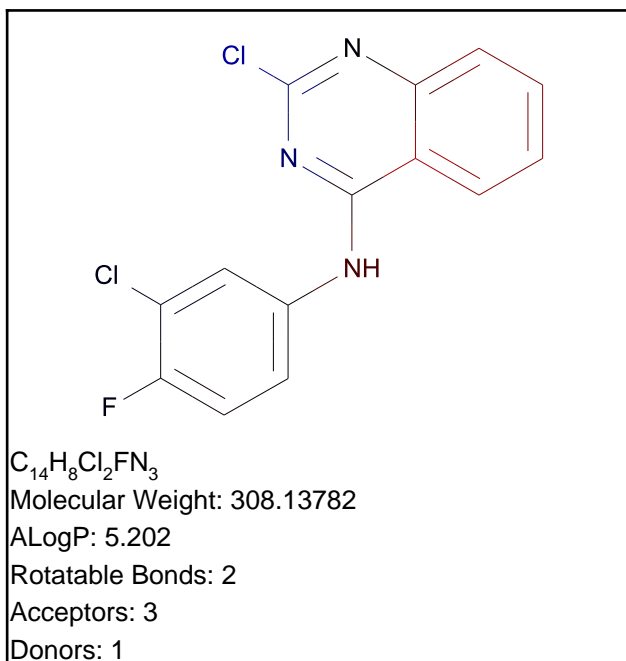

## Model Prediction

Prediction: Mutagen

Probability: 0.75

Enrichment: 1.34

Bayesian Score: 0.611

Mahalanobis Distance: 7.68

Mahalanobis Distance p-value: 0.998

Prediction: Positive if the Bayesian score is above the estimated best cutoff value from minimizing the false positive and false negative rate.

Probability: The estimated probability that the sample is in the positive category. This assumes that the Bayesian score follows a normal distribution and is different from the prediction using a cutoff.

Enrichment: An estimate of enrichment, that is, the increased likelihood (versus random) of this sample being in the category.

Bayesian Score: The standard Laplacian-modified Bayesian score.

Mahalanobis Distance: The Mahalanobis distance (MD) is the distance to the center of the training data. The larger the MD, the less trustworthy the prediction.

Mahalanobis Distance p-value: The p-value gives the fraction of training data with an MD greater than or equal to the one for the given sample, assuming normally distributed data. The smaller the p-value, the less trustworthy the prediction. For highly non-normal X properties (e.g., fingerprints), the MD p-value is wildly inaccurate.

## Structural Similar Compounds

| Name               | 61421-82-7                                                                          | 4947-27-7                                                                           | 61421-83-8                                                                          |
|--------------------|-------------------------------------------------------------------------------------|-------------------------------------------------------------------------------------|-------------------------------------------------------------------------------------|
| Structure          | 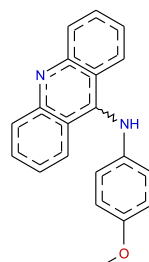 |  |  |
| Actual Endpoint    | Mutagen                                                                             | Mutagen                                                                             | Mutagen                                                                             |
| Predicted Endpoint | Mutagen                                                                             | Mutagen                                                                             | Mutagen                                                                             |
| Distance           | 0.472                                                                               | 0.501                                                                               | 0.527                                                                               |
| Reference          | Kazius et. al., J. Med. Chem. (2005) 48, 312-320                                    | Kazius et. al., J. Med. Chem. (2005) 48, 312-320                                    | Kazius et. al., J. Med. Chem. (2005) 48, 312-320                                    |

## Model Applicability

Unknown features are fingerprint features in the query molecule, but not found or appearing too infrequently in the training set.

1. All properties and OPS components are within expected ranges.

## Feature Contribution

### Top features for positive contribution

| Fingerprint | Bit/Smiles | Feature Structure                                                                                                                                     | Score | Mutagen in training set |
|-------------|------------|-------------------------------------------------------------------------------------------------------------------------------------------------------|-------|-------------------------|
| SCFP_12     | 1651620003 | 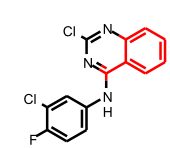<br><chem>[*][c](:[*]):[c]1:[cH]:[cH]:[cH]:[cH]:[c]:1:[*]</chem> | 0.377 | 575 out of 690          |

|                                        |             |                                                                                                                                                         |        |                         |
|----------------------------------------|-------------|---------------------------------------------------------------------------------------------------------------------------------------------------------|--------|-------------------------|
| SCFP_12                                | -1379673609 | 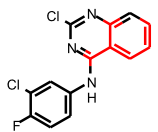<br><chem>[*][c](:[*]):[c]1:[cH]:[cH]:[cH]:[*]:[c]:1:[*]</chem>      | 0.375  | 934 out of 1123         |
| SCFP_12                                | 112346096   | <br><chem>[*][c](:[*]):[c](:[cH]):[*]:[c]:1:[*]</chem>               | 0.36   | 1035 out of 1263        |
| Top Features for negative contribution |             |                                                                                                                                                         |        |                         |
| Fingerprint                            | Bit/Smiles  | Feature Structure                                                                                                                                       | Score  | Mutagen in training set |
| SCFP_12                                | 60071962    | <br><chem>[*][c]1:[*]:[c](:[*]):n:[c](Cl):n:1</chem>                 | -1.82  | 0 out of 9              |
| SCFP_12                                | -1286592310 | <br><chem>[*]:n:[c](Cl):n:[*]</chem>                               | -0.887 | 2 out of 11             |
| SCFP_12                                | 1328855840  | <br><chem>[*]:[cH]:[c](N[c](:n:[*]):[c](:[*]):[*]):[cH]:[*]</chem> | -0.496 | 1 out of 4              |

**7a**

## TOPKAT Ames Mutagenicity

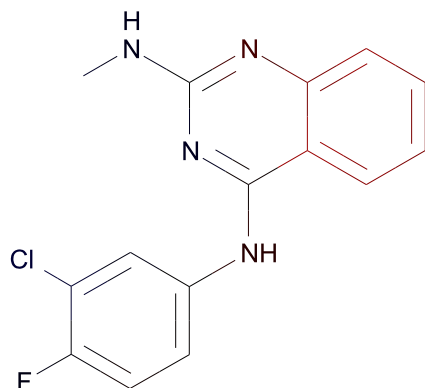
$$\text{C}_{15}\text{H}_{12}\text{ClFN}_4$$

Molecular Weight: 302.73398

|ALogP: 4.677

Rotatable Bonds: 3

Acceptors: 4

Donors: 2

## Model Prediction

**Prediction: Mutagen**

Probability: 0.781

Enrichment: 1.4

Bayesian Score: 2.66

Mahalanobis Distance: 10.2

Mahalanobis Distance p-value: 0.236

Prediction: Positive if the Bayesian score is above the estimated best cutoff value from minimizing the false positive and false negative rate.

**Probability:** The estimated probability that the sample is in the positive category. This assumes that the Bayesian score follows a normal distribution and is different from the prediction using a cutoff.

Enrichment: An estimate of enrichment, that is, the increased likelihood (versus random) of this sample being in the category.  
Bayesian Score: The standard Laplacian-modified Bayesian score.

**Mahalanobis Distance:** The Mahalanobis distance (MD) is the distance to the center of the training data. The larger the MD, the less trustworthy the prediction.

Mahalanobis Distance p-value: The p-value gives the fraction of training data with an MD greater than or equal to the one for the given sample, assuming normally distributed data. The smaller the p-value, the less trustworthy the prediction. For highly non-normal X properties (e.g., fingerprints), the MD p-value is wildly inaccurate.

## Structural Similar Compounds

| Name               | 106063-42-7                                                                         | 75776-00-0                                                                          | 61421-83-8                                                                          |
|--------------------|-------------------------------------------------------------------------------------|-------------------------------------------------------------------------------------|-------------------------------------------------------------------------------------|
| Structure          | 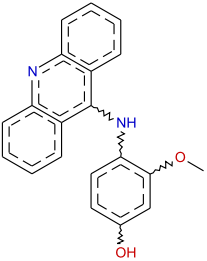 |  |  |
| Actual Endpoint    | Mutagen                                                                             | Mutagen                                                                             | Mutagen                                                                             |
| Predicted Endpoint | Mutagen                                                                             | Mutagen                                                                             | Mutagen                                                                             |
| Distance           | 0.433                                                                               | 0.477                                                                               | 0.493                                                                               |
| Reference          | Kazius et. al., J. Med. Chem. (2005) 48, 312-320                                    | Kazius et. al., J. Med. Chem. (2005) 48, 312-320                                    | Kazius et. al., J. Med. Chem. (2005) 48, 312-320                                    |

## Model Applicability

Unknown features are fingerprint features in the query molecule, but not found or appearing too infrequently in the training set.

1. All properties and OPS components are within expected ranges.

## Feature Contribution

## Top features for positive contribution

| Fingerprint | Bit/Smiles  | Feature Structure                                                                                                                                                                                                   | Score | Mutagen in training set |
|-------------|-------------|---------------------------------------------------------------------------------------------------------------------------------------------------------------------------------------------------------------------|-------|-------------------------|
| SCFP_12     | -1551584806 | 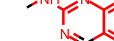<br><chem>[*]N[C@H]1nc2ccccc2n1C3=CC=C(C=C3)C(F)=CC=C3Cl</chem><br><chem>[*]N[C@H]1nc2ccccc2n1C3=CC=C(C=C3)C(F)=CC=C3Cl</chem> | 0.464 | 46 out of 50            |

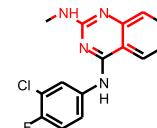[\*]N[C]1:n:[\*]:[c](:[\*]):[c](:[cH]:[\*]):n

|                                        |             |                                                                                                                                                        |        |                         |
|----------------------------------------|-------------|--------------------------------------------------------------------------------------------------------------------------------------------------------|--------|-------------------------|
| SCFP_12                                | 1651620003  | 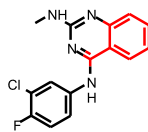<br><chem>[*][c](:[*]):[c]1:[cH]:[cH]:[cH]:[c]:1:[*]</chem>         | 0.377  | 575 out of 690          |
| SCFP_12                                | -1379673609 | <br><chem>[*][c](:[*]):[c]1:[cH]:[cH]:[cH]:[*]:[c]:1:[*]</chem>     | 0.375  | 934 out of 1123         |
| Top Features for negative contribution |             |                                                                                                                                                        |        |                         |
| Fingerprint                            | Bit/Smiles  | Feature Structure                                                                                                                                      | Score  | Mutagen in training set |
| SCFP_12                                | -760164567  | <br><chem>[*][c]1:[*]:[c](:[*]):n:[c](NC):n:1</chem>                | -1.35  | 0 out of 5              |
| SCFP_12                                | 1328855840  | <br><chem>[*]:[cH]:[c](N[c](:n:[*]):[c](:[*]):[*]):[cH]:[*]</chem> | -0.496 | 1 out of 4              |
| SCFP_12                                | -601571304  | <br><chem>[*][c](:[*]):[c](Cl):[cH]:[*]</chem>                    | -0.465 | 154 out of 430          |

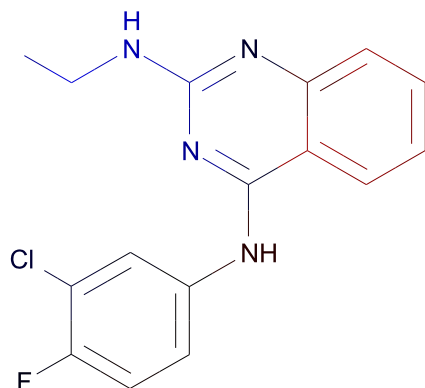

$C_{16}H_{14}ClFN_4$

Molecular Weight: 316.76056

ALogP: 5.025

Rotatable Bonds: 4

Acceptors: 4

Donors: 2

## Model Prediction

Prediction: Non-Mutagen

Probability: 0.717

Enrichment: 1.28

Bayesian Score: -1.04

Mahalanobis Distance: 9.34

Mahalanobis Distance p-value: 0.673

Prediction: Positive if the Bayesian score is above the estimated best cutoff value from minimizing the false positive and false negative rate.

Probability: The estimated probability that the sample is in the positive category. This assumes that the Bayesian score follows a normal distribution and is different from the prediction using a cutoff.

Enrichment: An estimate of enrichment, that is, the increased likelihood (versus random) of this sample being in the category.

Bayesian Score: The standard Laplacian-modified Bayesian score.

Mahalanobis Distance: The Mahalanobis distance (MD) is the distance to the center of the training data. The larger the MD, the less trustworthy the prediction.

Mahalanobis Distance p-value: The p-value gives the fraction of training data with an MD greater than or equal to the one for the given sample, assuming normally distributed data. The smaller the p-value, the less trustworthy the prediction. For highly non-normal X properties (e.g., fingerprints), the MD p-value is wildly inaccurate.

## Structural Similar Compounds

| Name               | 106063-42-7                                      | 75776-00-0                                       | DICLOFENAC  |
|--------------------|--------------------------------------------------|--------------------------------------------------|-------------|
| Structure          |                                                  |                                                  |             |
| Actual Endpoint    | Mutagen                                          | Mutagen                                          | Non-Mutagen |
| Predicted Endpoint | Mutagen                                          | Mutagen                                          | Non-Mutagen |
| Distance           | 0.482                                            | 0.505                                            | 0.543       |
| Reference          | Kazius et. al., J. Med. Chem. (2005) 48, 312-320 | Kazius et. al., J. Med. Chem. (2005) 48, 312-320 | PDR 1994    |

## Model Applicability

Unknown features are fingerprint features in the query molecule, but not found or appearing too infrequently in the training set.

1. All properties and OPS components are within expected ranges.

## Feature Contribution

### Top features for positive contribution

| Fingerprint | Bit/Smiles  | Feature Structure                                           | Score | Mutagen in training set |
|-------------|-------------|-------------------------------------------------------------|-------|-------------------------|
| SCFP_12     | -1551584806 | <br><chem>[*]N[c]1n:[*]:[c](:[*]):[c]([cH]):[*]):n:1</chem> | 0.464 | 46 out of 50            |

|                                        |             |                                                                                                                                                    |        |                         |
|----------------------------------------|-------------|----------------------------------------------------------------------------------------------------------------------------------------------------|--------|-------------------------|
| SCFP_12                                | 1651620003  | 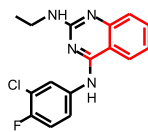<br><chem>[*][c](:[*]):[c]1:[cH]:[cH]:[cH]:[c]:1:[*]</chem>     | 0.377  | 575 out of 690          |
| SCFP_12                                | -1379673609 | <br><chem>[*][c](:[*]):[c]1:[cH]:[cH]:[cH]:[*]:[c]:1:[*]</chem> | 0.375  | 934 out of 1123         |
| Top Features for negative contribution |             |                                                                                                                                                    |        |                         |
| Fingerprint                            | Bit/Smiles  | Feature Structure                                                                                                                                  | Score  | Mutagen in training set |
| SCFP_12                                | -760164567  | <br><chem>[*][c]1:[*]:[c](:[*]):n:[c](NC):n:1</chem>            | -1.35  | 0 out of 5              |
| SCFP_12                                | -150051645  | <br><chem>[*]:n:[c](NCC):n:[*]</chem>                          | -0.998 | 0 out of 3              |
| SCFP_12                                | -1301088181 | <br><chem>[*][c]1:[*]:[c](:[*]):n:[c](NCC):n:1</chem>         | -0.998 | 0 out of 3              |

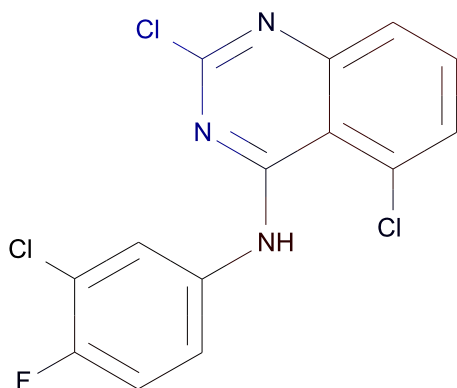

$C_{14}H_7Cl_3FN_3$

Molecular Weight: 342.58288

ALogP: 5.867

Rotatable Bonds: 2

Acceptors: 3

Donors: 1

## Model Prediction

Prediction: Non-Mutagen

Probability: 0.693

Enrichment: 1.24

Bayesian Score: -2.02

Mahalanobis Distance: 7.76

Mahalanobis Distance p-value: 0.997

Prediction: Positive if the Bayesian score is above the estimated best cutoff value from minimizing the false positive and false negative rate.

Probability: The estimated probability that the sample is in the positive category. This assumes that the Bayesian score follows a normal distribution and is different from the prediction using a cutoff.

Enrichment: An estimate of enrichment, that is, the increased likelihood (versus random) of this sample being in the category.

Bayesian Score: The standard Laplacian-modified Bayesian score.

Mahalanobis Distance: The Mahalanobis distance (MD) is the distance to the center of the training data. The larger the MD, the less trustworthy the prediction.

Mahalanobis Distance p-value: The p-value gives the fraction of training data with an MD greater than or equal to the one for the given sample, assuming normally distributed data. The smaller the p-value, the less trustworthy the prediction. For highly non-normal X properties (e.g., fingerprints), the MD p-value is wildly inaccurate.

## Structural Similar Compounds

| Name               | 61421-82-7                                       | 21232-47-3                                       | 4947-27-7                                        |
|--------------------|--------------------------------------------------|--------------------------------------------------|--------------------------------------------------|
| Structure          |                                                  |                                                  |                                                  |
| Actual Endpoint    | Mutagen                                          | Non-Mutagen                                      | Mutagen                                          |
| Predicted Endpoint | Mutagen                                          | Non-Mutagen                                      | Mutagen                                          |
| Distance           | 0.545                                            | 0.547                                            | 0.570                                            |
| Reference          | Kazius et. al., J. Med. Chem. (2005) 48, 312-320 | Kazius et. al., J. Med. Chem. (2005) 48, 312-320 | Kazius et. al., J. Med. Chem. (2005) 48, 312-320 |

## Model Applicability

Unknown features are fingerprint features in the query molecule, but not found or appearing too infrequently in the training set.

1. All properties and OPS components are within expected ranges.

## Feature Contribution

### Top features for positive contribution

| Fingerprint | Bit/Smiles | Feature Structure                                           | Score | Mutagen in training set |
|-------------|------------|-------------------------------------------------------------|-------|-------------------------|
| SCFP_12     | 112346096  | <br><chem>[*][c](:[*]):[c](:[cH] :[*]):[c](:[*]):[*]</chem> | 0.36  | 1035 out of 1263        |

| SCFP_12                                | -1381862798 | 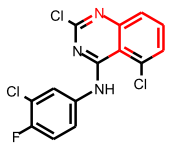<br>[*]:n:[c]1:[cH]:[cH]:[cH]:[*]:[c]:1:[*]                 | 0.314  | 339 out of 433          |
|----------------------------------------|-------------|------------------------------------------------------------------------------------------------------------------------------------------------|--------|-------------------------|
| SCFP_12                                | 403834996   | <br>[*][c]1:[*]:[c]([*]):[c]2:[cH]:[cH]:[cH]:[cH]:[c]:2:n:1 | 0.314  | 138 out of 176          |
| Top Features for negative contribution |             |                                                                                                                                                |        |                         |
| Fingerprint                            | Bit/Smiles  | Feature Structure                                                                                                                              | Score  | Mutagen in training set |
| SCFP_12                                | 60071962    | <br>[*][c]1:[*]:[c]([*]):n:[c](Cl):n:1                      | -1.82  | 0 out of 9              |
| SCFP_12                                | -1286592310 | <br>[*]:n:[c](Cl):n:[*]                                    | -0.887 | 2 out of 11             |
| SCFP_12                                | 1328855840  | <br>[*]:[cH]:[c](N[c](:n:[*]):[c]([*]):[*])):[cH]:[*]     | -0.496 | 1 out of 4              |

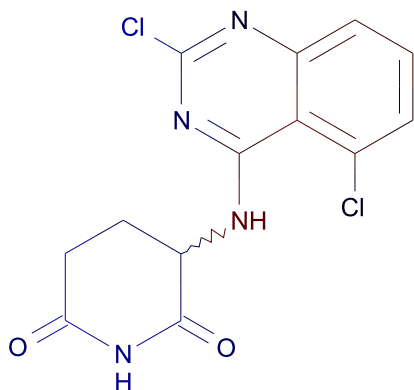
 $C_{13}H_{10}Cl_2N_4O_2$ 

Molecular Weight: 325.15009

ALogP: 2.49

Rotatable Bonds: 2

Acceptors: 5

Donors: 2

## Model Prediction

Prediction: Non-Mutagen

Probability: 0.637

Enrichment: 1.14

Bayesian Score: -3.96

Mahalanobis Distance: 8.67

Mahalanobis Distance p-value: 0.923

Prediction: Positive if the Bayesian score is above the estimated best cutoff value from minimizing the false positive and false negative rate.

Probability: The estimated probability that the sample is in the positive category. This assumes that the Bayesian score follows a normal distribution and is different from the prediction using a cutoff.

Enrichment: An estimate of enrichment, that is, the increased likelihood (versus random) of this sample being in the category.

Bayesian Score: The standard Laplacian-modified Bayesian score.

Mahalanobis Distance: The Mahalanobis distance (MD) is the distance to the center of the training data. The larger the MD, the less trustworthy the prediction.

Mahalanobis Distance p-value: The p-value gives the fraction of training data with an MD greater than or equal to the one for the given sample, assuming normally distributed data. The smaller the p-value, the less trustworthy the prediction. For highly non-normal X properties (e.g., fingerprints), the MD p-value is wildly inaccurate.

## Structural Similar Compounds

| Name               | 97919-22-7                                       | 491-80-5                                         | 2-ETHOXYMETHYL-1;3-DIHYDROXYANTHRAQUINONE |
|--------------------|--------------------------------------------------|--------------------------------------------------|-------------------------------------------|
| Structure          |                                                  |                                                  |                                           |
| Actual Endpoint    | Non-Mutagen                                      | Non-Mutagen                                      | Mutagen                                   |
| Predicted Endpoint | Non-Mutagen                                      | Non-Mutagen                                      | Mutagen                                   |
| Distance           | 0.527                                            | 0.534                                            | 0.534                                     |
| Reference          | Kazius et. al., J. Med. Chem. (2005) 48, 312-320 | Kazius et. al., J. Med. Chem. (2005) 48, 312-320 | EMIC                                      |

## Model Applicability

Unknown features are fingerprint features in the query molecule, but not found or appearing too infrequently in the training set.

1. All properties and OPS components are within expected ranges.

## Feature Contribution

| Top features for positive contribution |             |                                                                      |       |                         |
|----------------------------------------|-------------|----------------------------------------------------------------------|-------|-------------------------|
| Fingerprint                            | Bit/Smiles  | Feature Structure                                                    | Score | Mutagen in training set |
| SCFP_12                                | -1231050790 | <br>[*]C([*])N[c]1:n:[c]([*]):[*]:[*]:[c]([*]):[*]:[c]1:[c]([*]):[*] | 0.388 | 3 out of 3              |

|                                        |             |                                                                                                                                                 |        |                         |
|----------------------------------------|-------------|-------------------------------------------------------------------------------------------------------------------------------------------------|--------|-------------------------|
| SCFP_12                                | 112346096   | 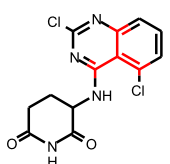<br><chem>[*][c](:[*]):[c](:[cH] ):[*]):[c](:[*]):[*]</chem> | 0.36   | 1035 out of 1263        |
| SCFP_12                                | -1817806383 | <br><chem>[*]CC(N[*])C(=[*])[*]</chem>                       | 0.337  | 2 out of 2              |
| Top Features for negative contribution |             |                                                                                                                                                 |        |                         |
| Fingerprint                            | Bit/Smiles  | Feature Structure                                                                                                                               | Score  | Mutagen in training set |
| SCFP_12                                | 60071962    | <br><chem>[*][c]1:[*]:[c](:[*]) :n:[c](Cl):n:1</chem>        | -1.82  | 0 out of 9              |
| SCFP_12                                | 395945879   | <br><chem>[*]C1[*]CC(=O)NC1=O</chem>                        | -1.19  | 0 out of 4              |
| SCFP_12                                | -1286592310 | <br><chem>[*]:n:[c](Cl):n:[*]</chem>                       | -0.887 | 2 out of 11             |

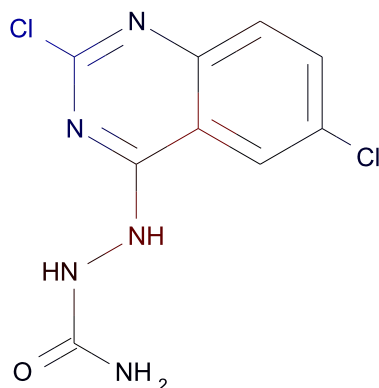

$C_9H_7Cl_2N_5O$

Molecular Weight: 272.09078

ALogP: 2.379

Rotatable Bonds: 2

Acceptors: 4

Donors: 3

## Model Prediction

Prediction: Non-Mutagen

Probability: 0.717

Enrichment: 1.28

Bayesian Score: -1.04

Mahalanobis Distance: 10.9

Mahalanobis Distance p-value: 0.0482

Prediction: Positive if the Bayesian score is above the estimated best cutoff value from minimizing the false positive and false negative rate.

Probability: The estimated probability that the sample is in the positive category. This assumes that the Bayesian score follows a normal distribution and is different from the prediction using a cutoff.

Enrichment: An estimate of enrichment, that is, the increased likelihood (versus random) of this sample being in the category.

Bayesian Score: The standard Laplacian-modified Bayesian score.

Mahalanobis Distance: The Mahalanobis distance (MD) is the distance to the center of the training data. The larger the MD, the less trustworthy the prediction.

Mahalanobis Distance p-value: The p-value gives the fraction of training data with an MD greater than or equal to the one for the given sample, assuming normally distributed data. The smaller the p-value, the less trustworthy the prediction. For highly non-normal X properties (e.g., fingerprints), the MD p-value is wildly inaccurate.

## Structural Similar Compounds

| Name               | 6027-98-1                                        | Picloram                    | 520-36-5                                         |
|--------------------|--------------------------------------------------|-----------------------------|--------------------------------------------------|
| Structure          |                                                  |                             |                                                  |
| Actual Endpoint    | Non-Mutagen                                      | Non-Mutagen                 | Non-Mutagen                                      |
| Predicted Endpoint | Non-Mutagen                                      | Non-Mutagen                 | Non-Mutagen                                      |
| Distance           | 0.560                                            | 0.561                       | 0.564                                            |
| Reference          | Kazius et. al., J. Med. Chem. (2005) 48, 312-320 | Mut. Res. 204: 17-115; 1988 | Kazius et. al., J. Med. Chem. (2005) 48, 312-320 |

## Model Applicability

Unknown features are fingerprint features in the query molecule, but not found or appearing too infrequently in the training set.

1. All properties and OPS components are within expected ranges.

## Feature Contribution

### Top features for positive contribution

| Fingerprint | Bit/Smiles  | Feature Structure              | Score | Mutagen in training set |
|-------------|-------------|--------------------------------|-------|-------------------------|
| SCFP_12     | -1977951815 | <br><chem>[*]NNC(=O)[*]</chem> | 0.362 | 7 out of 8              |

|                                        |             |                                                                                                                                             |        |                         |
|----------------------------------------|-------------|---------------------------------------------------------------------------------------------------------------------------------------------|--------|-------------------------|
| SCFP_12                                | 112346096   | <br><chem>*[c](:[*]):[c](:[cH]):[*])[c](:[*]):[*]</chem> | 0.36   | 1035 out of 1263        |
| SCFP_12                                | -1381862798 | <br><chem>*]:n:[c]1:[cH]:[cH]:[cH]:[*]:[c]:1:[*]</chem>  | 0.314  | 339 out of 433          |
| Top Features for negative contribution |             |                                                                                                                                             |        |                         |
| Fingerprint                            | Bit/Smiles  | Feature Structure                                                                                                                           | Score  | Mutagen in training set |
| SCFP_12                                | 60071962    | <br><chem>*[c]1:[*]:[c](:[*]):n:[c](Cl):n:1</chem>       | -1.82  | 0 out of 9              |
| SCFP_12                                | -1286592310 | <br><chem>*]:n:[c](Cl):n:[*]</chem>                     | -0.887 | 2 out of 11             |
| SCFP_12                                | -116109291  | <br><chem>*]:[c]1:[*]:[cH]:[cH]:[c](Cl):[cH]:1</chem>  | -0.502 | 76 out of 221           |

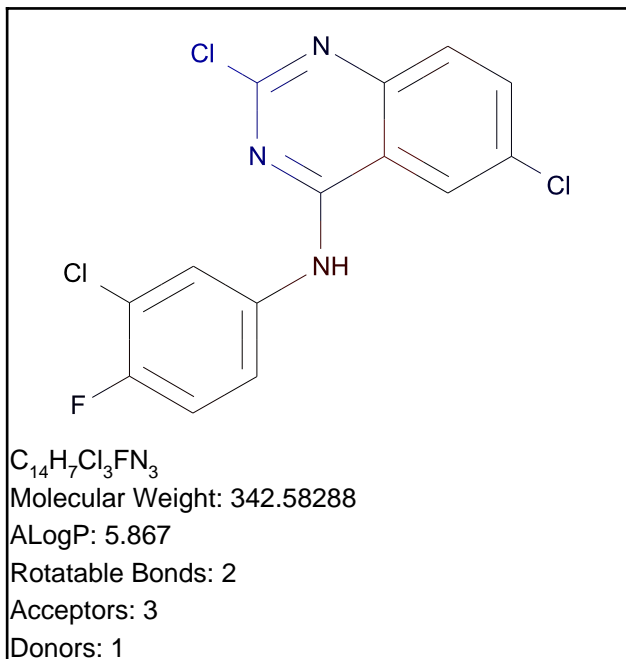

### Model Prediction

Prediction: Non-Mutagen

Probability: 0.677

Enrichment: 1.21

Bayesian Score: -2.64

Mahalanobis Distance: 7.76

Mahalanobis Distance p-value: 0.997

Prediction: Positive if the Bayesian score is above the estimated best cutoff value from minimizing the false positive and false negative rate.

Probability: The estimated probability that the sample is in the positive category. This assumes that the Bayesian score follows a normal distribution and is different from the prediction using a cutoff.

Enrichment: An estimate of enrichment, that is, the increased likelihood (versus random) of this sample being in the category.

Bayesian Score: The standard Laplacian-modified Bayesian score.

Mahalanobis Distance: The Mahalanobis distance (MD) is the distance to the center of the training data. The larger the MD, the less trustworthy the prediction.

Mahalanobis Distance p-value: The p-value gives the fraction of training data with an MD greater than or equal to the one for the given sample, assuming normally distributed data. The smaller the p-value, the less trustworthy the prediction. For highly non-normal X properties (e.g., fingerprints), the MD p-value is wildly inaccurate.

### Structural Similar Compounds

| Name               | 21232-47-3                                                                          | 61421-82-7                                                                          | 4947-27-7                                                                           |
|--------------------|-------------------------------------------------------------------------------------|-------------------------------------------------------------------------------------|-------------------------------------------------------------------------------------|
| Structure          | 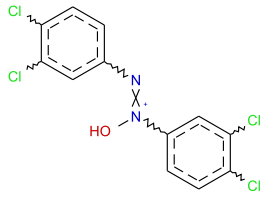 |  |  |
| Actual Endpoint    | Non-Mutagen                                                                         | Mutagen                                                                             | Mutagen                                                                             |
| Predicted Endpoint | Non-Mutagen                                                                         | Mutagen                                                                             | Mutagen                                                                             |
| Distance           | 0.548                                                                               | 0.557                                                                               | 0.575                                                                               |
| Reference          | Kazius et. al., J. Med. Chem. (2005) 48, 312-320                                    | Kazius et. al., J. Med. Chem. (2005) 48, 312-320                                    | Kazius et. al., J. Med. Chem. (2005) 48, 312-320                                    |

### Model Applicability

Unknown features are fingerprint features in the query molecule, but not found or appearing too infrequently in the training set.

1. All properties and OPS components are within expected ranges.

### Feature Contribution

#### Top features for positive contribution

| Fingerprint | Bit/Smiles | Feature Structure                                                                                                                                | Score | Mutagen in training set |
|-------------|------------|--------------------------------------------------------------------------------------------------------------------------------------------------|-------|-------------------------|
| SCFP_12     | 112346096  | 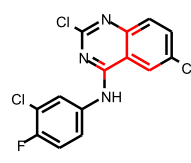<br><chem>[*][c](:[*]):[c](:[cH] :[*]):[c](:[*]):[*]</chem> | 0.36  | 1035 out of 1263        |

|                                        |             |                                                                                                                                                   |        |                         |
|----------------------------------------|-------------|---------------------------------------------------------------------------------------------------------------------------------------------------|--------|-------------------------|
| SCFP_12                                | -1381862798 | 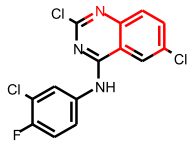<br><chem>[*]:n:[c]1:[cH]:[cH]:[cH]:[cH]:[cH]:[c]:1:[*]</chem> | 0.314  | 339 out of 433          |
| SCFP_12                                | 10          | <br><chem>[*]N[*]</chem>                                       | 0.306  | 1774 out of 2287        |
| Top Features for negative contribution |             |                                                                                                                                                   |        |                         |
| Fingerprint                            | Bit/Smiles  | Feature Structure                                                                                                                                 | Score  | Mutagen in training set |
| SCFP_12                                | 60071962    | <br><chem>[*][c]1:[*]:[c](:[*]) :n:[c](Cl):n:1</chem>          | -1.82  | 0 out of 9              |
| SCFP_12                                | -1286592310 | <br><chem>[*]:n:[c](Cl):n:[*]</chem>                          | -0.887 | 2 out of 11             |
| SCFP_12                                | -116109291  | <br><chem>[*]:[c]1:[*]:[cH]:[cH ]:[c](Cl):[cH]:1</chem>      | -0.502 | 76 out of 221           |

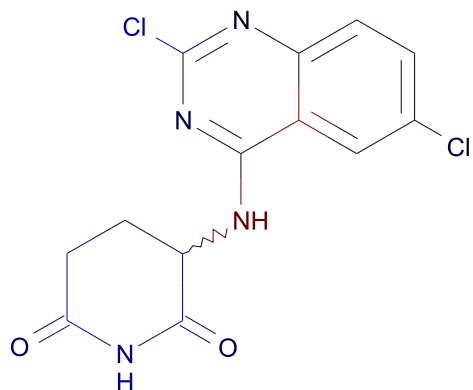
 $C_{13}H_{10}Cl_2N_4O_2$ 

Molecular Weight: 325.15009

ALogP: 2.49

Rotatable Bonds: 2

Acceptors: 5

Donors: 2

## Model Prediction

Prediction: Non-Mutagen

Probability: 0.616

Enrichment: 1.1

Bayesian Score: -4.58

Mahalanobis Distance: 8.67

Mahalanobis Distance p-value: 0.923

Prediction: Positive if the Bayesian score is above the estimated best cutoff value from minimizing the false positive and false negative rate.

Probability: The estimated probability that the sample is in the positive category. This assumes that the Bayesian score follows a normal distribution and is different from the prediction using a cutoff.

Enrichment: An estimate of enrichment, that is, the increased likelihood (versus random) of this sample being in the category.

Bayesian Score: The standard Laplacian-modified Bayesian score.

Mahalanobis Distance: The Mahalanobis distance (MD) is the distance to the center of the training data. The larger the MD, the less trustworthy the prediction.

Mahalanobis Distance p-value: The p-value gives the fraction of training data with an MD greater than or equal to the one for the given sample, assuming normally distributed data. The smaller the p-value, the less trustworthy the prediction. For highly non-normal X properties (e.g., fingerprints), the MD p-value is wildly inaccurate.

## Structural Similar Compounds

| Name               | 491-80-5                                         | 97919-22-7                                       | 2-ETHOXYMETHYL-1,3-DIHYDROXYANTHRAQUINONE |
|--------------------|--------------------------------------------------|--------------------------------------------------|-------------------------------------------|
| Structure          |                                                  |                                                  |                                           |
| Actual Endpoint    | Non-Mutagen                                      | Non-Mutagen                                      | Mutagen                                   |
| Predicted Endpoint | Non-Mutagen                                      | Non-Mutagen                                      | Mutagen                                   |
| Distance           | 0.534                                            | 0.537                                            | 0.539                                     |
| Reference          | Kazius et. al., J. Med. Chem. (2005) 48, 312-320 | Kazius et. al., J. Med. Chem. (2005) 48, 312-320 | EMIC                                      |

## Model Applicability

Unknown features are fingerprint features in the query molecule, but not found or appearing too infrequently in the training set.

1. All properties and OPS components are within expected ranges.

## Feature Contribution

| Top features for positive contribution |             |                                                                       |       |                         |
|----------------------------------------|-------------|-----------------------------------------------------------------------|-------|-------------------------|
| Fingerprint                            | Bit/Smiles  | Feature Structure                                                     | Score | Mutagen in training set |
| SCFP_12                                | -1231050790 | <br>[*]C([*])N[c]1:n:[c]([*]):[*]):[*]:[c]([*]):[*]:[c]1:[c]([*]):[*] | 0.388 | 3 out of 3              |

|                                        |             |                                                                                                                                             |        |                         |
|----------------------------------------|-------------|---------------------------------------------------------------------------------------------------------------------------------------------|--------|-------------------------|
| SCFP_12                                | 112346096   | 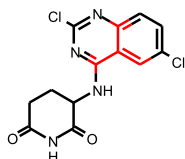<br><chem>[*][c]([*]):[c](:[cH]:[*]):[c]([*]):[*]</chem> | 0.36   | 1035 out of 1263        |
| SCFP_12                                | -1817806383 | <br><chem>[*]CC(N[*])C(=[*])[*]</chem>                   | 0.337  | 2 out of 2              |
| Top Features for negative contribution |             |                                                                                                                                             |        |                         |
| Fingerprint                            | Bit/Smiles  | Feature Structure                                                                                                                           | Score  | Mutagen in training set |
| SCFP_12                                | 60071962    | <br><chem>[*][c]1:[*]:[c]([*]):n:[c](Cl):n:1</chem>      | -1.82  | 0 out of 9              |
| SCFP_12                                | 395945879   | <br><chem>[*]C1[*]CC(=O)NC1=O</chem>                    | -1.19  | 0 out of 4              |
| SCFP_12                                | -1286592310 | <br><chem>[*]:n:[c](Cl):n:[*]</chem>                   | -0.887 | 2 out of 11             |

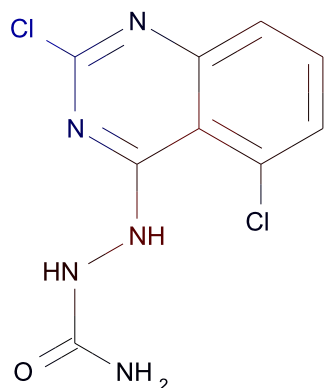

$C_9H_7Cl_2N_5O$

Molecular Weight: 272.09077

ALogP: 2.379

Rotatable Bonds: 2

Acceptors: 4

Donors: 3

## Model Prediction

Prediction: Mutagen

Probability: 0.731

Enrichment: 1.31

Bayesian Score: -0.416

Mahalanobis Distance: 10.9

Mahalanobis Distance p-value: 0.0482

Prediction: Positive if the Bayesian score is above the estimated best cutoff value from minimizing the false positive and false negative rate.

Probability: The estimated probability that the sample is in the positive category. This assumes that the Bayesian score follows a normal distribution and is different from the prediction using a cutoff.

Enrichment: An estimate of enrichment, that is, the increased likelihood (versus random) of this sample being in the category.

Bayesian Score: The standard Laplacian-modified Bayesian score.

Mahalanobis Distance: The Mahalanobis distance (MD) is the distance to the center of the training data. The larger the MD, the less trustworthy the prediction.

Mahalanobis Distance p-value: The p-value gives the fraction of training data with an MD greater than or equal to the one for the given sample, assuming normally distributed data. The smaller the p-value, the less trustworthy the prediction. For highly non-normal X properties (e.g., fingerprints), the MD p-value is wildly inaccurate.

## Structural Similar Compounds

| Name               | 2-Benzyliden-1-(3-aminoindol)-2-carbohydrazide | 6027-98-1                                        | Picloram                    |
|--------------------|------------------------------------------------|--------------------------------------------------|-----------------------------|
| Structure          |                                                |                                                  |                             |
| Actual Endpoint    | Non-Mutagen                                    | Non-Mutagen                                      | Non-Mutagen                 |
| Predicted Endpoint | Non-Mutagen                                    | Non-Mutagen                                      | Non-Mutagen                 |
| Distance           | 0.554                                          | 0.559                                            | 0.561                       |
| Reference          | Mutagenesis 7(1):37-39; 1992                   | Kazius et. al., J. Med. Chem. (2005) 48, 312-320 | Mut. Res. 204: 17-115; 1988 |

## Model Applicability

Unknown features are fingerprint features in the query molecule, but not found or appearing too infrequently in the training set.

1. All properties and OPS components are within expected ranges.

## Feature Contribution

| Top features for positive contribution |             |                              |       |                         |
|----------------------------------------|-------------|------------------------------|-------|-------------------------|
| Fingerprint                            | Bit/Smiles  | Feature Structure            | Score | Mutagen in training set |
| SCFP_12                                | -1977951815 | <br><chem>[*]NNC(=O)N</chem> | 0.362 | 7 out of 8              |

|                                        |             |                                                                                                                                                 |        |                         |
|----------------------------------------|-------------|-------------------------------------------------------------------------------------------------------------------------------------------------|--------|-------------------------|
| SCFP_12                                | 112346096   | 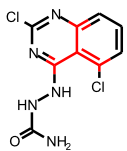<br><chem>[*][c](:[*]):[c](:[cH] ):[*]):[c](:[*]):[*]</chem> | 0.36   | 1035 out of 1263        |
| SCFP_12                                | -1381862798 | <br><chem>[*]:n:[c]1:[cH]:[cH]: [cH]:[*]:[c]:1:[*]</chem>    | 0.314  | 339 out of 433          |
| Top Features for negative contribution |             |                                                                                                                                                 |        |                         |
| Fingerprint                            | Bit/Smiles  | Feature Structure                                                                                                                               | Score  | Mutagen in training set |
| SCFP_12                                | 60071962    | <br><chem>[*][c]1:[*]:[c](:[*]) :n:[c](Cl):n:1</chem>        | -1.82  | 0 out of 9              |
| SCFP_12                                | -1286592310 | <br><chem>[*]:n:[c](Cl):n:[*]</chem>                        | -0.887 | 2 out of 11             |
| SCFP_12                                | -1378360678 | <br><chem>[*]:[c]1:[*]:[cH]:[cH] :[cH]:[c]:1Cl</chem>      | -0.474 | 101 out of 285          |

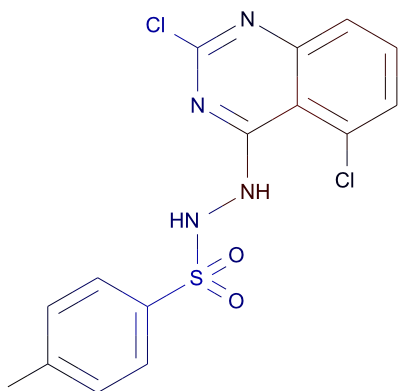

$C_{15}H_{12}Cl_2N_4O_2S$

Molecular Weight: 383.25237

ALogP: 4.443

Rotatable Bonds: 4

Acceptors: 5

Donors: 2

## Model Prediction

Prediction: Non-Mutagen

Probability: 0.623

Enrichment: 1.12

Bayesian Score: -4.38

Mahalanobis Distance: 9.26

Mahalanobis Distance p-value: 0.715

Prediction: Positive if the Bayesian score is above the estimated best cutoff value from minimizing the false positive and false negative rate.

Probability: The estimated probability that the sample is in the positive category. This assumes that the Bayesian score follows a normal distribution and is different from the prediction using a cutoff.

Enrichment: An estimate of enrichment, that is, the increased likelihood (versus random) of this sample being in the category.

Bayesian Score: The standard Laplacian-modified Bayesian score.

Mahalanobis Distance: The Mahalanobis distance (MD) is the distance to the center of the training data. The larger the MD, the less trustworthy the prediction.

Mahalanobis Distance p-value: The p-value gives the fraction of training data with an MD greater than or equal to the one for the given sample, assuming normally distributed data. The smaller the p-value, the less trustworthy the prediction. For highly non-normal X properties (e.g., fingerprints), the MD p-value is wildly inaccurate.

## Structural Similar Compounds

| Name               | N/A                         | N/A                         | 110021-94-8                                      |
|--------------------|-----------------------------|-----------------------------|--------------------------------------------------|
| Structure          |                             |                             |                                                  |
| Actual Endpoint    | Mutagen                     | Mutagen                     | Mutagen                                          |
| Predicted Endpoint | Mutagen                     | Mutagen                     | Mutagen                                          |
| Distance           | 0.531                       | 0.538                       | 0.562                                            |
| Reference          | Mut. Res. 280:233-244; 1992 | Mut. Res. 280:233-244; 1992 | Kazius et. al., J. Med. Chem. (2005) 48, 312-320 |

## Model Applicability

Unknown features are fingerprint features in the query molecule, but not found or appearing too infrequently in the training set.

1. All properties and OPS components are within expected ranges.

## Feature Contribution

### Top features for positive contribution

| Fingerprint | Bit/Smiles | Feature Structure                                                | Score | Mutagen in training set |
|-------------|------------|------------------------------------------------------------------|-------|-------------------------|
| SCFP_12     | 112346096  | <br><chem>[*][c]([*]):[c](:[cH]       ]:[*]):[c]([*]):[*]</chem> | 0.36  | 1035 out of 1263        |

|                                        |             |                                                                                                                                                       |       |                         |
|----------------------------------------|-------------|-------------------------------------------------------------------------------------------------------------------------------------------------------|-------|-------------------------|
| SCFP_12                                | 2054891299  | 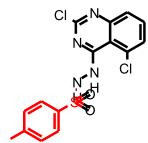<br><chem>[*]S(=[*])(=[*])[c]1:[cH]:[cH]:[c](C):[cH]:[cH]:1</chem> | 0.322 | 13 out of 16            |
| SCFP_12                                | -1381862798 | <br><chem>[*]:n:[c]1:[cH]:[cH]:[cH]:[cH]:[*]:[c]:1:[*]</chem>      | 0.314 | 339 out of 433          |
| Top Features for negative contribution |             |                                                                                                                                                       |       |                         |
| Fingerprint                            | Bit/Smiles  | Feature Structure                                                                                                                                     | Score | Mutagen in training set |
| SCFP_12                                | 60071962    | <br><chem>[*][c]1:[*]:[c](:[*]):n:[c](Cl):n:1</chem>               | -1.82 | 0 out of 9              |
| SCFP_12                                | 182991870   | <br><chem>[*]NS(=O)(=O)[c](:[*]):[*]</chem>                       | -1.15 | 8 out of 48             |
| SCFP_12                                | -1247518081 | <br><chem>[*]NS(=O)(=O)[c]1:[cH]:[cH]:[*]:[cH]:[cH]:1</chem>     | -1.01 | 6 out of 32             |

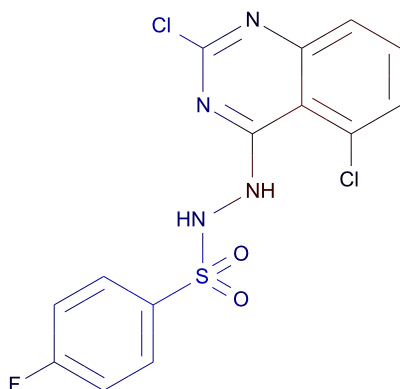

$C_{14}H_9Cl_2FN_4O_2S$

Molecular Weight: 387.21626

ALogP: 4.162

Rotatable Bonds: 4

Acceptors: 5

Donors: 2

## Model Prediction

Prediction: Non-Mutagen

Probability: 0.577

Enrichment: 1.03

Bayesian Score: -5.64

Mahalanobis Distance: 10.9

Mahalanobis Distance p-value: 0.0424

Prediction: Positive if the Bayesian score is above the estimated best cutoff value from minimizing the false positive and false negative rate.

Probability: The estimated probability that the sample is in the positive category. This assumes that the Bayesian score follows a normal distribution and is different from the prediction using a cutoff.

Enrichment: An estimate of enrichment, that is, the increased likelihood (versus random) of this sample being in the category.

Bayesian Score: The standard Laplacian-modified Bayesian score.

Mahalanobis Distance: The Mahalanobis distance (MD) is the distance to the center of the training data. The larger the MD, the less trustworthy the prediction.

Mahalanobis Distance p-value: The p-value gives the fraction of training data with an MD greater than or equal to the one for the given sample, assuming normally distributed data. The smaller the p-value, the less trustworthy the prediction. For highly non-normal X properties (e.g., fingerprints), the MD p-value is wildly inaccurate.

## Structural Similar Compounds

| Name               | N/A                         | N/A                         | 3-(4'-Acetylamino-2-chlorobenzylideneamino)-5H-1,2,3-triazin-4-one |
|--------------------|-----------------------------|-----------------------------|--------------------------------------------------------------------|
| Structure          |                             |                             |                                                                    |
| Actual Endpoint    | Mutagen                     | Mutagen                     | Mutagen                                                            |
| Predicted Endpoint | Mutagen                     | Mutagen                     | Mutagen                                                            |
| Distance           | 0.526                       | 0.538                       | 0.557                                                              |
| Reference          | Mut. Res. 280:233-244; 1992 | Mut. Res. 280:233-244; 1992 | Mutagenesis 7(1):37-39; 1992                                       |

## Model Applicability

Unknown features are fingerprint features in the query molecule, but not found or appearing too infrequently in the training set.

1. All properties and OPS components are within expected ranges.

## Feature Contribution

### Top features for positive contribution

| Fingerprint | Bit/Smiles | Feature Structure                             | Score | Mutagen in training set |
|-------------|------------|-----------------------------------------------|-------|-------------------------|
| SCFP_12     | 112346096  | <br>[*][c](:[*]):[c](:[cH]:[*]):[c](:[*]):[*] | 0.36  | 1035 out of 1263        |

|                                        |             |                                                                                                                                                     |       |                         |
|----------------------------------------|-------------|-----------------------------------------------------------------------------------------------------------------------------------------------------|-------|-------------------------|
| SCFP_12                                | -1381862798 | 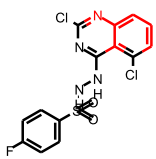<br>[*]:n:[c]1:[cH]:[cH]:[cH]:[cH]:[*]:[c]:1:[*]                 | 0.314 | 339 out of 433          |
| SCFP_12                                | 403834996   | <br>[*][c]1:[*]:[c]([*]):[c]2:[cH]:[cH]:[cH]:[cH]:[cH]:[c]:2:n:1 | 0.314 | 138 out of 176          |
| Top Features for negative contribution |             |                                                                                                                                                     |       |                         |
| Fingerprint                            | Bit/Smiles  | Feature Structure                                                                                                                                   | Score | Mutagen in training set |
| SCFP_12                                | 60071962    | <br>[*][c]1:[*]:[c]([*]):n:[c](Cl):n:1                           | -1.82 | 0 out of 9              |
| SCFP_12                                | 182991870   | <br>[*]NS(=O)(=O)[c]([*]):[*]                                   | -1.15 | 8 out of 48             |
| SCFP_12                                | -1247518081 | <br>[*]NS(=O)(=O)[c]1:[cH]:[cH]:[*]:[cH]:[cH]:1                | -1.01 | 6 out of 32             |

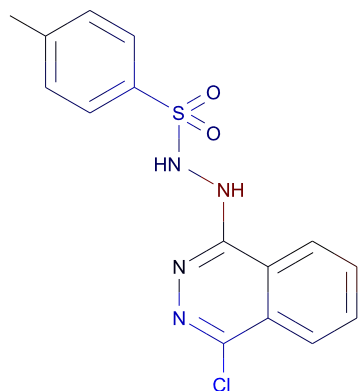

$C_{15}H_{13}ClN_4O_2S$

Molecular Weight: 348.80731

ALogP: 3.529

Rotatable Bonds: 4

Acceptors: 5

Donors: 2

## Model Prediction

Prediction: Non-Mutagen

Probability: 0.61

Enrichment: 1.09

Bayesian Score: -4.74

Mahalanobis Distance: 9.19

Mahalanobis Distance p-value: 0.749

Prediction: Positive if the Bayesian score is above the estimated best cutoff value from minimizing the false positive and false negative rate.

Probability: The estimated probability that the sample is in the positive category. This assumes that the Bayesian score follows a normal distribution and is different from the prediction using a cutoff.

Enrichment: An estimate of enrichment, that is, the increased likelihood (versus random) of this sample being in the category. Bayesian Score: The standard Laplacian-modified Bayesian score.

Mahalanobis Distance: The Mahalanobis distance (MD) is the distance to the center of the training data. The larger the MD, the less trustworthy the prediction.

Mahalanobis Distance p-value: The p-value gives the fraction of training data with an MD greater than or equal to the one for the given sample, assuming normally distributed data. The smaller the p-value, the less trustworthy the prediction. For highly non-normal X properties (e.g., fingerprints), the MD p-value is wildly inaccurate.

## Structural Similar Compounds

| Name               | 2425-85-6                                                                                            | N/A                         | 3-(4'-Acetylamino-1,2,3-triazin-5-ylideneamino)-5H-1,2,3-triazin-4-one |
|--------------------|------------------------------------------------------------------------------------------------------|-----------------------------|------------------------------------------------------------------------|
| Structure          |                                                                                                      |                             |                                                                        |
| Actual Endpoint    | Mutagen                                                                                              | Mutagen                     | Mutagen                                                                |
| Predicted Endpoint | Mutagen                                                                                              | Mutagen                     | Mutagen                                                                |
| Distance           | 0.537                                                                                                | 0.548                       | 0.549                                                                  |
| Reference          | Helma, C., Cramer, T., Kramer, S., and De Raedt, L., J. Chem. Inf. Comput. Sci., 2004, pp. 1402-1411 | Mut. Res. 280:233-244; 1992 | Mutagenesis 7(1):37-39; 1992                                           |

## Model Applicability

Unknown features are fingerprint features in the query molecule, but not found or appearing too infrequently in the training set.

1. All properties and OPS components are within expected ranges.

## Feature Contribution

### Top features for positive contribution

| Fingerprint | Bit/Smiles  | Feature Structure                                           | Score | Mutagen in training set |
|-------------|-------------|-------------------------------------------------------------|-------|-------------------------|
| SCFP_12     | -1038366601 | <br>[*]N[c]1:n:[*].[c]([*]):[c]2:[cH]:[*]:[cH]:[cH]:[c]:1:2 | 0.42  | 4 out of 4              |

|                                        |             |                                                                                                                                                 |        |                         |
|----------------------------------------|-------------|-------------------------------------------------------------------------------------------------------------------------------------------------|--------|-------------------------|
| SCFP_12                                | 2097816882  | 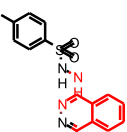<br>[*]N[c]1:n:[*]:[c]([*]):[c]2:[cH]:[cH]:[cH]:[cH]:[c]:1:2 | 0.42   | 4 out of 4              |
| SCFP_12                                | 1651620003  | <br>[*][c](:[*]):[c]1:[cH]:[cH]:[cH]:[cH]:[c]:1:[*]          | 0.377  | 575 out of 690          |
| Top Features for negative contribution |             |                                                                                                                                                 |        |                         |
| Fingerprint                            | Bit/Smiles  | Feature Structure                                                                                                                               | Score  | Mutagen in training set |
| SCFP_12                                | 182991870   | <br>[*]NS(=O)(=O)[c]([*])[*]                                 | -1.15  | 8 out of 48             |
| SCFP_12                                | -1247518081 | <br>[*]NS(=O)(=O)[c]1:[cH]:[cH]:[*]:[cH]:[cH]:1             | -1.01  | 6 out of 32             |
| SCFP_12                                | -2090779860 | <br>[*][c]1:[*]:[c]([*]):[c](Cl):n:n:1                     | -0.762 | 0 out of 2              |

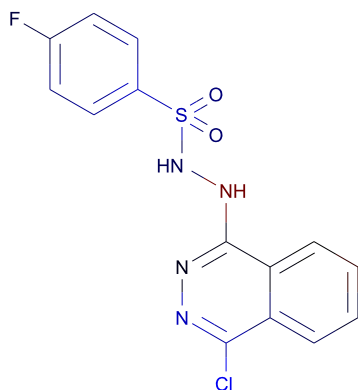

$C_{14}H_{10}ClFN_4O_2S$

Molecular Weight: 352.7712

ALogP: 3.248

Rotatable Bonds: 4

Acceptors: 5

Donors: 2

## Model Prediction

Prediction: Non-Mutagen

Probability: 0.56

Enrichment: 1

Bayesian Score: -6.09

Mahalanobis Distance: 10.9

Mahalanobis Distance p-value: 0.0495

Prediction: Positive if the Bayesian score is above the estimated best cutoff value from minimizing the false positive and false negative rate.

Probability: The estimated probability that the sample is in the positive category. This assumes that the Bayesian score follows a normal distribution and is different from the prediction using a cutoff.

Enrichment: An estimate of enrichment, that is, the increased likelihood (versus random) of this sample being in the category.

Bayesian Score: The standard Laplacian-modified Bayesian score.

Mahalanobis Distance: The Mahalanobis distance (MD) is the distance to the center of the training data. The larger the MD, the less trustworthy the prediction.

Mahalanobis Distance p-value: The p-value gives the fraction of training data with an MD greater than or equal to the one for the given sample, assuming normally distributed data. The smaller the p-value, the less trustworthy the prediction. For highly non-normal X properties (e.g., fingerprints), the MD p-value is wildly inaccurate.

## Structural Similar Compounds

| Name               | 31430-15-6                                       | 3-(4'-Acetylamino-<br>benzylidena-<br>mino)-5H-1;2;3-triazin-<br>[5;4b]indol-4-one | 97919-22-7                                       |
|--------------------|--------------------------------------------------|------------------------------------------------------------------------------------|--------------------------------------------------|
| Structure          |                                                  |                                                                                    |                                                  |
| Actual Endpoint    | Non-Mutagen                                      | Mutagen                                                                            | Non-Mutagen                                      |
| Predicted Endpoint | Non-Mutagen                                      | Mutagen                                                                            | Non-Mutagen                                      |
| Distance           | 0.550                                            | 0.560                                                                              | 0.561                                            |
| Reference          | Kazius et. al., J. Med. Chem. (2005) 48, 312-320 | Mutagenesis 7(1):37-39; 1992                                                       | Kazius et. al., J. Med. Chem. (2005) 48, 312-320 |

## Model Applicability

Unknown features are fingerprint features in the query molecule, but not found or appearing too infrequently in the training set.

1. All properties and OPS components are within expected ranges.

## Feature Contribution

| Top features for positive contribution |             |                                                                          |       |                         |
|----------------------------------------|-------------|--------------------------------------------------------------------------|-------|-------------------------|
| Fingerprint                            | Bit/Smiles  | Feature Structure                                                        | Score | Mutagen in training set |
| SCFP_12                                | -1038366601 | <br><chem>[*]N[c]1:n:[*].[c]([*]):[c]2:[cH]:[*]:[cH]:[cH]:[c]:1:2</chem> | 0.42  | 4 out of 4              |

|                                        |             |                                                                                                                                                 |        |                         |
|----------------------------------------|-------------|-------------------------------------------------------------------------------------------------------------------------------------------------|--------|-------------------------|
| SCFP_12                                | 2097816882  | 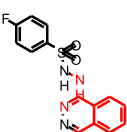<br>[*]N[c]1:n:[*]:[c]([*]):[c]2:[cH]:[cH]:[cH]:[cH]:[c]:1:2 | 0.42   | 4 out of 4              |
| SCFP_12                                | 1651620003  | <br>[*][c](:[*]):[c]([*]):[cH]:[cH]:[cH]:[cH]:[c]:1:[*]      | 0.377  | 575 out of 690          |
| Top Features for negative contribution |             |                                                                                                                                                 |        |                         |
| Fingerprint                            | Bit/Smiles  | Feature Structure                                                                                                                               | Score  | Mutagen in training set |
| SCFP_12                                | 182991870   | <br>[*]NS(=O)(=O)[c]([*])[*]                                 | -1.15  | 8 out of 48             |
| SCFP_12                                | -1247518081 | <br>[*]NS(=O)(=O)[c]1:[cH]:[cH]:[*]:[cH]:[cH]:1             | -1.01  | 6 out of 32             |
| SCFP_12                                | -2090779860 | <br>[*][c]1:[*]:[c]([*]):[c](Cl):n:n:1                     | -0.762 | 0 out of 2              |

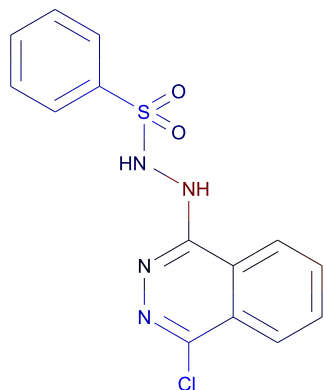

$C_{14}H_{11}ClN_4O_2S$

Molecular Weight: 334.78073

ALogP: 3.043

Rotatable Bonds: 4

Acceptors: 5

Donors: 2

## Model Prediction

Prediction: Non-Mutagen

Probability: 0.587

Enrichment: 1.05

Bayesian Score: -5.39

Mahalanobis Distance: 9.04

Mahalanobis Distance p-value: 0.812

Prediction: Positive if the Bayesian score is above the estimated best cutoff value from minimizing the false positive and false negative rate.

Probability: The estimated probability that the sample is in the positive category. This assumes that the Bayesian score follows a normal distribution and is different from the prediction using a cutoff.

Enrichment: An estimate of enrichment, that is, the increased likelihood (versus random) of this sample being in the category.

Bayesian Score: The standard Laplacian-modified Bayesian score.

Mahalanobis Distance: The Mahalanobis distance (MD) is the distance to the center of the training data. The larger the MD, the less trustworthy the prediction.

Mahalanobis Distance p-value: The p-value gives the fraction of training data with an MD greater than or equal to the one for the given sample, assuming normally distributed data. The smaller the p-value, the less trustworthy the prediction. For highly non-normal X properties (e.g., fingerprints), the MD p-value is wildly inaccurate.

## Structural Similar Compounds

| Name               | 97919-22-7                                       | 3778-76-5                                        | 31431-39-7                                       |
|--------------------|--------------------------------------------------|--------------------------------------------------|--------------------------------------------------|
| Structure          |                                                  |                                                  |                                                  |
| Actual Endpoint    | Non-Mutagen                                      | Mutagen                                          | Mutagen                                          |
| Predicted Endpoint | Non-Mutagen                                      | Mutagen                                          | Non-Mutagen                                      |
| Distance           | 0.534                                            | 0.536                                            | 0.562                                            |
| Reference          | Kazius et. al., J. Med. Chem. (2005) 48, 312-320 | Kazius et. al., J. Med. Chem. (2005) 48, 312-320 | Kazius et. al., J. Med. Chem. (2005) 48, 312-320 |

## Model Applicability

Unknown features are fingerprint features in the query molecule, but not found or appearing too infrequently in the training set.

1. All properties and OPS components are within expected ranges.

## Feature Contribution

### Top features for positive contribution

| Fingerprint | Bit/Smiles | Feature Structure                                            | Score | Mutagen in training set |
|-------------|------------|--------------------------------------------------------------|-------|-------------------------|
| SCFP_12     | 2097816882 | <br>[*]N[c]1:n:[*]f[c]([*]):[c]2:[cH]:[cH]:[cH]:[cH]:[c]:1:2 | 0.42  | 4 out of 4              |

|                                        |             |                                                                                                                                                             |        |                         |
|----------------------------------------|-------------|-------------------------------------------------------------------------------------------------------------------------------------------------------------|--------|-------------------------|
| SCFP_12                                | -1038366601 | 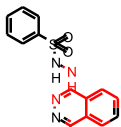<br><chem>[*]N[c]1:n:[*]:[c]([*]):[c]2:[cH]:[*]:[cH]:[cH]:[c]:1:2</chem> | 0.42   | 4 out of 4              |
| SCFP_12                                | 1651620003  | <br><chem>[*][c](:[*]):[c]1:[cH]:[cH]:[cH]:[cH]:[c]:1:[*]</chem>         | 0.377  | 575 out of 690          |
| Top Features for negative contribution |             |                                                                                                                                                             |        |                         |
| Fingerprint                            | Bit/Smiles  | Feature Structure                                                                                                                                           | Score  | Mutagen in training set |
| SCFP_12                                | 182991870   | <br><chem>[*]NS(=O)(=O)[c]([*]):[*]</chem>                               | -1.15  | 8 out of 48             |
| SCFP_12                                | -1247518081 | <br><chem>[*]NS(=O)(=O)[c]1:[cH]:[cH]:[*]:[cH]:[cH]:1</chem>            | -1.01  | 6 out of 32             |
| SCFP_12                                | -1703874785 | <br><chem>[*][c]1:[*]:n:[c](Cl):[c]2:[cH]:[cH]:[*]:[cH]:[c]:1:2</chem> | -0.762 | 0 out of 2              |

# Thalidomide

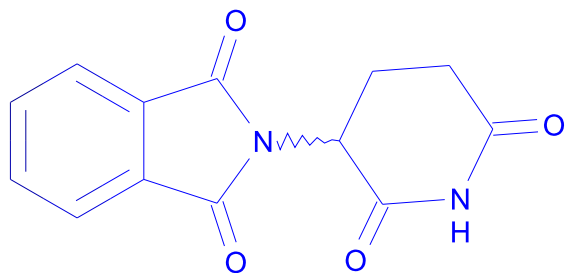

C<sub>13</sub>H<sub>10</sub>N<sub>2</sub>O<sub>4</sub>

Molecular Weight: 258.22949

ALogP: 9.7e-002

Rotatable Bonds: 1

Acceptors: 4

Donors: 1

## Model Prediction

Prediction: Non-Mutagen

Probability: 0.188

Enrichment: 0.338

Bayesian Score: -14.5

Mahalanobis Distance: 7.7

Mahalanobis Distance p-value: 0.998

Prediction: Positive if the Bayesian score is above the estimated best cutoff value from minimizing the false positive and false negative rate.

Probability: The estimated probability that the sample is in the positive category. This assumes that the Bayesian score follows a normal distribution and is different from the prediction using a cutoff.

Enrichment: An estimate of enrichment, that is, the increased likelihood (versus random) of this sample being in the category.

Bayesian Score: The standard Laplacian-modified Bayesian score.

Mahalanobis Distance: The Mahalanobis distance (MD) is the distance to the center of the training data. The larger the MD, the less trustworthy the prediction.

Mahalanobis Distance p-value: The p-value gives the fraction of training data with an MD greater than or equal to the one for the given sample, assuming normally distributed data. The smaller the p-value, the less trustworthy the prediction. For highly non-normal X properties (e.g., fingerprints), the MD p-value is wildly inaccurate.

# TOPKAT\_Ames\_Mutagenicity

## Structural Similar Compounds

| Name               | 50-35-1                                          | 25057-89-0                                       | 81-63-0                                          |
|--------------------|--------------------------------------------------|--------------------------------------------------|--------------------------------------------------|
| Structure          |                                                  |                                                  |                                                  |
| Actual Endpoint    | Non-Mutagen                                      | Non-Mutagen                                      | Mutagen                                          |
| Predicted Endpoint | Non-Mutagen                                      | Non-Mutagen                                      | Mutagen                                          |
| Distance           | 0.000                                            | 0.509                                            | 0.539                                            |
| Reference          | Kazius et. al., J. Med. Chem. (2005) 48, 312-320 | Kazius et. al., J. Med. Chem. (2005) 48, 312-320 | Kazius et. al., J. Med. Chem. (2005) 48, 312-320 |

## Model Applicability

Unknown features are fingerprint features in the query molecule, but not found or appearing too infrequently in the training set.

1. All properties and OPS components are within expected ranges.

## Feature Contribution

### Top features for positive contribution

| Fingerprint | Bit/Smiles | Feature Structure                                                   | Score | Mutagen in training set |
|-------------|------------|---------------------------------------------------------------------|-------|-------------------------|
| SCFP_12     | 280592283  | <br><chem>*[C]([*])N1C(=O)[c]2:[cH]:[cH]:[cH]:[cH]:[c]:2C1=O</chem> | 0.197 | 3 out of 4              |

|                                        |             |                                                                                                                                |        |                         |
|----------------------------------------|-------------|--------------------------------------------------------------------------------------------------------------------------------|--------|-------------------------|
| SCFP_12                                | -1379591900 | 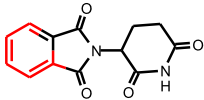<br>[*]:[c]1:[*]:[cH]:[cH]<br>]:[cH]:[cH]:1 | 0.108  | 1480 out of 2326        |
| SCFP_12                                | -496409612  | <br>[*]:[cH]:[cH]:[cH]:[*]<br>]             | 0.0771 | 2616 out of 4239        |
| Top Features for negative contribution |             |                                                                                                                                |        |                         |
| Fingerprint                            | Bit/Smiles  | Feature Structure                                                                                                              | Score  | Mutagen in training set |
| SCFP_12                                | 1947881227  | <br>[*]N[*])C1CCC(=[*])([*]<br>C1=[*]       | -1.9   | 0 out of 10             |
| SCFP_12                                | 395945879   | <br>[*]C1[*]CC(=O)NC1=O                   | -1.19  | 0 out of 4              |
| SCFP_12                                | -1946889102 | <br>[*]CC(N[*])[*]C(=[*]<br>))[*]         | -0.69  | 25 out of 89            |

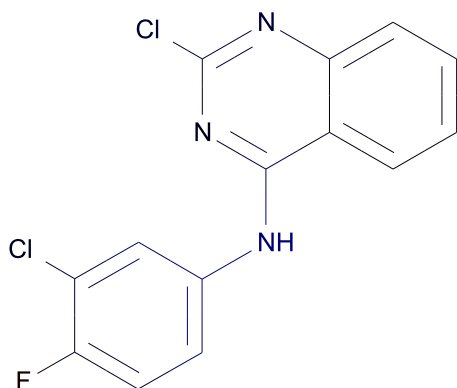

$C_{14}H_8Cl_2FN_3$

Molecular Weight: 308.13782

ALogP: 5.202

Rotatable Bonds: 2

Acceptors: 3

Donors: 1

## Model Prediction

Prediction: Non-Toxic

Probability: 0.425

Enrichment: 0.809

Bayesian Score: -3.55

Mahalanobis Distance: 8.91

Mahalanobis Distance p-value: 0.204

Prediction: Positive if the Bayesian score is above the estimated best cutoff value from minimizing the false positive and false negative rate.

Probability: The estimated probability that the sample is in the positive category. This assumes that the Bayesian score follows a normal distribution and is different from the prediction using a cutoff.

Enrichment: An estimate of enrichment, that is, the increased likelihood (versus random) of this sample being in the category.

Bayesian Score: The standard Laplacian-modified Bayesian score.

Mahalanobis Distance: The Mahalanobis distance (MD) is the distance to the center of the training data. The larger the MD, the less trustworthy the prediction.

Mahalanobis Distance p-value: The p-value gives the fraction of training data with an MD greater than or equal to the one for the given sample, assuming normally distributed data. The smaller the p-value, the less trustworthy the prediction. For highly non-normal X properties (e.g., fingerprints), the MD p-value is wildly inaccurate.

## Structural Similar Compounds

| Name               | Triclabendazole                | Meclofenamate Sodium (Free acid form) | Mequitazine                 |
|--------------------|--------------------------------|---------------------------------------|-----------------------------|
| Structure          |                                |                                       |                             |
| Actual Endpoint    | Toxic                          | Non-Toxic                             | Toxic                       |
| Predicted Endpoint | Toxic                          | Non-Toxic                             | Toxic                       |
| Distance           | 0.587                          | 0.595                                 | 0.621                       |
| Reference          | Toxicology 43(3):283-287; 1987 | Fundam Appl Toxicol 5:665-671; 1985   | Oyo Yakuri 21:881-892; 1981 |

## Model Applicability

Unknown features are fingerprint features in the query molecule, but not found or appearing too infrequently in the training set.

1. All properties and OPS components are within expected ranges.

## Feature Contribution

### Top features for positive contribution

| Fingerprint | Bit/Smiles | Feature Structure                                                   | Score | Toxic in training set |
|-------------|------------|---------------------------------------------------------------------|-------|-----------------------|
| SCFP_6      | 129215346  | <p><chem>[*]N[c]1n:[*]:n:[c]2:[cH]:[*]:[cH]:[cH]:[c]:1:2</chem></p> | 0.381 | 2 out of 2            |

| SCFP_6                                 | -1794884847 | 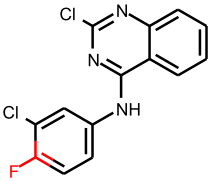<br><chem>[*]:[c](:[*])F</chem>                                   | 0.202  | 6 out of 9            |
|----------------------------------------|-------------|------------------------------------------------------------------------------------------------------------------------------------------------------|--------|-----------------------|
| SCFP_6                                 | -730654023  | <br><chem>[*][c](:[*]):[c](F):[cH]:[*]</chem>                     | 0.202  | 6 out of 9            |
| Top Features for negative contribution |             |                                                                                                                                                      |        |                       |
| Fingerprint                            | Bit/Smiles  | Feature Structure                                                                                                                                    | Score  | Toxic in training set |
| SCFP_6                                 | -300914917  | <br><chem>[*][c]1:[*]:[cH]:[cH]:[c](N[c](:[*]):[*]):[cH]:1</chem> | -0.718 | 0 out of 2            |
| SCFP_6                                 | 1807097289  | <br><chem>[*]N[c]1:[cH]:[*]:[c]([*]):[c](Cl):[cH]:1</chem>       | -0.594 | 1 out of 5            |
| SCFP_6                                 | -1380909229 | <br><chem>[*]N[c]1:[cH]:[*]:[c]([*]):[cH]:[cH]:1</chem>         | -0.449 | 6 out of 19           |

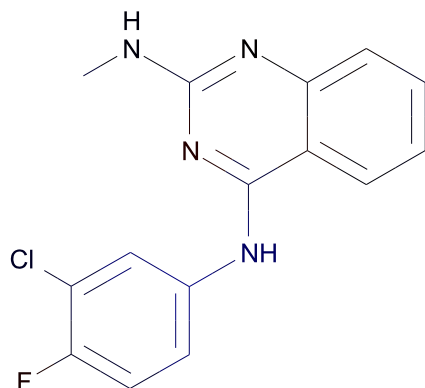

$C_{15}H_{12}ClFN_4$

Molecular Weight: 302.73398

ALogP: 4.677

Rotatable Bonds: 3

Acceptors: 4

Donors: 2

## Model Prediction

Prediction: Non-Toxic

Probability: 0.443

Enrichment: 0.842

Bayesian Score: -2.99

Mahalanobis Distance: 9.37

Mahalanobis Distance p-value: 0.0899

Prediction: Positive if the Bayesian score is above the estimated best cutoff value from minimizing the false positive and false negative rate.

Probability: The estimated probability that the sample is in the positive category. This assumes that the Bayesian score follows a normal distribution and is different from the prediction using a cutoff.

Enrichment: An estimate of enrichment, that is, the increased likelihood (versus random) of this sample being in the category.

Bayesian Score: The standard Laplacian-modified Bayesian score.

Mahalanobis Distance: The Mahalanobis distance (MD) is the distance to the center of the training data. The larger the MD, the less trustworthy the prediction.

Mahalanobis Distance p-value: The p-value gives the fraction of training data with an MD greater than or equal to the one for the given sample, assuming normally distributed data. The smaller the p-value, the less trustworthy the prediction. For highly non-normal X properties (e.g., fingerprints), the MD p-value is wildly inaccurate.

## Structural Similar Compounds

| Name               | Meclofenamate Sodium (Free acid form) | Flufenamic Acid                   | Carprofen                                 |
|--------------------|---------------------------------------|-----------------------------------|-------------------------------------------|
| Structure          |                                       |                                   |                                           |
| Actual Endpoint    | Non-Toxic                             | Non-Toxic                         | Non-Toxic                                 |
| Predicted Endpoint | Non-Toxic                             | Non-Toxic                         | Non-Toxic                                 |
| Distance           | 0.505                                 | 0.557                             | 0.589                                     |
| Reference          | Fundam Appl Toxicol 5:665-671; 1985   | Kiso to Rinsho 13:3302-3313; 1979 | Toxicol Appl Pharmacol 56(3):376-82; 1980 |

## Model Applicability

Unknown features are fingerprint features in the query molecule, but not found or appearing too infrequently in the training set.

1. All properties and OPS components are within expected ranges.

## Feature Contribution

### Top features for positive contribution

| Fingerprint | Bit/Smiles | Feature Structure | Score | Toxic in training set |
|-------------|------------|-------------------|-------|-----------------------|
| SCFP_6      | 136418580  | <br>[*]NC         | 0.381 | 2 out of 2            |

|                                        |             |                                                                                                                                                       |        |                       |
|----------------------------------------|-------------|-------------------------------------------------------------------------------------------------------------------------------------------------------|--------|-----------------------|
| SCFP_6                                 | -1551584806 | 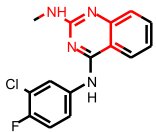<br><chem>[*]N[c]1:n:[*]:[c](:[*]):[c](:[cH]):[*]):n:1</chem>      | 0.381  | 2 out of 2            |
| SCFP_6                                 | -1545804258 | <br><chem>[*]N[c]1:n:[*]:[c](:[*]):[c](N[*]):n:1</chem>            | 0.381  | 2 out of 2            |
| Top Features for negative contribution |             |                                                                                                                                                       |        |                       |
| Fingerprint                            | Bit/Smiles  | Feature Structure                                                                                                                                     | Score  | Toxic in training set |
| SCFP_6                                 | 18117904    | <br><chem>[*]:[c](:[*])NC</chem>                                   | -0.945 | 0 out of 3            |
| SCFP_6                                 | -300914917  | <br><chem>[*][c]1:[*]:[cH]:[cH]:[c](N[c](:[*]):[*]):[cH]:1</chem> | -0.718 | 0 out of 2            |
| SCFP_6                                 | 1807097289  | <br><chem>[*]N[c]1:[cH]:[*]:[c]([*]):[c](Cl):[cH]:1</chem>       | -0.594 | 1 out of 5            |

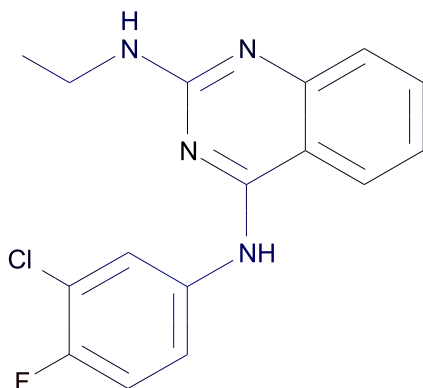

$C_{16}H_{14}ClFN_4$

Molecular Weight: 316.76056

ALogP: 5.025

Rotatable Bonds: 4

Acceptors: 4

Donors: 2

## Model Prediction

Prediction: Non-Toxic

Probability: 0.395

Enrichment: 0.751

Bayesian Score: -4.59

Mahalanobis Distance: 10.1

Mahalanobis Distance p-value: 0.0147

Prediction: Positive if the Bayesian score is above the estimated best cutoff value from minimizing the false positive and false negative rate.

Probability: The estimated probability that the sample is in the positive category. This assumes that the Bayesian score follows a normal distribution and is different from the prediction using a cutoff.

Enrichment: An estimate of enrichment, that is, the increased likelihood (versus random) of this sample being in the category.

Bayesian Score: The standard Laplacian-modified Bayesian score.

Mahalanobis Distance: The Mahalanobis distance (MD) is the distance to the center of the training data. The larger the MD, the less trustworthy the prediction.

Mahalanobis Distance p-value: The p-value gives the fraction of training data with an MD greater than or equal to the one for the given sample, assuming normally distributed data. The smaller the p-value, the less trustworthy the prediction. For highly non-normal X properties (e.g., fingerprints), the MD p-value is wildly inaccurate.

## Structural Similar Compounds

| Name               | Meclofenamate Sodium<br>(Free acid form) | Flufenamic Acid                       | Amsacrine                                |
|--------------------|------------------------------------------|---------------------------------------|------------------------------------------|
| Structure          |                                          |                                       |                                          |
| Actual Endpoint    | Non-Toxic                                | Non-Toxic                             | Toxic                                    |
| Predicted Endpoint | Non-Toxic                                | Non-Toxic                             | Toxic                                    |
| Distance           | 0.534                                    | 0.575                                 | 0.602                                    |
| Reference          | Fundam Appl Toxicol<br>5:665-671; 1985   | Kiso to Rinsho 13:3302-<br>3313; 1979 | Fundam Appl Toxicol<br>7(2):214-20; 1986 |

## Model Applicability

Unknown features are fingerprint features in the query molecule, but not found or appearing too infrequently in the training set.

1. All properties and OPS components are within expected ranges.

## Feature Contribution

### Top features for positive contribution

| Fingerprint | Bit/Smiles | Feature Structure                                                                                    | Score | Toxic in training set |
|-------------|------------|------------------------------------------------------------------------------------------------------|-------|-----------------------|
| SCFP_6      | 129215346  | <br><chem>[*]N[c]1:n:[*]:n:[c]2</chem><br><chem>: [cH]:[*]:[cH]:[cH]:</chem><br><chem>[c]:1:2</chem> | 0.381 | 2 out of 2            |

|                                        |             |                                                                                                                                                        |        |                       |
|----------------------------------------|-------------|--------------------------------------------------------------------------------------------------------------------------------------------------------|--------|-----------------------|
| SCFP_6                                 | -1551584806 | 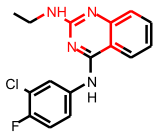<br><chem>[*]N[c]1:n:[*]:[c](:[*]):[c](:[cH]):[*]:n:1</chem>        | 0.381  | 2 out of 2            |
| SCFP_6                                 | -1545804258 | <br><chem>[*]N[c]1:n:[*]:[c](:[*]):[c](N[*]):n:1</chem>             | 0.381  | 2 out of 2            |
| Top Features for negative contribution |             |                                                                                                                                                        |        |                       |
| Fingerprint                            | Bit/Smiles  | Feature Structure                                                                                                                                      | Score  | Toxic in training set |
| SCFP_6                                 | 18117904    | <br><chem>[*]:[c](:[*])NC</chem>                                    | -0.945 | 0 out of 3            |
| SCFP_6                                 | -300914917  | <br><chem>[*][c]1:[*]:[cH]:[cH]:[c](N[c](:[*]):[*]):[cH]:1</chem> | -0.718 | 0 out of 2            |
| SCFP_6                                 | 1807097289  | <br><chem>[*]N[c]1:[cH]:[*]:[c]([*]):[c](Cl):[cH]:1</chem>        | -0.594 | 1 out of 5            |

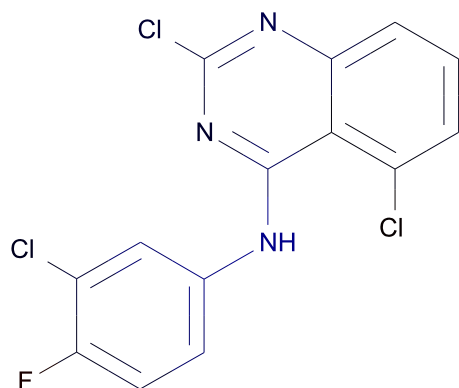

$C_{14}H_7Cl_3FN_3$

Molecular Weight: 342.58288

ALogP: 5.867

Rotatable Bonds: 2

Acceptors: 3

Donors: 1

## Model Prediction

Prediction: Non-Toxic

Probability: 0.411

Enrichment: 0.781

Bayesian Score: -4.05

Mahalanobis Distance: 9.09

Mahalanobis Distance p-value: 0.152

Prediction: Positive if the Bayesian score is above the estimated best cutoff value from minimizing the false positive and false negative rate.

Probability: The estimated probability that the sample is in the positive category. This assumes that the Bayesian score follows a normal distribution and is different from the prediction using a cutoff.

Enrichment: An estimate of enrichment, that is, the increased likelihood (versus random) of this sample being in the category.

Bayesian Score: The standard Laplacian-modified Bayesian score.

Mahalanobis Distance: The Mahalanobis distance (MD) is the distance to the center of the training data. The larger the MD, the less trustworthy the prediction.

Mahalanobis Distance p-value: The p-value gives the fraction of training data with an MD greater than or equal to the one for the given sample, assuming normally distributed data. The smaller the p-value, the less trustworthy the prediction. For highly non-normal X properties (e.g., fingerprints), the MD p-value is wildly inaccurate.

## Structural Similar Compounds

| Name               | Triclabendazole                | Benzbromarone                         | Meclofenamate Sodium (Free acid form) |
|--------------------|--------------------------------|---------------------------------------|---------------------------------------|
| Structure          |                                |                                       |                                       |
| Actual Endpoint    | Toxic                          | Toxic                                 | Non-Toxic                             |
| Predicted Endpoint | Toxic                          | Toxic                                 | Non-Toxic                             |
| Distance           | 0.555                          | 0.624                                 | 0.626                                 |
| Reference          | Toxicology 43(3):283-287; 1987 | Shinryo to Shinaku 16:1521-1545; 1979 | Fundam Appl Toxicol 5:665-671; 1985   |

## Model Applicability

Unknown features are fingerprint features in the query molecule, but not found or appearing too infrequently in the training set.

1. All properties and OPS components are within expected ranges.

## Feature Contribution

### Top features for positive contribution

| Fingerprint | Bit/Smiles  | Feature Structure               | Score | Toxic in training set |
|-------------|-------------|---------------------------------|-------|-----------------------|
| SCFP_6      | -1794884847 | <br><chem>[*]:[c](:[*])F</chem> | 0.202 | 6 out of 9            |

|                                        |             |                                                                                                                                                      |        |                       |
|----------------------------------------|-------------|------------------------------------------------------------------------------------------------------------------------------------------------------|--------|-----------------------|
| SCFP_6                                 | -730654023  | 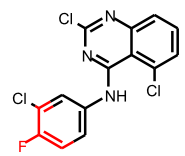<br><chem>[*][c](:[*]):[c](F):[cH]:[*]</chem>                     | 0.202  | 6 out of 9            |
| SCFP_6                                 | -1378360678 | <br><chem>[*]:[c]1:[*]:[cH]:[cH]:[cH]:[c]:1Cl</chem>              | 0.137  | 17 out of 28          |
| Top Features for negative contribution |             |                                                                                                                                                      |        |                       |
| Fingerprint                            | Bit/Smiles  | Feature Structure                                                                                                                                    | Score  | Toxic in training set |
| SCFP_6                                 | -300914917  | <br><chem>[*][c]1:[*]:[cH]:[cH]:[c](N[c](:[*]):[*]):[cH]:1</chem> | -0.718 | 0 out of 2            |
| SCFP_6                                 | 1807097289  | <br><chem>[*]N[c]1:[cH]:[*]:[c]([*]):[c](Cl):[cH]:1</chem>       | -0.594 | 1 out of 5            |
| SCFP_6                                 | -1380909229 | <br><chem>[*]N[c]1:[cH]:[*]:[c]([*]):[cH]:[cH]:1</chem>         | -0.449 | 6 out of 19           |

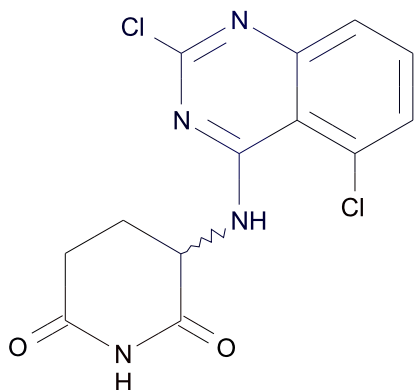
 $C_{13}H_{10}Cl_2N_4O_2$ 

Molecular Weight: 325.15009

ALogP: 2.49

Rotatable Bonds: 2

Acceptors: 5

Donors: 2

## Model Prediction

Prediction: Non-Toxic

Probability: 0.452

Enrichment: 0.859

Bayesian Score: -2.71

Mahalanobis Distance: 10.3

Mahalanobis Distance p-value: 0.0103

Prediction: Positive if the Bayesian score is above the estimated best cutoff value from minimizing the false positive and false negative rate.

Probability: The estimated probability that the sample is in the positive category. This assumes that the Bayesian score follows a normal distribution and is different from the prediction using a cutoff.

Enrichment: An estimate of enrichment, that is, the increased likelihood (versus random) of this sample being in the category.

Bayesian Score: The standard Laplacian-modified Bayesian score.

Mahalanobis Distance: The Mahalanobis distance (MD) is the distance to the center of the training data. The larger the MD, the less trustworthy the prediction.

Mahalanobis Distance p-value: The p-value gives the fraction of training data with an MD greater than or equal to the one for the given sample, assuming normally distributed data. The smaller the p-value, the less trustworthy the prediction. For highly non-normal X properties (e.g., fingerprints), the MD p-value is wildly inaccurate.

## Structural Similar Compounds

| Name               | D&C Yellow 8                       | Sulfonylurea Gliclazide            | Cyclopiazonic Acid                        |
|--------------------|------------------------------------|------------------------------------|-------------------------------------------|
| Structure          |                                    |                                    |                                           |
| Actual Endpoint    | Non-Toxic                          | Toxic                              | Non-Toxic                                 |
| Predicted Endpoint | Non-Toxic                          | Toxic                              | Non-Toxic                                 |
| Distance           | 0.528                              | 0.562                              | 0.611                                     |
| Reference          | Food Chem Toxicol 24:819-823; 1986 | Yakuri to Chiryo 9:3551-3571; 1981 | J Toxicol Environ Health 14:585-594; 1984 |

## Model Applicability

Unknown features are fingerprint features in the query molecule, but not found or appearing too infrequently in the training set.

1. All properties and OPS components are within expected ranges.

## Feature Contribution

### Top features for positive contribution

| Fingerprint | Bit/Smiles | Feature Structure                  | Score | Toxic in training set |
|-------------|------------|------------------------------------|-------|-----------------------|
| SCFP_6      | 1631785938 | <br><chem>[*]C(=O)NC(=O)[*]</chem> | 0.255 | 3 out of 4            |

|                                        |             |                                                                                                                                                            |        |                       |
|----------------------------------------|-------------|------------------------------------------------------------------------------------------------------------------------------------------------------------|--------|-----------------------|
| SCFP_6                                 | -1378360678 | 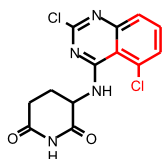<br><chem>[*]:[c]1:[*]:[cH]:[cH]:[cH]:[c]:1Cl</chem>                    | 0.137  | 17 out of 28          |
| SCFP_6                                 | 622342378   | <br><chem>[*][c]1:[*]:[c]([*]):[c]2:[cH]:[*]:[cH]:[cH]:[c]:2:n:1</chem> | 0.114  | 6 out of 10           |
| Top Features for negative contribution |             |                                                                                                                                                            |        |                       |
| Fingerprint                            | Bit/Smiles  | Feature Structure                                                                                                                                          | Score  | Toxic in training set |
| SCFP_6                                 | 18117904    | <br><chem>[*]:[c](:[*])NC</chem>                                        | -0.945 | 0 out of 3            |
| SCFP_6                                 | 60071962    | <br><chem>[*][c]1:[*]:[c]([*]):n:[c](Cl):n:1</chem>                    | -0.422 | 0 out of 1            |
| SCFP_6                                 | -1286592310 | <br><chem>[*]:n:[c](Cl):n:[*]</chem>                                  | -0.422 | 0 out of 1            |

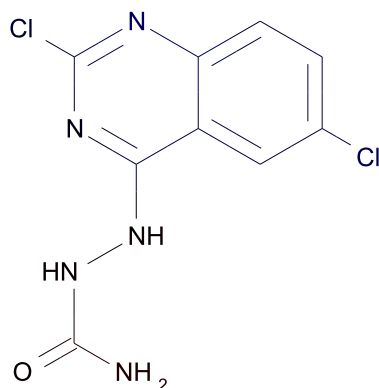

$C_9H_7Cl_2N_5O$

Molecular Weight: 272.09078

ALogP: 2.379

Rotatable Bonds: 2

Acceptors: 4

Donors: 3

## Model Prediction

Prediction: Non-Toxic

Probability: 0.465

Enrichment: 0.885

Bayesian Score: -2.3

Mahalanobis Distance: 8.39

Mahalanobis Distance p-value: 0.42

Prediction: Positive if the Bayesian score is above the estimated best cutoff value from minimizing the false positive and false negative rate.

Probability: The estimated probability that the sample is in the positive category. This assumes that the Bayesian score follows a normal distribution and is different from the prediction using a cutoff.

Enrichment: An estimate of enrichment, that is, the increased likelihood (versus random) of this sample being in the category.

Bayesian Score: The standard Laplacian-modified Bayesian score.

Mahalanobis Distance: The Mahalanobis distance (MD) is the distance to the center of the training data. The larger the MD, the less trustworthy the prediction.

Mahalanobis Distance p-value: The p-value gives the fraction of training data with an MD greater than or equal to the one for the given sample, assuming normally distributed data. The smaller the p-value, the less trustworthy the prediction. For highly non-normal X properties (e.g., fingerprints), the MD p-value is wildly inaccurate.

## Structural Similar Compounds

| Name               | Guanabenz                                  | Caffeic Acid                              | Sulfonylurea Gliclazide            |
|--------------------|--------------------------------------------|-------------------------------------------|------------------------------------|
| Structure          |                                            |                                           |                                    |
| Actual Endpoint    | Toxic                                      | Toxic                                     | Toxic                              |
| Predicted Endpoint | Toxic                                      | Toxic                                     | Toxic                              |
| Distance           | 0.609                                      | 0.624                                     | 0.666                              |
| Reference          | Journal of Toxic Sciences 11:107-119; 1982 | Toxicol Appl Pharmacol 36(2):227-37; 1976 | Yakuri to Chiryo 9:3551-3571; 1981 |

## Model Applicability

Unknown features are fingerprint features in the query molecule, but not found or appearing too infrequently in the training set.

1. All properties and OPS components are within expected ranges.

## Feature Contribution

### Top features for positive contribution

| Fingerprint | Bit/Smiles  | Feature Structure            | Score | Toxic in training set |
|-------------|-------------|------------------------------|-------|-----------------------|
| SCFP_6      | -1357949052 | <br><chem>[*]C(=[*])N</chem> | 0.453 | 8 out of 9            |

|                                        |             |                                                                                                                                                                                                    |        |                       |
|----------------------------------------|-------------|----------------------------------------------------------------------------------------------------------------------------------------------------------------------------------------------------|--------|-----------------------|
| SCFP_6                                 | 129215346   | <br><chem>[*]N[c]1:n:[*]:n:[c]2</chem><br><chem>: [cH]:[*]:[cH]:[cH]:</chem><br><chem>[c]:1:2</chem>            | 0.381  | 2 out of 2            |
| SCFP_6                                 | -1378360678 | <br><chem>[*]:[c]1:[*]:[cH]:[cH</chem><br><chem>]:[cH]:[c]:1Cl</chem>                                           | 0.137  | 17 out of 28          |
| Top Features for negative contribution |             |                                                                                                                                                                                                    |        |                       |
| Fingerprint                            | Bit/Smiles  | Feature Structure                                                                                                                                                                                  | Score  | Toxic in training set |
| SCFP_6                                 | 60071962    | <br><chem>[*][c]1:[*]:[c]([*])</chem><br><chem>:n:[c](Cl):n:1</chem>                                            | -0.422 | 0 out of 1            |
| SCFP_6                                 | 1808332909  | <br><chem>[*][c](:[*]):[c]1:[cH</chem><br><chem>]:[c](Cl):[cH]:[*]:[</chem><br><chem>c]:1:[*]</chem>           | -0.422 | 0 out of 1            |
| SCFP_6                                 | -182622233  | <br><chem>[*][c]1:[*]:[c]([*]):</chem><br><chem>[c]2:[cH]:[c](Cl):[c</chem><br><chem>H]:[cH]:[c]:2:n:1</chem> | -0.422 | 0 out of 1            |

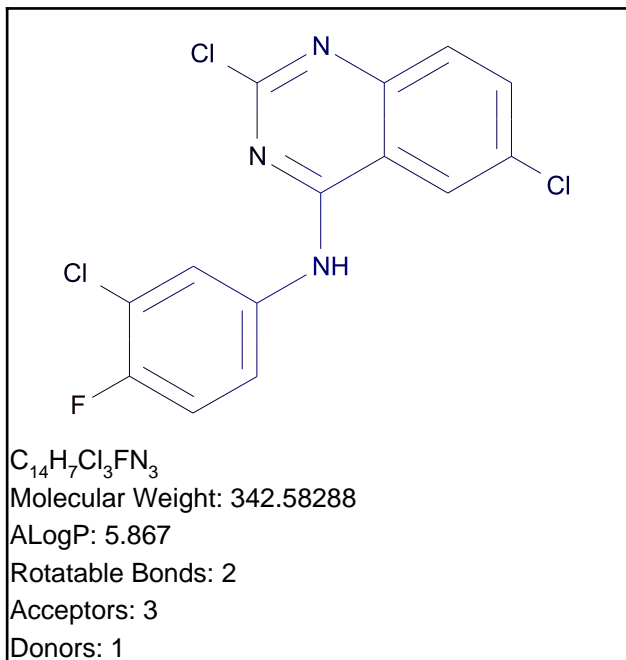

### Model Prediction

Prediction: Non-Toxic

Probability: 0.387

Enrichment: 0.736

Bayesian Score: -4.88

Mahalanobis Distance: 8.98

Mahalanobis Distance p-value: 0.184

Prediction: Positive if the Bayesian score is above the estimated best cutoff value from minimizing the false positive and false negative rate.

Probability: The estimated probability that the sample is in the positive category. This assumes that the Bayesian score follows a normal distribution and is different from the prediction using a cutoff.

Enrichment: An estimate of enrichment, that is, the increased likelihood (versus random) of this sample being in the category.

Bayesian Score: The standard Laplacian-modified Bayesian score.

Mahalanobis Distance: The Mahalanobis distance (MD) is the distance to the center of the training data. The larger the MD, the less trustworthy the prediction.

Mahalanobis Distance p-value: The p-value gives the fraction of training data with an MD greater than or equal to the one for the given sample, assuming normally distributed data. The smaller the p-value, the less trustworthy the prediction. For highly non-normal X properties (e.g., fingerprints), the MD p-value is wildly inaccurate.

### Structural Similar Compounds

| Name               | Triclabendazole                                                                     | Benzbromarone                                                                       | Meclofenamate Sodium (Free acid form)                                               |
|--------------------|-------------------------------------------------------------------------------------|-------------------------------------------------------------------------------------|-------------------------------------------------------------------------------------|
| Structure          | 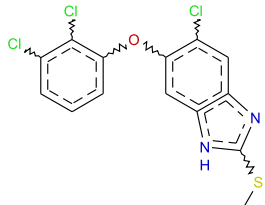 |  |  |
| Actual Endpoint    | Toxic                                                                               | Toxic                                                                               | Non-Toxic                                                                           |
| Predicted Endpoint | Toxic                                                                               | Toxic                                                                               | Non-Toxic                                                                           |
| Distance           | 0.561                                                                               | 0.630                                                                               | 0.633                                                                               |
| Reference          | Toxicology 43(3):283-287; 1987                                                      | Shinryo to Shinaku 16:1521-1545; 1979                                               | Fundam Appl Toxicol 5:665-671; 1985                                                 |

### Model Applicability

Unknown features are fingerprint features in the query molecule, but not found or appearing too infrequently in the training set.

1. All properties and OPS components are within expected ranges.

### Feature Contribution

#### Top features for positive contribution

| Fingerprint | Bit/Smiles | Feature Structure                                                                                                                                                                         | Score | Toxic in training set |
|-------------|------------|-------------------------------------------------------------------------------------------------------------------------------------------------------------------------------------------|-------|-----------------------|
| SCFP_6      | 129215346  | 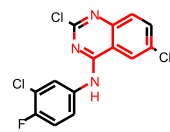<br><chem>[*]N[c]1:n:[*]:n:[c]2</chem><br><chem>: [cH]:[*]:[cH]:[cH]:</chem><br><chem>[c]:1:2</chem> | 0.381 | 2 out of 2            |

|                                        |             |                                                                                                                                                      |        |                       |
|----------------------------------------|-------------|------------------------------------------------------------------------------------------------------------------------------------------------------|--------|-----------------------|
| SCFP_6                                 | -730654023  | 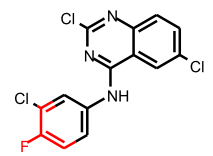<br><chem>[*][c](:[*]):[c](F):[cH]:[*]</chem>                     | 0.202  | 6 out of 9            |
| SCFP_6                                 | -1794884847 | <br><chem>[*]:[c](:[*])F</chem>                                   | 0.202  | 6 out of 9            |
| Top Features for negative contribution |             |                                                                                                                                                      |        |                       |
| Fingerprint                            | Bit/Smiles  | Feature Structure                                                                                                                                    | Score  | Toxic in training set |
| SCFP_6                                 | -300914917  | <br><chem>[*][c]1:[*]:[cH]:[cH]:[c](N[c](:[*]):[*]):[cH]:1</chem> | -0.718 | 0 out of 2            |
| SCFP_6                                 | 1807097289  | <br><chem>[*]N[c]1:[cH]:[*]:[c]([*]):[c](Cl):[cH]:1</chem>       | -0.594 | 1 out of 5            |
| SCFP_6                                 | -1380909229 | <br><chem>[*]N[c]1:[cH]:[*]:[c]([*]):[cH]:[cH]:1</chem>         | -0.449 | 6 out of 19           |

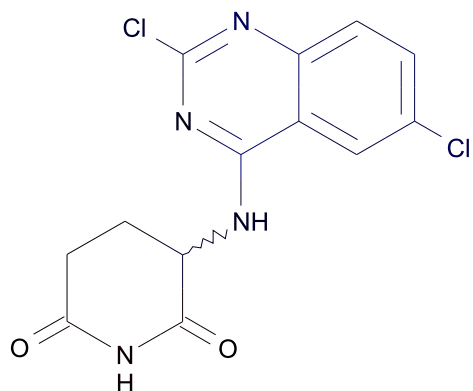

$C_{13}H_{10}Cl_2N_4O_2$

Molecular Weight: 325.15009

ALogP: 2.49

Rotatable Bonds: 2

Acceptors: 5

Donors: 2

## Model Prediction

Prediction: Non-Toxic

Probability: 0.425

Enrichment: 0.809

Bayesian Score: -3.55

Mahalanobis Distance: 9.55

Mahalanobis Distance p-value: 0.0613

Prediction: Positive if the Bayesian score is above the estimated best cutoff value from minimizing the false positive and false negative rate.

Probability: The estimated probability that the sample is in the positive category. This assumes that the Bayesian score follows a normal distribution and is different from the prediction using a cutoff.

Enrichment: An estimate of enrichment, that is, the increased likelihood (versus random) of this sample being in the category.

Bayesian Score: The standard Laplacian-modified Bayesian score.

Mahalanobis Distance: The Mahalanobis distance (MD) is the distance to the center of the training data. The larger the MD, the less trustworthy the prediction.

Mahalanobis Distance p-value: The p-value gives the fraction of training data with an MD greater than or equal to the one for the given sample, assuming normally distributed data. The smaller the p-value, the less trustworthy the prediction. For highly non-normal X properties (e.g., fingerprints), the MD p-value is wildly inaccurate.

## Structural Similar Compounds

| Name               | D&C Yellow 8                       | Sulfonylurea Gliclazide            | Triclopyr                           |
|--------------------|------------------------------------|------------------------------------|-------------------------------------|
| Structure          |                                    |                                    |                                     |
| Actual Endpoint    | Non-Toxic                          | Toxic                              | Non-Toxic                           |
| Predicted Endpoint | Non-Toxic                          | Toxic                              | Non-Toxic                           |
| Distance           | 0.533                              | 0.562                              | 0.618                               |
| Reference          | Food Chem Toxicol 24:819-823; 1986 | Yakuri to Chiryo 9:3551-3571; 1981 | Fundam Appl Toxicol 4:872-882; 1984 |

## Model Applicability

Unknown features are fingerprint features in the query molecule, but not found or appearing too infrequently in the training set.

1. All properties and OPS components are within expected ranges.

## Feature Contribution

### Top features for positive contribution

| Fingerprint | Bit/Smiles | Feature Structure                                                                                    | Score | Toxic in training set |
|-------------|------------|------------------------------------------------------------------------------------------------------|-------|-----------------------|
| SCFP_6      | 129215346  | <br><chem>[*]N[c]1:n:[*]:n:[c]2</chem><br><chem>: [cH]:[*]:[cH]:[cH]:</chem><br><chem>[c]:1:2</chem> | 0.381 | 2 out of 2            |

|                                        |             |                                                                                                                                                       |        |                       |
|----------------------------------------|-------------|-------------------------------------------------------------------------------------------------------------------------------------------------------|--------|-----------------------|
| SCFP_6                                 | 1631785938  | 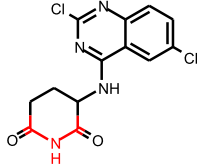<br><chem>[*]C(=[*])NC(=[*])[*]</chem>                             | 0.255  | 3 out of 4            |
| SCFP_6                                 | -1378360678 | <br><chem>[*]:[c]1:[*]:[cH]:[cH]:[cH]:[c]:1Cl</chem>               | 0.137  | 17 out of 28          |
| Top Features for negative contribution |             |                                                                                                                                                       |        |                       |
| Fingerprint                            | Bit/Smiles  | Feature Structure                                                                                                                                     | Score  | Toxic in training set |
| SCFP_6                                 | 18117904    | <br><chem>[*]:[c](:[*])NC</chem>                                   | -0.945 | 0 out of 3            |
| SCFP_6                                 | 1808332909  | <br><chem>[*][c](:[*]):[c]1:[cH]:[c](Cl):[cH]:[*]:[c]:1[*]</chem> | -0.422 | 0 out of 1            |
| SCFP_6                                 | 60071962    | <br><chem>[*][c]1:[*]:[c](:[*]):n:[c](Cl):n:1</chem>             | -0.422 | 0 out of 1            |

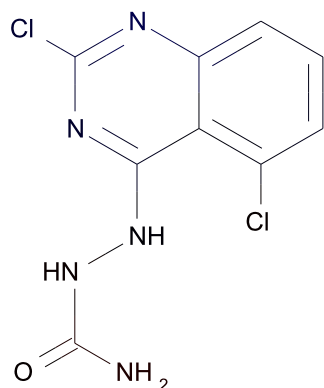

$C_9H_7Cl_2N_5O$

Molecular Weight: 272.09077

ALogP: 2.379

Rotatable Bonds: 2

Acceptors: 4

Donors: 3

## Model Prediction

Prediction: Non-Toxic

Probability: 0.494

Enrichment: 0.94

Bayesian Score: -1.46

Mahalanobis Distance: 9.07

Mahalanobis Distance p-value: 0.158

Prediction: Positive if the Bayesian score is above the estimated best cutoff value from minimizing the false positive and false negative rate.

Probability: The estimated probability that the sample is in the positive category. This assumes that the Bayesian score follows a normal distribution and is different from the prediction using a cutoff.

Enrichment: An estimate of enrichment, that is, the increased likelihood (versus random) of this sample being in the category.

Bayesian Score: The standard Laplacian-modified Bayesian score.

Mahalanobis Distance: The Mahalanobis distance (MD) is the distance to the center of the training data. The larger the MD, the less trustworthy the prediction.

Mahalanobis Distance p-value: The p-value gives the fraction of training data with an MD greater than or equal to the one for the given sample, assuming normally distributed data. The smaller the p-value, the less trustworthy the prediction. For highly non-normal X properties (e.g., fingerprints), the MD p-value is wildly inaccurate.

## Structural Similar Compounds

| Name               | Guanabenz                                  | Caffeic Acid                              | Bropiramine                 |
|--------------------|--------------------------------------------|-------------------------------------------|-----------------------------|
| Structure          |                                            |                                           |                             |
| Actual Endpoint    | Toxic                                      | Toxic                                     | Non-Toxic                   |
| Predicted Endpoint | Toxic                                      | Toxic                                     | Non-Toxic                   |
| Distance           | 0.600                                      | 0.624                                     | 0.661                       |
| Reference          | Journal of Toxic Sciences 11:107-119; 1982 | Toxicol Appl Pharmacol 36(2):227-37; 1976 | Teratology 38(1):7-14; 1988 |

## Model Applicability

Unknown features are fingerprint features in the query molecule, but not found or appearing too infrequently in the training set.

1. All properties and OPS components are within expected ranges.

## Feature Contribution

### Top features for positive contribution

| Fingerprint | Bit/Smiles  | Feature Structure          | Score | Toxic in training set |
|-------------|-------------|----------------------------|-------|-----------------------|
| SCFP_6      | -1357949052 | <br><chem>[*]C(=O)N</chem> | 0.453 | 8 out of 9            |

|                                        |             |                                                                                                                                          |        |                       |
|----------------------------------------|-------------|------------------------------------------------------------------------------------------------------------------------------------------|--------|-----------------------|
| SCFP_6                                 | -1378360678 | 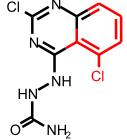<br><chem>*:[c]1:[*]:[cH]:[cH]:[cH]:[c]:1Cl</chem>    | 0.137  | 17 out of 28          |
| SCFP_6                                 | 1256786467  | <br><chem>[*]NC(=O)N</chem>                           | 0.12   | 9 out of 15           |
| Top Features for negative contribution |             |                                                                                                                                          |        |                       |
| Fingerprint                            | Bit/Smiles  | Feature Structure                                                                                                                        | Score  | Toxic in training set |
| SCFP_6                                 | -1286592310 | <br><chem>[*]:n:[c](Cl):n:[*]</chem>                  | -0.422 | 0 out of 1            |
| SCFP_6                                 | 60071962    | <br><chem>[*][c]1:[*]:[c](:[*]):n:[c](Cl):n:1</chem> | -0.422 | 0 out of 1            |
| SCFP_6                                 | -1379591900 | <br><chem>[*]:[c]1:[*]:[cH]:[cH]:[cH]:[cH]:1</chem> | -0.282 | 33 out of 84          |

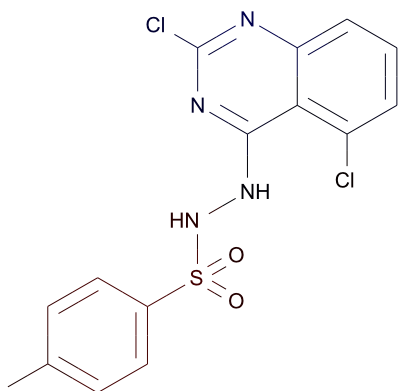

$C_{15}H_{12}Cl_2N_4O_2S$

Molecular Weight: 383.25237

ALogP: 4.443

Rotatable Bonds: 4

Acceptors: 5

Donors: 2

## Model Prediction

Prediction: Non-Toxic

Probability: 0.525

Enrichment: 0.998

Bayesian Score: -0.61

Mahalanobis Distance: 11.8

Mahalanobis Distance p-value: 6.09e-005

Prediction: Positive if the Bayesian score is above the estimated best cutoff value from minimizing the false positive and false negative rate.

Probability: The estimated probability that the sample is in the positive category. This assumes that the Bayesian score follows a normal distribution and is different from the prediction using a cutoff.

Enrichment: An estimate of enrichment, that is, the increased likelihood (versus random) of this sample being in the category.

Bayesian Score: The standard Laplacian-modified Bayesian score.

Mahalanobis Distance: The Mahalanobis distance (MD) is the distance to the center of the training data. The larger the MD, the less trustworthy the prediction.

Mahalanobis Distance p-value: The p-value gives the fraction of training data with an MD greater than or equal to the one for the given sample, assuming normally distributed data. The smaller the p-value, the less trustworthy the prediction. For highly non-normal X properties (e.g., fingerprints), the MD p-value is wildly inaccurate.

## Structural Similar Compounds

| Name               | Amsacrine                             | Ochratoxin a                             | Benomyl                                   |
|--------------------|---------------------------------------|------------------------------------------|-------------------------------------------|
| Structure          |                                       |                                          |                                           |
| Actual Endpoint    | Toxic                                 | Toxic                                    | Toxic                                     |
| Predicted Endpoint | Toxic                                 | Toxic                                    | Toxic                                     |
| Distance           | 0.515                                 | 0.642                                    | 0.651                                     |
| Reference          | Fundam Appl Toxicol 7(2):214-20; 1986 | Toxicol Appl Pharmacol 37(2):331-8; 1976 | J Toxicol Environ Health 17:405-417; 1986 |

## Model Applicability

Unknown features are fingerprint features in the query molecule, but not found or appearing too infrequently in the training set.

1. All properties and OPS components are within expected ranges.

## Feature Contribution

### Top features for positive contribution

| Fingerprint | Bit/Smiles | Feature Structure                                                  | Score | Toxic in training set |
|-------------|------------|--------------------------------------------------------------------|-------|-----------------------|
| SCFP_6      | 2054891299 | <br><chem>[*]S(=[*])(=[*])[c]1:[cH]:[cH]:[c](C):[cH]:[cH]:1</chem> | 0.271 | 1 out of 1            |

|                                        |             |                                                                                                                                                             |        |                       |
|----------------------------------------|-------------|-------------------------------------------------------------------------------------------------------------------------------------------------------------|--------|-----------------------|
| SCFP_6                                 | 1892882306  | 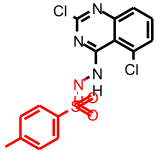<br><chem>[*]NS(=O)(=O)[c]1:[cH]         :[cH]:[c](C):[cH]:[cH]:1</chem> | 0.271  | 1 out of 1            |
| SCFP_6                                 | -1247518081 | <br><chem>[*]NS(=O)(=O)[c]1:[cH]         :[cH]:[*]:[cH]:[cH]:1</chem>    | 0.271  | 1 out of 1            |
| Top Features for negative contribution |             |                                                                                                                                                             |        |                       |
| Fingerprint                            | Bit/Smiles  | Feature Structure                                                                                                                                           | Score  | Toxic in training set |
| SCFP_6                                 | 60071962    | <br><chem>[*][c]1:[*]:[c](:[*])         :n:[c](Cl):n:1</chem>            | -0.422 | 0 out of 1            |
| SCFP_6                                 | -1286592310 | <br><chem>[*]:n:[c](Cl):n:[*]</chem>                                    | -0.422 | 0 out of 1            |
| SCFP_6                                 | 136686699   | <br><chem>[*]:[c](:[*])C</chem>                                        | -0.316 | 7 out of 19           |

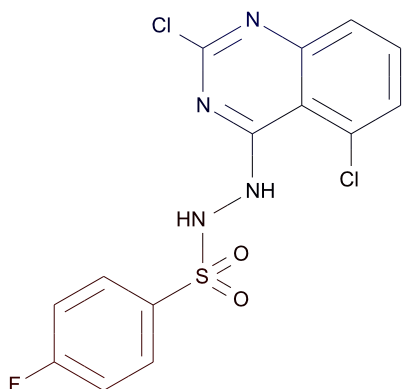

$C_{14}H_9Cl_2FN_4O_2S$

Molecular Weight: 387.21626

ALogP: 4.162

Rotatable Bonds: 4

Acceptors: 5

Donors: 2

## Model Prediction

**Prediction: Toxic**

Probability: 0.545

Enrichment: 1.04

Bayesian Score: -0.06

Mahalanobis Distance: 12.1

Mahalanobis Distance p-value: 2.32e-005

Prediction: Positive if the Bayesian score is above the estimated best cutoff value from minimizing the false positive and false negative rate.

Probability: The estimated probability that the sample is in the positive category. This assumes that the Bayesian score follows a normal distribution and is different from the prediction using a cutoff.

Enrichment: An estimate of enrichment, that is, the increased likelihood (versus random) of this sample being in the category.

Bayesian Score: The standard Laplacian-modified Bayesian score.

Mahalanobis Distance: The Mahalanobis distance (MD) is the distance to the center of the training data. The larger the MD, the less trustworthy the prediction.

Mahalanobis Distance p-value: The p-value gives the fraction of training data with an MD greater than or equal to the one for the given sample, assuming normally distributed data. The smaller the p-value, the less trustworthy the prediction. For highly non-normal X properties (e.g., fingerprints), the MD p-value is wildly inaccurate.

## Structural Similar Compounds

| Name               | Amsacrine                             | Ochratoxin a                             | Benomyl                                   |
|--------------------|---------------------------------------|------------------------------------------|-------------------------------------------|
| Structure          |                                       |                                          |                                           |
| Actual Endpoint    | Toxic                                 | Toxic                                    | Toxic                                     |
| Predicted Endpoint | Toxic                                 | Toxic                                    | Toxic                                     |
| Distance           | 0.515                                 | 0.641                                    | 0.644                                     |
| Reference          | Fundam Appl Toxicol 7(2):214-20; 1986 | Toxicol Appl Pharmacol 37(2):331-8; 1976 | J Toxicol Environ Health 17:405-417; 1986 |

## Model Applicability

Unknown features are fingerprint features in the query molecule, but not found or appearing too infrequently in the training set.

1. All properties and OPS components are within expected ranges.

## Feature Contribution

### Top features for positive contribution

| Fingerprint | Bit/Smiles | Feature Structure                      | Score | Toxic in training set |
|-------------|------------|----------------------------------------|-------|-----------------------|
| SCFP_6      | -783770208 | <p>F[c]1:[cH]:[cH]:[*]:[cH]:[cH]:1</p> | 0.322 | 4 out of 5            |

|                                        |             |                                                                                                                                                                   |        |                       |
|----------------------------------------|-------------|-------------------------------------------------------------------------------------------------------------------------------------------------------------------|--------|-----------------------|
| SCFP_6                                 | -1247518081 | 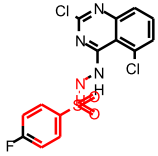<br><chem>[*]NS(=O)(=O)[c]1:[cH]         :[cH]:[*]:[cH]:[cH]         :1</chem> | 0.271  | 1 out of 1            |
| SCFP_6                                 | -1380395165 | <br><chem>[*][c]1:[*]:[cH]:[c]([cH]:[cH]:1)S(=[*])         (=[*])[*]</chem>    | 0.255  | 3 out of 4            |
| Top Features for negative contribution |             |                                                                                                                                                                   |        |                       |
| Fingerprint                            | Bit/Smiles  | Feature Structure                                                                                                                                                 | Score  | Toxic in training set |
| SCFP_6                                 | 60071962    | <br><chem>[*][c]1:[*]:[c]([*])         :n:[c](Cl):n:1</chem>                   | -0.422 | 0 out of 1            |
| SCFP_6                                 | -1286592310 | <br><chem>[*]:n:[c](Cl):n:[*]</chem>                                          | -0.422 | 0 out of 1            |
| SCFP_6                                 | -1379591900 | <br><chem>[*]:[c]1:[*]:[cH]:[cH]         ]:[cH]:[cH]:1</chem>                | -0.282 | 33 out of 84          |

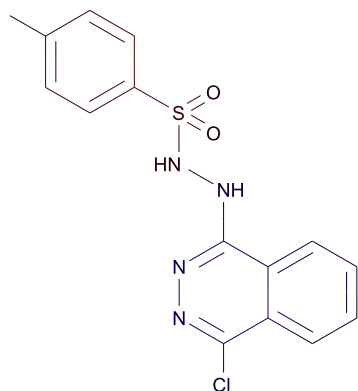

$C_{15}H_{13}ClN_4O_2S$

Molecular Weight: 348.80731

ALogP: 3.529

Rotatable Bonds: 4

Acceptors: 5

Donors: 2

## Model Prediction

Prediction: Non-Toxic

Probability: 0.456

Enrichment: 0.867

Bayesian Score: -2.59

Mahalanobis Distance: 15.9

Mahalanobis Distance p-value: 2.43e-013

Prediction: Positive if the Bayesian score is above the estimated best cutoff value from minimizing the false positive and false negative rate.

Probability: The estimated probability that the sample is in the positive category. This assumes that the Bayesian score follows a normal distribution and is different from the prediction using a cutoff.

Enrichment: An estimate of enrichment, that is, the increased likelihood (versus random) of this sample being in the category.

Bayesian Score: The standard Laplacian-modified Bayesian score.

Mahalanobis Distance: The Mahalanobis distance (MD) is the distance to the center of the training data. The larger the MD, the less trustworthy the prediction.

Mahalanobis Distance p-value: The p-value gives the fraction of training data with an MD greater than or equal to the one for the given sample, assuming normally distributed data. The smaller the p-value, the less trustworthy the prediction. For highly non-normal X properties (e.g., fingerprints), the MD p-value is wildly inaccurate.

## Structural Similar Compounds

| Name               | Amsacrine                             | Sulfonylurea Gliclazide            | Benomyl                                   |
|--------------------|---------------------------------------|------------------------------------|-------------------------------------------|
| Structure          |                                       |                                    |                                           |
| Actual Endpoint    | Toxic                                 | Toxic                              | Toxic                                     |
| Predicted Endpoint | Toxic                                 | Toxic                              | Toxic                                     |
| Distance           | 0.547                                 | 0.565                              | 0.594                                     |
| Reference          | Fundam Appl Toxicol 7(2):214-20; 1986 | Yakuri to Chiryo 9:3551-3571; 1981 | J Toxicol Environ Health 17:405-417; 1986 |

## Model Applicability

Unknown features are fingerprint features in the query molecule, but not found or appearing too infrequently in the training set.

1. All properties and OPS components are within expected ranges.

## Feature Contribution

### Top features for positive contribution

| Fingerprint | Bit/Smiles | Feature Structure                                      | Score | Toxic in training set |
|-------------|------------|--------------------------------------------------------|-------|-----------------------|
| SCFP_6      | 1892882306 | <p>[*]NS(=O)(=O)[c]1:[cH] :[cH]:[c](C):[cH]:[cH]:1</p> | 0.271 | 1 out of 1            |

|                                        |            |                                                                                                                                                             |        |                       |
|----------------------------------------|------------|-------------------------------------------------------------------------------------------------------------------------------------------------------------|--------|-----------------------|
| SCFP_6                                 | 2054891299 | 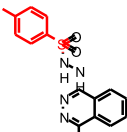<br>[*]S(=[*])(=[*])[c]1:<br>[cH]:[cH]:[c](Cl):[cH]<br>]:[cH]:1          | 0.271  | 1 out of 1            |
| SCFP_6                                 | 795925860  | <br>[*][c]1:[cH]:[cH]:[c]<br>(C):[cH]:[cH]:1                             | 0.271  | 1 out of 1            |
| Top Features for negative contribution |            |                                                                                                                                                             |        |                       |
| Fingerprint                            | Bit/Smiles | Feature Structure                                                                                                                                           | Score  | Toxic in training set |
| SCFP_6                                 | -601362767 | <br>[*]:n:[c](Cl):[c]([*]<br>]):[*]                                      | -0.945 | 0 out of 3            |
| SCFP_6                                 | 149212520  | <br>[*][c](:[*]):n:n[*]                                                 | -0.448 | 5 out of 16           |
| SCFP_6                                 | 2097816882 | <br>[*]N[c]1:n:[*]:[c]([*]<br>]):[c]2:[cH]:[cH]:[c]<br>H]:[cH]:[c]:1:2 | -0.422 | 0 out of 1            |

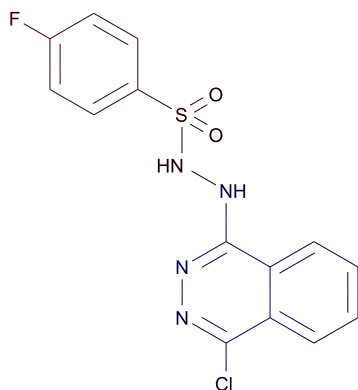

$C_{14}H_{10}ClFN_4O_2S$

Molecular Weight: 352.7712

ALogP: 3.248

Rotatable Bonds: 4

Acceptors: 5

Donors: 2

## Model Prediction

Prediction: Non-Toxic

Probability: 0.462

Enrichment: 0.879

Bayesian Score: -2.39

Mahalanobis Distance: 16

Mahalanobis Distance p-value: 1.37e-013

Prediction: Positive if the Bayesian score is above the estimated best cutoff value from minimizing the false positive and false negative rate.

Probability: The estimated probability that the sample is in the positive category. This assumes that the Bayesian score follows a normal distribution and is different from the prediction using a cutoff.

Enrichment: An estimate of enrichment, that is, the increased likelihood (versus random) of this sample being in the category.

Bayesian Score: The standard Laplacian-modified Bayesian score.

Mahalanobis Distance: The Mahalanobis distance (MD) is the distance to the center of the training data. The larger the MD, the less trustworthy the prediction.

Mahalanobis Distance p-value: The p-value gives the fraction of training data with an MD greater than or equal to the one for the given sample, assuming normally distributed data. The smaller the p-value, the less trustworthy the prediction. For highly non-normal X properties (e.g., fingerprints), the MD p-value is wildly inaccurate.

## Structural Similar Compounds

| Name               | Amsacrine                             | Benomyl                                   | Sulfonylurea Gliclazide            |
|--------------------|---------------------------------------|-------------------------------------------|------------------------------------|
| Structure          |                                       |                                           |                                    |
| Actual Endpoint    | Toxic                                 | Toxic                                     | Toxic                              |
| Predicted Endpoint | Toxic                                 | Toxic                                     | Toxic                              |
| Distance           | 0.568                                 | 0.598                                     | 0.602                              |
| Reference          | Fundam Appl Toxicol 7(2):214-20; 1986 | J Toxicol Environ Health 17:405-417; 1986 | Yakuri to Chiryo 9:3551-3571; 1981 |

## Model Applicability

Unknown features are fingerprint features in the query molecule, but not found or appearing too infrequently in the training set.

1. All properties and OPS components are within expected ranges.

## Feature Contribution

### Top features for positive contribution

| Fingerprint | Bit/Smiles | Feature Structure                                | Score | Toxic in training set |
|-------------|------------|--------------------------------------------------|-------|-----------------------|
| SCFP_6      | -783770208 | <br><chem>F[c]1:[cH]:[cH]:[*]:[cH]:[cH]:1</chem> | 0.322 | 4 out of 5            |

|                                        |             |                                                                                                                                                                  |        |                       |
|----------------------------------------|-------------|------------------------------------------------------------------------------------------------------------------------------------------------------------------|--------|-----------------------|
| SCFP_6                                 | -1247518081 | 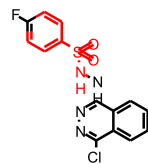<br><chem>[*]NS(=O)(=O)[c]1:[cH]         :[cH]:[*]:[cH]:[cH]         :1</chem> | 0.271  | 1 out of 1            |
| SCFP_6                                 | -1380395165 | <br><chem>[*][c]1:[*]:[cH]:[c]([cH]:[cH]:1)S(=[*])         (=[*])[*]</chem>   | 0.255  | 3 out of 4            |
| Top Features for negative contribution |             |                                                                                                                                                                  |        |                       |
| Fingerprint                            | Bit/Smiles  | Feature Structure                                                                                                                                                | Score  | Toxic in training set |
| SCFP_6                                 | -601362767  | <br><chem>[*]:n:[c](Cl):[c]([*]         ):[*]</chem>                          | -0.945 | 0 out of 3            |
| SCFP_6                                 | 149212520   | <br><chem>[*][c]([*]):n:n[*]</chem>                                          | -0.448 | 5 out of 16           |
| SCFP_6                                 | -705181820  | <br><chem>[*]N[c]1:n:n:[c]([*])         :[*]:[c]:1[*]</chem>                | -0.422 | 0 out of 1            |

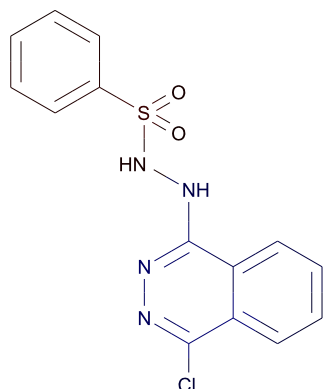

$C_{14}H_{11}ClN_4O_2S$

Molecular Weight: 334.78073

ALogP: 3.043

Rotatable Bonds: 4

Acceptors: 5

Donors: 2

## Model Prediction

Prediction: Non-Toxic

Probability: 0.426

Enrichment: 0.81

Bayesian Score: -3.52

Mahalanobis Distance: 15.7

Mahalanobis Distance p-value: 8.89e-013

Prediction: Positive if the Bayesian score is above the estimated best cutoff value from minimizing the false positive and false negative rate.

Probability: The estimated probability that the sample is in the positive category. This assumes that the Bayesian score follows a normal distribution and is different from the prediction using a cutoff.

Enrichment: An estimate of enrichment, that is, the increased likelihood (versus random) of this sample being in the category.

Bayesian Score: The standard Laplacian-modified Bayesian score.

Mahalanobis Distance: The Mahalanobis distance (MD) is the distance to the center of the training data. The larger the MD, the less trustworthy the prediction.

Mahalanobis Distance p-value: The p-value gives the fraction of training data with an MD greater than or equal to the one for the given sample, assuming normally distributed data. The smaller the p-value, the less trustworthy the prediction. For highly non-normal X properties (e.g., fingerprints), the MD p-value is wildly inaccurate.

## Structural Similar Compounds

| Name               | Sulfonylurea Gliclazide            | Benomyl                                   | Amsacrine                             |
|--------------------|------------------------------------|-------------------------------------------|---------------------------------------|
| Structure          |                                    |                                           |                                       |
| Actual Endpoint    | Toxic                              | Toxic                                     | Toxic                                 |
| Predicted Endpoint | Toxic                              | Toxic                                     | Toxic                                 |
| Distance           | 0.584                              | 0.586                                     | 0.592                                 |
| Reference          | Yakuri to Chiryo 9:3551-3571; 1981 | J Toxicol Environ Health 17:405-417; 1986 | Fundam Appl Toxicol 7(2):214-20; 1986 |

## Model Applicability

Unknown features are fingerprint features in the query molecule, but not found or appearing too infrequently in the training set.

1. All properties and OPS components are within expected ranges.

## Feature Contribution

### Top features for positive contribution

| Fingerprint | Bit/Smiles | Feature Structure                                                | Score | Toxic in training set |
|-------------|------------|------------------------------------------------------------------|-------|-----------------------|
| SCFP_6      | 1655803608 | <p>[*]S(=[*])(=[*])[c]1:<br/>[cH]:[cH]:[cH]:[cH]:<br/>[cH]:1</p> | 0.271 | 1 out of 1            |

|                                        |             |                                                                                                                                                                   |        |                       |
|----------------------------------------|-------------|-------------------------------------------------------------------------------------------------------------------------------------------------------------------|--------|-----------------------|
| SCFP_6                                 | -1247518081 | 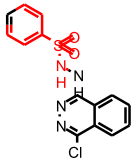<br><chem>[*]NS(=O)(=O)[c]1:[cH]         :[cH]:[*]:[cH]:[cH]         :1</chem> | 0.271  | 1 out of 1            |
| SCFP_6                                 | -1380395165 | <br><chem>[*][c]1:[*]:[cH]:[c]([cH]:[cH]:1)S(=[*])(=[*])[*]</chem>             | 0.255  | 3 out of 4            |
| Top Features for negative contribution |             |                                                                                                                                                                   |        |                       |
| Fingerprint                            | Bit/Smiles  | Feature Structure                                                                                                                                                 | Score  | Toxic in training set |
| SCFP_6                                 | -601362767  | <br><chem>[*]:n:[c](Cl):[c]([*]):[*]</chem>                                    | -0.945 | 0 out of 3            |
| SCFP_6                                 | 149212520   | <br><chem>[*][c]([*]):n:n:[*]</chem>                                          | -0.448 | 5 out of 16           |
| SCFP_6                                 | -705181820  | <br><chem>[*]N[c]1:n:n:[c]([*]):[*]:[c]:1:[*]</chem>                         | -0.422 | 0 out of 1            |

# Thalidomide

# TOPKAT\_Developmental\_Toxicity\_Potential

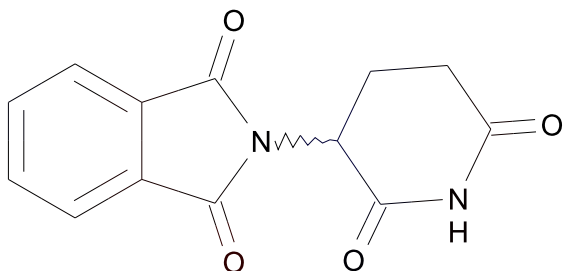

C<sub>13</sub>H<sub>10</sub>N<sub>2</sub>O<sub>4</sub>

Molecular Weight: 258.22949

ALogP: 9.7e-002

Rotatable Bonds: 1

Acceptors: 4

Donors: 1

## Model Prediction

Prediction: Non-Toxic

Probability: 0.536

Enrichment: 1.02

Bayesian Score: -0.317

Mahalanobis Distance: 7.73

Mahalanobis Distance p-value: 0.731

Prediction: Positive if the Bayesian score is above the estimated best cutoff value from minimizing the false positive and false negative rate.

Probability: The estimated probability that the sample is in the positive category. This assumes that the Bayesian score follows a normal distribution and is different from the prediction using a cutoff.

Enrichment: An estimate of enrichment, that is, the increased likelihood (versus random) of this sample being in the category.

Bayesian Score: The standard Laplacian-modified Bayesian score.

Mahalanobis Distance: The Mahalanobis distance (MD) is the distance to the center of the training data. The larger the MD, the less trustworthy the prediction.

Mahalanobis Distance p-value: The p-value gives the fraction of training data with an MD greater than or equal to the one for the given sample, assuming normally distributed data. The smaller the p-value, the less trustworthy the prediction. For highly non-normal X properties (e.g., fingerprints), the MD p-value is wildly inaccurate.

## Structural Similar Compounds

| Name               | 11-oxo-11H-Pyrido(2;1-b)quinazoline-2-carboxylic Acid | Theobromine                          | Bropirime                   |
|--------------------|-------------------------------------------------------|--------------------------------------|-----------------------------|
| Structure          |                                                       |                                      |                             |
| Actual Endpoint    | Toxic                                                 | Toxic                                | Non-Toxic                   |
| Predicted Endpoint | Toxic                                                 | Toxic                                | Non-Toxic                   |
| Distance           | 0.539                                                 | 0.577                                | 0.598                       |
| Reference          | Teratology 38(4):351-67; 1988                         | Food Chem Toxicol 24(5):375-82; 1986 | Teratology 38(1):7-14; 1988 |

## Model Applicability

Unknown features are fingerprint features in the query molecule, but not found or appearing too infrequently in the training set.

1. All properties and OPS components are within expected ranges.

## Feature Contribution

| Top features for positive contribution |            |                                         |       |                       |
|----------------------------------------|------------|-----------------------------------------|-------|-----------------------|
| Fingerprint                            | Bit/Smiles | Feature Structure                       | Score | Toxic in training set |
| SCFP_6                                 | 1257084377 | <br><chem>[*]N1[*]:[c](:[*])C1=O</chem> | 0.362 | 14 out of 18          |

|                                        |             |                                                                                                                                                    |        |                       |
|----------------------------------------|-------------|----------------------------------------------------------------------------------------------------------------------------------------------------|--------|-----------------------|
| SCFP_6                                 | 1725056539  | 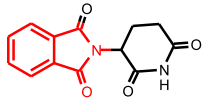<br><chem>[*]N1C(=[*])[c]2:[cH]:[cH]:[cH]:[cH]:[c]:2C1=O</chem> | 0.271  | 1 out of 1            |
| SCFP_6                                 | 2049973914  | <br><chem>[*]N1C(=[*])[c]2:[cH]:[*]:[cH]:[cH]:[c]:2C1=O</chem>  | 0.271  | 1 out of 1            |
| Top Features for negative contribution |             |                                                                                                                                                    |        |                       |
| Fingerprint                            | Bit/Smiles  | Feature Structure                                                                                                                                  | Score  | Toxic in training set |
| SCFP_6                                 | 399659969   | <br><chem>[*]C([*])N1C(=[*])[*]:[*]C1=[*]</chem>                | -0.526 | 3 out of 11           |
| SCFP_6                                 | -1946889102 | <br><chem>[*]CC(N([*])[*])C(=[*])[*]</chem>                   | -0.512 | 4 out of 14           |
| SCFP_6                                 | -1379591900 | <br><chem>[*]:[c]1:[*]:[cH]:[cH]:[cH]:[cH]:1</chem>           | -0.282 | 33 out of 84          |

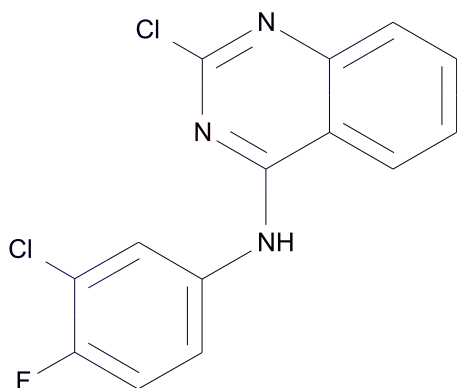

$C_{14}H_8Cl_2FN_3$

Molecular Weight: 308.13782

ALogP: 5.202

Rotatable Bonds: 2

Acceptors: 3

Donors: 1

## Model Prediction

Prediction: Non-Carcinogen

Probability: 0.227

Enrichment: 0.707

Bayesian Score: -2.35

Mahalanobis Distance: 9.9

Mahalanobis Distance p-value: 0.491

Prediction: Positive if the Bayesian score is above the estimated best cutoff value from minimizing the false positive and false negative rate.

Probability: The estimated probability that the sample is in the positive category. This assumes that the Bayesian score follows a normal distribution and is different from the prediction using a cutoff.

Enrichment: An estimate of enrichment, that is, the increased likelihood (versus random) of this sample being in the category.

Bayesian Score: The standard Laplacian-modified Bayesian score.

Mahalanobis Distance: The Mahalanobis distance (MD) is the distance to the center of the training data. The larger the MD, the less trustworthy the prediction.

Mahalanobis Distance p-value: The p-value gives the fraction of training data with an MD greater than or equal to the one for the given sample, assuming normally distributed data. The smaller the p-value, the less trustworthy the prediction. For highly non-normal X properties (e.g., fingerprints), the MD p-value is wildly inaccurate.

## Structural Similar Compounds

| Name               | Nafenopin                                                           | Mestranol                                                           | Levonorgestrel                                                      |
|--------------------|---------------------------------------------------------------------|---------------------------------------------------------------------|---------------------------------------------------------------------|
| Structure          |                                                                     |                                                                     |                                                                     |
| Actual Endpoint    | Carcinogen                                                          | Carcinogen                                                          | Carcinogen                                                          |
| Predicted Endpoint | Carcinogen                                                          | Carcinogen                                                          | Carcinogen                                                          |
| Distance           | 0.602                                                               | 0.603                                                               | 0.606                                                               |
| Reference          | US FDA (Centre for Drug Eval.& Res./Off. Testing & Res.) Sept. 1997 | US FDA (Centre for Drug Eval.& Res./Off. Testing & Res.) Sept. 1997 | US FDA (Centre for Drug Eval.& Res./Off. Testing & Res.) Sept. 1997 |

## Model Applicability

Unknown features are fingerprint features in the query molecule, but not found or appearing too infrequently in the training set.

1. All properties and OPS components are within expected ranges.
2. Unknown ECFP\_2 feature: 1126732433: [\*]:n:[c](Cl):n:[\*]

## Feature Contribution

### Top features for positive contribution

| Fingerprint | Bit/Smiles | Feature Structure                              | Score | Carcinogen in training set |
|-------------|------------|------------------------------------------------|-------|----------------------------|
| ECFP_6      | 1049768340 | <br><chem>[*]N[c](:n:[*]):[c](:[*]):[*]</chem> | 0.424 | 1 out of 1                 |

| ECFP_6                                 | -177077903  | 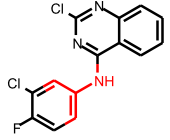<br><chem>[*]N[c](:[cH]:[*]):[cH]:[*]</chem>            | 0.279  | 4 out of 9                 |
|----------------------------------------|-------------|--------------------------------------------------------------------------------------------------------------------------------------------|--------|----------------------------|
| ECFP_6                                 | 888054369   | <br><chem>[*]N[c]1:[cH]:[*]:[c]([*]):[cH]:[cH]:1</chem> | 0.234  | 3 out of 7                 |
| Top Features for negative contribution |             |                                                                                                                                            |        |                            |
| Fingerprint                            | Bit/Smiles  | Feature Structure                                                                                                                          | Score  | Carcinogen in training set |
| ECFP_6                                 | 1335691903  | <br><chem>[*][c](:[*]):[c](Cl):[cH]:[*]</chem>          | -0.669 | 3 out of 22                |
| ECFP_6                                 | -1242906247 | <br><chem>[*]:[c](:[*])N[c](:[*]):[*]</chem>           | -0.482 | 0 out of 2                 |
| ECFP_6                                 | 99947387    | <br><chem>[*]:[c](:[*])Cl</chem>                      | -0.461 | 9 out of 48                |

7a

## TOPKAT\_Mouse\_Female\_FDA\_None\_vs\_Carcinogen

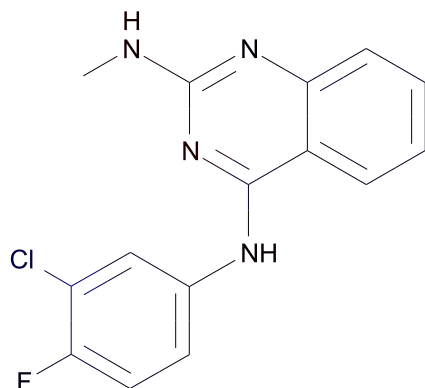C<sub>15</sub>H<sub>12</sub>ClFN<sub>4</sub>

Molecular Weight: 302.73398

ALogP: 4.677

Rotatable Bonds: 3

Acceptors: 4

Donors: 2

**Model Prediction**

Prediction: Non-Carcinogen

Probability: 0.228

Enrichment: 0.712

Bayesian Score: -2.2

Mahalanobis Distance: 10.3

Mahalanobis Distance p-value: 0.302

Prediction: Positive if the Bayesian score is above the estimated best cutoff value from minimizing the false positive and false negative rate.

Probability: The estimated probability that the sample is in the positive category. This assumes that the Bayesian score follows a normal distribution and is different from the prediction using a cutoff.

Enrichment: An estimate of enrichment, that is, the increased likelihood (versus random) of this sample being in the category.

Bayesian Score: The standard Laplacian-modified Bayesian score.

Mahalanobis Distance: The Mahalanobis distance (MD) is the distance to the center of the training data. The larger the MD, the less trustworthy the prediction.

Mahalanobis Distance p-value: The p-value gives the fraction of training data with an MD greater than or equal to the one for the given sample, assuming normally distributed data. The smaller the p-value, the less trustworthy the prediction. For highly non-normal X properties (e.g., fingerprints), the MD p-value is wildly inaccurate.

**Structural Similar Compounds**

| Name               | Diclofenac                                                          | Phenolphthalein                                                     | Etodolac                                                            |
|--------------------|---------------------------------------------------------------------|---------------------------------------------------------------------|---------------------------------------------------------------------|
| Structure          |                                                                     |                                                                     |                                                                     |
| Actual Endpoint    | Non-Carcinogen                                                      | Carcinogen                                                          | Non-Carcinogen                                                      |
| Predicted Endpoint | Non-Carcinogen                                                      | Carcinogen                                                          | Non-Carcinogen                                                      |
| Distance           | 0.553                                                               | 0.588                                                               | 0.613                                                               |
| Reference          | US FDA (Centre for Drug Eval.& Res./Off. Testing & Res.) Sept. 1997 | US FDA (Centre for Drug Eval.& Res./Off. Testing & Res.) Sept. 1997 | US FDA (Centre for Drug Eval.& Res./Off. Testing & Res.) Sept. 1997 |

**Model Applicability**

Unknown features are fingerprint features in the query molecule, but not found or appearing too infrequently in the training set.

1. All properties and OPS components are within expected ranges.
2. Unknown ECFP\_2 feature: -1240852525: [\*]:[c](:[\*])NC

**Feature Contribution****Top features for positive contribution**

| Fingerprint | Bit/Smiles | Feature Structure                 | Score | Carcinogen in training set |
|-------------|------------|-----------------------------------|-------|----------------------------|
| ECFP_6      | 1049768340 | <br>[*]N[c](:n:[*]):[c](:[*]):[*] | 0.424 | 1 out of 1                 |

| ECFP_6                                 | -177077903  | 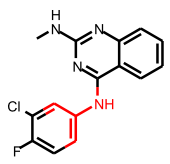<br><chem>[*]N[c](:[cH]:[*]):[cH]:[*]</chem>            | 0.279  | 4 out of 9                 |
|----------------------------------------|-------------|--------------------------------------------------------------------------------------------------------------------------------------------|--------|----------------------------|
| ECFP_6                                 | 888054369   | <br><chem>[*]N[c]1:[cH]:[*]:[c]([*]):[cH]:[cH]:1</chem> | 0.234  | 3 out of 7                 |
| Top Features for negative contribution |             |                                                                                                                                            |        |                            |
| Fingerprint                            | Bit/Smiles  | Feature Structure                                                                                                                          | Score  | Carcinogen in training set |
| ECFP_6                                 | 1335691903  | <br><chem>[*][c](:[*]):[c](Cl):[cH]:[*]</chem>          | -0.669 | 3 out of 22                |
| ECFP_6                                 | -1242906247 | <br><chem>[*]:[c](:[*])N[c](:[*]):[*]</chem>           | -0.482 | 0 out of 2                 |
| ECFP_6                                 | 99947387    | <br><chem>[*]:[c](:[*])Cl</chem>                      | -0.461 | 9 out of 48                |

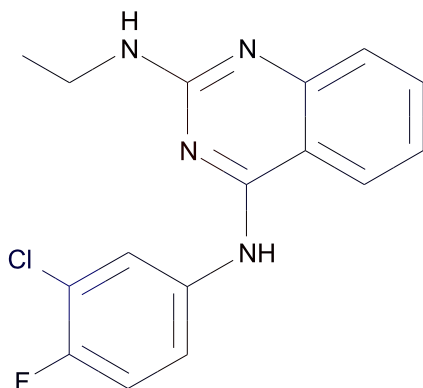

$C_{16}H_{14}ClFN_4$

Molecular Weight: 316.76056

ALogP: 5.025

Rotatable Bonds: 4

Acceptors: 4

Donors: 2

## Model Prediction

Prediction: Non-Carcinogen

Probability: 0.221

Enrichment: 0.691

Bayesian Score: -2.84

Mahalanobis Distance: 10.9

Mahalanobis Distance p-value: 0.12

Prediction: Positive if the Bayesian score is above the estimated best cutoff value from minimizing the false positive and false negative rate.

Probability: The estimated probability that the sample is in the positive category. This assumes that the Bayesian score follows a normal distribution and is different from the prediction using a cutoff.

Enrichment: An estimate of enrichment, that is, the increased likelihood (versus random) of this sample being in the category.

Bayesian Score: The standard Laplacian-modified Bayesian score.

Mahalanobis Distance: The Mahalanobis distance (MD) is the distance to the center of the training data. The larger the MD, the less trustworthy the prediction.

Mahalanobis Distance p-value: The p-value gives the fraction of training data with an MD greater than or equal to the one for the given sample, assuming normally distributed data. The smaller the p-value, the less trustworthy the prediction. For highly non-normal X properties (e.g., fingerprints), the MD p-value is wildly inaccurate.

## Structural Similar Compounds

| Name               | Diclofenac                                                          | Mefloquine                                                          | Etodolac                                                            |
|--------------------|---------------------------------------------------------------------|---------------------------------------------------------------------|---------------------------------------------------------------------|
| Structure          |                                                                     |                                                                     |                                                                     |
| Actual Endpoint    | Non-Carcinogen                                                      | Non-Carcinogen                                                      | Non-Carcinogen                                                      |
| Predicted Endpoint | Non-Carcinogen                                                      | Non-Carcinogen                                                      | Non-Carcinogen                                                      |
| Distance           | 0.552                                                               | 0.611                                                               | 0.624                                                               |
| Reference          | US FDA (Centre for Drug Eval.& Res./Off. Testing & Res.) Sept. 1997 | US FDA (Centre for Drug Eval.& Res./Off. Testing & Res.) Sept. 1997 | US FDA (Centre for Drug Eval.& Res./Off. Testing & Res.) Sept. 1997 |

## Model Applicability

Unknown features are fingerprint features in the query molecule, but not found or appearing too infrequently in the training set.

1. OPS PC25 out of range. Value: -3.1285. Training min, max, SD, explained variance: -2.879, 2.6681, 1.105, 0.0124.

## Feature Contribution

| Top features for positive contribution |            |                        |       |                            |
|----------------------------------------|------------|------------------------|-------|----------------------------|
| Fingerprint                            | Bit/Smiles | Feature Structure      | Score | Carcinogen in training set |
| ECFP_6                                 | 491100606  | <br>[*]CN[c](:[*]):[*] | 0.424 | 1 out of 1                 |

| ECFP_6                                 | 1049768340  | 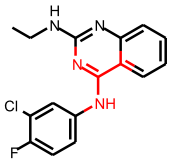<br><chem>[*]N[c](:n:[*]):[c](:[*]):[*]</chem> | 0.424  | 1 out of 1                 |
|----------------------------------------|-------------|-----------------------------------------------------------------------------------------------------------------------------------|--------|----------------------------|
| ECFP_6                                 | -177077903  | <br><chem>[*]N[c](:[cH]:[*]):[cH]:[*]</chem>   | 0.279  | 4 out of 9                 |
| Top Features for negative contribution |             |                                                                                                                                   |        |                            |
| Fingerprint                            | Bit/Smiles  | Feature Structure                                                                                                                 | Score  | Carcinogen in training set |
| ECFP_6                                 | 1335691903  | <br><chem>[*][c](:[*]):[c](Cl):[cH]:[*]</chem> | -0.669 | 3 out of 22                |
| ECFP_6                                 | -950223878  | <br><chem>[*]NCC</chem>                       | -0.482 | 0 out of 2                 |
| ECFP_6                                 | -1242906247 | <br><chem>[*]:[c](:[*])N[c](:[*]):[*]</chem> | -0.482 | 0 out of 2                 |

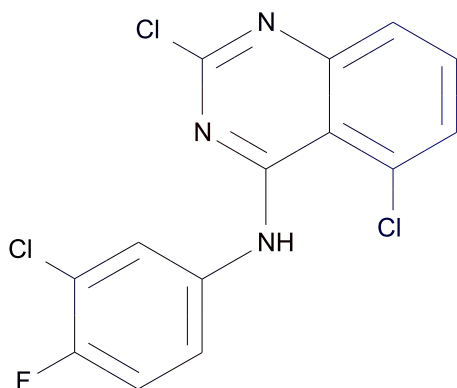

$C_{14}H_7Cl_3FN_3$

Molecular Weight: 342.58288

ALogP: 5.867

Rotatable Bonds: 2

Acceptors: 3

Donors: 1

## Model Prediction

Prediction: Non-Carcinogen

Probability: 0.216

Enrichment: 0.673

Bayesian Score: -3.49

Mahalanobis Distance: 10.5

Mahalanobis Distance p-value: 0.245

Prediction: Positive if the Bayesian score is above the estimated best cutoff value from minimizing the false positive and false negative rate.

Probability: The estimated probability that the sample is in the positive category. This assumes that the Bayesian score follows a normal distribution and is different from the prediction using a cutoff.

Enrichment: An estimate of enrichment, that is, the increased likelihood (versus random) of this sample being in the category.

Bayesian Score: The standard Laplacian-modified Bayesian score.

Mahalanobis Distance: The Mahalanobis distance (MD) is the distance to the center of the training data. The larger the MD, the less trustworthy the prediction.

Mahalanobis Distance p-value: The p-value gives the fraction of training data with an MD greater than or equal to the one for the given sample, assuming normally distributed data. The smaller the p-value, the less trustworthy the prediction. For highly non-normal X properties (e.g., fingerprints), the MD p-value is wildly inaccurate.

## Structural Similar Compounds

| Name               | Mestranol                                                           | Quazepam                                                            | Loratidine                                                          |
|--------------------|---------------------------------------------------------------------|---------------------------------------------------------------------|---------------------------------------------------------------------|
| Structure          |                                                                     |                                                                     |                                                                     |
| Actual Endpoint    | Carcinogen                                                          | Non-Carcinogen                                                      | Non-Carcinogen                                                      |
| Predicted Endpoint | Carcinogen                                                          | Non-Carcinogen                                                      | Non-Carcinogen                                                      |
| Distance           | 0.631                                                               | 0.638                                                               | 0.643                                                               |
| Reference          | US FDA (Centre for Drug Eval.& Res./Off. Testing & Res.) Sept. 1997 | US FDA (Centre for Drug Eval.& Res./Off. Testing & Res.) Sept. 1997 | US FDA (Centre for Drug Eval.& Res./Off. Testing & Res.) Sept. 1997 |

## Model Applicability

Unknown features are fingerprint features in the query molecule, but not found or appearing too infrequently in the training set.

1. All properties and OPS components are within expected ranges.
2. Unknown ECFP\_2 feature: 1126732433: [\*]:n:[c](Cl):n:[\*]

## Feature Contribution

### Top features for positive contribution

| Fingerprint | Bit/Smiles  | Feature Structure                                 | Score | Carcinogen in training set |
|-------------|-------------|---------------------------------------------------|-------|----------------------------|
| ECFP_6      | -1661653144 | <br>[*][c](:[*]):[c](:[c]([*]):[*]):[c](:[*]):[*] | 0.442 | 2 out of 3                 |

| ECFP_6                                 | 1049768340 | 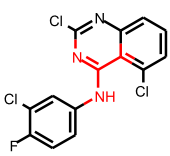<br><chem>[*]N[c](:n:[*]):[c](:[*]):[*]</chem>            | 0.424  | 1 out of 1                 |
|----------------------------------------|------------|----------------------------------------------------------------------------------------------------------------------------------------------|--------|----------------------------|
| ECFP_6                                 | -177077903 | <br><chem>[*]N[c](:[cH]:[*]):[cH]:[*]</chem>              | 0.279  | 4 out of 9                 |
| Top Features for negative contribution |            |                                                                                                                                              |        |                            |
| Fingerprint                            | Bit/Smiles | Feature Structure                                                                                                                            | Score  | Carcinogen in training set |
| ECFP_6                                 | 1641317964 | <br><chem>[*]:[c]1:[*]:[cH]:[cH]:[cH]:[c]:1Cl</chem>      | -0.789 | 1 out of 11                |
| ECFP_6                                 | 1335691903 | <br><chem>[*][c](:[*]):[c](Cl):[cH]:[*]</chem>           | -0.669 | 3 out of 22                |
| ECFP_6                                 | 2007300961 | <br><chem>[*][c]1:[*]:[c](:[*]):[cH]:[cH]:[cH]:1</chem> | -0.652 | 5 out of 34                |

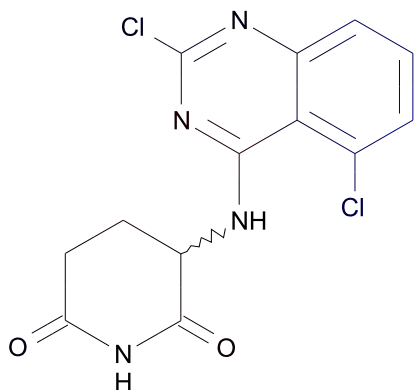

$C_{13}H_{10}Cl_2N_4O_2$

Molecular Weight: 325.15009

ALogP: 2.49

Rotatable Bonds: 2

Acceptors: 5

Donors: 2

## Model Prediction

Prediction: Non-Carcinogen

Probability: 0.227

Enrichment: 0.709

Bayesian Score: -2.28

Mahalanobis Distance: 11.9

Mahalanobis Distance p-value: 0.0156

Prediction: Positive if the Bayesian score is above the estimated best cutoff value from minimizing the false positive and false negative rate.

Probability: The estimated probability that the sample is in the positive category. This assumes that the Bayesian score follows a normal distribution and is different from the prediction using a cutoff.

Enrichment: An estimate of enrichment, that is, the increased likelihood (versus random) of this sample being in the category.

Bayesian Score: The standard Laplacian-modified Bayesian score.

Mahalanobis Distance: The Mahalanobis distance (MD) is the distance to the center of the training data. The larger the MD, the less trustworthy the prediction.

Mahalanobis Distance p-value: The p-value gives the fraction of training data with an MD greater than or equal to the one for the given sample, assuming normally distributed data. The smaller the p-value, the less trustworthy the prediction. For highly non-normal X properties (e.g., fingerprints), the MD p-value is wildly inaccurate.

## Structural Similar Compounds

| Name               | Metolazone                                                          | Indapamide                                                          | Naltrexone                                                          |
|--------------------|---------------------------------------------------------------------|---------------------------------------------------------------------|---------------------------------------------------------------------|
| Structure          |                                                                     |                                                                     |                                                                     |
| Actual Endpoint    | Non-Carcinogen                                                      | Non-Carcinogen                                                      | Non-Carcinogen                                                      |
| Predicted Endpoint | Non-Carcinogen                                                      | Non-Carcinogen                                                      | Non-Carcinogen                                                      |
| Distance           | 0.559                                                               | 0.578                                                               | 0.579                                                               |
| Reference          | US FDA (Centre for Drug Eval.& Res./Off. Testing & Res.) Sept. 1997 | US FDA (Centre for Drug Eval.& Res./Off. Testing & Res.) Sept. 1997 | US FDA (Centre for Drug Eval.& Res./Off. Testing & Res.) Sept. 1997 |

## Model Applicability

Unknown features are fingerprint features in the query molecule, but not found or appearing too infrequently in the training set.

1. All properties and OPS components are within expected ranges.
2. Unknown ECFP\_2 feature: 1126732433: [\*]:n:[c](Cl):n:[\*]

## Feature Contribution

### Top features for positive contribution

| Fingerprint | Bit/Smiles | Feature Structure   | Score | Carcinogen in training set |
|-------------|------------|---------------------|-------|----------------------------|
| ECFP_6      | 51876938   | <br>[*]CCC(=[*])[*] | 0.473 | 16 out of 31               |

| ECFP_6                                 | -1661653144 | 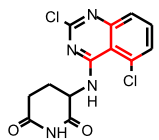<br><chem>[*][c](:[*]):[c](:[c]([*]):[*]):[c](:[*]):[*]</chem> | 0.442  | 2 out of 3                 |
|----------------------------------------|-------------|---------------------------------------------------------------------------------------------------------------------------------------------------|--------|----------------------------|
| ECFP_6                                 | 1049768340  | <br><chem>[*]N[c](:n:[*]):[c](:[*]):[*]</chem>                 | 0.424  | 1 out of 1                 |
| Top Features for negative contribution |             |                                                                                                                                                   |        |                            |
| Fingerprint                            | Bit/Smiles  | Feature Structure                                                                                                                                 | Score  | Carcinogen in training set |
| ECFP_6                                 | 1641317964  | <br><chem>[*]:[c]1:[*]:[cH]:[cH]:[cH]:[c]:1Cl</chem>           | -0.789 | 1 out of 11                |
| ECFP_6                                 | 1335691903  | <br><chem>[*][c](:[*]):[c](Cl):[cH]:[*]</chem>                | -0.669 | 3 out of 22                |
| ECFP_6                                 | 2007300961  | <br><chem>[*][c]1:[*]:[c](:[*]):[cH]:[cH]:[cH]:1</chem>      | -0.652 | 5 out of 34                |

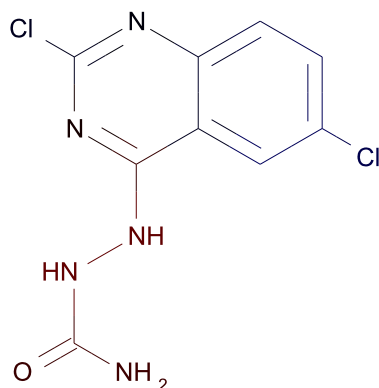

$C_9H_7Cl_2N_5O$

Molecular Weight: 272.09078

ALogP: 2.379

Rotatable Bonds: 2

Acceptors: 4

Donors: 3

## Model Prediction

Prediction: Non-Carcinogen

Probability: 0.238

Enrichment: 0.744

Bayesian Score: -1.43

Mahalanobis Distance: 10.1

Mahalanobis Distance p-value: 0.392

Prediction: Positive if the Bayesian score is above the estimated best cutoff value from minimizing the false positive and false negative rate.

Probability: The estimated probability that the sample is in the positive category. This assumes that the Bayesian score follows a normal distribution and is different from the prediction using a cutoff.

Enrichment: An estimate of enrichment, that is, the increased likelihood (versus random) of this sample being in the category.

Bayesian Score: The standard Laplacian-modified Bayesian score.

Mahalanobis Distance: The Mahalanobis distance (MD) is the distance to the center of the training data. The larger the MD, the less trustworthy the prediction.

Mahalanobis Distance p-value: The p-value gives the fraction of training data with an MD greater than or equal to the one for the given sample, assuming normally distributed data. The smaller the p-value, the less trustworthy the prediction. For highly non-normal X properties (e.g., fingerprints), the MD p-value is wildly inaccurate.

## Structural Similar Compounds

| Name               | Pyrimethamine                                                       | Guanfacine                                                          | Lamotrigine                                                         |
|--------------------|---------------------------------------------------------------------|---------------------------------------------------------------------|---------------------------------------------------------------------|
| Structure          |                                                                     |                                                                     |                                                                     |
| Actual Endpoint    | Non-Carcinogen                                                      | Non-Carcinogen                                                      | Non-Carcinogen                                                      |
| Predicted Endpoint | Non-Carcinogen                                                      | Non-Carcinogen                                                      | Non-Carcinogen                                                      |
| Distance           | 0.617                                                               | 0.620                                                               | 0.626                                                               |
| Reference          | US FDA (Centre for Drug Eval.& Res./Off. Testing & Res.) Sept. 1997 | US FDA (Centre for Drug Eval.& Res./Off. Testing & Res.) Sept. 1997 | US FDA (Centre for Drug Eval.& Res./Off. Testing & Res.) Sept. 1997 |

## Model Applicability

Unknown features are fingerprint features in the query molecule, but not found or appearing too infrequently in the training set.

1. All properties and OPS components are within expected ranges.
2. Unknown ECFP\_2 feature: 1126732433: [\*]:n:[c](Cl):n:[\*]

## Feature Contribution

### Top features for positive contribution

| Fingerprint | Bit/Smiles | Feature Structure           | Score | Carcinogen in training set |
|-------------|------------|-----------------------------|-------|----------------------------|
| ECFP_6      | 432952415  | <br><chem>[*]NC(=O)N</chem> | 0.442 | 2 out of 3                 |

|                                        |            |                                                                                                                                           |        |                            |
|----------------------------------------|------------|-------------------------------------------------------------------------------------------------------------------------------------------|--------|----------------------------|
| ECFP_6                                 | 1626972527 | 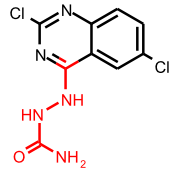<br><chem>[*]:[c](:[*])NNC(=O)N</chem>                 | 0.424  | 1 out of 1                 |
| ECFP_6                                 | -469184004 | <br><chem>[*]NNC(=O)N</chem>                           | 0.424  | 1 out of 1                 |
| Top Features for negative contribution |            |                                                                                                                                           |        |                            |
| Fingerprint                            | Bit/Smiles | Feature Structure                                                                                                                         | Score  | Carcinogen in training set |
| ECFP_6                                 | 577592657  | <br><chem>[*]:[c]1:[*]:[cH]:[cH]:[c](Cl):[cH]:1</chem> | -0.586 | 3 out of 20                |
| ECFP_6                                 | -176494269 | <br><chem>[*]:[cH]:[c](Cl):[cH]:[*]</chem>            | -0.476 | 5 out of 28                |
| ECFP_6                                 | 99947387   | <br><chem>[*]:[c](:[*])Cl</chem>                     | -0.461 | 9 out of 48                |

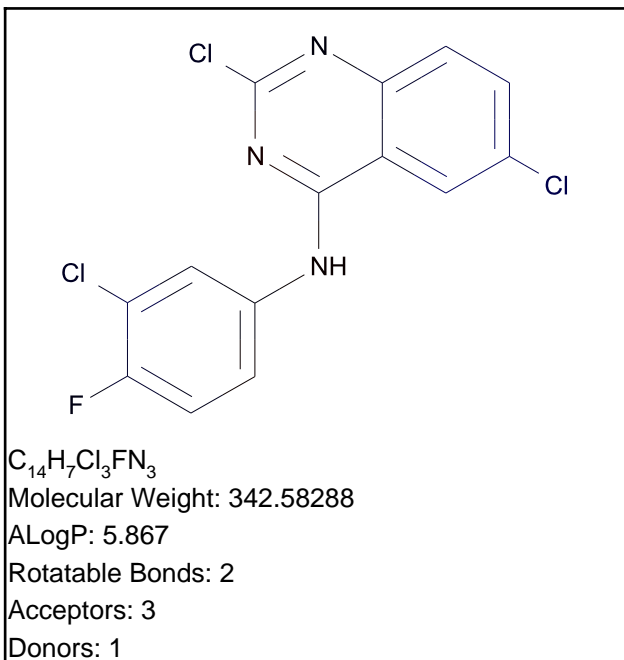

### Model Prediction

Prediction: Non-Carcinogen

Probability: 0.213

Enrichment: 0.664

Bayesian Score: -3.86

Mahalanobis Distance: 11.5

Mahalanobis Distance p-value: 0.036

Prediction: Positive if the Bayesian score is above the estimated best cutoff value from minimizing the false positive and false negative rate.

Probability: The estimated probability that the sample is in the positive category. This assumes that the Bayesian score follows a normal distribution and is different from the prediction using a cutoff.

Enrichment: An estimate of enrichment, that is, the increased likelihood (versus random) of this sample being in the category.

Bayesian Score: The standard Laplacian-modified Bayesian score.

Mahalanobis Distance: The Mahalanobis distance (MD) is the distance to the center of the training data. The larger the MD, the less trustworthy the prediction.

Mahalanobis Distance p-value: The p-value gives the fraction of training data with an MD greater than or equal to the one for the given sample, assuming normally distributed data. The smaller the p-value, the less trustworthy the prediction. For highly non-normal X properties (e.g., fingerprints), the MD p-value is wildly inaccurate.

### Structural Similar Compounds

| Name               | Quazepam                                                                            | Mestranol                                                                           | Loratidine                                                                          |
|--------------------|-------------------------------------------------------------------------------------|-------------------------------------------------------------------------------------|-------------------------------------------------------------------------------------|
| Structure          | 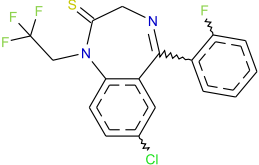 |  |  |
| Actual Endpoint    | Non-Carcinogen                                                                      | Carcinogen                                                                          | Non-Carcinogen                                                                      |
| Predicted Endpoint | Non-Carcinogen                                                                      | Carcinogen                                                                          | Non-Carcinogen                                                                      |
| Distance           | 0.627                                                                               | 0.631                                                                               | 0.634                                                                               |
| Reference          | US FDA (Centre for Drug Eval.& Res./Off. Testing & Res.) Sept. 1997                 | US FDA (Centre for Drug Eval.& Res./Off. Testing & Res.) Sept. 1997                 | US FDA (Centre for Drug Eval.& Res./Off. Testing & Res.) Sept. 1997                 |

### Model Applicability

Unknown features are fingerprint features in the query molecule, but not found or appearing too infrequently in the training set.

1. All properties and OPS components are within expected ranges.
2. Unknown ECFP\_2 feature: 1126732433: [\*]:n:[c](Cl):n:[\*]

### Feature Contribution

#### Top features for positive contribution

| Fingerprint | Bit/Smiles | Feature Structure                                                                                                                   | Score | Carcinogen in training set |
|-------------|------------|-------------------------------------------------------------------------------------------------------------------------------------|-------|----------------------------|
| ECFP_6      | 1049768340 | 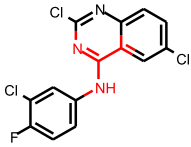<br><chem>[*]N[c](:n:[*]):[c](:[*]):[*]</chem> | 0.424 | 1 out of 1                 |

|                                        |             |                                                                                                                                            |        |                            |
|----------------------------------------|-------------|--------------------------------------------------------------------------------------------------------------------------------------------|--------|----------------------------|
| ECFP_6                                 | -177077903  | 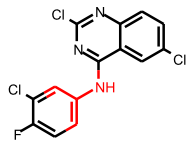<br><chem>[*]N[c](:[cH]:[*]):[cH]:[*]</chem>            | 0.279  | 4 out of 9                 |
| ECFP_6                                 | 888054369   | <br><chem>[*]N[c]1:[cH]:[*]:[c]([*]):[cH]:[cH]:1</chem> | 0.234  | 3 out of 7                 |
| Top Features for negative contribution |             |                                                                                                                                            |        |                            |
| Fingerprint                            | Bit/Smiles  | Feature Structure                                                                                                                          | Score  | Carcinogen in training set |
| ECFP_6                                 | 1335691903  | <br><chem>[*][c](:[*]):[c](Cl):[cH]:[*]</chem>          | -0.669 | 3 out of 22                |
| ECFP_6                                 | 577592657   | <br><chem>[*]:[c]1:[*]:[cH]:[cH][c](Cl):[cH]:1</chem>  | -0.586 | 3 out of 20                |
| ECFP_6                                 | -1242906247 | <br><chem>[*]:[c](:[*])N[c](:[*]):[*]</chem>          | -0.482 | 0 out of 2                 |

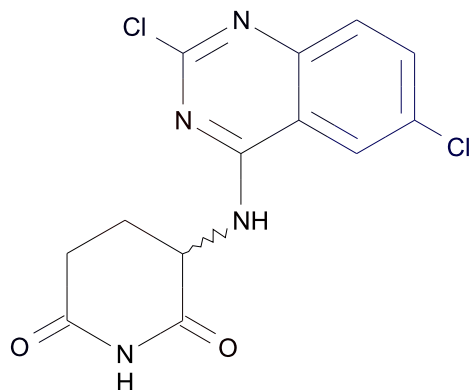
 $C_{13}H_{10}Cl_2N_4O_2$ 

Molecular Weight: 325.15009

ALogP: 2.49

Rotatable Bonds: 2

Acceptors: 5

Donors: 2

## Model Prediction

Prediction: Non-Carcinogen

Probability: 0.229

Enrichment: 0.714

Bayesian Score: -2.15

Mahalanobis Distance: 12.8

Mahalanobis Distance p-value: 0.00107

Prediction: Positive if the Bayesian score is above the estimated best cutoff value from minimizing the false positive and false negative rate.

Probability: The estimated probability that the sample is in the positive category. This assumes that the Bayesian score follows a normal distribution and is different from the prediction using a cutoff.

Enrichment: An estimate of enrichment, that is, the increased likelihood (versus random) of this sample being in the category.

Bayesian Score: The standard Laplacian-modified Bayesian score.

Mahalanobis Distance: The Mahalanobis distance (MD) is the distance to the center of the training data. The larger the MD, the less trustworthy the prediction.

Mahalanobis Distance p-value: The p-value gives the fraction of training data with an MD greater than or equal to the one for the given sample, assuming normally distributed data. The smaller the p-value, the less trustworthy the prediction. For highly non-normal X properties (e.g., fingerprints), the MD p-value is wildly inaccurate.

## Structural Similar Compounds

| Name               | Metolazone                                                          | Naltrexone                                                          | Indapamide                                                          |
|--------------------|---------------------------------------------------------------------|---------------------------------------------------------------------|---------------------------------------------------------------------|
| Structure          |                                                                     |                                                                     |                                                                     |
| Actual Endpoint    | Non-Carcinogen                                                      | Non-Carcinogen                                                      | Non-Carcinogen                                                      |
| Predicted Endpoint | Non-Carcinogen                                                      | Non-Carcinogen                                                      | Non-Carcinogen                                                      |
| Distance           | 0.564                                                               | 0.579                                                               | 0.583                                                               |
| Reference          | US FDA (Centre for Drug Eval.& Res./Off. Testing & Res.) Sept. 1997 | US FDA (Centre for Drug Eval.& Res./Off. Testing & Res.) Sept. 1997 | US FDA (Centre for Drug Eval.& Res./Off. Testing & Res.) Sept. 1997 |

## Model Applicability

Unknown features are fingerprint features in the query molecule, but not found or appearing too infrequently in the training set.

1. All properties and OPS components are within expected ranges.
2. Unknown ECFP\_2 feature: 1126732433: [\*]:n:[c](Cl):n:[\*]

## Feature Contribution

### Top features for positive contribution

| Fingerprint | Bit/Smiles | Feature Structure            | Score | Carcinogen in training set |
|-------------|------------|------------------------------|-------|----------------------------|
| ECFP_6      | 51876938   | <br><chem>[*]CCC(=O)N</chem> | 0.473 | 16 out of 31               |

| ECFP_6                                 | 1049768340  | 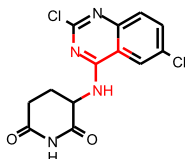<br><chem>[*]N[c](:n:[*]):[c](:[*]):[*]</chem>         | 0.424  | 1 out of 1                 |
|----------------------------------------|-------------|-------------------------------------------------------------------------------------------------------------------------------------------|--------|----------------------------|
| ECFP_6                                 | -1699286547 | <br><chem>[*]C(=[*])NC(=[*])[*]</chem>                 | 0.297  | 12 out of 28               |
| Top Features for negative contribution |             |                                                                                                                                           |        |                            |
| Fingerprint                            | Bit/Smiles  | Feature Structure                                                                                                                         | Score  | Carcinogen in training set |
| ECFP_6                                 | 577592657   | <br><chem>[*]:[c]1:[*]:[cH]:[cH]:[c](Cl):[cH]:1</chem> | -0.586 | 3 out of 20                |
| ECFP_6                                 | -176494269  | <br><chem>[*]:[cH]:[c](Cl):[cH]:[*]</chem>           | -0.476 | 5 out of 28                |
| ECFP_6                                 | 99947387    | <br><chem>[*]:[c](:[*])Cl</chem>                     | -0.461 | 9 out of 48                |

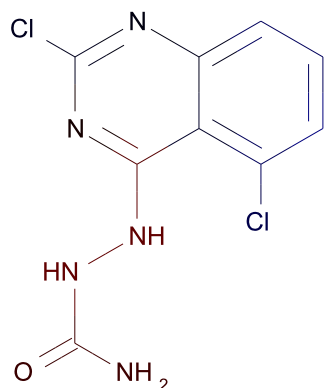

$C_9H_7Cl_2N_5O$

Molecular Weight: 272.09077

ALogP: 2.379

Rotatable Bonds: 2

Acceptors: 4

Donors: 3

## Model Prediction

Prediction: Non-Carcinogen

Probability: 0.236

Enrichment: 0.738

Bayesian Score: -1.57

Mahalanobis Distance: 8.74

Mahalanobis Distance p-value: 0.918

Prediction: Positive if the Bayesian score is above the estimated best cutoff value from minimizing the false positive and false negative rate.

Probability: The estimated probability that the sample is in the positive category. This assumes that the Bayesian score follows a normal distribution and is different from the prediction using a cutoff.

Enrichment: An estimate of enrichment, that is, the increased likelihood (versus random) of this sample being in the category.

Bayesian Score: The standard Laplacian-modified Bayesian score.

Mahalanobis Distance: The Mahalanobis distance (MD) is the distance to the center of the training data. The larger the MD, the less trustworthy the prediction.

Mahalanobis Distance p-value: The p-value gives the fraction of training data with an MD greater than or equal to the one for the given sample, assuming normally distributed data. The smaller the p-value, the less trustworthy the prediction. For highly non-normal X properties (e.g., fingerprints), the MD p-value is wildly inaccurate.

## Structural Similar Compounds

| Name               | Guanfacine                                                          | Lamotrigine                                                         | Guanabenz                                                           |
|--------------------|---------------------------------------------------------------------|---------------------------------------------------------------------|---------------------------------------------------------------------|
| Structure          |                                                                     |                                                                     |                                                                     |
| Actual Endpoint    | Non-Carcinogen                                                      | Non-Carcinogen                                                      | Carcinogen                                                          |
| Predicted Endpoint | Non-Carcinogen                                                      | Non-Carcinogen                                                      | Carcinogen                                                          |
| Distance           | 0.586                                                               | 0.597                                                               | 0.608                                                               |
| Reference          | US FDA (Centre for Drug Eval.& Res./Off. Testing & Res.) Sept. 1997 | US FDA (Centre for Drug Eval.& Res./Off. Testing & Res.) Sept. 1997 | US FDA (Centre for Drug Eval.& Res./Off. Testing & Res.) Sept. 1997 |

## Model Applicability

Unknown features are fingerprint features in the query molecule, but not found or appearing too infrequently in the training set.

1. All properties and OPS components are within expected ranges.
2. Unknown ECFP\_2 feature: 1126732433: [\*]:n:[c](Cl):n:[\*]

## Feature Contribution

### Top features for positive contribution

| Fingerprint | Bit/Smiles  | Feature Structure                                      | Score | Carcinogen in training set |
|-------------|-------------|--------------------------------------------------------|-------|----------------------------|
| ECFP_6      | -1661653144 | <br>[*][c]([*]):[c]([*])<br>([*]):[*]:[c]([*])<br>:[*] | 0.442 | 2 out of 3                 |

| ECFP_6                                 | 432952415   | 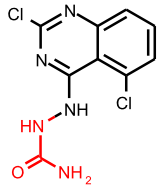<br><chem>[*]NC(=O)N</chem>                               | 0.442  | 2 out of 3                 |
|----------------------------------------|-------------|----------------------------------------------------------------------------------------------------------------------------------------------|--------|----------------------------|
| ECFP_6                                 | -1238415266 | <br><chem>[*]NN[c](:[*]):[*]</chem>                       | 0.424  | 1 out of 1                 |
| Top Features for negative contribution |             |                                                                                                                                              |        |                            |
| Fingerprint                            | Bit/Smiles  | Feature Structure                                                                                                                            | Score  | Carcinogen in training set |
| ECFP_6                                 | 1641317964  | <br><chem>[*]:[c]1:[*]:[cH]:[cH]:[cH]:[c]:1Cl</chem>      | -0.789 | 1 out of 11                |
| ECFP_6                                 | 1335691903  | <br><chem>[*][c](:[*]):[c](Cl):[cH]:[*]</chem>           | -0.669 | 3 out of 22                |
| ECFP_6                                 | 2007300961  | <br><chem>[*][c]1:[*]:[c](:[*]):[cH]:[cH]:[cH]:1</chem> | -0.652 | 5 out of 34                |

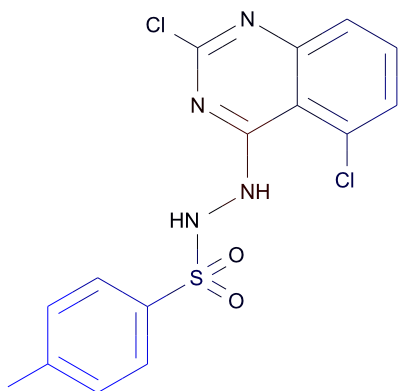

$C_{15}H_{12}Cl_2N_4O_2S$

Molecular Weight: 383.25237

ALogP: 4.443

Rotatable Bonds: 4

Acceptors: 5

Donors: 2

## Model Prediction

Prediction: Non-Carcinogen

Probability: 0.213

Enrichment: 0.664

Bayesian Score: -8.77

Mahalanobis Distance: 9.67

Mahalanobis Distance p-value: 0.599

Prediction: Positive if the Bayesian score is above the estimated best cutoff value from minimizing the false positive and false negative rate.

Probability: The estimated probability that the sample is in the positive category. This assumes that the Bayesian score follows a normal distribution and is different from the prediction using a cutoff.

Enrichment: An estimate of enrichment, that is, the increased likelihood (versus random) of this sample being in the category.

Bayesian Score: The standard Laplacian-modified Bayesian score.

Mahalanobis Distance: The Mahalanobis distance (MD) is the distance to the center of the training data. The larger the MD, the less trustworthy the prediction.

Mahalanobis Distance p-value: The p-value gives the fraction of training data with an MD greater than or equal to the one for the given sample, assuming normally distributed data. The smaller the p-value, the less trustworthy the prediction. For highly non-normal X properties (e.g., fingerprints), the MD p-value is wildly inaccurate.

## Structural Similar Compounds

| Name               | Niclosamide                                                         | Indapamide                                                          | Torsemide                                                           |
|--------------------|---------------------------------------------------------------------|---------------------------------------------------------------------|---------------------------------------------------------------------|
| Structure          |                                                                     |                                                                     |                                                                     |
| Actual Endpoint    | Non-Carcinogen                                                      | Non-Carcinogen                                                      | Non-Carcinogen                                                      |
| Predicted Endpoint | Non-Carcinogen                                                      | Non-Carcinogen                                                      | Non-Carcinogen                                                      |
| Distance           | 0.634                                                               | 0.646                                                               | 0.651                                                               |
| Reference          | US FDA (Centre for Drug Eval.& Res./Off. Testing & Res.) Sept. 1997 | US FDA (Centre for Drug Eval.& Res./Off. Testing & Res.) Sept. 1997 | US FDA (Centre for Drug Eval.& Res./Off. Testing & Res.) Sept. 1997 |

## Model Applicability

Unknown features are fingerprint features in the query molecule, but not found or appearing too infrequently in the training set.

1. All properties and OPS components are within expected ranges.
2. Unknown ECFP\_2 feature: 1126732433: [\*]:n:[c](Cl):n:[\*]
3. Unknown ECFP\_2 feature: 944235823: [\*]NNS(=[\*])(=[\*])[\*]

## Feature Contribution

### Top features for positive contribution

| Fingerprint | Bit/Smiles  | Feature Structure                                 | Score | Carcinogen in training set |
|-------------|-------------|---------------------------------------------------|-------|----------------------------|
| ECFP_6      | -1661653144 | <br>[*][c](:[*]):[c](:[c]([*]):[*]):[c](:[*]):[*] | 0.442 | 2 out of 3                 |

| ECFP_6                                 | -1238415266 | <br><chem>[*]NN[c](:[*]):[*]</chem>                   | 0.424 | 1 out of 1                 |
|----------------------------------------|-------------|-------------------------------------------------------|-------|----------------------------|
| ECFP_6                                 | 1049768340  | <br><chem>[*]N[c](:n:[*]):[c](:[*]):[*]</chem>        | 0.424 | 1 out of 1                 |
| Top Features for negative contribution |             |                                                       |       |                            |
| Fingerprint                            | Bit/Smiles  | Feature Structure                                     | Score | Carcinogen in training set |
| ECFP_6                                 | -179515162  | <br><chem>[*]:[cH]:[c](C):[cH]:[*]</chem>             | -1.41 | 0 out of 10                |
| ECFP_6                                 | -210573707  | <br><chem>[*][c]1:[*]:[cH]:[c](C):[cH]:[cH]:1</chem>  | -1.25 | 0 out of 8                 |
| ECFP_6                                 | -1926229349 | <br><chem>[*][c]1:[cH]:[cH]:[c](C):[cH]:[cH]:1</chem> | -1.05 | 0 out of 6                 |

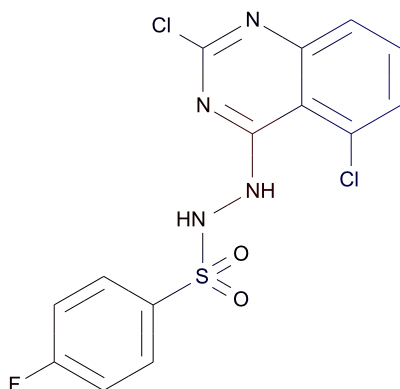

$C_{14}H_9Cl_2FN_4O_2S$

Molecular Weight: 387.21626

ALogP: 4.162

Rotatable Bonds: 4

Acceptors: 5

Donors: 2

## Model Prediction

Prediction: Non-Carcinogen

Probability: 0.22

Enrichment: 0.686

Bayesian Score: -2.98

Mahalanobis Distance: 11.5

Mahalanobis Distance p-value: 0.0333

Prediction: Positive if the Bayesian score is above the estimated best cutoff value from minimizing the false positive and false negative rate.

Probability: The estimated probability that the sample is in the positive category. This assumes that the Bayesian score follows a normal distribution and is different from the prediction using a cutoff.

Enrichment: An estimate of enrichment, that is, the increased likelihood (versus random) of this sample being in the category.

Bayesian Score: The standard Laplacian-modified Bayesian score.

Mahalanobis Distance: The Mahalanobis distance (MD) is the distance to the center of the training data. The larger the MD, the less trustworthy the prediction.

Mahalanobis Distance p-value: The p-value gives the fraction of training data with an MD greater than or equal to the one for the given sample, assuming normally distributed data. The smaller the p-value, the less trustworthy the prediction. For highly non-normal X properties (e.g., fingerprints), the MD p-value is wildly inaccurate.

## Structural Similar Compounds

| Name               | Bicalutamide                                                        | Niclosamide                                                         | Indapamide                                                          |
|--------------------|---------------------------------------------------------------------|---------------------------------------------------------------------|---------------------------------------------------------------------|
| Structure          |                                                                     |                                                                     |                                                                     |
| Actual Endpoint    | Non-Carcinogen                                                      | Non-Carcinogen                                                      | Non-Carcinogen                                                      |
| Predicted Endpoint | Non-Carcinogen                                                      | Non-Carcinogen                                                      | Non-Carcinogen                                                      |
| Distance           | 0.609                                                               | 0.624                                                               | 0.629                                                               |
| Reference          | US FDA (Centre for Drug Eval.& Res./Off. Testing & Res.) Sept. 1997 | US FDA (Centre for Drug Eval.& Res./Off. Testing & Res.) Sept. 1997 | US FDA (Centre for Drug Eval.& Res./Off. Testing & Res.) Sept. 1997 |

## Model Applicability

Unknown features are fingerprint features in the query molecule, but not found or appearing too infrequently in the training set.

1. All properties and OPS components are within expected ranges.
2. Unknown ECFP\_2 feature: 1126732433: [\*]:n:[c](Cl):n:[\*]
3. Unknown ECFP\_2 feature: 944235823: [\*]NNS(=[\*])(=[\*])[\*]

## Feature Contribution

### Top features for positive contribution

| Fingerprint | Bit/Smiles  | Feature Structure                                      | Score | Carcinogen in training set |
|-------------|-------------|--------------------------------------------------------|-------|----------------------------|
| ECFP_6      | -1661653144 | <br>[*][c]([*]):[c]([*])<br>([*]):[*]:[c]([*])<br>:[*] | 0.442 | 2 out of 3                 |

| ECFP_6                                 | -1238415266 | 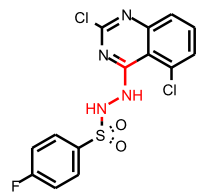<br><chem>[*]NN[c](:[*]):[*]</chem>                             | 0.424  | 1 out of 1                 |
|----------------------------------------|-------------|---------------------------------------------------------------------------------------------------------------------------------------------------|--------|----------------------------|
| ECFP_6                                 | 1049768340  | <br><chem>[*]N[c](:n:[*]):[c](:<br/>[*]):[*]</chem>            | 0.424  | 1 out of 1                 |
| Top Features for negative contribution |             |                                                                                                                                                   |        |                            |
| Fingerprint                            | Bit/Smiles  | Feature Structure                                                                                                                                 | Score  | Carcinogen in training set |
| ECFP_6                                 | 1641317964  | <br><chem>[*]:[c]1:[*]:[cH]:[cH]<br/>:[cH]:[c]:1Cl</chem>      | -0.789 | 1 out of 11                |
| ECFP_6                                 | 1335691903  | <br><chem>[*][c](:[*]):[c](Cl):<br/>[cH]:[*]</chem>           | -0.669 | 3 out of 22                |
| ECFP_6                                 | 2007300961  | <br><chem>[*][c]1:[*]:[c](:[*])<br/>:[cH]:[cH]:[cH]:1</chem> | -0.652 | 5 out of 34                |

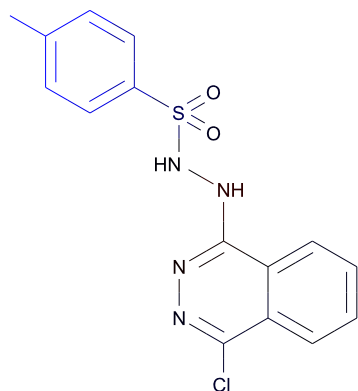

$C_{15}H_{13}ClN_4O_2S$

Molecular Weight: 348.80731

ALogP: 3.529

Rotatable Bonds: 4

Acceptors: 5

Donors: 2

## Model Prediction

Prediction: Non-Carcinogen

Probability: 0.21

Enrichment: 0.654

Bayesian Score: -8.24

Mahalanobis Distance: 9.28

Mahalanobis Distance p-value: 0.766

Prediction: Positive if the Bayesian score is above the estimated best cutoff value from minimizing the false positive and false negative rate.

Probability: The estimated probability that the sample is in the positive category. This assumes that the Bayesian score follows a normal distribution and is different from the prediction using a cutoff.

Enrichment: An estimate of enrichment, that is, the increased likelihood (versus random) of this sample being in the category. Bayesian Score: The standard Laplacian-modified Bayesian score.

Mahalanobis Distance: The Mahalanobis distance (MD) is the distance to the center of the training data. The larger the MD, the less trustworthy the prediction.

Mahalanobis Distance p-value: The p-value gives the fraction of training data with an MD greater than or equal to the one for the given sample, assuming normally distributed data. The smaller the p-value, the less trustworthy the prediction. For highly non-normal X properties (e.g., fingerprints), the MD p-value is wildly inaccurate.

## Structural Similar Compounds

| Name               | Tolazamide                                                          | Indapamide                                                          | Niclosamide                                                         |
|--------------------|---------------------------------------------------------------------|---------------------------------------------------------------------|---------------------------------------------------------------------|
| Structure          |                                                                     |                                                                     |                                                                     |
| Actual Endpoint    | Non-Carcinogen                                                      | Non-Carcinogen                                                      | Non-Carcinogen                                                      |
| Predicted Endpoint | Non-Carcinogen                                                      | Non-Carcinogen                                                      | Non-Carcinogen                                                      |
| Distance           | 0.562                                                               | 0.578                                                               | 0.580                                                               |
| Reference          | US FDA (Centre for Drug Eval.& Res./Off. Testing & Res.) Sept. 1997 | US FDA (Centre for Drug Eval.& Res./Off. Testing & Res.) Sept. 1997 | US FDA (Centre for Drug Eval.& Res./Off. Testing & Res.) Sept. 1997 |

## Model Applicability

Unknown features are fingerprint features in the query molecule, but not found or appearing too infrequently in the training set.

1. All properties and OPS components are within expected ranges.
2. Unknown ECFP\_2 feature: 944235823: [\*]NNS(=[\*])(=[\*])[\*]

## Feature Contribution

### Top features for positive contribution

| Fingerprint | Bit/Smiles  | Feature Structure      | Score | Carcinogen in training set |
|-------------|-------------|------------------------|-------|----------------------------|
| ECFP_6      | -1238415266 | <br>[*]NN[c](:[*]):[*] | 0.424 | 1 out of 1                 |

| ECFP_6                                 | 1049768340  | 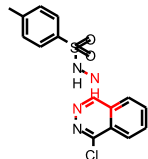<br><chem>[*]N[c](:n:[*]):[c](:[*]):[*]</chem>         | 0.424 | 1 out of 1                 |
|----------------------------------------|-------------|-------------------------------------------------------------------------------------------------------------------------------------------|-------|----------------------------|
| Top Features for negative contribution |             |                                                                                                                                           |       |                            |
| Fingerprint                            | Bit/Smiles  | Feature Structure                                                                                                                         | Score | Carcinogen in training set |
| ECFP_6                                 | -179515162  | <br><chem>[*]:[cH]:[c](C):[cH]:[*]</chem>              | -1.41 | 0 out of 10                |
| ECFP_6                                 | -210573707  | <br><chem>[*][c]1:[*]:[cH]:[c](C):[cH]:[cH]:1</chem>   | -1.25 | 0 out of 8                 |
| ECFP_6                                 | -1926229349 | <br><chem>[*][c]1:[cH]:[cH]:[c](C):[cH]:[cH]:1</chem> | -1.05 | 0 out of 6                 |

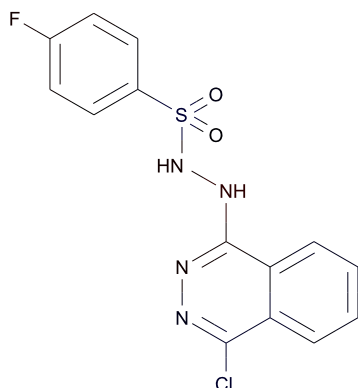

$C_{14}H_{10}ClFN_4O_2S$

Molecular Weight: 352.7712

ALogP: 3.248

Rotatable Bonds: 4

Acceptors: 5

Donors: 2

## Model Prediction

Prediction: Non-Carcinogen

Probability: 0.233

Enrichment: 0.725

Bayesian Score: -1.85

Mahalanobis Distance: 11.1

Mahalanobis Distance p-value: 0.0895

Prediction: Positive if the Bayesian score is above the estimated best cutoff value from minimizing the false positive and false negative rate.

Probability: The estimated probability that the sample is in the positive category. This assumes that the Bayesian score follows a normal distribution and is different from the prediction using a cutoff.

Enrichment: An estimate of enrichment, that is, the increased likelihood (versus random) of this sample being in the category.

Bayesian Score: The standard Laplacian-modified Bayesian score.

Mahalanobis Distance: The Mahalanobis distance (MD) is the distance to the center of the training data. The larger the MD, the less trustworthy the prediction.

Mahalanobis Distance p-value: The p-value gives the fraction of training data with an MD greater than or equal to the one for the given sample, assuming normally distributed data. The smaller the p-value, the less trustworthy the prediction. For highly non-normal X properties (e.g., fingerprints), the MD p-value is wildly inaccurate.

## Structural Similar Compounds

| Name               | Indapamide                                                          | Acetohexamide                                                       | Niclosamide                                                         |
|--------------------|---------------------------------------------------------------------|---------------------------------------------------------------------|---------------------------------------------------------------------|
| Structure          |                                                                     |                                                                     |                                                                     |
| Actual Endpoint    | Non-Carcinogen                                                      | Non-Carcinogen                                                      | Non-Carcinogen                                                      |
| Predicted Endpoint | Non-Carcinogen                                                      | Non-Carcinogen                                                      | Non-Carcinogen                                                      |
| Distance           | 0.567                                                               | 0.583                                                               | 0.583                                                               |
| Reference          | US FDA (Centre for Drug Eval.& Res./Off. Testing & Res.) Sept. 1997 | US FDA (Centre for Drug Eval.& Res./Off. Testing & Res.) Sept. 1997 | US FDA (Centre for Drug Eval.& Res./Off. Testing & Res.) Sept. 1997 |

## Model Applicability

Unknown features are fingerprint features in the query molecule, but not found or appearing too infrequently in the training set.

1. All properties and OPS components are within expected ranges.
2. Unknown ECFP\_2 feature: 944235823: [\*]NNS(=[\*])(=[\*])[\*]

## Feature Contribution

### Top features for positive contribution

| Fingerprint | Bit/Smiles | Feature Structure                 | Score | Carcinogen in training set |
|-------------|------------|-----------------------------------|-------|----------------------------|
| ECFP_6      | 1049768340 | <br>[*]N[c](:n:[*]):[c](:[*]):[*] | 0.424 | 1 out of 1                 |

|                                        |             |                                                                                                                                            |        |                            |
|----------------------------------------|-------------|--------------------------------------------------------------------------------------------------------------------------------------------|--------|----------------------------|
| ECFP_6                                 | -1238415266 | 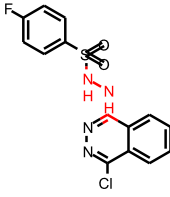<br>[*]NN[c](:[*]):[*]                                  | 0.424  | 1 out of 1                 |
| ECFP_6                                 | -296909061  | <br>F[c]1:[cH]:[cH]:[*]:[cH]:[cH]:1                     | 0.141  | 3 out of 8                 |
| Top Features for negative contribution |             |                                                                                                                                            |        |                            |
| Fingerprint                            | Bit/Smiles  | Feature Structure                                                                                                                          | Score  | Carcinogen in training set |
| ECFP_6                                 | 99947387    | <br>[*]:[c](:[*])Cl                                     | -0.461 | 9 out of 48                |
| ECFP_6                                 | 1050351974  | <br>[*]:n:[c](Cl):[c](:[*]):[*]                        | -0.27  | 0 out of 1                 |
| ECFP_6                                 | 74189795    | <br>[*]S(=[*])(=[*])[c]1:[cH]:[cH]:[c](F):[cH]:[cH]:1 | -0.27  | 0 out of 1                 |

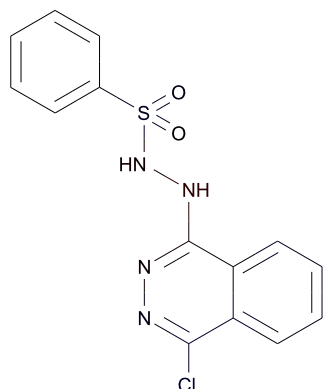

$C_{14}H_{11}ClN_4O_2S$

Molecular Weight: 334.78073

ALogP: 3.043

Rotatable Bonds: 4

Acceptors: 5

Donors: 2

## Model Prediction

Prediction: Non-Carcinogen

Probability: 0.227

Enrichment: 0.709

Bayesian Score: -2.28

Mahalanobis Distance: 9.73

Mahalanobis Distance p-value: 0.569

Prediction: Positive if the Bayesian score is above the estimated best cutoff value from minimizing the false positive and false negative rate.

Probability: The estimated probability that the sample is in the positive category. This assumes that the Bayesian score follows a normal distribution and is different from the prediction using a cutoff.

Enrichment: An estimate of enrichment, that is, the increased likelihood (versus random) of this sample being in the category.

Bayesian Score: The standard Laplacian-modified Bayesian score.

Mahalanobis Distance: The Mahalanobis distance (MD) is the distance to the center of the training data. The larger the MD, the less trustworthy the prediction.

Mahalanobis Distance p-value: The p-value gives the fraction of training data with an MD greater than or equal to the one for the given sample, assuming normally distributed data. The smaller the p-value, the less trustworthy the prediction. For highly non-normal X properties (e.g., fingerprints), the MD p-value is wildly inaccurate.

## Structural Similar Compounds

| Name               | Mebendazole                                                         | Acetohexamide                                                       | Indapamide                                                          |
|--------------------|---------------------------------------------------------------------|---------------------------------------------------------------------|---------------------------------------------------------------------|
| Structure          |                                                                     |                                                                     |                                                                     |
| Actual Endpoint    | Non-Carcinogen                                                      | Non-Carcinogen                                                      | Non-Carcinogen                                                      |
| Predicted Endpoint | Non-Carcinogen                                                      | Non-Carcinogen                                                      | Non-Carcinogen                                                      |
| Distance           | 0.562                                                               | 0.566                                                               | 0.569                                                               |
| Reference          | US FDA (Centre for Drug Eval.& Res./Off. Testing & Res.) Sept. 1997 | US FDA (Centre for Drug Eval.& Res./Off. Testing & Res.) Sept. 1997 | US FDA (Centre for Drug Eval.& Res./Off. Testing & Res.) Sept. 1997 |

## Model Applicability

Unknown features are fingerprint features in the query molecule, but not found or appearing too infrequently in the training set.

1. All properties and OPS components are within expected ranges.
2. Unknown ECFP\_2 feature: 944235823: [\*]NNS(=[\*])(=[\*])[\*]

## Feature Contribution

### Top features for positive contribution

| Fingerprint | Bit/Smiles  | Feature Structure      | Score | Carcinogen in training set |
|-------------|-------------|------------------------|-------|----------------------------|
| ECFP_6      | -1238415266 | <br>[*]NN[c](:[*]):[*] | 0.424 | 1 out of 1                 |

|                                        |            |                                                                                                                                   |        |                            |
|----------------------------------------|------------|-----------------------------------------------------------------------------------------------------------------------------------|--------|----------------------------|
| ECFP_6                                 | 1049768340 | 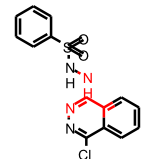<br><chem>[*]N[c](:n:[*]):[c](:[*]):[*]</chem> | 0.424  | 1 out of 1                 |
| Top Features for negative contribution |            |                                                                                                                                   |        |                            |
| Fingerprint                            | Bit/Smiles | Feature Structure                                                                                                                 | Score  | Carcinogen in training set |
| ECFP_6                                 | 99947387   | <br><chem>[*]:[c](:[*])Cl</chem>               | -0.461 | 9 out of 48                |
| ECFP_6                                 | 1050351974 | <br><chem>[*]:n:[c](Cl):[c](:[*])[*]</chem>    | -0.27  | 0 out of 1                 |
| ECFP_6                                 | 2102150379 | <br><chem>[*]S(=[*])(=O)[*]</chem>            | -0.263 | 5 out of 22                |

# Thalidomide

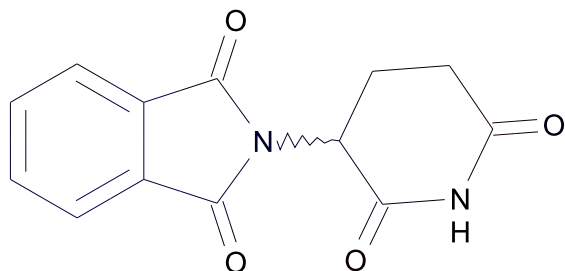

C<sub>13</sub>H<sub>10</sub>N<sub>2</sub>O<sub>4</sub>

Molecular Weight: 258.22949

ALogP: 9.7e-002

Rotatable Bonds: 1

Acceptors: 4

Donors: 1

## Model Prediction

Prediction: Non-Carcinogen

Probability: 0.244

Enrichment: 0.761

Bayesian Score: -1.06

Mahalanobis Distance: 11

Mahalanobis Distance p-value: 0.107

Prediction: Positive if the Bayesian score is above the estimated best cutoff value from minimizing the false positive and false negative rate.

Probability: The estimated probability that the sample is in the positive category. This assumes that the Bayesian score follows a normal distribution and is different from the prediction using a cutoff.

Enrichment: An estimate of enrichment, that is, the increased likelihood (versus random) of this sample being in the category.

Bayesian Score: The standard Laplacian-modified Bayesian score.

Mahalanobis Distance: The Mahalanobis distance (MD) is the distance to the center of the training data. The larger the MD, the less trustworthy the prediction.

Mahalanobis Distance p-value: The p-value gives the fraction of training data with an MD greater than or equal to the one for the given sample, assuming normally distributed data. The smaller the p-value, the less trustworthy the prediction. For highly non-normal X properties (e.g., fingerprints), the MD p-value is wildly inaccurate.

# TOPKAT\_Mouse\_Female\_FDA\_None\_vs\_Carcinogen

## Structural Similar Compounds

| Name               | Milrinone                                                           | Nalidixic acid                                                      | Theophylline                                                        |
|--------------------|---------------------------------------------------------------------|---------------------------------------------------------------------|---------------------------------------------------------------------|
| Structure          |                                                                     |                                                                     |                                                                     |
| Actual Endpoint    | Non-Carcinogen                                                      | Non-Carcinogen                                                      | Non-Carcinogen                                                      |
| Predicted Endpoint | Non-Carcinogen                                                      | Non-Carcinogen                                                      | Non-Carcinogen                                                      |
| Distance           | 0.597                                                               | 0.627                                                               | 0.630                                                               |
| Reference          | US FDA (Centre for Drug Eval.& Res./Off. Testing & Res.) Sept. 1997 | US FDA (Centre for Drug Eval.& Res./Off. Testing & Res.) Sept. 1997 | US FDA (Centre for Drug Eval.& Res./Off. Testing & Res.) Sept. 1997 |

## Model Applicability

Unknown features are fingerprint features in the query molecule, but not found or appearing too infrequently in the training set.

1. All properties and OPS components are within expected ranges.

## Feature Contribution

### Top features for positive contribution

| Fingerprint | Bit/Smiles | Feature Structure   | Score | Carcinogen in training set |
|-------------|------------|---------------------|-------|----------------------------|
| ECFP_6      | 51876938   | <br>[*]CCC(=[*])[*] | 0.473 | 16 out of 31               |

| ECFP_6                                 | -1699286547 | 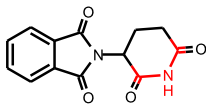<br><chem>[*]C(=[*])NC(=[*])[*]</chem>                                   | 0.297  | 12 out of 28               |
|----------------------------------------|-------------|-------------------------------------------------------------------------------------------------------------------------------------------------------------|--------|----------------------------|
| ECFP_6                                 | 2106656448  | <br><chem>[*]C(=O)[*]</chem>                                             | 0.254  | 31 out of 77               |
| Top Features for negative contribution |             |                                                                                                                                                             |        |                            |
| Fingerprint                            | Bit/Smiles  | Feature Structure                                                                                                                                           | Score  | Carcinogen in training set |
| ECFP_6                                 | -484970154  | <br><chem>[*]CC(N([*]))C(=[*])[*]</chem>                                 | -0.805 | 0 out of 4                 |
| ECFP_6                                 | -427397688  | <br><chem>[*]=C1[*][*][c](:[*])<br/>:[c]1:[cH]:[*]</chem>              | -0.476 | 5 out of 28                |
| ECFP_6                                 | 1984293270  | <br><chem>[*]=C1[*][*][c]2:[cH]<br/>:[cH]:[cH]:[cH]:[c]1<br/>:2</chem> | -0.311 | 2 out of 10                |

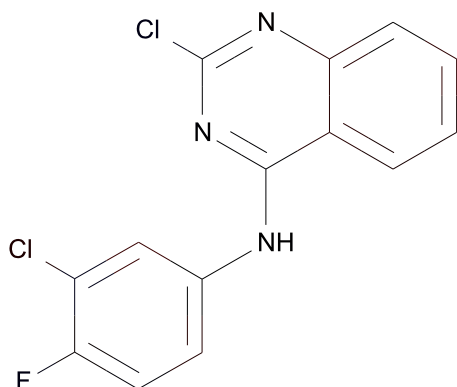
$$\text{C}_{14}\text{H}_8\text{Cl}_2\text{FN}_3$$

Molecular Weight: 308.13782

ALogP: 5.202

Rotatable Bonds: 2

Acceptors: 3

Donors: 1

## Model Prediction

**Prediction: Carcinogen**

Probability: 0.353

Enrichment: 1.2

Bayesian Score: 1.62

Mahalanobis Distance: 13

Mahalanobis Distance p-value: 0.000298

Prediction: Positive if the Bayesian score is above the estimated best cutoff value from minimizing the false positive and false negative rate.

**Probability:** The estimated probability that the sample is in the positive category. This assumes that the Bayesian score follows a normal distribution and is different from the prediction using a cutoff.

Enrichment: An estimate of enrichment, that is, the increased likelihood (versus random) of this sample being in the category.  
Bayesian Score: The standard Laplacian-modified Bayesian score.

**Mahalanobis Distance:** The Mahalanobis distance (MD) is the distance to the center of the training data. The larger the MD, the less trustworthy the prediction.

Mahalanobis Distance p-value: The p-value gives the fraction of training data with an MD greater than or equal to the one for the given sample, assuming normally distributed data. The smaller the p-value, the less trustworthy the prediction. For highly non-normal X properties (e.g., fingerprints), the MD p-value is wildly inaccurate.

## Structural Similar Compounds

| Name               | Mestranol                                                                           | Nafenopin                                                                           | Levonorgestrel                                                                      |
|--------------------|-------------------------------------------------------------------------------------|-------------------------------------------------------------------------------------|-------------------------------------------------------------------------------------|
| Structure          | 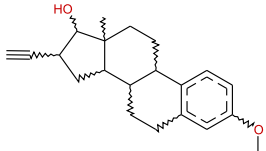 |  |  |
| Actual Endpoint    | Carcinogen                                                                          | Carcinogen                                                                          | Carcinogen                                                                          |
| Predicted Endpoint | Carcinogen                                                                          | Carcinogen                                                                          | Carcinogen                                                                          |
| Distance           | 0.605                                                                               | 0.609                                                                               | 0.609                                                                               |
| Reference          | US FDA (Centre for Drug Eval.& Res./Off. Testing & Res.) Sept. 1997                 | US FDA (Centre for Drug Eval.& Res./Off. Testing & Res.) Sept. 1997                 | US FDA (Centre for Drug Eval.& Res./Off. Testing & Res.) Sept. 1997                 |

## Model Applicability

Unknown features are fingerprint features in the query molecule, but not found or appearing too infrequently in the training set.

1. All properties and OPS components are within expected ranges.
2. Unknown FCFP\_2 feature: -1374842118: [\*]:n:[c](Cl):n:[\*]

## Feature Contribution

| Top features for positive contribution |            |                                                                                                                                                       |       |                            |
|----------------------------------------|------------|-------------------------------------------------------------------------------------------------------------------------------------------------------|-------|----------------------------|
| Fingerprint                            | Bit/Smiles | Feature Structure                                                                                                                                     | Score | Carcinogen in training set |
| FCFP_6                                 | -387072142 | 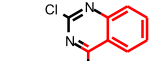<br><chem>[*][c](:[*]):[c]1:[cH]:[cH]:[cH]:[cH]:[c]:1:[*]</chem> | 0.477 | 4 out of 8                 |

|                                        |             |                                                                                                                                                   |        |                            |
|----------------------------------------|-------------|---------------------------------------------------------------------------------------------------------------------------------------------------|--------|----------------------------|
| FCFP_6                                 | -2132756387 | 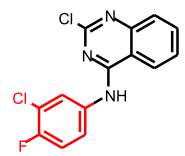<br>[*][c]1:[cH]:[cH]:[c]<br>(F):[c](Cl):[cH]:1                | 0.46   | 1 out of 1                 |
| FCFP_6                                 | -773983804  | <br>[*]N[c]1:[cH]:[*]:[c]<br>([*]):[cH]:[cH]:1                 | 0.409  | 10 out of 24               |
| Top Features for negative contribution |             |                                                                                                                                                   |        |                            |
| Fingerprint                            | Bit/Smiles  | Feature Structure                                                                                                                                 | Score  | Carcinogen in training set |
| FCFP_6                                 | 1293778554  | <br>[*]:[c](:[*])N[c](:[*])<br>):[*]                           | -0.719 | 0 out of 4                 |
| FCFP_6                                 | 551850122   | <br>[*][c]1:[*]:[c]([*]):<br>[c](F):[cH]:[cH]:1               | -0.433 | 8 out of 49                |
| FCFP_6                                 | 1122741451  | <br>[*]N[c]1:n:[*]:n:[c]2<br>:[cH]:[*]:[cH]:[cH]:<br>[c]:1:2 | -0.423 | 0 out of 2                 |

7a

## TOPKAT\_Mouse\_Male\_FDA\_None\_vs\_Carcinogen

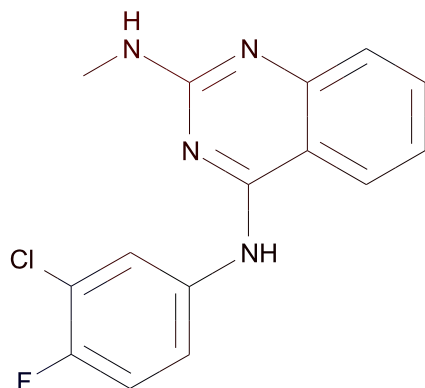C<sub>15</sub>H<sub>12</sub>ClFN<sub>4</sub>

Molecular Weight: 302.73398

ALogP: 4.677

Rotatable Bonds: 3

Acceptors: 4

Donors: 2

**Model Prediction****Prediction: Carcinogen**

Probability: 0.346

Enrichment: 1.17

Bayesian Score: 1.37

Mahalanobis Distance: 12.4

Mahalanobis Distance p-value: 0.00178

Prediction: Positive if the Bayesian score is above the estimated best cutoff value from minimizing the false positive and false negative rate.

Probability: The estimated probability that the sample is in the positive category. This assumes that the Bayesian score follows a normal distribution and is different from the prediction using a cutoff.

Enrichment: An estimate of enrichment, that is, the increased likelihood (versus random) of this sample being in the category.

Bayesian Score: The standard Laplacian-modified Bayesian score.

Mahalanobis Distance: The Mahalanobis distance (MD) is the distance to the center of the training data. The larger the MD, the less trustworthy the prediction.

Mahalanobis Distance p-value: The p-value gives the fraction of training data with an MD greater than or equal to the one for the given sample, assuming normally distributed data. The smaller the p-value, the less trustworthy the prediction. For highly non-normal X properties (e.g., fingerprints), the MD p-value is wildly inaccurate.

**Structural Similar Compounds**

| Name               | Diclofenac                                                          | Phenolphthalein                                                     | Etodolac                                                            |
|--------------------|---------------------------------------------------------------------|---------------------------------------------------------------------|---------------------------------------------------------------------|
| Structure          |                                                                     |                                                                     |                                                                     |
| Actual Endpoint    | Non-Carcinogen                                                      | Carcinogen                                                          | Non-Carcinogen                                                      |
| Predicted Endpoint | Non-Carcinogen                                                      | Carcinogen                                                          | Non-Carcinogen                                                      |
| Distance           | 0.530                                                               | 0.590                                                               | 0.614                                                               |
| Reference          | US FDA (Centre for Drug Eval.& Res./Off. Testing & Res.) Sept. 1997 | US FDA (Centre for Drug Eval.& Res./Off. Testing & Res.) Sept. 1997 | US FDA (Centre for Drug Eval.& Res./Off. Testing & Res.) Sept. 1997 |

**Model Applicability**

Unknown features are fingerprint features in the query molecule, but not found or appearing too infrequently in the training set.

1. All properties and OPS components are within expected ranges.

**Feature Contribution****Top features for positive contribution**

| Fingerprint | Bit/Smiles | Feature Structure                                                    | Score | Carcinogen in training set |
|-------------|------------|----------------------------------------------------------------------|-------|----------------------------|
| FCFP_6      | 960546407  | <br><chem>[*][c]1:[*]:[c]([*])</chem><br><chem>:n:[c](NC):n:1</chem> | 0.517 | 2 out of 3                 |

|                                        |             |                                                                                                                                                        |        |                            |
|----------------------------------------|-------------|--------------------------------------------------------------------------------------------------------------------------------------------------------|--------|----------------------------|
| FCFP_6                                 | -387072142  | 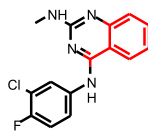<br><chem>[*][c](:[*]):[c]1:[cH]:[cH]:[cH]:[c]:1:[*]</chem>         | 0.477  | 4 out of 8                 |
| FCFP_6                                 | -2132756387 | <br><chem>[*][c]1:[cH]:[cH]:[c]:(F):[c](Cl):[cH]:1</chem>           | 0.46   | 1 out of 1                 |
| Top Features for negative contribution |             |                                                                                                                                                        |        |                            |
| Fingerprint                            | Bit/Smiles  | Feature Structure                                                                                                                                      | Score  | Carcinogen in training set |
| FCFP_6                                 | 1293778554  | <br><chem>[*]:[c](:[*])N[c](:[*]):[*]</chem>                        | -0.719 | 0 out of 4                 |
| FCFP_6                                 | 551850122   | <br><chem>[*][c]1:[*]:[c]([*]):[c](F):[cH]:[cH]:1</chem>           | -0.433 | 8 out of 49                |
| FCFP_6                                 | 1122741451  | <br><chem>[*]N[c]1:n:[*]:n:[c]2:[cH]:[*]:[cH]:[cH]:[c]:1:2</chem> | -0.423 | 0 out of 2                 |

7b

TOPKAT\_Mouse\_Male\_FDA\_None\_vs\_Carcinogen

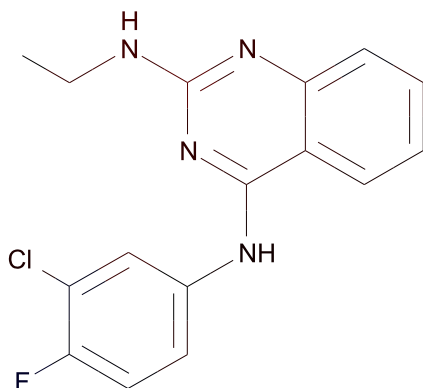C<sub>16</sub>H<sub>14</sub>ClFN<sub>4</sub>

Molecular Weight: 316.76056

ALogP: 5.025

Rotatable Bonds: 4

Acceptors: 4

Donors: 2

## Model Prediction

Prediction: Carcinogen

Probability: 0.358

Enrichment: 1.22

Bayesian Score: 1.77

Mahalanobis Distance: 13.3

Mahalanobis Distance p-value: 0.000109

Prediction: Positive if the Bayesian score is above the estimated best cutoff value from minimizing the false positive and false negative rate.

Probability: The estimated probability that the sample is in the positive category. This assumes that the Bayesian score follows a normal distribution and is different from the prediction using a cutoff.

Enrichment: An estimate of enrichment, that is, the increased likelihood (versus random) of this sample being in the category.

Bayesian Score: The standard Laplacian-modified Bayesian score.

Mahalanobis Distance: The Mahalanobis distance (MD) is the distance to the center of the training data. The larger the MD, the less trustworthy the prediction.

Mahalanobis Distance p-value: The p-value gives the fraction of training data with an MD greater than or equal to the one for the given sample, assuming normally distributed data. The smaller the p-value, the less trustworthy the prediction. For highly non-normal X properties (e.g., fingerprints), the MD p-value is wildly inaccurate.

## Structural Similar Compounds

| Name               | Diclofenac                                                          | Mefloquine                                                          | Indomethacin                                                        |
|--------------------|---------------------------------------------------------------------|---------------------------------------------------------------------|---------------------------------------------------------------------|
| Structure          |                                                                     |                                                                     |                                                                     |
| Actual Endpoint    | Non-Carcinogen                                                      | Non-Carcinogen                                                      | Non-Carcinogen                                                      |
| Predicted Endpoint | Non-Carcinogen                                                      | Non-Carcinogen                                                      | Non-Carcinogen                                                      |
| Distance           | 0.536                                                               | 0.592                                                               | 0.621                                                               |
| Reference          | US FDA (Centre for Drug Eval.& Res./Off. Testing & Res.) Sept. 1997 | US FDA (Centre for Drug Eval.& Res./Off. Testing & Res.) Sept. 1997 | US FDA (Centre for Drug Eval.& Res./Off. Testing & Res.) Sept. 1997 |

## Model Applicability

Unknown features are fingerprint features in the query molecule, but not found or appearing too infrequently in the training set.

1. All properties and OPS components are within expected ranges.

## Feature Contribution

### Top features for positive contribution

| Fingerprint | Bit/Smiles | Feature Structure                                                    | Score | Carcinogen in training set |
|-------------|------------|----------------------------------------------------------------------|-------|----------------------------|
| FCFP_6      | 960546407  | <br><chem>[*][c]1:[*]:[c]([*])</chem><br><chem>:n:[c](NC):n:1</chem> | 0.517 | 2 out of 3                 |

|                                        |             |                                                                                                                                                        |        |                            |
|----------------------------------------|-------------|--------------------------------------------------------------------------------------------------------------------------------------------------------|--------|----------------------------|
| FCFP_6                                 | -387072142  | 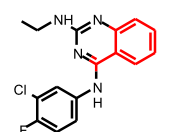<br><chem>[*][c](:[*]):[c]1:[cH]:[cH]:[cH]:[c]:1:[*]</chem>         | 0.477  | 4 out of 8                 |
| FCFP_6                                 | -2132756387 | <br><chem>[*][c]1:[cH]:[cH]:[c]:(F):[c](Cl):[cH]:1</chem>           | 0.46   | 1 out of 1                 |
| Top Features for negative contribution |             |                                                                                                                                                        |        |                            |
| Fingerprint                            | Bit/Smiles  | Feature Structure                                                                                                                                      | Score  | Carcinogen in training set |
| FCFP_6                                 | 1293778554  | <br><chem>[*]:[c](:[*])N[c](:[*]):[*]</chem>                        | -0.719 | 0 out of 4                 |
| FCFP_6                                 | 551850122   | <br><chem>[*][c]1:[*]:[c]([*]):[c](F):[cH]:[cH]:1</chem>           | -0.433 | 8 out of 49                |
| FCFP_6                                 | 1122741451  | <br><chem>[*]N[c]1:n:[*]:n:[c]2:[cH]:[*]:[cH]:[cH]:[c]:1:2</chem> | -0.423 | 0 out of 2                 |

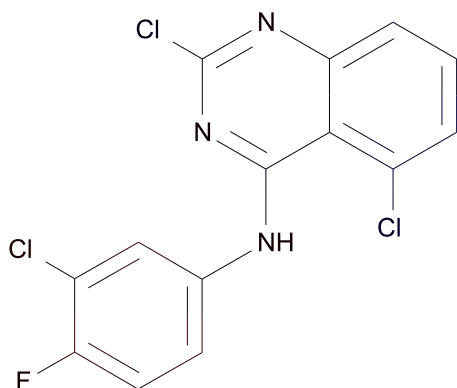

$C_{14}H_7Cl_3FN_3$

Molecular Weight: 342.58288

ALogP: 5.867

Rotatable Bonds: 2

Acceptors: 3

Donors: 1

## Model Prediction

Prediction: Carcinogen

Probability: 0.286

Enrichment: 0.972

Bayesian Score: -0.75

Mahalanobis Distance: 13

Mahalanobis Distance p-value: 0.0003

Prediction: Positive if the Bayesian score is above the estimated best cutoff value from minimizing the false positive and false negative rate.

Probability: The estimated probability that the sample is in the positive category. This assumes that the Bayesian score follows a normal distribution and is different from the prediction using a cutoff.

Enrichment: An estimate of enrichment, that is, the increased likelihood (versus random) of this sample being in the category.

Bayesian Score: The standard Laplacian-modified Bayesian score.

Mahalanobis Distance: The Mahalanobis distance (MD) is the distance to the center of the training data. The larger the MD, the less trustworthy the prediction.

Mahalanobis Distance p-value: The p-value gives the fraction of training data with an MD greater than or equal to the one for the given sample, assuming normally distributed data. The smaller the p-value, the less trustworthy the prediction. For highly non-normal X properties (e.g., fingerprints), the MD p-value is wildly inaccurate.

## Structural Similar Compounds

| Name               | Mestranol                                                           | Loratidine                                                          | Nafenopin                                                           |
|--------------------|---------------------------------------------------------------------|---------------------------------------------------------------------|---------------------------------------------------------------------|
| Structure          |                                                                     |                                                                     |                                                                     |
| Actual Endpoint    | Carcinogen                                                          | Carcinogen                                                          | Carcinogen                                                          |
| Predicted Endpoint | Carcinogen                                                          | Carcinogen                                                          | Carcinogen                                                          |
| Distance           | 0.633                                                               | 0.638                                                               | 0.646                                                               |
| Reference          | US FDA (Centre for Drug Eval.& Res./Off. Testing & Res.) Sept. 1997 | US FDA (Centre for Drug Eval.& Res./Off. Testing & Res.) Sept. 1997 | US FDA (Centre for Drug Eval.& Res./Off. Testing & Res.) Sept. 1997 |

## Model Applicability

Unknown features are fingerprint features in the query molecule, but not found or appearing too infrequently in the training set.

1. All properties and OPS components are within expected ranges.
2. Unknown FCFP\_2 feature: -1374842118: [\*]:n:[c](Cl):n:[\*]

## Feature Contribution

### Top features for positive contribution

| Fingerprint | Bit/Smiles  | Feature Structure                                    | Score | Carcinogen in training set |
|-------------|-------------|------------------------------------------------------|-------|----------------------------|
| FCFP_6      | -2132756387 | <p>[*]:[c]1:[cH]:[cH]:[c]<br/>(F):[c](Cl):[cH]:1</p> | 0.46  | 1 out of 1                 |

|                                        |            |                                                                                                                                              |        |                            |
|----------------------------------------|------------|----------------------------------------------------------------------------------------------------------------------------------------------|--------|----------------------------|
| FCFP_6                                 | -773983804 | 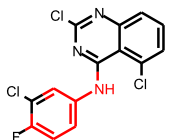<br><chem>[*]N[c]1:[cH]:[*]:[c]([*]):[cH]:[cH]:1</chem>   | 0.409  | 10 out of 24               |
| FCFP_6                                 | 590925877  | <br><chem>[*]N[c](:[cH]:[*]):[cH]:[*]</chem>              | 0.369  | 13 out of 33               |
| Top Features for negative contribution |            |                                                                                                                                              |        |                            |
| Fingerprint                            | Bit/Smiles | Feature Structure                                                                                                                            | Score  | Carcinogen in training set |
| FCFP_6                                 | 1293778554 | <br><chem>[*]:[c](:[*])N[c](:[*]):[*]</chem>              | -0.719 | 0 out of 4                 |
| FCFP_6                                 | 551850122  | <br><chem>[*][c]1:[*]:[c]([*]):[c](F):[cH]:[cH]:1</chem> | -0.433 | 8 out of 49                |
| FCFP_6                                 | 71476542   | <br><chem>[*]:[c](:[*])Cl</chem>                        | -0.406 | 10 out of 59               |

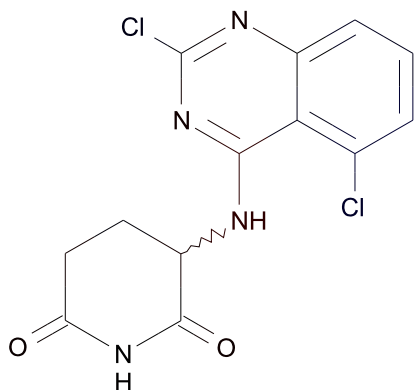
 $C_{13}H_{10}Cl_2N_4O_2$ 

Molecular Weight: 325.15009

ALogP: 2.49

Rotatable Bonds: 2

Acceptors: 5

Donors: 2

## Model Prediction

Prediction: Carcinogen

Probability: 0.275

Enrichment: 0.935

Bayesian Score: -1.19

Mahalanobis Distance: 12.8

Mahalanobis Distance p-value: 0.000579

Prediction: Positive if the Bayesian score is above the estimated best cutoff value from minimizing the false positive and false negative rate.

Probability: The estimated probability that the sample is in the positive category. This assumes that the Bayesian score follows a normal distribution and is different from the prediction using a cutoff.

Enrichment: An estimate of enrichment, that is, the increased likelihood (versus random) of this sample being in the category.

Bayesian Score: The standard Laplacian-modified Bayesian score.

Mahalanobis Distance: The Mahalanobis distance (MD) is the distance to the center of the training data. The larger the MD, the less trustworthy the prediction.

Mahalanobis Distance p-value: The p-value gives the fraction of training data with an MD greater than or equal to the one for the given sample, assuming normally distributed data. The smaller the p-value, the less trustworthy the prediction. For highly non-normal X properties (e.g., fingerprints), the MD p-value is wildly inaccurate.

## Structural Similar Compounds

| Name               | Metolazone                                                          | Tolazamide                                                          | Indapamide                                                          |
|--------------------|---------------------------------------------------------------------|---------------------------------------------------------------------|---------------------------------------------------------------------|
| Structure          |                                                                     |                                                                     |                                                                     |
| Actual Endpoint    | Non-Carcinogen                                                      | Non-Carcinogen                                                      | Non-Carcinogen                                                      |
| Predicted Endpoint | Non-Carcinogen                                                      | Non-Carcinogen                                                      | Non-Carcinogen                                                      |
| Distance           | 0.550                                                               | 0.566                                                               | 0.568                                                               |
| Reference          | US FDA (Centre for Drug Eval.& Res./Off. Testing & Res.) Sept. 1997 | US FDA (Centre for Drug Eval.& Res./Off. Testing & Res.) Sept. 1997 | US FDA (Centre for Drug Eval.& Res./Off. Testing & Res.) Sept. 1997 |

## Model Applicability

Unknown features are fingerprint features in the query molecule, but not found or appearing too infrequently in the training set.

1. All properties and OPS components are within expected ranges.
2. Unknown FCFP\_2 feature: -1374842118: [\*]:n:[c](Cl):n:[\*]

## Feature Contribution

### Top features for positive contribution

| Fingerprint | Bit/Smiles | Feature Structure | Score | Carcinogen in training set |
|-------------|------------|-------------------|-------|----------------------------|
| FCFP_6      | 566058135  | <br>[*]CC(=O)N[*] | 0.447 | 17 out of 40               |

|                                        |             |                                                                                                                                             |        |                            |
|----------------------------------------|-------------|---------------------------------------------------------------------------------------------------------------------------------------------|--------|----------------------------|
| FCFP_6                                 | 1294255210  | 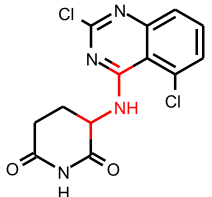<br><chem>[*]:[c](:[*])NC</chem>                         | 0.441  | 12 out of 28               |
| FCFP_6                                 | -1151884458 | <br><chem>[*]N[c](:n:[*]):[c](:[*]):[*]</chem>           | 0.348  | 6 out of 15                |
| Top Features for negative contribution |             |                                                                                                                                             |        |                            |
| Fingerprint                            | Bit/Smiles  | Feature Structure                                                                                                                           | Score  | Carcinogen in training set |
| FCFP_6                                 | 551850122   | <br><chem>[*][c]1:[*]:[c]([*]):[c](F):[cH]:[cH]:1</chem> | -0.433 | 8 out of 49                |
| FCFP_6                                 | 71476542    | <br><chem>[*]:[c](:[*])Cl</chem>                        | -0.406 | 10 out of 59               |
| FCFP_6                                 | 367998008   | <br><chem>[*][c](:[*]):[c](F):[cH]:[*]</chem>          | -0.374 | 10 out of 57               |

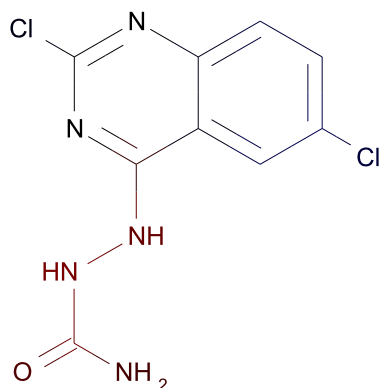

$C_9H_7Cl_2N_5O$

Molecular Weight: 272.09078

ALogP: 2.379

Rotatable Bonds: 2

Acceptors: 4

Donors: 3

## Model Prediction

Prediction: Carcinogen

Probability: 0.34

Enrichment: 1.15

Bayesian Score: 1.17

Mahalanobis Distance: 10.6

Mahalanobis Distance p-value: 0.15

Prediction: Positive if the Bayesian score is above the estimated best cutoff value from minimizing the false positive and false negative rate.

Probability: The estimated probability that the sample is in the positive category. This assumes that the Bayesian score follows a normal distribution and is different from the prediction using a cutoff.

Enrichment: An estimate of enrichment, that is, the increased likelihood (versus random) of this sample being in the category.

Bayesian Score: The standard Laplacian-modified Bayesian score.

Mahalanobis Distance: The Mahalanobis distance (MD) is the distance to the center of the training data. The larger the MD, the less trustworthy the prediction.

Mahalanobis Distance p-value: The p-value gives the fraction of training data with an MD greater than or equal to the one for the given sample, assuming normally distributed data. The smaller the p-value, the less trustworthy the prediction. For highly non-normal X properties (e.g., fingerprints), the MD p-value is wildly inaccurate.

## Structural Similar Compounds

| Name               | Pyrimethamine                                                       | Lamotrigine                                                         | Guanfacine                                                          |
|--------------------|---------------------------------------------------------------------|---------------------------------------------------------------------|---------------------------------------------------------------------|
| Structure          |                                                                     |                                                                     |                                                                     |
| Actual Endpoint    | Non-Carcinogen                                                      | Non-Carcinogen                                                      | Non-Carcinogen                                                      |
| Predicted Endpoint | Non-Carcinogen                                                      | Non-Carcinogen                                                      | Non-Carcinogen                                                      |
| Distance           | 0.595                                                               | 0.607                                                               | 0.611                                                               |
| Reference          | US FDA (Centre for Drug Eval.& Res./Off. Testing & Res.) Sept. 1997 | US FDA (Centre for Drug Eval.& Res./Off. Testing & Res.) Sept. 1997 | US FDA (Centre for Drug Eval.& Res./Off. Testing & Res.) Sept. 1997 |

## Model Applicability

Unknown features are fingerprint features in the query molecule, but not found or appearing too infrequently in the training set.

1. All properties and OPS components are within expected ranges.
2. Unknown FCFP\_2 feature: -1374842118: [\*]:n:[c](Cl):n:[\*]

## Feature Contribution

### Top features for positive contribution

| Fingerprint | Bit/Smiles | Feature Structure            | Score | Carcinogen in training set |
|-------------|------------|------------------------------|-------|----------------------------|
| FCFP_6      | -885461129 | <br><chem>[*]NNC(=O)N</chem> | 0.547 | 3 out of 5                 |

|                                        |             |                                                                                                                                                       |        |                            |
|----------------------------------------|-------------|-------------------------------------------------------------------------------------------------------------------------------------------------------|--------|----------------------------|
| FCFP_6                                 | 1294344583  | 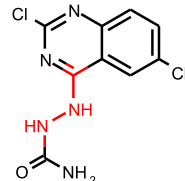<br><chem>[*]NN[c](:[*]):[*]</chem>                                | 0.517  | 2 out of 3                 |
| FCFP_6                                 | -1995759737 | <br><chem>[*]NNC(=O)N</chem>                                       | 0.46   | 1 out of 1                 |
| Top Features for negative contribution |             |                                                                                                                                                       |        |                            |
| Fingerprint                            | Bit/Smiles  | Feature Structure                                                                                                                                     | Score  | Carcinogen in training set |
| FCFP_6                                 | 551850122   | <br><chem>[*][c]1:[*]:[c]([*]):[c](F):[cH]:[cH]:1</chem>           | -0.433 | 8 out of 49                |
| FCFP_6                                 | 1122741451  | <br><chem>[*]N[c]1:n:[*]:n:[c]2:[cH]:[*]:[cH]:[cH]:[c]:1:2</chem> | -0.423 | 0 out of 2                 |
| FCFP_6                                 | 71476542    | <br><chem>[*]:[c](:[*])Cl</chem>                                 | -0.406 | 10 out of 59               |

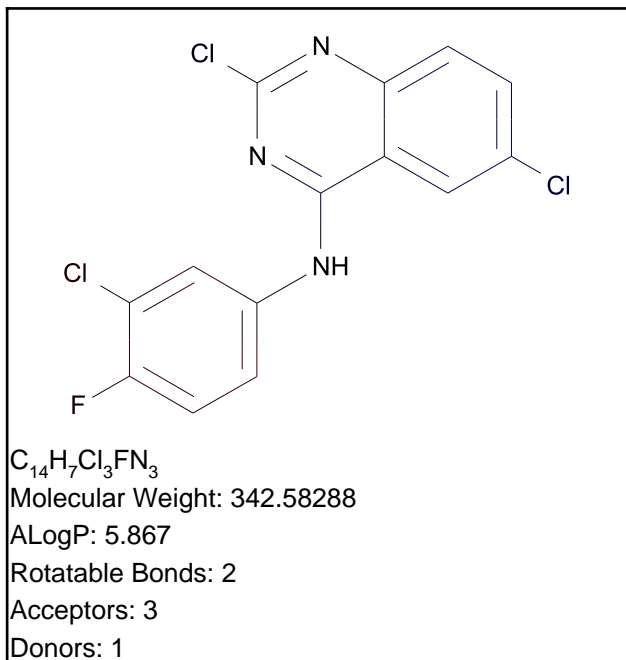

### Model Prediction

Prediction: Carcinogen

Probability: 0.273

Enrichment: 0.927

Bayesian Score: -1.29

Mahalanobis Distance: 12

Mahalanobis Distance p-value: 0.00584

Prediction: Positive if the Bayesian score is above the estimated best cutoff value from minimizing the false positive and false negative rate.

Probability: The estimated probability that the sample is in the positive category. This assumes that the Bayesian score follows a normal distribution and is different from the prediction using a cutoff.

Enrichment: An estimate of enrichment, that is, the increased likelihood (versus random) of this sample being in the category.

Bayesian Score: The standard Laplacian-modified Bayesian score.

Mahalanobis Distance: The Mahalanobis distance (MD) is the distance to the center of the training data. The larger the MD, the less trustworthy the prediction.

Mahalanobis Distance p-value: The p-value gives the fraction of training data with an MD greater than or equal to the one for the given sample, assuming normally distributed data. The smaller the p-value, the less trustworthy the prediction. For highly non-normal X properties (e.g., fingerprints), the MD p-value is wildly inaccurate.

### Structural Similar Compounds

| Name               | Loratidine                                                                          | Mestranol                                                                           | Levonorgestrel                                                                      |
|--------------------|-------------------------------------------------------------------------------------|-------------------------------------------------------------------------------------|-------------------------------------------------------------------------------------|
| Structure          | 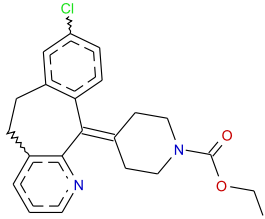 |  |  |
| Actual Endpoint    | Carcinogen                                                                          | Carcinogen                                                                          | Carcinogen                                                                          |
| Predicted Endpoint | Carcinogen                                                                          | Carcinogen                                                                          | Carcinogen                                                                          |
| Distance           | 0.633                                                                               | 0.633                                                                               | 0.649                                                                               |
| Reference          | US FDA (Centre for Drug Eval.& Res./Off. Testing & Res.) Sept. 1997                 | US FDA (Centre for Drug Eval.& Res./Off. Testing & Res.) Sept. 1997                 | US FDA (Centre for Drug Eval.& Res./Off. Testing & Res.) Sept. 1997                 |

### Model Applicability

Unknown features are fingerprint features in the query molecule, but not found or appearing too infrequently in the training set.

1. All properties and OPS components are within expected ranges.
2. Unknown FCFP\_2 feature: -1374842118: [\*]:n:[c](Cl):n:[\*]

### Feature Contribution

#### Top features for positive contribution

| Fingerprint | Bit/Smiles  | Feature Structure                                                                                                                    | Score | Carcinogen in training set |
|-------------|-------------|--------------------------------------------------------------------------------------------------------------------------------------|-------|----------------------------|
| FCFP_6      | -2132756387 | 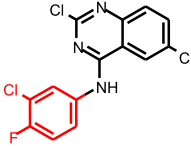<br>[*][c]1:[cH]:[cH]:[c]<br>(F):[c](Cl):[cH]:1 | 0.46  | 1 out of 1                 |

|                                        |            |                                                                                                                                                        |        |                            |
|----------------------------------------|------------|--------------------------------------------------------------------------------------------------------------------------------------------------------|--------|----------------------------|
| FCFP_6                                 | -773983804 | 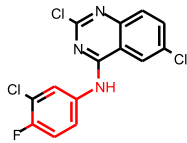<br><chem>[*]N[c]1:[cH]:[*]:[c]([*]):[cH]:1</chem>                  | 0.409  | 10 out of 24               |
| FCFP_6                                 | 590925877  | <br><chem>[*]N[c](:[cH]:[*]):[cH]:[*]</chem>                        | 0.369  | 13 out of 33               |
| Top Features for negative contribution |            |                                                                                                                                                        |        |                            |
| Fingerprint                            | Bit/Smiles | Feature Structure                                                                                                                                      | Score  | Carcinogen in training set |
| FCFP_6                                 | 1293778554 | <br><chem>[*]:[c](:[*])N[c](:[*]):[*]</chem>                        | -0.719 | 0 out of 4                 |
| FCFP_6                                 | 551850122  | <br><chem>[*][c]1:[*]:[c]([*]):[c](F):[cH]:[cH]:1</chem>           | -0.433 | 8 out of 49                |
| FCFP_6                                 | 1122741451 | <br><chem>[*]N[c]1:n:[*]:n:[c]2:[cH]:[*]:[cH]:[cH]:[c]:1:2</chem> | -0.423 | 0 out of 2                 |

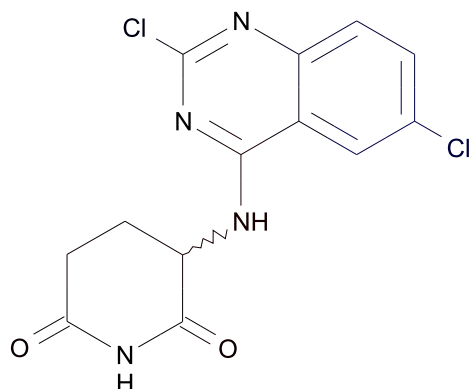

$C_{13}H_{10}Cl_2N_4O_2$

Molecular Weight: 325.15009

ALogP: 2.49

Rotatable Bonds: 2

Acceptors: 5

Donors: 2

## Model Prediction

Prediction: Carcinogen

Probability: 0.262

Enrichment: 0.892

Bayesian Score: -1.73

Mahalanobis Distance: 12.2

Mahalanobis Distance p-value: 0.00356

Prediction: Positive if the Bayesian score is above the estimated best cutoff value from minimizing the false positive and false negative rate.

Probability: The estimated probability that the sample is in the positive category. This assumes that the Bayesian score follows a normal distribution and is different from the prediction using a cutoff.

Enrichment: An estimate of enrichment, that is, the increased likelihood (versus random) of this sample being in the category.

Bayesian Score: The standard Laplacian-modified Bayesian score.

Mahalanobis Distance: The Mahalanobis distance (MD) is the distance to the center of the training data. The larger the MD, the less trustworthy the prediction.

Mahalanobis Distance p-value: The p-value gives the fraction of training data with an MD greater than or equal to the one for the given sample, assuming normally distributed data. The smaller the p-value, the less trustworthy the prediction. For highly non-normal X properties (e.g., fingerprints), the MD p-value is wildly inaccurate.

## Structural Similar Compounds

| Name               | Metolazone                                                          | Tolazamide                                                          | Indapamide                                                          |
|--------------------|---------------------------------------------------------------------|---------------------------------------------------------------------|---------------------------------------------------------------------|
| Structure          |                                                                     |                                                                     |                                                                     |
| Actual Endpoint    | Non-Carcinogen                                                      | Non-Carcinogen                                                      | Non-Carcinogen                                                      |
| Predicted Endpoint | Non-Carcinogen                                                      | Non-Carcinogen                                                      | Non-Carcinogen                                                      |
| Distance           | 0.556                                                               | 0.566                                                               | 0.574                                                               |
| Reference          | US FDA (Centre for Drug Eval.& Res./Off. Testing & Res.) Sept. 1997 | US FDA (Centre for Drug Eval.& Res./Off. Testing & Res.) Sept. 1997 | US FDA (Centre for Drug Eval.& Res./Off. Testing & Res.) Sept. 1997 |

## Model Applicability

Unknown features are fingerprint features in the query molecule, but not found or appearing too infrequently in the training set.

1. All properties and OPS components are within expected ranges.
2. Unknown FCFP\_2 feature: -1374842118: [\*]:n:[c](Cl):n:[\*]

## Feature Contribution

### Top features for positive contribution

| Fingerprint | Bit/Smiles | Feature Structure | Score | Carcinogen in training set |
|-------------|------------|-------------------|-------|----------------------------|
| FCFP_6      | 566058135  | <br>[*]CC(=O)N[*] | 0.447 | 17 out of 40               |

| FCFP_6                                 | 1294255210  | 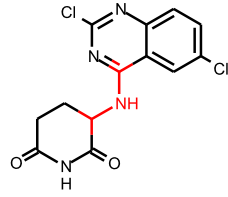<br><chem>[*]:[c](:[*])NC</chem>                                   | 0.441  | 12 out of 28               |
|----------------------------------------|-------------|-------------------------------------------------------------------------------------------------------------------------------------------------------|--------|----------------------------|
| FCFP_6                                 | -1151884458 | <br><chem>[*]N[c](:n:[*]):[c](:[*]):[*]</chem>                     | 0.348  | 6 out of 15                |
| Top Features for negative contribution |             |                                                                                                                                                       |        |                            |
| Fingerprint                            | Bit/Smiles  | Feature Structure                                                                                                                                     | Score  | Carcinogen in training set |
| FCFP_6                                 | 551850122   | <br><chem>[*][c]1:[*]:[c]([*]):[c](F):[cH]:[cH]:1</chem>           | -0.433 | 8 out of 49                |
| FCFP_6                                 | 1122741451  | <br><chem>[*]N[c]1:n:[*]:n:[c]2:[cH]:[*]:[cH]:[cH]:[c]:1:2</chem> | -0.423 | 0 out of 2                 |
| FCFP_6                                 | 71476542    | <br><chem>[*]:[c](:[*])Cl</chem>                                 | -0.406 | 10 out of 59               |

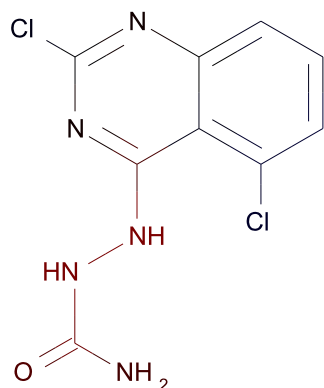

$C_9H_7Cl_2N_5O$

Molecular Weight: 272.09077

ALogP: 2.379

Rotatable Bonds: 2

Acceptors: 4

Donors: 3

## Model Prediction

Prediction: Carcinogen

Probability: 0.356

Enrichment: 1.21

Bayesian Score: 1.71

Mahalanobis Distance: 12.3

Mahalanobis Distance p-value: 0.00285

Prediction: Positive if the Bayesian score is above the estimated best cutoff value from minimizing the false positive and false negative rate.

Probability: The estimated probability that the sample is in the positive category. This assumes that the Bayesian score follows a normal distribution and is different from the prediction using a cutoff.

Enrichment: An estimate of enrichment, that is, the increased likelihood (versus random) of this sample being in the category.

Bayesian Score: The standard Laplacian-modified Bayesian score.

Mahalanobis Distance: The Mahalanobis distance (MD) is the distance to the center of the training data. The larger the MD, the less trustworthy the prediction.

Mahalanobis Distance p-value: The p-value gives the fraction of training data with an MD greater than or equal to the one for the given sample, assuming normally distributed data. The smaller the p-value, the less trustworthy the prediction. For highly non-normal X properties (e.g., fingerprints), the MD p-value is wildly inaccurate.

## Structural Similar Compounds

| Name               | Lamotrigine                                                         | Guanfacine                                                          | Pyrimethamine                                                       |
|--------------------|---------------------------------------------------------------------|---------------------------------------------------------------------|---------------------------------------------------------------------|
| Structure          |                                                                     |                                                                     |                                                                     |
| Actual Endpoint    | Non-Carcinogen                                                      | Non-Carcinogen                                                      | Non-Carcinogen                                                      |
| Predicted Endpoint | Non-Carcinogen                                                      | Non-Carcinogen                                                      | Non-Carcinogen                                                      |
| Distance           | 0.599                                                               | 0.602                                                               | 0.604                                                               |
| Reference          | US FDA (Centre for Drug Eval.& Res./Off. Testing & Res.) Sept. 1997 | US FDA (Centre for Drug Eval.& Res./Off. Testing & Res.) Sept. 1997 | US FDA (Centre for Drug Eval.& Res./Off. Testing & Res.) Sept. 1997 |

## Model Applicability

Unknown features are fingerprint features in the query molecule, but not found or appearing too infrequently in the training set.

1. All properties and OPS components are within expected ranges.
2. Unknown FCFP\_2 feature: -1374842118: [\*]:n:[c](Cl):n:[\*]

## Feature Contribution

### Top features for positive contribution

| Fingerprint | Bit/Smiles | Feature Structure                | Score | Carcinogen in training set |
|-------------|------------|----------------------------------|-------|----------------------------|
| FCFP_6      | -885461129 | <br><chem>[*]NNC(=[*])[*]</chem> | 0.547 | 3 out of 5                 |

|                                        |            |                                                                                                                                            |        |                            |
|----------------------------------------|------------|--------------------------------------------------------------------------------------------------------------------------------------------|--------|----------------------------|
| FCFP_6                                 | 1294344583 | 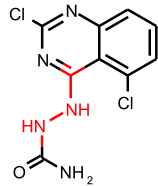<br><chem>[*]NN[c](:[*]):[*]</chem>                     | 0.517  | 2 out of 3                 |
| FCFP_6                                 | 1572236312 | <br><chem>[*]:c](:[*])NNC(=O)N</chem>                   | 0.46   | 1 out of 1                 |
| Top Features for negative contribution |            |                                                                                                                                            |        |                            |
| Fingerprint                            | Bit/Smiles | Feature Structure                                                                                                                          | Score  | Carcinogen in training set |
| FCFP_6                                 | 551850122  | <br><chem>[*][c]1:[*]:c]([*]):[c](F):[cH]:[cH]:1</chem> | -0.433 | 8 out of 49                |
| FCFP_6                                 | 71476542   | <br><chem>[*]:[c](:[*])Cl</chem>                       | -0.406 | 10 out of 59               |
| FCFP_6                                 | 367998008  | <br><chem>[*][c](:[*]):[c](F):[cH]:[*]</chem>         | -0.374 | 10 out of 57               |

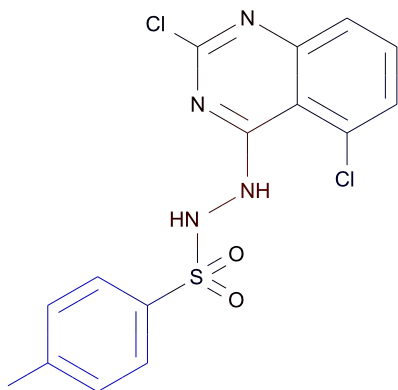

$C_{15}H_{12}Cl_2N_4O_2S$

Molecular Weight: 383.25237

ALogP: 4.443

Rotatable Bonds: 4

Acceptors: 5

Donors: 2

## Model Prediction

Prediction: Non-Carcinogen

Probability: 0.227

Enrichment: 0.773

Bayesian Score: -3.4

Mahalanobis Distance: 12.7

Mahalanobis Distance p-value: 0.000761

Prediction: Positive if the Bayesian score is above the estimated best cutoff value from minimizing the false positive and false negative rate.

Probability: The estimated probability that the sample is in the positive category. This assumes that the Bayesian score follows a normal distribution and is different from the prediction using a cutoff.

Enrichment: An estimate of enrichment, that is, the increased likelihood (versus random) of this sample being in the category.

Bayesian Score: The standard Laplacian-modified Bayesian score.

Mahalanobis Distance: The Mahalanobis distance (MD) is the distance to the center of the training data. The larger the MD, the less trustworthy the prediction.

Mahalanobis Distance p-value: The p-value gives the fraction of training data with an MD greater than or equal to the one for the given sample, assuming normally distributed data. The smaller the p-value, the less trustworthy the prediction. For highly non-normal X properties (e.g., fingerprints), the MD p-value is wildly inaccurate.

## Structural Similar Compounds

| Name               | Niclosamide                                                         | Indomethacin                                                        | Indapamide                                                          |
|--------------------|---------------------------------------------------------------------|---------------------------------------------------------------------|---------------------------------------------------------------------|
| Structure          |                                                                     |                                                                     |                                                                     |
| Actual Endpoint    | Non-Carcinogen                                                      | Non-Carcinogen                                                      | Non-Carcinogen                                                      |
| Predicted Endpoint | Non-Carcinogen                                                      | Non-Carcinogen                                                      | Non-Carcinogen                                                      |
| Distance           | 0.604                                                               | 0.611                                                               | 0.624                                                               |
| Reference          | US FDA (Centre for Drug Eval.& Res./Off. Testing & Res.) Sept. 1997 | US FDA (Centre for Drug Eval.& Res./Off. Testing & Res.) Sept. 1997 | US FDA (Centre for Drug Eval.& Res./Off. Testing & Res.) Sept. 1997 |

## Model Applicability

Unknown features are fingerprint features in the query molecule, but not found or appearing too infrequently in the training set.

1. All properties and OPS components are within expected ranges.
2. Unknown FCFP\_2 feature: -1374842118: [\*]:n:[c](Cl):n:[\*]

## Feature Contribution

### Top features for positive contribution

| Fingerprint | Bit/Smiles | Feature Structure | Score | Carcinogen in training set |
|-------------|------------|-------------------|-------|----------------------------|
| FCFP_6      | -885461129 |                   | 0.547 | 3 out of 5                 |

[\*]NNC(=[\*])[\*]

|                                        |             |                                                                                                                                                        |        |                            |
|----------------------------------------|-------------|--------------------------------------------------------------------------------------------------------------------------------------------------------|--------|----------------------------|
| FCFP_6                                 | 1294344583  | 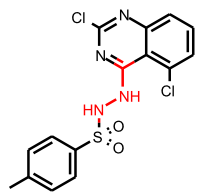<br><chem>[*]NN[c](:[*]):[*]</chem>                                  | 0.517  | 2 out of 3                 |
| FCFP_6                                 | -1151884458 | <br><chem>[*]N[c](:n:[*]):[c](:[*]):[*]</chem>                      | 0.348  | 6 out of 15                |
| Top Features for negative contribution |             |                                                                                                                                                        |        |                            |
| Fingerprint                            | Bit/Smiles  | Feature Structure                                                                                                                                      | Score  | Carcinogen in training set |
| FCFP_6                                 | -1773728142 | <br><chem>C[c]1:[cH]:[cH]:[*]:[cH]:[cH]:1</chem>                    | -1.29  | 0 out of 10                |
| FCFP_6                                 | 632767364   | <br><chem>[*]S(=[*])(=[*])[c]1:[cH]:[cH]:[c](C):[cH]:[cH]:1</chem> | -1.04  | 0 out of 7                 |
| FCFP_6                                 | 2109043264  | <br><chem>[*][c]1:[cH]:[cH]:[c](C):[cH]:[cH]:1</chem>             | -0.947 | 0 out of 6                 |

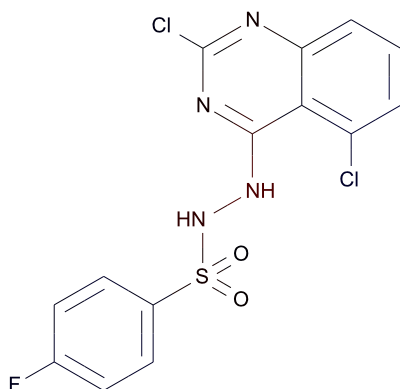

$C_{14}H_9Cl_2FN_4O_2S$

Molecular Weight: 387.21626

ALogP: 4.162

Rotatable Bonds: 4

Acceptors: 5

Donors: 2

## Model Prediction

Prediction: Carcinogen

Probability: 0.307

Enrichment: 1.04

Bayesian Score: 0.0577

Mahalanobis Distance: 9.9

Mahalanobis Distance p-value: 0.421

Prediction: Positive if the Bayesian score is above the estimated best cutoff value from minimizing the false positive and false negative rate.

Probability: The estimated probability that the sample is in the positive category. This assumes that the Bayesian score follows a normal distribution and is different from the prediction using a cutoff.

Enrichment: An estimate of enrichment, that is, the increased likelihood (versus random) of this sample being in the category.

Bayesian Score: The standard Laplacian-modified Bayesian score.

Mahalanobis Distance: The Mahalanobis distance (MD) is the distance to the center of the training data. The larger the MD, the less trustworthy the prediction.

Mahalanobis Distance p-value: The p-value gives the fraction of training data with an MD greater than or equal to the one for the given sample, assuming normally distributed data. The smaller the p-value, the less trustworthy the prediction. For highly non-normal X properties (e.g., fingerprints), the MD p-value is wildly inaccurate.

## Structural Similar Compounds

| Name               | Niclosamide                                                         | Bicalutamide                                                        | Indapamide                                                          |
|--------------------|---------------------------------------------------------------------|---------------------------------------------------------------------|---------------------------------------------------------------------|
| Structure          |                                                                     |                                                                     |                                                                     |
| Actual Endpoint    | Non-Carcinogen                                                      | Carcinogen                                                          | Non-Carcinogen                                                      |
| Predicted Endpoint | Non-Carcinogen                                                      | Carcinogen                                                          | Non-Carcinogen                                                      |
| Distance           | 0.586                                                               | 0.601                                                               | 0.601                                                               |
| Reference          | US FDA (Centre for Drug Eval.& Res./Off. Testing & Res.) Sept. 1997 | US FDA (Centre for Drug Eval.& Res./Off. Testing & Res.) Sept. 1997 | US FDA (Centre for Drug Eval.& Res./Off. Testing & Res.) Sept. 1997 |

## Model Applicability

Unknown features are fingerprint features in the query molecule, but not found or appearing too infrequently in the training set.

1. All properties and OPS components are within expected ranges.
2. Unknown FCFP\_2 feature: -1374842118: [\*]:n:[c](Cl):n:[\*]

## Feature Contribution

### Top features for positive contribution

| Fingerprint | Bit/Smiles | Feature Structure | Score | Carcinogen in training set |
|-------------|------------|-------------------|-------|----------------------------|
| FCFP_6      | -885461129 |                   | 0.547 | 3 out of 5                 |

[\*]NNC(=[\*])[\*]

|                                        |             |                                                                                                                                             |        |                            |
|----------------------------------------|-------------|---------------------------------------------------------------------------------------------------------------------------------------------|--------|----------------------------|
| FCFP_6                                 | 1294344583  | 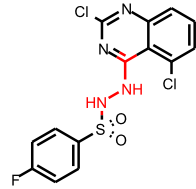<br><chem>[*]NN[c](:[*]):[*]</chem>                      | 0.517  | 2 out of 3                 |
| FCFP_6                                 | -1151884458 | <br><chem>[*]N[c](:n:[*]):[c](:[*]):[*]</chem>           | 0.348  | 6 out of 15                |
| Top Features for negative contribution |             |                                                                                                                                             |        |                            |
| Fingerprint                            | Bit/Smiles  | Feature Structure                                                                                                                           | Score  | Carcinogen in training set |
| FCFP_6                                 | 551850122   | <br><chem>[*][c]1:[*]:[c]([*]):[c](F):[cH]:[cH]:1</chem> | -0.433 | 8 out of 49                |
| FCFP_6                                 | 71476542    | <br><chem>[*]:[c](:[*])Cl</chem>                        | -0.406 | 10 out of 59               |
| FCFP_6                                 | 367998008   | <br><chem>[*][c](:[*]):[c](F):[cH]:[*]</chem>          | -0.374 | 10 out of 57               |

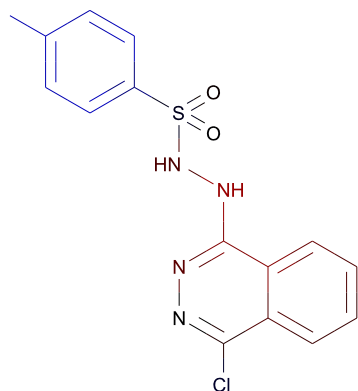

$C_{15}H_{13}ClN_4O_2S$

Molecular Weight: 348.80731

ALogP: 3.529

Rotatable Bonds: 4

Acceptors: 5

Donors: 2

## Model Prediction

Prediction: Carcinogen

Probability: 0.289

Enrichment: 0.983

Bayesian Score: -0.629

Mahalanobis Distance: 18.8

Mahalanobis Distance p-value: 4.69e-016

Prediction: Positive if the Bayesian score is above the estimated best cutoff value from minimizing the false positive and false negative rate.

Probability: The estimated probability that the sample is in the positive category. This assumes that the Bayesian score follows a normal distribution and is different from the prediction using a cutoff.

Enrichment: An estimate of enrichment, that is, the increased likelihood (versus random) of this sample being in the category.

Bayesian Score: The standard Laplacian-modified Bayesian score.

Mahalanobis Distance: The Mahalanobis distance (MD) is the distance to the center of the training data. The larger the MD, the less trustworthy the prediction.

Mahalanobis Distance p-value: The p-value gives the fraction of training data with an MD greater than or equal to the one for the given sample, assuming normally distributed data. The smaller the p-value, the less trustworthy the prediction. For highly non-normal X properties (e.g., fingerprints), the MD p-value is wildly inaccurate.

## Structural Similar Compounds

| Name               | Niclosamide                                                         | Indapamide                                                          | Mebendazole                                                         |
|--------------------|---------------------------------------------------------------------|---------------------------------------------------------------------|---------------------------------------------------------------------|
| Structure          |                                                                     |                                                                     |                                                                     |
| Actual Endpoint    | Non-Carcinogen                                                      | Non-Carcinogen                                                      | Non-Carcinogen                                                      |
| Predicted Endpoint | Non-Carcinogen                                                      | Non-Carcinogen                                                      | Non-Carcinogen                                                      |
| Distance           | 0.556                                                               | 0.567                                                               | 0.575                                                               |
| Reference          | US FDA (Centre for Drug Eval.& Res./Off. Testing & Res.) Sept. 1997 | US FDA (Centre for Drug Eval.& Res./Off. Testing & Res.) Sept. 1997 | US FDA (Centre for Drug Eval.& Res./Off. Testing & Res.) Sept. 1997 |

## Model Applicability

Unknown features are fingerprint features in the query molecule, but not found or appearing too infrequently in the training set.

1. All properties and OPS components are within expected ranges.

## Feature Contribution

### Top features for positive contribution

| Fingerprint | Bit/Smiles | Feature Structure | Score | Carcinogen in training set |
|-------------|------------|-------------------|-------|----------------------------|
| FCFP_6      | -885461129 |                   | 0.547 | 3 out of 5                 |

|                                        |             |                                                                                                                                                    |        |                            |
|----------------------------------------|-------------|----------------------------------------------------------------------------------------------------------------------------------------------------|--------|----------------------------|
| FCFP_6                                 | 1294344583  | 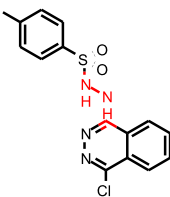<br>[*]NN[c](:[*]):[*]                                           | 0.517  | 2 out of 3                 |
| FCFP_6                                 | -387072142  | <br>[*][c](:[*]):[c]1:[cH]<br>]:[cH]:[cH]:[cH]:[c]<br>:1:[*]    | 0.477  | 4 out of 8                 |
| Top Features for negative contribution |             |                                                                                                                                                    |        |                            |
| Fingerprint                            | Bit/Smiles  | Feature Structure                                                                                                                                  | Score  | Carcinogen in training set |
| FCFP_6                                 | -1773728142 | <br>C[c]1:[cH]:[cH]:[*]:[cH]:[cH]:1                             | -1.29  | 0 out of 10                |
| FCFP_6                                 | 632767364   | <br>[*]S(=[*])(=[*])[c]1:<br>[cH]:[cH]:[c](C):[cH]<br>]:[cH]:1 | -1.04  | 0 out of 7                 |
| FCFP_6                                 | 2109043264  | <br>[*][c]1:[cH]:[cH]:[c]<br>(C):[cH]:[cH]:1                  | -0.947 | 0 out of 6                 |

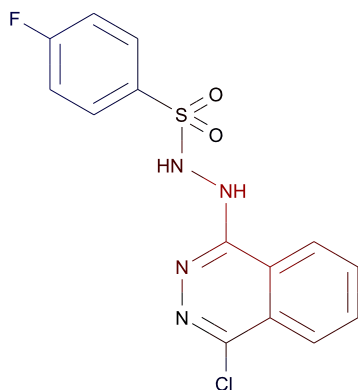

$C_{14}H_{10}ClFN_4O_2S$

Molecular Weight: 352.7712

ALogP: 3.248

Rotatable Bonds: 4

Acceptors: 5

Donors: 2

## Model Prediction

Prediction: Carcinogen

Probability: 0.344

Enrichment: 1.17

Bayesian Score: 1.32

Mahalanobis Distance: 10.5

Mahalanobis Distance p-value: 0.189

Prediction: Positive if the Bayesian score is above the estimated best cutoff value from minimizing the false positive and false negative rate.

Probability: The estimated probability that the sample is in the positive category. This assumes that the Bayesian score follows a normal distribution and is different from the prediction using a cutoff.

Enrichment: An estimate of enrichment, that is, the increased likelihood (versus random) of this sample being in the category.

Bayesian Score: The standard Laplacian-modified Bayesian score.

Mahalanobis Distance: The Mahalanobis distance (MD) is the distance to the center of the training data. The larger the MD, the less trustworthy the prediction.

Mahalanobis Distance p-value: The p-value gives the fraction of training data with an MD greater than or equal to the one for the given sample, assuming normally distributed data. The smaller the p-value, the less trustworthy the prediction. For highly non-normal X properties (e.g., fingerprints), the MD p-value is wildly inaccurate.

## Structural Similar Compounds

| Name               | Niclosamide                                                         | Indapamide                                                          | Mebendazole                                                         |
|--------------------|---------------------------------------------------------------------|---------------------------------------------------------------------|---------------------------------------------------------------------|
| Structure          |                                                                     |                                                                     |                                                                     |
| Actual Endpoint    | Non-Carcinogen                                                      | Non-Carcinogen                                                      | Non-Carcinogen                                                      |
| Predicted Endpoint | Non-Carcinogen                                                      | Non-Carcinogen                                                      | Non-Carcinogen                                                      |
| Distance           | 0.539                                                               | 0.539                                                               | 0.576                                                               |
| Reference          | US FDA (Centre for Drug Eval.& Res./Off. Testing & Res.) Sept. 1997 | US FDA (Centre for Drug Eval.& Res./Off. Testing & Res.) Sept. 1997 | US FDA (Centre for Drug Eval.& Res./Off. Testing & Res.) Sept. 1997 |

## Model Applicability

Unknown features are fingerprint features in the query molecule, but not found or appearing too infrequently in the training set.

1. All properties and OPS components are within expected ranges.

## Feature Contribution

### Top features for positive contribution

| Fingerprint | Bit/Smiles | Feature Structure | Score | Carcinogen in training set |
|-------------|------------|-------------------|-------|----------------------------|
| FCFP_6      | -885461129 |                   | 0.547 | 3 out of 5                 |

| FCFP_6                                 | 1294344583  | 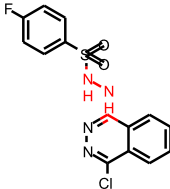<br><chem>[*]NN[c](:[*]):[*]</chem>                              | 0.517  | 2 out of 3                 |
|----------------------------------------|-------------|-----------------------------------------------------------------------------------------------------------------------------------------------------|--------|----------------------------|
| FCFP_6                                 | -387072142  | <br><chem>[*][c](:[*]):[c]F:[cH]:[cH]:[cH]:[cH]:[c]:1:[*]</chem> | 0.477  | 4 out of 8                 |
| Top Features for negative contribution |             |                                                                                                                                                     |        |                            |
| Fingerprint                            | Bit/Smiles  | Feature Structure                                                                                                                                   | Score  | Carcinogen in training set |
| FCFP_6                                 | 551850122   | <br><chem>[*][c]1:[*]:[c]([*]):[c](F):[cH]:[cH]:1</chem>         | -0.433 | 8 out of 49                |
| FCFP_6                                 | -1374812327 | <br><chem>[*]:n:[c](Cl):[c](:[*]):[*]</chem>                    | -0.423 | 0 out of 2                 |
| FCFP_6                                 | 71476542    | <br><chem>[*]:[c](:[*])Cl</chem>                               | -0.406 | 10 out of 59               |

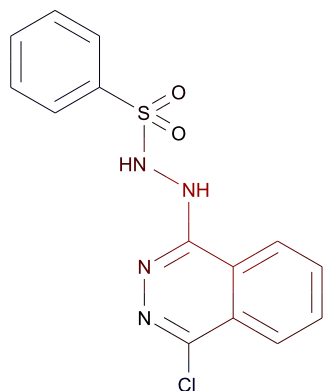

$C_{14}H_{11}ClN_4O_2S$

Molecular Weight: 334.78073

ALogP: 3.043

Rotatable Bonds: 4

Acceptors: 5

Donors: 2

## Model Prediction

Prediction: Carcinogen

Probability: 0.322

Enrichment: 1.09

Bayesian Score: 0.569

Mahalanobis Distance: 19.8

Mahalanobis Distance p-value: 2.3e-018

Prediction: Positive if the Bayesian score is above the estimated best cutoff value from minimizing the false positive and false negative rate.

Probability: The estimated probability that the sample is in the positive category. This assumes that the Bayesian score follows a normal distribution and is different from the prediction using a cutoff.

Enrichment: An estimate of enrichment, that is, the increased likelihood (versus random) of this sample being in the category.

Bayesian Score: The standard Laplacian-modified Bayesian score.

Mahalanobis Distance: The Mahalanobis distance (MD) is the distance to the center of the training data. The larger the MD, the less trustworthy the prediction.

Mahalanobis Distance p-value: The p-value gives the fraction of training data with an MD greater than or equal to the one for the given sample, assuming normally distributed data. The smaller the p-value, the less trustworthy the prediction. For highly non-normal X properties (e.g., fingerprints), the MD p-value is wildly inaccurate.

## Structural Similar Compounds

| Name               | Mebendazole                                                         | Indapamide                                                          | Niclosamide                                                         |
|--------------------|---------------------------------------------------------------------|---------------------------------------------------------------------|---------------------------------------------------------------------|
| Structure          |                                                                     |                                                                     |                                                                     |
| Actual Endpoint    | Non-Carcinogen                                                      | Non-Carcinogen                                                      | Non-Carcinogen                                                      |
| Predicted Endpoint | Non-Carcinogen                                                      | Non-Carcinogen                                                      | Non-Carcinogen                                                      |
| Distance           | 0.542                                                               | 0.547                                                               | 0.554                                                               |
| Reference          | US FDA (Centre for Drug Eval.& Res./Off. Testing & Res.) Sept. 1997 | US FDA (Centre for Drug Eval.& Res./Off. Testing & Res.) Sept. 1997 | US FDA (Centre for Drug Eval.& Res./Off. Testing & Res.) Sept. 1997 |

## Model Applicability

Unknown features are fingerprint features in the query molecule, but not found or appearing too infrequently in the training set.

1. All properties and OPS components are within expected ranges.

## Feature Contribution

### Top features for positive contribution

| Fingerprint | Bit/Smiles | Feature Structure   | Score | Carcinogen in training set |
|-------------|------------|---------------------|-------|----------------------------|
| FCFP_6      | -885461129 | <br>[*]NNC(=[*])[*] | 0.547 | 3 out of 5                 |

|                                        |             |                                                                                                                                          |        |                            |
|----------------------------------------|-------------|------------------------------------------------------------------------------------------------------------------------------------------|--------|----------------------------|
| FCFP_6                                 | 1294344583  | 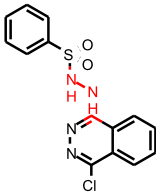<br>[*]NN[c](:[*]):[*]                                | 0.517  | 2 out of 3                 |
| FCFP_6                                 | -387072142  | <br>[*][c](:[*]):[c]1:[cH]:[cH]:[cH]:[cH]:[c]:1:[*]   | 0.477  | 4 out of 8                 |
| Top Features for negative contribution |             |                                                                                                                                          |        |                            |
| Fingerprint                            | Bit/Smiles  | Feature Structure                                                                                                                        | Score  | Carcinogen in training set |
| FCFP_6                                 | -1374812327 | <br>[*]:n:[c](Cl):[c](:[*]):[*]                       | -0.423 | 0 out of 2                 |
| FCFP_6                                 | 71476542    | <br>[*]:[c](:[*])Cl                                  | -0.406 | 10 out of 59               |
| FCFP_6                                 | -1698724694 | <br>[*]S(=[*])(=[*])[c]1:[cH]:[cH]:[cH]:[cH]:[cH]:1 | -0.22  | 15 out of 72               |

# Thalidomide

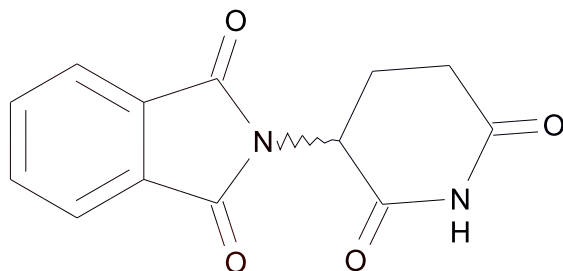

C<sub>13</sub>H<sub>10</sub>N<sub>2</sub>O<sub>4</sub>

Molecular Weight: 258.22949

ALogP: 9.7e-002

Rotatable Bonds: 1

Acceptors: 4

Donors: 1

## Model Prediction

**Prediction: Carcinogen**

Probability: 0.317

Enrichment: 1.08

Bayesian Score: 0.389

Mahalanobis Distance: 8.54

Mahalanobis Distance p-value: 0.928

Prediction: Positive if the Bayesian score is above the estimated best cutoff value from minimizing the false positive and false negative rate.

Probability: The estimated probability that the sample is in the positive category. This assumes that the Bayesian score follows a normal distribution and is different from the prediction using a cutoff.

Enrichment: An estimate of enrichment, that is, the increased likelihood (versus random) of this sample being in the category.

Bayesian Score: The standard Laplacian-modified Bayesian score.

Mahalanobis Distance: The Mahalanobis distance (MD) is the distance to the center of the training data. The larger the MD, the less trustworthy the prediction.

Mahalanobis Distance p-value: The p-value gives the fraction of training data with an MD greater than or equal to the one for the given sample, assuming normally distributed data. The smaller the p-value, the less trustworthy the prediction. For highly non-normal X properties (e.g., fingerprints), the MD p-value is wildly inaccurate.

# TOPKAT\_Mouse\_Male\_FDA\_None\_vs\_Carcinogen

## Structural Similar Compounds

| Name               | Milrinone                                                           | Phenobarbital                                                       | Dapsone                                                             |
|--------------------|---------------------------------------------------------------------|---------------------------------------------------------------------|---------------------------------------------------------------------|
| Structure          |                                                                     |                                                                     |                                                                     |
| Actual Endpoint    | Non-Carcinogen                                                      | Carcinogen                                                          | Non-Carcinogen                                                      |
| Predicted Endpoint | Carcinogen                                                          | Carcinogen                                                          | Carcinogen                                                          |
| Distance           | 0.575                                                               | 0.587                                                               | 0.618                                                               |
| Reference          | US FDA (Centre for Drug Eval.& Res./Off. Testing & Res.) Sept. 1997 | US FDA (Centre for Drug Eval.& Res./Off. Testing & Res.) Sept. 1997 | US FDA (Centre for Drug Eval.& Res./Off. Testing & Res.) Sept. 1997 |

## Model Applicability

Unknown features are fingerprint features in the query molecule, but not found or appearing too infrequently in the training set.

1. All properties and OPS components are within expected ranges.

## Feature Contribution

### Top features for positive contribution

| Fingerprint | Bit/Smiles | Feature Structure                                         | Score | Carcinogen in training set |
|-------------|------------|-----------------------------------------------------------|-------|----------------------------|
| FCFP_6      | 2139882011 | <br>[*]N1C(=[*])[c]2:[cH]<br>:[*]:[cH]:[cH]:[c]:2<br>C1=O | 0.46  | 1 out of 1                 |

| FCFP_6                                 | 1393189956  | 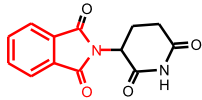<br><chem>[*]N1C(=[*])[c]2:[cH]:[cH]:[cH]:[cH]:[c]:2C1=O</chem> | 0.46   | 1 out of 1                 |
|----------------------------------------|-------------|----------------------------------------------------------------------------------------------------------------------------------------------------|--------|----------------------------|
| FCFP_6                                 | 566058135   | <br><chem>[*]CC(=O)N[*]</chem>                                  | 0.447  | 17 out of 40               |
| Top Features for negative contribution |             |                                                                                                                                                    |        |                            |
| Fingerprint                            | Bit/Smiles  | Feature Structure                                                                                                                                  | Score  | Carcinogen in training set |
| FCFP_6                                 | -1553874037 | <br><chem>[*]C([*])N1C(=[*])[*]:[*]C1=[*]</chem>                | -0.45  | 5 out of 32                |
| FCFP_6                                 | -1043310069 | <br><chem>[*]CC(N([*])[*])C(=[*])[*]</chem>                   | -0.406 | 10 out of 59               |
| FCFP_6                                 | -228300541  | <br><chem>[*]C1[*]NC(=O)CC1</chem>                            | -0.233 | 0 out of 1                 |

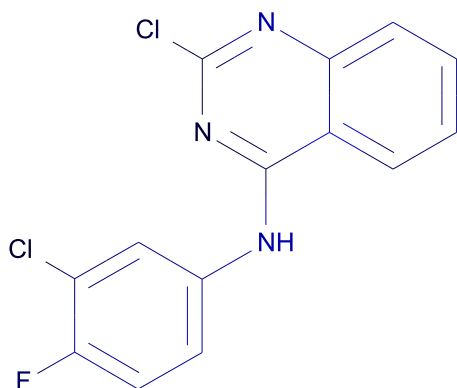

$C_{14}H_8Cl_2FN_3$

Molecular Weight: 308.13782

ALogP: 5.202

Rotatable Bonds: 2

Acceptors: 3

Donors: 1

## Model Prediction

Prediction: Single-Carcinogen

Probability: 0.147

Enrichment: 0.49

Bayesian Score: -10.8

Mahalanobis Distance: 13

Mahalanobis Distance p-value: 9.61e-005

Prediction: Positive if the Bayesian score is above the estimated best cutoff value from minimizing the false positive and false negative rate.

Probability: The estimated probability that the sample is in the positive category. This assumes that the Bayesian score follows a normal distribution and is different from the prediction using a cutoff.

Enrichment: An estimate of enrichment, that is, the increased likelihood (versus random) of this sample being in the category.

Bayesian Score: The standard Laplacian-modified Bayesian score.

Mahalanobis Distance: The Mahalanobis distance (MD) is the distance to the center of the training data. The larger the MD, the less trustworthy the prediction.

Mahalanobis Distance p-value: The p-value gives the fraction of training data with an MD greater than or equal to the one for the given sample, assuming normally distributed data. The smaller the p-value, the less trustworthy the prediction. For highly non-normal X properties (e.g., fingerprints), the MD p-value is wildly inaccurate.

## Structural Similar Compounds

| Name               | Nafenopin                                                           | Mestranol                                                           | Levonorgestrel                                                      |
|--------------------|---------------------------------------------------------------------|---------------------------------------------------------------------|---------------------------------------------------------------------|
| Structure          |                                                                     |                                                                     |                                                                     |
| Actual Endpoint    | Single-Carcinogen                                                   | Multiple-Carcinogen                                                 | Single-Carcinogen                                                   |
| Predicted Endpoint | Single-Carcinogen                                                   | Multiple-Carcinogen                                                 | Multiple-Carcinogen                                                 |
| Distance           | 0.622                                                               | 0.623                                                               | 0.625                                                               |
| Reference          | US FDA (Centre for Drug Eval.& Res./Off. Testing & Res.) Sept. 1997 | US FDA (Centre for Drug Eval.& Res./Off. Testing & Res.) Sept. 1997 | US FDA (Centre for Drug Eval.& Res./Off. Testing & Res.) Sept. 1997 |

## Model Applicability

Unknown features are fingerprint features in the query molecule, but not found or appearing too infrequently in the training set.

- OPS PC7 out of range. Value: -4.0266. Training min, max, SD, explained variance: -3.9478, 3.0766, 1.527, 0.0435.
- Unknown FCFP\_2 feature: -1374842118: [\*]:n:[c](Cl):n:[\*]
- Unknown FCFP\_2 feature: 1293778554: [\*]:[c](:[\*])N[c](:[\*]):[\*]

## Feature Contribution

| Top Features for negative contribution |             |                                   |       |                                     |
|----------------------------------------|-------------|-----------------------------------|-------|-------------------------------------|
| Fingerprint                            | Bit/Smiles  | Feature Structure                 | Score | Multiple-Carcinogen in training set |
| FCFP_12                                | -1151884458 | <br>[*]N[c](:n:[*]):[c](:[*]):[*] | -1.11 | 0 out of 6                          |

|         |           |                                                                                                                                        |        |             |
|---------|-----------|----------------------------------------------------------------------------------------------------------------------------------------|--------|-------------|
| FCFP_12 | 590925877 | 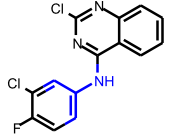<br><chem>[*]N[c](:[cH]:[*]):[cH]:[*]</chem>        | -0.998 | 1 out of 13 |
| FCFP_12 | 178336375 | <br><chem>[*]:[cH]:[c](:n:[*]):[c](:[*]):[*]</chem> | -0.994 | 0 out of 5  |

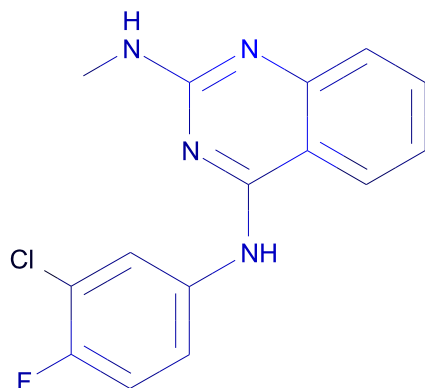

$C_{15}H_{12}ClFN_4$

Molecular Weight: 302.73398

ALogP: 4.677

Rotatable Bonds: 3

Acceptors: 4

Donors: 2

## Model Prediction

Prediction: Single-Carcinogen

Probability: 0.143

Enrichment: 0.474

Bayesian Score: -14.3

Mahalanobis Distance: 11.9

Mahalanobis Distance p-value: 0.000707

Prediction: Positive if the Bayesian score is above the estimated best cutoff value from minimizing the false positive and false negative rate.

Probability: The estimated probability that the sample is in the positive category. This assumes that the Bayesian score follows a normal distribution and is different from the prediction using a cutoff.

Enrichment: An estimate of enrichment, that is, the increased likelihood (versus random) of this sample being in the category.

Bayesian Score: The standard Laplacian-modified Bayesian score.

Mahalanobis Distance: The Mahalanobis distance (MD) is the distance to the center of the training data. The larger the MD, the less trustworthy the prediction.

Mahalanobis Distance p-value: The p-value gives the fraction of training data with an MD greater than or equal to the one for the given sample, assuming normally distributed data. The smaller the p-value, the less trustworthy the prediction. For highly non-normal X properties (e.g., fingerprints), the MD p-value is wildly inaccurate.

## Structural Similar Compounds

| Name               | Phenolphthalein                                                     | Oxazepam                                                            | Nafenopin                                                           |
|--------------------|---------------------------------------------------------------------|---------------------------------------------------------------------|---------------------------------------------------------------------|
| Structure          |                                                                     |                                                                     |                                                                     |
| Actual Endpoint    | Multiple-Carcinogen                                                 | Single-Carcinogen                                                   | Single-Carcinogen                                                   |
| Predicted Endpoint | Multiple-Carcinogen                                                 | Single-Carcinogen                                                   | Single-Carcinogen                                                   |
| Distance           | 0.593                                                               | 0.684                                                               | 0.710                                                               |
| Reference          | US FDA (Centre for Drug Eval.& Res./Off. Testing & Res.) Sept. 1997 | US FDA (Centre for Drug Eval.& Res./Off. Testing & Res.) Sept. 1997 | US FDA (Centre for Drug Eval.& Res./Off. Testing & Res.) Sept. 1997 |

## Model Applicability

Unknown features are fingerprint features in the query molecule, but not found or appearing too infrequently in the training set.

1. All properties and OPS components are within expected ranges.
2. Unknown FCFP\_2 feature: 1293778554: [\*]:[c](:[\*])N[c](:[\*]):[\*]

## Feature Contribution

### Top Features for negative contribution

| Fingerprint | Bit/Smiles | Feature Structure   | Score | Multiple-Carcinogen in training set |
|-------------|------------|---------------------|-------|-------------------------------------|
| FCFP_12     | 1294255210 | <br>[*]:[c](:[*])NC | -1.63 | 0 out of 12                         |

|         |             |                                                                                                                                                                                           |        |             |
|---------|-------------|-------------------------------------------------------------------------------------------------------------------------------------------------------------------------------------------|--------|-------------|
| FCFP_12 | -1151884458 | 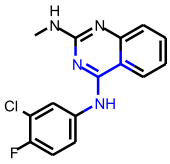<br><chem>CN1C=NC2=CC=CC=C2C(=N1)Nc3ccc(F)c(Cl)c3</chem><br><chem>[*]N[c](:n:[*]):[c](:[*]):[*]</chem> | -1.11  | 0 out of 6  |
| FCFP_12 | 590925877   | <br><chem>CN1C=NC2=CC=CC=C2C(=N1)Nc3ccc(F)c(Cl)c3</chem><br><chem>[*]N[c](:[cH]:[*]):[cH]:[*]</chem>   | -0.998 | 1 out of 13 |

7b

## TOPKAT\_Mouse\_Male\_FDA\_Single\_vs\_Multiple

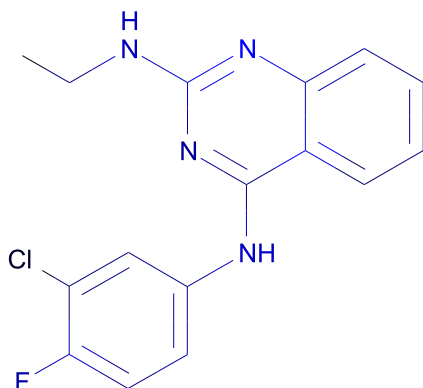C<sub>16</sub>H<sub>14</sub>ClFN<sub>4</sub>

Molecular Weight: 316.76056

ALogP: 5.025

Rotatable Bonds: 4

Acceptors: 4

Donors: 2

**Model Prediction**

Prediction: Single-Carcinogen

Probability: 0.138

Enrichment: 0.46

Bayesian Score: -14.8

Mahalanobis Distance: 15

Mahalanobis Distance p-value: 2.71e-006

Prediction: Positive if the Bayesian score is above the estimated best cutoff value from minimizing the false positive and false negative rate.

Probability: The estimated probability that the sample is in the positive category. This assumes that the Bayesian score follows a normal distribution and is different from the prediction using a cutoff.

Enrichment: An estimate of enrichment, that is, the increased likelihood (versus random) of this sample being in the category.

Bayesian Score: The standard Laplacian-modified Bayesian score.

Mahalanobis Distance: The Mahalanobis distance (MD) is the distance to the center of the training data. The larger the MD, the less trustworthy the prediction.

Mahalanobis Distance p-value: The p-value gives the fraction of training data with an MD greater than or equal to the one for the given sample, assuming normally distributed data. The smaller the p-value, the less trustworthy the prediction. For highly non-normal X properties (e.g., fingerprints), the MD p-value is wildly inaccurate.

**Structural Similar Compounds**

| Name               | Phenolphthalein                                                     | Nafenopin                                                           | Diethylstilbestrol                                                  |
|--------------------|---------------------------------------------------------------------|---------------------------------------------------------------------|---------------------------------------------------------------------|
| Structure          |                                                                     |                                                                     |                                                                     |
| Actual Endpoint    | Multiple-Carcinogen                                                 | Single-Carcinogen                                                   | Single-Carcinogen                                                   |
| Predicted Endpoint | Multiple-Carcinogen                                                 | Single-Carcinogen                                                   | Single-Carcinogen                                                   |
| Distance           | 0.657                                                               | 0.695                                                               | 0.702                                                               |
| Reference          | US FDA (Centre for Drug Eval.& Res./Off. Testing & Res.) Sept. 1997 | US FDA (Centre for Drug Eval.& Res./Off. Testing & Res.) Sept. 1997 | US FDA (Centre for Drug Eval.& Res./Off. Testing & Res.) Sept. 1997 |

**Model Applicability**

Unknown features are fingerprint features in the query molecule, but not found or appearing too infrequently in the training set.

1. All properties and OPS components are within expected ranges.
2. Unknown FCFP\_2 feature: 1293778554: [\*]:[c](:[\*])N[c](:[\*]):[\*]

**Feature Contribution****Top features for positive contribution**

| Fingerprint | Bit/Smiles | Feature Structure | Score  | Multiple-Carcinogen in training set |
|-------------|------------|-------------------|--------|-------------------------------------|
| FCFP_12     | 136597326  | <br>[*]CC         | 0.0722 | 18 out of 49                        |

**Top Features for negative contribution**

| Fingerprint | Bit/Smiles | Feature Structure                                                                                                                 | Score  | Multiple-Carcinogen in training set |
|-------------|------------|-----------------------------------------------------------------------------------------------------------------------------------|--------|-------------------------------------|
| FCFP_12     | 1294255210 | 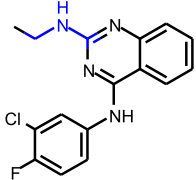<br><chem>[*]:[c](:[*])NC</chem>               | -1.63  | 0 out of 12                         |
| FCFP_12     | 1151884458 | <br><chem>[*]N[c](:n:[*]):[c](:[*]):[*]</chem> | -1.11  | 0 out of 6                          |
| FCFP_12     | 590925877  | <br><chem>[*]N[c](:[cH]:[*]):[cH]:[*]</chem>   | -0.998 | 1 out of 13                         |

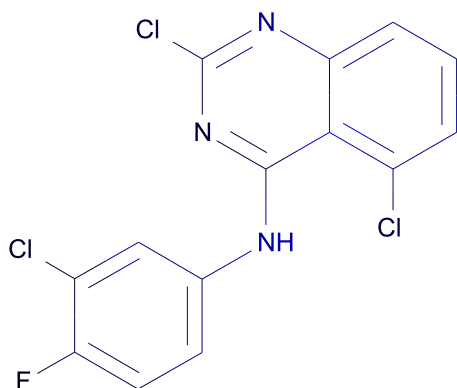

$C_{14}H_7Cl_3FN_3$

Molecular Weight: 342.58288

ALogP: 5.867

Rotatable Bonds: 2

Acceptors: 3

Donors: 1

## Model Prediction

Prediction: Single-Carcinogen

Probability: 0.147

Enrichment: 0.488

Bayesian Score: -10.6

Mahalanobis Distance: 13.2

Mahalanobis Distance p-value: 6.75e-005

Prediction: Positive if the Bayesian score is above the estimated best cutoff value from minimizing the false positive and false negative rate.

Probability: The estimated probability that the sample is in the positive category. This assumes that the Bayesian score follows a normal distribution and is different from the prediction using a cutoff.

Enrichment: An estimate of enrichment, that is, the increased likelihood (versus random) of this sample being in the category.

Bayesian Score: The standard Laplacian-modified Bayesian score.

Mahalanobis Distance: The Mahalanobis distance (MD) is the distance to the center of the training data. The larger the MD, the less trustworthy the prediction.

Mahalanobis Distance p-value: The p-value gives the fraction of training data with an MD greater than or equal to the one for the given sample, assuming normally distributed data. The smaller the p-value, the less trustworthy the prediction. For highly non-normal X properties (e.g., fingerprints), the MD p-value is wildly inaccurate.

## Structural Similar Compounds

| Name               | Mestranol                                                           | Nafenopin                                                           | Levonorgestrel                                                      |
|--------------------|---------------------------------------------------------------------|---------------------------------------------------------------------|---------------------------------------------------------------------|
| Structure          |                                                                     |                                                                     |                                                                     |
| Actual Endpoint    | Multiple-Carcinogen                                                 | Single-Carcinogen                                                   | Single-Carcinogen                                                   |
| Predicted Endpoint | Multiple-Carcinogen                                                 | Single-Carcinogen                                                   | Multiple-Carcinogen                                                 |
| Distance           | 0.647                                                               | 0.654                                                               | 0.658                                                               |
| Reference          | US FDA (Centre for Drug Eval.& Res./Off. Testing & Res.) Sept. 1997 | US FDA (Centre for Drug Eval.& Res./Off. Testing & Res.) Sept. 1997 | US FDA (Centre for Drug Eval.& Res./Off. Testing & Res.) Sept. 1997 |

## Model Applicability

Unknown features are fingerprint features in the query molecule, but not found or appearing too infrequently in the training set.

- OPS PC7 out of range. Value: -4.1247. Training min, max, SD, explained variance: -3.9478, 3.0766, 1.527, 0.0435.
- Unknown FCFP\_2 feature: -1374842118: [\*]:n:[c](Cl):n:[\*]
- Unknown FCFP\_2 feature: 1293778554: [\*]:[c](:[\*])N[c](:[\*]):[\*]

## Feature Contribution

| Top Features for negative contribution |             |                                   |       |                                     |
|----------------------------------------|-------------|-----------------------------------|-------|-------------------------------------|
| Fingerprint                            | Bit/Smiles  | Feature Structure                 | Score | Multiple-Carcinogen in training set |
| FCFP_12                                | -1151884458 | <br>[*]N[c](:n:[*]):[c](:[*]):[*] | -1.11 | 0 out of 6                          |

|         |           |                                                                                                                                        |        |             |
|---------|-----------|----------------------------------------------------------------------------------------------------------------------------------------|--------|-------------|
| FCFP_12 | 590925877 | 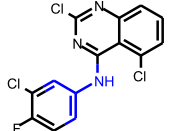<br><chem>[*]N[c](:[cH]:[*]):[cH]:[*]</chem>        | -0.998 | 1 out of 13 |
| FCFP_12 | 178336375 | <br><chem>[*]:[cH]:[c](:n:[*]):[c](:[*]):[*]</chem> | -0.994 | 0 out of 5  |

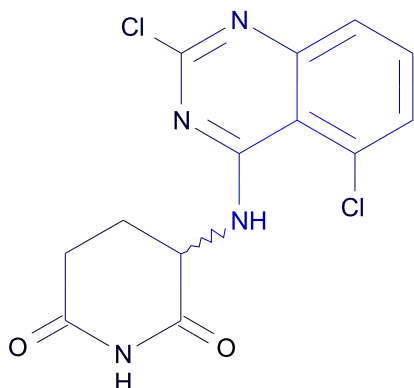
 $C_{13}H_{10}Cl_2N_4O_2$ 

Molecular Weight: 325.15009

ALogP: 2.49

Rotatable Bonds: 2

Acceptors: 5

Donors: 2

## Model Prediction

Prediction: Single-Carcinogen

Probability: 0.149

Enrichment: 0.495

Bayesian Score: -13.6

Mahalanobis Distance: 11.2

Mahalanobis Distance p-value: 0.00242

Prediction: Positive if the Bayesian score is above the estimated best cutoff value from minimizing the false positive and false negative rate.

Probability: The estimated probability that the sample is in the positive category. This assumes that the Bayesian score follows a normal distribution and is different from the prediction using a cutoff.

Enrichment: An estimate of enrichment, that is, the increased likelihood (versus random) of this sample being in the category.

Bayesian Score: The standard Laplacian-modified Bayesian score.

Mahalanobis Distance: The Mahalanobis distance (MD) is the distance to the center of the training data. The larger the MD, the less trustworthy the prediction.

Mahalanobis Distance p-value: The p-value gives the fraction of training data with an MD greater than or equal to the one for the given sample, assuming normally distributed data. The smaller the p-value, the less trustworthy the prediction. For highly non-normal X properties (e.g., fingerprints), the MD p-value is wildly inaccurate.

## Structural Similar Compounds

| Name               | Phenolphthalein                                                     | Sulfamethazine                                                      | Oxazepam                                                            |
|--------------------|---------------------------------------------------------------------|---------------------------------------------------------------------|---------------------------------------------------------------------|
| Structure          |                                                                     |                                                                     |                                                                     |
| Actual Endpoint    | Multiple-Carcinogen                                                 | Single-Carcinogen                                                   | Single-Carcinogen                                                   |
| Predicted Endpoint | Multiple-Carcinogen                                                 | Single-Carcinogen                                                   | Single-Carcinogen                                                   |
| Distance           | 0.652                                                               | 0.657                                                               | 0.678                                                               |
| Reference          | US FDA (Centre for Drug Eval.& Res./Off. Testing & Res.) Sept. 1997 | US FDA (Centre for Drug Eval.& Res./Off. Testing & Res.) Sept. 1997 | US FDA (Centre for Drug Eval.& Res./Off. Testing & Res.) Sept. 1997 |

## Model Applicability

Unknown features are fingerprint features in the query molecule, but not found or appearing too infrequently in the training set.

1. All properties and OPS components are within expected ranges.
2. Unknown FCFP\_2 feature: -1374842118: [\*]:n:[c](Cl):n:[\*]

## Feature Contribution

### Top features for positive contribution

| Fingerprint | Bit/Smiles  | Feature Structure       | Score  | Multiple-Carcinogen in training set |
|-------------|-------------|-------------------------|--------|-------------------------------------|
| FCFP_12     | -1043250487 | <br>[*]CC(N[*])C(=O)[*] | 0.0691 | 7 out of 19                         |

### Top Features for negative contribution

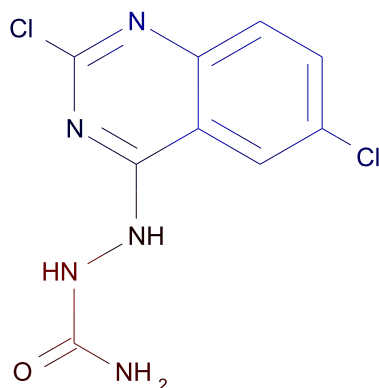

$C_9H_7Cl_2N_5O$

Molecular Weight: 272.09078

ALogP: 2.379

Rotatable Bonds: 2

Acceptors: 4

Donors: 3

## Model Prediction

Prediction: Single-Carcinogen

Probability: 0.151

Enrichment: 0.5

Bayesian Score: -7.23

Mahalanobis Distance: 11.7

Mahalanobis Distance p-value: 0.00105

Prediction: Positive if the Bayesian score is above the estimated best cutoff value from minimizing the false positive and false negative rate.

Probability: The estimated probability that the sample is in the positive category. This assumes that the Bayesian score follows a normal distribution and is different from the prediction using a cutoff.

Enrichment: An estimate of enrichment, that is, the increased likelihood (versus random) of this sample being in the category.

Bayesian Score: The standard Laplacian-modified Bayesian score.

Mahalanobis Distance: The Mahalanobis distance (MD) is the distance to the center of the training data. The larger the MD, the less trustworthy the prediction.

Mahalanobis Distance p-value: The p-value gives the fraction of training data with an MD greater than or equal to the one for the given sample, assuming normally distributed data. The smaller the p-value, the less trustworthy the prediction. For highly non-normal X properties (e.g., fingerprints), the MD p-value is wildly inaccurate.

## Structural Similar Compounds

| Name               | Phenobarbital                                                       | Danthron                                                            | Sulfamethazine                                                      |
|--------------------|---------------------------------------------------------------------|---------------------------------------------------------------------|---------------------------------------------------------------------|
| Structure          |                                                                     |                                                                     |                                                                     |
| Actual Endpoint    | Multiple-Carcinogen                                                 | Single-Carcinogen                                                   | Single-Carcinogen                                                   |
| Predicted Endpoint | Multiple-Carcinogen                                                 | Single-Carcinogen                                                   | Single-Carcinogen                                                   |
| Distance           | 0.706                                                               | 0.708                                                               | 0.711                                                               |
| Reference          | US FDA (Centre for Drug Eval.& Res./Off. Testing & Res.) Sept. 1997 | US FDA (Centre for Drug Eval.& Res./Off. Testing & Res.) Sept. 1997 | US FDA (Centre for Drug Eval.& Res./Off. Testing & Res.) Sept. 1997 |

## Model Applicability

Unknown features are fingerprint features in the query molecule, but not found or appearing too infrequently in the training set.

1. All properties and OPS components are within expected ranges.
2. Unknown FCFP\_2 feature: -1374842118: [\*]:n:[c](Cl):n:[\*]

## Feature Contribution

### Top features for positive contribution

| Fingerprint | Bit/Smiles | Feature Structure                | Score | Multiple-Carcinogen in training set |
|-------------|------------|----------------------------------|-------|-------------------------------------|
| FCFP_12     | -885461129 | <br><chem>[*]NNC(=[*])[*]</chem> | 0.683 | 3 out of 3                          |

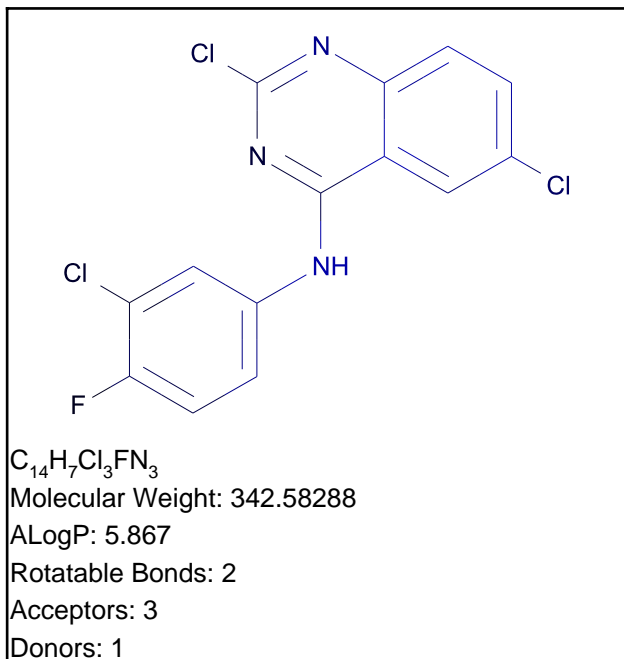

### Model Prediction

Prediction: Single-Carcinogen

Probability: 0.147

Enrichment: 0.488

Bayesian Score: -10.5

Mahalanobis Distance: 12

Mahalanobis Distance p-value: 0.000594

Prediction: Positive if the Bayesian score is above the estimated best cutoff value from minimizing the false positive and false negative rate.

Probability: The estimated probability that the sample is in the positive category. This assumes that the Bayesian score follows a normal distribution and is different from the prediction using a cutoff.

Enrichment: An estimate of enrichment, that is, the increased likelihood (versus random) of this sample being in the category.

Bayesian Score: The standard Laplacian-modified Bayesian score.

Mahalanobis Distance: The Mahalanobis distance (MD) is the distance to the center of the training data. The larger the MD, the less trustworthy the prediction.

Mahalanobis Distance p-value: The p-value gives the fraction of training data with an MD greater than or equal to the one for the given sample, assuming normally distributed data. The smaller the p-value, the less trustworthy the prediction. For highly non-normal X properties (e.g., fingerprints), the MD p-value is wildly inaccurate.

### Structural Similar Compounds

| Name               | Mestranol                                                                           | Levonorgestrel                                                                      | Nafenopin                                                                           |
|--------------------|-------------------------------------------------------------------------------------|-------------------------------------------------------------------------------------|-------------------------------------------------------------------------------------|
| Structure          | 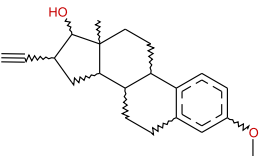 |  |  |
| Actual Endpoint    | Multiple-Carcinogen                                                                 | Single-Carcinogen                                                                   | Single-Carcinogen                                                                   |
| Predicted Endpoint | Multiple-Carcinogen                                                                 | Multiple-Carcinogen                                                                 | Single-Carcinogen                                                                   |
| Distance           | 0.647                                                                               | 0.658                                                                               | 0.659                                                                               |
| Reference          | US FDA (Centre for Drug Eval.& Res./Off. Testing & Res.) Sept. 1997                 | US FDA (Centre for Drug Eval.& Res./Off. Testing & Res.) Sept. 1997                 | US FDA (Centre for Drug Eval.& Res./Off. Testing & Res.) Sept. 1997                 |

### Model Applicability

Unknown features are fingerprint features in the query molecule, but not found or appearing too infrequently in the training set.

- OPS PC7 out of range. Value: -4.4725. Training min, max, SD, explained variance: -3.9478, 3.0766, 1.527, 0.0435.
- Unknown FCFP\_2 feature: -1374842118: [\*]:n:[c](Cl):n:[\*]
- Unknown FCFP\_2 feature: 1293778554: [\*]:[c](:[\*])N[c](:[\*]):[\*]

### Feature Contribution

| Top Features for negative contribution |             |                                                                                                                                     |       |                                     |
|----------------------------------------|-------------|-------------------------------------------------------------------------------------------------------------------------------------|-------|-------------------------------------|
| Fingerprint                            | Bit/Smiles  | Feature Structure                                                                                                                   | Score | Multiple-Carcinogen in training set |
| FCFP_12                                | -1151884458 | 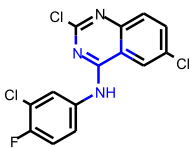<br><chem>[*]N[c](:n:[*]):[c](:[*]):[*]</chem> | -1.11 | 0 out of 6                          |

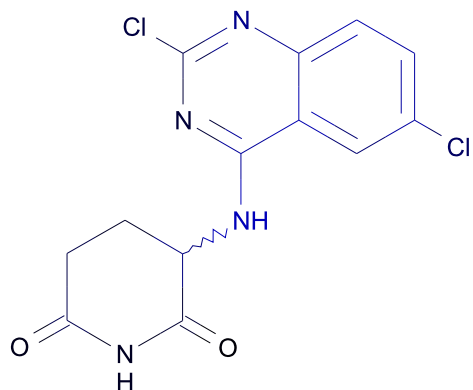
 $C_{13}H_{10}Cl_2N_4O_2$ 

Molecular Weight: 325.15009

ALogP: 2.49

Rotatable Bonds: 2

Acceptors: 5

Donors: 2

## Model Prediction

Prediction: Single-Carcinogen

Probability: 0.149

Enrichment: 0.496

Bayesian Score: -13.6

Mahalanobis Distance: 10.9

Mahalanobis Distance p-value: 0.00447

Prediction: Positive if the Bayesian score is above the estimated best cutoff value from minimizing the false positive and false negative rate.

Probability: The estimated probability that the sample is in the positive category. This assumes that the Bayesian score follows a normal distribution and is different from the prediction using a cutoff.

Enrichment: An estimate of enrichment, that is, the increased likelihood (versus random) of this sample being in the category.

Bayesian Score: The standard Laplacian-modified Bayesian score.

Mahalanobis Distance: The Mahalanobis distance (MD) is the distance to the center of the training data. The larger the MD, the less trustworthy the prediction.

Mahalanobis Distance p-value: The p-value gives the fraction of training data with an MD greater than or equal to the one for the given sample, assuming normally distributed data. The smaller the p-value, the less trustworthy the prediction. For highly non-normal X properties (e.g., fingerprints), the MD p-value is wildly inaccurate.

## Structural Similar Compounds

| Name               | Sulfamethazine                                                      | Phenolphthalein                                                     | Oxazepam                                                            |
|--------------------|---------------------------------------------------------------------|---------------------------------------------------------------------|---------------------------------------------------------------------|
| Structure          |                                                                     |                                                                     |                                                                     |
| Actual Endpoint    | Single-Carcinogen                                                   | Multiple-Carcinogen                                                 | Single-Carcinogen                                                   |
| Predicted Endpoint | Single-Carcinogen                                                   | Multiple-Carcinogen                                                 | Single-Carcinogen                                                   |
| Distance           | 0.657                                                               | 0.657                                                               | 0.679                                                               |
| Reference          | US FDA (Centre for Drug Eval.& Res./Off. Testing & Res.) Sept. 1997 | US FDA (Centre for Drug Eval.& Res./Off. Testing & Res.) Sept. 1997 | US FDA (Centre for Drug Eval.& Res./Off. Testing & Res.) Sept. 1997 |

## Model Applicability

Unknown features are fingerprint features in the query molecule, but not found or appearing too infrequently in the training set.

1. All properties and OPS components are within expected ranges.
2. Unknown FCFP\_2 feature: -1374842118: [\*]:n:[c](Cl):n:[\*]

## Feature Contribution

### Top features for positive contribution

| Fingerprint | Bit/Smiles  | Feature Structure           | Score  | Multiple-Carcinogen in training set |
|-------------|-------------|-----------------------------|--------|-------------------------------------|
| FCFP_12     | -1043250487 | <br>[*]CC(N[*])C(=O)[*])[*] | 0.0691 | 7 out of 19                         |

### Top Features for negative contribution

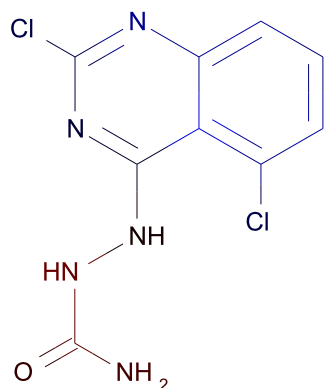

$C_9H_7Cl_2N_5O$

Molecular Weight: 272.09077

ALogP: 2.379

Rotatable Bonds: 2

Acceptors: 4

Donors: 3

## Model Prediction

Prediction: Single-Carcinogen

Probability: 0.15

Enrichment: 0.5

Bayesian Score: -7.27

Mahalanobis Distance: 12.5

Mahalanobis Distance p-value: 0.000231

Prediction: Positive if the Bayesian score is above the estimated best cutoff value from minimizing the false positive and false negative rate.

Probability: The estimated probability that the sample is in the positive category. This assumes that the Bayesian score follows a normal distribution and is different from the prediction using a cutoff.

Enrichment: An estimate of enrichment, that is, the increased likelihood (versus random) of this sample being in the category.

Bayesian Score: The standard Laplacian-modified Bayesian score.

Mahalanobis Distance: The Mahalanobis distance (MD) is the distance to the center of the training data. The larger the MD, the less trustworthy the prediction.

Mahalanobis Distance p-value: The p-value gives the fraction of training data with an MD greater than or equal to the one for the given sample, assuming normally distributed data. The smaller the p-value, the less trustworthy the prediction. For highly non-normal X properties (e.g., fingerprints), the MD p-value is wildly inaccurate.

## Structural Similar Compounds

| Name               | Phenobarbital                                                       | Danthron                                                            | Sulfamethazine                                                      |
|--------------------|---------------------------------------------------------------------|---------------------------------------------------------------------|---------------------------------------------------------------------|
| Structure          |                                                                     |                                                                     |                                                                     |
| Actual Endpoint    | Multiple-Carcinogen                                                 | Single-Carcinogen                                                   | Single-Carcinogen                                                   |
| Predicted Endpoint | Multiple-Carcinogen                                                 | Single-Carcinogen                                                   | Single-Carcinogen                                                   |
| Distance           | 0.698                                                               | 0.700                                                               | 0.711                                                               |
| Reference          | US FDA (Centre for Drug Eval.& Res./Off. Testing & Res.) Sept. 1997 | US FDA (Centre for Drug Eval.& Res./Off. Testing & Res.) Sept. 1997 | US FDA (Centre for Drug Eval.& Res./Off. Testing & Res.) Sept. 1997 |

## Model Applicability

Unknown features are fingerprint features in the query molecule, but not found or appearing too infrequently in the training set.

1. All properties and OPS components are within expected ranges.
2. Unknown FCFP\_2 feature: -1374842118: [\*]:n:[c](Cl):n:[\*]

## Feature Contribution

### Top features for positive contribution

| Fingerprint | Bit/Smiles | Feature Structure            | Score | Multiple-Carcinogen in training set |
|-------------|------------|------------------------------|-------|-------------------------------------|
| FCFP_12     | -885461129 | <br><chem>[*]NNC(=O)N</chem> | 0.683 | 3 out of 3                          |

|                                        |             |                                                                                                                                          |        |                                     |
|----------------------------------------|-------------|------------------------------------------------------------------------------------------------------------------------------------------|--------|-------------------------------------|
| FCFP_12                                | -1995759737 | 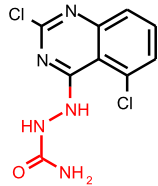<br><chem>[*]NNC(=O)N</chem>                          | 0.4    | 1 out of 1                          |
| FCFP_12                                | 1572236312  | <br><chem>[*]:c(:[*])NNC(=O)N</chem>                  | 0.4    | 1 out of 1                          |
| Top Features for negative contribution |             |                                                                                                                                          |        |                                     |
| Fingerprint                            | Bit/Smiles  | Feature Structure                                                                                                                        | Score  | Multiple-Carcinogen in training set |
| FCFP_12                                | -1151884458 | <br><chem>[*]N[c](:n:[*]):[c](:[*]):[*]</chem>        | -1.11  | 0 out of 6                          |
| FCFP_12                                | 178336375   | <br><chem>[*]:[cH]:[c](:n:[*]):[c](:[*]):[*]</chem> | -0.994 | 0 out of 5                          |
| FCFP_12                                | 367998008   | <br><chem>[*][c](:[*]):[c](F):[cH]:[*]</chem>       | -0.789 | 1 out of 10                         |

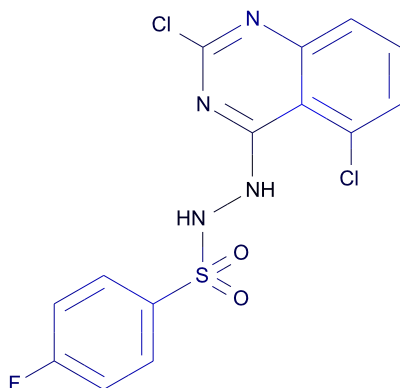

$C_{14}H_9Cl_2FN_4O_2S$

Molecular Weight: 387.21626

ALogP: 4.162

Rotatable Bonds: 4

Acceptors: 5

Donors: 2

## Model Prediction

Prediction: Single-Carcinogen

Probability: 0.15

Enrichment: 0.499

Bayesian Score: -13.5

Mahalanobis Distance: 12.7

Mahalanobis Distance p-value: 0.000165

Prediction: Positive if the Bayesian score is above the estimated best cutoff value from minimizing the false positive and false negative rate.

Probability: The estimated probability that the sample is in the positive category. This assumes that the Bayesian score follows a normal distribution and is different from the prediction using a cutoff.

Enrichment: An estimate of enrichment, that is, the increased likelihood (versus random) of this sample being in the category.

Bayesian Score: The standard Laplacian-modified Bayesian score.

Mahalanobis Distance: The Mahalanobis distance (MD) is the distance to the center of the training data. The larger the MD, the less trustworthy the prediction.

Mahalanobis Distance p-value: The p-value gives the fraction of training data with an MD greater than or equal to the one for the given sample, assuming normally distributed data. The smaller the p-value, the less trustworthy the prediction. For highly non-normal X properties (e.g., fingerprints), the MD p-value is wildly inaccurate.

## Structural Similar Compounds

| Name               | Bicalutamide                                                        | Phenolphthalein                                                     | Lansoprazole                                                        |
|--------------------|---------------------------------------------------------------------|---------------------------------------------------------------------|---------------------------------------------------------------------|
| Structure          |                                                                     |                                                                     |                                                                     |
| Actual Endpoint    | Single-Carcinogen                                                   | Multiple-Carcinogen                                                 | Single-Carcinogen                                                   |
| Predicted Endpoint | Single-Carcinogen                                                   | Multiple-Carcinogen                                                 | Single-Carcinogen                                                   |
| Distance           | 0.629                                                               | 0.680                                                               | 0.721                                                               |
| Reference          | US FDA (Centre for Drug Eval.& Res./Off. Testing & Res.) Sept. 1997 | US FDA (Centre for Drug Eval.& Res./Off. Testing & Res.) Sept. 1997 | US FDA (Centre for Drug Eval.& Res./Off. Testing & Res.) Sept. 1997 |

## Model Applicability

Unknown features are fingerprint features in the query molecule, but not found or appearing too infrequently in the training set.

1. All properties and OPS components are within expected ranges.
2. Unknown FCFP\_2 feature: -1374842118: [\*]:n:[c](Cl):n:[\*]

## Feature Contribution

### Top features for positive contribution

| Fingerprint | Bit/Smiles | Feature Structure   | Score | Multiple-Carcinogen in training set |
|-------------|------------|---------------------|-------|-------------------------------------|
| FCFP_12     | -885461129 | <br>[*]NNC(=[*])[*] | 0.683 | 3 out of 3                          |

|                                        |             |                                                                                                                                        |        |                                     |
|----------------------------------------|-------------|----------------------------------------------------------------------------------------------------------------------------------------|--------|-------------------------------------|
| FCFP_12                                | 1294344583  | 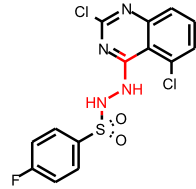<br><chem>[*]NN[c](:[*]):[*]</chem>                 | 0.174  | 1 out of 2                          |
| Top Features for negative contribution |             |                                                                                                                                        |        |                                     |
| Fingerprint                            | Bit/Smiles  | Feature Structure                                                                                                                      | Score  | Multiple-Carcinogen in training set |
| FCFP_12                                | -1151884458 | <br><chem>[*]N[c](:n:[*]):[c](:[*]):[*]</chem>      | -1.11  | 0 out of 6                          |
| FCFP_12                                | 178336375   | <br><chem>[*]:[cH]:[c](:n:[*]):[c](:[*]):[*]</chem> | -0.994 | 0 out of 5                          |
| FCFP_12                                | -1096219292 | <br><chem>[*]NS(=O)(=O)[c](:[*]):[*]</chem>       | -0.859 | 0 out of 4                          |

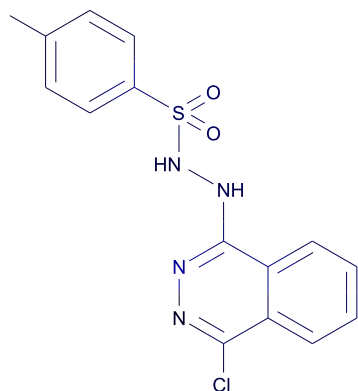

$C_{15}H_{13}ClN_4O_2S$

Molecular Weight: 348.80731

ALogP: 3.529

Rotatable Bonds: 4

Acceptors: 5

Donors: 2

## Model Prediction

Prediction: Single-Carcinogen

Probability: 0.149

Enrichment: 0.496

Bayesian Score: -11.3

Mahalanobis Distance: 17

Mahalanobis Distance p-value: 6.46e-008

Prediction: Positive if the Bayesian score is above the estimated best cutoff value from minimizing the false positive and false negative rate.

Probability: The estimated probability that the sample is in the positive category. This assumes that the Bayesian score follows a normal distribution and is different from the prediction using a cutoff.

Enrichment: An estimate of enrichment, that is, the increased likelihood (versus random) of this sample being in the category.

Bayesian Score: The standard Laplacian-modified Bayesian score.

Mahalanobis Distance: The Mahalanobis distance (MD) is the distance to the center of the training data. The larger the MD, the less trustworthy the prediction.

Mahalanobis Distance p-value: The p-value gives the fraction of training data with an MD greater than or equal to the one for the given sample, assuming normally distributed data. The smaller the p-value, the less trustworthy the prediction. For highly non-normal X properties (e.g., fingerprints), the MD p-value is wildly inaccurate.

## Structural Similar Compounds

| Name               | Phenolphthalein                                                     | Bicalutamide                                                        | Sulfamethazine                                                      |
|--------------------|---------------------------------------------------------------------|---------------------------------------------------------------------|---------------------------------------------------------------------|
| Structure          |                                                                     |                                                                     |                                                                     |
| Actual Endpoint    | Multiple-Carcinogen                                                 | Single-Carcinogen                                                   | Single-Carcinogen                                                   |
| Predicted Endpoint | Multiple-Carcinogen                                                 | Single-Carcinogen                                                   | Single-Carcinogen                                                   |
| Distance           | 0.657                                                               | 0.667                                                               | 0.723                                                               |
| Reference          | US FDA (Centre for Drug Eval.& Res./Off. Testing & Res.) Sept. 1997 | US FDA (Centre for Drug Eval.& Res./Off. Testing & Res.) Sept. 1997 | US FDA (Centre for Drug Eval.& Res./Off. Testing & Res.) Sept. 1997 |

## Model Applicability

Unknown features are fingerprint features in the query molecule, but not found or appearing too infrequently in the training set.

1. All properties and OPS components are within expected ranges.
2. Unknown FCFP\_2 feature: -1374812327: [\*]:n:[c](Cl):[c](:[\*]):[\*]

## Feature Contribution

### Top features for positive contribution

| Fingerprint | Bit/Smiles | Feature Structure   | Score | Multiple-Carcinogen in training set |
|-------------|------------|---------------------|-------|-------------------------------------|
| FCFP_12     | -885461129 | <br>[*]NNC(=[*])[*] | 0.683 | 3 out of 3                          |

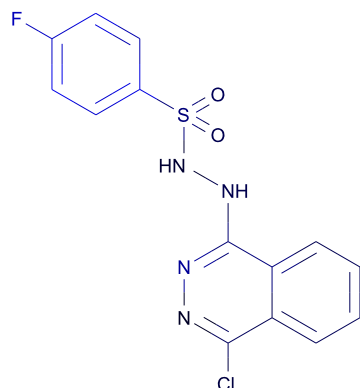

$C_{14}H_{10}ClFN_4O_2S$

Molecular Weight: 352.7712

ALogP: 3.248

Rotatable Bonds: 4

Acceptors: 5

Donors: 2

## Model Prediction

Prediction: Single-Carcinogen

Probability: 0.145

Enrichment: 0.483

Bayesian Score: -14

Mahalanobis Distance: 14.9

Mahalanobis Distance p-value: 2.99e-006

Prediction: Positive if the Bayesian score is above the estimated best cutoff value from minimizing the false positive and false negative rate.

Probability: The estimated probability that the sample is in the positive category. This assumes that the Bayesian score follows a normal distribution and is different from the prediction using a cutoff.

Enrichment: An estimate of enrichment, that is, the increased likelihood (versus random) of this sample being in the category.

Bayesian Score: The standard Laplacian-modified Bayesian score.

Mahalanobis Distance: The Mahalanobis distance (MD) is the distance to the center of the training data. The larger the MD, the less trustworthy the prediction.

Mahalanobis Distance p-value: The p-value gives the fraction of training data with an MD greater than or equal to the one for the given sample, assuming normally distributed data. The smaller the p-value, the less trustworthy the prediction. For highly non-normal X properties (e.g., fingerprints), the MD p-value is wildly inaccurate.

## Structural Similar Compounds

| Name               | Bicalutamide                                                        | Phenolphthalein                                                     | Sulfamethazine                                                      |
|--------------------|---------------------------------------------------------------------|---------------------------------------------------------------------|---------------------------------------------------------------------|
| Structure          |                                                                     |                                                                     |                                                                     |
| Actual Endpoint    | Single-Carcinogen                                                   | Multiple-Carcinogen                                                 | Single-Carcinogen                                                   |
| Predicted Endpoint | Single-Carcinogen                                                   | Multiple-Carcinogen                                                 | Single-Carcinogen                                                   |
| Distance           | 0.638                                                               | 0.671                                                               | 0.710                                                               |
| Reference          | US FDA (Centre for Drug Eval.& Res./Off. Testing & Res.) Sept. 1997 | US FDA (Centre for Drug Eval.& Res./Off. Testing & Res.) Sept. 1997 | US FDA (Centre for Drug Eval.& Res./Off. Testing & Res.) Sept. 1997 |

## Model Applicability

Unknown features are fingerprint features in the query molecule, but not found or appearing too infrequently in the training set.

1. All properties and OPS components are within expected ranges.
2. Unknown FCFP\_2 feature: -1374812327: [\*]:n:[c](Cl):[c](:[\*]):[\*]

## Feature Contribution

### Top features for positive contribution

| Fingerprint | Bit/Smiles | Feature Structure | Score | Multiple-Carcinogen in training set |
|-------------|------------|-------------------|-------|-------------------------------------|
| FCFP_12     | -885461129 |                   | 0.683 | 3 out of 3                          |

[\*]NNC(=[\*])[\*]

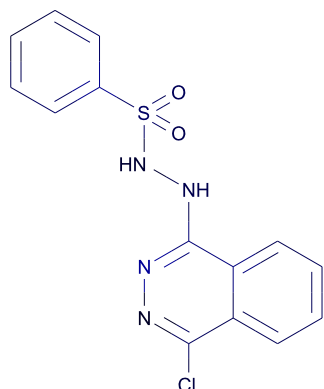

$C_{14}H_{11}ClN_4O_2S$

Molecular Weight: 334.78073

ALogP: 3.043

Rotatable Bonds: 4

Acceptors: 5

Donors: 2

## Model Prediction

Prediction: Single-Carcinogen

Probability: 0.148

Enrichment: 0.493

Bayesian Score: -11.1

Mahalanobis Distance: 17.6

Mahalanobis Distance p-value: 2.27e-008

Prediction: Positive if the Bayesian score is above the estimated best cutoff value from minimizing the false positive and false negative rate.

Probability: The estimated probability that the sample is in the positive category. This assumes that the Bayesian score follows a normal distribution and is different from the prediction using a cutoff.

Enrichment: An estimate of enrichment, that is, the increased likelihood (versus random) of this sample being in the category.

Bayesian Score: The standard Laplacian-modified Bayesian score.

Mahalanobis Distance: The Mahalanobis distance (MD) is the distance to the center of the training data. The larger the MD, the less trustworthy the prediction.

Mahalanobis Distance p-value: The p-value gives the fraction of training data with an MD greater than or equal to the one for the given sample, assuming normally distributed data. The smaller the p-value, the less trustworthy the prediction. For highly non-normal X properties (e.g., fingerprints), the MD p-value is wildly inaccurate.

## Structural Similar Compounds

| Name               | Phenolphthalein                                                     | Sulfamethazine                                                      | Bicalutamide                                                        |
|--------------------|---------------------------------------------------------------------|---------------------------------------------------------------------|---------------------------------------------------------------------|
| Structure          |                                                                     |                                                                     |                                                                     |
| Actual Endpoint    | Multiple-Carcinogen                                                 | Single-Carcinogen                                                   | Single-Carcinogen                                                   |
| Predicted Endpoint | Multiple-Carcinogen                                                 | Single-Carcinogen                                                   | Single-Carcinogen                                                   |
| Distance           | 0.667                                                               | 0.673                                                               | 0.681                                                               |
| Reference          | US FDA (Centre for Drug Eval.& Res./Off. Testing & Res.) Sept. 1997 | US FDA (Centre for Drug Eval.& Res./Off. Testing & Res.) Sept. 1997 | US FDA (Centre for Drug Eval.& Res./Off. Testing & Res.) Sept. 1997 |

## Model Applicability

Unknown features are fingerprint features in the query molecule, but not found or appearing too infrequently in the training set.

1. All properties and OPS components are within expected ranges.
2. Unknown FCFP\_2 feature: -1374812327: [\*]:n:[c](Cl):[c](:[\*]):[\*]

## Feature Contribution

### Top features for positive contribution

| Fingerprint | Bit/Smiles | Feature Structure   | Score | Multiple-Carcinogen in training set |
|-------------|------------|---------------------|-------|-------------------------------------|
| FCFP_12     | -885461129 | <br>[*]NNC(=[*])[*] | 0.683 | 3 out of 3                          |

# Thalidomide

# TOPKAT\_Mouse\_Male\_FDA\_Single\_vs\_Multiple

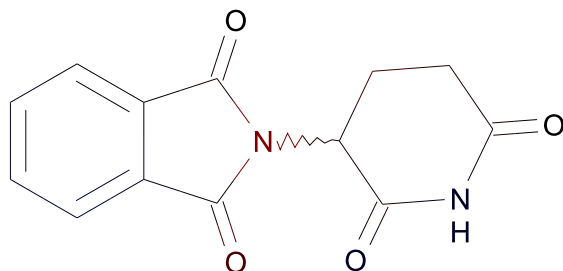

C<sub>13</sub>H<sub>10</sub>N<sub>2</sub>O<sub>4</sub>

Molecular Weight: 258.22949

ALogP: 9.7e-002

Rotatable Bonds: 1

Acceptors: 4

Donors: 1

## Model Prediction

**Prediction: Multiple-Carcinogen**

Probability: 0.219

Enrichment: 0.727

Bayesian Score: -1.62

Mahalanobis Distance: 8.2

Mahalanobis Distance p-value: 0.215

Prediction: Positive if the Bayesian score is above the estimated best cutoff value from minimizing the false positive and false negative rate.

Probability: The estimated probability that the sample is in the positive category. This assumes that the Bayesian score follows a normal distribution and is different from the prediction using a cutoff.

Enrichment: An estimate of enrichment, that is, the increased likelihood (versus random) of this sample being in the category.

Bayesian Score: The standard Laplacian-modified Bayesian score.

Mahalanobis Distance: The Mahalanobis distance (MD) is the distance to the center of the training data. The larger the MD, the less trustworthy the prediction.

Mahalanobis Distance p-value: The p-value gives the fraction of training data with an MD greater than or equal to the one for the given sample, assuming normally distributed data. The smaller the p-value, the less trustworthy the prediction. For highly non-normal X properties (e.g., fingerprints), the MD p-value is wildly inaccurate.

## Structural Similar Compounds

| Name               | Phenobarbital                                                       | Nitroacetophenetide                                                 | Metronidazole                                                       |
|--------------------|---------------------------------------------------------------------|---------------------------------------------------------------------|---------------------------------------------------------------------|
| Structure          |                                                                     |                                                                     |                                                                     |
| Actual Endpoint    | Multiple-Carcinogen                                                 | Single-Carcinogen                                                   | Multiple-Carcinogen                                                 |
| Predicted Endpoint | Multiple-Carcinogen                                                 | Single-Carcinogen                                                   | Multiple-Carcinogen                                                 |
| Distance           | 0.648                                                               | 0.673                                                               | 0.695                                                               |
| Reference          | US FDA (Centre for Drug Eval.& Res./Off. Testing & Res.) Sept. 1997 | US FDA (Centre for Drug Eval.& Res./Off. Testing & Res.) Sept. 1997 | US FDA (Centre for Drug Eval.& Res./Off. Testing & Res.) Sept. 1997 |

## Model Applicability

Unknown features are fingerprint features in the query molecule, but not found or appearing too infrequently in the training set.

1. All properties and OPS components are within expected ranges.

## Feature Contribution

### Top features for positive contribution

| Fingerprint | Bit/Smiles  | Feature Structure              | Score | Multiple-Carcinogen in training set |
|-------------|-------------|--------------------------------|-------|-------------------------------------|
| FCFP_12     | -1549163031 | <br>[*]N1[*]:[c](:[*])<br>C1=O | 0.683 | 3 out of 3                          |

|                                        |             |                                                                                                                                                       |        |                                     |
|----------------------------------------|-------------|-------------------------------------------------------------------------------------------------------------------------------------------------------|--------|-------------------------------------|
| FCFP_12                                | -989213044  | 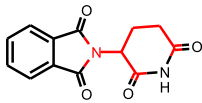<br><chem>[*]N([*])C1CCC(=[*])[*]C1=[*]</chem>                     | 0.679  | 5 out of 6                          |
| FCFP_12                                | -1043310069 | <br><chem>[*]CC(N([*])[*])C(=[*])[*]</chem>                        | 0.597  | 7 out of 10                         |
| Top Features for negative contribution |             |                                                                                                                                                       |        |                                     |
| Fingerprint                            | Bit/Smiles  | Feature Structure                                                                                                                                     | Score  | Multiple-Carcinogen in training set |
| FCFP_12                                | 991735244   | <br><chem>[*]:[c]1:[*]:[cH]:[cH]:[cH]:[cH]:1</chem>                | -0.562 | 5 out of 28                         |
| FCFP_12                                | 566058135   | <br><chem>[*]CC(=O)N[*]</chem>                                   | -0.528 | 3 out of 17                         |
| FCFP_12                                | -1698724694 | <br><chem>[*]S(=[*])(=[*])[c]1:[cH]:[cH]:[cH]:[cH]:[cH]:1</chem> | -0.423 | 3 out of 15                         |

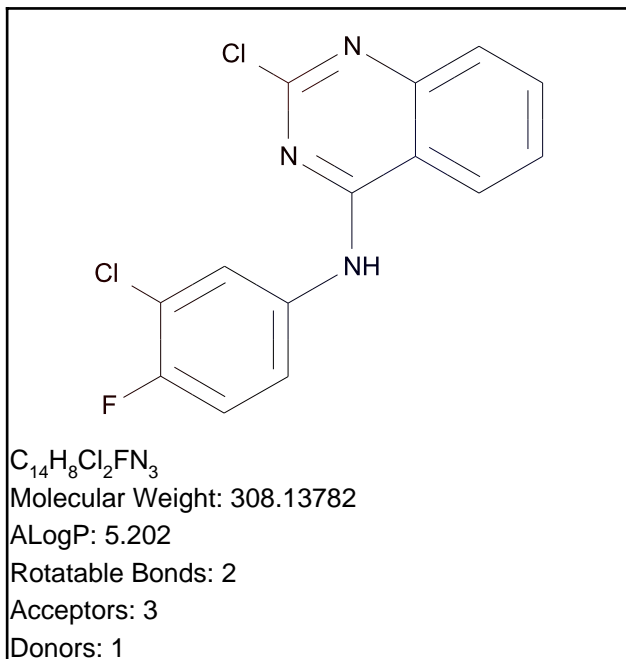

## Model Prediction

Prediction: Mild

Probability: 0.813

Enrichment: 1.18

Bayesian Score: -0.466

Mahalanobis Distance: 6.91

Mahalanobis Distance p-value: 0.999

Prediction: Positive if the Bayesian score is above the estimated best cutoff value from minimizing the false positive and false negative rate.

Probability: The estimated probability that the sample is in the positive category. This assumes that the Bayesian score follows a normal distribution and is different from the prediction using a cutoff.

Enrichment: An estimate of enrichment, that is, the increased likelihood (versus random) of this sample being in the category.

Bayesian Score: The standard Laplacian-modified Bayesian score.

Mahalanobis Distance: The Mahalanobis distance (MD) is the distance to the center of the training data. The larger the MD, the less trustworthy the prediction.

Mahalanobis Distance p-value: The p-value gives the fraction of training data with an MD greater than or equal to the one for the given sample, assuming normally distributed data. The smaller the p-value, the less trustworthy the prediction. For highly non-normal X properties (e.g., fingerprints), the MD p-value is wildly inaccurate.

## Structural Similar Compounds

| Name               | ANTHRAQUINONE;1-(2;4;6-TRIMETHYLPHENYLAMINO)-                                       | BENZILIC ACID; 4;4'-DICHLORO-; ISOPROPYL ESTER                                      | BENZAMIDE; N-(5-CHLORO-1-ANTHRAQUINONYL)-                                           |
|--------------------|-------------------------------------------------------------------------------------|-------------------------------------------------------------------------------------|-------------------------------------------------------------------------------------|
| Structure          | 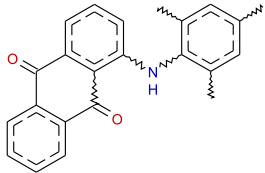 |  |  |
| Actual Endpoint    | Moderate_Severe                                                                     | Moderate_Severe                                                                     | Mild                                                                                |
| Predicted Endpoint | Mild                                                                                | Moderate_Severe                                                                     | Mild                                                                                |
| Distance           | 0.552                                                                               | 0.574                                                                               | 0.608                                                                               |
| Reference          | 28ZPAK-;242;72                                                                      | CIGET* -;77                                                                         | 28ZPAK 89;72                                                                        |

## Model Applicability

Unknown features are fingerprint features in the query molecule, but not found or appearing too infrequently in the training set.

- All properties and OPS components are within expected ranges.
- Unknown FCFP\_2 feature: -1151884458: [\*]N[c](:n:[\*]):[c](:[\*]):[\*]

## Feature Contribution

| Top features for positive contribution |            |                                                                                                                                                                    |       |                                 |
|----------------------------------------|------------|--------------------------------------------------------------------------------------------------------------------------------------------------------------------|-------|---------------------------------|
| Fingerprint                            | Bit/Smiles | Feature Structure                                                                                                                                                  | Score | Moderate_Severe in training set |
| FCFP_10                                | 2047994594 | 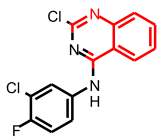<br><chem>[*][c]1:[*]:[c]([*]):[c]2:[cH]:[cH]:[cH]:[cH]:[cH]:[c]:2:n:1</chem> | 0.294 | 3 out of 3                      |

|                                        |             |                                                                                                                                                       |        |                                    |
|----------------------------------------|-------------|-------------------------------------------------------------------------------------------------------------------------------------------------------|--------|------------------------------------|
| FCFP_10                                | -1716224640 | 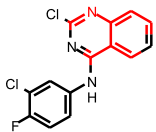<br>[*][c]1:[*]:[c]([*]):<br>[c]2:[cH]:[*]:[cH]:[<br>cH]:[c]:2:n:1 | 0.294  | 3 out of 3                         |
| FCFP_10                                | -2132756387 | <br>[*][c]1:[cH]:[cH]:[c]<br>(F):[c](Cl):[cH]:1                    | 0.294  | 3 out of 3                         |
| Top Features for negative contribution |             |                                                                                                                                                       |        |                                    |
| Fingerprint                            | Bit/Smiles  | Feature Structure                                                                                                                                     | Score  | Moderate_Severe<br>in training set |
| FCFP_10                                | -1320007763 | <br>[*][c](:[*]):[c]1:[cH<br>]:[cH]:[cH]:[*]:[c]:<br>1:[*]         | -0.316 | 19 out of 40                       |
| FCFP_10                                | 713358128   | <br>[*]:n:[c]1:[cH]:[cH]:<br>[cH]:[*]:[c]:1:[*]                  | -0.307 | 8 out of 17                        |
| FCFP_10                                | 1293778554  | <br>[*]:[c](:[*])N[c](:[*<br>]):[*]                              | -0.304 | 9 out of 19                        |

7a

## TOPKAT\_Ocular\_Irritancy\_Mild\_vs\_Moderate\_Severe

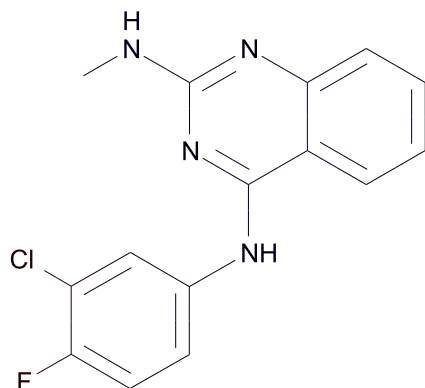C<sub>15</sub>H<sub>12</sub>ClFN<sub>4</sub>

Molecular Weight: 302.73398

ALogP: 4.677

Rotatable Bonds: 3

Acceptors: 4

Donors: 2

**Model Prediction**

Prediction: Mild

Probability: 0.768

Enrichment: 1.11

Bayesian Score: -2.04

Mahalanobis Distance: 6.81

Mahalanobis Distance p-value: 0.999

Prediction: Positive if the Bayesian score is above the estimated best cutoff value from minimizing the false positive and false negative rate.

Probability: The estimated probability that the sample is in the positive category. This assumes that the Bayesian score follows a normal distribution and is different from the prediction using a cutoff.

Enrichment: An estimate of enrichment, that is, the increased likelihood (versus random) of this sample being in the category.

Bayesian Score: The standard Laplacian-modified Bayesian score.

Mahalanobis Distance: The Mahalanobis distance (MD) is the distance to the center of the training data. The larger the MD, the less trustworthy the prediction.

Mahalanobis Distance p-value: The p-value gives the fraction of training data with an MD greater than or equal to the one for the given sample, assuming normally distributed data. The smaller the p-value, the less trustworthy the prediction. For highly non-normal X properties (e.g., fingerprints), the MD p-value is wildly inaccurate.

**Structural Similar Compounds**

| Name               | PHENOL;2;2'-METHYLENEBIS(4-CHLORO- | P-PHENYLENEDIAMINE; N;N'-DIPHENYL- | P-PHENYLENEDIAMINE; N-PHENYL-N'-CYCLOHEXYL- |
|--------------------|------------------------------------|------------------------------------|---------------------------------------------|
| Structure          |                                    |                                    |                                             |
| Actual Endpoint    | Moderate_Severe                    | Mild                               | Mild                                        |
| Predicted Endpoint | Moderate_Severe                    | Mild                               | Mild                                        |
| Distance           | 0.654                              | 0.679                              | 0.681                                       |
| Reference          | 28ZPAK-;82;72                      | 28ZPAK-;73;72                      | 28ZPAK-;73;72                               |

**Model Applicability**

Unknown features are fingerprint features in the query molecule, but not found or appearing too infrequently in the training set.

1. All properties and OPS components are within expected ranges.
2. Unknown FCFP\_2 feature: -1151884458: [\*]N[c](:n:[\*]):[c](:[\*]):[\*]

**Feature Contribution****Top features for positive contribution**

| Fingerprint | Bit/Smiles  | Feature Structure                               | Score | Moderate_Severe in training set |
|-------------|-------------|-------------------------------------------------|-------|---------------------------------|
| FCFP_10     | -2132756387 | <br>[*][c]1:[cH]:[cH]:[c]<br>(F):[c](Cl):[cH]:1 | 0.294 | 3 out of 3                      |

|                                        |             |                                                                                                                                                        |        |                                    |
|----------------------------------------|-------------|--------------------------------------------------------------------------------------------------------------------------------------------------------|--------|------------------------------------|
| FCFP_10                                | 2047994594  | 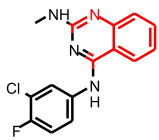<br>[*][c]1:[*]:[c]([*]):<br>[c]2:[cH]:[cH]:[cH]:<br>[cH]:[c]:2:n:1 | 0.294  | 3 out of 3                         |
| FCFP_10                                | -1716224640 | <br>[*][c]1:[*]:[c]([*]):<br>[c]2:[cH]:[*]:[cH]:[<br>cH]:[c]:2:n:1  | 0.294  | 3 out of 3                         |
| Top Features for negative contribution |             |                                                                                                                                                        |        |                                    |
| Fingerprint                            | Bit/Smiles  | Feature Structure                                                                                                                                      | Score  | Moderate_Severe<br>in training set |
| FCFP_10                                | -1320007763 | <br>[*][c](:[*]):[c]1:[cH<br>]:[cH]:[cH]:[*]:[c]:<br>1:[*]          | -0.316 | 19 out of 40                       |
| FCFP_10                                | 713358128   | <br>[*]:n:[c]1:[cH]:[cH]:<br>[cH]:[*]:[c]:1:[*]                    | -0.307 | 8 out of 17                        |
| FCFP_10                                | 1293778554  | <br>[*]:[c](:[*])N[c](:[*<br>]):[*]                               | -0.304 | 9 out of 19                        |

7b

## TOPKAT\_Ocular\_Irritancy\_Mild\_vs\_Moderate\_Severe

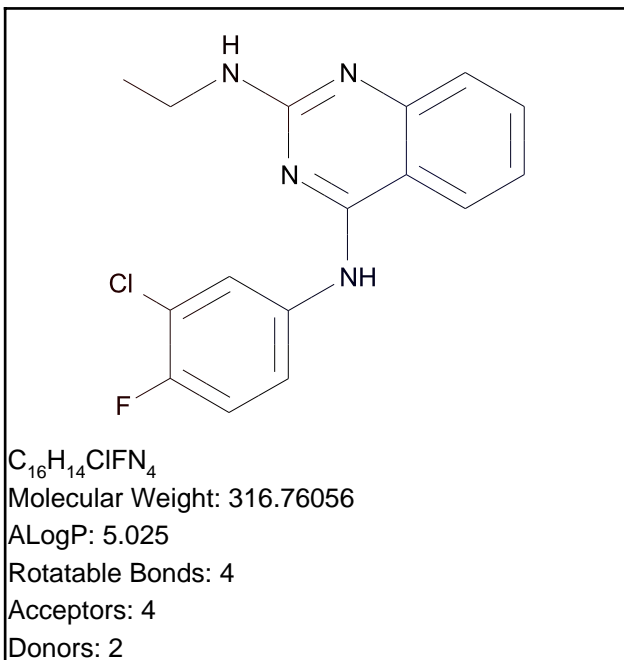**Model Prediction**

Prediction: Mild

Probability: 0.801

Enrichment: 1.16

Bayesian Score: -0.984

Mahalanobis Distance: 7.95

Mahalanobis Distance p-value: 0.934

Prediction: Positive if the Bayesian score is above the estimated best cutoff value from minimizing the false positive and false negative rate.

Probability: The estimated probability that the sample is in the positive category. This assumes that the Bayesian score follows a normal distribution and is different from the prediction using a cutoff.

Enrichment: An estimate of enrichment, that is, the increased likelihood (versus random) of this sample being in the category.

Bayesian Score: The standard Laplacian-modified Bayesian score.

Mahalanobis Distance: The Mahalanobis distance (MD) is the distance to the center of the training data. The larger the MD, the less trustworthy the prediction.

Mahalanobis Distance p-value: The p-value gives the fraction of training data with an MD greater than or equal to the one for the given sample, assuming normally distributed data. The smaller the p-value, the less trustworthy the prediction. For highly non-normal X properties (e.g., fingerprints), the MD p-value is wildly inaccurate.

**Structural Similar Compounds**

| Name               | PHENOL;2;2'-METHYLENEBIS(4-CHLORO-                                                  | P-PHENYLENEDIAMINE; N-PHENYL-N'-CYCLOHEXYL-                                         | P-PHENYLENEDIAMINE; N;N'-DIPHENYL-                                                  |
|--------------------|-------------------------------------------------------------------------------------|-------------------------------------------------------------------------------------|-------------------------------------------------------------------------------------|
| Structure          | 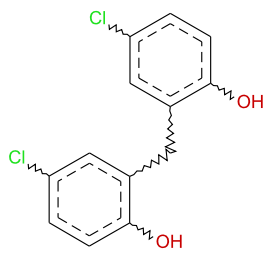 |  |  |
| Actual Endpoint    | Moderate_Severe                                                                     | Mild                                                                                | Mild                                                                                |
| Predicted Endpoint | Moderate_Severe                                                                     | Mild                                                                                | Mild                                                                                |
| Distance           | 0.674                                                                               | 0.681                                                                               | 0.682                                                                               |
| Reference          | 28ZPAK-;82;72                                                                       | 28ZPAK-;73;72                                                                       | 28ZPAK-;73;72                                                                       |

**Model Applicability**

Unknown features are fingerprint features in the query molecule, but not found or appearing too infrequently in the training set.

1. All properties and OPS components are within expected ranges.
2. Unknown FCFP\_2 feature: -1151884458: [\*]N[c](:n:[\*]):[c](:[\*]):[\*]

**Feature Contribution****Top features for positive contribution**

| Fingerprint | Bit/Smiles | Feature Structure                                                                                                                                                  | Score | Moderate_Severe in training set |
|-------------|------------|--------------------------------------------------------------------------------------------------------------------------------------------------------------------|-------|---------------------------------|
| FCFP_10     | 2047994594 | 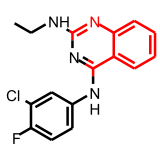<br><chem>[*][c]1:[*]:[c]([*]):[c]2:[cH]:[cH]:[cH]:[cH]:[cH]:[c]:2:n:1</chem> | 0.294 | 3 out of 3                      |

|                                        |             |                                                                                                                                                       |        |                                    |
|----------------------------------------|-------------|-------------------------------------------------------------------------------------------------------------------------------------------------------|--------|------------------------------------|
| FCFP_10                                | -2132756387 | 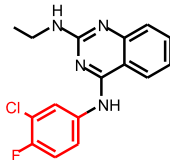<br>[*][c]1:[cH]:[cH]:[c]<br>(F):[c](Cl):[cH]:1                    | 0.294  | 3 out of 3                         |
| FCFP_10                                | -1716224640 | <br>[*][c]1:[*]:[c]([*]):<br>[c]2:[cH]:[*]:[cH]:[<br>cH]:[c]:2:n:1 | 0.294  | 3 out of 3                         |
| Top Features for negative contribution |             |                                                                                                                                                       |        |                                    |
| Fingerprint                            | Bit/Smiles  | Feature Structure                                                                                                                                     | Score  | Moderate_Severe<br>in training set |
| FCFP_10                                | -1320007763 | <br>[*][c](:[*]):[c]1:[cH<br>]:[cH]:[cH]:[*]:[c]:<br>1:[*]         | -0.316 | 19 out of 40                       |
| FCFP_10                                | 713358128   | <br>[*]:n:[c]1:[cH]:[cH]:<br>[cH]:[*]:[c]:1:[*]                   | -0.307 | 8 out of 17                        |
| FCFP_10                                | 1293778554  | <br>[*]:[c](:[*])N[c](:[*<br>]):[*]                              | -0.304 | 9 out of 19                        |

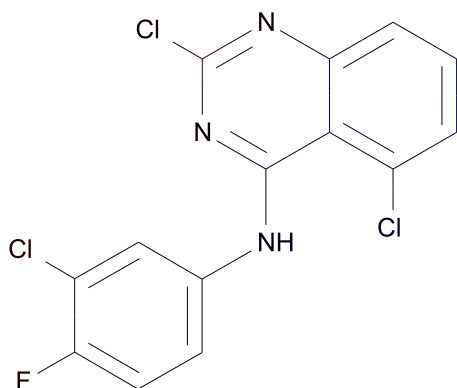

$C_{14}H_7Cl_3FN_3$

Molecular Weight: 342.58288

ALogP: 5.867

Rotatable Bonds: 2

Acceptors: 3

Donors: 1

## Model Prediction

Prediction: Mild

Probability: 0.801

Enrichment: 1.16

Bayesian Score: -0.954

Mahalanobis Distance: 7.04

Mahalanobis Distance p-value: 0.998

Prediction: Positive if the Bayesian score is above the estimated best cutoff value from minimizing the false positive and false negative rate.

Probability: The estimated probability that the sample is in the positive category. This assumes that the Bayesian score follows a normal distribution and is different from the prediction using a cutoff.

Enrichment: An estimate of enrichment, that is, the increased likelihood (versus random) of this sample being in the category.

Bayesian Score: The standard Laplacian-modified Bayesian score.

Mahalanobis Distance: The Mahalanobis distance (MD) is the distance to the center of the training data. The larger the MD, the less trustworthy the prediction.

Mahalanobis Distance p-value: The p-value gives the fraction of training data with an MD greater than or equal to the one for the given sample, assuming normally distributed data. The smaller the p-value, the less trustworthy the prediction. For highly non-normal X properties (e.g., fingerprints), the MD p-value is wildly inaccurate.

## Structural Similar Compounds

| Name               | ANTHRAQUINONE;1-(2;4;6-TRIMETHYLPHENYLAMINO)- | BENZILIC ACID; 4;4'-DICHLORO-; ISOPROPYL ESTER | BENZAMIDE; N-(5-CHLORO-1-ANTHRAQUINONYL)- |
|--------------------|-----------------------------------------------|------------------------------------------------|-------------------------------------------|
| Structure          |                                               |                                                |                                           |
| Actual Endpoint    | Moderate_Severe                               | Moderate_Severe                                | Mild                                      |
| Predicted Endpoint | Mild                                          | Moderate_Severe                                | Mild                                      |
| Distance           | 0.475                                         | 0.610                                          | 0.645                                     |
| Reference          | 28ZPAK-;242;72                                | CIGET* -;77                                    | 28ZPAK 89;72                              |

## Model Applicability

Unknown features are fingerprint features in the query molecule, but not found or appearing too infrequently in the training set.

- All properties and OPS components are within expected ranges.
- Unknown FCFP\_2 feature: -1151884458: [\*]N[c](:n:[\*]):[c](:[\*]):[\*]

## Feature Contribution

| Top features for positive contribution |             |                                                                        |       |                                 |
|----------------------------------------|-------------|------------------------------------------------------------------------|-------|---------------------------------|
| Fingerprint                            | Bit/Smiles  | Feature Structure                                                      | Score | Moderate_Severe in training set |
| FCFP_10                                | -1716224640 | <p>[*][c]1:[*]:[c]([*]):<br/>[c]2:[cH]:[*]:[cH]:<br/>cH]:[c]:2:n:1</p> | 0.294 | 3 out of 3                      |

| FCFP_10                                | 2047994594  | 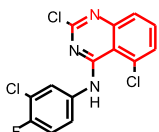<br>[*][c]1:[*]:[c]([*]):<br>[c]2:[cH]:[cH]:[cH]:<br>[cH]:[c]:2:n:1 | 0.294  | 3 out of 3                         |
|----------------------------------------|-------------|--------------------------------------------------------------------------------------------------------------------------------------------------------|--------|------------------------------------|
| FCFP_10                                | -2132756387 | <br>[*][c]1:[cH]:[cH]:[c]<br>(F):[c](Cl):[cH]:1                     | 0.294  | 3 out of 3                         |
| Top Features for negative contribution |             |                                                                                                                                                        |        |                                    |
| Fingerprint                            | Bit/Smiles  | Feature Structure                                                                                                                                      | Score  | Moderate_Severe<br>in training set |
| FCFP_10                                | 1237732457  | <br>[*][c](:[*]):[c]1:[c]<br>(Cl):[cH]:[cH]:[*]:[<br>c]:1:[*]       | -0.842 | 0 out of 2                         |
| FCFP_10                                | 713358128   | <br>[*]:n:[c]1:[cH]:[cH]:<br>[cH]:[*]:[c]:1:[*]                    | -0.307 | 8 out of 17                        |
| FCFP_10                                | 1293778554  | <br>[*]:[c](:[*])N[c](:[*]<br>]):[*]                              | -0.304 | 9 out of 19                        |

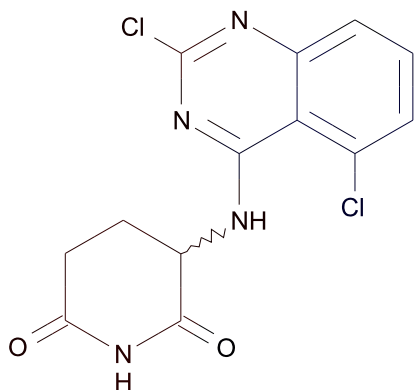
 $C_{13}H_{10}Cl_2N_4O_2$ 

Molecular Weight: 325.15009

ALogP: 2.49

Rotatable Bonds: 2

Acceptors: 5

Donors: 2

### Model Prediction

Prediction: Moderate\_Severe

Probability: 0.825

Enrichment: 1.2

Bayesian Score: 0.195

Mahalanobis Distance: 8.96

Mahalanobis Distance p-value: 0.531

Prediction: Positive if the Bayesian score is above the estimated best cutoff value from minimizing the false positive and false negative rate.

Probability: The estimated probability that the sample is in the positive category. This assumes that the Bayesian score follows a normal distribution and is different from the prediction using a cutoff.

Enrichment: An estimate of enrichment, that is, the increased likelihood (versus random) of this sample being in the category.

Bayesian Score: The standard Laplacian-modified Bayesian score.

Mahalanobis Distance: The Mahalanobis distance (MD) is the distance to the center of the training data. The larger the MD, the less trustworthy the prediction.

Mahalanobis Distance p-value: The p-value gives the fraction of training data with an MD greater than or equal to the one for the given sample, assuming normally distributed data. The smaller the p-value, the less trustworthy the prediction. For highly non-normal X properties (e.g., fingerprints), the MD p-value is wildly inaccurate.

### Structural Similar Compounds

| Name               | ANTHRAQUINONE; 1-AMINO-4-HYDROXY-2-PHENOXY- | 1-AMINO-4-BENZOYLAMINO-ANTHRAQUINONE | 1-AMINO-4-HYDROXY-5-CHLORANTHRAQUINONE |
|--------------------|---------------------------------------------|--------------------------------------|----------------------------------------|
| Structure          |                                             |                                      |                                        |
| Actual Endpoint    | Mild                                        | Mild                                 | Mild                                   |
| Predicted Endpoint | Mild                                        | Mild                                 | Mild                                   |
| Distance           | 0.562                                       | 0.570                                | 0.597                                  |
| Reference          | 28ZPAK 239;72                               | 28ZPAK-;124;72                       | 28ZPAK-;83;72                          |

### Model Applicability

Unknown features are fingerprint features in the query molecule, but not found or appearing too infrequently in the training set.

1. All properties and OPS components are within expected ranges.
2. Unknown FCFP\_2 feature: -1151884458: [\*]N[c](:n:[\*]):[c](:[\*]):[\*]

### Feature Contribution

#### Top features for positive contribution

| Fingerprint | Bit/Smiles  | Feature Structure                                              | Score | Moderate_Severe in training set |
|-------------|-------------|----------------------------------------------------------------|-------|---------------------------------|
| FCFP_10     | -1716224640 | <br>[*][c]1:[*]:[c]([*]):<br>[c]2:[cH]:[*]:[cH]:[cH]:[c]:2:n:1 | 0.294 | 3 out of 3                      |

|                                        |            |                                                                                                                                                        |        |                                    |
|----------------------------------------|------------|--------------------------------------------------------------------------------------------------------------------------------------------------------|--------|------------------------------------|
| FCFP_10                                | 2047994594 | 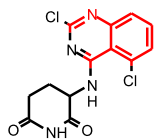<br>[*][c]1:[*]:[c]([*]):<br>[c]2:[cH]:[cH]:[cH]:<br>[cH]:[c]:2:n:1 | 0.294  | 3 out of 3                         |
| FCFP_10                                | -922480536 | <br>[*]=C1[*]CCC(=O)N1                                              | 0.256  | 2 out of 2                         |
| Top Features for negative contribution |            |                                                                                                                                                        |        |                                    |
| Fingerprint                            | Bit/Smiles | Feature Structure                                                                                                                                      | Score  | Moderate_Severe<br>in training set |
| FCFP_10                                | 1237732457 | <br>[*][c](:[*]):[c]1:[c]<br>(Cl):[cH]:[cH]:[*]:[<br>c]:1:[*]       | -0.842 | 0 out of 2                         |
| FCFP_10                                | 713358128  | <br>[*]:n:[c]1:[cH]:[cH]:<br>[cH]:[*]:[c]:1:[*]                    | -0.307 | 8 out of 17                        |
| FCFP_10                                | 307419094  | <br>[*][c](:[*]):[c](:[cH<br>]:[*]):[c](:[*]):[*]                 | -0.29  | 21 out of 43                       |

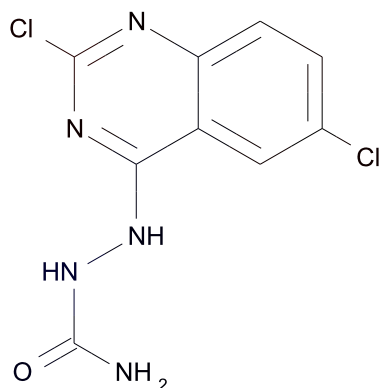

$C_9H_7Cl_2N_5O$

Molecular Weight: 272.09078

ALogP: 2.379

Rotatable Bonds: 2

Acceptors: 4

Donors: 3

## Model Prediction

Prediction: Mild

Probability: 0.806

Enrichment: 1.17

Bayesian Score: -0.782

Mahalanobis Distance: 6.62

Mahalanobis Distance p-value: 1

Prediction: Positive if the Bayesian score is above the estimated best cutoff value from minimizing the false positive and false negative rate.

Probability: The estimated probability that the sample is in the positive category. This assumes that the Bayesian score follows a normal distribution and is different from the prediction using a cutoff.

Enrichment: An estimate of enrichment, that is, the increased likelihood (versus random) of this sample being in the category.

Bayesian Score: The standard Laplacian-modified Bayesian score.

Mahalanobis Distance: The Mahalanobis distance (MD) is the distance to the center of the training data. The larger the MD, the less trustworthy the prediction.

Mahalanobis Distance p-value: The p-value gives the fraction of training data with an MD greater than or equal to the one for the given sample, assuming normally distributed data. The smaller the p-value, the less trustworthy the prediction. For highly non-normal X properties (e.g., fingerprints), the MD p-value is wildly inaccurate.

## Structural Similar Compounds

| Name               | 2-NAPHTHALENESULFONIC ACID; 4-HYDROXY-7-(METHYLAMINO)- | 1;2;4-TRIHYDROXY ANTHRAQUINONE | Benzimidazole; 6-amino-2-(3'-aminophenyl)-; dihydrochloride           |
|--------------------|--------------------------------------------------------|--------------------------------|-----------------------------------------------------------------------|
| Structure          |                                                        |                                |                                                                       |
| Actual Endpoint    | Mild                                                   | Mild                           | Moderate_Severe                                                       |
| Predicted Endpoint | Mild                                                   | Mild                           | Moderate_Severe                                                       |
| Distance           | 0.583                                                  | 0.594                          | 0.613                                                                 |
| Reference          | 28ZPAK 190;72                                          | 28ZPAK-;103;7                  | Prehled Prumyslove Toxikologie; Organicke Latky; Marhold; J. -;831;86 |

## Model Applicability

Unknown features are fingerprint features in the query molecule, but not found or appearing too infrequently in the training set.

1. All properties and OPS components are within expected ranges.
2. Unknown FCFP\_2 feature: -1151884458: [\*]N[c](:n:[\*]):[c](:[\*]):[\*]
3. Unknown FCFP\_2 feature: -885461129: [\*]NNC(=[\*])[\*]

## Feature Contribution

| Top features for positive contribution |            |                                                  |       |                                 |
|----------------------------------------|------------|--------------------------------------------------|-------|---------------------------------|
| Fingerprint                            | Bit/Smiles | Feature Structure                                | Score | Moderate_Severe in training set |
| FCFP_10                                | -745491832 | <p>[*]:[c]1:[*]:[cH]:[cH]<br/>[c](Cl):[cH]:1</p> | 0.304 | 29 out of 32                    |

|                                        |             |                                                                                                                                                            |        |                                 |
|----------------------------------------|-------------|------------------------------------------------------------------------------------------------------------------------------------------------------------|--------|---------------------------------|
| FCFP_10                                | -1716224640 | 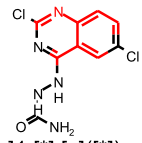<br><chem>[*][c]1:[*]:[c]([*]):[c]2:[cH]:[*]:[cH]:[cH]:[c]:2:n:1</chem> | 0.294  | 3 out of 3                      |
| FCFP_10                                | 1070061035  | <br><chem>[*]C(=[*])N</chem>                                            | 0.239  | 284 out of 338                  |
| Top Features for negative contribution |             |                                                                                                                                                            |        |                                 |
| Fingerprint                            | Bit/Smiles  | Feature Structure                                                                                                                                          | Score  | Moderate_Severe in training set |
| FCFP_10                                | 1294344583  | <br><chem>[*]NN[c](:[*]):[*]</chem>                                     | -0.507 | 0 out of 1                      |
| FCFP_10                                | 1499521844  | <br><chem>[*]NC(=O)N</chem>                                            | -0.4   | 1 out of 3                      |
| FCFP_10                                | 713358128   | <br><chem>[*]:n:[c]1:[cH]:[cH]:[cH]:[cH]:[*]:[c]:1:[*]</chem>         | -0.307 | 8 out of 17                     |

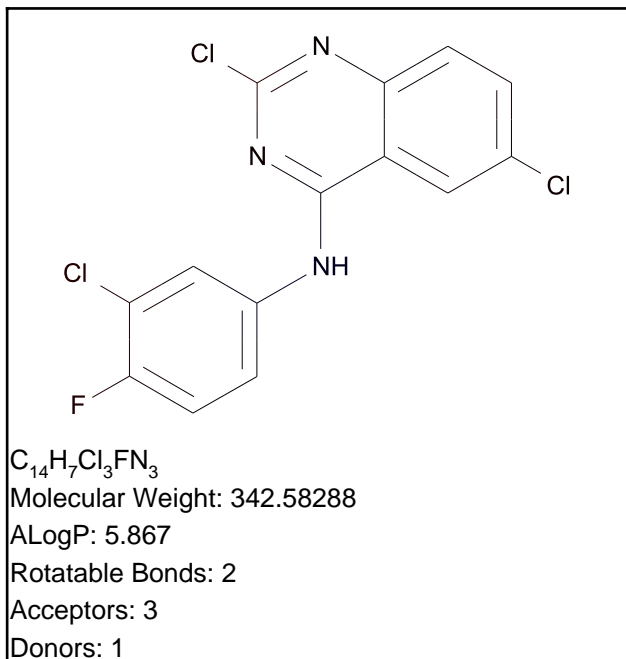

### Model Prediction

Prediction: **Moderate\_Severe**

Probability: 0.823

Enrichment: 1.19

Bayesian Score: 0.0833

Mahalanobis Distance: 7.04

Mahalanobis Distance p-value: 0.998

Prediction: Positive if the Bayesian score is above the estimated best cutoff value from minimizing the false positive and false negative rate.

Probability: The estimated probability that the sample is in the positive category. This assumes that the Bayesian score follows a normal distribution and is different from the prediction using a cutoff.

Enrichment: An estimate of enrichment, that is, the increased likelihood (versus random) of this sample being in the category.

Bayesian Score: The standard Laplacian-modified Bayesian score.

Mahalanobis Distance: The Mahalanobis distance (MD) is the distance to the center of the training data. The larger the MD, the less trustworthy the prediction.

Mahalanobis Distance p-value: The p-value gives the fraction of training data with an MD greater than or equal to the one for the given sample, assuming normally distributed data. The smaller the p-value, the less trustworthy the prediction. For highly non-normal X properties (e.g., fingerprints), the MD p-value is wildly inaccurate.

### Structural Similar Compounds

| Name               | ANTHRAQUINONE;1-(2;4;6-TRIMETHYLPHENYLAMINO)-                                       | BENZILIC ACID; 4;4'-DICHLORO-; ISOPROPYL ESTER                                      | BENZAMIDE; N-(5-CHLORO-1-ANTHRAQUINONYL)-                                           |
|--------------------|-------------------------------------------------------------------------------------|-------------------------------------------------------------------------------------|-------------------------------------------------------------------------------------|
| Structure          | 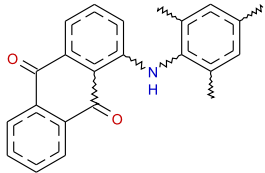 |  |  |
| Actual Endpoint    | Moderate_Severe                                                                     | Moderate_Severe                                                                     | Mild                                                                                |
| Predicted Endpoint | Mild                                                                                | Moderate_Severe                                                                     | Mild                                                                                |
| Distance           | 0.481                                                                               | 0.604                                                                               | 0.650                                                                               |
| Reference          | 28ZPAK-;242;72                                                                      | CIGET* -;77                                                                         | 28ZPAK 89;72                                                                        |

### Model Applicability

Unknown features are fingerprint features in the query molecule, but not found or appearing too infrequently in the training set.

- All properties and OPS components are within expected ranges.
- Unknown FCFP\_2 feature: -1151884458: [\*]N[c](:n:[\*]):[c](:[\*]):[\*]

### Feature Contribution

| Top features for positive contribution |            |                                                                                                                                             |       |                                 |
|----------------------------------------|------------|---------------------------------------------------------------------------------------------------------------------------------------------|-------|---------------------------------|
| Fingerprint                            | Bit/Smiles | Feature Structure                                                                                                                           | Score | Moderate_Severe in training set |
| FCFP_10                                | -745491832 | 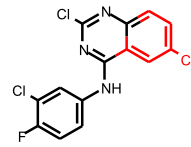<br><chem>[*]:[c]1:[*]:[cH]:[cH]:[c](Cl):[cH]:1</chem> | 0.304 | 29 out of 32                    |

|                                        |             |                                                                                                                                                   |        |                                 |
|----------------------------------------|-------------|---------------------------------------------------------------------------------------------------------------------------------------------------|--------|---------------------------------|
| FCFP_10                                | -2132756387 | 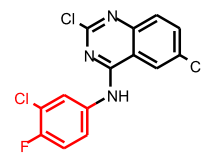<br>[*][c]1:[cH]:[cH]:[c]<br>(F):[c](Cl):[cH]:1                | 0.294  | 3 out of 3                      |
| FCFP_10                                | -1716224640 | <br>[*][c]1:[*]:[c]([*]):<br>[c]2:[cH]:[*]:[cH]:[cH]:[c]:2:n:1 | 0.294  | 3 out of 3                      |
| Top Features for negative contribution |             |                                                                                                                                                   |        |                                 |
| Fingerprint                            | Bit/Smiles  | Feature Structure                                                                                                                                 | Score  | Moderate_Severe in training set |
| FCFP_10                                | 713358128   | <br>[*]:n:[c]1:[cH]:[cH]:[cH]:[*]:[c]:1:[*]                    | -0.307 | 8 out of 17                     |
| FCFP_10                                | 1293778554  | <br>[*]:[c](:[*])N[c](:[*]):[*]                               | -0.304 | 9 out of 19                     |
| FCFP_10                                | -773983804  | <br>[*]N[c]1:[cH]:[*]:[c]([*]):[cH]:[cH]:1                   | -0.294 | 50 out of 102                   |

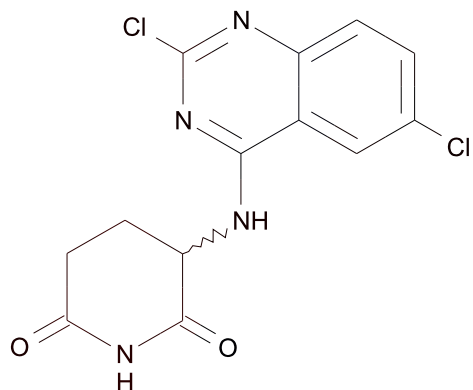

$C_{13}H_{10}Cl_2N_4O_2$

Molecular Weight: 325.15009

ALogP: 2.49

Rotatable Bonds: 2

Acceptors: 5

Donors: 2

## Model Prediction

Prediction: **Moderate\_Severe**

Probability: 0.838

Enrichment: 1.22

Bayesian Score: 1.23

Mahalanobis Distance: 8.96

Mahalanobis Distance p-value: 0.531

Prediction: Positive if the Bayesian score is above the estimated best cutoff value from minimizing the false positive and false negative rate.

Probability: The estimated probability that the sample is in the positive category. This assumes that the Bayesian score follows a normal distribution and is different from the prediction using a cutoff.

Enrichment: An estimate of enrichment, that is, the increased likelihood (versus random) of this sample being in the category.

Bayesian Score: The standard Laplacian-modified Bayesian score.

Mahalanobis Distance: The Mahalanobis distance (MD) is the distance to the center of the training data. The larger the MD, the less trustworthy the prediction.

Mahalanobis Distance p-value: The p-value gives the fraction of training data with an MD greater than or equal to the one for the given sample, assuming normally distributed data. The smaller the p-value, the less trustworthy the prediction. For highly non-normal X properties (e.g., fingerprints), the MD p-value is wildly inaccurate.

## Structural Similar Compounds

| Name               | ANTHRAQUINONE; 1-AMINO-4-HYDROXY-2-PHENOXY- | 1-AMINO-4-BENZOYLAMINO-ANTHRAQUINONE | 1-AMINO-4-HYDROXY-5-CHLORANTHRAQUINONE |
|--------------------|---------------------------------------------|--------------------------------------|----------------------------------------|
| Structure          |                                             |                                      |                                        |
| Actual Endpoint    | Mild                                        | Mild                                 | Mild                                   |
| Predicted Endpoint | Mild                                        | Mild                                 | Mild                                   |
| Distance           | 0.567                                       | 0.576                                | 0.602                                  |
| Reference          | 28ZPAK 239;72                               | 28ZPAK-;124;72                       | 28ZPAK-;83;72                          |

## Model Applicability

Unknown features are fingerprint features in the query molecule, but not found or appearing too infrequently in the training set.

1. All properties and OPS components are within expected ranges.
2. Unknown FCFP\_2 feature: -1151884458: [\*]N[c](:n:[\*]):[c](:[\*]):[\*]

## Feature Contribution

| Top features for positive contribution |            |                                              |       |                                 |
|----------------------------------------|------------|----------------------------------------------|-------|---------------------------------|
| Fingerprint                            | Bit/Smiles | Feature Structure                            | Score | Moderate_Severe in training set |
| FCFP_10                                | -745491832 | <p>[*]:[c]1:[*]:[cH]:[cH]:[c](Cl):[cH]:1</p> | 0.304 | 29 out of 32                    |

|                                        |             |                                                                                                                                                            |        |                                 |
|----------------------------------------|-------------|------------------------------------------------------------------------------------------------------------------------------------------------------------|--------|---------------------------------|
| FCFP_10                                | -1716224640 | 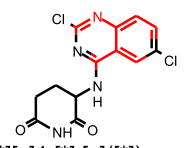<br><chem>[*][c]1:[*]:[c]([*]):[c]2:[cH]:[*]:[cH]:[cH]:[c]:2:n:1</chem> | 0.294  | 3 out of 3                      |
| FCFP_10                                | -922480536  | <br><chem>[*]=C1[*]CCC(=O)N1</chem>                                     | 0.256  | 2 out of 2                      |
| Top Features for negative contribution |             |                                                                                                                                                            |        |                                 |
| Fingerprint                            | Bit/Smiles  | Feature Structure                                                                                                                                          | Score  | Moderate_Severe in training set |
| FCFP_10                                | 713358128   | <br><chem>[*]:n:[c]1:[cH]:[cH]:[cH]:[cH]:[*]:[c]:1:[*]</chem>           | -0.307 | 8 out of 17                     |
| FCFP_10                                | 307419094   | <br><chem>[*][c]([*]):[c]:[cH]:[*]:[c]([*]):[*]</chem>                 | -0.29  | 21 out of 43                    |
| FCFP_10                                | 1294255210  | <br><chem>[*]:[c]([*])NC</chem>                                       | -0.218 | 20 out of 38                    |

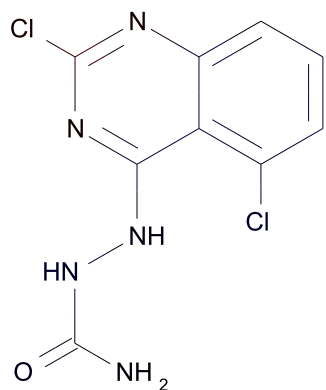

$C_9H_7Cl_2N_5O$

Molecular Weight: 272.09077

ALogP: 2.379

Rotatable Bonds: 2

Acceptors: 4

Donors: 3

## Model Prediction

Prediction: Mild

Probability: 0.776

Enrichment: 1.13

Bayesian Score: -1.82

Mahalanobis Distance: 6.62

Mahalanobis Distance p-value: 1

Prediction: Positive if the Bayesian score is above the estimated best cutoff value from minimizing the false positive and false negative rate.

Probability: The estimated probability that the sample is in the positive category. This assumes that the Bayesian score follows a normal distribution and is different from the prediction using a cutoff.

Enrichment: An estimate of enrichment, that is, the increased likelihood (versus random) of this sample being in the category. Bayesian Score: The standard Laplacian-modified Bayesian score.

Mahalanobis Distance: The Mahalanobis distance (MD) is the distance to the center of the training data. The larger the MD, the less trustworthy the prediction.

Mahalanobis Distance p-value: The p-value gives the fraction of training data with an MD greater than or equal to the one for the given sample, assuming normally distributed data. The smaller the p-value, the less trustworthy the prediction. For highly non-normal X properties (e.g., fingerprints), the MD p-value is wildly inaccurate.

## Structural Similar Compounds

| Name               | 2-NAPHTHALENESULFONIC ACID; 4-HYDROXY-7-(METHYLAMINO)- | 1;2;4-TRIHYDROXY ANTHRAQUINONE | Benzimidazole; 6-amino-2-(3'-aminophenyl)-; dihydrochloride           |
|--------------------|--------------------------------------------------------|--------------------------------|-----------------------------------------------------------------------|
| Structure          |                                                        |                                |                                                                       |
| Actual Endpoint    | Mild                                                   | Mild                           | Moderate_Severe                                                       |
| Predicted Endpoint | Mild                                                   | Mild                           | Moderate_Severe                                                       |
| Distance           | 0.583                                                  | 0.588                          | 0.607                                                                 |
| Reference          | 28ZPAK 190;72                                          | 28ZPAK-;103;7                  | Prehled Prumyslove Toxikologie; Organicke Latky; Marhold; J. -;831;86 |

## Model Applicability

Unknown features are fingerprint features in the query molecule, but not found or appearing too infrequently in the training set.

1. All properties and OPS components are within expected ranges.
2. Unknown FCFP\_2 feature: -1151884458: [\*]N[c](:n:[\*]):[c](:[\*]):[\*]
3. Unknown FCFP\_2 feature: -885461129: [\*]NNC(=[\*])[\*]

## Feature Contribution

### Top features for positive contribution

| Fingerprint | Bit/Smiles  | Feature Structure                                             | Score | Moderate_Severe in training set |
|-------------|-------------|---------------------------------------------------------------|-------|---------------------------------|
| FCFP_10     | -1716224640 | <p>[*][c]1:[*]:[c]([*]):[c]2:[cH]:[*]:[cH]:[cH]:[c]:2:n:1</p> | 0.294 | 3 out of 3                      |

|                                        |            |                                                                                                                                                             |        |                                 |
|----------------------------------------|------------|-------------------------------------------------------------------------------------------------------------------------------------------------------------|--------|---------------------------------|
| FCFP_10                                | 2047994594 | <br><chem>[*][c]1:[*]:[c]([*]):[c]2:[cH]:[cH]:[cH]:[cH]:[c]:2:n:1</chem> | 0.294  | 3 out of 3                      |
| FCFP_10                                | 1070061035 | <br><chem>[*]C(=[*])N</chem>                                             | 0.239  | 284 out of 338                  |
| Top Features for negative contribution |            |                                                                                                                                                             |        |                                 |
| Fingerprint                            | Bit/Smiles | Feature Structure                                                                                                                                           | Score  | Moderate_Severe in training set |
| FCFP_10                                | 1237732457 | <br><chem>[*][c](:[*]):[c]1:[c](Cl):[cH]:[cH]:[*]:[c]:1:[*]</chem>       | -0.842 | 0 out of 2                      |
| FCFP_10                                | 1294344583 | <br><chem>[*]NN[c](:[*]):[*]</chem>                                     | -0.507 | 0 out of 1                      |
| FCFP_10                                | 1499521844 | <br><chem>[*]NC(=O)N</chem>                                            | -0.4   | 1 out of 3                      |

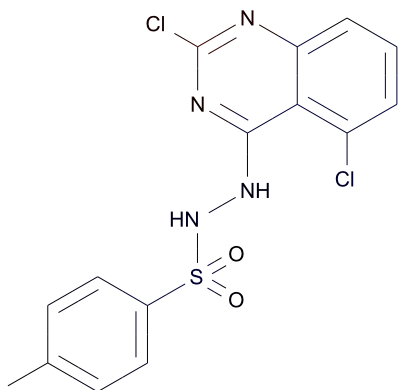

$C_{15}H_{12}Cl_2N_4O_2S$

Molecular Weight: 383.25237

ALogP: 4.443

Rotatable Bonds: 4

Acceptors: 5

Donors: 2

## Model Prediction

Prediction: Mild

Probability: 0.772

Enrichment: 1.12

Bayesian Score: -1.92

Mahalanobis Distance: 5.56

Mahalanobis Distance p-value: 1

Prediction: Positive if the Bayesian score is above the estimated best cutoff value from minimizing the false positive and false negative rate.

Probability: The estimated probability that the sample is in the positive category. This assumes that the Bayesian score follows a normal distribution and is different from the prediction using a cutoff.

Enrichment: An estimate of enrichment, that is, the increased likelihood (versus random) of this sample being in the category.

Bayesian Score: The standard Laplacian-modified Bayesian score.

Mahalanobis Distance: The Mahalanobis distance (MD) is the distance to the center of the training data. The larger the MD, the less trustworthy the prediction.

Mahalanobis Distance p-value: The p-value gives the fraction of training data with an MD greater than or equal to the one for the given sample, assuming normally distributed data. The smaller the p-value, the less trustworthy the prediction. For highly non-normal X properties (e.g., fingerprints), the MD p-value is wildly inaccurate.

## Structural Similar Compounds

| Name               | ANTHRAQUINONE; 1-AMINO-4-HYDROXY-2-PHENOXY- | 1-AMINO-4-BENZOYLAMINO-ANTHRAQUINONE | 5-NORBORNENE-2;3-DICARBOXYLIC ACID; 1;4;5;6;7;7-HEXACHLORO- |
|--------------------|---------------------------------------------|--------------------------------------|-------------------------------------------------------------|
| Structure          |                                             |                                      |                                                             |
| Actual Endpoint    | Mild                                        | Mild                                 | Moderate_Severe                                             |
| Predicted Endpoint | Mild                                        | Mild                                 | Moderate_Severe                                             |
| Distance           | 0.617                                       | 0.669                                | 0.705                                                       |
| Reference          | 28ZPAK 239;72                               | 28ZPAK-;124;72                       | 28ZPAK-;92;72                                               |

## Model Applicability

Unknown features are fingerprint features in the query molecule, but not found or appearing too infrequently in the training set.

1. All properties and OPS components are within expected ranges.
2. Unknown FCFP\_2 feature: -1151884458: [\*]N[c](:n[\*]):[c](:[\*]):[\*]
3. Unknown FCFP\_2 feature: -885461129: [\*]NNC(=[\*])[\*]

## Feature Contribution

| Top features for positive contribution |            |                                                                          |       |                                 |
|----------------------------------------|------------|--------------------------------------------------------------------------|-------|---------------------------------|
| Fingerprint                            | Bit/Smiles | Feature Structure                                                        | Score | Moderate_Severe in training set |
| FCFP_10                                | 2047994594 | <p>[*][c]1:[*]:[c]([*]):<br/>[c]2:[cH]:[cH]:[cH]:<br/>[cH]:[c]:2:n:1</p> | 0.294 | 3 out of 3                      |

|                                        |             |                                                                                                                                                            |        |                                 |
|----------------------------------------|-------------|------------------------------------------------------------------------------------------------------------------------------------------------------------|--------|---------------------------------|
| FCFP_10                                | -1716224640 | 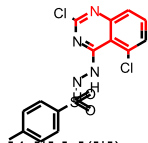<br><chem>[*][c]1:[*]:[c]([*]):[c]2:[cH]:[*]:[cH]:[cH]:[c]:2:n:1</chem> | 0.294  | 3 out of 3                      |
| FCFP_10                                | 1789442672  | <br><chem>[*]NS(=O)(=O)[c]1:[cH]:[cH]:[c](C):[cH]:[cH]:1</chem>         | 0.256  | 2 out of 2                      |
| Top Features for negative contribution |             |                                                                                                                                                            |        |                                 |
| Fingerprint                            | Bit/Smiles  | Feature Structure                                                                                                                                          | Score  | Moderate_Severe in training set |
| FCFP_10                                | 1237732457  | <br><chem>[*][c]([*]):[c]1:[c](Cl):[cH]:[cH]:[*]:[c]:1:[*]</chem>       | -0.842 | 0 out of 2                      |
| FCFP_10                                | 632767364   | <br><chem>[*]S(=[*])(=[*])[c]1:[cH]:[cH]:[c](C):[cH]:[cH]:1</chem>     | -0.6   | 1 out of 4                      |
| FCFP_10                                | 1294344583  | <br><chem>[*]NN[c]([*]):[*]</chem>                                    | -0.507 | 0 out of 1                      |

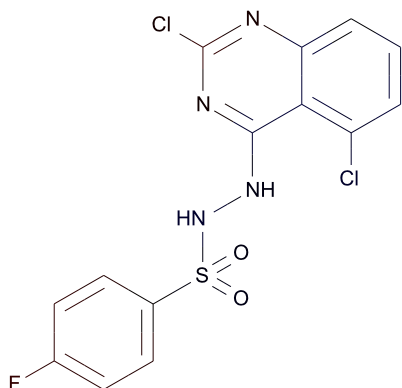
$$\text{C}_{14}\text{H}_9\text{Cl}_2\text{FN}_4\text{O}_2\text{S}$$

Molecular Weight: 387.21626

|ALogP: 4.162

Rotatable Bonds: 4

Acceptors: 5

Donors: 2

## Model Prediction

Prediction: Mild

Probability: 0.802

Enrichment: 1.16

Bayesian Score: -0.921

Mahalanobis Distance: 5.48

Mahalanobis Distance p-value: 1

Prediction: Positive if the Bayesian score is above the estimated best cutoff value from minimizing the false positive and false negative rate.

**Probability:** The estimated probability that the sample is in the positive category. This assumes that the Bayesian score follows a normal distribution and is different from the prediction using a cutoff.

Enrichment: An estimate of enrichment, that is, the increased likelihood (versus random) of this sample being in the category.  
Bayesian Score: The standard Laplacian-modified Bayesian score.

**Mahalanobis Distance:** The Mahalanobis distance (MD) is the distance to the center of the training data. The larger the MD, the less trustworthy the prediction.

Mahalanobis Distance p-value: The p-value gives the fraction of training data with an MD greater than or equal to the one for the given sample, assuming normally distributed data. The smaller the p-value, the less trustworthy the prediction. For highly non-normal X properties (e.g., fingerprints), the MD p-value is wildly inaccurate.

## Structural Similar Compounds

| Name               | ANTHRAQUINONE; 1-AMINO-4-HYDROXY-2-PHENOXY-                                         | 1-AMINO-4-BENZOYLAMINO-ANTHRAQUINONE                                                | 5-NORBORNENE-2;3-DICARBOXYLIC ACID; 1;4;5;6;7;7-HEXACHLORO-                         |
|--------------------|-------------------------------------------------------------------------------------|-------------------------------------------------------------------------------------|-------------------------------------------------------------------------------------|
| Structure          | 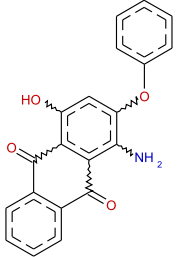 |  |  |
| Actual Endpoint    | Mild                                                                                | Mild                                                                                | Moderate_Severe                                                                     |
| Predicted Endpoint | Mild                                                                                | Mild                                                                                | Moderate_Severe                                                                     |
| Distance           | 0.601                                                                               | 0.650                                                                               | 0.682                                                                               |
| Reference          | 28ZPAK 239;72                                                                       | 28ZPAK-;124;72                                                                      | 28ZPAK-;92;72                                                                       |

## Model Applicability

Unknown features are fingerprint features in the query molecule, but not found or appearing too infrequently in the training set.

1. All properties and OPS components are within expected ranges.
2. Unknown FCFP\_2 feature: -1151884458: [\*]N[c](:n:[\*]):[c](:[\*]):[\*]
3. Unknown FCFP\_2 feature: -885461129: [\*]NNC(=[\*])[\*]

## Feature Contribution

| Top features for positive contribution |            |                                                                                                                                                                   |       |                                 |
|----------------------------------------|------------|-------------------------------------------------------------------------------------------------------------------------------------------------------------------|-------|---------------------------------|
| Fingerprint                            | Bit/Smiles | Feature Structure                                                                                                                                                 | Score | Moderate_Severe in training set |
| FCFP_10                                | -149636017 | 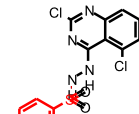<br><chem>[*]S(=O)(=O)[*]c1ccc(F)cc1C(=O)N2C(=N3C(=NC(=C3)Cl)N=C2Cl)N</chem> | 0.352 | 7 out of 7                      |

|                                        |             |                                                                                                                                                     |        |                                 |
|----------------------------------------|-------------|-----------------------------------------------------------------------------------------------------------------------------------------------------|--------|---------------------------------|
| FCFP_10                                | -1508180856 | 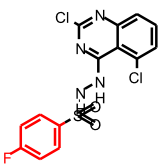<br><chem>[*][c]1:[cH]:[cH]:[c](F):[cH]:1</chem>                 | 0.329  | 16 out of 17                    |
| FCFP_10                                | -745491832  | <br><chem>[*]:[c]1:[*]:[cH]:[cH]:[c](Cl):[cH]:1</chem>           | 0.304  | 29 out of 32                    |
| Top Features for negative contribution |             |                                                                                                                                                     |        |                                 |
| Fingerprint                            | Bit/Smiles  | Feature Structure                                                                                                                                   | Score  | Moderate_Severe in training set |
| FCFP_10                                | 1237732457  | <br><chem>[*][c]([*]):[c]1:[c](Cl):[cH]:[cH]:[*]:[c]:1[*]</chem> | -0.842 | 0 out of 2                      |
| FCFP_10                                | 1294344583  | <br><chem>[*]NN[c]([*]):[*]</chem>                              | -0.507 | 0 out of 1                      |
| FCFP_10                                | 713358128   | <br><chem>[*]:n:[c]1:[cH]:[cH]:[cH]:[cH]:[*]:[c]:1[*]</chem>   | -0.307 | 8 out of 17                     |

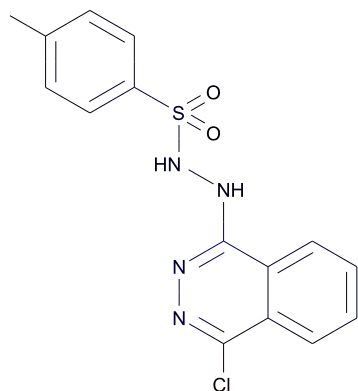

$C_{15}H_{13}ClN_4O_2S$

Molecular Weight: 348.80731

ALogP: 3.529

Rotatable Bonds: 4

Acceptors: 5

Donors: 2

## Model Prediction

Prediction: Mild

Probability: 0.73

Enrichment: 1.06

Bayesian Score: -2.95

Mahalanobis Distance: 5.53

Mahalanobis Distance p-value: 1

Prediction: Positive if the Bayesian score is above the estimated best cutoff value from minimizing the false positive and false negative rate.

Probability: The estimated probability that the sample is in the positive category. This assumes that the Bayesian score follows a normal distribution and is different from the prediction using a cutoff.

Enrichment: An estimate of enrichment, that is, the increased likelihood (versus random) of this sample being in the category.

Bayesian Score: The standard Laplacian-modified Bayesian score.

Mahalanobis Distance: The Mahalanobis distance (MD) is the distance to the center of the training data. The larger the MD, the less trustworthy the prediction.

Mahalanobis Distance p-value: The p-value gives the fraction of training data with an MD greater than or equal to the one for the given sample, assuming normally distributed data. The smaller the p-value, the less trustworthy the prediction. For highly non-normal X properties (e.g., fingerprints), the MD p-value is wildly inaccurate.

## Structural Similar Compounds

| Name               | ANTHRAQUINONE; 1-AMINO-4-HYDROXY-2-PHENOXY- | 1-AMINO-4-BENZOYLAMINO-ANTHRAQUINONE | 5-NORBORNENE-2;3-DICARBOXYLIC ACID; 1;4;5;6;7;7-HEXACHLORO- |
|--------------------|---------------------------------------------|--------------------------------------|-------------------------------------------------------------|
| Structure          |                                             |                                      |                                                             |
| Actual Endpoint    | Mild                                        | Mild                                 | Moderate_Severe                                             |
| Predicted Endpoint | Mild                                        | Mild                                 | Moderate_Severe                                             |
| Distance           | 0.528                                       | 0.591                                | 0.651                                                       |
| Reference          | 28ZPAK 239;72                               | 28ZPAK-;124;72                       | 28ZPAK-;92;72                                               |

## Model Applicability

Unknown features are fingerprint features in the query molecule, but not found or appearing too infrequently in the training set.

1. All properties and OPS components are within expected ranges.
2. Unknown FCFP\_2 feature: -1151884458: [\*]N[c](:n[\*]):[c](:[\*]):[\*]
3. Unknown FCFP\_2 feature: -885461129: [\*]NNC(=[\*])[\*]

## Feature Contribution

| Top features for positive contribution |            |                                                                    |       |                                 |
|----------------------------------------|------------|--------------------------------------------------------------------|-------|---------------------------------|
| Fingerprint                            | Bit/Smiles | Feature Structure                                                  | Score | Moderate_Severe in training set |
| FCFP_10                                | 1789442672 | <br><chem>[*]NS(=O)(=O)[c]1:[cH]1:[cH]:[c]([C]:[cH]1:[cH]:1</chem> | 0.256 | 2 out of 2                      |

|                                        |             |                                                                                                                                           |        |                                 |
|----------------------------------------|-------------|-------------------------------------------------------------------------------------------------------------------------------------------|--------|---------------------------------|
| FCFP_10                                | 136120670   | 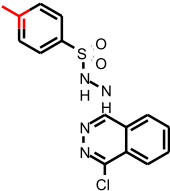<br>[*]:[c](:[*])C                                     | 0.206  | 53 out of 65                    |
| FCFP_10                                | -1374812327 | <br>[*]:n:[c](Cl):[c](:[*])[*]                         | 0.186  | 1 out of 1                      |
| Top Features for negative contribution |             |                                                                                                                                           |        |                                 |
| Fingerprint                            | Bit/Smiles  | Feature Structure                                                                                                                         | Score  | Moderate_Severe in training set |
| FCFP_10                                | 4427049     | <br>[*][c](:[*]):n:n:[*]                               | -1.29  | 0 out of 4                      |
| FCFP_10                                | 632767364   | <br>[*]S(=[*])(=[*])[c]1:[cH]:[cH]:[c](C):[cH]:[cH]:1 | -0.6   | 1 out of 4                      |
| FCFP_10                                | 1294344583  | <br>[*]NN[c](:[*]):[*]                               | -0.507 | 0 out of 1                      |

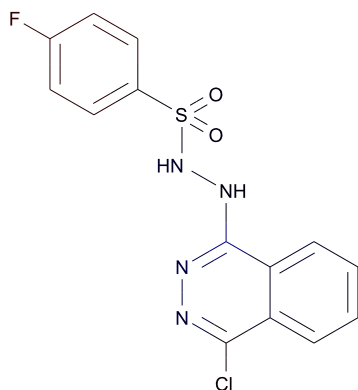

$C_{14}H_{10}ClFN_4O_2S$

Molecular Weight: 352.7712

ALogP: 3.248

Rotatable Bonds: 4

Acceptors: 5

Donors: 2

## Model Prediction

Prediction: Mild

Probability: 0.771

Enrichment: 1.12

Bayesian Score: -1.97

Mahalanobis Distance: 5.46

Mahalanobis Distance p-value: 1

Prediction: Positive if the Bayesian score is above the estimated best cutoff value from minimizing the false positive and false negative rate.

Probability: The estimated probability that the sample is in the positive category. This assumes that the Bayesian score follows a normal distribution and is different from the prediction using a cutoff.

Enrichment: An estimate of enrichment, that is, the increased likelihood (versus random) of this sample being in the category.

Bayesian Score: The standard Laplacian-modified Bayesian score.

Mahalanobis Distance: The Mahalanobis distance (MD) is the distance to the center of the training data. The larger the MD, the less trustworthy the prediction.

Mahalanobis Distance p-value: The p-value gives the fraction of training data with an MD greater than or equal to the one for the given sample, assuming normally distributed data. The smaller the p-value, the less trustworthy the prediction. For highly non-normal X properties (e.g., fingerprints), the MD p-value is wildly inaccurate.

## Structural Similar Compounds

| Name               | ANTHRAQUINONE; 1-AMINO-4-HYDROXY-2-PHENOXY- | 1-AMINO-4-BENZOYLAMINO-ANTHRAQUINONE | 5-NORBORNENE-2,3-DICARBOXYLIC ACID; 1,4,5,6,7,7-HEXACHLORO- |
|--------------------|---------------------------------------------|--------------------------------------|-------------------------------------------------------------|
| Structure          |                                             |                                      |                                                             |
| Actual Endpoint    | Mild                                        | Mild                                 | Moderate_Severe                                             |
| Predicted Endpoint | Mild                                        | Mild                                 | Moderate_Severe                                             |
| Distance           | 0.534                                       | 0.583                                | 0.638                                                       |
| Reference          | 28ZPAK 239;72                               | 28ZPAK-;124;72                       | 28ZPAK-;92;72                                               |

## Model Applicability

Unknown features are fingerprint features in the query molecule, but not found or appearing too infrequently in the training set.

1. All properties and OPS components are within expected ranges.
2. Unknown FCFP\_2 feature: -1151884458: [\*]N[c](:n[\*]):[c](:[\*]):[\*]
3. Unknown FCFP\_2 feature: -885461129: [\*]NNC(=[\*])[\*]

## Feature Contribution

| Top features for positive contribution |            |                                                           |       |                                 |
|----------------------------------------|------------|-----------------------------------------------------------|-------|---------------------------------|
| Fingerprint                            | Bit/Smiles | Feature Structure                                         | Score | Moderate_Severe in training set |
| FCFP_10                                | -149636017 | <p>[*]S(=[*])(=[*])[c]1: [cH]:[cH]:[c](F):[cH]:[cH]:1</p> | 0.352 | 7 out of 7                      |

|                                        |             |                                                                                                                                                  |        |                                    |
|----------------------------------------|-------------|--------------------------------------------------------------------------------------------------------------------------------------------------|--------|------------------------------------|
| FCFP_10                                | -1508180856 | 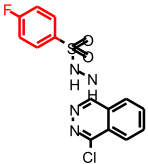<br>[*][c]1:[cH]:[cH]:[c]:<br>(F):[cH]:[cH]:1                 | 0.329  | 16 out of 17                       |
| FCFP_10                                | -745491832  | <br>[*]:[c]1:[*]:[cH]:[cH]<br>]:[c](Cl):[cH]:1                | 0.304  | 29 out of 32                       |
| Top Features for negative contribution |             |                                                                                                                                                  |        |                                    |
| Fingerprint                            | Bit/Smiles  | Feature Structure                                                                                                                                | Score  | Moderate_Severe<br>in training set |
| FCFP_10                                | 4427049     | <br>[*][c](:[*]):n:n:[*]                                      | -1.29  | 0 out of 4                         |
| FCFP_10                                | 1294344583  | <br>[*]NN[c](:[*]):[*]                                       | -0.507 | 0 out of 1                         |
| FCFP_10                                | -1320007763 | <br>[*][c](:[*]):[c]1:[cH]<br>]:[cH]:[cH]:[*]:[c]:<br>1:[*] | -0.316 | 19 out of 40                       |

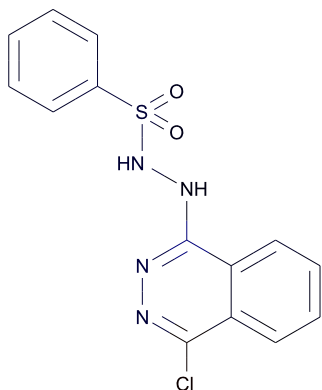

$C_{14}H_{11}ClN_4O_2S$

Molecular Weight: 334.78073

ALogP: 3.043

Rotatable Bonds: 4

Acceptors: 5

Donors: 2

## Model Prediction

Prediction: Mild

Probability: 0.704

Enrichment: 1.02

Bayesian Score: -3.46

Mahalanobis Distance: 5.5

Mahalanobis Distance p-value: 1

Prediction: Positive if the Bayesian score is above the estimated best cutoff value from minimizing the false positive and false negative rate.

Probability: The estimated probability that the sample is in the positive category. This assumes that the Bayesian score follows a normal distribution and is different from the prediction using a cutoff.

Enrichment: An estimate of enrichment, that is, the increased likelihood (versus random) of this sample being in the category.

Bayesian Score: The standard Laplacian-modified Bayesian score.

Mahalanobis Distance: The Mahalanobis distance (MD) is the distance to the center of the training data. The larger the MD, the less trustworthy the prediction.

Mahalanobis Distance p-value: The p-value gives the fraction of training data with an MD greater than or equal to the one for the given sample, assuming normally distributed data. The smaller the p-value, the less trustworthy the prediction. For highly non-normal X properties (e.g., fingerprints), the MD p-value is wildly inaccurate.

## Structural Similar Compounds

| Name               | ANTHRAQUINONE; 1-AMINO-4-HYDROXY-2-PHENOXY- | 1-AMINO-4-BENZOYLAMINO-ANTHRAQUINONE | 1-AMINO-4-HYDROXY-5-CHLORANTHRAQUINONE |
|--------------------|---------------------------------------------|--------------------------------------|----------------------------------------|
| Structure          |                                             |                                      |                                        |
| Actual Endpoint    | Mild                                        | Mild                                 | Mild                                   |
| Predicted Endpoint | Mild                                        | Mild                                 | Mild                                   |
| Distance           | 0.525                                       | 0.570                                | 0.635                                  |
| Reference          | 28ZPAK 239;72                               | 28ZPAK-;124;72                       | 28ZPAK-;83;72                          |

## Model Applicability

Unknown features are fingerprint features in the query molecule, but not found or appearing too infrequently in the training set.

1. All properties and OPS components are within expected ranges.
2. Unknown FCFP\_2 feature: -1151884458: [\*]N[c](:n:[\*]):[c](:[\*]):[\*]
3. Unknown FCFP\_2 feature: -885461129: [\*]NNC(=[\*])[\*]

## Feature Contribution

### Top features for positive contribution

| Fingerprint | Bit/Smiles  | Feature Structure               | Score | Moderate_Severe in training set |
|-------------|-------------|---------------------------------|-------|---------------------------------|
| FCFP_10     | -1374812327 | <br>[*]:n:[c](Cl):[c](:[*]):[*] | 0.186 | 1 out of 1                      |

|                                        |             |                                                                                                                                                  |        |                                    |
|----------------------------------------|-------------|--------------------------------------------------------------------------------------------------------------------------------------------------|--------|------------------------------------|
| FCFP_10                                | 3           | 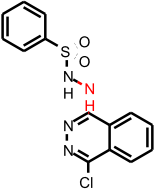<br>[*]N[*]                                                   | 0.165  | 383 out of 491                     |
| FCFP_10                                | 32          | <br>[*]Cl                                                     | 0.0821 | 145 out of 202                     |
| Top Features for negative contribution |             |                                                                                                                                                  |        |                                    |
| Fingerprint                            | Bit/Smiles  | Feature Structure                                                                                                                                | Score  | Moderate_Severe<br>in training set |
| FCFP_10                                | 4427049     | <br>[*][c](:[*]):n:n:[*]                                      | -1.29  | 0 out of 4                         |
| FCFP_10                                | 1294344583  | <br>[*]NN[c](:[*]):[*]                                       | -0.507 | 0 out of 1                         |
| FCFP_10                                | -1320007763 | <br>[*][c](:[*]):[c]1:[cH]<br>]:[cH]:[cH]:[*]:[c]:<br>1:[*] | -0.316 | 19 out of 40                       |

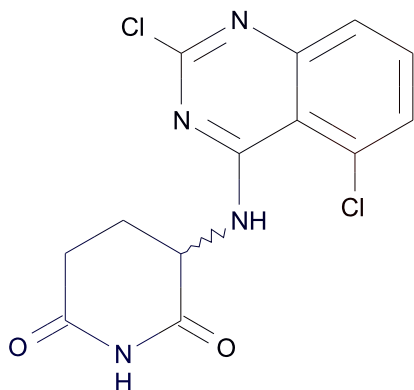
 $C_{13}H_{10}Cl_2N_4O_2$ 

Molecular Weight: 325.15009

ALogP: 2.49

Rotatable Bonds: 2

Acceptors: 5

Donors: 2

## Model Prediction

Prediction: Moderate

Probability: 0.581

Enrichment: 0.938

Bayesian Score: -2.63

Mahalanobis Distance: 10.3

Mahalanobis Distance p-value: 0.0189

Prediction: Positive if the Bayesian score is above the estimated best cutoff value from minimizing the false positive and false negative rate.

Probability: The estimated probability that the sample is in the positive category. This assumes that the Bayesian score follows a normal distribution and is different from the prediction using a cutoff.

Enrichment: An estimate of enrichment, that is, the increased likelihood (versus random) of this sample being in the category.

Bayesian Score: The standard Laplacian-modified Bayesian score.

Mahalanobis Distance: The Mahalanobis distance (MD) is the distance to the center of the training data. The larger the MD, the less trustworthy the prediction.

Mahalanobis Distance p-value: The p-value gives the fraction of training data with an MD greater than or equal to the one for the given sample, assuming normally distributed data. The smaller the p-value, the less trustworthy the prediction. For highly non-normal X properties (e.g., fingerprints), the MD p-value is wildly inaccurate.

## Structural Similar Compounds

| Name               | 5-NORBORNENE-2;3-DICARBOXYLIC ACID; 1;4;5;6;7;7-HEXACHLORO- | s-TRIAZINE; 2-CHLORO-4-ETHYLAMINO-6-ISOPROPYLAMINO- | 2-NAPHTHALENESULFONIC ACID;5-AMINO-6-ETHOXY- |
|--------------------|-------------------------------------------------------------|-----------------------------------------------------|----------------------------------------------|
| Structure          |                                                             |                                                     |                                              |
| Actual Endpoint    | Severe                                                      | Severe                                              | Moderate                                     |
| Predicted Endpoint | Severe                                                      | Moderate                                            | Moderate                                     |
| Distance           | 0.624                                                       | 0.644                                               | 0.660                                        |
| Reference          | 28ZPAK-;92;72                                               | CIGET* -;77                                         | 28ZPAK-;191;72                               |

## Model Applicability

Unknown features are fingerprint features in the query molecule, but not found or appearing too infrequently in the training set.

1. All properties and OPS components are within expected ranges.

## Feature Contribution

| Top features for positive contribution |            |                           |       |                        |
|----------------------------------------|------------|---------------------------|-------|------------------------|
| Fingerprint                            | Bit/Smiles | Feature Structure         | Score | Severe in training set |
| SCFP_12                                | 1631785938 | <br>[*]C(=[*])NC(=[*])[*] | 0.218 | 1 out of 1             |

|                                        |             |                                                                                                                                                   |        |                        |
|----------------------------------------|-------------|---------------------------------------------------------------------------------------------------------------------------------------------------|--------|------------------------|
| SCFP_12                                | 622342378   | 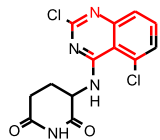<br>[*][c]1:[*]:[c]([*]):[c]2:[c]([*]):[*]:[cH]:[cH]:[c]:2:n:1 | 0.213  | 4 out of 5             |
| SCFP_12                                | 403834996   | <br>[*][c]1:[*]:[c]([*]):[c]2:[c]([*]):[cH]:[cH]:[c]:2:n:1     | 0.213  | 4 out of 5             |
| Top Features for negative contribution |             |                                                                                                                                                   |        |                        |
| Fingerprint                            | Bit/Smiles  | Feature Structure                                                                                                                                 | Score  | Severe in training set |
| SCFP_12                                | -1072897324 | <br>[*]C1[*]NC(=O)CC1                                          | -0.8   | 3 out of 13            |
| SCFP_12                                | 1256995004  | <br>[*]CC(=O)N[*]                                             | -0.483 | 12 out of 33           |
| SCFP_12                                | 18117904    | <br>[*]C([*])N[c](:[*]):[*]                                  | -0.481 | 3 out of 9             |

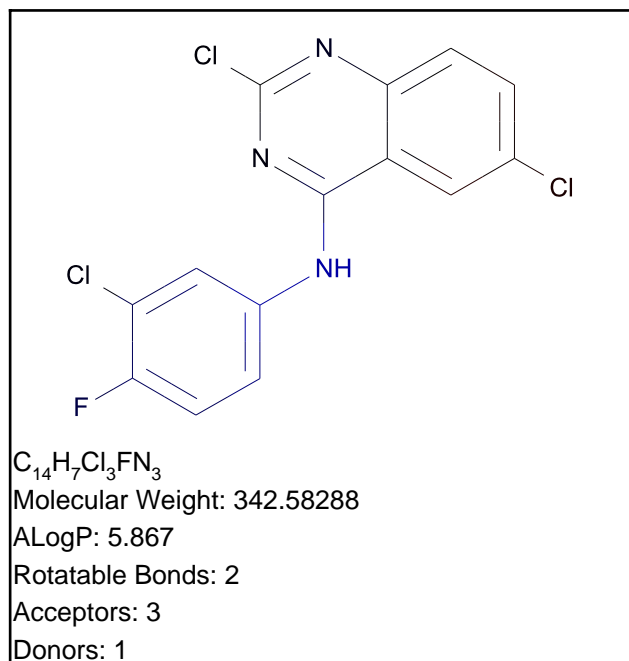

## Model Prediction

Prediction: Moderate

Probability: 0.479

Enrichment: 0.772

Bayesian Score: -4.46

Mahalanobis Distance: 5.84

Mahalanobis Distance p-value: 1

Prediction: Positive if the Bayesian score is above the estimated best cutoff value from minimizing the false positive and false negative rate.

Probability: The estimated probability that the sample is in the positive category. This assumes that the Bayesian score follows a normal distribution and is different from the prediction using a cutoff.

Enrichment: An estimate of enrichment, that is, the increased likelihood (versus random) of this sample being in the category.

Bayesian Score: The standard Laplacian-modified Bayesian score.

Mahalanobis Distance: The Mahalanobis distance (MD) is the distance to the center of the training data. The larger the MD, the less trustworthy the prediction.

Mahalanobis Distance p-value: The p-value gives the fraction of training data with an MD greater than or equal to the one for the given sample, assuming normally distributed data. The smaller the p-value, the less trustworthy the prediction. For highly non-normal X properties (e.g., fingerprints), the MD p-value is wildly inaccurate.

## Structural Similar Compounds

| Name               | ANTHRAQUINONE;1-(2;4;6-TRIMETHYLPHENYLAMIN O)-                                      | BENZILIC ACID; 4;4'-DICHLORO-; ISOPROPYL ESTER                                      | 2';6'-Acetoxylidide; 2-(p-chlorobenzyl(2-(pyrrolidiny)ethyl)amino)-;                |
|--------------------|-------------------------------------------------------------------------------------|-------------------------------------------------------------------------------------|-------------------------------------------------------------------------------------|
| Structure          | 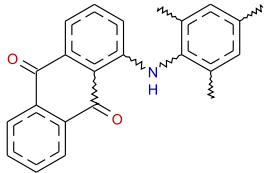 |  |  |
| Actual Endpoint    | Moderate                                                                            | Severe                                                                              | Severe                                                                              |
| Predicted Endpoint | Moderate                                                                            | Severe                                                                              | Severe                                                                              |
| Distance           | 0.484                                                                               | 0.615                                                                               | 0.704                                                                               |
| Reference          | 28ZPAK-;242;72                                                                      | CIGET* -;77                                                                         | Arzneimittel-Forschung 9;167;59                                                     |

## Model Applicability

Unknown features are fingerprint features in the query molecule, but not found or appearing too infrequently in the training set.

1. All properties and OPS components are within expected ranges.

## Feature Contribution

### Top features for positive contribution

| Fingerprint | Bit/Smiles | Feature Structure                                                                                                                                                | Score | Severe in training set |
|-------------|------------|------------------------------------------------------------------------------------------------------------------------------------------------------------------|-------|------------------------|
| SCFP_12     | 622342378  | 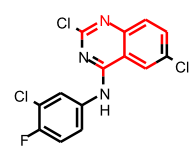<br><chem>[*][c]1:[*]:[c]([*]):[c]2:[c]([*]):[*]:[cH]:[cH]:[c]:2:n:1</chem> | 0.213 | 4 out of 5             |

|                                        |             |                                                                                                                                                        |        |                        |
|----------------------------------------|-------------|--------------------------------------------------------------------------------------------------------------------------------------------------------|--------|------------------------|
| SCFP_12                                | -1378360678 | 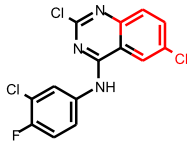<br><chem>[*]:[c]1:[*]:[cH]:[cH]:[cH]:[c]:1Cl</chem>                | 0.211  | 22 out of 29           |
| SCFP_12                                | -116109291  | <br><chem>[*]:[c]1:[*]:[cH]:[cH]:[c](Cl):[cH]:1</chem>              | 0.174  | 19 out of 26           |
| Top Features for negative contribution |             |                                                                                                                                                        |        |                        |
| Fingerprint                            | Bit/Smiles  | Feature Structure                                                                                                                                      | Score  | Severe in training set |
| SCFP_12                                | 951581613   | <br><chem>[*]:[c](:[*])N[c](:[*]):[*]]:[*]</chem>                   | -0.769 | 2 out of 9             |
| SCFP_12                                | 1334669481  | <br><chem>[*]N[c](:[cH]:[*]):[cH]:[*]</chem>                       | -0.685 | 28 out of 93           |
| SCFP_12                                | -300914917  | <br><chem>[*][c]1:[*]:[cH]:[cH]:[c](N[c](:[*]):[*]):[cH]:1</chem> | -0.561 | 2 out of 7             |

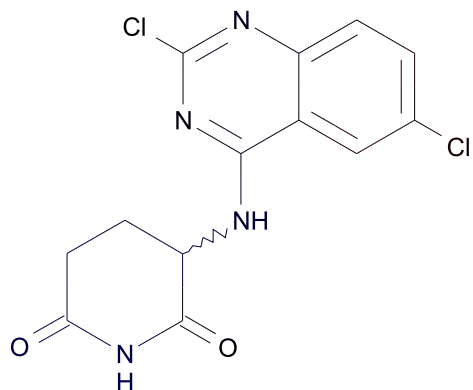
 $C_{13}H_{10}Cl_2N_4O_2$ 

Molecular Weight: 325.15009

ALogP: 2.49

Rotatable Bonds: 2

Acceptors: 5

Donors: 2

## Model Prediction

Prediction: Moderate

Probability: 0.579

Enrichment: 0.934

Bayesian Score: -2.67

Mahalanobis Distance: 10.3

Mahalanobis Distance p-value: 0.0189

Prediction: Positive if the Bayesian score is above the estimated best cutoff value from minimizing the false positive and false negative rate.

Probability: The estimated probability that the sample is in the positive category. This assumes that the Bayesian score follows a normal distribution and is different from the prediction using a cutoff.

Enrichment: An estimate of enrichment, that is, the increased likelihood (versus random) of this sample being in the category.

Bayesian Score: The standard Laplacian-modified Bayesian score.

Mahalanobis Distance: The Mahalanobis distance (MD) is the distance to the center of the training data. The larger the MD, the less trustworthy the prediction.

Mahalanobis Distance p-value: The p-value gives the fraction of training data with an MD greater than or equal to the one for the given sample, assuming normally distributed data. The smaller the p-value, the less trustworthy the prediction. For highly non-normal X properties (e.g., fingerprints), the MD p-value is wildly inaccurate.

## Structural Similar Compounds

| Name               | 5-NORBORNENE-2;3-DICARBOXYLIC ACID; 1;4;5;6;7;7-HEXACHLORO- | s-TRIAZINE; 2-CHLORO-4-ETHYLAMINO-6-ISOPROPYLAMINO- | 2-NAPHTHALENESULFONIC ACID;5-AMINO-6-ETHOXY- |
|--------------------|-------------------------------------------------------------|-----------------------------------------------------|----------------------------------------------|
| Structure          |                                                             |                                                     |                                              |
| Actual Endpoint    | Severe                                                      | Severe                                              | Moderate                                     |
| Predicted Endpoint | Severe                                                      | Moderate                                            | Moderate                                     |
| Distance           | 0.624                                                       | 0.645                                               | 0.660                                        |
| Reference          | 28ZPAK-;92;72                                               | CIGET* -;77                                         | 28ZPAK-;191;72                               |

## Model Applicability

Unknown features are fingerprint features in the query molecule, but not found or appearing too infrequently in the training set.

1. All properties and OPS components are within expected ranges.

## Feature Contribution

### Top features for positive contribution

| Fingerprint | Bit/Smiles | Feature Structure                      | Score | Severe in training set |
|-------------|------------|----------------------------------------|-------|------------------------|
| SCFP_12     | 1631785938 | <br><chem>[*]C(=[*])NC(=[*])[*]</chem> | 0.218 | 1 out of 1             |

|                                        |             |                                                                                                                                                                |        |                        |
|----------------------------------------|-------------|----------------------------------------------------------------------------------------------------------------------------------------------------------------|--------|------------------------|
| SCFP_12                                | 622342378   | 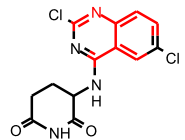<br><chem>[*][c]1:[*]:[c]([*]):[c]2:[c]([*]):[*]:[cH]:[cH]:[c]:2:n:1</chem> | 0.213  | 4 out of 5             |
| SCFP_12                                | -1378360678 | <br><chem>[*]:[c]1:[*]:[cH]:[cH]:[cH]:[c]:1Cl</chem>                        | 0.211  | 22 out of 29           |
| Top Features for negative contribution |             |                                                                                                                                                                |        |                        |
| Fingerprint                            | Bit/Smiles  | Feature Structure                                                                                                                                              | Score  | Severe in training set |
| SCFP_12                                | -1072897324 | <br><chem>[*]C1[*]NC(=O)CC1</chem>                                          | -0.8   | 3 out of 13            |
| SCFP_12                                | 1256995004  | <br><chem>[*]CC(=O)N[*]</chem>                                             | -0.483 | 12 out of 33           |
| SCFP_12                                | 18117904    | <br><chem>[*]C([*])N[c](:[*]):[*]</chem>                                  | -0.481 | 3 out of 9             |

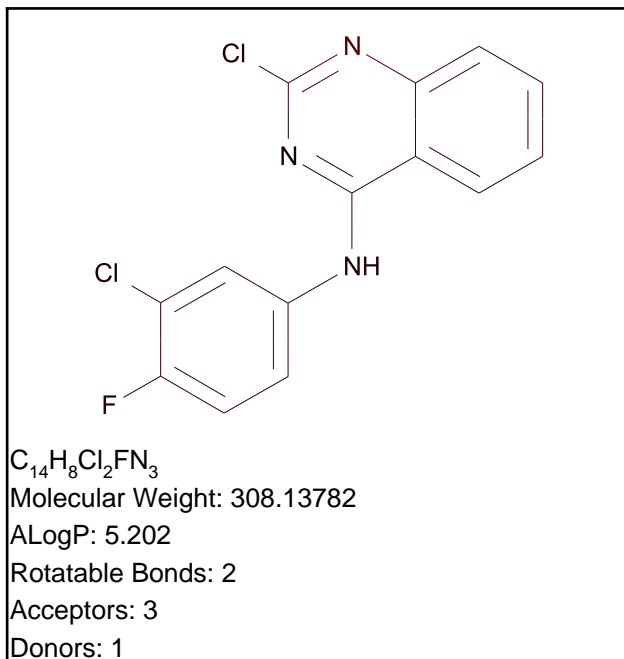

## Model Prediction

Prediction: Irritant

Probability: 1

Enrichment: 1.18

Bayesian Score: 3.13

Mahalanobis Distance: 6.09

Mahalanobis Distance p-value: 1

Prediction: Positive if the Bayesian score is above the estimated best cutoff value from minimizing the false positive and false negative rate.

Probability: The estimated probability that the sample is in the positive category. This assumes that the Bayesian score follows a normal distribution and is different from the prediction using a cutoff.

Enrichment: An estimate of enrichment, that is, the increased likelihood (versus random) of this sample being in the category.

Bayesian Score: The standard Laplacian-modified Bayesian score.

Mahalanobis Distance: The Mahalanobis distance (MD) is the distance to the center of the training data. The larger the MD, the less trustworthy the prediction.

Mahalanobis Distance p-value: The p-value gives the fraction of training data with an MD greater than or equal to the one for the given sample, assuming normally distributed data. The smaller the p-value, the less trustworthy the prediction. For highly non-normal X properties (e.g., fingerprints), the MD p-value is wildly inaccurate.

## Structural Similar Compounds

| Name               | ANTHRAQUINONE;1-(2;4;6-TRIMETHYLPHENYLAMINO)-                                       | BENZILIC ACID; 4;4'-DICHLORO-; ISOPROPYL ESTER                                      | BENZAMIDE; N-(5-CHLORO-1-ANTHRAQUINONYL)-                                           |
|--------------------|-------------------------------------------------------------------------------------|-------------------------------------------------------------------------------------|-------------------------------------------------------------------------------------|
| Structure          | 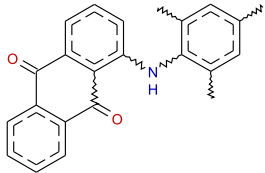 |  |  |
| Actual Endpoint    | Irritant                                                                            | Irritant                                                                            | Irritant                                                                            |
| Predicted Endpoint | Irritant                                                                            | Irritant                                                                            | Irritant                                                                            |
| Distance           | 0.545                                                                               | 0.563                                                                               | 0.599                                                                               |
| Reference          | 28ZPAK-;242;72                                                                      | CIGET* -;77                                                                         | 28ZPAK 89;72                                                                        |

## Model Applicability

Unknown features are fingerprint features in the query molecule, but not found or appearing too infrequently in the training set.

- All properties and OPS components are within expected ranges.
- Unknown FCFP\_2 feature: -1151884458: [\*]N[c](:n:[\*]):[c](:[\*]):[\*]

## Feature Contribution

| Top features for positive contribution |            |                                                                                                                                    |       |                          |
|----------------------------------------|------------|------------------------------------------------------------------------------------------------------------------------------------|-------|--------------------------|
| Fingerprint                            | Bit/Smiles | Feature Structure                                                                                                                  | Score | Irritant in training set |
| FCFP_12                                | 1747237384 | 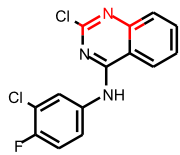<br><chem>[*][c](:[*]):n:[c](:[*]):[*]</chem> | 0.208 | 44 out of 44             |

|                                        |            |                                                                                                                                               |       |                          |
|----------------------------------------|------------|-----------------------------------------------------------------------------------------------------------------------------------------------|-------|--------------------------|
| FCFP_12                                | 178336375  | 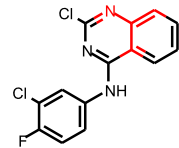<br><chem>[*]:[cH]:[c](:n:[*]):[c](:[*]):[*]</chem>        | 0.202 | 19 out of 19             |
| FCFP_12                                | 713358128  | <br><chem>[*]:n:[c]1:[cH]:[cH]:[cH]:[*]:[c]:1:[*]</chem>   | 0.2   | 17 out of 17             |
| Top Features for negative contribution |            |                                                                                                                                               |       |                          |
| Fingerprint                            | Bit/Smiles | Feature Structure                                                                                                                             | Score | Irritant in training set |
| FCFP_12                                | 307419094  | <br><chem>[*][c](:[*]):[c](:[cH]:[*]):[c](:[*]):[*]</chem> | 0     | 43 out of 52             |
| FCFP_12                                | -773983804 | <br><chem>[*]N[c]1:[cH]:[*]:[c]([*]):[cH]:[cH]:1</chem>  | 0     | 102 out of 121           |
| FCFP_12                                | 991735244  | <br><chem>[*]:[c]1:[*]:[cH]:[cH]:[cH]:[cH]:1</chem>      | 0     | 237 out of 291           |

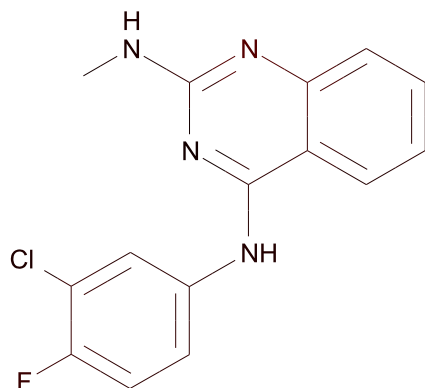

$C_{15}H_{12}ClFN_4$

Molecular Weight: 302.73398

ALogP: 4.677

Rotatable Bonds: 3

Acceptors: 4

Donors: 2

## Model Prediction

**Prediction: Irritant**

Probability: 1

Enrichment: 1.18

Bayesian Score: 3.49

Mahalanobis Distance: 4.96

Mahalanobis Distance p-value: 1

Prediction: Positive if the Bayesian score is above the estimated best cutoff value from minimizing the false positive and false negative rate.

Probability: The estimated probability that the sample is in the positive category. This assumes that the Bayesian score follows a normal distribution and is different from the prediction using a cutoff.

Enrichment: An estimate of enrichment, that is, the increased likelihood (versus random) of this sample being in the category.

Bayesian Score: The standard Laplacian-modified Bayesian score.

Mahalanobis Distance: The Mahalanobis distance (MD) is the distance to the center of the training data. The larger the MD, the less trustworthy the prediction.

Mahalanobis Distance p-value: The p-value gives the fraction of training data with an MD greater than or equal to the one for the given sample, assuming normally distributed data. The smaller the p-value, the less trustworthy the prediction. For highly non-normal X properties (e.g., fingerprints), the MD p-value is wildly inaccurate.

## Structural Similar Compounds

| Name               | PHENOL;2;2'-METHYLENEBIS(4-CHLORO- | P-PHENYLENEDIAMINE; N;N'-DIPHENYL- | s-TRIAZINE; 2-CHLORO-4;6-BIS(ISOPROPYLAMINO)- |
|--------------------|------------------------------------|------------------------------------|-----------------------------------------------|
| Structure          |                                    |                                    |                                               |
| Actual Endpoint    | Irritant                           | Irritant                           | Irritant                                      |
| Predicted Endpoint | Irritant                           | Irritant                           | Irritant                                      |
| Distance           | 0.647                              | 0.674                              | 0.675                                         |
| Reference          | 28ZPAK-;82;72                      | 28ZPAK-;73;72                      | CIGET 77                                      |

## Model Applicability

Unknown features are fingerprint features in the query molecule, but not found or appearing too infrequently in the training set.

1. All properties and OPS components are within expected ranges.
2. Unknown FCFP\_2 feature: -1151884458: [\*]N[c](:n:[\*]):[c](:[\*]):[\*]

## Feature Contribution

### Top features for positive contribution

| Fingerprint | Bit/Smiles | Feature Structure                             | Score | Irritant in training set |
|-------------|------------|-----------------------------------------------|-------|--------------------------|
| FCFP_12     | 1747237384 | <br><chem>[*][c](:[*]):n:[c](:[*]):[*]</chem> | 0.208 | 44 out of 44             |

|                                        |            |                                                                                                                                       |       |                          |
|----------------------------------------|------------|---------------------------------------------------------------------------------------------------------------------------------------|-------|--------------------------|
| FCFP_12                                | 178336375  | 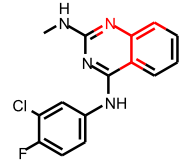<br>[*]:[cH]:[c](:n:[*]):<br>[c](:[*]):[*]         | 0.202 | 19 out of 19             |
| FCFP_12                                | 713358128  | <br>[*]:n:[c]1:[cH]:[cH]:<br>[cH]:[*]:[c]:1:[*]    | 0.2   | 17 out of 17             |
| Top Features for negative contribution |            |                                                                                                                                       |       |                          |
| Fingerprint                            | Bit/Smiles | Feature Structure                                                                                                                     | Score | Irritant in training set |
| FCFP_12                                | 307419094  | <br>[*][c](:[*]):[c](:[cH]<br>):[*]):[c](:[*]):[*] | 0     | 43 out of 52             |
| FCFP_12                                | 991735244  | <br>[*]:[c]1:[*]:[cH]:[cH]<br>]:[cH]:[cH]:1       | 0     | 237 out of 291           |
| FCFP_12                                | -773983804 | <br>[*]N[c]1:[cH]:[*]:[c]<br>([*]):[cH]:[cH]:1   | 0     | 102 out of 121           |

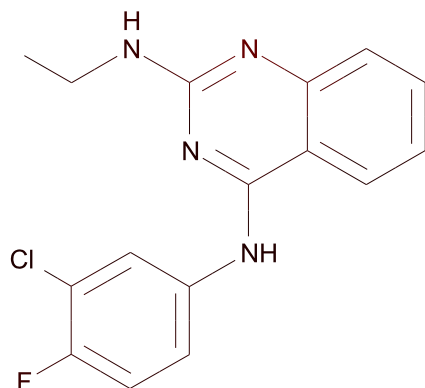

$C_{16}H_{14}ClFN_4$

Molecular Weight: 316.76056

ALogP: 5.025

Rotatable Bonds: 4

Acceptors: 4

Donors: 2

## Model Prediction

**Prediction:** Irritant

Probability: 1

Enrichment: 1.18

Bayesian Score: 3.53

Mahalanobis Distance: 5.94

Mahalanobis Distance p-value: 1

Prediction: Positive if the Bayesian score is above the estimated best cutoff value from minimizing the false positive and false negative rate.

Probability: The estimated probability that the sample is in the positive category. This assumes that the Bayesian score follows a normal distribution and is different from the prediction using a cutoff.

Enrichment: An estimate of enrichment, that is, the increased likelihood (versus random) of this sample being in the category.

Bayesian Score: The standard Laplacian-modified Bayesian score.

Mahalanobis Distance: The Mahalanobis distance (MD) is the distance to the center of the training data. The larger the MD, the less trustworthy the prediction.

Mahalanobis Distance p-value: The p-value gives the fraction of training data with an MD greater than or equal to the one for the given sample, assuming normally distributed data. The smaller the p-value, the less trustworthy the prediction. For highly non-normal X properties (e.g., fingerprints), the MD p-value is wildly inaccurate.

## Structural Similar Compounds

| Name               | PHENOL;2;2'-METHYLENEBIS(4-CHLORO- | P-PHENYLENEDIAMINE; N-PHENYL-N'-CYCLOHEXYL- | P-PHENYLENEDIAMINE; N;N'-DIPHENYL- |
|--------------------|------------------------------------|---------------------------------------------|------------------------------------|
| Structure          |                                    |                                             |                                    |
| Actual Endpoint    | Irritant                           | Irritant                                    | Irritant                           |
| Predicted Endpoint | Irritant                           | Irritant                                    | Irritant                           |
| Distance           | 0.665                              | 0.677                                       | 0.677                              |
| Reference          | 28ZPAK-;82;72                      | 28ZPAK-;73;72                               | 28ZPAK-;73;72                      |

## Model Applicability

Unknown features are fingerprint features in the query molecule, but not found or appearing too infrequently in the training set.

1. All properties and OPS components are within expected ranges.
2. Unknown FCFP\_2 feature: -1151884458: [\*]N[c](:n:[\*]):[c](:[\*]):[\*]

## Feature Contribution

### Top features for positive contribution

| Fingerprint | Bit/Smiles | Feature Structure                | Score | Irritant in training set |
|-------------|------------|----------------------------------|-------|--------------------------|
| FCFP_12     | 1747237384 | <br>[*][c](:[*]):n:[c](:[*]):[*] | 0.208 | 44 out of 44             |

|                                        |            |                                                                                                                                    |       |                          |
|----------------------------------------|------------|------------------------------------------------------------------------------------------------------------------------------------|-------|--------------------------|
| FCFP_12                                | 178336375  | 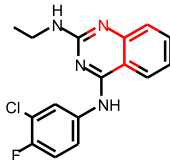<br>[*]:[cH]:[c](:n:[*]):<br>[c](:[*]):[*]      | 0.202 | 19 out of 19             |
| FCFP_12                                | 713358128  | <br>[*]:n:[c]1:[cH]:[cH]:<br>[cH]:[*]:[c]:1:[*] | 0.2   | 17 out of 17             |
| Top Features for negative contribution |            |                                                                                                                                    |       |                          |
| Fingerprint                            | Bit/Smiles | Feature Structure                                                                                                                  | Score | Irritant in training set |
| FCFP_12                                | 991735244  | <br>[*]:[c]1:[*]:[cH]:[cH]<br>:[cH]:[cH]:1      | 0     | 237 out of 291           |
| FCFP_12                                | -773983804 | <br>[*]N[c]1:[cH]:[*]:[c]<br>([*]):[cH]:[cH]:1 | 0     | 102 out of 121           |
| FCFP_12                                | 0          | <br>[*]C                                      | 0     | 1184 out of 1397         |

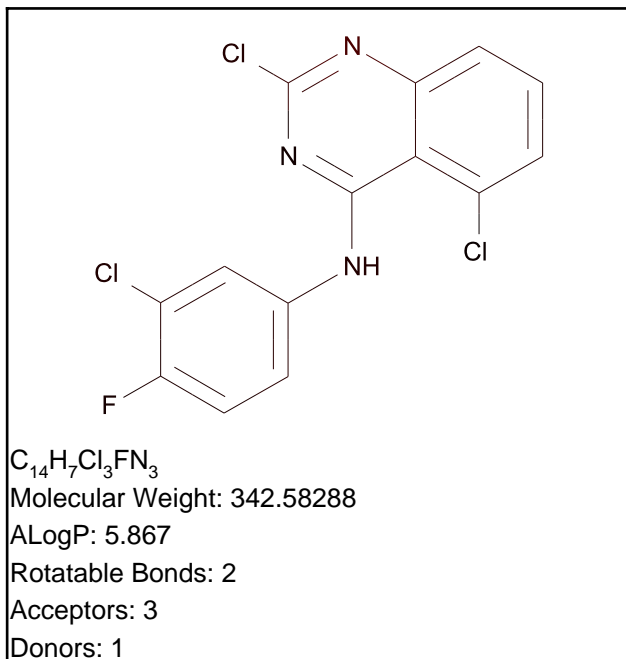

## Model Prediction

Prediction: Irritant

Probability: 1

Enrichment: 1.18

Bayesian Score: 2.64

Mahalanobis Distance: 6.25

Mahalanobis Distance p-value: 1

Prediction: Positive if the Bayesian score is above the estimated best cutoff value from minimizing the false positive and false negative rate.

Probability: The estimated probability that the sample is in the positive category. This assumes that the Bayesian score follows a normal distribution and is different from the prediction using a cutoff.

Enrichment: An estimate of enrichment, that is, the increased likelihood (versus random) of this sample being in the category.

Bayesian Score: The standard Laplacian-modified Bayesian score.

Mahalanobis Distance: The Mahalanobis distance (MD) is the distance to the center of the training data. The larger the MD, the less trustworthy the prediction.

Mahalanobis Distance p-value: The p-value gives the fraction of training data with an MD greater than or equal to the one for the given sample, assuming normally distributed data. The smaller the p-value, the less trustworthy the prediction. For highly non-normal X properties (e.g., fingerprints), the MD p-value is wildly inaccurate.

## Structural Similar Compounds

| Name               | ANTHRAQUINONE;1-(2;4;6-TRIMETHYLPHENYLAMINO)-                                       | BENZILIC ACID; 4;4'-DICHLORO-; ISOPROPYL ESTER                                      | BENZAMIDE; N-(5-CHLORO-1-ANTHRAQUINONYL)-                                           |
|--------------------|-------------------------------------------------------------------------------------|-------------------------------------------------------------------------------------|-------------------------------------------------------------------------------------|
| Structure          | 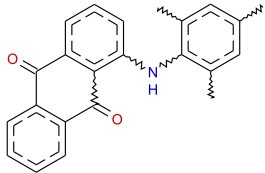 |  |  |
| Actual Endpoint    | Irritant                                                                            | Irritant                                                                            | Irritant                                                                            |
| Predicted Endpoint | Irritant                                                                            | Irritant                                                                            | Irritant                                                                            |
| Distance           | 0.476                                                                               | 0.593                                                                               | 0.628                                                                               |
| Reference          | 28ZPAK-;242;72                                                                      | CIGET* -;77                                                                         | 28ZPAK 89;72                                                                        |

## Model Applicability

Unknown features are fingerprint features in the query molecule, but not found or appearing too infrequently in the training set.

- All properties and OPS components are within expected ranges.
- Unknown FCFP\_2 feature: -1151884458: [\*]N[c](:n:[\*]):[c](:[\*]):[\*]

## Feature Contribution

| Top features for positive contribution |            |                                                                                                                                    |       |                          |
|----------------------------------------|------------|------------------------------------------------------------------------------------------------------------------------------------|-------|--------------------------|
| Fingerprint                            | Bit/Smiles | Feature Structure                                                                                                                  | Score | Irritant in training set |
| FCFP_12                                | 1747237384 | 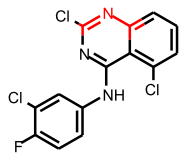<br><chem>[*][c](:[*]):n:[c](:[*]):[*]</chem> | 0.208 | 44 out of 44             |

|                                        |            |                                                                                                                                                       |        |                          |
|----------------------------------------|------------|-------------------------------------------------------------------------------------------------------------------------------------------------------|--------|--------------------------|
| FCFP_12                                | 178336375  | 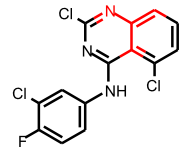<br><chem>[*]:[cH]:[c](:n:[*]):[c](:[*]):[*]</chem>                | 0.202  | 19 out of 19             |
| FCFP_12                                | 713358128  | <br><chem>[*]:n:[c]1:[cH]:[cH]:[cH]:[*]:[c]:1:[*]</chem>           | 0.2    | 17 out of 17             |
| Top Features for negative contribution |            |                                                                                                                                                       |        |                          |
| Fingerprint                            | Bit/Smiles | Feature Structure                                                                                                                                     | Score  | Irritant in training set |
| FCFP_12                                | 1237732457 | <br><chem>[*][c](:[*]):[c]1:[c](Cl):[cH]:[cH]:[*]:[c]:1:[*]</chem> | -0.132 | 2 out of 3               |
| FCFP_12                                | 991735244  | <br><chem>[*]:[c]1:[*]:[cH]:[cH]:[cH]:[cH]:1</chem>              | 0      | 237 out of 291           |
| FCFP_12                                | -773983804 | <br><chem>[*]N[c]1:[cH]:[*]:[c]([*]):[cH]:[cH]:1</chem>          | 0      | 102 out of 121           |

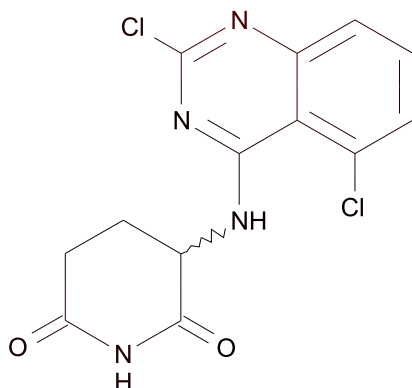
 $C_{13}H_{10}Cl_2N_4O_2$ 

Molecular Weight: 325.15009

ALogP: 2.49

Rotatable Bonds: 2

Acceptors: 5

Donors: 2

## Model Prediction

**Prediction: Irritant**

Probability: 1

Enrichment: 1.18

Bayesian Score: 2.85

Mahalanobis Distance: 6.88

Mahalanobis Distance p-value: 0.999

Prediction: Positive if the Bayesian score is above the estimated best cutoff value from minimizing the false positive and false negative rate.

Probability: The estimated probability that the sample is in the positive category. This assumes that the Bayesian score follows a normal distribution and is different from the prediction using a cutoff.

Enrichment: An estimate of enrichment, that is, the increased likelihood (versus random) of this sample being in the category.

Bayesian Score: The standard Laplacian-modified Bayesian score.

Mahalanobis Distance: The Mahalanobis distance (MD) is the distance to the center of the training data. The larger the MD, the less trustworthy the prediction.

Mahalanobis Distance p-value: The p-value gives the fraction of training data with an MD greater than or equal to the one for the given sample, assuming normally distributed data. The smaller the p-value, the less trustworthy the prediction. For highly non-normal X properties (e.g., fingerprints), the MD p-value is wildly inaccurate.

## Structural Similar Compounds

| Name               | ANTHRAQUINONE; 1-AMINO-4-HYDROXY-2-PHENOXY- | Anthraquinone; 1-amino-2-bromo-4-hydroxy-                              | 1-AMINO-4-BENZOYLAMINO-ANTHRAQUINONE |
|--------------------|---------------------------------------------|------------------------------------------------------------------------|--------------------------------------|
| Structure          |                                             |                                                                        |                                      |
| Actual Endpoint    | Irritant                                    | Non-Irritant                                                           | Irritant                             |
| Predicted Endpoint | Irritant                                    | Non-Irritant                                                           | Irritant                             |
| Distance           | 0.552                                       | 0.562                                                                  | 0.567                                |
| Reference          | 28ZPAK 239;72                               | Prehled Prumyslove Toxikologie; Organicke Latky; Marhold; J. pp 535;86 | 28ZPAK-;124;72                       |

## Model Applicability

Unknown features are fingerprint features in the query molecule, but not found or appearing too infrequently in the training set.

1. All properties and OPS components are within expected ranges.
2. Unknown FCFP\_2 feature: -1151884458: [\*]N[c](:n:[\*]):[c](:[\*]):[\*]

## Feature Contribution

### Top features for positive contribution

| Fingerprint | Bit/Smiles | Feature Structure                | Score | Irritant in training set |
|-------------|------------|----------------------------------|-------|--------------------------|
| FCFP_12     | 1747237384 | <br>[*][c](:[*]):n:[c](:[*]):[*] | 0.208 | 44 out of 44             |

| FCFP_12                                | 178336375  | 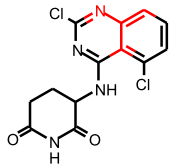<br><chem>[*]:[cH]:[c](:n:[*]):[c](:[*]):[*]</chem>                | 0.202  | 19 out of 19             |
|----------------------------------------|------------|-------------------------------------------------------------------------------------------------------------------------------------------------------|--------|--------------------------|
| FCFP_12                                | 713358128  | <br><chem>[*]:n:[c]1:[cH]:[cH]:[cH]:[*]:[c]:1:[*]</chem>           | 0.2    | 17 out of 17             |
| Top Features for negative contribution |            |                                                                                                                                                       |        |                          |
| Fingerprint                            | Bit/Smiles | Feature Structure                                                                                                                                     | Score  | Irritant in training set |
| FCFP_12                                | 1237732457 | <br><chem>[*][c](:[*]):[c]1:[c](Cl):[cH]:[cH]:[*]:[c]:1:[*]</chem> | -0.132 | 2 out of 3               |
| FCFP_12                                | 1          | <br><chem>[*]=O</chem>                                            | 0      | 872 out of 1051          |
| FCFP_12                                | 991735244  | <br><chem>[*]:[c]1:[*]:[cH]:[cH]:[cH]:[cH]:1</chem>              | 0      | 237 out of 291           |

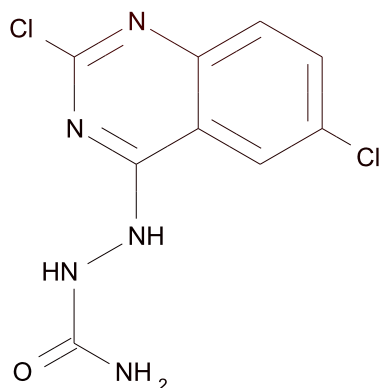

$C_9H_7Cl_2N_5O$

Molecular Weight: 272.09078

ALogP: 2.379

Rotatable Bonds: 2

Acceptors: 4

Donors: 3

## Model Prediction

Prediction: Irritant

Probability: 1

Enrichment: 1.18

Bayesian Score: 2.46

Mahalanobis Distance: 4.47

Mahalanobis Distance p-value: 1

Prediction: Positive if the Bayesian score is above the estimated best cutoff value from minimizing the false positive and false negative rate.

Probability: The estimated probability that the sample is in the positive category. This assumes that the Bayesian score follows a normal distribution and is different from the prediction using a cutoff.

Enrichment: An estimate of enrichment, that is, the increased likelihood (versus random) of this sample being in the category.

Bayesian Score: The standard Laplacian-modified Bayesian score.

Mahalanobis Distance: The Mahalanobis distance (MD) is the distance to the center of the training data. The larger the MD, the less trustworthy the prediction.

Mahalanobis Distance p-value: The p-value gives the fraction of training data with an MD greater than or equal to the one for the given sample, assuming normally distributed data. The smaller the p-value, the less trustworthy the prediction. For highly non-normal X properties (e.g., fingerprints), the MD p-value is wildly inaccurate.

## Structural Similar Compounds

| Name               | 2-NAPHTHALENESULFONIC ACID; 4-HYDROXY-7-(METHYLAMINO)- | 1;2;4-TRIHYDROXY ANTHRAQUINONE | Benzimidazole; 6-amino-2-(3'-aminophenyl)-; dihydrochloride           |
|--------------------|--------------------------------------------------------|--------------------------------|-----------------------------------------------------------------------|
| Structure          |                                                        |                                |                                                                       |
| Actual Endpoint    | Irritant                                               | Irritant                       | Irritant                                                              |
| Predicted Endpoint | Irritant                                               | Irritant                       | Irritant                                                              |
| Distance           | 0.575                                                  | 0.588                          | 0.605                                                                 |
| Reference          | 28ZPAK 190;72                                          | 28ZPAK-;103;7                  | Prehled Prumyslove Toxikologie; Organické Latky; Marhold; J. -;831;86 |

## Model Applicability

Unknown features are fingerprint features in the query molecule, but not found or appearing too infrequently in the training set.

1. All properties and OPS components are within expected ranges.
2. Unknown FCFP\_2 feature: -1151884458: [\*]N[c](:n:[\*]):[c](:[\*]):[\*]
3. Unknown FCFP\_2 feature: -885461129: [\*]NNC(=[\*])[\*]

## Feature Contribution

| Top features for positive contribution |            |                                  |       |                          |
|----------------------------------------|------------|----------------------------------|-------|--------------------------|
| Fingerprint                            | Bit/Smiles | Feature Structure                | Score | Irritant in training set |
| FCFP_12                                | 1747237384 | <br>[*][c](:[*]):n:[c](:[*]):[*] | 0.208 | 44 out of 44             |

|                                        |            |                                                                                                                                                 |       |                          |
|----------------------------------------|------------|-------------------------------------------------------------------------------------------------------------------------------------------------|-------|--------------------------|
| FCFP_12                                | 178336375  | 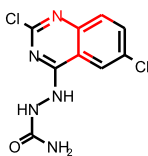<br><chem>[*]:[cH]:[c](:n:[*]):[c](:[*]):[*]</chem>          | 0.202 | 19 out of 19             |
| FCFP_12                                | 713358128  | <br><chem>[*]:n:[c]1:[cH]:[cH]:[cH]:[*]:[c]:1:[*]</chem>     | 0.2   | 17 out of 17             |
| Top Features for negative contribution |            |                                                                                                                                                 |       |                          |
| Fingerprint                            | Bit/Smiles | Feature Structure                                                                                                                               | Score | Irritant in training set |
| FCFP_12                                | 0          | <br><chem>[*]C</chem>                                        | 0     | 1184 out of 1397         |
| FCFP_12                                | 1          | <br><chem>[*]=O</chem>                                      | 0     | 872 out of 1051          |
| FCFP_12                                | 307419094  | <br><chem>[*][c](:[*]):[c](:[cH]:[*]):[c](:[*]):[*]</chem> | 0     | 43 out of 52             |

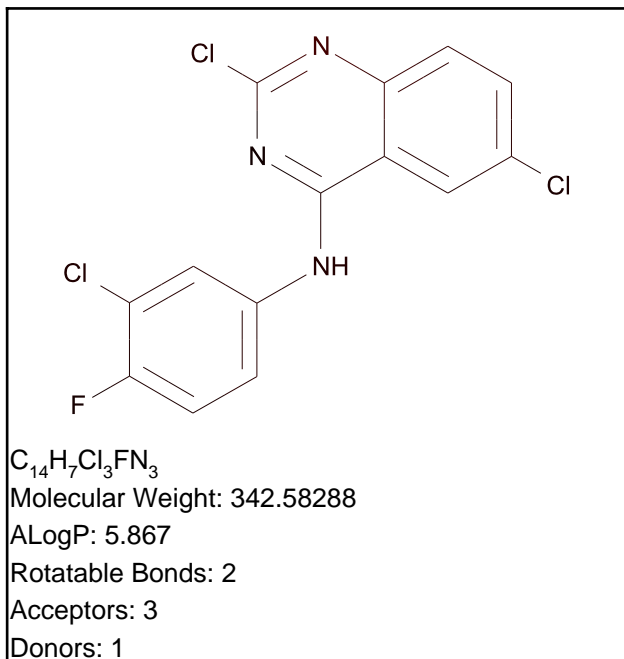

## Model Prediction

Prediction: Irritant

Probability: 1

Enrichment: 1.18

Bayesian Score: 2.8

Mahalanobis Distance: 6.25

Mahalanobis Distance p-value: 1

Prediction: Positive if the Bayesian score is above the estimated best cutoff value from minimizing the false positive and false negative rate.

Probability: The estimated probability that the sample is in the positive category. This assumes that the Bayesian score follows a normal distribution and is different from the prediction using a cutoff.

Enrichment: An estimate of enrichment, that is, the increased likelihood (versus random) of this sample being in the category.

Bayesian Score: The standard Laplacian-modified Bayesian score.

Mahalanobis Distance: The Mahalanobis distance (MD) is the distance to the center of the training data. The larger the MD, the less trustworthy the prediction.

Mahalanobis Distance p-value: The p-value gives the fraction of training data with an MD greater than or equal to the one for the given sample, assuming normally distributed data. The smaller the p-value, the less trustworthy the prediction. For highly non-normal X properties (e.g., fingerprints), the MD p-value is wildly inaccurate.

## Structural Similar Compounds

| Name               | ANTHRAQUINONE;1-(2;4;6-TRIMETHYLPHENYLAMINO)-                                       | BENZILIC ACID; 4;4'-DICHLORO-; ISOPROPYL ESTER                                      | BENZAMIDE; N-(5-CHLORO-1-ANTHRAQUINONYL)-                                           |
|--------------------|-------------------------------------------------------------------------------------|-------------------------------------------------------------------------------------|-------------------------------------------------------------------------------------|
| Structure          | 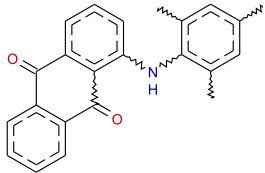 |  |  |
| Actual Endpoint    | Irritant                                                                            | Irritant                                                                            | Irritant                                                                            |
| Predicted Endpoint | Irritant                                                                            | Irritant                                                                            | Irritant                                                                            |
| Distance           | 0.481                                                                               | 0.587                                                                               | 0.633                                                                               |
| Reference          | 28ZPAK-;242;72                                                                      | CIGET* -;77                                                                         | 28ZPAK 89;72                                                                        |

## Model Applicability

Unknown features are fingerprint features in the query molecule, but not found or appearing too infrequently in the training set.

- All properties and OPS components are within expected ranges.
- Unknown FCFP\_2 feature: -1151884458: [\*]N[c](:n:[\*]):[c](:[\*]):[\*]

## Feature Contribution

| Top features for positive contribution |            |                                                                                                                                    |       |                          |
|----------------------------------------|------------|------------------------------------------------------------------------------------------------------------------------------------|-------|--------------------------|
| Fingerprint                            | Bit/Smiles | Feature Structure                                                                                                                  | Score | Irritant in training set |
| FCFP_12                                | 1747237384 | 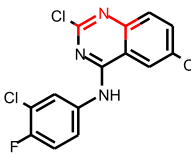<br><chem>[*][c](:[*]):n:[c](:[*]):[*]</chem> | 0.208 | 44 out of 44             |

|                                        |            |                                                                                                                                               |       |                          |
|----------------------------------------|------------|-----------------------------------------------------------------------------------------------------------------------------------------------|-------|--------------------------|
| FCFP_12                                | 178336375  | 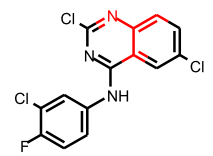<br><chem>[*]:[cH]:[c](:n:[*]):[c](:[*]):[*]</chem>        | 0.202 | 19 out of 19             |
| FCFP_12                                | 713358128  | <br><chem>[*]:n:[c]1:[cH]:[cH]:[cH]:[*]:[c]:1:[*]</chem>   | 0.2   | 17 out of 17             |
| Top Features for negative contribution |            |                                                                                                                                               |       |                          |
| Fingerprint                            | Bit/Smiles | Feature Structure                                                                                                                             | Score | Irritant in training set |
| FCFP_12                                | 307419094  | <br><chem>[*][c](:[*]):[c](:[cH]:[*]):[c](:[*]):[*]</chem> | 0     | 43 out of 52             |
| FCFP_12                                | -773983804 | <br><chem>[*]N[c]1:[cH]:[*]:[c]([*]):[cH]:[cH]:1</chem>   | 0     | 102 out of 121           |

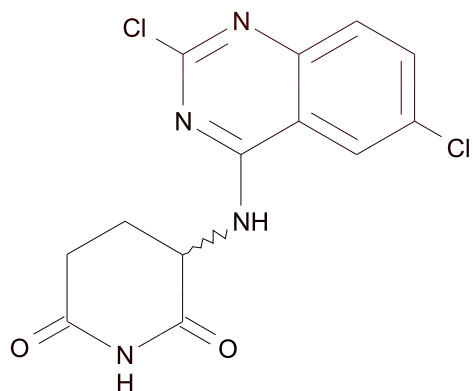
 $C_{13}H_{10}Cl_2N_4O_2$ 

Molecular Weight: 325.15009

ALogP: 2.49

Rotatable Bonds: 2

Acceptors: 5

Donors: 2

## Model Prediction

Prediction: Irritant

Probability: 1

Enrichment: 1.18

Bayesian Score: 3

Mahalanobis Distance: 6.88

Mahalanobis Distance p-value: 0.999

Prediction: Positive if the Bayesian score is above the estimated best cutoff value from minimizing the false positive and false negative rate.

Probability: The estimated probability that the sample is in the positive category. This assumes that the Bayesian score follows a normal distribution and is different from the prediction using a cutoff.

Enrichment: An estimate of enrichment, that is, the increased likelihood (versus random) of this sample being in the category.

Bayesian Score: The standard Laplacian-modified Bayesian score.

Mahalanobis Distance: The Mahalanobis distance (MD) is the distance to the center of the training data. The larger the MD, the less trustworthy the prediction.

Mahalanobis Distance p-value: The p-value gives the fraction of training data with an MD greater than or equal to the one for the given sample, assuming normally distributed data. The smaller the p-value, the less trustworthy the prediction. For highly non-normal X properties (e.g., fingerprints), the MD p-value is wildly inaccurate.

## Structural Similar Compounds

| Name               | ANTHRAQUINONE; 1-AMINO-4-HYDROXY-2-PHENOXY- | Anthraquinone; 1-amino-2-bromo-4-hydroxy-                              | 1-AMINO-4-BENZOYLAMINO-ANTHRAQUINONE |
|--------------------|---------------------------------------------|------------------------------------------------------------------------|--------------------------------------|
| Structure          |                                             |                                                                        |                                      |
| Actual Endpoint    | Irritant                                    | Non-Irritant                                                           | Irritant                             |
| Predicted Endpoint | Irritant                                    | Non-Irritant                                                           | Irritant                             |
| Distance           | 0.556                                       | 0.568                                                                  | 0.572                                |
| Reference          | 28ZPAK 239;72                               | Prehled Prumyslove Toxikologie; Organické Latky; Marhold; J. pp 535;86 | 28ZPAK-;124;72                       |

## Model Applicability

Unknown features are fingerprint features in the query molecule, but not found or appearing too infrequently in the training set.

1. All properties and OPS components are within expected ranges.
2. Unknown FCFP\_2 feature: -1151884458: [\*]N[c](:n:[\*]):[c](:[\*]):[\*]

## Feature Contribution

### Top features for positive contribution

| Fingerprint | Bit/Smiles | Feature Structure                | Score | Irritant in training set |
|-------------|------------|----------------------------------|-------|--------------------------|
| FCFP_12     | 1747237384 | <br>[*][c](:[*]):n:[c](:[*]):[*] | 0.208 | 44 out of 44             |

|                                        |             |                                                                                                                                                  |       |                          |
|----------------------------------------|-------------|--------------------------------------------------------------------------------------------------------------------------------------------------|-------|--------------------------|
| FCFP_12                                | 178336375   | 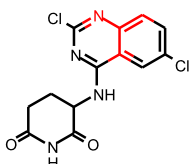<br><chem>[*]:[cH]:[c](:n:[*]):[c](:[*]):[*]</chem>           | 0.202 | 19 out of 19             |
| FCFP_12                                | 713358128   | <br><chem>[*]:n:[c]1:[cH]:[cH]:[cH]:[cH]:[*]:[c]:1:[*]</chem> | 0.2   | 17 out of 17             |
| Top Features for negative contribution |             |                                                                                                                                                  |       |                          |
| Fingerprint                            | Bit/Smiles  | Feature Structure                                                                                                                                | Score | Irritant in training set |
| FCFP_12                                | 1           | <br><chem>[*]=O</chem>                                        | 0     | 872 out of 1051          |
| FCFP_12                                | 307419094   | <br><chem>[*][c](:[*]):[c](:[cH]:[*]):[c](:[*]):[*]</chem>   | 0     | 43 out of 52             |
| FCFP_12                                | -1272798659 | <br><chem>[*]CCC([*])[*]</chem>                             | 0     | 517 out of 643           |

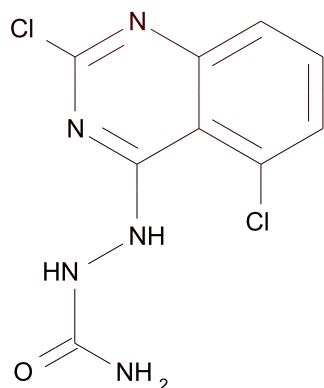

$C_9H_7Cl_2N_5O$

Molecular Weight: 272.09077

ALogP: 2.379

Rotatable Bonds: 2

Acceptors: 4

Donors: 3

## Model Prediction

Prediction: Irritant

Probability: 1

Enrichment: 1.18

Bayesian Score: 2.3

Mahalanobis Distance: 4.47

Mahalanobis Distance p-value: 1

Prediction: Positive if the Bayesian score is above the estimated best cutoff value from minimizing the false positive and false negative rate.

Probability: The estimated probability that the sample is in the positive category. This assumes that the Bayesian score follows a normal distribution and is different from the prediction using a cutoff.

Enrichment: An estimate of enrichment, that is, the increased likelihood (versus random) of this sample being in the category.

Bayesian Score: The standard Laplacian-modified Bayesian score.

Mahalanobis Distance: The Mahalanobis distance (MD) is the distance to the center of the training data. The larger the MD, the less trustworthy the prediction.

Mahalanobis Distance p-value: The p-value gives the fraction of training data with an MD greater than or equal to the one for the given sample, assuming normally distributed data. The smaller the p-value, the less trustworthy the prediction. For highly non-normal X properties (e.g., fingerprints), the MD p-value is wildly inaccurate.

## Structural Similar Compounds

| Name               | 2-NAPHTHALENESULFONIC ACID; 4-HYDROXY-7-(METHYLAMINO)- | 1;2;4-TRIHYDROXY ANTHRAQUINONE | Benzimidazole; 6-amino-2-(3'-aminophenyl)-; dihydrochloride           |
|--------------------|--------------------------------------------------------|--------------------------------|-----------------------------------------------------------------------|
| Structure          |                                                        |                                |                                                                       |
| Actual Endpoint    | Irritant                                               | Irritant                       | Irritant                                                              |
| Predicted Endpoint | Irritant                                               | Irritant                       | Irritant                                                              |
| Distance           | 0.574                                                  | 0.582                          | 0.599                                                                 |
| Reference          | 28ZPAK 190;72                                          | 28ZPAK-;103;7                  | Prehled Prumyslove Toxikologie; Organické Latky; Marhold; J. -;831;86 |

## Model Applicability

Unknown features are fingerprint features in the query molecule, but not found or appearing too infrequently in the training set.

1. All properties and OPS components are within expected ranges.
2. Unknown FCFP\_2 feature: -1151884458: [\*]N[c](:n:[\*]):[c](:[\*]):[\*]
3. Unknown FCFP\_2 feature: -885461129: [\*]NNC(=[\*])[\*]

## Feature Contribution

| Top features for positive contribution |            |                                  |       |                          |
|----------------------------------------|------------|----------------------------------|-------|--------------------------|
| Fingerprint                            | Bit/Smiles | Feature Structure                | Score | Irritant in training set |
| FCFP_12                                | 1747237384 | <br>[*][c](:[*]):n:[c](:[*]):[*] | 0.208 | 44 out of 44             |

| FCFP_12                                | 178336375  | <br><chem>[*]:[cH]:[c](:n:[*]):[c](:[*]):[*]</chem>                | 0.202  | 19 out of 19             |
|----------------------------------------|------------|-------------------------------------------------------------------------------------------------------------------------------------------------------|--------|--------------------------|
| FCFP_12                                | 713358128  | <br><chem>[*]:n:[c]1:[cH]:[cH]:[cH]:[cH]:[*]:[c]:1:[*]</chem>      | 0.2    | 17 out of 17             |
| Top Features for negative contribution |            |                                                                                                                                                       |        |                          |
| Fingerprint                            | Bit/Smiles | Feature Structure                                                                                                                                     | Score  | Irritant in training set |
| FCFP_12                                | 1237732457 | <br><chem>[*][c](:[*]):[c]1:[c](Cl):[cH]:[cH]:[*]:[c]:1:[*]</chem> | -0.132 | 2 out of 3               |
| FCFP_12                                | 1          | <br><chem>[*]=O</chem>                                            | 0      | 872 out of 1051          |
| FCFP_12                                | 307419094  | <br><chem>[*][c](:[*]):[c](:[cH]:[*]):[c](:[*]):[*]</chem>       | 0      | 43 out of 52             |

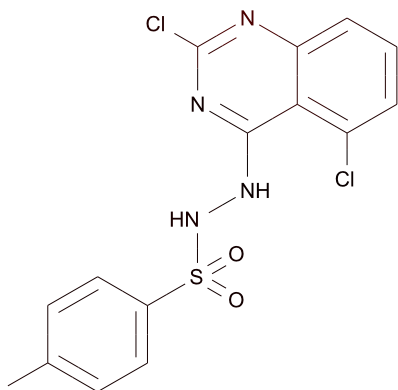

$C_{15}H_{12}Cl_2N_4O_2S$

Molecular Weight: 383.25237

ALogP: 4.443

Rotatable Bonds: 4

Acceptors: 5

Donors: 2

## Model Prediction

Prediction: Irritant

Probability: 1

Enrichment: 1.18

Bayesian Score: 2.72

Mahalanobis Distance: 3.95

Mahalanobis Distance p-value: 1

Prediction: Positive if the Bayesian score is above the estimated best cutoff value from minimizing the false positive and false negative rate.

Probability: The estimated probability that the sample is in the positive category. This assumes that the Bayesian score follows a normal distribution and is different from the prediction using a cutoff.

Enrichment: An estimate of enrichment, that is, the increased likelihood (versus random) of this sample being in the category.

Bayesian Score: The standard Laplacian-modified Bayesian score.

Mahalanobis Distance: The Mahalanobis distance (MD) is the distance to the center of the training data. The larger the MD, the less trustworthy the prediction.

Mahalanobis Distance p-value: The p-value gives the fraction of training data with an MD greater than or equal to the one for the given sample, assuming normally distributed data. The smaller the p-value, the less trustworthy the prediction. For highly non-normal X properties (e.g., fingerprints), the MD p-value is wildly inaccurate.

## Structural Similar Compounds

| Name               | ANTHRAQUINONE; 1-AMINO-4-HYDROXY-2-PHENOXY- | 1-AMINO-4-BENZOYLAMINO-ANTHRAQUINONE | 5-NORBORNENE-2;3-DICARBOXYLIC ACID; 1;4;5;6;7;7-HEXACHLORO- |
|--------------------|---------------------------------------------|--------------------------------------|-------------------------------------------------------------|
| Structure          |                                             |                                      |                                                             |
| Actual Endpoint    | Irritant                                    | Irritant                             | Irritant                                                    |
| Predicted Endpoint | Irritant                                    | Irritant                             | Irritant                                                    |
| Distance           | 0.605                                       | 0.651                                | 0.681                                                       |
| Reference          | 28ZPAK 239;72                               | 28ZPAK-;124;72                       | 28ZPAK-;92;72                                               |

## Model Applicability

Unknown features are fingerprint features in the query molecule, but not found or appearing too infrequently in the training set.

1. All properties and OPS components are within expected ranges.
2. Unknown FCFP\_2 feature: -1151884458: [\*]N[c](:n[\*]):[c](:[\*]):[\*]
3. Unknown FCFP\_2 feature: -885461129: [\*]NNC(=[\*])[\*]

## Feature Contribution

| Top features for positive contribution |            |                                               |       |                          |
|----------------------------------------|------------|-----------------------------------------------|-------|--------------------------|
| Fingerprint                            | Bit/Smiles | Feature Structure                             | Score | Irritant in training set |
| FCFP_12                                | 1747237384 | <br><chem>[*][c](:[*]):n:[c](:[*]):[*]</chem> | 0.208 | 44 out of 44             |

|                                        |            |                                                                                                                                                  |        |                          |
|----------------------------------------|------------|--------------------------------------------------------------------------------------------------------------------------------------------------|--------|--------------------------|
| FCFP_12                                | 178336375  | 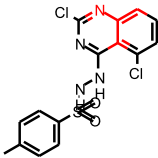<br>[*]:[cH]:[c](:n:[*]):<br>[c](:[*]):[*]                    | 0.202  | 19 out of 19             |
| FCFP_12                                | 713358128  | <br>[*]:n:[c]1:[cH]:[cH]:<br>[cH]:[*]:[c]:1:[*]               | 0.2    | 17 out of 17             |
| Top Features for negative contribution |            |                                                                                                                                                  |        |                          |
| Fingerprint                            | Bit/Smiles | Feature Structure                                                                                                                                | Score  | Irritant in training set |
| FCFP_12                                | 1237732457 | <br>[*][c](:[*]):[c]1:[c]<br>(Cl):[cH]:[cH]:[*]:[<br>c]:1:[*] | -0.132 | 2 out of 3               |
| FCFP_12                                | 1          | <br>[*]=O                                                    | 0      | 872 out of 1051          |
| FCFP_12                                | 307419094  | <br>[*][c](:[*]):[c](:cH<br>):[*]):[c](:[*]):[*]            | 0      | 43 out of 52             |

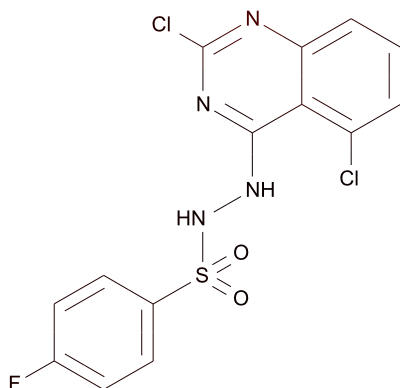

$C_{14}H_9Cl_2FN_4O_2S$

Molecular Weight: 387.21626

ALogP: 4.162

Rotatable Bonds: 4

Acceptors: 5

Donors: 2

## Model Prediction

**Prediction:** Irritant

Probability: 1

Enrichment: 1.18

Bayesian Score: 2.81

Mahalanobis Distance: 3.89

Mahalanobis Distance p-value: 1

Prediction: Positive if the Bayesian score is above the estimated best cutoff value from minimizing the false positive and false negative rate.

Probability: The estimated probability that the sample is in the positive category. This assumes that the Bayesian score follows a normal distribution and is different from the prediction using a cutoff.

Enrichment: An estimate of enrichment, that is, the increased likelihood (versus random) of this sample being in the category. Bayesian Score: The standard Laplacian-modified Bayesian score.

Mahalanobis Distance: The Mahalanobis distance (MD) is the distance to the center of the training data. The larger the MD, the less trustworthy the prediction.

Mahalanobis Distance p-value: The p-value gives the fraction of training data with an MD greater than or equal to the one for the given sample, assuming normally distributed data. The smaller the p-value, the less trustworthy the prediction. For highly non-normal X properties (e.g., fingerprints), the MD p-value is wildly inaccurate.

## Structural Similar Compounds

| Name               | ANTHRAQUINONE; 1-AMINO-4-HYDROXY-2-PHENOXY- | 1-AMINO-4-BENZOYLAMINO-ANTHRAQUINONE | 5-NORBORNENE-2;3-DICARBOXYLIC ACID; 1;4;5;6;7;7-HEXACHLORO- |
|--------------------|---------------------------------------------|--------------------------------------|-------------------------------------------------------------|
| Structure          |                                             |                                      |                                                             |
| Actual Endpoint    | Irritant                                    | Irritant                             | Irritant                                                    |
| Predicted Endpoint | Irritant                                    | Irritant                             | Irritant                                                    |
| Distance           | 0.592                                       | 0.635                                | 0.662                                                       |
| Reference          | 28ZPAK 239;72                               | 28ZPAK-;124;72                       | 28ZPAK-;92;72                                               |

## Model Applicability

Unknown features are fingerprint features in the query molecule, but not found or appearing too infrequently in the training set.

1. All properties and OPS components are within expected ranges.
2. Unknown FCFP\_2 feature: -1151884458: [\*]N[c](:n[\*]):[c](:[\*]):[\*]
3. Unknown FCFP\_2 feature: -885461129: [\*]NNC(=[\*])[\*]

## Feature Contribution

| Top features for positive contribution |            |                                               |       |                          |
|----------------------------------------|------------|-----------------------------------------------|-------|--------------------------|
| Fingerprint                            | Bit/Smiles | Feature Structure                             | Score | Irritant in training set |
| FCFP_12                                | 1747237384 | <br><chem>[*][c](:[*]):n:[c](:[*]):[*]</chem> | 0.208 | 44 out of 44             |

|                                        |            |                                                                                                                                                       |        |                          |
|----------------------------------------|------------|-------------------------------------------------------------------------------------------------------------------------------------------------------|--------|--------------------------|
| FCFP_12                                | 178336375  | 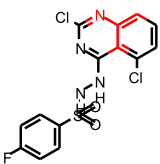<br><chem>[*]:[cH]:[c](:n:[*]):[c](:[*]):[*]</chem>                | 0.202  | 19 out of 19             |
| FCFP_12                                | 713358128  | <br><chem>[*]:n:[c]1:[cH]:[cH]:[cH]:[*]:[c]:1:[*]</chem>           | 0.2    | 17 out of 17             |
| Top Features for negative contribution |            |                                                                                                                                                       |        |                          |
| Fingerprint                            | Bit/Smiles | Feature Structure                                                                                                                                     | Score  | Irritant in training set |
| FCFP_12                                | 1237732457 | <br><chem>[*][c](:[*]):[c]1:[c](Cl):[cH]:[cH]:[*]:[c]:1:[*]</chem> | -0.132 | 2 out of 3               |
| FCFP_12                                | 991735244  | <br><chem>[*]:[c]1:[*]:[cH]:[cH]:[cH]:[cH]:1</chem>               | 0      | 237 out of 291           |
| FCFP_12                                | 1872154524 | <br><chem>[*]C(=O)[*]</chem>                                     | 0      | 563 out of 690           |

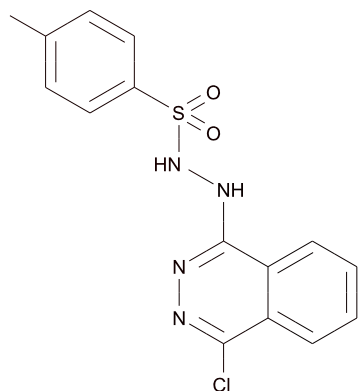

$C_{15}H_{13}ClN_4O_2S$

Molecular Weight: 348.80731

ALogP: 3.529

Rotatable Bonds: 4

Acceptors: 5

Donors: 2

## Model Prediction

Prediction: Irritant

Probability: 1

Enrichment: 1.18

Bayesian Score: 1.69

Mahalanobis Distance: 3.74

Mahalanobis Distance p-value: 1

Prediction: Positive if the Bayesian score is above the estimated best cutoff value from minimizing the false positive and false negative rate.

Probability: The estimated probability that the sample is in the positive category. This assumes that the Bayesian score follows a normal distribution and is different from the prediction using a cutoff.

Enrichment: An estimate of enrichment, that is, the increased likelihood (versus random) of this sample being in the category.

Bayesian Score: The standard Laplacian-modified Bayesian score.

Mahalanobis Distance: The Mahalanobis distance (MD) is the distance to the center of the training data. The larger the MD, the less trustworthy the prediction.

Mahalanobis Distance p-value: The p-value gives the fraction of training data with an MD greater than or equal to the one for the given sample, assuming normally distributed data. The smaller the p-value, the less trustworthy the prediction. For highly non-normal X properties (e.g., fingerprints), the MD p-value is wildly inaccurate.

## Structural Similar Compounds

| Name               | ANTHRAQUINONE; 1-AMINO-4-HYDROXY-2-PHENOXY- | 1-AMINO-4-BENZOYLAMINO-ANTHRAQUINONE | 2,2';-Dihydroxy-4,4'-dimethoxybenzophenone |
|--------------------|---------------------------------------------|--------------------------------------|--------------------------------------------|
| Structure          |                                             |                                      |                                            |
| Actual Endpoint    | Irritant                                    | Irritant                             | Non-Irritant                               |
| Predicted Endpoint | Irritant                                    | Irritant                             | Non-Irritant                               |
| Distance           | 0.524                                       | 0.584                                | 0.609                                      |
| Reference          | 28ZPAK 239;72                               | 28ZPAK-;124;72                       | J. Am. Coll. Toxicol. 2(5):35;1983         |

## Model Applicability

Unknown features are fingerprint features in the query molecule, but not found or appearing too infrequently in the training set.

1. All properties and OPS components are within expected ranges.
2. Unknown FCFP\_2 feature: -1151884458: [\*]N[c](:n[\*]):[c](:[\*]):[\*]
3. Unknown FCFP\_2 feature: -885461129: [\*]NNC(=[\*])[\*]

## Feature Contribution

| Top features for positive contribution |            |                   |       |                          |
|----------------------------------------|------------|-------------------|-------|--------------------------|
| Fingerprint                            | Bit/Smiles | Feature Structure | Score | Irritant in training set |
| FCFP_12                                | 17         | <br>[*]:n:[*]     | 0.189 | 48 out of 49             |

|                                        |            |                                                                                                                                                    |       |                          |
|----------------------------------------|------------|----------------------------------------------------------------------------------------------------------------------------------------------------|-------|--------------------------|
| FCFP_12                                | 71476542   | 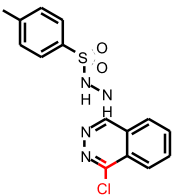<br>[*]:[c](:[*])Cl                                              | 0.175 | 81 out of 84             |
| FCFP_12                                | 4427049    | <br>[*][c](:[*]):n:n:[*]                                        | 0.167 | 4 out of 4               |
| Top Features for negative contribution |            |                                                                                                                                                    |       |                          |
| Fingerprint                            | Bit/Smiles | Feature Structure                                                                                                                                  | Score | Irritant in training set |
| FCFP_12                                | 632767364  | <br>[*]S(=[*])(=[*])[c]1:<br>[cH]:[cH]:[c](C):[cH<br>]:[cH]:1   | 0     | 4 out of 5               |
| FCFP_12                                | -453677277 | <br>[*][c]1:[*]:[cH]:[c](<br>:[cH]:[cH]:1)S(=[*])<br>(=[*])[*] | 0     | 264 out of 323           |
| FCFP_12                                | 991735244  | <br>[*]:[c]1:[*]:[cH]:[cH<br>]:[cH]:[cH]:1                    | 0     | 237 out of 291           |

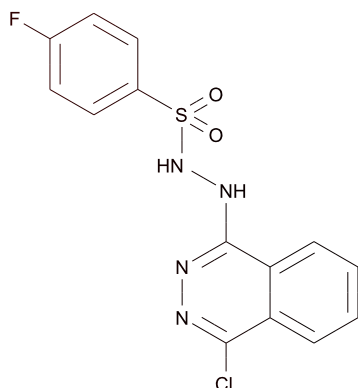

$C_{14}H_{10}ClFN_4O_2S$

Molecular Weight: 352.7712

ALogP: 3.248

Rotatable Bonds: 4

Acceptors: 5

Donors: 2

## Model Prediction

Prediction: Irritant

Probability: 1

Enrichment: 1.18

Bayesian Score: 2.11

Mahalanobis Distance: 3.69

Mahalanobis Distance p-value: 1

Prediction: Positive if the Bayesian score is above the estimated best cutoff value from minimizing the false positive and false negative rate.

Probability: The estimated probability that the sample is in the positive category. This assumes that the Bayesian score follows a normal distribution and is different from the prediction using a cutoff.

Enrichment: An estimate of enrichment, that is, the increased likelihood (versus random) of this sample being in the category.

Bayesian Score: The standard Laplacian-modified Bayesian score.

Mahalanobis Distance: The Mahalanobis distance (MD) is the distance to the center of the training data. The larger the MD, the less trustworthy the prediction.

Mahalanobis Distance p-value: The p-value gives the fraction of training data with an MD greater than or equal to the one for the given sample, assuming normally distributed data. The smaller the p-value, the less trustworthy the prediction. For highly non-normal X properties (e.g., fingerprints), the MD p-value is wildly inaccurate.

## Structural Similar Compounds

| Name               | ANTHRAQUINONE; 1-AMINO-4-HYDROXY-2-PHENOXY- | 1-AMINO-4-BENZOYLAMINO-ANTHRAQUINONE | Anthraquinone; 1-amino-2-bromo-4-hydroxy-                              |
|--------------------|---------------------------------------------|--------------------------------------|------------------------------------------------------------------------|
| Structure          |                                             |                                      |                                                                        |
| Actual Endpoint    | Irritant                                    | Irritant                             | Non-Irritant                                                           |
| Predicted Endpoint | Irritant                                    | Irritant                             | Non-Irritant                                                           |
| Distance           | 0.530                                       | 0.579                                | 0.602                                                                  |
| Reference          | 28ZPAK 239;72                               | 28ZPAK-;124;72                       | Prehled Prumyslove Toxikologie; Organické Latky; Marhold; J. pp 535;86 |

## Model Applicability

Unknown features are fingerprint features in the query molecule, but not found or appearing too infrequently in the training set.

1. All properties and OPS components are within expected ranges.
2. Unknown FCFP\_2 feature: -1151884458: [\*]N[c](:n:[\*]):[c](:[\*]):[\*]
3. Unknown FCFP\_2 feature: -885461129: [\*]NNC(=[\*])[\*]

## Feature Contribution

| Top features for positive contribution |             |                                                  |       |                          |
|----------------------------------------|-------------|--------------------------------------------------|-------|--------------------------|
| Fingerprint                            | Bit/Smiles  | Feature Structure                                | Score | Irritant in training set |
| FCFP_12                                | -1508180856 | <br>[*][c]1:[cH]:[cH]:[c]:[c]<br>(F):[cH]:[cH]:1 | 0.2   | 17 out of 17             |

|                                        |            |                                                                                                                                                   |       |                          |
|----------------------------------------|------------|---------------------------------------------------------------------------------------------------------------------------------------------------|-------|--------------------------|
| FCFP_12                                | 17         | 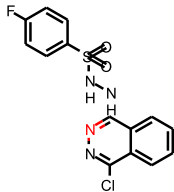<br>[*]:n:[*]                                                  | 0.189 | 48 out of 49             |
| FCFP_12                                | -149636017 | <br>[*]S(=[*])(=[*])[c]1:<br>[cH]:[cH]:[c](F):[cH]<br>]:[cH]:1 | 0.184 | 7 out of 7               |
| Top Features for negative contribution |            |                                                                                                                                                   |       |                          |
| Fingerprint                            | Bit/Smiles | Feature Structure                                                                                                                                 | Score | Irritant in training set |
| FCFP_12                                | -453677277 | <br>[*][c]1:[*]:[cH]:[c](<br>:[cH]:[cH]:1)S(=[*])<br>(=[*])[*] | 0     | 264 out of 323           |
| FCFP_12                                | 991735244  | <br>[*]:[c]1:[*]:[cH]:[cH]<br>]:[cH]:[cH]:1                   | 0     | 237 out of 291           |
| FCFP_12                                | 203677720  | <br>[*]S(=[*])(=[*])[c](:<br>[cH]:[*]):[cH]:[*]              | 0     | 319 out of 382           |

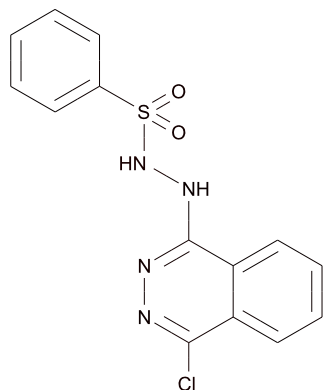

$C_{14}H_{11}ClN_4O_2S$

Molecular Weight: 334.78073

ALogP: 3.043

Rotatable Bonds: 4

Acceptors: 5

Donors: 2

## Model Prediction

Prediction: Irritant

Probability: 1

Enrichment: 1.18

Bayesian Score: 1.17

Mahalanobis Distance: 3.64

Mahalanobis Distance p-value: 1

Prediction: Positive if the Bayesian score is above the estimated best cutoff value from minimizing the false positive and false negative rate.

Probability: The estimated probability that the sample is in the positive category. This assumes that the Bayesian score follows a normal distribution and is different from the prediction using a cutoff.

Enrichment: An estimate of enrichment, that is, the increased likelihood (versus random) of this sample being in the category.

Bayesian Score: The standard Laplacian-modified Bayesian score.

Mahalanobis Distance: The Mahalanobis distance (MD) is the distance to the center of the training data. The larger the MD, the less trustworthy the prediction.

Mahalanobis Distance p-value: The p-value gives the fraction of training data with an MD greater than or equal to the one for the given sample, assuming normally distributed data. The smaller the p-value, the less trustworthy the prediction. For highly non-normal X properties (e.g., fingerprints), the MD p-value is wildly inaccurate.

## Structural Similar Compounds

| Name               | ANTHRAQUINONE; 1-AMINO-4-HYDROXY-2-PHENOXY- | 1-AMINO-4-BENZOYLAMINO-ANTHRAQUINONE | Anthraquinone; 1-amino-2-bromo-4-hydroxy-                              |
|--------------------|---------------------------------------------|--------------------------------------|------------------------------------------------------------------------|
| Structure          |                                             |                                      |                                                                        |
| Actual Endpoint    | Irritant                                    | Irritant                             | Non-Irritant                                                           |
| Predicted Endpoint | Irritant                                    | Irritant                             | Non-Irritant                                                           |
| Distance           | 0.521                                       | 0.567                                | 0.582                                                                  |
| Reference          | 28ZPAK 239;72                               | 28ZPAK-;124;72                       | Prehled Prumyslove Toxikologie; Organické Latky; Marhold; J. pp 535;86 |

## Model Applicability

Unknown features are fingerprint features in the query molecule, but not found or appearing too infrequently in the training set.

1. All properties and OPS components are within expected ranges.
2. Unknown FCFP\_2 feature: -1151884458: [\*]N[c](:n:[\*]):[c](:[\*]):[\*]
3. Unknown FCFP\_2 feature: -885461129: [\*]NNC(=[\*])[\*]

## Feature Contribution

| Top features for positive contribution |            |                   |       |                          |
|----------------------------------------|------------|-------------------|-------|--------------------------|
| Fingerprint                            | Bit/Smiles | Feature Structure | Score | Irritant in training set |
| FCFP_12                                | 17         | <br>[*]:n:[*]     | 0.189 | 48 out of 49             |

|                                        |             |                                                                                                                                                    |         |                          |
|----------------------------------------|-------------|----------------------------------------------------------------------------------------------------------------------------------------------------|---------|--------------------------|
| FCFP_12                                | 71476542    | 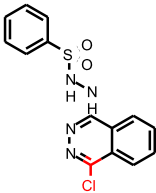<br>[*]:[c](:[*])Cl                                             | 0.175   | 81 out of 84             |
| FCFP_12                                | 4427049     | <br>[*][c](:[*]):n:n:[*]                                        | 0.167   | 4 out of 4               |
| Top Features for negative contribution |             |                                                                                                                                                    |         |                          |
| Fingerprint                            | Bit/Smiles  | Feature Structure                                                                                                                                  | Score   | Irritant in training set |
| FCFP_12                                | -1698724694 | <br>[*]S(=[*])(=[*])[c]1:<br>[cH]:[cH]:[cH]:[cH]:<br>[cH]:1     | -0.0964 | 107 out of 146           |
| FCFP_12                                | -453677277  | <br>[*][c]1:[*]:[cH]:[c](<br>:[cH]:[cH]:1)S(=[*])<br>(=[*])[*] | 0       | 264 out of 323           |
| FCFP_12                                | 991735244   | <br>[*]:[c]1:[*]:[cH]:[cH]<br>]:[cH]:[cH]:1                   | 0       | 237 out of 291           |

# Thalidomide

# TOPKAT\_Ocular\_Irritancy\_None\_vs\_Irritant

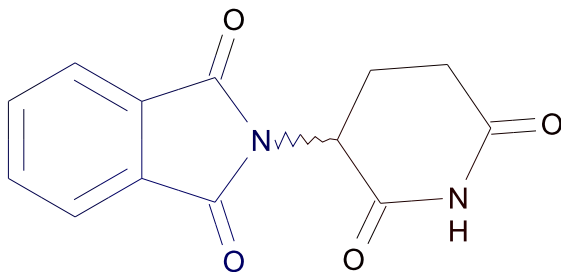

C<sub>13</sub>H<sub>10</sub>N<sub>2</sub>O<sub>4</sub>

Molecular Weight: 258.22949

ALogP: 9.7e-002

Rotatable Bonds: 1

Acceptors: 4

Donors: 1

## Model Prediction

Prediction: Non-Irritant

Probability: 0.971

Enrichment: 1.14

Bayesian Score: -1.01

Mahalanobis Distance: 6.67

Mahalanobis Distance p-value: 1

Prediction: Positive if the Bayesian score is above the estimated best cutoff value from minimizing the false positive and false negative rate.

Probability: The estimated probability that the sample is in the positive category. This assumes that the Bayesian score follows a normal distribution and is different from the prediction using a cutoff.

Enrichment: An estimate of enrichment, that is, the increased likelihood (versus random) of this sample being in the category.

Bayesian Score: The standard Laplacian-modified Bayesian score.

Mahalanobis Distance: The Mahalanobis distance (MD) is the distance to the center of the training data. The larger the MD, the less trustworthy the prediction.

Mahalanobis Distance p-value: The p-value gives the fraction of training data with an MD greater than or equal to the one for the given sample, assuming normally distributed data. The smaller the p-value, the less trustworthy the prediction. For highly non-normal X properties (e.g., fingerprints), the MD p-value is wildly inaccurate.

## Structural Similar Compounds

| Name               | ETHANOL;2-(PHENYLSULFONYL)- | P-ACETOPHENETIDIDE;3-NITRO- | 3(2H)-Pyridazinone; 5-amino-4-chloro-2-phenyl-                         |
|--------------------|-----------------------------|-----------------------------|------------------------------------------------------------------------|
| Structure          |                             |                             |                                                                        |
| Actual Endpoint    | Irritant                    | Irritant                    | Irritant                                                               |
| Predicted Endpoint | Irritant                    | Irritant                    | Irritant                                                               |
| Distance           | 0.570                       | 0.582                       | 0.611                                                                  |
| Reference          | 28ZPAK-;200;72              | 28ZPAK-;115;72              | Prehled Prumyslove Toxikologie; Organicke Latky; Marhold; J. pp 868;86 |

## Model Applicability

Unknown features are fingerprint features in the query molecule, but not found or appearing too infrequently in the training set.

1. All properties and OPS components are within expected ranges.

## Feature Contribution

| Top features for positive contribution |            |                           |       |                          |
|----------------------------------------|------------|---------------------------|-------|--------------------------|
| Fingerprint                            | Bit/Smiles | Feature Structure         | Score | Irritant in training set |
| FCFP_12                                | -885550502 | <br>[*]C(=[*])NC(=[*])[*] | 0.18  | 64 out of 66             |

|                                        |             |                                                                                                                                                              |        |                          |
|----------------------------------------|-------------|--------------------------------------------------------------------------------------------------------------------------------------------------------------|--------|--------------------------|
| FCFP_12                                | 566058135   | 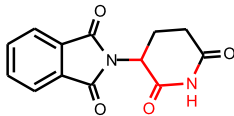<br><chem>[*]CC(=O)N[*]</chem>                                            | 0.163  | 23 out of 24             |
| FCFP_12                                | -1553874037 | <br><chem>[*]C([*])N1C(=[*])[*]<br/>:[*]C1=[*]</chem>                     | 0.163  | 42 out of 44             |
| Top Features for negative contribution |             |                                                                                                                                                              |        |                          |
| Fingerprint                            | Bit/Smiles  | Feature Structure                                                                                                                                            | Score  | Irritant in training set |
| FCFP_12                                | 1393189956  | <br><chem>[*]N1C(=[*])[c]2:[cH]<br/>:[cH]:[cH]:[cH]:[c]:<br/>2C1=O</chem> | -0.782 | 5 out of 15              |
| FCFP_12                                | 2139882011  | <br><chem>[*]N1C(=[*])[c]2:[cH]<br/>:[*]:[cH]:[cH]:[c]:2<br/>C1=O</chem> | -0.782 | 5 out of 15              |
| FCFP_12                                | -1549163031 | <br><chem>[*]N1[*][*]:[c](:[*])<br/>C1=O</chem>                         | -0.623 | 16 out of 38             |

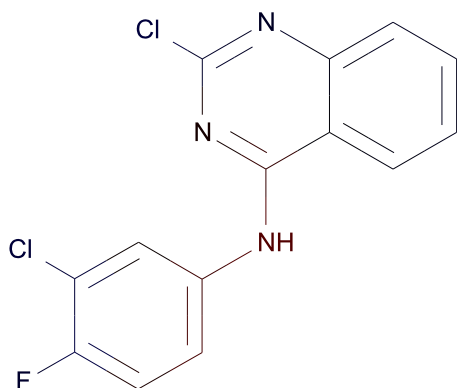

$C_{14}H_8Cl_2FN_3$

Molecular Weight: 308.13782

ALogP: 5.202

Rotatable Bonds: 2

Acceptors: 3

Donors: 1

## Model Prediction

Prediction: Non-Carcinogen

Probability: 0.251

Enrichment: 0.78

Bayesian Score: -2.7

Mahalanobis Distance: 9.27

Mahalanobis Distance p-value: 0.714

Prediction: Positive if the Bayesian score is above the estimated best cutoff value from minimizing the false positive and false negative rate.

Probability: The estimated probability that the sample is in the positive category. This assumes that the Bayesian score follows a normal distribution and is different from the prediction using a cutoff.

Enrichment: An estimate of enrichment, that is, the increased likelihood (versus random) of this sample being in the category.

Bayesian Score: The standard Laplacian-modified Bayesian score.

Mahalanobis Distance: The Mahalanobis distance (MD) is the distance to the center of the training data. The larger the MD, the less trustworthy the prediction.

Mahalanobis Distance p-value: The p-value gives the fraction of training data with an MD greater than or equal to the one for the given sample, assuming normally distributed data. The smaller the p-value, the less trustworthy the prediction. For highly non-normal X properties (e.g., fingerprints), the MD p-value is wildly inaccurate.

## Structural Similar Compounds

| Name               | Nafenopin                                                           | Mestranol                                                           | Levonorgestrel                                                      |
|--------------------|---------------------------------------------------------------------|---------------------------------------------------------------------|---------------------------------------------------------------------|
| Structure          |                                                                     |                                                                     |                                                                     |
| Actual Endpoint    | Non-Carcinogen                                                      | Carcinogen                                                          | Non-Carcinogen                                                      |
| Predicted Endpoint | Non-Carcinogen                                                      | Carcinogen                                                          | Carcinogen                                                          |
| Distance           | 0.607                                                               | 0.610                                                               | 0.611                                                               |
| Reference          | US FDA (Centre for Drug Eval.& Res./Off. Testing & Res.) Sept. 1997 | US FDA (Centre for Drug Eval.& Res./Off. Testing & Res.) Sept. 1997 | US FDA (Centre for Drug Eval.& Res./Off. Testing & Res.) Sept. 1997 |

## Model Applicability

Unknown features are fingerprint features in the query molecule, but not found or appearing too infrequently in the training set.

1. All properties and OPS components are within expected ranges.
2. Unknown ECFP\_2 feature: 1126732433: [\*]:n:[c](Cl):n:[\*]

## Feature Contribution

### Top features for positive contribution

| Fingerprint | Bit/Smiles | Feature Structure                            | Score | Carcinogen in training set |
|-------------|------------|----------------------------------------------|-------|----------------------------|
| ECFP_12     | -177077903 | <br><chem>[*]N[c](:[cH]:[*]):[c]H:[*]</chem> | 0.529 | 6 out of 10                |

| ECFP_12                                | 888054369  | 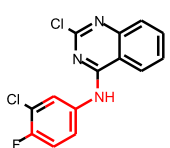<br><chem>[*]N[c]1:[cH]:[*]:[c]([*]):[cH]:1</chem> | 0.454  | 5 out of 9                 |
|----------------------------------------|------------|---------------------------------------------------------------------------------------------------------------------------------------|--------|----------------------------|
| ECFP_12                                | 1049768340 | <br><chem>[*]N[c](:n:[*]):[c](:[*]):[*]</chem>     | 0.421  | 1 out of 1                 |
| Top Features for negative contribution |            |                                                                                                                                       |        |                            |
| Fingerprint                            | Bit/Smiles | Feature Structure                                                                                                                     | Score  | Carcinogen in training set |
| ECFP_12                                | 1335691903 | <br><chem>[*][c](:[*]):[c](Cl):[cH]:[*]</chem>     | -1.11  | 2 out of 26                |
| ECFP_12                                | 99947387   | <br><chem>[*]:[c](:[*])Cl</chem>                  | -0.817 | 8 out of 62                |
| ECFP_12                                | -817402818 | <br><chem>[*]Cl</chem>                           | -0.368 | 17 out of 80               |

7a

## TOPKAT\_Rat\_Female\_FDA\_None\_vs\_Carcinogen

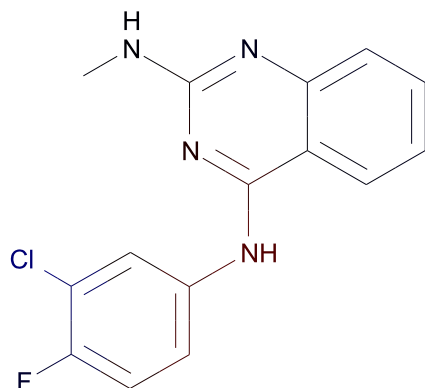C<sub>15</sub>H<sub>12</sub>ClFN<sub>4</sub>

Molecular Weight: 302.73398

ALogP: 4.677

Rotatable Bonds: 3

Acceptors: 4

Donors: 2

**Model Prediction**

Prediction: Non-Carcinogen

Probability: 0.258

Enrichment: 0.802

Bayesian Score: -2.25

Mahalanobis Distance: 9.5

Mahalanobis Distance p-value: 0.607

Prediction: Positive if the Bayesian score is above the estimated best cutoff value from minimizing the false positive and false negative rate.

Probability: The estimated probability that the sample is in the positive category. This assumes that the Bayesian score follows a normal distribution and is different from the prediction using a cutoff.

Enrichment: An estimate of enrichment, that is, the increased likelihood (versus random) of this sample being in the category.

Bayesian Score: The standard Laplacian-modified Bayesian score.

Mahalanobis Distance: The Mahalanobis distance (MD) is the distance to the center of the training data. The larger the MD, the less trustworthy the prediction.

Mahalanobis Distance p-value: The p-value gives the fraction of training data with an MD greater than or equal to the one for the given sample, assuming normally distributed data. The smaller the p-value, the less trustworthy the prediction. For highly non-normal X properties (e.g., fingerprints), the MD p-value is wildly inaccurate.

**Structural Similar Compounds**

| Name               | Meclofenamate                                                       | Diclofenac                                                          | Phenolphthalein                                                     |
|--------------------|---------------------------------------------------------------------|---------------------------------------------------------------------|---------------------------------------------------------------------|
| Structure          |                                                                     |                                                                     |                                                                     |
| Actual Endpoint    | Non-Carcinogen                                                      | Non-Carcinogen                                                      | Carcinogen                                                          |
| Predicted Endpoint | Non-Carcinogen                                                      | Non-Carcinogen                                                      | Carcinogen                                                          |
| Distance           | 0.540                                                               | 0.566                                                               | 0.594                                                               |
| Reference          | US FDA (Centre for Drug Eval.& Res./Off. Testing & Res.) Sept. 1997 | US FDA (Centre for Drug Eval.& Res./Off. Testing & Res.) Sept. 1997 | US FDA (Centre for Drug Eval.& Res./Off. Testing & Res.) Sept. 1997 |

**Model Applicability**

Unknown features are fingerprint features in the query molecule, but not found or appearing too infrequently in the training set.

1. All properties and OPS components are within expected ranges.
2. Unknown ECFP\_2 feature: -1240852525: [\*]:[c](:[\*])NC

**Feature Contribution****Top features for positive contribution**

| Fingerprint | Bit/Smiles | Feature Structure               | Score | Carcinogen in training set |
|-------------|------------|---------------------------------|-------|----------------------------|
| ECFP_12     | -177077903 | <br>[*]N[c](:[cH]:[*]):[cH]:[*] | 0.529 | 6 out of 10                |

| ECFP_12                                | 888054369  | 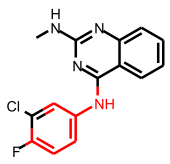<br><chem>[*]N(c1:[cH]:[*]:[c]([*]):[cH]:[cH]:1</chem> | 0.454  | 5 out of 9                 |
|----------------------------------------|------------|-------------------------------------------------------------------------------------------------------------------------------------------|--------|----------------------------|
| ECFP_12                                | 1049768340 | <br><chem>[*]N(c):n:[*]:[c]([*]):[c]:[c]:1</chem>      | 0.421  | 1 out of 1                 |
| Top Features for negative contribution |            |                                                                                                                                           |        |                            |
| Fingerprint                            | Bit/Smiles | Feature Structure                                                                                                                         | Score  | Carcinogen in training set |
| ECFP_12                                | 1335691903 | <br><chem>[*][c]([*]):[c](Cl):[cH]:[*]</chem>          | -1.11  | 2 out of 26                |
| ECFP_12                                | 99947387   | <br><chem>[*]:[c]([*])Cl</chem>                       | -0.817 | 8 out of 62                |
| ECFP_12                                | -817402818 | <br><chem>[*]Cl</chem>                               | -0.368 | 17 out of 80               |

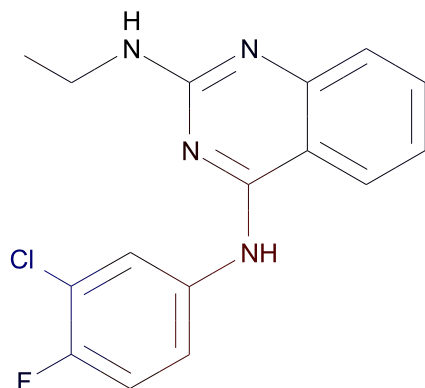

$C_{16}H_{14}ClFN_4$

Molecular Weight: 316.76056

ALogP: 5.025

Rotatable Bonds: 4

Acceptors: 4

Donors: 2

## Model Prediction

Prediction: Non-Carcinogen

Probability: 0.251

Enrichment: 0.779

Bayesian Score: -2.72

Mahalanobis Distance: 10.1

Mahalanobis Distance p-value: 0.341

Prediction: Positive if the Bayesian score is above the estimated best cutoff value from minimizing the false positive and false negative rate.

Probability: The estimated probability that the sample is in the positive category. This assumes that the Bayesian score follows a normal distribution and is different from the prediction using a cutoff.

Enrichment: An estimate of enrichment, that is, the increased likelihood (versus random) of this sample being in the category.

Bayesian Score: The standard Laplacian-modified Bayesian score.

Mahalanobis Distance: The Mahalanobis distance (MD) is the distance to the center of the training data. The larger the MD, the less trustworthy the prediction.

Mahalanobis Distance p-value: The p-value gives the fraction of training data with an MD greater than or equal to the one for the given sample, assuming normally distributed data. The smaller the p-value, the less trustworthy the prediction. For highly non-normal X properties (e.g., fingerprints), the MD p-value is wildly inaccurate.

## Structural Similar Compounds

| Name               | Diclofenac                                                          | Meclofenamate                                                       | Mefloquine                                                          |
|--------------------|---------------------------------------------------------------------|---------------------------------------------------------------------|---------------------------------------------------------------------|
| Structure          |                                                                     |                                                                     |                                                                     |
| Actual Endpoint    | Non-Carcinogen                                                      | Non-Carcinogen                                                      | Non-Carcinogen                                                      |
| Predicted Endpoint | Non-Carcinogen                                                      | Non-Carcinogen                                                      | Non-Carcinogen                                                      |
| Distance           | 0.568                                                               | 0.569                                                               | 0.625                                                               |
| Reference          | US FDA (Centre for Drug Eval.& Res./Off. Testing & Res.) Sept. 1997 | US FDA (Centre for Drug Eval.& Res./Off. Testing & Res.) Sept. 1997 | US FDA (Centre for Drug Eval.& Res./Off. Testing & Res.) Sept. 1997 |

## Model Applicability

Unknown features are fingerprint features in the query molecule, but not found or appearing too infrequently in the training set.

1. All properties and OPS components are within expected ranges.

## Feature Contribution

### Top features for positive contribution

| Fingerprint | Bit/Smiles | Feature Structure               | Score | Carcinogen in training set |
|-------------|------------|---------------------------------|-------|----------------------------|
| ECFP_12     | -177077903 | <br>[*]N[c](:[cH]:[*]):[cH]:[*] | 0.529 | 6 out of 10                |

|                                        |            |                                                                                                                                                      |        |                            |
|----------------------------------------|------------|------------------------------------------------------------------------------------------------------------------------------------------------------|--------|----------------------------|
| ECFP_12                                | 888054369  | 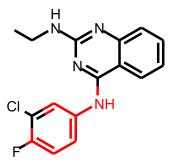<br><chem>[*]N[c]1:[cH]:[*]:[c]([*]):[cH]:[cH]:1</chem>           | 0.454  | 5 out of 9                 |
| ECFP_12                                | 1434334340 | <br><chem>[*][c]1:[*]:[cH]:[cH]:[c](N[c](:[*]):[*]):[cH]:1</chem> | 0.421  | 1 out of 1                 |
| Top Features for negative contribution |            |                                                                                                                                                      |        |                            |
| Fingerprint                            | Bit/Smiles | Feature Structure                                                                                                                                    | Score  | Carcinogen in training set |
| ECFP_12                                | 1335691903 | <br><chem>[*][c](:[*]):[c](Cl):[cH]:[*]</chem>                    | -1.11  | 2 out of 26                |
| ECFP_12                                | 99947387   | <br><chem>[*]:[c](:[*])Cl</chem>                                 | -0.817 | 8 out of 62                |
| ECFP_12                                | 491100606  | <br><chem>[*]CN[c](:[*]):[*]</chem>                             | -0.485 | 0 out of 2                 |

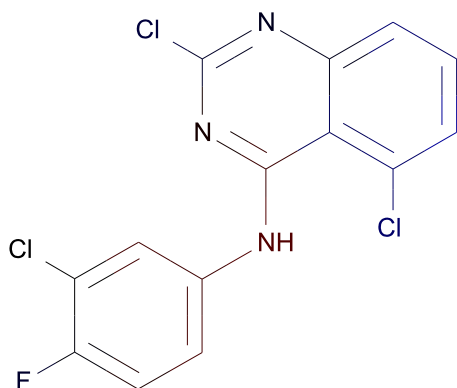

$C_{14}H_7Cl_3FN_3$

Molecular Weight: 342.58288

ALogP: 5.867

Rotatable Bonds: 2

Acceptors: 3

Donors: 1

## Model Prediction

Prediction: Non-Carcinogen

Probability: 0.228

Enrichment: 0.708

Bayesian Score: -4.41

Mahalanobis Distance: 8.07

Mahalanobis Distance p-value: 0.984

Prediction: Positive if the Bayesian score is above the estimated best cutoff value from minimizing the false positive and false negative rate.

Probability: The estimated probability that the sample is in the positive category. This assumes that the Bayesian score follows a normal distribution and is different from the prediction using a cutoff.

Enrichment: An estimate of enrichment, that is, the increased likelihood (versus random) of this sample being in the category.

Bayesian Score: The standard Laplacian-modified Bayesian score.

Mahalanobis Distance: The Mahalanobis distance (MD) is the distance to the center of the training data. The larger the MD, the less trustworthy the prediction.

Mahalanobis Distance p-value: The p-value gives the fraction of training data with an MD greater than or equal to the one for the given sample, assuming normally distributed data. The smaller the p-value, the less trustworthy the prediction. For highly non-normal X properties (e.g., fingerprints), the MD p-value is wildly inaccurate.

## Structural Similar Compounds

| Name               | Mestranol                                                           | Nafenopin                                                           | Levonorgestrel                                                      |
|--------------------|---------------------------------------------------------------------|---------------------------------------------------------------------|---------------------------------------------------------------------|
| Structure          |                                                                     |                                                                     |                                                                     |
| Actual Endpoint    | Carcinogen                                                          | Non-Carcinogen                                                      | Non-Carcinogen                                                      |
| Predicted Endpoint | Carcinogen                                                          | Non-Carcinogen                                                      | Carcinogen                                                          |
| Distance           | 0.639                                                               | 0.649                                                               | 0.652                                                               |
| Reference          | US FDA (Centre for Drug Eval.& Res./Off. Testing & Res.) Sept. 1997 | US FDA (Centre for Drug Eval.& Res./Off. Testing & Res.) Sept. 1997 | US FDA (Centre for Drug Eval.& Res./Off. Testing & Res.) Sept. 1997 |

## Model Applicability

Unknown features are fingerprint features in the query molecule, but not found or appearing too infrequently in the training set.

1. All properties and OPS components are within expected ranges.
2. Unknown ECFP\_2 feature: 1126732433: [\*]:n:[c](Cl):n:[\*]

## Feature Contribution

### Top features for positive contribution

| Fingerprint | Bit/Smiles | Feature Structure               | Score | Carcinogen in training set |
|-------------|------------|---------------------------------|-------|----------------------------|
| ECFP_12     | -177077903 | <br>[*]N[c](:[cH]:[*]):[c]H:[*] | 0.529 | 6 out of 10                |

|                                        |             |                                                                                                                                                   |        |                            |
|----------------------------------------|-------------|---------------------------------------------------------------------------------------------------------------------------------------------------|--------|----------------------------|
| ECFP_12                                | 888054369   | 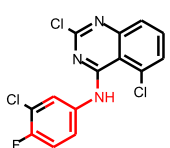<br><chem>[*]N[c]1:[cH]:[*]:[c]([*]):[cH]:1</chem>             | 0.454  | 5 out of 9                 |
| ECFP_12                                | -1661653144 | <br><chem>[*][c](:[*]):[c](:[c]([*]):[*]):[c](:[*]):[*]</chem> | 0.437  | 2 out of 3                 |
| Top Features for negative contribution |             |                                                                                                                                                   |        |                            |
| Fingerprint                            | Bit/Smiles  | Feature Structure                                                                                                                                 | Score  | Carcinogen in training set |
| ECFP_12                                | 1335691903  | <br><chem>[*][c](:[*]):[c](Cl):[cH]:[*]</chem>                 | -1.11  | 2 out of 26                |
| ECFP_12                                | 1641317964  | <br><chem>[*]:[c]1:[*]:[cH]:[cH]:[cH]:[c]:1Cl</chem>          | -0.929 | 1 out of 13                |
| ECFP_12                                | 99947387    | <br><chem>[*]:[c](:[*])Cl</chem>                             | -0.817 | 8 out of 62                |

11b

## TOPKAT\_Rat\_Female\_FDA\_None\_vs\_Carcinogen

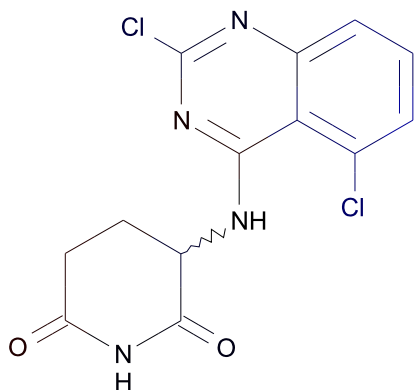C<sub>13</sub>H<sub>10</sub>Cl<sub>2</sub>N<sub>4</sub>O<sub>2</sub>

Molecular Weight: 325.15009

ALogP: 2.49

Rotatable Bonds: 2

Acceptors: 5

Donors: 2

**Model Prediction**

Prediction: Non-Carcinogen

Probability: 0.227

Enrichment: 0.705

Bayesian Score: -4.5

Mahalanobis Distance: 10.8

Mahalanobis Distance p-value: 0.0952

Prediction: Positive if the Bayesian score is above the estimated best cutoff value from minimizing the false positive and false negative rate.

Probability: The estimated probability that the sample is in the positive category. This assumes that the Bayesian score follows a normal distribution and is different from the prediction using a cutoff.

Enrichment: An estimate of enrichment, that is, the increased likelihood (versus random) of this sample being in the category.

Bayesian Score: The standard Laplacian-modified Bayesian score.

Mahalanobis Distance: The Mahalanobis distance (MD) is the distance to the center of the training data. The larger the MD, the less trustworthy the prediction.

Mahalanobis Distance p-value: The p-value gives the fraction of training data with an MD greater than or equal to the one for the given sample, assuming normally distributed data. The smaller the p-value, the less trustworthy the prediction. For highly non-normal X properties (e.g., fingerprints), the MD p-value is wildly inaccurate.

**Structural Similar Compounds**

| Name               | Metolazone                                                          | Naltrexone                                                          | Indapamide                                                          |
|--------------------|---------------------------------------------------------------------|---------------------------------------------------------------------|---------------------------------------------------------------------|
| Structure          |                                                                     |                                                                     |                                                                     |
| Actual Endpoint    | Non-Carcinogen                                                      | Non-Carcinogen                                                      | Non-Carcinogen                                                      |
| Predicted Endpoint | Non-Carcinogen                                                      | Non-Carcinogen                                                      | Non-Carcinogen                                                      |
| Distance           | 0.574                                                               | 0.589                                                               | 0.590                                                               |
| Reference          | US FDA (Centre for Drug Eval.& Res./Off. Testing & Res.) Sept. 1997 | US FDA (Centre for Drug Eval.& Res./Off. Testing & Res.) Sept. 1997 | US FDA (Centre for Drug Eval.& Res./Off. Testing & Res.) Sept. 1997 |

**Model Applicability**

Unknown features are fingerprint features in the query molecule, but not found or appearing too infrequently in the training set.

- OPS PC30 out of range. Value: 3.7537. Training min, max, SD, explained variance: -2.9582, 2.682, 0.9684, 0.0098.
- Unknown ECFP\_2 feature: 1126732433: [\*]:n:[c](Cl):n:[\*]

**Feature Contribution**

| Top features for positive contribution |            |                   |       |                            |
|----------------------------------------|------------|-------------------|-------|----------------------------|
| Fingerprint                            | Bit/Smiles | Feature Structure | Score | Carcinogen in training set |
| ECFP_12                                | -742538367 | <br>[*]CC(=O)N[*] | 0.445 | 3 out of 5                 |

| ECFP_12                                | -1661653144 | 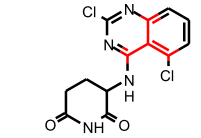<br><chem>[*][c](:[*]):[c](:[c]([*]):[*]):[c](:[*]):[*]</chem> | 0.437  | 2 out of 3                 |
|----------------------------------------|-------------|---------------------------------------------------------------------------------------------------------------------------------------------------|--------|----------------------------|
| ECFP_12                                | 1049768340  | <br><chem>[*]N[c](:n:[*]):[c](:[*]):[*]</chem>                 | 0.421  | 1 out of 1                 |
| Top Features for negative contribution |             |                                                                                                                                                   |        |                            |
| Fingerprint                            | Bit/Smiles  | Feature Structure                                                                                                                                 | Score  | Carcinogen in training set |
| ECFP_12                                | 1335691903  | <br><chem>[*][c](:[*]):[c](Cl):[cH]:[*]</chem>                 | -1.11  | 2 out of 26                |
| ECFP_12                                | 1641317964  | <br><chem>[*]:[c]1:[*]:[cH]:[cH]:[cH]:[c]:1Cl</chem>         | -0.929 | 1 out of 13                |
| ECFP_12                                | 99947387    | <br><chem>[*]:[c](:[*])Cl</chem>                             | -0.817 | 8 out of 62                |

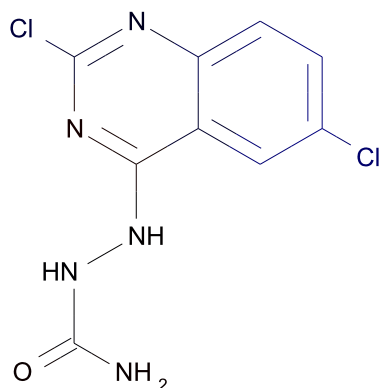

$C_9H_7Cl_2N_5O$

Molecular Weight: 272.09078

ALogP: 2.379

Rotatable Bonds: 2

Acceptors: 4

Donors: 3

## Model Prediction

Prediction: Non-Carcinogen

Probability: 0.227

Enrichment: 0.704

Bayesian Score: -4.51

Mahalanobis Distance: 9.86

Mahalanobis Distance p-value: 0.434

Prediction: Positive if the Bayesian score is above the estimated best cutoff value from minimizing the false positive and false negative rate.

Probability: The estimated probability that the sample is in the positive category. This assumes that the Bayesian score follows a normal distribution and is different from the prediction using a cutoff.

Enrichment: An estimate of enrichment, that is, the increased likelihood (versus random) of this sample being in the category.

Bayesian Score: The standard Laplacian-modified Bayesian score.

Mahalanobis Distance: The Mahalanobis distance (MD) is the distance to the center of the training data. The larger the MD, the less trustworthy the prediction.

Mahalanobis Distance p-value: The p-value gives the fraction of training data with an MD greater than or equal to the one for the given sample, assuming normally distributed data. The smaller the p-value, the less trustworthy the prediction. For highly non-normal X properties (e.g., fingerprints), the MD p-value is wildly inaccurate.

## Structural Similar Compounds

| Name               | Pyrimethamine                                                       | Lamotrigine                                                         | Guanfacine                                                          |
|--------------------|---------------------------------------------------------------------|---------------------------------------------------------------------|---------------------------------------------------------------------|
| Structure          |                                                                     |                                                                     |                                                                     |
| Actual Endpoint    | Non-Carcinogen                                                      | Non-Carcinogen                                                      | Non-Carcinogen                                                      |
| Predicted Endpoint | Non-Carcinogen                                                      | Non-Carcinogen                                                      | Non-Carcinogen                                                      |
| Distance           | 0.627                                                               | 0.635                                                               | 0.639                                                               |
| Reference          | US FDA (Centre for Drug Eval.& Res./Off. Testing & Res.) Sept. 1997 | US FDA (Centre for Drug Eval.& Res./Off. Testing & Res.) Sept. 1997 | US FDA (Centre for Drug Eval.& Res./Off. Testing & Res.) Sept. 1997 |

## Model Applicability

Unknown features are fingerprint features in the query molecule, but not found or appearing too infrequently in the training set.

1. All properties and OPS components are within expected ranges.
2. Unknown ECFP\_2 feature: 1126732433: [\*]:n:[c](Cl):n:[\*]
3. Unknown ECFP\_2 feature: -1238415266: [\*]NN[c](:[\*]):[\*]

## Feature Contribution

### Top features for positive contribution

| Fingerprint | Bit/Smiles | Feature Structure                              | Score | Carcinogen in training set |
|-------------|------------|------------------------------------------------|-------|----------------------------|
| ECFP_12     | 1049768340 | <br><chem>[*]N[c](:n:[*]):[c](:[*]):[*]</chem> | 0.421 | 1 out of 1                 |

|                                        |             |                                                                                                                                            |        |                            |
|----------------------------------------|-------------|--------------------------------------------------------------------------------------------------------------------------------------------|--------|----------------------------|
| ECFP_12                                | 432952415   | 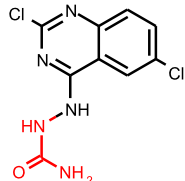<br><chem>[*]NC(=O)N</chem>                             | 0.208  | 1 out of 2                 |
| ECFP_12                                | -1074141656 | <br><chem>[*]=O</chem>                                  | 0.103  | 86 out of 248              |
| Top Features for negative contribution |             |                                                                                                                                            |        |                            |
| Fingerprint                            | Bit/Smiles  | Feature Structure                                                                                                                          | Score  | Carcinogen in training set |
| ECFP_12                                | 99947387    | <br><chem>[*]:[c](:[*])Cl</chem>                        | -0.817 | 8 out of 62                |
| ECFP_12                                | 1854732111  | <br><chem>[*]:[c]1:[*]:[cH]:[c](Cl):[cH]:[cH]:1</chem> | -0.816 | 4 out of 33                |
| ECFP_12                                | -176494269  | <br><chem>[*]:[cH]:[c](Cl):[cH]:[*]</chem>            | -0.714 | 5 out of 36                |

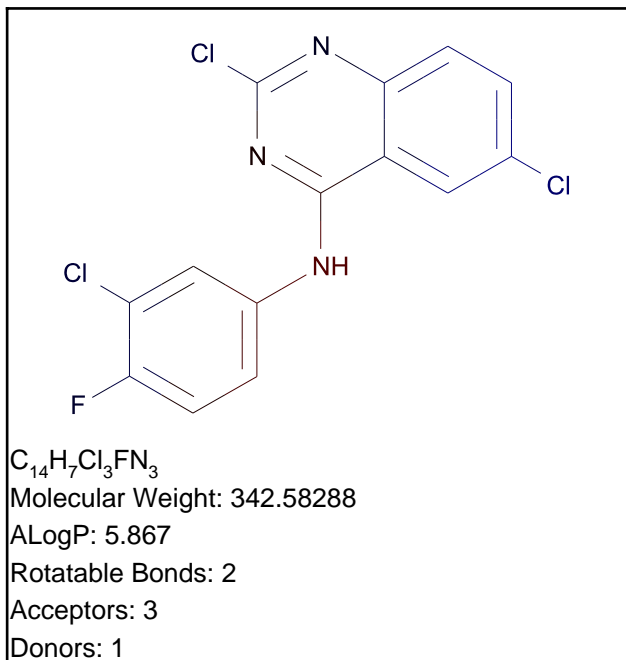

### Model Prediction

Prediction: Non-Carcinogen

Probability: 0.217

Enrichment: 0.673

Bayesian Score: -5.4

Mahalanobis Distance: 9.72

Mahalanobis Distance p-value: 0.503

Prediction: Positive if the Bayesian score is above the estimated best cutoff value from minimizing the false positive and false negative rate.

Probability: The estimated probability that the sample is in the positive category. This assumes that the Bayesian score follows a normal distribution and is different from the prediction using a cutoff.

Enrichment: An estimate of enrichment, that is, the increased likelihood (versus random) of this sample being in the category.

Bayesian Score: The standard Laplacian-modified Bayesian score.

Mahalanobis Distance: The Mahalanobis distance (MD) is the distance to the center of the training data. The larger the MD, the less trustworthy the prediction.

Mahalanobis Distance p-value: The p-value gives the fraction of training data with an MD greater than or equal to the one for the given sample, assuming normally distributed data. The smaller the p-value, the less trustworthy the prediction. For highly non-normal X properties (e.g., fingerprints), the MD p-value is wildly inaccurate.

### Structural Similar Compounds

| Name               | Mestranol                                                                           | Loratidine                                                                          | Levonorgestrel                                                                      |
|--------------------|-------------------------------------------------------------------------------------|-------------------------------------------------------------------------------------|-------------------------------------------------------------------------------------|
| Structure          | 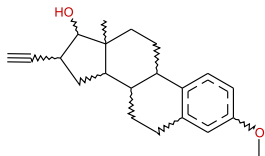 |  |  |
| Actual Endpoint    | Carcinogen                                                                          | Non-Carcinogen                                                                      | Non-Carcinogen                                                                      |
| Predicted Endpoint | Carcinogen                                                                          | Non-Carcinogen                                                                      | Carcinogen                                                                          |
| Distance           | 0.639                                                                               | 0.647                                                                               | 0.652                                                                               |
| Reference          | US FDA (Centre for Drug Eval.& Res./Off. Testing & Res.) Sept. 1997                 | US FDA (Centre for Drug Eval.& Res./Off. Testing & Res.) Sept. 1997                 | US FDA (Centre for Drug Eval.& Res./Off. Testing & Res.) Sept. 1997                 |

### Model Applicability

Unknown features are fingerprint features in the query molecule, but not found or appearing too infrequently in the training set.

1. All properties and OPS components are within expected ranges.
2. Unknown ECFP\_2 feature: 1126732433: [\*]:n:[c](Cl):n:[\*]

### Feature Contribution

#### Top features for positive contribution

| Fingerprint | Bit/Smiles | Feature Structure                                                                                                                 | Score | Carcinogen in training set |
|-------------|------------|-----------------------------------------------------------------------------------------------------------------------------------|-------|----------------------------|
| ECFP_12     | -177077903 | 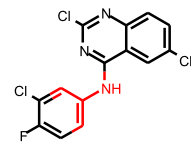<br><chem>[*]N[c](:[cH]:[*]):[c]H:[*]</chem> | 0.529 | 6 out of 10                |

| ECFP_12                                | 888054369  | 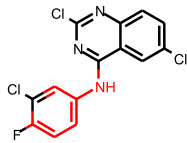<br><chem>[*]N[c]1:[cH]:[*]:[c]([*]):[cH]:[cH]:1</chem>           | 0.454  | 5 out of 9                 |
|----------------------------------------|------------|------------------------------------------------------------------------------------------------------------------------------------------------------|--------|----------------------------|
| ECFP_12                                | 1434334340 | <br><chem>[*][c]1:[*]:[cH]:[cH]:[c](N[c](:[*]):[*]):[cH]:1</chem> | 0.421  | 1 out of 1                 |
| Top Features for negative contribution |            |                                                                                                                                                      |        |                            |
| Fingerprint                            | Bit/Smiles | Feature Structure                                                                                                                                    | Score  | Carcinogen in training set |
| ECFP_12                                | 1335691903 | <br><chem>[*][c](:[*]):[c](Cl):[cH]:[*]</chem>                    | -1.11  | 2 out of 26                |
| ECFP_12                                | 99947387   | <br><chem>[*]:[c](:[*])Cl</chem>                                 | -0.817 | 8 out of 62                |
| ECFP_12                                | 1854732111 | <br><chem>[*]:[c]1:[*]:[cH]:[c](Cl):[cH]:[cH]:1</chem>          | -0.816 | 4 out of 33                |

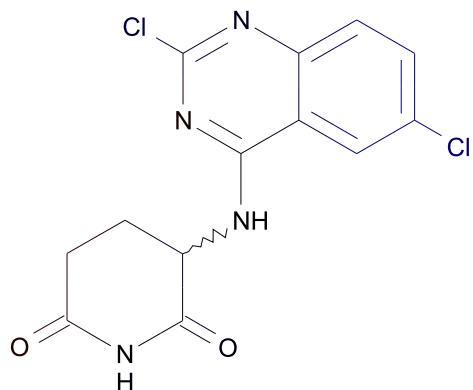

$C_{13}H_{10}Cl_2N_4O_2$

Molecular Weight: 325.15009

ALogP: 2.49

Rotatable Bonds: 2

Acceptors: 5

Donors: 2

## Model Prediction

Prediction: Non-Carcinogen

Probability: 0.227

Enrichment: 0.707

Bayesian Score: -4.46

Mahalanobis Distance: 11.5

Mahalanobis Distance p-value: 0.0199

Prediction: Positive if the Bayesian score is above the estimated best cutoff value from minimizing the false positive and false negative rate.

Probability: The estimated probability that the sample is in the positive category. This assumes that the Bayesian score follows a normal distribution and is different from the prediction using a cutoff.

Enrichment: An estimate of enrichment, that is, the increased likelihood (versus random) of this sample being in the category.

Bayesian Score: The standard Laplacian-modified Bayesian score.

Mahalanobis Distance: The Mahalanobis distance (MD) is the distance to the center of the training data. The larger the MD, the less trustworthy the prediction.

Mahalanobis Distance p-value: The p-value gives the fraction of training data with an MD greater than or equal to the one for the given sample, assuming normally distributed data. The smaller the p-value, the less trustworthy the prediction. For highly non-normal X properties (e.g., fingerprints), the MD p-value is wildly inaccurate.

## Structural Similar Compounds

| Name               | Metolazone                                                          | Naltrexone                                                          | Tolazamide                                                          |
|--------------------|---------------------------------------------------------------------|---------------------------------------------------------------------|---------------------------------------------------------------------|
| Structure          |                                                                     |                                                                     |                                                                     |
| Actual Endpoint    | Non-Carcinogen                                                      | Non-Carcinogen                                                      | Non-Carcinogen                                                      |
| Predicted Endpoint | Non-Carcinogen                                                      | Non-Carcinogen                                                      | Non-Carcinogen                                                      |
| Distance           | 0.578                                                               | 0.589                                                               | 0.594                                                               |
| Reference          | US FDA (Centre for Drug Eval.& Res./Off. Testing & Res.) Sept. 1997 | US FDA (Centre for Drug Eval.& Res./Off. Testing & Res.) Sept. 1997 | US FDA (Centre for Drug Eval.& Res./Off. Testing & Res.) Sept. 1997 |

## Model Applicability

Unknown features are fingerprint features in the query molecule, but not found or appearing too infrequently in the training set.

1. All properties and OPS components are within expected ranges.
2. Unknown ECFP\_2 feature: 1126732433: [\*]:n:[c](Cl):n:[\*]

## Feature Contribution

### Top features for positive contribution

| Fingerprint | Bit/Smiles | Feature Structure | Score | Carcinogen in training set |
|-------------|------------|-------------------|-------|----------------------------|
| ECFP_12     | -742538367 | <br>[*]CC(=O)N[*] | 0.445 | 3 out of 5                 |

| ECFP_12                                | 1049768340 | 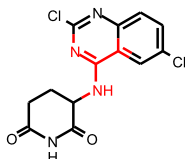<br><chem>[*]N[c](:n:[*]):[c](:[*]):[*]</chem>          | 0.421  | 1 out of 1                 |
|----------------------------------------|------------|--------------------------------------------------------------------------------------------------------------------------------------------|--------|----------------------------|
| ECFP_12                                | 51876938   | <br><chem>[*]CCC(=[*])[*]</chem>                        | 0.232  | 18 out of 45               |
| Top Features for negative contribution |            |                                                                                                                                            |        |                            |
| Fingerprint                            | Bit/Smiles | Feature Structure                                                                                                                          | Score  | Carcinogen in training set |
| ECFP_12                                | 99947387   | <br><chem>[*]:[c](:[*])Cl</chem>                        | -0.817 | 8 out of 62                |
| ECFP_12                                | 1854732111 | <br><chem>[*]:[c]1:[*]:[cH]:[c](Cl):[cH]:[cH]:1</chem> | -0.816 | 4 out of 33                |
| ECFP_12                                | -176494269 | <br><chem>[*]:[cH]:[c](Cl):[cH]:[*]</chem>            | -0.714 | 5 out of 36                |

15b

TOPKAT\_Rat\_Female\_FDA\_None\_vs\_Carcinogen

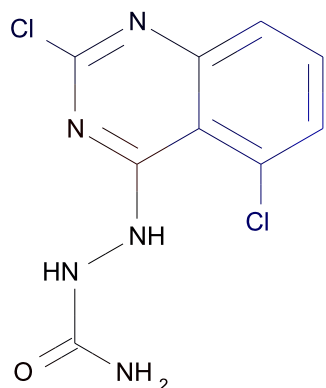C<sub>9</sub>H<sub>7</sub>Cl<sub>2</sub>N<sub>5</sub>O

Molecular Weight: 272.09077

ALogP: 2.379

Rotatable Bonds: 2

Acceptors: 4

Donors: 3

## Model Prediction

Prediction: Non-Carcinogen

Probability: 0.226

Enrichment: 0.703

Bayesian Score: -4.56

Mahalanobis Distance: 8.39

Mahalanobis Distance p-value: 0.957

Prediction: Positive if the Bayesian score is above the estimated best cutoff value from minimizing the false positive and false negative rate.

Probability: The estimated probability that the sample is in the positive category. This assumes that the Bayesian score follows a normal distribution and is different from the prediction using a cutoff.

Enrichment: An estimate of enrichment, that is, the increased likelihood (versus random) of this sample being in the category.

Bayesian Score: The standard Laplacian-modified Bayesian score.

Mahalanobis Distance: The Mahalanobis distance (MD) is the distance to the center of the training data. The larger the MD, the less trustworthy the prediction.

Mahalanobis Distance p-value: The p-value gives the fraction of training data with an MD greater than or equal to the one for the given sample, assuming normally distributed data. The smaller the p-value, the less trustworthy the prediction. For highly non-normal X properties (e.g., fingerprints), the MD p-value is wildly inaccurate.

## Structural Similar Compounds

| Name               | Lamotrigine                                                         | Guanfacine                                                          | Guanabenz                                                           |
|--------------------|---------------------------------------------------------------------|---------------------------------------------------------------------|---------------------------------------------------------------------|
| Structure          |                                                                     |                                                                     |                                                                     |
| Actual Endpoint    | Non-Carcinogen                                                      | Non-Carcinogen                                                      | Non-Carcinogen                                                      |
| Predicted Endpoint | Non-Carcinogen                                                      | Non-Carcinogen                                                      | Non-Carcinogen                                                      |
| Distance           | 0.608                                                               | 0.609                                                               | 0.628                                                               |
| Reference          | US FDA (Centre for Drug Eval.& Res./Off. Testing & Res.) Sept. 1997 | US FDA (Centre for Drug Eval.& Res./Off. Testing & Res.) Sept. 1997 | US FDA (Centre for Drug Eval.& Res./Off. Testing & Res.) Sept. 1997 |

## Model Applicability

Unknown features are fingerprint features in the query molecule, but not found or appearing too infrequently in the training set.

1. All properties and OPS components are within expected ranges.
2. Unknown ECFP\_2 feature: 1126732433: [\*]:n:[c](Cl):n:[\*]
3. Unknown ECFP\_2 feature: -1238415266: [\*]NN[c](:[\*]):[\*]

## Feature Contribution

### Top features for positive contribution

| Fingerprint | Bit/Smiles  | Feature Structure                                         | Score | Carcinogen in training set |
|-------------|-------------|-----------------------------------------------------------|-------|----------------------------|
| ECFP_12     | -1661653144 | <br>[*][c](:[*]):[c](:[c]<br>([*]):[*]):[c](:[*])<br>:[*] | 0.437 | 2 out of 3                 |

| ECFP_12                                | 1049768340 | 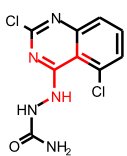<br><chem>[*]N[c](:n:[*]):[c](:[*]):[*]</chem>        | 0.421  | 1 out of 1                 |
|----------------------------------------|------------|------------------------------------------------------------------------------------------------------------------------------------------|--------|----------------------------|
| ECFP_12                                | 432952415  | <br><chem>[*]NC(=O)N</chem>                           | 0.208  | 1 out of 2                 |
| Top Features for negative contribution |            |                                                                                                                                          |        |                            |
| Fingerprint                            | Bit/Smiles | Feature Structure                                                                                                                        | Score  | Carcinogen in training set |
| ECFP_12                                | 1335691903 | <br><chem>[*][c](:[*]):[c](Cl):[cH]:[*]</chem>        | -1.11  | 2 out of 26                |
| ECFP_12                                | 1641317964 | <br><chem>[*]:[c]1:[*]:[cH]:[cH]:[cH]:[c]:1Cl</chem> | -0.929 | 1 out of 13                |
| ECFP_12                                | 99947387   | <br><chem>[*]:[c](:[*])Cl</chem>                    | -0.817 | 8 out of 62                |

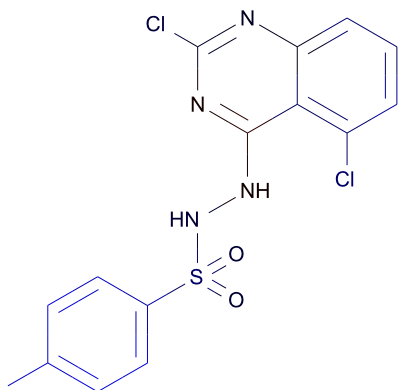

$C_{15}H_{12}Cl_2N_4O_2S$

Molecular Weight: 383.25237

ALogP: 4.443

Rotatable Bonds: 4

Acceptors: 5

Donors: 2

## Model Prediction

Prediction: Non-Carcinogen

Probability: 0.189

Enrichment: 0.588

Bayesian Score: -8.62

Mahalanobis Distance: 8.88

Mahalanobis Distance p-value: 0.858

Prediction: Positive if the Bayesian score is above the estimated best cutoff value from minimizing the false positive and false negative rate.

Probability: The estimated probability that the sample is in the positive category. This assumes that the Bayesian score follows a normal distribution and is different from the prediction using a cutoff.

Enrichment: An estimate of enrichment, that is, the increased likelihood (versus random) of this sample being in the category.

Bayesian Score: The standard Laplacian-modified Bayesian score.

Mahalanobis Distance: The Mahalanobis distance (MD) is the distance to the center of the training data. The larger the MD, the less trustworthy the prediction.

Mahalanobis Distance p-value: The p-value gives the fraction of training data with an MD greater than or equal to the one for the given sample, assuming normally distributed data. The smaller the p-value, the less trustworthy the prediction. For highly non-normal X properties (e.g., fingerprints), the MD p-value is wildly inaccurate.

## Structural Similar Compounds

| Name               | Niclosamide                                                         | Indapamide                                                          | Torsemide                                                           |
|--------------------|---------------------------------------------------------------------|---------------------------------------------------------------------|---------------------------------------------------------------------|
| Structure          |                                                                     |                                                                     |                                                                     |
| Actual Endpoint    | Non-Carcinogen                                                      | Non-Carcinogen                                                      | Carcinogen                                                          |
| Predicted Endpoint | Non-Carcinogen                                                      | Non-Carcinogen                                                      | Carcinogen                                                          |
| Distance           | 0.647                                                               | 0.663                                                               | 0.670                                                               |
| Reference          | US FDA (Centre for Drug Eval.& Res./Off. Testing & Res.) Sept. 1997 | US FDA (Centre for Drug Eval.& Res./Off. Testing & Res.) Sept. 1997 | US FDA (Centre for Drug Eval.& Res./Off. Testing & Res.) Sept. 1997 |

## Model Applicability

Unknown features are fingerprint features in the query molecule, but not found or appearing too infrequently in the training set.

1. All properties and OPS components are within expected ranges.
2. Unknown ECFP\_2 feature: 1126732433: [\*]:n:[c](Cl):n:[\*]
3. Unknown ECFP\_2 feature: -1238415266: [\*]NN[c](:[\*]):[\*]
4. Unknown ECFP\_2 feature: 944235823: [\*]NNS(=[\*])(=[\*])[\*]

## Feature Contribution

### Top features for positive contribution

| Fingerprint | Bit/Smiles  | Feature Structure                                 | Score | Carcinogen in training set |
|-------------|-------------|---------------------------------------------------|-------|----------------------------|
| ECFP_12     | -1661653144 | <br>[*][c](:[*]):[c](:[c]([*]):[*]):[c](:[*]):[*] | 0.437 | 2 out of 3                 |

| ECFP_12                                | 1049768340  | 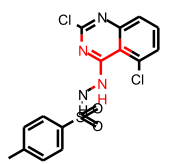<br><chem>[*]N[c](:n:[*]):[c](:[*]):[*]</chem>          | 0.421 | 1 out of 1                 |
|----------------------------------------|-------------|--------------------------------------------------------------------------------------------------------------------------------------------|-------|----------------------------|
| ECFP_12                                | -1074141656 | <br><chem>[*]=O</chem>                                  | 0.103 | 86 out of 248              |
| Top Features for negative contribution |             |                                                                                                                                            |       |                            |
| Fingerprint                            | Bit/Smiles  | Feature Structure                                                                                                                          | Score | Carcinogen in training set |
| ECFP_12                                | 1335691903  | <br><chem>[*][c](:[*]):[c](Cl):[cH]:[*]</chem>          | -1.11 | 2 out of 26                |
| ECFP_12                                | -533780882  | <br><chem>C[c]1:[cH]:[cH]:[*]:[cH]:[cH]:1</chem>       | -1.06 | 0 out of 6                 |
| ECFP_12                                | -1926229349 | <br><chem>[*][c]1:[cH]:[cH]:[c](C):[cH]:[cH]:1</chem> | -1.06 | 0 out of 6                 |

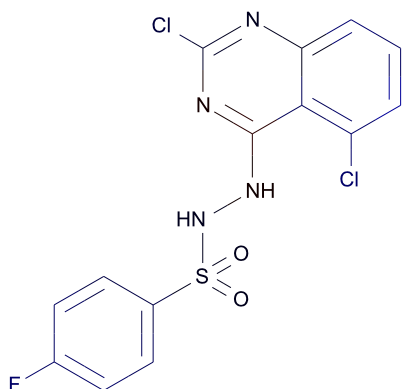

$C_{14}H_9Cl_2FN_4O_2S$

Molecular Weight: 387.21626

ALogP: 4.162

Rotatable Bonds: 4

Acceptors: 5

Donors: 2

## Model Prediction

Prediction: Non-Carcinogen

Probability: 0.202

Enrichment: 0.627

Bayesian Score: -6.95

Mahalanobis Distance: 9.01

Mahalanobis Distance p-value: 0.816

Prediction: Positive if the Bayesian score is above the estimated best cutoff value from minimizing the false positive and false negative rate.

Probability: The estimated probability that the sample is in the positive category. This assumes that the Bayesian score follows a normal distribution and is different from the prediction using a cutoff.

Enrichment: An estimate of enrichment, that is, the increased likelihood (versus random) of this sample being in the category.

Bayesian Score: The standard Laplacian-modified Bayesian score.

Mahalanobis Distance: The Mahalanobis distance (MD) is the distance to the center of the training data. The larger the MD, the less trustworthy the prediction.

Mahalanobis Distance p-value: The p-value gives the fraction of training data with an MD greater than or equal to the one for the given sample, assuming normally distributed data. The smaller the p-value, the less trustworthy the prediction. For highly non-normal X properties (e.g., fingerprints), the MD p-value is wildly inaccurate.

## Structural Similar Compounds

| Name               | Bicalutamide                                                        | Niclosamide                                                         | Indapamide                                                          |
|--------------------|---------------------------------------------------------------------|---------------------------------------------------------------------|---------------------------------------------------------------------|
| Structure          |                                                                     |                                                                     |                                                                     |
| Actual Endpoint    | Carcinogen                                                          | Non-Carcinogen                                                      | Non-Carcinogen                                                      |
| Predicted Endpoint | Carcinogen                                                          | Non-Carcinogen                                                      | Non-Carcinogen                                                      |
| Distance           | 0.632                                                               | 0.637                                                               | 0.645                                                               |
| Reference          | US FDA (Centre for Drug Eval.& Res./Off. Testing & Res.) Sept. 1997 | US FDA (Centre for Drug Eval.& Res./Off. Testing & Res.) Sept. 1997 | US FDA (Centre for Drug Eval.& Res./Off. Testing & Res.) Sept. 1997 |

## Model Applicability

Unknown features are fingerprint features in the query molecule, but not found or appearing too infrequently in the training set.

1. All properties and OPS components are within expected ranges.
2. Unknown ECFP\_2 feature: 1126732433: [\*]:n:[c](Cl):n:[\*]
3. Unknown ECFP\_2 feature: -1238415266: [\*]NN[c](:[\*]):[\*]
4. Unknown ECFP\_2 feature: 944235823: [\*]NNS(=[\*])(=[\*])[\*]

## Feature Contribution

### Top features for positive contribution

| Fingerprint | Bit/Smiles  | Feature Structure                                 | Score | Carcinogen in training set |
|-------------|-------------|---------------------------------------------------|-------|----------------------------|
| ECFP_12     | -1661653144 | <br>[*][c](:[*]):[c](:[c]([*]):[*]):[c](:[*]):[*] | 0.437 | 2 out of 3                 |

| ECFP_12                                | 74189795   | 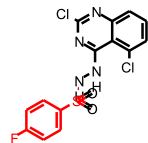<br><chem>[*]S(=[*])(=[*])[c]1:[cH]:[cH]:[c](F):[cH]:[cH]:1</chem> | 0.421  | 1 out of 1                 |
|----------------------------------------|------------|-------------------------------------------------------------------------------------------------------------------------------------------------------|--------|----------------------------|
| ECFP_12                                | 1049768340 | <br><chem>[*]N[c](:n:[*]):[c](:[*]):[*]</chem>                     | 0.421  | 1 out of 1                 |
| Top Features for negative contribution |            |                                                                                                                                                       |        |                            |
| Fingerprint                            | Bit/Smiles | Feature Structure                                                                                                                                     | Score  | Carcinogen in training set |
| ECFP_12                                | 1335691903 | <br><chem>[*][c](:[*]):[c](Cl):[cH]:[*]</chem>                     | -1.11  | 2 out of 26                |
| ECFP_12                                | 1641317964 | <br><chem>[*]:[c]1:[*]:[cH]:[cH]:[cH]:[c]:1Cl</chem>              | -0.929 | 1 out of 13                |
| ECFP_12                                | 99947387   | <br><chem>[*]:[c](:[*])Cl</chem>                                 | -0.817 | 8 out of 62                |

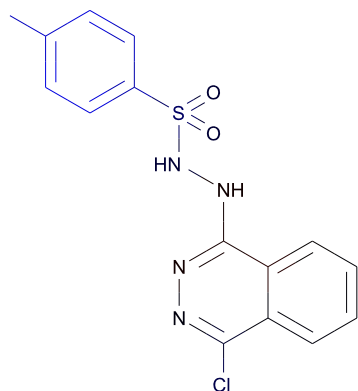

$C_{15}H_{13}ClN_4O_2S$

Molecular Weight: 348.80731

ALogP: 3.529

Rotatable Bonds: 4

Acceptors: 5

Donors: 2

## Model Prediction

Prediction: Non-Carcinogen

Probability: 0.202

Enrichment: 0.628

Bayesian Score: -6.93

Mahalanobis Distance: 10.2

Mahalanobis Distance p-value: 0.3

Prediction: Positive if the Bayesian score is above the estimated best cutoff value from minimizing the false positive and false negative rate.

Probability: The estimated probability that the sample is in the positive category. This assumes that the Bayesian score follows a normal distribution and is different from the prediction using a cutoff.

Enrichment: An estimate of enrichment, that is, the increased likelihood (versus random) of this sample being in the category.

Bayesian Score: The standard Laplacian-modified Bayesian score.

Mahalanobis Distance: The Mahalanobis distance (MD) is the distance to the center of the training data. The larger the MD, the less trustworthy the prediction.

Mahalanobis Distance p-value: The p-value gives the fraction of training data with an MD greater than or equal to the one for the given sample, assuming normally distributed data. The smaller the p-value, the less trustworthy the prediction. For highly non-normal X properties (e.g., fingerprints), the MD p-value is wildly inaccurate.

## Structural Similar Compounds

| Name               | Niclosamide                                                         | Indapamide                                                          | Tolazamide                                                          |
|--------------------|---------------------------------------------------------------------|---------------------------------------------------------------------|---------------------------------------------------------------------|
| Structure          |                                                                     |                                                                     |                                                                     |
| Actual Endpoint    | Non-Carcinogen                                                      | Non-Carcinogen                                                      | Non-Carcinogen                                                      |
| Predicted Endpoint | Non-Carcinogen                                                      | Non-Carcinogen                                                      | Non-Carcinogen                                                      |
| Distance           | 0.592                                                               | 0.594                                                               | 0.605                                                               |
| Reference          | US FDA (Centre for Drug Eval.& Res./Off. Testing & Res.) Sept. 1997 | US FDA (Centre for Drug Eval.& Res./Off. Testing & Res.) Sept. 1997 | US FDA (Centre for Drug Eval.& Res./Off. Testing & Res.) Sept. 1997 |

## Model Applicability

Unknown features are fingerprint features in the query molecule, but not found or appearing too infrequently in the training set.

1. All properties and OPS components are within expected ranges.
2. Unknown ECFP\_2 feature: -1238415266: [\*]NN[c](:[\*]):[\*]
3. Unknown ECFP\_2 feature: 944235823: [\*]NNS(=[\*])(=[\*])[\*]

## Feature Contribution

### Top features for positive contribution

| Fingerprint | Bit/Smiles | Feature Structure                 | Score | Carcinogen in training set |
|-------------|------------|-----------------------------------|-------|----------------------------|
| ECFP_12     | 1049768340 | <br>[*]N[c](:n:[*]):[c](:[*]):[*] | 0.421 | 1 out of 1                 |

| ECFP_12                                | 1306977740  | 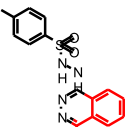<br><chem>[*][c](:[*]):[c]([cH] ):[cH]:[cH]:[cH]:[c] :1:[*]</chem> | 0.271  | 4 out of 9                 |
|----------------------------------------|-------------|-------------------------------------------------------------------------------------------------------------------------------------------------------|--------|----------------------------|
| ECFP_12                                | 1639858918  | <br><chem>[*][c](:[*]):[c]([cH] ):[cH]:[cH]:[*]:[c] :1:[*]</chem>  | 0.119  | 4 out of 11                |
| Top Features for negative contribution |             |                                                                                                                                                       |        |                            |
| Fingerprint                            | Bit/Smiles  | Feature Structure                                                                                                                                     | Score  | Carcinogen in training set |
| ECFP_12                                | -1926229349 | <br><chem>[*][c]1:[cH]:[cH]:[c] (C):[cH]:[cH]:1</chem>             | -1.06  | 0 out of 6                 |
| ECFP_12                                | -533780882  | <br><chem>C[c]1:[cH]:[cH]:[*]:[cH]:[cH]:1</chem>                  | -1.06  | 0 out of 6                 |
| ECFP_12                                | 99947387    | <br><chem>[*]:[c](:[*])Cl</chem>                                 | -0.817 | 8 out of 62                |

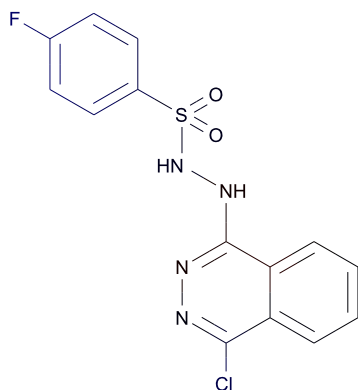

$C_{14}H_{10}ClFN_4O_2S$

Molecular Weight: 352.7712

ALogP: 3.248

Rotatable Bonds: 4

Acceptors: 5

Donors: 2

## Model Prediction

Prediction: Non-Carcinogen

Probability: 0.224

Enrichment: 0.695

Bayesian Score: -4.77

Mahalanobis Distance: 9.96

Mahalanobis Distance p-value: 0.385

Prediction: Positive if the Bayesian score is above the estimated best cutoff value from minimizing the false positive and false negative rate.

Probability: The estimated probability that the sample is in the positive category. This assumes that the Bayesian score follows a normal distribution and is different from the prediction using a cutoff.

Enrichment: An estimate of enrichment, that is, the increased likelihood (versus random) of this sample being in the category.

Bayesian Score: The standard Laplacian-modified Bayesian score.

Mahalanobis Distance: The Mahalanobis distance (MD) is the distance to the center of the training data. The larger the MD, the less trustworthy the prediction.

Mahalanobis Distance p-value: The p-value gives the fraction of training data with an MD greater than or equal to the one for the given sample, assuming normally distributed data. The smaller the p-value, the less trustworthy the prediction. For highly non-normal X properties (e.g., fingerprints), the MD p-value is wildly inaccurate.

## Structural Similar Compounds

| Name               | Indapamide                                                          | Niclosamide                                                         | Acetohexamide                                                       |
|--------------------|---------------------------------------------------------------------|---------------------------------------------------------------------|---------------------------------------------------------------------|
| Structure          |                                                                     |                                                                     |                                                                     |
| Actual Endpoint    | Non-Carcinogen                                                      | Non-Carcinogen                                                      | Non-Carcinogen                                                      |
| Predicted Endpoint | Non-Carcinogen                                                      | Non-Carcinogen                                                      | Non-Carcinogen                                                      |
| Distance           | 0.583                                                               | 0.595                                                               | 0.598                                                               |
| Reference          | US FDA (Centre for Drug Eval.& Res./Off. Testing & Res.) Sept. 1997 | US FDA (Centre for Drug Eval.& Res./Off. Testing & Res.) Sept. 1997 | US FDA (Centre for Drug Eval.& Res./Off. Testing & Res.) Sept. 1997 |

## Model Applicability

Unknown features are fingerprint features in the query molecule, but not found or appearing too infrequently in the training set.

1. All properties and OPS components are within expected ranges.
2. Unknown ECFP\_2 feature: -1238415266: [\*]NN[c](:[\*]):[\*]
3. Unknown ECFP\_2 feature: 944235823: [\*]NNS(=[\*])(=[\*])[\*]

## Feature Contribution

### Top features for positive contribution

| Fingerprint | Bit/Smiles | Feature Structure                 | Score | Carcinogen in training set |
|-------------|------------|-----------------------------------|-------|----------------------------|
| ECFP_12     | 1049768340 | <br>[*]N[c](:n:[*]):[c](:[*]):[*] | 0.421 | 1 out of 1                 |

| ECFP_12                                | 74189795    | 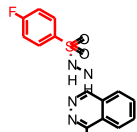<br><chem>[*]S(=[*])(=[*])[c]1: [cH]:[cH]:[c](F):[cH ]:[cH]:1</chem> | 0.421  | 1 out of 1                 |
|----------------------------------------|-------------|---------------------------------------------------------------------------------------------------------------------------------------------------------|--------|----------------------------|
| ECFP_12                                | 1306977740  | <br><chem>[*][c](:[*]):[c]1:[cH ]:[cH]:[cH]:[cH]:[c]:1:[*]</chem>    | 0.271  | 4 out of 9                 |
| Top Features for negative contribution |             |                                                                                                                                                         |        |                            |
| Fingerprint                            | Bit/Smiles  | Feature Structure                                                                                                                                       | Score  | Carcinogen in training set |
| ECFP_12                                | 99947387    | <br><chem>[*]:[c](:[*])Cl</chem>                                     | -0.817 | 8 out of 62                |
| ECFP_12                                | -296909061  | <br><chem>F[c]1:[cH]:[cH]:[*]:[cH]:[cH]:1</chem>                    | -0.56  | 1 out of 8                 |
| ECFP_12                                | -1659169698 | <br><chem>[*][c]1:[cH]:[cH]:[c](F):[cH]:[cH]:1</chem>              | -0.56  | 1 out of 8                 |

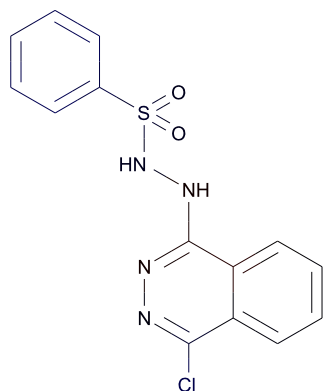

$C_{14}H_{11}ClN_4O_2S$

Molecular Weight: 334.78073

ALogP: 3.043

Rotatable Bonds: 4

Acceptors: 5

Donors: 2

## Model Prediction

Prediction: Non-Carcinogen

Probability: 0.223

Enrichment: 0.693

Bayesian Score: -4.83

Mahalanobis Distance: 10.6

Mahalanobis Distance p-value: 0.137

Prediction: Positive if the Bayesian score is above the estimated best cutoff value from minimizing the false positive and false negative rate.

Probability: The estimated probability that the sample is in the positive category. This assumes that the Bayesian score follows a normal distribution and is different from the prediction using a cutoff.

Enrichment: An estimate of enrichment, that is, the increased likelihood (versus random) of this sample being in the category.

Bayesian Score: The standard Laplacian-modified Bayesian score.

Mahalanobis Distance: The Mahalanobis distance (MD) is the distance to the center of the training data. The larger the MD, the less trustworthy the prediction.

Mahalanobis Distance p-value: The p-value gives the fraction of training data with an MD greater than or equal to the one for the given sample, assuming normally distributed data. The smaller the p-value, the less trustworthy the prediction. For highly non-normal X properties (e.g., fingerprints), the MD p-value is wildly inaccurate.

## Structural Similar Compounds

| Name               | Acetohexamide                                                       | Mebendazole                                                         | Indapamide                                                          |
|--------------------|---------------------------------------------------------------------|---------------------------------------------------------------------|---------------------------------------------------------------------|
| Structure          |                                                                     |                                                                     |                                                                     |
| Actual Endpoint    | Non-Carcinogen                                                      | Non-Carcinogen                                                      | Non-Carcinogen                                                      |
| Predicted Endpoint | Non-Carcinogen                                                      | Non-Carcinogen                                                      | Non-Carcinogen                                                      |
| Distance           | 0.579                                                               | 0.581                                                               | 0.584                                                               |
| Reference          | US FDA (Centre for Drug Eval.& Res./Off. Testing & Res.) Sept. 1997 | US FDA (Centre for Drug Eval.& Res./Off. Testing & Res.) Sept. 1997 | US FDA (Centre for Drug Eval.& Res./Off. Testing & Res.) Sept. 1997 |

## Model Applicability

Unknown features are fingerprint features in the query molecule, but not found or appearing too infrequently in the training set.

1. All properties and OPS components are within expected ranges.
2. Unknown ECFP\_2 feature: -1238415266: [\*]NN[c](:[\*]):[\*]
3. Unknown ECFP\_2 feature: 944235823: [\*]NNS(=[\*])(=[\*])[\*]

## Feature Contribution

### Top features for positive contribution

| Fingerprint | Bit/Smiles | Feature Structure                 | Score | Carcinogen in training set |
|-------------|------------|-----------------------------------|-------|----------------------------|
| ECFP_12     | 1049768340 | <br>[*]N[c](:n:[*]):[c](:[*]):[*] | 0.421 | 1 out of 1                 |

| ECFP_12                                | 1306977740 | 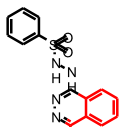<br><chem>[*][c](:[*]):[c]1:[cH]:[cH]:[cH]:[c]:1:[*]</chem>     | 0.271  | 4 out of 9                 |
|----------------------------------------|------------|----------------------------------------------------------------------------------------------------------------------------------------------------|--------|----------------------------|
| ECFP_12                                | 1639858918 | <br><chem>[*][c](:[*]):[c]1:[cH]:[cH]:[cH]:[*]:[c]:1:[*]</chem> | 0.119  | 4 out of 11                |
| Top Features for negative contribution |            |                                                                                                                                                    |        |                            |
| Fingerprint                            | Bit/Smiles | Feature Structure                                                                                                                                  | Score  | Carcinogen in training set |
| ECFP_12                                | 99947387   | <br><chem>[*]:[c](:[*])Cl</chem>                                | -0.817 | 8 out of 62                |
| ECFP_12                                | -281505363 | <br><chem>[*][c]1:[cH]:[cH]:[cH]:[cH]:[cH]:1</chem>            | -0.56  | 11 out of 64               |
| ECFP_12                                | 1571214559 | <br><chem>[*]1:[cH]:[cH]:[cH]:[cH]:[cH]:1</chem>              | -0.56  | 11 out of 64               |

# Thalidomide

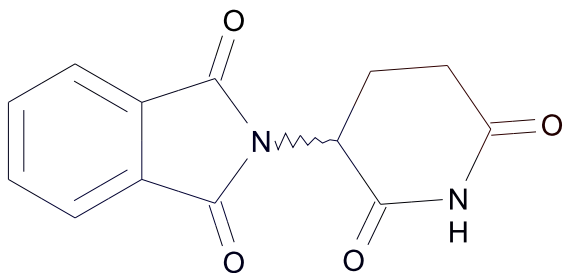

$C_{13}H_{10}N_2O_4$

Molecular Weight: 258.22949

ALogP: 9.7e-002

Rotatable Bonds: 1

Acceptors: 4

Donors: 1

## Model Prediction

**Prediction: Carcinogen**

Probability: 0.283

Enrichment: 0.879

Bayesian Score: -0.795

Mahalanobis Distance: 8.89

Mahalanobis Distance p-value: 0.853

Prediction: Positive if the Bayesian score is above the estimated best cutoff value from minimizing the false positive and false negative rate.

Probability: The estimated probability that the sample is in the positive category. This assumes that the Bayesian score follows a normal distribution and is different from the prediction using a cutoff.

Enrichment: An estimate of enrichment, that is, the increased likelihood (versus random) of this sample being in the category.

Bayesian Score: The standard Laplacian-modified Bayesian score.

Mahalanobis Distance: The Mahalanobis distance (MD) is the distance to the center of the training data. The larger the MD, the less trustworthy the prediction.

Mahalanobis Distance p-value: The p-value gives the fraction of training data with an MD greater than or equal to the one for the given sample, assuming normally distributed data. The smaller the p-value, the less trustworthy the prediction. For highly non-normal X properties (e.g., fingerprints), the MD p-value is wildly inaccurate.

# TOPKAT\_Rat\_Female\_FDA\_None\_vs\_Carcinogen

## Structural Similar Compounds

| Name               | Pemoline                                                            | Nalidixic acid                                                      | Milrinone                                                           |
|--------------------|---------------------------------------------------------------------|---------------------------------------------------------------------|---------------------------------------------------------------------|
| Structure          |                                                                     |                                                                     |                                                                     |
| Actual Endpoint    | Non-Carcinogen                                                      | Carcinogen                                                          | Carcinogen                                                          |
| Predicted Endpoint | Non-Carcinogen                                                      | Carcinogen                                                          | Carcinogen                                                          |
| Distance           | 0.629                                                               | 0.638                                                               | 0.647                                                               |
| Reference          | US FDA (Centre for Drug Eval.& Res./Off. Testing & Res.) Sept. 1997 | US FDA (Centre for Drug Eval.& Res./Off. Testing & Res.) Sept. 1997 | US FDA (Centre for Drug Eval.& Res./Off. Testing & Res.) Sept. 1997 |

## Model Applicability

Unknown features are fingerprint features in the query molecule, but not found or appearing too infrequently in the training set.

1. All properties and OPS components are within expected ranges.

## Feature Contribution

### Top features for positive contribution

| Fingerprint | Bit/Smiles | Feature Structure | Score | Carcinogen in training set |
|-------------|------------|-------------------|-------|----------------------------|
| ECFP_12     | -742538367 | <br>[*]CC(=O)N[*] | 0.445 | 3 out of 5                 |

|                                        |             |                                                                                                                                            |        |                            |
|----------------------------------------|-------------|--------------------------------------------------------------------------------------------------------------------------------------------|--------|----------------------------|
| ECFP_12                                | 51876938    | 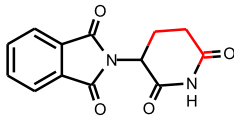<br><chem>[*]CCC(=[*])[*]</chem>                        | 0.232  | 18 out of 45               |
| ECFP_12                                | -2105515128 | <br><chem>[*]=C1[*]CCC(=O)N1</chem>                     | 0.208  | 1 out of 2                 |
| Top Features for negative contribution |             |                                                                                                                                            |        |                            |
| Fingerprint                            | Bit/Smiles  | Feature Structure                                                                                                                          | Score  | Carcinogen in training set |
| ECFP_12                                | -867777309  | <br><chem>[*]NC(=O)C([*])[*]</chem>                     | -0.661 | 0 out of 3                 |
| ECFP_12                                | 1997021792  | <br><chem>[*]:[cH]:[cH]:[cH]:[*]<br/>]</chem>         | -0.296 | 36 out of 156              |
| ECFP_12                                | -957084426  | <br><chem>[*]C([*])N1C(=[*])[*]<br/>:[*]C1=[*]</chem> | -0.272 | 0 out of 1                 |

# Thalidomide

# TOPKAT\_Rat\_Female\_FDA\_Single\_vs\_Multiple

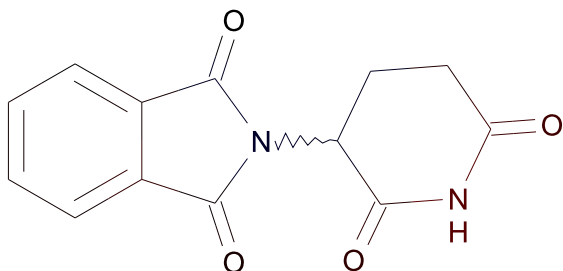

C<sub>13</sub>H<sub>10</sub>N<sub>2</sub>O<sub>4</sub>

Molecular Weight: 258.22949

ALogP: 9.7e-002

Rotatable Bonds: 1

Acceptors: 4

Donors: 1

## Model Prediction

**Prediction: Multiple-Carcinogen**

Probability: 0.524

Enrichment: 1.4

Bayesian Score: 0.842

Mahalanobis Distance: 12.4

Mahalanobis Distance p-value: 0.000809

Prediction: Positive if the Bayesian score is above the estimated best cutoff value from minimizing the false positive and false negative rate.

Probability: The estimated probability that the sample is in the positive category. This assumes that the Bayesian score follows a normal distribution and is different from the prediction using a cutoff.

Enrichment: An estimate of enrichment, that is, the increased likelihood (versus random) of this sample being in the category.

Bayesian Score: The standard Laplacian-modified Bayesian score.

Mahalanobis Distance: The Mahalanobis distance (MD) is the distance to the center of the training data. The larger the MD, the less trustworthy the prediction.

Mahalanobis Distance p-value: The p-value gives the fraction of training data with an MD greater than or equal to the one for the given sample, assuming normally distributed data. The smaller the p-value, the less trustworthy the prediction. For highly non-normal X properties (e.g., fingerprints), the MD p-value is wildly inaccurate.

## Structural Similar Compounds

| Name               | Aminogluthethimide                                                  | Phenobarbital                                                       | Nalidixic acid                                                      |
|--------------------|---------------------------------------------------------------------|---------------------------------------------------------------------|---------------------------------------------------------------------|
| Structure          |                                                                     |                                                                     |                                                                     |
| Actual Endpoint    | Multiple-Carcinogen                                                 | Single-Carcinogen                                                   | Single-Carcinogen                                                   |
| Predicted Endpoint | Multiple-Carcinogen                                                 | Single-Carcinogen                                                   | Single-Carcinogen                                                   |
| Distance           | 0.579                                                               | 0.599                                                               | 0.599                                                               |
| Reference          | US FDA (Centre for Drug Eval.& Res./Off. Testing & Res.) Sept. 1997 | US FDA (Centre for Drug Eval.& Res./Off. Testing & Res.) Sept. 1997 | US FDA (Centre for Drug Eval.& Res./Off. Testing & Res.) Sept. 1997 |

## Model Applicability

Unknown features are fingerprint features in the query molecule, but not found or appearing too infrequently in the training set.

1. All properties and OPS components are within expected ranges.

## Feature Contribution

### Top features for positive contribution

| Fingerprint | Bit/Smiles | Feature Structure                                           | Score | Multiple-Carcinogen in training set |
|-------------|------------|-------------------------------------------------------------|-------|-------------------------------------|
| SCFP_4      | 387787917  | <br><chem>[*]=C1[*][*][c]2:[*]:[cH]:[cH]:[cH]:[c]1:2</chem> | 0.449 | 6 out of 11                         |

|                                        |             |                                                                                                                                       |        |                                     |
|----------------------------------------|-------------|---------------------------------------------------------------------------------------------------------------------------------------|--------|-------------------------------------|
| SCFP_4                                 | 1257084377  | 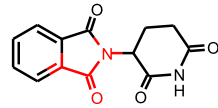<br><chem>[*]N1[*][*]:[c](:[*])C1=O</chem>         | 0.44   | 3 out of 5                          |
| SCFP_4                                 | 345243876   | <br><chem>[*]=C1[*]CCC(=O)N1</chem>                | 0.419  | 1 out of 1                          |
| Top Features for negative contribution |             |                                                                                                                                       |        |                                     |
| Fingerprint                            | Bit/Smiles  | Feature Structure                                                                                                                     | Score  | Multiple-Carcinogen in training set |
| SCFP_4                                 | -1946889102 | <br><chem>[*]CC(N([*])[*])C(=[*])[*]</chem>        | -0.816 | 0 out of 4                          |
| SCFP_4                                 | 399659969   | <br><chem>[*]C([*])N1C(=[*])[*]:[*]C1=[*]</chem> | -0.666 | 0 out of 3                          |
| SCFP_4                                 | -1272798659 | <br><chem>[*]CCC([*])[*]</chem>                  | -0.421 | 10 out of 50                        |

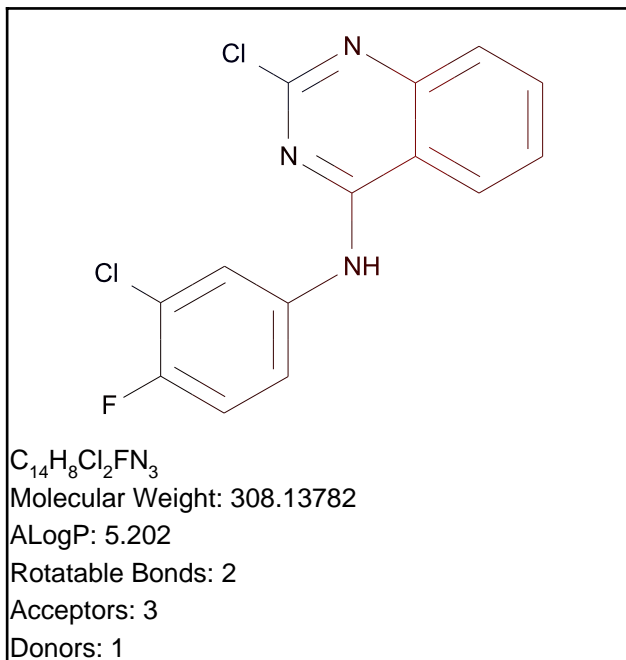

### Model Prediction

Prediction: **Carcinogen**

Probability: 0.454

Enrichment: 1.36

Bayesian Score: 3.08

Mahalanobis Distance: 13.9

Mahalanobis Distance p-value: 5.62e-005

Prediction: Positive if the Bayesian score is above the estimated best cutoff value from minimizing the false positive and false negative rate.

Probability: The estimated probability that the sample is in the positive category. This assumes that the Bayesian score follows a normal distribution and is different from the prediction using a cutoff.

Enrichment: An estimate of enrichment, that is, the increased likelihood (versus random) of this sample being in the category.

Bayesian Score: The standard Laplacian-modified Bayesian score.

Mahalanobis Distance: The Mahalanobis distance (MD) is the distance to the center of the training data. The larger the MD, the less trustworthy the prediction.

Mahalanobis Distance p-value: The p-value gives the fraction of training data with an MD greater than or equal to the one for the given sample, assuming normally distributed data. The smaller the p-value, the less trustworthy the prediction. For highly non-normal X properties (e.g., fingerprints), the MD p-value is wildly inaccurate.

### Structural Similar Compounds

| Name               | Meclofenamate                                                                       | Nafenopin                                                                           | Mestranol                                                                           |
|--------------------|-------------------------------------------------------------------------------------|-------------------------------------------------------------------------------------|-------------------------------------------------------------------------------------|
| Structure          | 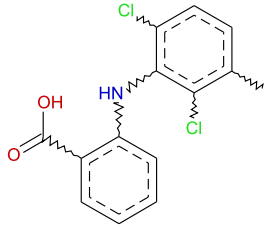 |  |  |
| Actual Endpoint    | Non-Carcinogen                                                                      | Carcinogen                                                                          | Carcinogen                                                                          |
| Predicted Endpoint | Non-Carcinogen                                                                      | Carcinogen                                                                          | Carcinogen                                                                          |
| Distance           | 0.605                                                                               | 0.609                                                                               | 0.613                                                                               |
| Reference          | US FDA (Centre for Drug Eval.& Res./Off. Testing & Res.) Sept. 1997                 | US FDA (Centre for Drug Eval.& Res./Off. Testing & Res.) Sept. 1997                 | US FDA (Centre for Drug Eval.& Res./Off. Testing & Res.) Sept. 1997                 |

### Model Applicability

Unknown features are fingerprint features in the query molecule, but not found or appearing too infrequently in the training set.

- OPS PC15 out of range. Value: 5.9999. Training min, max, SD, explained variance: -4.0246, 5.5336, 1.388, 0.0180.

### Feature Contribution

| Top features for positive contribution |            |                                                                                                                                                       |       |                            |
|----------------------------------------|------------|-------------------------------------------------------------------------------------------------------------------------------------------------------|-------|----------------------------|
| Fingerprint                            | Bit/Smiles | Feature Structure                                                                                                                                     | Score | Carcinogen in training set |
| SCFP_6                                 | 1651620003 | 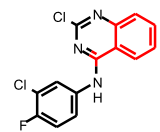<br><chem>[*][c](:[*]):[c]1:[cH]:[cH]:[cH]:[cH]:[c]:1:[*]</chem> | 0.643 | 7 out of 10                |

| SCFP_6                                 | -1379673609 | 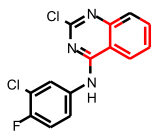<br><chem>[*][c](:[*]):[c]1:[cH]:[cH]:[cH]:[*]:[c]:1:[*]</chem>                 | 0.526  | 11 out of 19               |
|----------------------------------------|-------------|--------------------------------------------------------------------------------------------------------------------------------------------------------------------|--------|----------------------------|
| SCFP_6                                 | 1655199790  | <br><chem>[*]:n:[c]1:[cH]:[cH]:[cH]:[cH]:[c]:1:[*]</chem>                       | 0.52   | 5 out of 8                 |
| Top Features for negative contribution |             |                                                                                                                                                                    |        |                            |
| Fingerprint                            | Bit/Smiles  | Feature Structure                                                                                                                                                  | Score  | Carcinogen in training set |
| SCFP_6                                 | -52074512   | <br><chem>[*]:[c](:[*])Cl</chem>                                                | -0.315 | 14 out of 61               |
| SCFP_6                                 | -601571304  | <br><chem>[*][c](:[*]):[c](Cl):[cH]:[*]</chem>                                 | -0.3   | 14 out of 60               |
| SCFP_6                                 | 403834996   | <br><chem>[*][c]1:[*]:[c]([*]):[c]2:[cH]:[cH]:[cH]:[cH]:[cH]:[c]:2:n:1</chem> | -0.264 | 1 out of 5                 |

**7a**

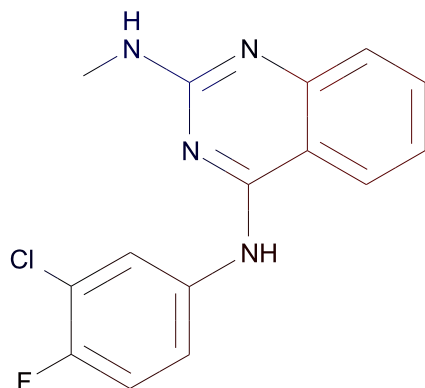
$$\text{C}_{15}\text{H}_{12}\text{ClFN}_4$$

Molecular Weight: 302.73398

|ALogP: 4.677

Rotatable Bonds: 3

Acceptors: 4

Donors: 2

## Model Prediction

**Prediction: Carcinogen**

Probability: 0.417

Enrichment: 1.25

Bayesian Score: 1.98

Mahalanobis Distance: 13.9

Mahalanobis Distance p-value: 5.82e-005

Prediction: Positive if the Bayesian score is above the estimated best cutoff value from minimizing the false positive and false negative rate.

**Probability:** The estimated probability that the sample is in the positive category. This assumes that the Bayesian score follows a normal distribution and is different from the prediction using a cutoff.

Enrichment: An estimate of enrichment, that is, the increased likelihood (versus random) of this sample being in the category.  
Bayesian Score: The standard Laplacian-modified Bayesian score.

**Mahalanobis Distance:** The Mahalanobis distance (MD) is the distance to the center of the training data. The larger the MD, the less trustworthy the prediction.

Mahalanobis Distance p-value: The p-value gives the fraction of training data with an MD greater than or equal to the one for the given sample, assuming normally distributed data. The smaller the p-value, the less trustworthy the prediction. For highly non-normal X properties (e.g., fingerprints), the MD p-value is wildly inaccurate.

## TOPKAT\_Rat\_Male\_FDA\_None\_vs\_Carcinogen

## Structural Similar Compounds

| Name               | Meclofenamate                                                                       | Diclofenac                                                                          | Phenolphthalein                                                                     |
|--------------------|-------------------------------------------------------------------------------------|-------------------------------------------------------------------------------------|-------------------------------------------------------------------------------------|
| Structure          | 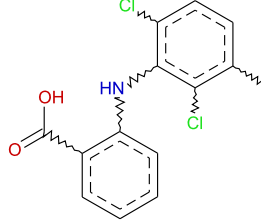 |  |  |
| Actual Endpoint    | Non-Carcinogen                                                                      | Non-Carcinogen                                                                      | Carcinogen                                                                          |
| Predicted Endpoint | Non-Carcinogen                                                                      | Non-Carcinogen                                                                      | Carcinogen                                                                          |
| Distance           | 0.525                                                                               | 0.544                                                                               | 0.592                                                                               |
| Reference          | US FDA (Centre for Drug Eval.& Res./Off. Testing & Res.) Sept. 1997                 | US FDA (Centre for Drug Eval.& Res./Off. Testing & Res.) Sept. 1997                 | US FDA (Centre for Drug Eval.& Res./Off. Testing & Res.) Sept. 1997                 |

## Model Applicability

Unknown features are fingerprint features in the query molecule, but not found or appearing too infrequently in the training set.

1. OPS PC15 out of range. Value: 5.5915. Training min, max, SD, explained variance: -4.0246, 5.5336, 1.388, 0.0180.

## Feature Contribution

## Top features for positive contribution

| Fingerprint | Bit/Smiles | Feature Structure                                                                                                                                     | Score | Carcinogen in training set |
|-------------|------------|-------------------------------------------------------------------------------------------------------------------------------------------------------|-------|----------------------------|
| SCFP_6      | 1651620003 | 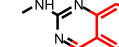<br><chem>[*][c](:[*]):[c]1:[cH]:[cH]:[cH]:[cH]:[c]:1:[*]</chem> | 0.643 | 7 out of 10                |

|  |  |  |  |  |  |
|--|--|--|--|--|--|
|  |  |  |  |  |  |
|--|--|--|--|--|--|

| SCFP_6                                 | -1379673609 | 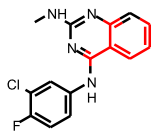<br>[*][c](:[*]):[c]1:[cH]:[cH]:[cH]:[*]:[c]:1:[*] | 0.526  | 11 out of 19               |
|----------------------------------------|-------------|---------------------------------------------------------------------------------------------------------------------------------------|--------|----------------------------|
| SCFP_6                                 | 1655199790  | <br>[*]:n:[c]1:[cH]:[cH]:[cH]:[cH]:[c]:1:[*]       | 0.52   | 5 out of 8                 |
| Top Features for negative contribution |             |                                                                                                                                       |        |                            |
| Fingerprint                            | Bit/Smiles  | Feature Structure                                                                                                                     | Score  | Carcinogen in training set |
| SCFP_6                                 | 18117904    | <br>[*]:[c](:[*])NC                                | -0.578 | 1 out of 8                 |
| SCFP_6                                 | -1545804258 | <br>[*]N[c]1:n:[*]:[c](:[*]):[c](N[*]):n:1       | -0.578 | 1 out of 8                 |
| SCFP_6                                 | 649648475   | <br>[*]N[c](:n:[*]):n:[*]                        | -0.48  | 2 out of 12                |

**7b**

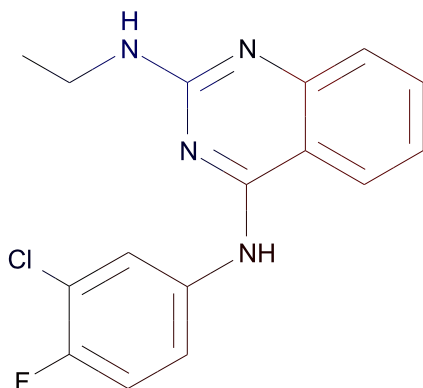
$$\text{C}_{16}\text{H}_{14}\text{ClFN}_4$$

Molecular Weight: 316.76056

|ALogP: 5.025

Rotatable Bonds: 4

Acceptors: 4

Donors: 2

## Model Prediction

**Prediction: Carcinogen**

Probability: 0.399

Enrichment: 1.19

Bayesian Score: 1.42

Mahalanobis Distance: 16

Mahalanobis Distance p-value: 4.53e-009

Prediction: Positive if the Bayesian score is above the estimated best cutoff value from minimizing the false positive and false negative rate.

**Probability:** The estimated probability that the sample is in the positive category. This assumes that the Bayesian score follows a normal distribution and is different from the prediction using a cutoff.

Enrichment: An estimate of enrichment, that is, the increased likelihood (versus random) of this sample being in the category.  
Bayesian Score: The standard Laplacian-modified Bayesian score.

**Mahalanobis Distance:** The Mahalanobis distance (MD) is the distance to the center of the training data. The larger the MD, the less trustworthy the prediction.

Mahalanobis Distance p-value: The p-value gives the fraction of training data with an MD greater than or equal to the one for the given sample, assuming normally distributed data. The smaller the p-value, the less trustworthy the prediction. For highly non-normal X properties (e.g., fingerprints), the MD p-value is wildly inaccurate.

## TOPKAT\_Rat\_Male\_FDA\_None\_vs\_Carcinogen

## Structural Similar Compounds

| Name               | Diclofenac                                                          | Meclofenamate                                                       | Mefloquine                                                          |
|--------------------|---------------------------------------------------------------------|---------------------------------------------------------------------|---------------------------------------------------------------------|
| Structure          |                                                                     |                                                                     |                                                                     |
| Actual Endpoint    | Non-Carcinogen                                                      | Non-Carcinogen                                                      | Non-Carcinogen                                                      |
| Predicted Endpoint | Non-Carcinogen                                                      | Non-Carcinogen                                                      | Non-Carcinogen                                                      |
| Distance           | 0.550                                                               | 0.554                                                               | 0.610                                                               |
| Reference          | US FDA (Centre for Drug Eval.& Res./Off. Testing & Res.) Sept. 1997 | US FDA (Centre for Drug Eval.& Res./Off. Testing & Res.) Sept. 1997 | US FDA (Centre for Drug Eval.& Res./Off. Testing & Res.) Sept. 1997 |

## Model Applicability

Unknown features are fingerprint features in the query molecule, but not found or appearing too infrequently in the training set.

1. All properties and OPS components are within expected ranges.

## Feature Contribution

## Top features for positive contribution

| Fingerprint | Bit/Smiles | Feature Structure                                                                                                                                     | Score | Carcinogen in training set |
|-------------|------------|-------------------------------------------------------------------------------------------------------------------------------------------------------|-------|----------------------------|
| SCFP_6      | 1651620003 | 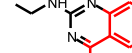<br><chem>[*][c](:[*]):[c]1:[cH]:[cH]:[cH]:[cH]:[c]:1:[*]</chem> | 0.643 | 7 out of 10                |

|                                        |             |                                                                                                                                       |        |                            |
|----------------------------------------|-------------|---------------------------------------------------------------------------------------------------------------------------------------|--------|----------------------------|
| SCFP_6                                 | -1379673609 | 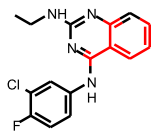<br>[*][c](:[*]):[c]1:[cH]:[cH]:[cH]:[*]:[c]:1:[*] | 0.526  | 11 out of 19               |
| SCFP_6                                 | 1655199790  | <br>[*]:n:[c]1:[cH]:[cH]:[cH]:[cH]:[c]:1:[*]       | 0.52   | 5 out of 8                 |
| Top Features for negative contribution |             |                                                                                                                                       |        |                            |
| Fingerprint                            | Bit/Smiles  | Feature Structure                                                                                                                     | Score  | Carcinogen in training set |
| SCFP_6                                 | -1545804258 | <br>[*]N[c]1:n:[*]:[c](:[*]):[c](N[*]):n:1         | -0.578 | 1 out of 8                 |
| SCFP_6                                 | 18117904    | <br>[*]:[c](:[*])NC                               | -0.578 | 1 out of 8                 |
| SCFP_6                                 | 649648475   | <br>[*]N[c](:n:[*]):n:[*]                        | -0.48  | 2 out of 12                |

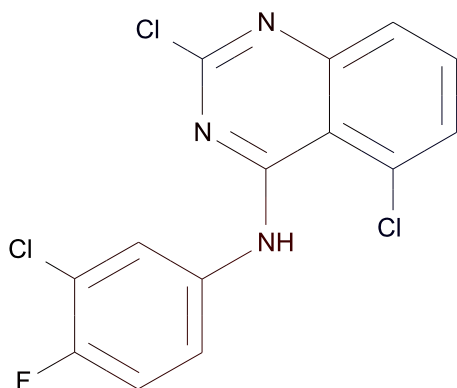

$C_{14}H_7Cl_3FN_3$

Molecular Weight: 342.58288

ALogP: 5.867

Rotatable Bonds: 2

Acceptors: 3

Donors: 1

## Model Prediction

Prediction: Carcinogen

Probability: 0.364

Enrichment: 1.09

Bayesian Score: 0.273

Mahalanobis Distance: 13.5

Mahalanobis Distance p-value: 0.000258

Prediction: Positive if the Bayesian score is above the estimated best cutoff value from minimizing the false positive and false negative rate.

Probability: The estimated probability that the sample is in the positive category. This assumes that the Bayesian score follows a normal distribution and is different from the prediction using a cutoff.

Enrichment: An estimate of enrichment, that is, the increased likelihood (versus random) of this sample being in the category.

Bayesian Score: The standard Laplacian-modified Bayesian score.

Mahalanobis Distance: The Mahalanobis distance (MD) is the distance to the center of the training data. The larger the MD, the less trustworthy the prediction.

Mahalanobis Distance p-value: The p-value gives the fraction of training data with an MD greater than or equal to the one for the given sample, assuming normally distributed data. The smaller the p-value, the less trustworthy the prediction. For highly non-normal X properties (e.g., fingerprints), the MD p-value is wildly inaccurate.

## Structural Similar Compounds

| Name               | Mestranol                                                           | Loratidine                                                          | Meclofenamate                                                       |
|--------------------|---------------------------------------------------------------------|---------------------------------------------------------------------|---------------------------------------------------------------------|
| Structure          |                                                                     |                                                                     |                                                                     |
| Actual Endpoint    | Carcinogen                                                          | Non-Carcinogen                                                      | Non-Carcinogen                                                      |
| Predicted Endpoint | Carcinogen                                                          | Non-Carcinogen                                                      | Non-Carcinogen                                                      |
| Distance           | 0.642                                                               | 0.642                                                               | 0.642                                                               |
| Reference          | US FDA (Centre for Drug Eval.& Res./Off. Testing & Res.) Sept. 1997 | US FDA (Centre for Drug Eval.& Res./Off. Testing & Res.) Sept. 1997 | US FDA (Centre for Drug Eval.& Res./Off. Testing & Res.) Sept. 1997 |

## Model Applicability

Unknown features are fingerprint features in the query molecule, but not found or appearing too infrequently in the training set.

1. All properties and OPS components are within expected ranges.

## Feature Contribution

### Top features for positive contribution

| Fingerprint | Bit/Smiles | Feature Structure                                            | Score | Carcinogen in training set |
|-------------|------------|--------------------------------------------------------------|-------|----------------------------|
| SCFP_6      | -300914917 | <br>[*][c]1:[*]:[cH]:[cH]<br>:[c](N[c](:[*]):[*])<br>:[cH]:1 | 0.415 | 1 out of 1                 |

|                                        |             |                                                                                                                                            |        |                            |
|----------------------------------------|-------------|--------------------------------------------------------------------------------------------------------------------------------------------|--------|----------------------------|
| SCFP_6                                 | 1334878018  | 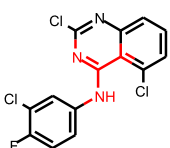<br><chem>[*]N[c](:n:[*]):[c](:[*]):[*]</chem>          | 0.333  | 8 out of 17                |
| SCFP_6                                 | -1380909229 | <br><chem>[*]N[c]1:[cH]:[*]:[c]([*]):[cH]:[cH]:1</chem> | 0.287  | 17 out of 39               |
| Top Features for negative contribution |             |                                                                                                                                            |        |                            |
| Fingerprint                            | Bit/Smiles  | Feature Structure                                                                                                                          | Score  | Carcinogen in training set |
| SCFP_6                                 | -52074512   | <br><chem>[*]:[c](:[*])Cl</chem>                        | -0.315 | 14 out of 61               |
| SCFP_6                                 | -601571304  | <br><chem>[*][c](:[*]):[c](Cl):[cH]:[*]</chem>         | -0.3   | 14 out of 60               |
| SCFP_6                                 | -1378360678 | <br><chem>[*]:[c]1:[*]:[cH]:[cH]:[cH]:[c]:1Cl</chem>  | -0.289 | 12 out of 51               |

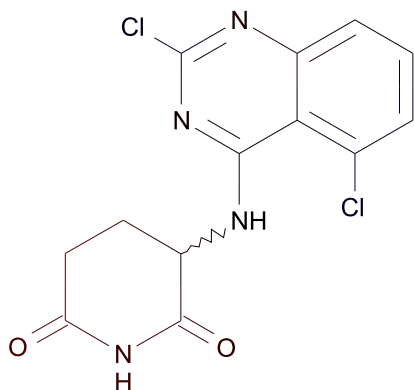

$C_{13}H_{10}Cl_2N_4O_2$

Molecular Weight: 325.15009

ALogP: 2.49

Rotatable Bonds: 2

Acceptors: 5

Donors: 2

## Model Prediction

Prediction: Carcinogen

Probability: 0.366

Enrichment: 1.1

Bayesian Score: 0.331

Mahalanobis Distance: 14.1

Mahalanobis Distance p-value: 3.26e-005

Prediction: Positive if the Bayesian score is above the estimated best cutoff value from minimizing the false positive and false negative rate.

Probability: The estimated probability that the sample is in the positive category. This assumes that the Bayesian score follows a normal distribution and is different from the prediction using a cutoff.

Enrichment: An estimate of enrichment, that is, the increased likelihood (versus random) of this sample being in the category.

Bayesian Score: The standard Laplacian-modified Bayesian score.

Mahalanobis Distance: The Mahalanobis distance (MD) is the distance to the center of the training data. The larger the MD, the less trustworthy the prediction.

Mahalanobis Distance p-value: The p-value gives the fraction of training data with an MD greater than or equal to the one for the given sample, assuming normally distributed data. The smaller the p-value, the less trustworthy the prediction. For highly non-normal X properties (e.g., fingerprints), the MD p-value is wildly inaccurate.

## Structural Similar Compounds

| Name               | Metolazone                                                          | Indapamide                                                          | Tolazamide                                                          |
|--------------------|---------------------------------------------------------------------|---------------------------------------------------------------------|---------------------------------------------------------------------|
| Structure          |                                                                     |                                                                     |                                                                     |
| Actual Endpoint    | Non-Carcinogen                                                      | Non-Carcinogen                                                      | Non-Carcinogen                                                      |
| Predicted Endpoint | Non-Carcinogen                                                      | Non-Carcinogen                                                      | Non-Carcinogen                                                      |
| Distance           | 0.548                                                               | 0.566                                                               | 0.573                                                               |
| Reference          | US FDA (Centre for Drug Eval.& Res./Off. Testing & Res.) Sept. 1997 | US FDA (Centre for Drug Eval.& Res./Off. Testing & Res.) Sept. 1997 | US FDA (Centre for Drug Eval.& Res./Off. Testing & Res.) Sept. 1997 |

## Model Applicability

Unknown features are fingerprint features in the query molecule, but not found or appearing too infrequently in the training set.

1. All properties and OPS components are within expected ranges.

## Feature Contribution

### Top features for positive contribution

| Fingerprint | Bit/Smiles  | Feature Structure                  | Score | Carcinogen in training set |
|-------------|-------------|------------------------------------|-------|----------------------------|
| SCFP_6      | -1533214013 | <br><chem>[*]C1CCC(=O)NC1=O</chem> | 0.415 | 1 out of 1                 |

| SCFP_6                                 | 395945879  | 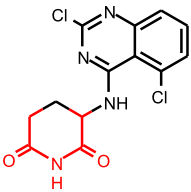<br><chem>[*]C1[*]CC(=O)NC1=O</chem>             | 0.415  | 1 out of 1                 |
|----------------------------------------|------------|-------------------------------------------------------------------------------------------------------------------------------------|--------|----------------------------|
| SCFP_6                                 | 345243876  | <br><chem>[*]=C1[*]CCC(=O)N1</chem>              | 0.415  | 1 out of 1                 |
| Top Features for negative contribution |            |                                                                                                                                     |        |                            |
| Fingerprint                            | Bit/Smiles | Feature Structure                                                                                                                   | Score  | Carcinogen in training set |
| SCFP_6                                 | 18117904   | <br><chem>[*]:[c](:[*])NC</chem>                 | -0.578 | 1 out of 8                 |
| SCFP_6                                 | -52074512  | <br><chem>[*]:[c](:[*])Cl</chem>                | -0.315 | 14 out of 61               |
| SCFP_6                                 | -601571304 | <br><chem>[*][c](:[*]):[c](Cl):[cH]:[*]</chem> | -0.3   | 14 out of 60               |

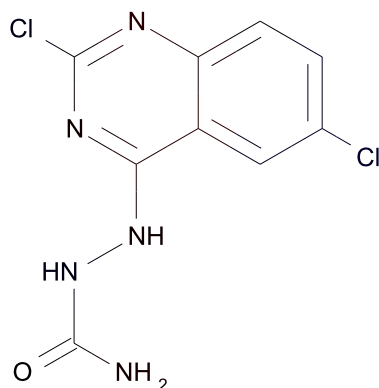

$C_9H_7Cl_2N_5O$

Molecular Weight: 272.09078

ALogP: 2.379

Rotatable Bonds: 2

Acceptors: 4

Donors: 3

## Model Prediction

Prediction: Non-Carcinogen

Probability: 0.348

Enrichment: 1.04

Bayesian Score: -0.291

Mahalanobis Distance: 14.3

Mahalanobis Distance p-value: 1.37e-005

Prediction: Positive if the Bayesian score is above the estimated best cutoff value from minimizing the false positive and false negative rate.

Probability: The estimated probability that the sample is in the positive category. This assumes that the Bayesian score follows a normal distribution and is different from the prediction using a cutoff.

Enrichment: An estimate of enrichment, that is, the increased likelihood (versus random) of this sample being in the category.

Bayesian Score: The standard Laplacian-modified Bayesian score.

Mahalanobis Distance: The Mahalanobis distance (MD) is the distance to the center of the training data. The larger the MD, the less trustworthy the prediction.

Mahalanobis Distance p-value: The p-value gives the fraction of training data with an MD greater than or equal to the one for the given sample, assuming normally distributed data. The smaller the p-value, the less trustworthy the prediction. For highly non-normal X properties (e.g., fingerprints), the MD p-value is wildly inaccurate.

## Structural Similar Compounds

| Name               | Pyrimethamine                                                       | Lamotrigine                                                         | Guanfacine                                                          |
|--------------------|---------------------------------------------------------------------|---------------------------------------------------------------------|---------------------------------------------------------------------|
| Structure          |                                                                     |                                                                     |                                                                     |
| Actual Endpoint    | Non-Carcinogen                                                      | Non-Carcinogen                                                      | Non-Carcinogen                                                      |
| Predicted Endpoint | Non-Carcinogen                                                      | Non-Carcinogen                                                      | Non-Carcinogen                                                      |
| Distance           | 0.603                                                               | 0.608                                                               | 0.622                                                               |
| Reference          | US FDA (Centre for Drug Eval.& Res./Off. Testing & Res.) Sept. 1997 | US FDA (Centre for Drug Eval.& Res./Off. Testing & Res.) Sept. 1997 | US FDA (Centre for Drug Eval.& Res./Off. Testing & Res.) Sept. 1997 |

## Model Applicability

Unknown features are fingerprint features in the query molecule, but not found or appearing too infrequently in the training set.

1. All properties and OPS components are within expected ranges.

## Feature Contribution

### Top features for positive contribution

| Fingerprint | Bit/Smiles  | Feature Structure | Score | Carcinogen in training set |
|-------------|-------------|-------------------|-------|----------------------------|
| SCFP_6      | -1357949052 | <br>[*]C(=[*])N   | 0.494 | 8 out of 14                |

|                                        |             |                                                                                                                                               |        |                            |
|----------------------------------------|-------------|-----------------------------------------------------------------------------------------------------------------------------------------------|--------|----------------------------|
| SCFP_6                                 | 1334878018  | 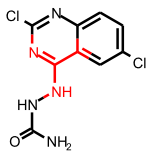<br><chem>[*]N[c](:n:[*]):[c](:[*]):[*]</chem>             | 0.333  | 8 out of 17                |
| SCFP_6                                 | 112346096   | <br><chem>[*][c](:[*]):[c](:[cH]:[*]):[c](:[*]):[*]</chem> | 0.276  | 13 out of 30               |
| Top Features for negative contribution |             |                                                                                                                                               |        |                            |
| Fingerprint                            | Bit/Smiles  | Feature Structure                                                                                                                             | Score  | Carcinogen in training set |
| SCFP_6                                 | -52074512   | <br><chem>[*]:[c](:[*])Cl</chem>                           | -0.315 | 14 out of 61               |
| SCFP_6                                 | -601571304  | <br><chem>[*][c](:[*]):[c](Cl):[cH]:[*]</chem>            | -0.3   | 14 out of 60               |
| SCFP_6                                 | -1378360678 | <br><chem>[*]:[c]1:[*]:[cH]:[cH]:[cH]:[c]:1Cl</chem>     | -0.289 | 12 out of 51               |

**13b**

## TOPKAT\_Rat\_Male\_FDA\_None\_vs\_Carcinogen

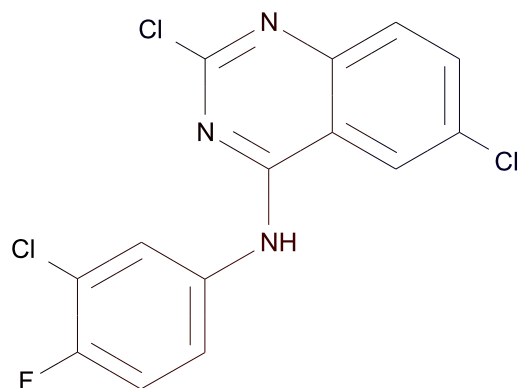
$$\text{C}_{14}\text{H}_7\text{Cl}_3\text{FN}_3$$

Molecular Weight: 342.58288

|ALogP: 5.867

Rotatable Bonds: 2

Acceptors: 3

Donors: 1

## Model Prediction

**Prediction: Carcinogen**

Probability: 0.365

Enrichment: 1.09

Bayesian Score: 0.284

Mahalanobis Distance: 13.6

Mahalanobis Distance p-value: 0.000236

Prediction: Positive if the Bayesian score is above the estimated best cutoff value from minimizing the false positive and false negative rate.

Probability: The estimated probability that the sample is in the positive category. This assumes that the Bayesian score follows a normal distribution and is different from the prediction using a cutoff.

Enrichment: An estimate of enrichment, that is, the increased likelihood (versus random) of this sample being in the category.  
Bayesian Score: The standard Laplacian-modified Bayesian score.

**Mahalanobis Distance:** The Mahalanobis distance (MD) is the distance to the center of the training data. The larger the MD, the less trustworthy the prediction.

Mahalanobis Distance p-value: The p-value gives the fraction of training data with an MD greater than or equal to the one for the given sample, assuming normally distributed data. The smaller the p-value, the less trustworthy the prediction. For highly non-normal X properties (e.g., fingerprints), the MD p-value is wildly inaccurate.

## Structural Similar Compounds

| Name               | Loratidine                                                                          | Mestranol                                                                           | Meclofenamate                                                                       |
|--------------------|-------------------------------------------------------------------------------------|-------------------------------------------------------------------------------------|-------------------------------------------------------------------------------------|
| Structure          | 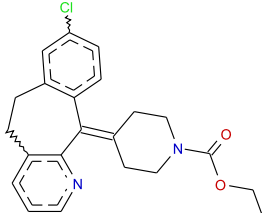 |  |  |
| Actual Endpoint    | Non-Carcinogen                                                                      | Carcinogen                                                                          | Non-Carcinogen                                                                      |
| Predicted Endpoint | Non-Carcinogen                                                                      | Carcinogen                                                                          | Non-Carcinogen                                                                      |
| Distance           | 0.637                                                                               | 0.642                                                                               | 0.649                                                                               |
| Reference          | US FDA (Centre for Drug Eval.& Res./Off. Testing & Res.) Sept. 1997                 | US FDA (Centre for Drug Eval.& Res./Off. Testing & Res.) Sept. 1997                 | US FDA (Centre for Drug Eval.& Res./Off. Testing & Res.) Sept. 1997                 |

## Model Applicability

Unknown features are fingerprint features in the query molecule, but not found or appearing too infrequently in the training set.

1. All properties and OPS components are within expected ranges.

## Feature Contribution

### Top features for positive contribution

| Fingerprint | Bit/Smiles | Feature Structure                                                                                                                                      | Score | Carcinogen in training set |
|-------------|------------|--------------------------------------------------------------------------------------------------------------------------------------------------------|-------|----------------------------|
| SCFP_6      | -300914917 | 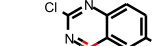<br><chem>[*][c]1:[*]:[cH]:[cH]:[c](N[c](:[*]):[*]):[cH]:1</chem> | 0.415 | 1 out of 1                 |

|                                        |             |                                                                                                                                            |        |                            |
|----------------------------------------|-------------|--------------------------------------------------------------------------------------------------------------------------------------------|--------|----------------------------|
| SCFP_6                                 | 1334878018  | 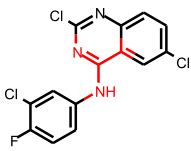<br><chem>[*]N[c](:n:[*]):[c](:[*]):[*]</chem>          | 0.333  | 8 out of 17                |
| SCFP_6                                 | -1380909229 | <br><chem>[*]N[c]1:[cH]:[*]:[c]([*]):[cH]:[cH]:1</chem> | 0.287  | 17 out of 39               |
| Top Features for negative contribution |             |                                                                                                                                            |        |                            |
| Fingerprint                            | Bit/Smiles  | Feature Structure                                                                                                                          | Score  | Carcinogen in training set |
| SCFP_6                                 | -52074512   | <br><chem>[*]:[c](:[*])Cl</chem>                        | -0.315 | 14 out of 61               |
| SCFP_6                                 | -601571304  | <br><chem>[*][c](:[*]):[c](Cl):[cH]:[*]</chem>         | -0.3   | 14 out of 60               |
| SCFP_6                                 | -1378360678 | <br><chem>[*]:[c]1:[*]:[cH]:[cH]:[cH]:[c]:1Cl</chem>  | -0.289 | 12 out of 51               |

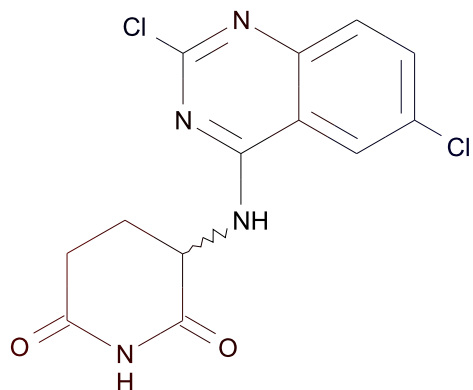

$C_{13}H_{10}Cl_2N_4O_2$

Molecular Weight: 325.15009

ALogP: 2.49

Rotatable Bonds: 2

Acceptors: 5

Donors: 2

## Model Prediction

Prediction: Carcinogen

Probability: 0.366

Enrichment: 1.1

Bayesian Score: 0.343

Mahalanobis Distance: 14.4

Mahalanobis Distance p-value: 9.01e-006

Prediction: Positive if the Bayesian score is above the estimated best cutoff value from minimizing the false positive and false negative rate.

Probability: The estimated probability that the sample is in the positive category. This assumes that the Bayesian score follows a normal distribution and is different from the prediction using a cutoff.

Enrichment: An estimate of enrichment, that is, the increased likelihood (versus random) of this sample being in the category.

Bayesian Score: The standard Laplacian-modified Bayesian score.

Mahalanobis Distance: The Mahalanobis distance (MD) is the distance to the center of the training data. The larger the MD, the less trustworthy the prediction.

Mahalanobis Distance p-value: The p-value gives the fraction of training data with an MD greater than or equal to the one for the given sample, assuming normally distributed data. The smaller the p-value, the less trustworthy the prediction. For highly non-normal X properties (e.g., fingerprints), the MD p-value is wildly inaccurate.

## Structural Similar Compounds

| Name               | Metolazone                                                          | Indapamide                                                          | Tolazamide                                                          |
|--------------------|---------------------------------------------------------------------|---------------------------------------------------------------------|---------------------------------------------------------------------|
| Structure          |                                                                     |                                                                     |                                                                     |
| Actual Endpoint    | Non-Carcinogen                                                      | Non-Carcinogen                                                      | Non-Carcinogen                                                      |
| Predicted Endpoint | Non-Carcinogen                                                      | Non-Carcinogen                                                      | Non-Carcinogen                                                      |
| Distance           | 0.554                                                               | 0.572                                                               | 0.573                                                               |
| Reference          | US FDA (Centre for Drug Eval.& Res./Off. Testing & Res.) Sept. 1997 | US FDA (Centre for Drug Eval.& Res./Off. Testing & Res.) Sept. 1997 | US FDA (Centre for Drug Eval.& Res./Off. Testing & Res.) Sept. 1997 |

## Model Applicability

Unknown features are fingerprint features in the query molecule, but not found or appearing too infrequently in the training set.

1. All properties and OPS components are within expected ranges.

## Feature Contribution

### Top features for positive contribution

| Fingerprint | Bit/Smiles | Feature Structure                   | Score | Carcinogen in training set |
|-------------|------------|-------------------------------------|-------|----------------------------|
| SCFP_6      | 345243876  | <br><chem>[*]=C1[*]CCC(=O)N1</chem> | 0.415 | 1 out of 1                 |

| SCFP_6                                 | 395945879   | 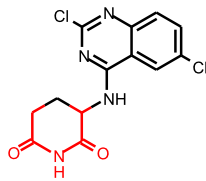<br><chem>[*]C1[*]CC(=O)NC1=O</chem>             | 0.415  | 1 out of 1                 |
|----------------------------------------|-------------|-------------------------------------------------------------------------------------------------------------------------------------|--------|----------------------------|
| SCFP_6                                 | -1533214013 | <br><chem>[*]C1CCC(=O)NC1=O</chem>               | 0.415  | 1 out of 1                 |
| Top Features for negative contribution |             |                                                                                                                                     |        |                            |
| Fingerprint                            | Bit/Smiles  | Feature Structure                                                                                                                   | Score  | Carcinogen in training set |
| SCFP_6                                 | 18117904    | <br><chem>[*]:[c](:[*])NC</chem>                 | -0.578 | 1 out of 8                 |
| SCFP_6                                 | -52074512   | <br><chem>[*]:[c](:[*])Cl</chem>                | -0.315 | 14 out of 61               |
| SCFP_6                                 | -601571304  | <br><chem>[*][c](:[*]):[c](Cl):[cH]:[*]</chem> | -0.3   | 14 out of 60               |

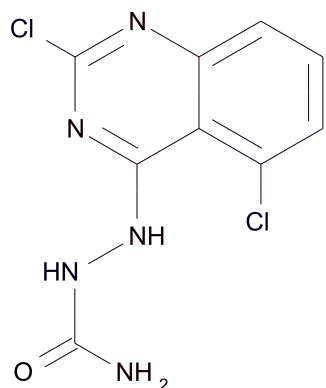

$C_9H_7Cl_2N_5O$

Molecular Weight: 272.09077

ALogP: 2.379

Rotatable Bonds: 2

Acceptors: 4

Donors: 3

## Model Prediction

Prediction: Non-Carcinogen

Probability: 0.348

Enrichment: 1.04

Bayesian Score: -0.303

Mahalanobis Distance: 13.8

Mahalanobis Distance p-value: 9.34e-005

Prediction: Positive if the Bayesian score is above the estimated best cutoff value from minimizing the false positive and false negative rate.

Probability: The estimated probability that the sample is in the positive category. This assumes that the Bayesian score follows a normal distribution and is different from the prediction using a cutoff.

Enrichment: An estimate of enrichment, that is, the increased likelihood (versus random) of this sample being in the category.

Bayesian Score: The standard Laplacian-modified Bayesian score.

Mahalanobis Distance: The Mahalanobis distance (MD) is the distance to the center of the training data. The larger the MD, the less trustworthy the prediction.

Mahalanobis Distance p-value: The p-value gives the fraction of training data with an MD greater than or equal to the one for the given sample, assuming normally distributed data. The smaller the p-value, the less trustworthy the prediction. For highly non-normal X properties (e.g., fingerprints), the MD p-value is wildly inaccurate.

## Structural Similar Compounds

| Name               | Lamotrigine                                                         | Pyrimethamine                                                       | Guanfacine                                                          |
|--------------------|---------------------------------------------------------------------|---------------------------------------------------------------------|---------------------------------------------------------------------|
| Structure          |                                                                     |                                                                     |                                                                     |
| Actual Endpoint    | Non-Carcinogen                                                      | Non-Carcinogen                                                      | Non-Carcinogen                                                      |
| Predicted Endpoint | Non-Carcinogen                                                      | Non-Carcinogen                                                      | Non-Carcinogen                                                      |
| Distance           | 0.600                                                               | 0.611                                                               | 0.613                                                               |
| Reference          | US FDA (Centre for Drug Eval.& Res./Off. Testing & Res.) Sept. 1997 | US FDA (Centre for Drug Eval.& Res./Off. Testing & Res.) Sept. 1997 | US FDA (Centre for Drug Eval.& Res./Off. Testing & Res.) Sept. 1997 |

## Model Applicability

Unknown features are fingerprint features in the query molecule, but not found or appearing too infrequently in the training set.

1. All properties and OPS components are within expected ranges.

## Feature Contribution

### Top features for positive contribution

| Fingerprint | Bit/Smiles  | Feature Structure            | Score | Carcinogen in training set |
|-------------|-------------|------------------------------|-------|----------------------------|
| SCFP_6      | -1357949052 | <br><chem>[*]C(=[*])N</chem> | 0.494 | 8 out of 14                |

|                                        |             |                                                                                                                                               |        |                            |
|----------------------------------------|-------------|-----------------------------------------------------------------------------------------------------------------------------------------------|--------|----------------------------|
| SCFP_6                                 | 1334878018  | 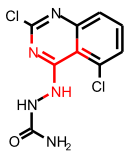<br><chem>[*]N[c](:n:[*]):[c](:[*]):[*]</chem>             | 0.333  | 8 out of 17                |
| SCFP_6                                 | 112346096   | <br><chem>[*][c](:[*]):[c](:[cH]:[*]):[c](:[*]):[*]</chem> | 0.276  | 13 out of 30               |
| Top Features for negative contribution |             |                                                                                                                                               |        |                            |
| Fingerprint                            | Bit/Smiles  | Feature Structure                                                                                                                             | Score  | Carcinogen in training set |
| SCFP_6                                 | -52074512   | <br><chem>[*]:[c](:[*])Cl</chem>                           | -0.315 | 14 out of 61               |
| SCFP_6                                 | -601571304  | <br><chem>[*][c](:[*]):[c](Cl):[cH]:[*]</chem>            | -0.3   | 14 out of 60               |
| SCFP_6                                 | -1378360678 | <br><chem>[*]:[c]1:[*]:[cH]:[cH]:[cH]:[c]:1Cl</chem>     | -0.289 | 12 out of 51               |

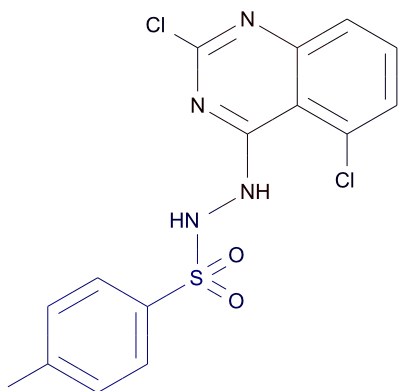

$C_{15}H_{12}Cl_2N_4O_2S$

Molecular Weight: 383.25237

ALogP: 4.443

Rotatable Bonds: 4

Acceptors: 5

Donors: 2

## Model Prediction

Prediction: Non-Carcinogen

Probability: 0.284

Enrichment: 0.849

Bayesian Score: -2.82

Mahalanobis Distance: 14.5

Mahalanobis Distance p-value: 5.33e-006

Prediction: Positive if the Bayesian score is above the estimated best cutoff value from minimizing the false positive and false negative rate.

Probability: The estimated probability that the sample is in the positive category. This assumes that the Bayesian score follows a normal distribution and is different from the prediction using a cutoff.

Enrichment: An estimate of enrichment, that is, the increased likelihood (versus random) of this sample being in the category.

Bayesian Score: The standard Laplacian-modified Bayesian score.

Mahalanobis Distance: The Mahalanobis distance (MD) is the distance to the center of the training data. The larger the MD, the less trustworthy the prediction.

Mahalanobis Distance p-value: The p-value gives the fraction of training data with an MD greater than or equal to the one for the given sample, assuming normally distributed data. The smaller the p-value, the less trustworthy the prediction. For highly non-normal X properties (e.g., fingerprints), the MD p-value is wildly inaccurate.

## Structural Similar Compounds

| Name               | Indapamide                                                          | Indomethacin                                                        | Torsemide                                                           |
|--------------------|---------------------------------------------------------------------|---------------------------------------------------------------------|---------------------------------------------------------------------|
| Structure          |                                                                     |                                                                     |                                                                     |
| Actual Endpoint    | Non-Carcinogen                                                      | Non-Carcinogen                                                      | Carcinogen                                                          |
| Predicted Endpoint | Non-Carcinogen                                                      | Non-Carcinogen                                                      | Carcinogen                                                          |
| Distance           | 0.617                                                               | 0.628                                                               | 0.630                                                               |
| Reference          | US FDA (Centre for Drug Eval.& Res./Off. Testing & Res.) Sept. 1997 | US FDA (Centre for Drug Eval.& Res./Off. Testing & Res.) Sept. 1997 | US FDA (Centre for Drug Eval.& Res./Off. Testing & Res.) Sept. 1997 |

## Model Applicability

Unknown features are fingerprint features in the query molecule, but not found or appearing too infrequently in the training set.

1. All properties and OPS components are within expected ranges.

## Feature Contribution

### Top features for positive contribution

| Fingerprint | Bit/Smiles | Feature Structure                 | Score | Carcinogen in training set |
|-------------|------------|-----------------------------------|-------|----------------------------|
| SCFP_6      | 1334878018 | <br>[*]N[c](:n:[*]):[c](:[*]):[*] | 0.333 | 8 out of 17                |

|                                        |            |                                                                                                                                                        |        |                            |
|----------------------------------------|------------|--------------------------------------------------------------------------------------------------------------------------------------------------------|--------|----------------------------|
| SCFP_6                                 | 136686699  | 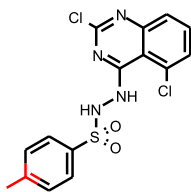<br><chem>[*]:[c](:[*])C</chem>                                      | 0.287  | 17 out of 39               |
| SCFP_6                                 | 112346096  | <br><chem>[*][c](:[*]):[c](:[cH]:[*]):[c](:[*]):[*]</chem>          | 0.276  | 13 out of 30               |
| Top Features for negative contribution |            |                                                                                                                                                        |        |                            |
| Fingerprint                            | Bit/Smiles | Feature Structure                                                                                                                                      | Score  | Carcinogen in training set |
| SCFP_6                                 | 1892882306 | <br><chem>[*]NS(=O)(=O)[c]1:[cH]:[cH]:[c](C):[cH]:[cH]:1</chem>     | -0.957 | 0 out of 5                 |
| SCFP_6                                 | 2054891299 | <br><chem>[*]S(=[*])(=[*])[c]1:[cH]:[cH]:[c](C):[cH]:[cH]:1</chem> | -0.496 | 0 out of 2                 |
| SCFP_6                                 | 795925860  | <br><chem>[*][c]1:[cH]:[cH]:[c](C):[cH]:[cH]:1</chem>             | -0.38  | 1 out of 6                 |

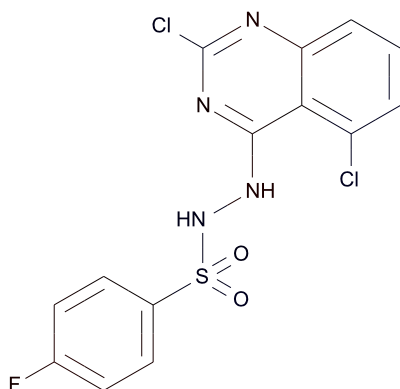

$C_{14}H_9Cl_2FN_4O_2S$

Molecular Weight: 387.21626

ALogP: 4.162

Rotatable Bonds: 4

Acceptors: 5

Donors: 2

## Model Prediction

Prediction: Non-Carcinogen

Probability: 0.347

Enrichment: 1.04

Bayesian Score: -0.338

Mahalanobis Distance: 15.5

Mahalanobis Distance p-value: 7.06e-008

Prediction: Positive if the Bayesian score is above the estimated best cutoff value from minimizing the false positive and false negative rate.

Probability: The estimated probability that the sample is in the positive category. This assumes that the Bayesian score follows a normal distribution and is different from the prediction using a cutoff.

Enrichment: An estimate of enrichment, that is, the increased likelihood (versus random) of this sample being in the category.

Bayesian Score: The standard Laplacian-modified Bayesian score.

Mahalanobis Distance: The Mahalanobis distance (MD) is the distance to the center of the training data. The larger the MD, the less trustworthy the prediction.

Mahalanobis Distance p-value: The p-value gives the fraction of training data with an MD greater than or equal to the one for the given sample, assuming normally distributed data. The smaller the p-value, the less trustworthy the prediction. For highly non-normal X properties (e.g., fingerprints), the MD p-value is wildly inaccurate.

## Structural Similar Compounds

| Name               | Bicalutamide                                                        | Indapamide                                                          | Niclosamide                                                         |
|--------------------|---------------------------------------------------------------------|---------------------------------------------------------------------|---------------------------------------------------------------------|
| Structure          |                                                                     |                                                                     |                                                                     |
| Actual Endpoint    | Carcinogen                                                          | Non-Carcinogen                                                      | Non-Carcinogen                                                      |
| Predicted Endpoint | Carcinogen                                                          | Non-Carcinogen                                                      | Non-Carcinogen                                                      |
| Distance           | 0.612                                                               | 0.613                                                               | 0.621                                                               |
| Reference          | US FDA (Centre for Drug Eval.& Res./Off. Testing & Res.) Sept. 1997 | US FDA (Centre for Drug Eval.& Res./Off. Testing & Res.) Sept. 1997 | US FDA (Centre for Drug Eval.& Res./Off. Testing & Res.) Sept. 1997 |

## Model Applicability

Unknown features are fingerprint features in the query molecule, but not found or appearing too infrequently in the training set.

- OPS PC1 out of range. Value: -5.807. Training min, max, SD, explained variance: -5.694, 8.348, 2.949, 0.0811.

## Feature Contribution

| Top features for positive contribution |            |                                                           |       |                            |
|----------------------------------------|------------|-----------------------------------------------------------|-------|----------------------------|
| Fingerprint                            | Bit/Smiles | Feature Structure                                         | Score | Carcinogen in training set |
| SCFP_6                                 | 2144224020 | <br>[*]S(=[*])(=[*])[c]1:<br>[cH]:[cH]:[c](F):[cH]:[cH]:1 | 0.415 | 1 out of 1                 |

|                                        |             |                                                                                                                                               |        |                            |
|----------------------------------------|-------------|-----------------------------------------------------------------------------------------------------------------------------------------------|--------|----------------------------|
| SCFP_6                                 | 1334878018  | 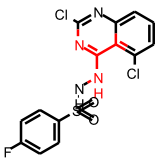<br><chem>[*]N[c](:n:[*]):[c](:[*]):[*]</chem>             | 0.333  | 8 out of 17                |
| SCFP_6                                 | 112346096   | <br><chem>[*][c](:[*]):[c](:[cH]:[*]):[c](:[*]):[*]</chem> | 0.276  | 13 out of 30               |
| Top Features for negative contribution |             |                                                                                                                                               |        |                            |
| Fingerprint                            | Bit/Smiles  | Feature Structure                                                                                                                             | Score  | Carcinogen in training set |
| SCFP_6                                 | -52074512   | <br><chem>[*]:[c](:[*])Cl</chem>                           | -0.315 | 14 out of 61               |
| SCFP_6                                 | -601571304  | <br><chem>[*][c](:[*]):[c](Cl):[cH]:[*]</chem>            | -0.3   | 14 out of 60               |
| SCFP_6                                 | -1378360678 | <br><chem>[*]:[c]1:[*]:[cH]:[cH]:[cH]:[c]:1Cl</chem>     | -0.289 | 12 out of 51               |

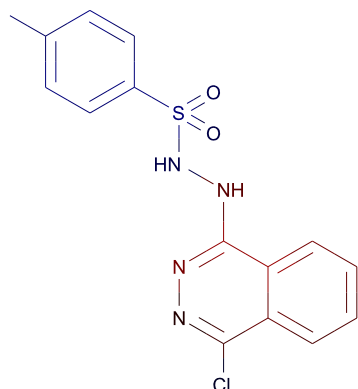
$$\text{C}_{15}\text{H}_{13}\text{ClN}_4\text{O}_2\text{S}$$

Molecular Weight: 348.80731

|ALogP: 3.529

Rotatable Bonds: 4

Acceptors: 5

Donors: 2

## Model Prediction

**Prediction: Non-Carcinogen**

Probability: 0.349

Enrichment: 1.04

Bayesian Score: -0.258

Mahalanobis Distance: 25.5

Mahalanobis Distance p-value: 8.64e-034

Prediction: Positive if the Bayesian score is above the estimated best cutoff value from minimizing the false positive and false negative rate.

**Probability:** The estimated probability that the sample is in the positive category. This assumes that the Bayesian score follows a normal distribution and is different from the prediction using a cutoff.

Enrichment: An estimate of enrichment, that is, the increased likelihood (versus random) of this sample being in the category.  
Bayesian Score: The standard Laplacian-modified Bayesian score.

**Mahalanobis Distance:** The Mahalanobis distance (MD) is the distance to the center of the training data. The larger the MD, the less trustworthy the prediction.

Mahalanobis Distance p-value: The p-value gives the fraction of training data with an MD greater than or equal to the one for the given sample, assuming normally distributed data. The smaller the p-value, the less trustworthy the prediction. For highly non-normal X properties (e.g., fingerprints), the MD p-value is wildly inaccurate.

## Structural Similar Compounds

| Name               | Indapamide                                                                          | Tolazamide                                                                          | Nicosamide                                                                          |
|--------------------|-------------------------------------------------------------------------------------|-------------------------------------------------------------------------------------|-------------------------------------------------------------------------------------|
| Structure          | 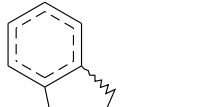 |  |  |
| Actual Endpoint    | Non-Carcinogen                                                                      | Non-Carcinogen                                                                      | Non-Carcinogen                                                                      |
| Predicted Endpoint | Non-Carcinogen                                                                      | Non-Carcinogen                                                                      | Non-Carcinogen                                                                      |
| Distance           | 0.559                                                                               | 0.569                                                                               | 0.581                                                                               |
| Reference          | US FDA (Centre for Drug Eval.& Res./Off. Testing & Res.) Sept. 1997                 | US FDA (Centre for Drug Eval.& Res./Off. Testing & Res.) Sept. 1997                 | US FDA (Centre for Drug Eval.& Res./Off. Testing & Res.) Sept. 1997                 |

## Model Applicability

Unknown features are fingerprint features in the query molecule, but not found or appearing too infrequently in the training set.

1. All properties and OPS components are within expected ranges.

## Feature Contribution

| Top features for positive contribution |            |                                                                                                                                                             |       |                            |
|----------------------------------------|------------|-------------------------------------------------------------------------------------------------------------------------------------------------------------|-------|----------------------------|
| Fingerprint                            | Bit/Smiles | Feature Structure                                                                                                                                           | Score | Carcinogen in training set |
| SCFP_6                                 | 1651620003 | 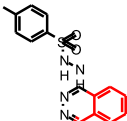<br><chem>[*][c](:[*]):[c]([H]:[cH]:[cH]:[cH]:[cH])[n+](=O)[n-]</chem> | 0.643 | 7 out of 10                |

| SCFP_6                                 | 149212520   | 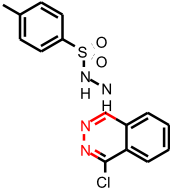<br><chem>[*][c](:[*]):n:n:[*]</chem>                               | 0.543  | 9 out of 15                |
|----------------------------------------|-------------|--------------------------------------------------------------------------------------------------------------------------------------------------------|--------|----------------------------|
| SCFP_6                                 | -1379673609 | <br><chem>[*][c](:[*]):[c]1:[cH]:[cH]:[cH]:[*]:[c]:1:[*]</chem>     | 0.526  | 11 out of 19               |
| Top Features for negative contribution |             |                                                                                                                                                        |        |                            |
| Fingerprint                            | Bit/Smiles  | Feature Structure                                                                                                                                      | Score  | Carcinogen in training set |
| SCFP_6                                 | 1892882306  | <br><chem>[*]NS(=O)(=O)[c]1:[cH]:[cH]:[c](C):[cH]:[cH]:1</chem>     | -0.957 | 0 out of 5                 |
| SCFP_6                                 | 2054891299  | <br><chem>[*]S(=[*])(=[*])[c]1:[cH]:[cH]:[c](C):[cH]:[cH]:1</chem> | -0.496 | 0 out of 2                 |
| SCFP_6                                 | 795925860   | <br><chem>[*][c]1:[cH]:[cH]:[c](C):[cH]:[cH]:1</chem>             | -0.38  | 1 out of 6                 |

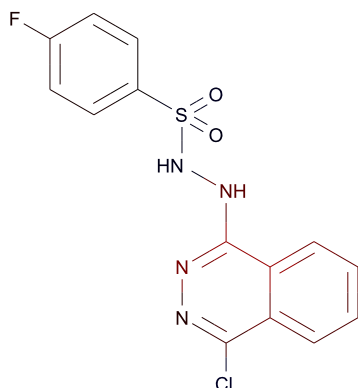
$$\text{C}_{14}\text{H}_{10}\text{ClFN}_4\text{O}_2\text{S}$$

Molecular Weight: 352.7712

|ALogP: 3.248

Rotatable Bonds: 4

Acceptors: 5

Donors: 2

## Model Prediction

**Prediction: Carcinogen**

Probability: 0.437

Enrichment: 1.31

Bayesian Score: 2.56

Mahalanobis Distance: 25.8

Mahalanobis Distance p-value: 1.04e-034

Prediction: Positive if the Bayesian score is above the estimated best cutoff value from minimizing the false positive and false negative rate.

Probability: The estimated probability that the sample is in the positive category. This assumes that the Bayesian score follows a normal distribution and is different from the prediction using a cutoff.

Enrichment: An estimate of enrichment, that is, the increased likelihood (versus random) of this sample being in the category.  
Bayesian Score: The standard Laplacian-modified Bayesian score.

**Mahalanobis Distance:** The Mahalanobis distance (MD) is the distance to the center of the training data. The larger the MD, the less trustworthy the prediction.

Mahalanobis Distance p-value: The p-value gives the fraction of training data with an MD greater than or equal to the one for the given sample, assuming normally distributed data. The smaller the p-value, the less trustworthy the prediction. For highly non-normal X properties (e.g., fingerprints), the MD p-value is wildly inaccurate.

## Structural Similar Compounds

| Name               | Indapamide                                                                          | Niclosamide                                                                         | Acetohexamide                                                                       |
|--------------------|-------------------------------------------------------------------------------------|-------------------------------------------------------------------------------------|-------------------------------------------------------------------------------------|
| Structure          | 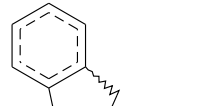 |  |  |
| Actual Endpoint    | Non-Carcinogen                                                                      | Non-Carcinogen                                                                      | Non-Carcinogen                                                                      |
| Predicted Endpoint | Non-Carcinogen                                                                      | Non-Carcinogen                                                                      | Non-Carcinogen                                                                      |
| Distance           | 0.561                                                                               | 0.585                                                                               | 0.587                                                                               |
| Reference          | US FDA (Centre for Drug Eval.& Res./Off. Testing & Res.) Sept. 1997                 | US FDA (Centre for Drug Eval.& Res./Off. Testing & Res.) Sept. 1997                 | US FDA (Centre for Drug Eval.& Res./Off. Testing & Res.) Sept. 1997                 |

## Model Applicability

Unknown features are fingerprint features in the query molecule, but not found or appearing too infrequently in the training set.

1. All properties and OPS components are within expected ranges.

## Feature Contribution

## Top features for positive contribution

| Fingerprint | Bit/Smiles | Feature Structure                                                                                                                                     | Score | Carcinogen in training set |
|-------------|------------|-------------------------------------------------------------------------------------------------------------------------------------------------------|-------|----------------------------|
| SCFP_6      | 1651620003 | 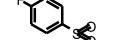<br><chem>[*][c](:[*]):[c]f:[cH]:[cH]:[cH]:[cH]:[c]:1:[*]</chem> | 0.643 | 7 out of 10                |

| SCFP_6                                 | 149212520   | 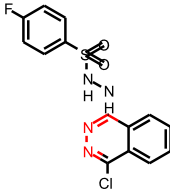<br>[*][c](:[*]):n:n:[*]                           | 0.543  | 9 out of 15                |
|----------------------------------------|-------------|---------------------------------------------------------------------------------------------------------------------------------------|--------|----------------------------|
| SCFP_6                                 | -1379673609 | <br>[*][c](:[*]):[c]F:[cH]:[cH]:[cH]:[*]:[c]:1:[*] | 0.526  | 11 out of 19               |
| Top Features for negative contribution |             |                                                                                                                                       |        |                            |
| Fingerprint                            | Bit/Smiles  | Feature Structure                                                                                                                     | Score  | Carcinogen in training set |
| SCFP_6                                 | -52074512   | <br>[*]:[c](:[*])Cl                                | -0.315 | 14 out of 61               |
| SCFP_6                                 | 21          | <br>[*]S(=[*])(=[*])[*]                           | -0.283 | 7 out of 30                |
| SCFP_6                                 | 1311429347  | <br>[*]S(=[*])(=O)[*]                            | -0.283 | 7 out of 30                |

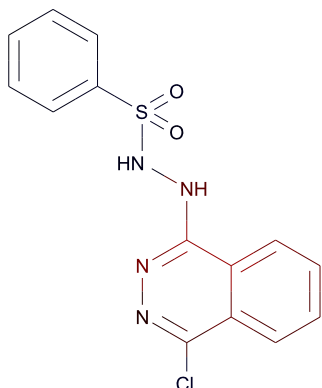
$$\text{C}_{14}\text{H}_{11}\text{ClN}_4\text{O}_2\text{S}$$

Molecular Weight: 334.78073

|ALogP: 3.043

Rotatable Bonds: 4

Acceptors: 5

Donors: 2

## Model Prediction

**Prediction: Carcinogen**

Probability: 0.386

Enrichment: 1.16

Bayesian Score: 1

Mahalanobis Distance: 25.7

Mahalanobis Distance p-value: 1.97e-034

Prediction: Positive if the Bayesian score is above the estimated best cutoff value from minimizing the false positive and false negative rate.

**Probability:** The estimated probability that the sample is in the positive category. This assumes that the Bayesian score follows a normal distribution and is different from the prediction using a cutoff.

Enrichment: An estimate of enrichment, that is, the increased likelihood (versus random) of this sample being in the category.  
Bayesian Score: The standard Laplacian-modified Bayesian score.

**Mahalanobis Distance:** The Mahalanobis distance (MD) is the distance to the center of the training data. The larger the MD, the less trustworthy the prediction.

Mahalanobis Distance p-value: The p-value gives the fraction of training data with an MD greater than or equal to the one for the given sample, assuming normally distributed data. The smaller the p-value, the less trustworthy the prediction. For highly non-normal X properties (e.g., fingerprints), the MD p-value is wildly inaccurate.

## Structural Similar Compounds

| Name               | Indapamide                                                                          | Acetohexamide                                                                       | Mebendazole                                                                         |
|--------------------|-------------------------------------------------------------------------------------|-------------------------------------------------------------------------------------|-------------------------------------------------------------------------------------|
| Structure          | 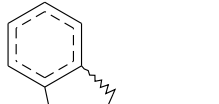 |  |  |
| Actual Endpoint    | Non-Carcinogen                                                                      | Non-Carcinogen                                                                      | Non-Carcinogen                                                                      |
| Predicted Endpoint | Non-Carcinogen                                                                      | Non-Carcinogen                                                                      | Non-Carcinogen                                                                      |
| Distance           | 0.562                                                                               | 0.563                                                                               | 0.576                                                                               |
| Reference          | US FDA (Centre for Drug Eval.& Res./Off. Testing & Res.) Sept. 1997                 | US FDA (Centre for Drug Eval.& Res./Off. Testing & Res.) Sept. 1997                 | US FDA (Centre for Drug Eval.& Res./Off. Testing & Res.) Sept. 1997                 |

## Model Applicability

Unknown features are fingerprint features in the query molecule, but not found or appearing too infrequently in the training set.

1. All properties and OPS components are within expected ranges.

## Feature Contribution

## Top features for positive contribution

| Fingerprint | Bit/Smiles | Feature Structure                                                                                                                                                                                            | Score | Carcinogen in training set |
|-------------|------------|--------------------------------------------------------------------------------------------------------------------------------------------------------------------------------------------------------------|-------|----------------------------|
| SCFP_6      | 1651620003 | 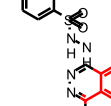 <chem>*c1ccc(cc1)N2C(=NC(N=C2)c3cc4ccccc4cc3)</chem><br>[*][c](:[*]):[c]!:[cH]:[cH]:[cH]:[cH]:[cH]:[cH]:[cH]:[c]:1:[*] | 0.643 | 7 out of 10                |

|                                        |             |                                                                                                                                       |        |                            |
|----------------------------------------|-------------|---------------------------------------------------------------------------------------------------------------------------------------|--------|----------------------------|
| SCFP_6                                 | 149212520   | 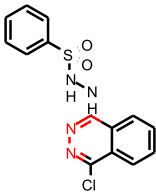<br>[*][c](:[*]):n:n:[*]                           | 0.543  | 9 out of 15                |
| SCFP_6                                 | -1379673609 | <br>[*][c](:[*]):[c]1:[cH]:[cH]:[cH]:[*]:[c]:1:[*] | 0.526  | 11 out of 19               |
| Top Features for negative contribution |             |                                                                                                                                       |        |                            |
| Fingerprint                            | Bit/Smiles  | Feature Structure                                                                                                                     | Score  | Carcinogen in training set |
| SCFP_6                                 | 1653911926  | <br>[*][c]1:[cH]:[cH]:[cH]:[cH]:[cH]:[cH]:1        | -0.504 | 12 out of 64               |
| SCFP_6                                 | -52074512   | <br>[*]:[c](:[*])Cl                               | -0.315 | 14 out of 61               |
| SCFP_6                                 | 1311429347  | <br>[*]S(=[*])(=O)[*]                            | -0.283 | 7 out of 30                |

# Thalidomide

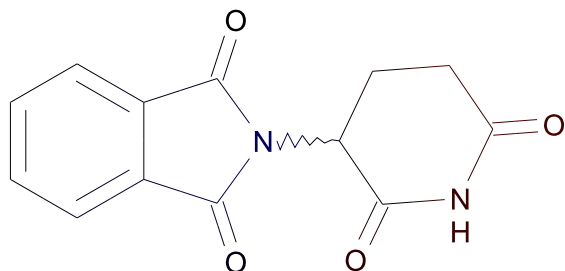

C<sub>13</sub>H<sub>10</sub>N<sub>2</sub>O<sub>4</sub>

Molecular Weight: 258.22949

ALogP: 9.7e-002

Rotatable Bonds: 1

Acceptors: 4

Donors: 1

## Model Prediction

Prediction: Non-Carcinogen

Probability: 0.332

Enrichment: 0.995

Bayesian Score: -0.857

Mahalanobis Distance: 13

Mahalanobis Distance p-value: 0.00164

Prediction: Positive if the Bayesian score is above the estimated best cutoff value from minimizing the false positive and false negative rate.

Probability: The estimated probability that the sample is in the positive category. This assumes that the Bayesian score follows a normal distribution and is different from the prediction using a cutoff.

Enrichment: An estimate of enrichment, that is, the increased likelihood (versus random) of this sample being in the category.

Bayesian Score: The standard Laplacian-modified Bayesian score.

Mahalanobis Distance: The Mahalanobis distance (MD) is the distance to the center of the training data. The larger the MD, the less trustworthy the prediction.

Mahalanobis Distance p-value: The p-value gives the fraction of training data with an MD greater than or equal to the one for the given sample, assuming normally distributed data. The smaller the p-value, the less trustworthy the prediction. For highly non-normal X properties (e.g., fingerprints), the MD p-value is wildly inaccurate.

# TOPKAT\_Rat\_Male\_FDA\_None\_vs\_Carcinogen

## Structural Similar Compounds

| Name               | Milrinone                                                           | Aminogluthethimide                                                  | Theophylline                                                        |
|--------------------|---------------------------------------------------------------------|---------------------------------------------------------------------|---------------------------------------------------------------------|
| Structure          |                                                                     |                                                                     |                                                                     |
| Actual Endpoint    | Non-Carcinogen                                                      | Carcinogen                                                          | Non-Carcinogen                                                      |
| Predicted Endpoint | Non-Carcinogen                                                      | Carcinogen                                                          | Non-Carcinogen                                                      |
| Distance           | 0.582                                                               | 0.597                                                               | 0.614                                                               |
| Reference          | US FDA (Centre for Drug Eval.& Res./Off. Testing & Res.) Sept. 1997 | US FDA (Centre for Drug Eval.& Res./Off. Testing & Res.) Sept. 1997 | US FDA (Centre for Drug Eval.& Res./Off. Testing & Res.) Sept. 1997 |

## Model Applicability

Unknown features are fingerprint features in the query molecule, but not found or appearing too infrequently in the training set.

1. All properties and OPS components are within expected ranges.

## Feature Contribution

### Top features for positive contribution

| Fingerprint | Bit/Smiles  | Feature Structure                  | Score | Carcinogen in training set |
|-------------|-------------|------------------------------------|-------|----------------------------|
| SCFP_6      | -1533214013 | <br><chem>[*]C1CCC(=O)NC1=O</chem> | 0.415 | 1 out of 1                 |

| SCFP_6                                 | 345243876   | 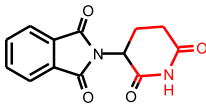<br><chem>[*]=C1[*]CCC(=O)N1</chem>                | 0.415  | 1 out of 1                 |
|----------------------------------------|-------------|---------------------------------------------------------------------------------------------------------------------------------------|--------|----------------------------|
| SCFP_6                                 | 395945879   | <br><chem>[*]C1[*]CC(=O)NC1=O</chem>               | 0.415  | 1 out of 1                 |
| Top Features for negative contribution |             |                                                                                                                                       |        |                            |
| Fingerprint                            | Bit/Smiles  | Feature Structure                                                                                                                     | Score  | Carcinogen in training set |
| SCFP_6                                 | -1946889102 | <br><chem>[*]CC(N([*]))[*]C(=[*])[*]</chem>        | -0.885 | 1 out of 12                |
| SCFP_6                                 | 399659969   | <br><chem>[*]C([*])N1C(=[*])[*]:[*]C1=[*]</chem> | -0.578 | 1 out of 8                 |
| SCFP_6                                 | 1257084377  | <br><chem>[*]N1[*][*]:[c](:[*])C1=O</chem>       | -0.436 | 4 out of 21                |

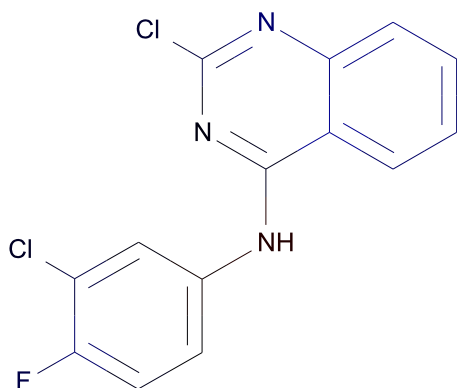

$C_{14}H_8Cl_2FN_3$

Molecular Weight: 308.13782

ALogP: 5.202

Rotatable Bonds: 2

Acceptors: 3

Donors: 1

## Model Prediction

Prediction: Single-Carcinogen

Probability: 0.436

Enrichment: 1.05

Bayesian Score: -5.26

Mahalanobis Distance: 17.2

Mahalanobis Distance p-value: 9.6e-008

Prediction: Positive if the Bayesian score is above the estimated best cutoff value from minimizing the false positive and false negative rate.

Probability: The estimated probability that the sample is in the positive category. This assumes that the Bayesian score follows a normal distribution and is different from the prediction using a cutoff.

Enrichment: An estimate of enrichment, that is, the increased likelihood (versus random) of this sample being in the category.

Bayesian Score: The standard Laplacian-modified Bayesian score.

Mahalanobis Distance: The Mahalanobis distance (MD) is the distance to the center of the training data. The larger the MD, the less trustworthy the prediction.

Mahalanobis Distance p-value: The p-value gives the fraction of training data with an MD greater than or equal to the one for the given sample, assuming normally distributed data. The smaller the p-value, the less trustworthy the prediction. For highly non-normal X properties (e.g., fingerprints), the MD p-value is wildly inaccurate.

## Structural Similar Compounds

| Name               | Mestranol                                                           | Nafenopin                                                           | Norethindrone                                                       |
|--------------------|---------------------------------------------------------------------|---------------------------------------------------------------------|---------------------------------------------------------------------|
| Structure          |                                                                     |                                                                     |                                                                     |
| Actual Endpoint    | Single-Carcinogen                                                   | Multiple-Carcinogen                                                 | Multiple-Carcinogen                                                 |
| Predicted Endpoint | Multiple-Carcinogen                                                 | Multiple-Carcinogen                                                 | Multiple-Carcinogen                                                 |
| Distance           | 0.620                                                               | 0.621                                                               | 0.686                                                               |
| Reference          | US FDA (Centre for Drug Eval.& Res./Off. Testing & Res.) Sept. 1997 | US FDA (Centre for Drug Eval.& Res./Off. Testing & Res.) Sept. 1997 | US FDA (Centre for Drug Eval.& Res./Off. Testing & Res.) Sept. 1997 |

## Model Applicability

Unknown features are fingerprint features in the query molecule, but not found or appearing too infrequently in the training set.

1. All properties and OPS components are within expected ranges.

## Feature Contribution

### Top features for positive contribution

| Fingerprint | Bit/Smiles | Feature Structure                               | Score | Multiple-Carcinogen in training set |
|-------------|------------|-------------------------------------------------|-------|-------------------------------------|
| SCFP_8      | 951581613  | <br><chem>[*]:[c](:[*])N[c](:[*])[*]:[*]</chem> | 0.383 | 1 out of 1                          |

| SCFP_8                                 | -300914917  | 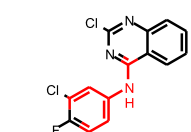<br><chem>[*][c]1:[*]:[cH]:[cH]:[c](N[c](:[*]):[*]):[cH]:1</chem> | 0.383  | 1 out of 1                          |
|----------------------------------------|-------------|------------------------------------------------------------------------------------------------------------------------------------------------------|--------|-------------------------------------|
| SCFP_8                                 | 10          | <br><chem>[*]N[*]</chem>                                          | 0.226  | 18 out of 39                        |
| Top Features for negative contribution |             |                                                                                                                                                      |        |                                     |
| Fingerprint                            | Bit/Smiles  | Feature Structure                                                                                                                                    | Score  | Multiple-Carcinogen in training set |
| SCFP_8                                 | -601571304  | <br><chem>[*][c](:[*]):[c](Cl):[cH]:[*]</chem>                    | -0.707 | 2 out of 14                         |
| SCFP_8                                 | -52074512   | <br><chem>[*]:[c](:[*])Cl</chem>                                 | -0.707 | 2 out of 14                         |
| SCFP_8                                 | -1381862798 | <br><chem>[*]:n:[c]1:[cH]:[cH]:[cH]:[cH]:[*]:[c]:1:[*]</chem>   | -0.572 | 1 out of 7                          |

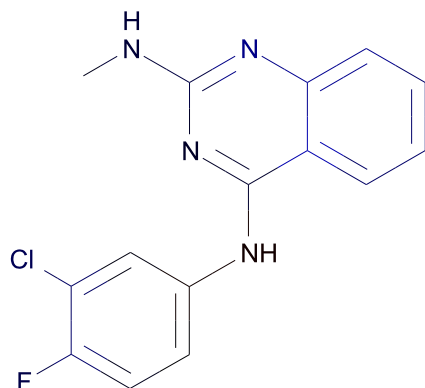

$C_{15}H_{12}ClFN_4$

Molecular Weight: 302.73398

ALogP: 4.677

Rotatable Bonds: 3

Acceptors: 4

Donors: 2

## Model Prediction

Prediction: Single-Carcinogen

Probability: 0.412

Enrichment: 0.995

Bayesian Score: -5.85

Mahalanobis Distance: 18.4

Mahalanobis Distance p-value: 8.86e-009

Prediction: Positive if the Bayesian score is above the estimated best cutoff value from minimizing the false positive and false negative rate.

Probability: The estimated probability that the sample is in the positive category. This assumes that the Bayesian score follows a normal distribution and is different from the prediction using a cutoff.

Enrichment: An estimate of enrichment, that is, the increased likelihood (versus random) of this sample being in the category.

Bayesian Score: The standard Laplacian-modified Bayesian score.

Mahalanobis Distance: The Mahalanobis distance (MD) is the distance to the center of the training data. The larger the MD, the less trustworthy the prediction.

Mahalanobis Distance p-value: The p-value gives the fraction of training data with an MD greater than or equal to the one for the given sample, assuming normally distributed data. The smaller the p-value, the less trustworthy the prediction. For highly non-normal X properties (e.g., fingerprints), the MD p-value is wildly inaccurate.

## Structural Similar Compounds

| Name               | Phenolphthalein                                                     | Doxefazepam                                                         | Diethylstilbestrol                                                  |
|--------------------|---------------------------------------------------------------------|---------------------------------------------------------------------|---------------------------------------------------------------------|
| Structure          |                                                                     |                                                                     |                                                                     |
| Actual Endpoint    | Multiple-Carcinogen                                                 | Single-Carcinogen                                                   | Multiple-Carcinogen                                                 |
| Predicted Endpoint | Multiple-Carcinogen                                                 | Single-Carcinogen                                                   | Multiple-Carcinogen                                                 |
| Distance           | 0.599                                                               | 0.679                                                               | 0.699                                                               |
| Reference          | US FDA (Centre for Drug Eval.& Res./Off. Testing & Res.) Sept. 1997 | US FDA (Centre for Drug Eval.& Res./Off. Testing & Res.) Sept. 1997 | US FDA (Centre for Drug Eval.& Res./Off. Testing & Res.) Sept. 1997 |

## Model Applicability

Unknown features are fingerprint features in the query molecule, but not found or appearing too infrequently in the training set.

1. All properties and OPS components are within expected ranges.

## Feature Contribution

### Top features for positive contribution

| Fingerprint | Bit/Smiles | Feature Structure                            | Score | Multiple-Carcinogen in training set |
|-------------|------------|----------------------------------------------|-------|-------------------------------------|
| SCFP_8      | 951581613  | <br><chem>[*]:[c](:[*])N[c](:[*]):[*]</chem> | 0.383 | 1 out of 1                          |

|                                        |             |                                                                                                                                                      |        |                                     |
|----------------------------------------|-------------|------------------------------------------------------------------------------------------------------------------------------------------------------|--------|-------------------------------------|
| SCFP_8                                 | -300914917  | 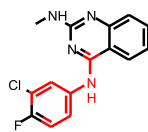<br><chem>[*][c]1:[*]:[cH]:[cH]:[c](N[c](:[*]):[*]):[cH]:1</chem> | 0.383  | 1 out of 1                          |
| SCFP_8                                 | 10          | <br><chem>[*]N[*]</chem>                                          | 0.226  | 18 out of 39                        |
| Top Features for negative contribution |             |                                                                                                                                                      |        |                                     |
| Fingerprint                            | Bit/Smiles  | Feature Structure                                                                                                                                    | Score  | Multiple-Carcinogen in training set |
| SCFP_8                                 | -601571304  | <br><chem>[*][c](:[*]):[c](Cl):[cH]:[*]</chem>                    | -0.707 | 2 out of 14                         |
| SCFP_8                                 | -52074512   | <br><chem>[*]:[c](:[*])Cl</chem>                                | -0.707 | 2 out of 14                         |
| SCFP_8                                 | -1381862798 | <br><chem>[*]:n:[c]1:[cH]:[cH]:[cH]:[*]:[c]:1:[*]</chem>        | -0.572 | 1 out of 7                          |

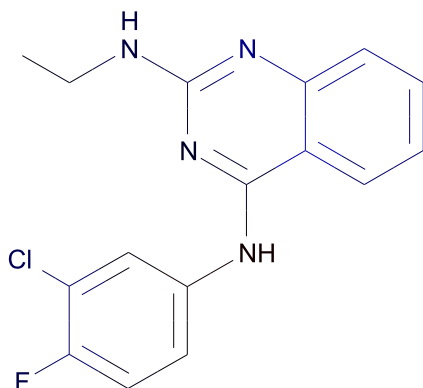

$C_{16}H_{14}ClFN_4$

Molecular Weight: 316.76056

ALogP: 5.025

Rotatable Bonds: 4

Acceptors: 4

Donors: 2

## Model Prediction

Prediction: Single-Carcinogen

Probability: 0.391

Enrichment: 0.945

Bayesian Score: -6.32

Mahalanobis Distance: 19.2

Mahalanobis Distance p-value: 1.65e-009

Prediction: Positive if the Bayesian score is above the estimated best cutoff value from minimizing the false positive and false negative rate.

Probability: The estimated probability that the sample is in the positive category. This assumes that the Bayesian score follows a normal distribution and is different from the prediction using a cutoff.

Enrichment: An estimate of enrichment, that is, the increased likelihood (versus random) of this sample being in the category.

Bayesian Score: The standard Laplacian-modified Bayesian score.

Mahalanobis Distance: The Mahalanobis distance (MD) is the distance to the center of the training data. The larger the MD, the less trustworthy the prediction.

Mahalanobis Distance p-value: The p-value gives the fraction of training data with an MD greater than or equal to the one for the given sample, assuming normally distributed data. The smaller the p-value, the less trustworthy the prediction. For highly non-normal X properties (e.g., fingerprints), the MD p-value is wildly inaccurate.

## Structural Similar Compounds

| Name               | Phenolphthalein                                                     | Nafenopin                                                           | Diethylstilbestrol                                                  |
|--------------------|---------------------------------------------------------------------|---------------------------------------------------------------------|---------------------------------------------------------------------|
| Structure          |                                                                     |                                                                     |                                                                     |
| Actual Endpoint    | Multiple-Carcinogen                                                 | Multiple-Carcinogen                                                 | Multiple-Carcinogen                                                 |
| Predicted Endpoint | Multiple-Carcinogen                                                 | Multiple-Carcinogen                                                 | Multiple-Carcinogen                                                 |
| Distance           | 0.665                                                               | 0.686                                                               | 0.686                                                               |
| Reference          | US FDA (Centre for Drug Eval.& Res./Off. Testing & Res.) Sept. 1997 | US FDA (Centre for Drug Eval.& Res./Off. Testing & Res.) Sept. 1997 | US FDA (Centre for Drug Eval.& Res./Off. Testing & Res.) Sept. 1997 |

## Model Applicability

Unknown features are fingerprint features in the query molecule, but not found or appearing too infrequently in the training set.

1. All properties and OPS components are within expected ranges.

## Feature Contribution

### Top features for positive contribution

| Fingerprint | Bit/Smiles | Feature Structure                            | Score | Multiple-Carcinogen in training set |
|-------------|------------|----------------------------------------------|-------|-------------------------------------|
| SCFP_8      | 951581613  | <br><chem>[*]:[c](:[*])N[c](:[*]):[*]</chem> | 0.383 | 1 out of 1                          |

|                                        |             |                                                                                                                                                    |        |                                     |
|----------------------------------------|-------------|----------------------------------------------------------------------------------------------------------------------------------------------------|--------|-------------------------------------|
| SCFP_8                                 | -300914917  | 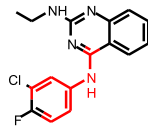<br><chem>*[c]1:[*]:[cH]:[cH]:[c](N[c](:[*]):[*]):[cH]:1</chem> | 0.383  | 1 out of 1                          |
| SCFP_8                                 | 10          | <br><chem>*]N[*]</chem>                                         | 0.226  | 18 out of 39                        |
| Top Features for negative contribution |             |                                                                                                                                                    |        |                                     |
| Fingerprint                            | Bit/Smiles  | Feature Structure                                                                                                                                  | Score  | Multiple-Carcinogen in training set |
| SCFP_8                                 | -52074512   | <br><chem>*]:[c](:[*])Cl</chem>                                 | -0.707 | 2 out of 14                         |
| SCFP_8                                 | -601571304  | <br><chem>*][c](:[*]):[c](Cl):[cH]:[*]</chem>                 | -0.707 | 2 out of 14                         |
| SCFP_8                                 | -1381862798 | <br><chem>*]:n:[c]1:[cH]:[cH]:[cH]:[*]:[c]:1:[*]</chem>       | -0.572 | 1 out of 7                          |

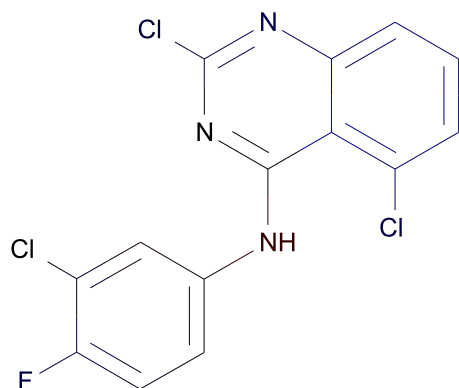

$C_{14}H_7Cl_3FN_3$

Molecular Weight: 342.58288

ALogP: 5.867

Rotatable Bonds: 2

Acceptors: 3

Donors: 1

## Model Prediction

Prediction: Single-Carcinogen

Probability: 0.417

Enrichment: 1.01

Bayesian Score: -5.74

Mahalanobis Distance: 18.5

Mahalanobis Distance p-value: 7.37e-009

Prediction: Positive if the Bayesian score is above the estimated best cutoff value from minimizing the false positive and false negative rate.

Probability: The estimated probability that the sample is in the positive category. This assumes that the Bayesian score follows a normal distribution and is different from the prediction using a cutoff.

Enrichment: An estimate of enrichment, that is, the increased likelihood (versus random) of this sample being in the category.

Bayesian Score: The standard Laplacian-modified Bayesian score.

Mahalanobis Distance: The Mahalanobis distance (MD) is the distance to the center of the training data. The larger the MD, the less trustworthy the prediction.

Mahalanobis Distance p-value: The p-value gives the fraction of training data with an MD greater than or equal to the one for the given sample, assuming normally distributed data. The smaller the p-value, the less trustworthy the prediction. For highly non-normal X properties (e.g., fingerprints), the MD p-value is wildly inaccurate.

## Structural Similar Compounds

| Name               | Mestranol                                                           | Nafenopin                                                           | Sertraline                                                          |
|--------------------|---------------------------------------------------------------------|---------------------------------------------------------------------|---------------------------------------------------------------------|
| Structure          |                                                                     |                                                                     |                                                                     |
| Actual Endpoint    | Single-Carcinogen                                                   | Multiple-Carcinogen                                                 | Single-Carcinogen                                                   |
| Predicted Endpoint | Multiple-Carcinogen                                                 | Multiple-Carcinogen                                                 | Single-Carcinogen                                                   |
| Distance           | 0.653                                                               | 0.662                                                               | 0.706                                                               |
| Reference          | US FDA (Centre for Drug Eval.& Res./Off. Testing & Res.) Sept. 1997 | US FDA (Centre for Drug Eval.& Res./Off. Testing & Res.) Sept. 1997 | US FDA (Centre for Drug Eval.& Res./Off. Testing & Res.) Sept. 1997 |

## Model Applicability

Unknown features are fingerprint features in the query molecule, but not found or appearing too infrequently in the training set.

1. All properties and OPS components are within expected ranges.

## Feature Contribution

### Top features for positive contribution

| Fingerprint | Bit/Smiles | Feature Structure                                            | Score | Multiple-Carcinogen in training set |
|-------------|------------|--------------------------------------------------------------|-------|-------------------------------------|
| SCFP_8      | -300914917 | <br>[*][c]1:[*]:[cH]:[cH]<br>:[c](N[c](:[*]):[*])<br>:[cH]:1 | 0.383 | 1 out of 1                          |

|                                        |             |                                                                                                                                           |        |                                     |
|----------------------------------------|-------------|-------------------------------------------------------------------------------------------------------------------------------------------|--------|-------------------------------------|
| SCFP_8                                 | 951581613   | 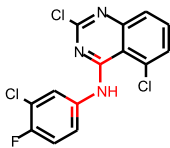<br><chem>[*]:[c](:[*])N[c](:[*])</chem>               | 0.383  | 1 out of 1                          |
| SCFP_8                                 | 10          | <br><chem>[*]N[*]</chem>                               | 0.226  | 18 out of 39                        |
| Top Features for negative contribution |             |                                                                                                                                           |        |                                     |
| Fingerprint                            | Bit/Smiles  | Feature Structure                                                                                                                         | Score  | Multiple-Carcinogen in training set |
| SCFP_8                                 | -601571304  | <br><chem>[*][c](:[*]):[c](Cl):[cH]:[*]</chem>         | -0.707 | 2 out of 14                         |
| SCFP_8                                 | -52074512   | <br><chem>[*]:[c](:[*])Cl</chem>                     | -0.707 | 2 out of 14                         |
| SCFP_8                                 | -1378360678 | <br><chem>[*]:[c]1:[*]:[cH]:[cH]:[cH]:[c]:1Cl</chem> | -0.58  | 2 out of 12                         |

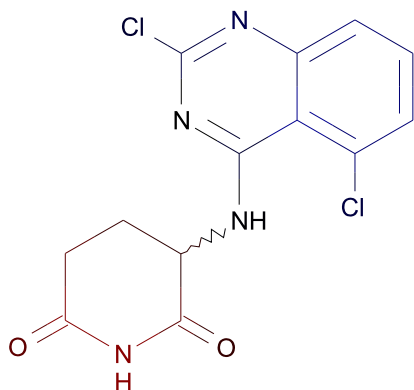
 $C_{13}H_{10}Cl_2N_4O_2$ 

Molecular Weight: 325.15009

ALogP: 2.49

Rotatable Bonds: 2

Acceptors: 5

Donors: 2

## Model Prediction

Prediction: Single-Carcinogen

Probability: 0.535

Enrichment: 1.29

Bayesian Score: -2

Mahalanobis Distance: 17.4

Mahalanobis Distance p-value: 6.3e-008

Prediction: Positive if the Bayesian score is above the estimated best cutoff value from minimizing the false positive and false negative rate.

Probability: The estimated probability that the sample is in the positive category. This assumes that the Bayesian score follows a normal distribution and is different from the prediction using a cutoff.

Enrichment: An estimate of enrichment, that is, the increased likelihood (versus random) of this sample being in the category.

Bayesian Score: The standard Laplacian-modified Bayesian score.

Mahalanobis Distance: The Mahalanobis distance (MD) is the distance to the center of the training data. The larger the MD, the less trustworthy the prediction.

Mahalanobis Distance p-value: The p-value gives the fraction of training data with an MD greater than or equal to the one for the given sample, assuming normally distributed data. The smaller the p-value, the less trustworthy the prediction. For highly non-normal X properties (e.g., fingerprints), the MD p-value is wildly inaccurate.

## Structural Similar Compounds

| Name               | Doxefazepam                                                         | Phenolphthalein                                                     | Oxazepam                                                            |
|--------------------|---------------------------------------------------------------------|---------------------------------------------------------------------|---------------------------------------------------------------------|
| Structure          |                                                                     |                                                                     |                                                                     |
| Actual Endpoint    | Single-Carcinogen                                                   | Multiple-Carcinogen                                                 | Single-Carcinogen                                                   |
| Predicted Endpoint | Single-Carcinogen                                                   | Multiple-Carcinogen                                                 | Single-Carcinogen                                                   |
| Distance           | 0.597                                                               | 0.663                                                               | 0.666                                                               |
| Reference          | US FDA (Centre for Drug Eval.& Res./Off. Testing & Res.) Sept. 1997 | US FDA (Centre for Drug Eval.& Res./Off. Testing & Res.) Sept. 1997 | US FDA (Centre for Drug Eval.& Res./Off. Testing & Res.) Sept. 1997 |

## Model Applicability

Unknown features are fingerprint features in the query molecule, but not found or appearing too infrequently in the training set.

1. All properties and OPS components are within expected ranges.

## Feature Contribution

### Top features for positive contribution

| Fingerprint | Bit/Smiles | Feature Structure         | Score | Multiple-Carcinogen in training set |
|-------------|------------|---------------------------|-------|-------------------------------------|
| SCFP_8      | 1631785938 | <br>[*]C(=[*])NC(=[*])[*] | 0.574 | 4 out of 5                          |

|                                        |             |                                                                                                                                           |        |                                     |
|----------------------------------------|-------------|-------------------------------------------------------------------------------------------------------------------------------------------|--------|-------------------------------------|
| SCFP_8                                 | 345243876   | 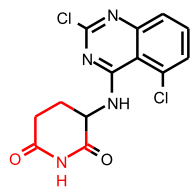<br><chem>[*]=C1[*]CCC(=O)N1</chem>                    | 0.383  | 1 out of 1                          |
| SCFP_8                                 | -1072897324 | <br><chem>[*]C1[*]NC(=O)CC1</chem>                     | 0.383  | 1 out of 1                          |
| Top Features for negative contribution |             |                                                                                                                                           |        |                                     |
| Fingerprint                            | Bit/Smiles  | Feature Structure                                                                                                                         | Score  | Multiple-Carcinogen in training set |
| SCFP_8                                 | -601571304  | <br><chem>[*][c](:[*]):[c](Cl):[cH]:[*]</chem>         | -0.707 | 2 out of 14                         |
| SCFP_8                                 | -52074512   | <br><chem>[*]:[c](:[*])Cl</chem>                     | -0.707 | 2 out of 14                         |
| SCFP_8                                 | -1378360678 | <br><chem>[*]:[c]1:[*]:[cH]:[cH]:[cH]:[c]:1Cl</chem> | -0.58  | 2 out of 12                         |

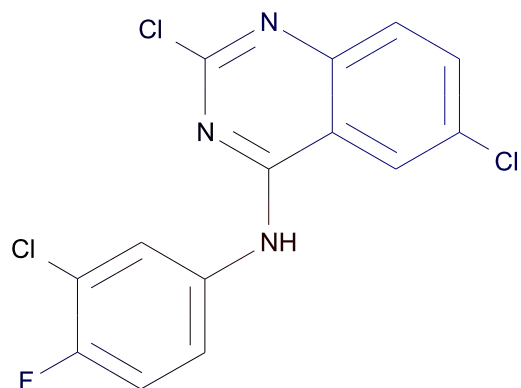

$C_{14}H_7Cl_3FN_3$

Molecular Weight: 342.58288

ALogP: 5.867

Rotatable Bonds: 2

Acceptors: 3

Donors: 1

## Model Prediction

Prediction: Single-Carcinogen

Probability: 0.413

Enrichment: 0.999

Bayesian Score: -5.82

Mahalanobis Distance: 18.5

Mahalanobis Distance p-value: 7.12e-009

Prediction: Positive if the Bayesian score is above the estimated best cutoff value from minimizing the false positive and false negative rate.

Probability: The estimated probability that the sample is in the positive category. This assumes that the Bayesian score follows a normal distribution and is different from the prediction using a cutoff.

Enrichment: An estimate of enrichment, that is, the increased likelihood (versus random) of this sample being in the category.

Bayesian Score: The standard Laplacian-modified Bayesian score.

Mahalanobis Distance: The Mahalanobis distance (MD) is the distance to the center of the training data. The larger the MD, the less trustworthy the prediction.

Mahalanobis Distance p-value: The p-value gives the fraction of training data with an MD greater than or equal to the one for the given sample, assuming normally distributed data. The smaller the p-value, the less trustworthy the prediction. For highly non-normal X properties (e.g., fingerprints), the MD p-value is wildly inaccurate.

## Structural Similar Compounds

| Name               | Mestranol                                                           | Nafenopin                                                           | Chlorpromazine                                                      |
|--------------------|---------------------------------------------------------------------|---------------------------------------------------------------------|---------------------------------------------------------------------|
| Structure          |                                                                     |                                                                     |                                                                     |
| Actual Endpoint    | Single-Carcinogen                                                   | Multiple-Carcinogen                                                 | Single-Carcinogen                                                   |
| Predicted Endpoint | Multiple-Carcinogen                                                 | Multiple-Carcinogen                                                 | Single-Carcinogen                                                   |
| Distance           | 0.653                                                               | 0.667                                                               | 0.707                                                               |
| Reference          | US FDA (Centre for Drug Eval.& Res./Off. Testing & Res.) Sept. 1997 | US FDA (Centre for Drug Eval.& Res./Off. Testing & Res.) Sept. 1997 | US FDA (Centre for Drug Eval.& Res./Off. Testing & Res.) Sept. 1997 |

## Model Applicability

Unknown features are fingerprint features in the query molecule, but not found or appearing too infrequently in the training set.

1. All properties and OPS components are within expected ranges.

## Feature Contribution

### Top features for positive contribution

| Fingerprint | Bit/Smiles | Feature Structure                                                 | Score | Multiple-Carcinogen in training set |
|-------------|------------|-------------------------------------------------------------------|-------|-------------------------------------|
| SCFP_8      | -300914917 | <br><chem>[*][c]1:[*]:[cH]:[cH]:[c](N[c](:[*]):[*]):[cH]:1</chem> | 0.383 | 1 out of 1                          |

|                                        |             |                                                                                                                                           |        |                                     |
|----------------------------------------|-------------|-------------------------------------------------------------------------------------------------------------------------------------------|--------|-------------------------------------|
| SCFP_8                                 | 951581613   | 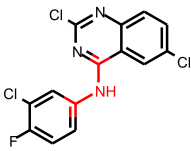<br><chem>[*]:[c](:[*])N[c](:[*])</chem>               | 0.383  | 1 out of 1                          |
| SCFP_8                                 | 10          | <br><chem>[*]N[*]</chem>                               | 0.226  | 18 out of 39                        |
| Top Features for negative contribution |             |                                                                                                                                           |        |                                     |
| Fingerprint                            | Bit/Smiles  | Feature Structure                                                                                                                         | Score  | Multiple-Carcinogen in training set |
| SCFP_8                                 | -601571304  | <br><chem>[*][c](:[*]):[c](Cl):[cH]:[*]</chem>         | -0.707 | 2 out of 14                         |
| SCFP_8                                 | -52074512   | <br><chem>[*]:[c](:[*])Cl</chem>                     | -0.707 | 2 out of 14                         |
| SCFP_8                                 | -1378360678 | <br><chem>[*]:[c]1:[*]:[cH]:[cH]:[cH]:[c]:1Cl</chem> | -0.58  | 2 out of 12                         |

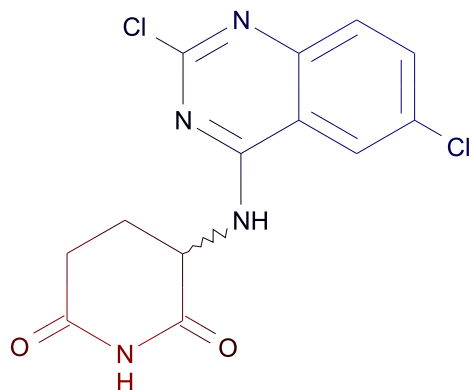
 $C_{13}H_{10}Cl_2N_4O_2$ 

Molecular Weight: 325.15009

ALogP: 2.49

Rotatable Bonds: 2

Acceptors: 5

Donors: 2

## Model Prediction

Prediction: Single-Carcinogen

Probability: 0.533

Enrichment: 1.29

Bayesian Score: -2.08

Mahalanobis Distance: 17

Mahalanobis Distance p-value: 1.43e-007

Prediction: Positive if the Bayesian score is above the estimated best cutoff value from minimizing the false positive and false negative rate.

Probability: The estimated probability that the sample is in the positive category. This assumes that the Bayesian score follows a normal distribution and is different from the prediction using a cutoff.

Enrichment: An estimate of enrichment, that is, the increased likelihood (versus random) of this sample being in the category.

Bayesian Score: The standard Laplacian-modified Bayesian score.

Mahalanobis Distance: The Mahalanobis distance (MD) is the distance to the center of the training data. The larger the MD, the less trustworthy the prediction.

Mahalanobis Distance p-value: The p-value gives the fraction of training data with an MD greater than or equal to the one for the given sample, assuming normally distributed data. The smaller the p-value, the less trustworthy the prediction. For highly non-normal X properties (e.g., fingerprints), the MD p-value is wildly inaccurate.

## Structural Similar Compounds

| Name               | Doxefazepam                                                         | Oxazepam                                                            | Phenolphthalein                                                     |
|--------------------|---------------------------------------------------------------------|---------------------------------------------------------------------|---------------------------------------------------------------------|
| Structure          |                                                                     |                                                                     |                                                                     |
| Actual Endpoint    | Single-Carcinogen                                                   | Single-Carcinogen                                                   | Multiple-Carcinogen                                                 |
| Predicted Endpoint | Single-Carcinogen                                                   | Single-Carcinogen                                                   | Multiple-Carcinogen                                                 |
| Distance           | 0.597                                                               | 0.666                                                               | 0.668                                                               |
| Reference          | US FDA (Centre for Drug Eval.& Res./Off. Testing & Res.) Sept. 1997 | US FDA (Centre for Drug Eval.& Res./Off. Testing & Res.) Sept. 1997 | US FDA (Centre for Drug Eval.& Res./Off. Testing & Res.) Sept. 1997 |

## Model Applicability

Unknown features are fingerprint features in the query molecule, but not found or appearing too infrequently in the training set.

1. All properties and OPS components are within expected ranges.

## Feature Contribution

### Top features for positive contribution

| Fingerprint | Bit/Smiles | Feature Structure                      | Score | Multiple-Carcinogen in training set |
|-------------|------------|----------------------------------------|-------|-------------------------------------|
| SCFP_8      | 1631785938 | <br><chem>*[C](=[*])NC(=[*])[*]</chem> | 0.574 | 4 out of 5                          |

|                                        |             |                                                                                                                                           |        |                                     |
|----------------------------------------|-------------|-------------------------------------------------------------------------------------------------------------------------------------------|--------|-------------------------------------|
| SCFP_8                                 | 345243876   | 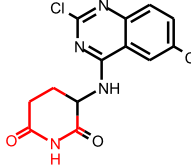<br><chem>[*]=C1[*]CCC(=O)N1</chem>                    | 0.383  | 1 out of 1                          |
| SCFP_8                                 | -1072897324 | <br><chem>[*]C1[*]NC(=O)CC1</chem>                     | 0.383  | 1 out of 1                          |
| Top Features for negative contribution |             |                                                                                                                                           |        |                                     |
| Fingerprint                            | Bit/Smiles  | Feature Structure                                                                                                                         | Score  | Multiple-Carcinogen in training set |
| SCFP_8                                 | -52074512   | <br><chem>[*]:[c](:[*])Cl</chem>                       | -0.707 | 2 out of 14                         |
| SCFP_8                                 | -601571304  | <br><chem>[*][c](:[*]):[c](Cl):[cH]:[*]</chem>       | -0.707 | 2 out of 14                         |
| SCFP_8                                 | -1378360678 | <br><chem>[*]:[c]1:[*]:[cH]:[cH]:[cH]:[c]:1Cl</chem> | -0.58  | 2 out of 12                         |

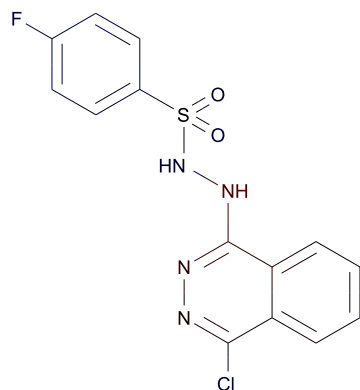

$C_{14}H_{10}ClFN_4O_2S$

Molecular Weight: 352.7712

ALogP: 3.248

Rotatable Bonds: 4

Acceptors: 5

Donors: 2

## Model Prediction

Prediction: Single-Carcinogen

Probability: 0.522

Enrichment: 1.26

Bayesian Score: -2.59

Mahalanobis Distance: 14.7

Mahalanobis Distance p-value: 1.95e-005

Prediction: Positive if the Bayesian score is above the estimated best cutoff value from minimizing the false positive and false negative rate.

Probability: The estimated probability that the sample is in the positive category. This assumes that the Bayesian score follows a normal distribution and is different from the prediction using a cutoff.

Enrichment: An estimate of enrichment, that is, the increased likelihood (versus random) of this sample being in the category.

Bayesian Score: The standard Laplacian-modified Bayesian score.

Mahalanobis Distance: The Mahalanobis distance (MD) is the distance to the center of the training data. The larger the MD, the less trustworthy the prediction.

Mahalanobis Distance p-value: The p-value gives the fraction of training data with an MD greater than or equal to the one for the given sample, assuming normally distributed data. The smaller the p-value, the less trustworthy the prediction. For highly non-normal X properties (e.g., fingerprints), the MD p-value is wildly inaccurate.

## Structural Similar Compounds

| Name               | Doxefazepam                                                         | Bicalutamide                                                        | Torsemide                                                           |
|--------------------|---------------------------------------------------------------------|---------------------------------------------------------------------|---------------------------------------------------------------------|
| Structure          |                                                                     |                                                                     |                                                                     |
| Actual Endpoint    | Single-Carcinogen                                                   | Multiple-Carcinogen                                                 | Multiple-Carcinogen                                                 |
| Predicted Endpoint | Single-Carcinogen                                                   | Multiple-Carcinogen                                                 | Multiple-Carcinogen                                                 |
| Distance           | 0.615                                                               | 0.635                                                               | 0.669                                                               |
| Reference          | US FDA (Centre for Drug Eval.& Res./Off. Testing & Res.) Sept. 1997 | US FDA (Centre for Drug Eval.& Res./Off. Testing & Res.) Sept. 1997 | US FDA (Centre for Drug Eval.& Res./Off. Testing & Res.) Sept. 1997 |

## Model Applicability

Unknown features are fingerprint features in the query molecule, but not found or appearing too infrequently in the training set.

1. All properties and OPS components are within expected ranges.

## Feature Contribution

### Top features for positive contribution

| Fingerprint | Bit/Smiles | Feature Structure                                              | Score | Multiple-Carcinogen in training set |
|-------------|------------|----------------------------------------------------------------|-------|-------------------------------------|
| SCFP_8      | 2144224020 | <br>[*]S(=[*])(=[*])[c]1:<br>[cH]:[cH]:[c](F):[cH]<br>]:[cH]:1 | 0.383 | 1 out of 1                          |

|                                        |             |                                                                                                                                                                                                 |        |                                     |
|----------------------------------------|-------------|-------------------------------------------------------------------------------------------------------------------------------------------------------------------------------------------------|--------|-------------------------------------|
| SCFP_8                                 | -705181820  | 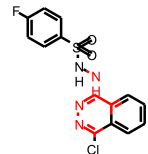<br><chem>[*]N[c]1:n:n:[c]([*])</chem><br><chem>:[*]:[c]:1:[*]</chem>                                        | 0.383  | 1 out of 1                          |
| SCFP_8                                 | -1038366601 | <br><chem>[*]N[c]1:n:[*]:[c]([*]</chem><br><chem>]):[c]2:[cH]:[*]:[cH]</chem><br><chem>]:[cH]:[c]:1:2</chem> | 0.383  | 1 out of 1                          |
| Top Features for negative contribution |             |                                                                                                                                                                                                 |        |                                     |
| Fingerprint                            | Bit/Smiles  | Feature Structure                                                                                                                                                                               | Score  | Multiple-Carcinogen in training set |
| SCFP_8                                 | -1247518081 | <br><chem>[*]NS(=O)(=O)[c]1:[cH]</chem><br><chem>]:[cH]:[*]:[cH]:[cH]</chem><br><chem>:1</chem>              | -0.737 | 0 out of 3                          |
| SCFP_8                                 | -52074512   | <br><chem>[*]:[c](:[*])Cl</chem>                                                                           | -0.707 | 2 out of 14                         |
| SCFP_8                                 | -730654023  | <br><chem>[*][c](:[*]):[c](F):[</chem><br><chem>cH]:[*]</chem>                                             | -0.463 | 1 out of 6                          |

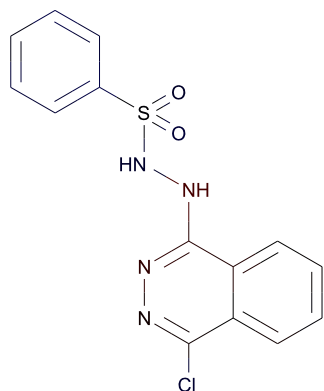

C<sub>14</sub>H<sub>11</sub>ClN<sub>4</sub>O<sub>2</sub>S

Molecular Weight: 334.78073

ALogP: 3.043

Rotatable Bonds: 4

Acceptors: 5

Donors: 2

## Model Prediction

Prediction: Single-Carcinogen

Probability: 0.522

Enrichment: 1.26

Bayesian Score: -2.6

Mahalanobis Distance: 15.3

Mahalanobis Distance p-value: 5.78e-006

Prediction: Positive if the Bayesian score is above the estimated best cutoff value from minimizing the false positive and false negative rate.

Probability: The estimated probability that the sample is in the positive category. This assumes that the Bayesian score follows a normal distribution and is different from the prediction using a cutoff.

Enrichment: An estimate of enrichment, that is, the increased likelihood (versus random) of this sample being in the category.

Bayesian Score: The standard Laplacian-modified Bayesian score.

Mahalanobis Distance: The Mahalanobis distance (MD) is the distance to the center of the training data. The larger the MD, the less trustworthy the prediction.

Mahalanobis Distance p-value: The p-value gives the fraction of training data with an MD greater than or equal to the one for the given sample, assuming normally distributed data. The smaller the p-value, the less trustworthy the prediction. For highly non-normal X properties (e.g., fingerprints), the MD p-value is wildly inaccurate.

## Structural Similar Compounds

| Name               | Doxefazepam                                                         | Torsemide                                                           | Omeprazole                                                          |
|--------------------|---------------------------------------------------------------------|---------------------------------------------------------------------|---------------------------------------------------------------------|
| Structure          |                                                                     |                                                                     |                                                                     |
| Actual Endpoint    | Single-Carcinogen                                                   | Multiple-Carcinogen                                                 | Single-Carcinogen                                                   |
| Predicted Endpoint | Single-Carcinogen                                                   | Multiple-Carcinogen                                                 | Single-Carcinogen                                                   |
| Distance           | 0.636                                                               | 0.666                                                               | 0.688                                                               |
| Reference          | US FDA (Centre for Drug Eval.& Res./Off. Testing & Res.) Sept. 1997 | US FDA (Centre for Drug Eval.& Res./Off. Testing & Res.) Sept. 1997 | US FDA (Centre for Drug Eval.& Res./Off. Testing & Res.) Sept. 1997 |

## Model Applicability

Unknown features are fingerprint features in the query molecule, but not found or appearing too infrequently in the training set.

1. All properties and OPS components are within expected ranges.

## Feature Contribution

### Top features for positive contribution

| Fingerprint | Bit/Smiles | Feature Structure                                                 | Score | Multiple-Carcinogen in training set |
|-------------|------------|-------------------------------------------------------------------|-------|-------------------------------------|
| SCFP_8      | 2097816882 | <br>[*]N[c]1:n:[*]P[c]([*]):[c]2:[cH]:[cH]:[cH]:[cH]:[cH]:[c]:1:2 | 0.383 | 1 out of 1                          |

|                                        |             |                                                                                                                                                                                                 |        |                                     |
|----------------------------------------|-------------|-------------------------------------------------------------------------------------------------------------------------------------------------------------------------------------------------|--------|-------------------------------------|
| SCFP_8                                 | -705181820  | 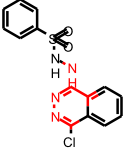<br><chem>[*]N[c]1:n:n:[c]([*])</chem><br><chem>:[*]:[c]:1:[*]</chem>                                        | 0.383  | 1 out of 1                          |
| SCFP_8                                 | -1038366601 | <br><chem>[*]N[c]1:n:[*]:[c]([*]</chem><br><chem>]):[c]2:[cH]:[*]:[cH]</chem><br><chem>]:[cH]:[c]:1:2</chem> | 0.383  | 1 out of 1                          |
| Top Features for negative contribution |             |                                                                                                                                                                                                 |        |                                     |
| Fingerprint                            | Bit/Smiles  | Feature Structure                                                                                                                                                                               | Score  | Multiple-Carcinogen in training set |
| SCFP_8                                 | 1653911926  | <br><chem>[*][c]1:[cH]:[cH]:[cH]:[cH]</chem><br><chem>]:[cH]:[cH]:1</chem>                                   | -0.985 | 1 out of 12                         |
| SCFP_8                                 | -1247518081 | <br><chem>[*]NS(=O)(=O)[c]1:[cH]</chem><br><chem>]:[cH]:[*]:[cH]:[cH]</chem><br><chem>:1</chem>            | -0.737 | 0 out of 3                          |
| SCFP_8                                 | -52074512   | <br><chem>[*]:[c](:[*])Cl</chem>                                                                           | -0.707 | 2 out of 14                         |

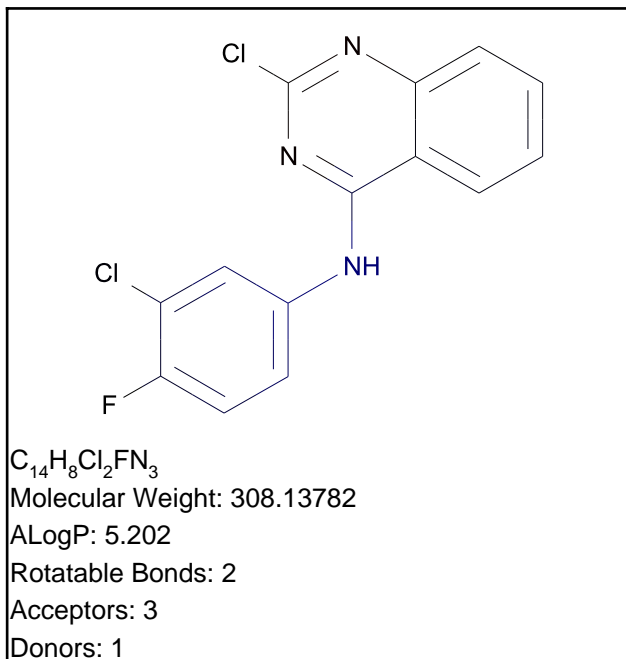

## Model Prediction

Prediction: Non-Irritant

Probability: 0.916

Enrichment: 0.995

Bayesian Score: -2.55

Mahalanobis Distance: 7.24

Mahalanobis Distance p-value: 0.989

Prediction: Positive if the Bayesian score is above the estimated best cutoff value from minimizing the false positive and false negative rate.

Probability: The estimated probability that the sample is in the positive category. This assumes that the Bayesian score follows a normal distribution and is different from the prediction using a cutoff.

Enrichment: An estimate of enrichment, that is, the increased likelihood (versus random) of this sample being in the category.

Bayesian Score: The standard Laplacian-modified Bayesian score.

Mahalanobis Distance: The Mahalanobis distance (MD) is the distance to the center of the training data. The larger the MD, the less trustworthy the prediction.

Mahalanobis Distance p-value: The p-value gives the fraction of training data with an MD greater than or equal to the one for the given sample, assuming normally distributed data. The smaller the p-value, the less trustworthy the prediction. For highly non-normal X properties (e.g., fingerprints), the MD p-value is wildly inaccurate.

## Structural Similar Compounds

| Name               | Aniline, 2,4-bis(o-methylphenoxy)-                                                                                                                | Anthraquinone, 1-(2,4,6-trimethylphenylamino)-                                                                                                                                                                    | s-Triazine, 2,4-dichloro-6-(o-chloroanilino)-                                       |
|--------------------|---------------------------------------------------------------------------------------------------------------------------------------------------|-------------------------------------------------------------------------------------------------------------------------------------------------------------------------------------------------------------------|-------------------------------------------------------------------------------------|
| Structure          | 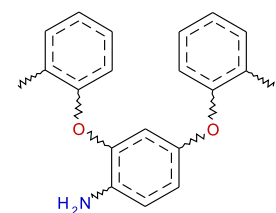                                                               |                                                                                                                                |  |
| Actual Endpoint    | Irritant                                                                                                                                          | Irritant                                                                                                                                                                                                          | Irritant                                                                            |
| Predicted Endpoint | Non-Irritant                                                                                                                                      | Non-Irritant                                                                                                                                                                                                      | Non-Irritant                                                                        |
| Distance           | 0.566                                                                                                                                             | 0.568                                                                                                                                                                                                             | 0.584                                                                               |
| Reference          | 85JCAE "Prehled Prumyslove Toxikologie; Organické Latky," Marhold, J., Prague, Czechoslovakia, Avicenum, 1986 Volume(issue)/page/year: -,725,1986 | 28ZPAK "Sbornik Vysledku Toxikologickeho Vysvetreni Latek A Pripravku," Marhold, J.V., Institut Pro Vychovu Vedoucich Pracovniku Chemického Prumyslu Praha, Czechoslovakia, 1972 Volume(issue)/page/year: -,242,1 | 34ZIAG* -,235,69                                                                    |

## Model Applicability

Unknown features are fingerprint features in the query molecule, but not found or appearing too infrequently in the training set.

1. All properties and OPS components are within expected ranges.

## Feature Contribution

| Top features for positive contribution |            |                   |       |                          |
|----------------------------------------|------------|-------------------|-------|--------------------------|
| Fingerprint                            | Bit/Smiles | Feature Structure | Score | Irritant in training set |
|                                        |            |                   |       |                          |

|                                        |             |                                                                                                                                                       |        |                          |
|----------------------------------------|-------------|-------------------------------------------------------------------------------------------------------------------------------------------------------|--------|--------------------------|
| FCFP_12                                | -1185376954 | 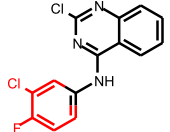<br><chem>F[c]1:[cH]:[cH]:[*]:[cH]:[c]:1Cl</chem>                  | 0.0756 | 6 out of 6               |
| FCFP_12                                | -2069374281 | <br><chem>[*][c]1:[*]:[c](:[*]):n:[c](Cl):n:1</chem>               | 0.0703 | 4 out of 4               |
| FCFP_12                                | -2132756387 | <br><chem>[*][c]1:[cH]:[cH]:[c](F):[c](Cl):[cH]:1</chem>           | 0.0703 | 4 out of 4               |
| Top Features for negative contribution |             |                                                                                                                                                       |        |                          |
| Fingerprint                            | Bit/Smiles  | Feature Structure                                                                                                                                     | Score  | Irritant in training set |
| FCFP_12                                | 839741273   | <br><chem>[*][c]1:[*]:[cH]:[cH]:[c](N[c](:[*]):[*]):[cH]:1</chem> | -0.708 | 4 out of 10              |
| FCFP_12                                | -773983804  | <br><chem>[*]N[c]1:[cH]:[*]:[c]([*]):[cH]:[cH]:1</chem>          | -0.444 | 46 out of 79             |

7a

## TOPKAT\_Skin\_Irritancy\_None\_vs\_Irritant

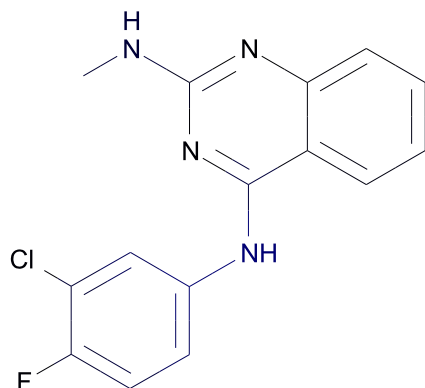C<sub>15</sub>H<sub>12</sub>ClFN<sub>4</sub>

Molecular Weight: 302.73398

ALogP: 4.677

Rotatable Bonds: 3

Acceptors: 4

Donors: 2

**Model Prediction**

Prediction: Non-Irritant

Probability: 0.547

Enrichment: 0.594

Bayesian Score: -4.42

Mahalanobis Distance: 7.41

Mahalanobis Distance p-value: 0.98

Prediction: Positive if the Bayesian score is above the estimated best cutoff value from minimizing the false positive and false negative rate.

Probability: The estimated probability that the sample is in the positive category. This assumes that the Bayesian score follows a normal distribution and is different from the prediction using a cutoff.

Enrichment: An estimate of enrichment, that is, the increased likelihood (versus random) of this sample being in the category.

Bayesian Score: The standard Laplacian-modified Bayesian score.

Mahalanobis Distance: The Mahalanobis distance (MD) is the distance to the center of the training data. The larger the MD, the less trustworthy the prediction.

Mahalanobis Distance p-value: The p-value gives the fraction of training data with an MD greater than or equal to the one for the given sample, assuming normally distributed data. The smaller the p-value, the less trustworthy the prediction. For highly non-normal X properties (e.g., fingerprints), the MD p-value is wildly inaccurate.

**Structural Similar Compounds**

| Name               | s-Triazine, 2,4-dichloro-6-(o-chloroanilino)- | Phenol, 2,2'-(methylenebis(4-chloro-                                                                                                              | Aniline, 2,4-bis(o-methylphenoxy)-                                                                                                                |
|--------------------|-----------------------------------------------|---------------------------------------------------------------------------------------------------------------------------------------------------|---------------------------------------------------------------------------------------------------------------------------------------------------|
| Structure          |                                               |                                                                                                                                                   |                                                                                                                                                   |
| Actual Endpoint    | Irritant                                      | Irritant                                                                                                                                          | Irritant                                                                                                                                          |
| Predicted Endpoint | Non-Irritant                                  | Non-Irritant                                                                                                                                      | Non-Irritant                                                                                                                                      |
| Distance           | 0.639                                         | 0.676                                                                                                                                             | 0.707                                                                                                                                             |
| Reference          | 34ZIAG* -,235,69                              | 85JCAE "Prehled Prumyslove Toxikologie; Organické Latky," Marhold, J., Prague, Czechoslovakia, Avicenum, 1986 Volume(issue)/page/year: -,533,1986 | 85JCAE "Prehled Prumyslove Toxikologie; Organické Latky," Marhold, J., Prague, Czechoslovakia, Avicenum, 1986 Volume(issue)/page/year: -,725,1986 |

**Model Applicability**

Unknown features are fingerprint features in the query molecule, but not found or appearing too infrequently in the training set.

1. All properties and OPS components are within expected ranges.

**Feature Contribution****Top features for positive contribution**

| Fingerprint | Bit/Smiles  | Feature Structure                    | Score  | Irritant in training set |
|-------------|-------------|--------------------------------------|--------|--------------------------|
| FCFP_12     | -1185376954 | <br>F[c]1:[cH]:[cH]:[*]:[cH]:[c]:1Cl | 0.0756 | 6 out of 6               |

|                                        |             |                                                                                                                                         |        |                          |
|----------------------------------------|-------------|-----------------------------------------------------------------------------------------------------------------------------------------|--------|--------------------------|
| FCFP_12                                | -2132756387 | 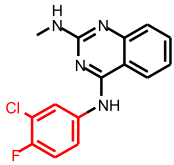<br>[*][c]1:[cH]:[cH]:[c](F):[c](Cl):[cH]:1          | 0.0703 | 4 out of 4               |
| FCFP_12                                | -2050771350 | <br>[*]N[c]1:[cH]:[cH]:[c](F):[c](Cl):[cH]:1         | 0.0583 | 2 out of 2               |
| Top Features for negative contribution |             |                                                                                                                                         |        |                          |
| Fingerprint                            | Bit/Smiles  | Feature Structure                                                                                                                       | Score  | Irritant in training set |
| FCFP_12                                | 839741273   | <br>[*][c]1:[*]:[cH]:[cH]:[c](N[c](:[*]):[*]):[cH]:1 | -0.708 | 4 out of 10              |
| FCFP_12                                | 1294255210  | <br>[*]:[c](:[*])NC                                 | -0.486 | 12 out of 22             |
| FCFP_12                                | 136686699   | <br>[*]NC                                          | -0.484 | 3 out of 6               |

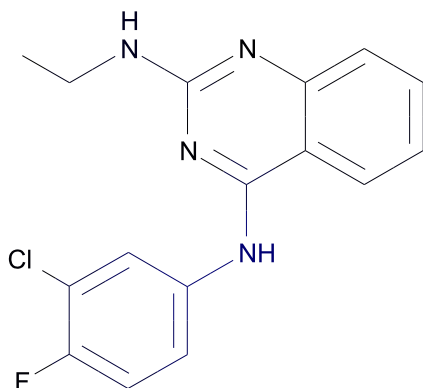

$C_{16}H_{14}ClFN_4$

Molecular Weight: 316.76056

ALogP: 5.025

Rotatable Bonds: 4

Acceptors: 4

Donors: 2

## Model Prediction

Prediction: Non-Irritant

Probability: 0.732

Enrichment: 0.794

Bayesian Score: -3.82

Mahalanobis Distance: 8.93

Mahalanobis Distance p-value: 0.456

Prediction: Positive if the Bayesian score is above the estimated best cutoff value from minimizing the false positive and false negative rate.

Probability: The estimated probability that the sample is in the positive category. This assumes that the Bayesian score follows a normal distribution and is different from the prediction using a cutoff.

Enrichment: An estimate of enrichment, that is, the increased likelihood (versus random) of this sample being in the category.

Bayesian Score: The standard Laplacian-modified Bayesian score.

Mahalanobis Distance: The Mahalanobis distance (MD) is the distance to the center of the training data. The larger the MD, the less trustworthy the prediction.

Mahalanobis Distance p-value: The p-value gives the fraction of training data with an MD greater than or equal to the one for the given sample, assuming normally distributed data. The smaller the p-value, the less trustworthy the prediction. For highly non-normal X properties (e.g., fingerprints), the MD p-value is wildly inaccurate.

## Structural Similar Compounds

| Name               | s-Triazine, 2,4-dichloro-6-(o-chloroanilino)- | Sulfide, bis(4-t-butyl-m-cresyl)-                                                                                                                                               | Aniline, 2,4-bis(o-methylphenoxy)-                                                                                                                 |
|--------------------|-----------------------------------------------|---------------------------------------------------------------------------------------------------------------------------------------------------------------------------------|----------------------------------------------------------------------------------------------------------------------------------------------------|
| Structure          |                                               |                                                                                                                                                                                 |                                                                                                                                                    |
| Actual Endpoint    | Irritant                                      | Irritant                                                                                                                                                                        | Irritant                                                                                                                                           |
| Predicted Endpoint | Non-Irritant                                  | Irritant                                                                                                                                                                        | Non-Irritant                                                                                                                                       |
| Distance           | 0.674                                         | 0.689                                                                                                                                                                           | 0.699                                                                                                                                              |
| Reference          | 34ZIAG* -,235,69                              | AMIHBC AMA Archives of Industrial Hygiene and Occupational Medicine. (Chicago , IL) V.2-10, 1950-54. For publisher information, see AEHLAU. Volume(issue)/page/year: 5,311,1952 | 85JCAE "Prehled Prumyslove Toxikologie; Organické Latky," Marhold, J., Prague , Czechoslovakia, Avicenum, 1986 Volume(issue)/page/year: -,725,1986 |

## Model Applicability

Unknown features are fingerprint features in the query molecule, but not found or appearing too infrequently in the training set.

1. All properties and OPS components are within expected ranges.

## Feature Contribution

### Top features for positive contribution

| Fingerprint | Bit/Smiles  | Feature Structure                                 | Score  | Irritant in training set |
|-------------|-------------|---------------------------------------------------|--------|--------------------------|
| FCFP_12     | -1185376954 | <br><chem>F[c]1:[cH]:[cH]:[*]:[cH]:[c]:1Cl</chem> | 0.0756 | 6 out of 6               |

|                                        |             |                                                                                                                                                       |        |                          |
|----------------------------------------|-------------|-------------------------------------------------------------------------------------------------------------------------------------------------------|--------|--------------------------|
| FCFP_12                                | -2132756387 | 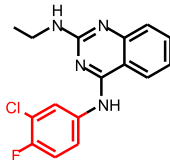<br>[*][c]1:[cH]:[cH]:[c]<br>(F):[c](Cl):[cH]:1                    | 0.0703 | 4 out of 4               |
| FCFP_12                                | -1716224640 | <br>[*][c]1:[*]:[c]([*]):<br>[c]2:[cH]:[*]:[cH]:[<br>cH]:[c]:2:n:1 | 0.0583 | 2 out of 2               |
| Top Features for negative contribution |             |                                                                                                                                                       |        |                          |
| Fingerprint                            | Bit/Smiles  | Feature Structure                                                                                                                                     | Score  | Irritant in training set |
| FCFP_12                                | 839741273   | <br>[*][c]1:[*]:[cH]:[cH]<br>:[c](N[c](:[*]):[*])<br>:[cH]:1       | -0.708 | 4 out of 10              |
| FCFP_12                                | 1294255210  | <br>[*]:[c](:[*])NC                                               | -0.486 | 12 out of 22             |
| FCFP_12                                | -773983804  | <br>[*]N[c]1:[cH]:[*]:[c]<br>([*]):[cH]:[cH]:1                   | -0.444 | 46 out of 79             |

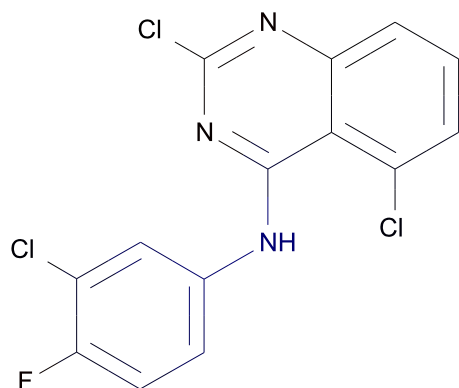

$C_{14}H_7Cl_3FN_3$

Molecular Weight: 342.58288

ALogP: 5.867

Rotatable Bonds: 2

Acceptors: 3

Donors: 1

## Model Prediction

Prediction: Non-Irritant

Probability: 0.926

Enrichment: 1.01

Bayesian Score: -2.4

Mahalanobis Distance: 7.4

Mahalanobis Distance p-value: 0.981

Prediction: Positive if the Bayesian score is above the estimated best cutoff value from minimizing the false positive and false negative rate.

Probability: The estimated probability that the sample is in the positive category. This assumes that the Bayesian score follows a normal distribution and is different from the prediction using a cutoff.

Enrichment: An estimate of enrichment, that is, the increased likelihood (versus random) of this sample being in the category.

Bayesian Score: The standard Laplacian-modified Bayesian score.

Mahalanobis Distance: The Mahalanobis distance (MD) is the distance to the center of the training data. The larger the MD, the less trustworthy the prediction.

Mahalanobis Distance p-value: The p-value gives the fraction of training data with an MD greater than or equal to the one for the given sample, assuming normally distributed data. The smaller the p-value, the less trustworthy the prediction. For highly non-normal X properties (e.g., fingerprints), the MD p-value is wildly inaccurate.

## Structural Similar Compounds

| Name               | Anthraquinone, 1-(2,4,6-trimethylphenylamino)-                                                                                                                                                                      | Aniline, 2,4-bis(o-methylphenoxy)-                                                                                                                   | s-Triazine, 2,4-dichloro-6-(o-chloroanilino)- |
|--------------------|---------------------------------------------------------------------------------------------------------------------------------------------------------------------------------------------------------------------|------------------------------------------------------------------------------------------------------------------------------------------------------|-----------------------------------------------|
| Structure          |                                                                                                                                                                                                                     |                                                                                                                                                      |                                               |
| Actual Endpoint    | Irritant                                                                                                                                                                                                            | Irritant                                                                                                                                             | Irritant                                      |
| Predicted Endpoint | Non-Irritant                                                                                                                                                                                                        | Non-Irritant                                                                                                                                         | Non-Irritant                                  |
| Distance           | 0.513                                                                                                                                                                                                               | 0.610                                                                                                                                                | 0.655                                         |
| Reference          | 28ZPAK "Sbornik Vysledku Toxikologickeho Vysetreni Latek A Pripravku," Marhol d, J.V., Institut Pro Vychovu Vedoucich Pracovniku Chemickeho Prumyclu Praha, Cechoslovakia, 1972<br>Volume(issue)/page/year: -,242,1 | 85JCAE "Prehled Prumyslove Toxikologie; Organické Latky," Marhold, J., Prague, Czechoslovakia, Avicenum, 1986<br>Volume(issue)/page/year: -,725,1986 | 34ZIAG* -,235,69                              |

## Model Applicability

Unknown features are fingerprint features in the query molecule, but not found or appearing too infrequently in the training set.

1. All properties and OPS components are within expected ranges.

## Feature Contribution

### Top features for positive contribution

| Fingerprint | Bit/Smiles | Feature Structure | Score | Irritant in training set |
|-------------|------------|-------------------|-------|--------------------------|
|-------------|------------|-------------------|-------|--------------------------|

|                                        |             |                                                                                                                                                       |        |                          |
|----------------------------------------|-------------|-------------------------------------------------------------------------------------------------------------------------------------------------------|--------|--------------------------|
| FCFP_12                                | -1185376954 | 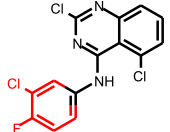<br><chem>F[c]1:[cH]:[cH]:[*]:[cH]:[c]:1Cl</chem>                  | 0.0756 | 6 out of 6               |
| FCFP_12                                | -2069374281 | <br><chem>[*][c]1:[*]:[c](:[*]):n:[c](Cl):n:1</chem>               | 0.0703 | 4 out of 4               |
| FCFP_12                                | -1374842118 | <br><chem>[*]:n:[c](Cl):n:[*]</chem>                               | 0.0703 | 4 out of 4               |
| Top Features for negative contribution |             |                                                                                                                                                       |        |                          |
| Fingerprint                            | Bit/Smiles  | Feature Structure                                                                                                                                     | Score  | Irritant in training set |
| FCFP_12                                | 839741273   | <br><chem>[*][c]1:[*]:[cH]:[cH]:[c](N[c](:[*]):[*]):[cH]:1</chem> | -0.708 | 4 out of 10              |
| FCFP_12                                | -773983804  | <br><chem>[*]N[c]1:[cH]:[*]:[c]([*]):[cH]:[cH]:1</chem>          | -0.444 | 46 out of 79             |

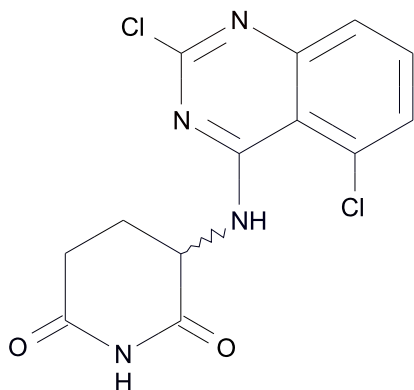

$C_{13}H_{10}Cl_2N_4O_2$

Molecular Weight: 325.15009

ALogP: 2.49

Rotatable Bonds: 2

Acceptors: 5

Donors: 2

## Model Prediction

Prediction: Non-Irritant

Probability: 0.953

Enrichment: 1.03

Bayesian Score: -1.8

Mahalanobis Distance: 8.93

Mahalanobis Distance p-value: 0.459

Prediction: Positive if the Bayesian score is above the estimated best cutoff value from minimizing the false positive and false negative rate.

Probability: The estimated probability that the sample is in the positive category. This assumes that the Bayesian score follows a normal distribution and is different from the prediction using a cutoff.

Enrichment: An estimate of enrichment, that is, the increased likelihood (versus random) of this sample being in the category.

Bayesian Score: The standard Laplacian-modified Bayesian score.

Mahalanobis Distance: The Mahalanobis distance (MD) is the distance to the center of the training data. The larger the MD, the less trustworthy the prediction.

Mahalanobis Distance p-value: The p-value gives the fraction of training data with an MD greater than or equal to the one for the given sample, assuming normally distributed data. The smaller the p-value, the less trustworthy the prediction. For highly non-normal X properties (e.g., fingerprints), the MD p-value is wildly inaccurate.

## Structural Similar Compounds

| Name               | 1-Amino-2-bromo-4-hydroxyanthraquinone | 1-Amino-4-hydroxy-5-chloroanthraquinone | 5-Norbornene-2,3-dicarboxylic acid, 1,4,5,6,7,7-hexachloro-                                                                                       |
|--------------------|----------------------------------------|-----------------------------------------|---------------------------------------------------------------------------------------------------------------------------------------------------|
| Structure          |                                        |                                         |                                                                                                                                                   |
| Actual Endpoint    | Non-Irritant                           | Non-Irritant                            | Irritant                                                                                                                                          |
| Predicted Endpoint | Non-Irritant                           | Non-Irritant                            | Irritant                                                                                                                                          |
| Distance           | 0.590                                  | 0.625                                   | 0.655                                                                                                                                             |
| Reference          | 28ZPAK -,83,72                         | 28ZPAK -,83,72                          | 85JCAE "Prehled Prumyslove Toxikologie; Organické Latky," Marhold, J., Prague, Czechoslovakia, Avicenum, 1986 Volume(issue)/page/year: -,581,1986 |

## Model Applicability

Unknown features are fingerprint features in the query molecule, but not found or appearing too infrequently in the training set.

1. All properties and OPS components are within expected ranges.

## Feature Contribution

### Top features for positive contribution

| Fingerprint | Bit/Smiles | Feature Structure | Score | Irritant in training set |
|-------------|------------|-------------------|-------|--------------------------|
|-------------|------------|-------------------|-------|--------------------------|

|                                        |             |                                                                                                                                                                                              |        |                          |
|----------------------------------------|-------------|----------------------------------------------------------------------------------------------------------------------------------------------------------------------------------------------|--------|--------------------------|
| FCFP_12                                | -2069374281 | 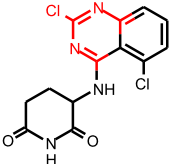<br><chem>[*][c]1:[*]:[c](:[*])</chem><br><chem>:n:[c](Cl):n:1</chem>                                     | 0.0703 | 4 out of 4               |
| FCFP_12                                | -1374842118 | <br><chem>[*]:n:[c](Cl):n:[*]</chem>                                                                      | 0.0703 | 4 out of 4               |
| FCFP_12                                | -1716224640 | <br><chem>[*][c]1:[*]:[c]([*]):</chem><br><chem>[c]2:[cH]:[*]:[cH]:[</chem><br><chem>cH]:[c]:2:n:1</chem> | 0.0583 | 2 out of 2               |
| Top Features for negative contribution |             |                                                                                                                                                                                              |        |                          |
| Fingerprint                            | Bit/Smiles  | Feature Structure                                                                                                                                                                            | Score  | Irritant in training set |
| FCFP_12                                | 1294255210  | <br><chem>[*]:[c](:[*])NC</chem>                                                                         | -0.486 | 12 out of 22             |
| FCFP_12                                | 566058135   | <br><chem>[*]CC(=O)N[*]</chem>                                                                          | -0.367 | 13 out of 21             |
|                                        |             |                                                                                                                                                                                              |        |                          |

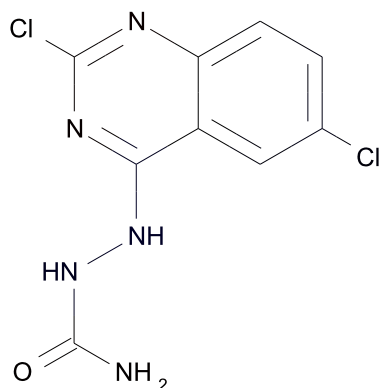

$C_9H_7Cl_2N_5O$

Molecular Weight: 272.09078

ALogP: 2.379

Rotatable Bonds: 2

Acceptors: 4

Donors: 3

## Model Prediction

Prediction: Non-Irritant

Probability: 0.958

Enrichment: 1.04

Bayesian Score: -1.63

Mahalanobis Distance: 6.44

Mahalanobis Distance p-value: 1

Prediction: Positive if the Bayesian score is above the estimated best cutoff value from minimizing the false positive and false negative rate.

Probability: The estimated probability that the sample is in the positive category. This assumes that the Bayesian score follows a normal distribution and is different from the prediction using a cutoff.

Enrichment: An estimate of enrichment, that is, the increased likelihood (versus random) of this sample being in the category. Bayesian Score: The standard Laplacian-modified Bayesian score.

Mahalanobis Distance: The Mahalanobis distance (MD) is the distance to the center of the training data. The larger the MD, the less trustworthy the prediction.

Mahalanobis Distance p-value: The p-value gives the fraction of training data with an MD greater than or equal to the one for the given sample, assuming normally distributed data. The smaller the p-value, the less trustworthy the prediction. For highly non-normal X properties (e.g., fingerprints), the MD p-value is wildly inaccurate.

## Structural Similar Compounds

| Name               | 8-Methylamino-4-hydroxy-2-naphthalene sulfonic acid | Anthraquinone, 1,2,4-trihydroxy- | Phenol, 4,4'-sulfonyldi-                                                                                                                                 |
|--------------------|-----------------------------------------------------|----------------------------------|----------------------------------------------------------------------------------------------------------------------------------------------------------|
| Structure          |                                                     |                                  |                                                                                                                                                          |
| Actual Endpoint    | Non-Irritant                                        | Non-Irritant                     | Irritant                                                                                                                                                 |
| Predicted Endpoint | Non-Irritant                                        | Non-Irritant                     | Non-Irritant                                                                                                                                             |
| Distance           | 0.584                                               | 0.615                            | 0.681                                                                                                                                                    |
| Reference          | 28ZPAK -,190,72                                     | 28ZPAK -,103,72                  | BIOFX* BIOFAX Industrial Bio-Test Laboratories, Inc., Data Sheets. (1810 Fro ntage Rd., Northbrook, IL 60062)<br>Volume(issue)/page/year: 601-05501,1974 |

## Model Applicability

Unknown features are fingerprint features in the query molecule, but not found or appearing too infrequently in the training set.

1. All properties and OPS components are within expected ranges.

## Feature Contribution

### Top features for positive contribution

| Fingerprint | Bit/Smiles  | Feature Structure                                                     | Score  | Irritant in training set |
|-------------|-------------|-----------------------------------------------------------------------|--------|--------------------------|
| FCFP_12     | -2069374281 | <br><chem>[*][c]1:[*]:[c](:[*])</chem><br><chem>:n:[c](Cl):n:1</chem> | 0.0703 | 4 out of 4               |

| FCFP_12                                | -1374842118 | 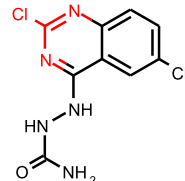<br><chem>[*]:n:[c](Cl):n:[*]</chem>           | 0.0703 | 4 out of 4               |
|----------------------------------------|-------------|-----------------------------------------------------------------------------------------------------------------------------------|--------|--------------------------|
| FCFP_12                                | 1499521844  | <br><chem>[*]NC(=O)N</chem>                    | 0.0658 | 3 out of 3               |
| Top Features for negative contribution |             |                                                                                                                                   |        |                          |
| Fingerprint                            | Bit/Smiles  | Feature Structure                                                                                                                 | Score  | Irritant in training set |
| FCFP_12                                | 1294344583  | <br><chem>[*]NN[c](:[*]):[*]</chem>            | -0.65  | 0 out of 1               |
| FCFP_12                                | 367998008   | <br><chem>[*][c](:[*]):[c](F):[cH]:[*]</chem> | -0.129 | 61 out of 76             |
| FCFP_12                                | 71476542    | <br><chem>[*]:[c](:[*])Cl</chem>             | -0.12  | 64 out of 79             |

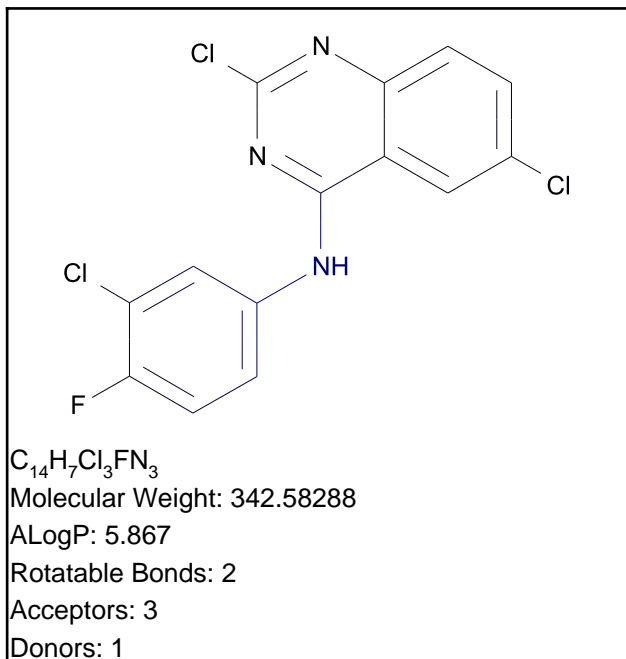

## Model Prediction

Prediction: Non-Irritant

Probability: 0.931

Enrichment: 1.01

Bayesian Score: -2.32

Mahalanobis Distance: 7.4

Mahalanobis Distance p-value: 0.981

Prediction: Positive if the Bayesian score is above the estimated best cutoff value from minimizing the false positive and false negative rate.

Probability: The estimated probability that the sample is in the positive category. This assumes that the Bayesian score follows a normal distribution and is different from the prediction using a cutoff.

Enrichment: An estimate of enrichment, that is, the increased likelihood (versus random) of this sample being in the category.

Bayesian Score: The standard Laplacian-modified Bayesian score.

Mahalanobis Distance: The Mahalanobis distance (MD) is the distance to the center of the training data. The larger the MD, the less trustworthy the prediction.

Mahalanobis Distance p-value: The p-value gives the fraction of training data with an MD greater than or equal to the one for the given sample, assuming normally distributed data. The smaller the p-value, the less trustworthy the prediction. For highly non-normal X properties (e.g., fingerprints), the MD p-value is wildly inaccurate.

## Structural Similar Compounds

| Name               | Anthraquinone, 1-(2,4,6-trimethylphenylamino)-                                                                                                                                                                       | Aniline, 2,4-bis(o-methylphenoxy)-                                                                                                                   | s-Triazine, 2,4-dichloro-6-(o-chloroanilino)-                                       |
|--------------------|----------------------------------------------------------------------------------------------------------------------------------------------------------------------------------------------------------------------|------------------------------------------------------------------------------------------------------------------------------------------------------|-------------------------------------------------------------------------------------|
| Structure          | 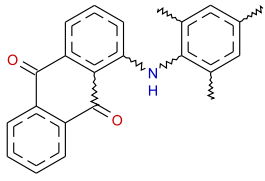                                                                                                                                  |                                                                   |  |
| Actual Endpoint    | Irritant                                                                                                                                                                                                             | Irritant                                                                                                                                             | Irritant                                                                            |
| Predicted Endpoint | Non-Irritant                                                                                                                                                                                                         | Non-Irritant                                                                                                                                         | Non-Irritant                                                                        |
| Distance           | 0.518                                                                                                                                                                                                                | 0.615                                                                                                                                                | 0.664                                                                               |
| Reference          | 28ZPAK "Sbornik Vysledku Toxikologickeho Vysetreni Latek A Pripravku," Marhol d, J.V., Institut Pro Vychovu Vedoucich Pracovniku Chemickeho Prumyclu Praha, Czechoslovakia, 1972<br>Volume(issue)/page/year: -,242,1 | 85JCAE "Prehled Prumyslove Toxikologie; Organické Latky," Marhold, J., Prague, Czechoslovakia, Avicenum, 1986<br>Volume(issue)/page/year: -,725,1986 | 34ZIAG* -,235,69                                                                    |

## Model Applicability

Unknown features are fingerprint features in the query molecule, but not found or appearing too infrequently in the training set.

1. All properties and OPS components are within expected ranges.

## Feature Contribution

| Top features for positive contribution |            |                   |       |                          |
|----------------------------------------|------------|-------------------|-------|--------------------------|
| Fingerprint                            | Bit/Smiles | Feature Structure | Score | Irritant in training set |
|                                        |            |                   |       |                          |

|                                        |             |                                                                                                                                                       |        |                          |
|----------------------------------------|-------------|-------------------------------------------------------------------------------------------------------------------------------------------------------|--------|--------------------------|
| FCFP_12                                | -1185376954 | 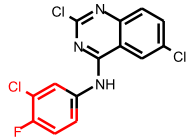<br><chem>F[c]1:[cH]:[cH]:[*]:[cH]:[c]:1Cl</chem>                  | 0.0756 | 6 out of 6               |
| FCFP_12                                | -2069374281 | <br><chem>[*][c]1:[*]:[c](:[*]):n:[c](Cl):n:1</chem>               | 0.0703 | 4 out of 4               |
| FCFP_12                                | -1374842118 | <br><chem>[*]:n:[c](Cl):n:[*]</chem>                               | 0.0703 | 4 out of 4               |
| Top Features for negative contribution |             |                                                                                                                                                       |        |                          |
| Fingerprint                            | Bit/Smiles  | Feature Structure                                                                                                                                     | Score  | Irritant in training set |
| FCFP_12                                | 839741273   | <br><chem>[*][c]1:[*]:[cH]:[cH]:[c](N[c](:[*]):[*]):[cH]:1</chem> | -0.708 | 4 out of 10              |
| FCFP_12                                | -773983804  | <br><chem>[*]N[c]1:[cH]:[*]:[c]([*]):[cH]:[cH]:1</chem>          | -0.444 | 46 out of 79             |

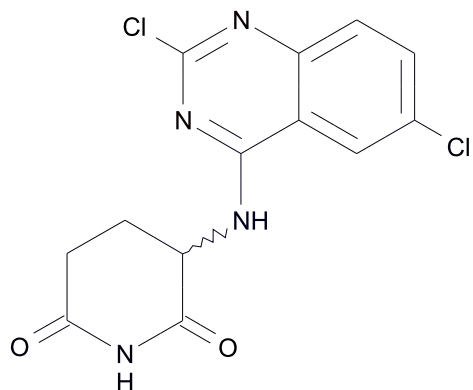

$C_{13}H_{10}Cl_2N_4O_2$

Molecular Weight: 325.15009

ALogP: 2.49

Rotatable Bonds: 2

Acceptors: 5

Donors: 2

## Model Prediction

Prediction: Non-Irritant

Probability: 0.955

Enrichment: 1.04

Bayesian Score: -1.72

Mahalanobis Distance: 8.93

Mahalanobis Distance p-value: 0.459

Prediction: Positive if the Bayesian score is above the estimated best cutoff value from minimizing the false positive and false negative rate.

Probability: The estimated probability that the sample is in the positive category. This assumes that the Bayesian score follows a normal distribution and is different from the prediction using a cutoff.

Enrichment: An estimate of enrichment, that is, the increased likelihood (versus random) of this sample being in the category.

Bayesian Score: The standard Laplacian-modified Bayesian score.

Mahalanobis Distance: The Mahalanobis distance (MD) is the distance to the center of the training data. The larger the MD, the less trustworthy the prediction.

Mahalanobis Distance p-value: The p-value gives the fraction of training data with an MD greater than or equal to the one for the given sample, assuming normally distributed data. The smaller the p-value, the less trustworthy the prediction. For highly non-normal X properties (e.g., fingerprints), the MD p-value is wildly inaccurate.

## Structural Similar Compounds

| Name               | 1-Amino-2-bromo-4-hydroxyanthraquinone | 1-Amino-4-hydroxy-5-chloroanthraquinone | 5-Norbornene-2,3-dicarboxylic acid, 1,4,5,6,7,7-hexachloro-                                                                                       |
|--------------------|----------------------------------------|-----------------------------------------|---------------------------------------------------------------------------------------------------------------------------------------------------|
| Structure          |                                        |                                         |                                                                                                                                                   |
| Actual Endpoint    | Non-Irritant                           | Non-Irritant                            | Irritant                                                                                                                                          |
| Predicted Endpoint | Non-Irritant                           | Non-Irritant                            | Irritant                                                                                                                                          |
| Distance           | 0.596                                  | 0.631                                   | 0.655                                                                                                                                             |
| Reference          | 28ZPAK -,83,72                         | 28ZPAK -,83,72                          | 85JCAE "Prehled Prumyslove Toxikologie; Organické Latky," Marhold, J., Prague, Czechoslovakia, Avicenum, 1986 Volume(issue)/page/year: -,581,1986 |

## Model Applicability

Unknown features are fingerprint features in the query molecule, but not found or appearing too infrequently in the training set.

1. All properties and OPS components are within expected ranges.

## Feature Contribution

### Top features for positive contribution

| Fingerprint | Bit/Smiles | Feature Structure | Score | Irritant in training set |
|-------------|------------|-------------------|-------|--------------------------|
|-------------|------------|-------------------|-------|--------------------------|

|         |             |                                                                                                                                              |        |            |
|---------|-------------|----------------------------------------------------------------------------------------------------------------------------------------------|--------|------------|
| FCFP_12 | -1374842118 | 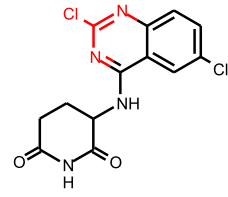<br><chem>[*]:n:[c](Cl):n:[*]</chem>                      | 0.0703 | 4 out of 4 |
| FCFP_12 | -2069374281 | <br><chem>[*][c]1:[*]:[c](:[*])<br/>:n:[c](Cl):n:1</chem> | 0.0703 | 4 out of 4 |
| FCFP_12 | -922480536  | <br><chem>[*]=C1[*]CCC(=O)N1</chem>                       | 0.0583 | 2 out of 2 |

### Top Features for negative contribution

| Fingerprint | Bit/Smiles | Feature Structure                                                                                                    | Score  | Irritant in training set |
|-------------|------------|----------------------------------------------------------------------------------------------------------------------|--------|--------------------------|
| FCFP_12     | 1294255210 | 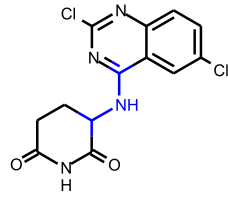<br><chem>[*]:[c](:[*])NC</chem> | -0.486 | 12 out of 22             |
| FCFP_12     | 566058135  | <br><chem>[*]CC(=O)N[*]</chem>  | -0.367 | 13 out of 21             |

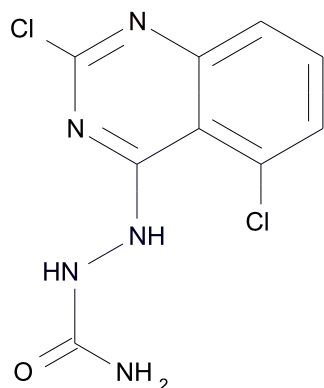

$C_9H_7Cl_2N_5O$

Molecular Weight: 272.09077

ALogP: 2.379

Rotatable Bonds: 2

Acceptors: 4

Donors: 3

## Model Prediction

Prediction: Non-Irritant

Probability: 0.955

Enrichment: 1.04

Bayesian Score: -1.71

Mahalanobis Distance: 6.44

Mahalanobis Distance p-value: 1

Prediction: Positive if the Bayesian score is above the estimated best cutoff value from minimizing the false positive and false negative rate.

Probability: The estimated probability that the sample is in the positive category. This assumes that the Bayesian score follows a normal distribution and is different from the prediction using a cutoff.

Enrichment: An estimate of enrichment, that is, the increased likelihood (versus random) of this sample being in the category.

Bayesian Score: The standard Laplacian-modified Bayesian score.

Mahalanobis Distance: The Mahalanobis distance (MD) is the distance to the center of the training data. The larger the MD, the less trustworthy the prediction.

Mahalanobis Distance p-value: The p-value gives the fraction of training data with an MD greater than or equal to the one for the given sample, assuming normally distributed data. The smaller the p-value, the less trustworthy the prediction. For highly non-normal X properties (e.g., fingerprints), the MD p-value is wildly inaccurate.

## Structural Similar Compounds

| Name               | 8-Methylamino-4-hydroxy-2-naphthalene sulfonic acid | Anthraquinone, 1,2,4-trihydroxy- | 1-Amino-4-hydroxy-5-chloroanthraquinone |
|--------------------|-----------------------------------------------------|----------------------------------|-----------------------------------------|
| Structure          |                                                     |                                  |                                         |
| Actual Endpoint    | Non-Irritant                                        | Non-Irritant                     | Non-Irritant                            |
| Predicted Endpoint | Non-Irritant                                        | Non-Irritant                     | Non-Irritant                            |
| Distance           | 0.577                                               | 0.608                            | 0.680                                   |
| Reference          | 28ZPAK -,190,72                                     | 28ZPAK -,103,72                  | 28ZPAK -,83,72                          |

## Model Applicability

Unknown features are fingerprint features in the query molecule, but not found or appearing too infrequently in the training set.

1. All properties and OPS components are within expected ranges.

## Feature Contribution

### Top features for positive contribution

| Fingerprint | Bit/Smiles  | Feature Structure                    | Score  | Irritant in training set |
|-------------|-------------|--------------------------------------|--------|--------------------------|
| FCFP_12     | -1374842118 | <br><chem>[*]:n:[c](Cl):n:[*]</chem> | 0.0703 | 4 out of 4               |

|                                        |             |                                                                                                                                            |        |                          |
|----------------------------------------|-------------|--------------------------------------------------------------------------------------------------------------------------------------------|--------|--------------------------|
| FCFP_12                                | -2069374281 | 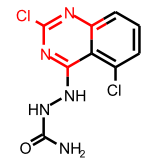<br><chem>*[c]1:[*]:[c](:[*])<br/>:n:[c](Cl):n:1</chem> | 0.0703 | 4 out of 4               |
| FCFP_12                                | 1499521844  | <br><chem>*]NC(=O)N</chem>                              | 0.0658 | 3 out of 3               |
| Top Features for negative contribution |             |                                                                                                                                            |        |                          |
| Fingerprint                            | Bit/Smiles  | Feature Structure                                                                                                                          | Score  | Irritant in training set |
| FCFP_12                                | 1294344583  | <br><chem>*]NN[c](:[*]):[*]</chem>                      | -0.65  | 0 out of 1               |
| FCFP_12                                | 367998008   | <br><chem>*][c](:[*]):[c](F):[cH]:[*]</chem>           | -0.129 | 61 out of 76             |
| FCFP_12                                | 71476542    | <br><chem>*]:[c](:[*])Cl</chem>                       | -0.12  | 64 out of 79             |

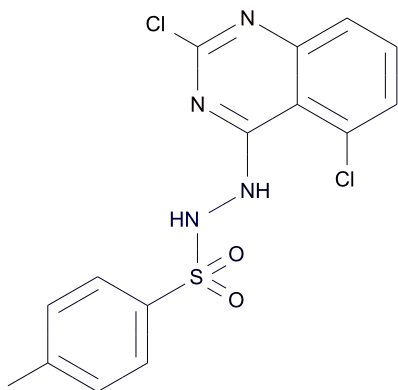

$C_{15}H_{12}Cl_2N_4O_2S$

Molecular Weight: 383.25237

ALogP: 4.443

Rotatable Bonds: 4

Acceptors: 5

Donors: 2

## Model Prediction

Prediction: Non-Irritant

Probability: 0.927

Enrichment: 1.01

Bayesian Score: -2.38

Mahalanobis Distance: 6.03

Mahalanobis Distance p-value: 1

Prediction: Positive if the Bayesian score is above the estimated best cutoff value from minimizing the false positive and false negative rate.

Probability: The estimated probability that the sample is in the positive category. This assumes that the Bayesian score follows a normal distribution and is different from the prediction using a cutoff.

Enrichment: An estimate of enrichment, that is, the increased likelihood (versus random) of this sample being in the category. Bayesian Score: The standard Laplacian-modified Bayesian score.

Mahalanobis Distance: The Mahalanobis distance (MD) is the distance to the center of the training data. The larger the MD, the less trustworthy the prediction.

Mahalanobis Distance p-value: The p-value gives the fraction of training data with an MD greater than or equal to the one for the given sample, assuming normally distributed data. The smaller the p-value, the less trustworthy the prediction. For highly non-normal X properties (e.g., fingerprints), the MD p-value is wildly inaccurate.

## Structural Similar Compounds

| Name               | 5-Norbornene-2,3-dicarboxylic acid, 1,4,5,6,7,7-hexachloro-                                                                                       | Anthraquinone, 1,1'-iminodi-                                                                                                                      | 1-Amino-2-bromo-4-hydroxyanthraquinone |
|--------------------|---------------------------------------------------------------------------------------------------------------------------------------------------|---------------------------------------------------------------------------------------------------------------------------------------------------|----------------------------------------|
| Structure          |                                                                                                                                                   |                                                                                                                                                   |                                        |
| Actual Endpoint    | Irritant                                                                                                                                          | Irritant                                                                                                                                          | Non-Irritant                           |
| Predicted Endpoint | Irritant                                                                                                                                          | Non-Irritant                                                                                                                                      | Non-Irritant                           |
| Distance           | 0.722                                                                                                                                             | 0.734                                                                                                                                             | 0.755                                  |
| Reference          | 85JCAE "Prehled Prumyslove Toxikologie; Organické Latky," Marhold, J., Prague, Czechoslovakia, Avicenum, 1986 Volume(issue)/page/year: -,581,1986 | 85JCAE "Prehled Prumyslove Toxikologie; Organické Latky," Marhold, J., Prague, Czechoslovakia, Avicenum, 1986 Volume(issue)/page/year: -,735,1986 | 28ZPAK -,83,72                         |

## Model Applicability

Unknown features are fingerprint features in the query molecule, but not found or appearing too infrequently in the training set.

1. All properties and OPS components are within expected ranges.

## Feature Contribution

### Top features for positive contribution

| Fingerprint | Bit/Smiles | Feature Structure | Score | Irritant in training set |
|-------------|------------|-------------------|-------|--------------------------|
|-------------|------------|-------------------|-------|--------------------------|

|                                        |             |                                                                                                                                                            |        |                          |
|----------------------------------------|-------------|------------------------------------------------------------------------------------------------------------------------------------------------------------|--------|--------------------------|
| FCFP_12                                | -2069374281 | 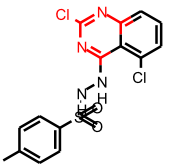<br><chem>[*][c]1:[*]:[c]([*]):n:[c](Cl):n:1</chem>                     | 0.0703 | 4 out of 4               |
| FCFP_12                                | -1374842118 | <br><chem>[*]:n:[c](Cl):n:[*]</chem>                                    | 0.0703 | 4 out of 4               |
| FCFP_12                                | -1716224640 | <br><chem>[*][c]1:[*]:[c]([*]):[c]2:[cH]:[*]:[cH]:[cH]:[c]:2:n:1</chem> | 0.0583 | 2 out of 2               |
| Top Features for negative contribution |             |                                                                                                                                                            |        |                          |
| Fingerprint                            | Bit/Smiles  | Feature Structure                                                                                                                                          | Score  | Irritant in training set |
| FCFP_12                                | 1294344583  | <br><chem>[*]NN[c]([*]):[*]</chem>                                     | -0.65  | 0 out of 1               |
| FCFP_12                                | 1789442672  | <br><chem>[*]NS(=O)(=O)[c]1:[cH]:[cH]:[c](C):[cH]:[cH]:1</chem>       | -0.347 | 1 out of 2               |

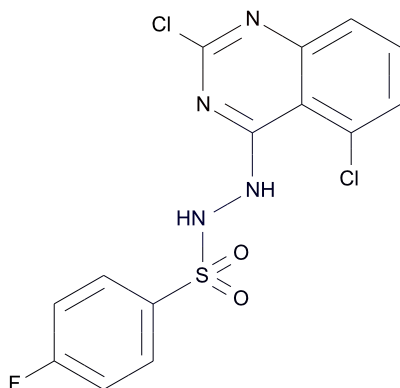

$C_{14}H_9Cl_2FN_4O_2S$

Molecular Weight: 387.21626

ALogP: 4.162

Rotatable Bonds: 4

Acceptors: 5

Donors: 2

## Model Prediction

Prediction: Non-Irritant

Probability: 0.942

Enrichment: 1.02

Bayesian Score: -2.09

Mahalanobis Distance: 5.98

Mahalanobis Distance p-value: 1

Prediction: Positive if the Bayesian score is above the estimated best cutoff value from minimizing the false positive and false negative rate.

Probability: The estimated probability that the sample is in the positive category. This assumes that the Bayesian score follows a normal distribution and is different from the prediction using a cutoff.

Enrichment: An estimate of enrichment, that is, the increased likelihood (versus random) of this sample being in the category. Bayesian Score: The standard Laplacian-modified Bayesian score.

Mahalanobis Distance: The Mahalanobis distance (MD) is the distance to the center of the training data. The larger the MD, the less trustworthy the prediction.

Mahalanobis Distance p-value: The p-value gives the fraction of training data with an MD greater than or equal to the one for the given sample, assuming normally distributed data. The smaller the p-value, the less trustworthy the prediction. For highly non-normal X properties (e.g., fingerprints), the MD p-value is wildly inaccurate.

## Structural Similar Compounds

| Name               | 5-Norbornene-2,3-dicarboxylic acid, 1,4,5,6,7,7-hexachloro-                                                                                       | 1-Amino-2-bromo-4-hydroxyanthraquinone | Anthraquinone, 1,1'-iminodi-                                                                                                                      |
|--------------------|---------------------------------------------------------------------------------------------------------------------------------------------------|----------------------------------------|---------------------------------------------------------------------------------------------------------------------------------------------------|
| Structure          |                                                                                                                                                   |                                        |                                                                                                                                                   |
| Actual Endpoint    | Irritant                                                                                                                                          | Non-Irritant                           | Irritant                                                                                                                                          |
| Predicted Endpoint | Irritant                                                                                                                                          | Non-Irritant                           | Non-Irritant                                                                                                                                      |
| Distance           | 0.704                                                                                                                                             | 0.743                                  | 0.744                                                                                                                                             |
| Reference          | 85JCAE "Prehled Prumyslove Toxikologie; Organické Latky," Marhold, J., Prague, Czechoslovakia, Avicenum, 1986 Volume(issue)/page/year: -,581,1986 | 28ZPAK -,83,72                         | 85JCAE "Prehled Prumyslove Toxikologie; Organické Latky," Marhold, J., Prague, Czechoslovakia, Avicenum, 1986 Volume(issue)/page/year: -,735,1986 |

## Model Applicability

Unknown features are fingerprint features in the query molecule, but not found or appearing too infrequently in the training set.

1. All properties and OPS components are within expected ranges.

## Feature Contribution

### Top features for positive contribution

| Fingerprint | Bit/Smiles | Feature Structure | Score | Irritant in training set |
|-------------|------------|-------------------|-------|--------------------------|
|-------------|------------|-------------------|-------|--------------------------|

|                                        |             |                                                                                                                                                       |        |                          |
|----------------------------------------|-------------|-------------------------------------------------------------------------------------------------------------------------------------------------------|--------|--------------------------|
| FCFP_12                                | -1374842118 | 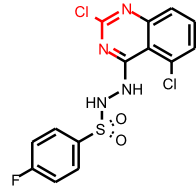<br><chem>[*]:n:[c](Cl):n:[*]</chem>                               | 0.0703 | 4 out of 4               |
| FCFP_12                                | -149636017  | <br><chem>[*]S(=[*])(=[*])[c]1:[cH]:[cH]:[c](F):[cH]:[cH]:1</chem> | 0.0703 | 4 out of 4               |
| FCFP_12                                | -2069374281 | <br><chem>[*][c]1:[*]:[c](:[*]):n:[c](Cl):n:1</chem>               | 0.0703 | 4 out of 4               |
| Top Features for negative contribution |             |                                                                                                                                                       |        |                          |
| Fingerprint                            | Bit/Smiles  | Feature Structure                                                                                                                                     | Score  | Irritant in training set |
| FCFP_12                                | 1294344583  | <br><chem>[*]NN[c](:[*]):[*]</chem>                               | -0.65  | 0 out of 1               |
| FCFP_12                                | -1096219292 | <br><chem>[*]NS(=O)(=O)[c](:[*]):[*]</chem>                      | -0.229 | 26 out of 36             |

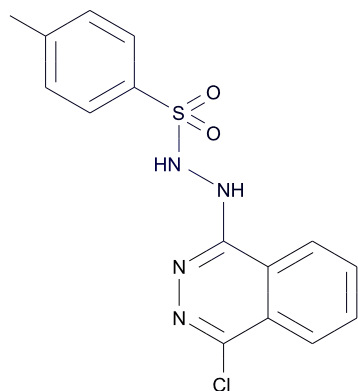

$C_{15}H_{13}ClN_4O_2S$

Molecular Weight: 348.80731

ALogP: 3.529

Rotatable Bonds: 4

Acceptors: 5

Donors: 2

## Model Prediction

Prediction: Non-Irritant

Probability: 0.916

Enrichment: 0.995

Bayesian Score: -2.55

Mahalanobis Distance: 6

Mahalanobis Distance p-value: 1

Prediction: Positive if the Bayesian score is above the estimated best cutoff value from minimizing the false positive and false negative rate.

Probability: The estimated probability that the sample is in the positive category. This assumes that the Bayesian score follows a normal distribution and is different from the prediction using a cutoff.

Enrichment: An estimate of enrichment, that is, the increased likelihood (versus random) of this sample being in the category.

Bayesian Score: The standard Laplacian-modified Bayesian score.

Mahalanobis Distance: The Mahalanobis distance (MD) is the distance to the center of the training data. The larger the MD, the less trustworthy the prediction.

Mahalanobis Distance p-value: The p-value gives the fraction of training data with an MD greater than or equal to the one for the given sample, assuming normally distributed data. The smaller the p-value, the less trustworthy the prediction. For highly non-normal X properties (e.g., fingerprints), the MD p-value is wildly inaccurate.

## Structural Similar Compounds

| Name               | 1-Amino-2-bromo-4-hydroxyanthraquinone | 5-Norbornene-2,3-dicarboxylic acid, 1,4,5,6,7,7-hexachloro-                                                                                       | 1-Amino-4-hydroxy-5-chloroanthraquinone |
|--------------------|----------------------------------------|---------------------------------------------------------------------------------------------------------------------------------------------------|-----------------------------------------|
| Structure          |                                        |                                                                                                                                                   |                                         |
| Actual Endpoint    | Non-Irritant                           | Irritant                                                                                                                                          | Non-Irritant                            |
| Predicted Endpoint | Non-Irritant                           | Irritant                                                                                                                                          | Non-Irritant                            |
| Distance           | 0.687                                  | 0.688                                                                                                                                             | 0.732                                   |
| Reference          | 28ZPAK -,83,72                         | 85JCAE "Prehled Prumyslove Toxikologie; Organické Latky," Marhold, J., Prague, Czechoslovakia, Avicenum, 1986 Volume(issue)/page/year: -,581,1986 | 28ZPAK -,83,72                          |

## Model Applicability

Unknown features are fingerprint features in the query molecule, but not found or appearing too infrequently in the training set.

1. All properties and OPS components are within expected ranges.

## Feature Contribution

### Top features for positive contribution

| Fingerprint | Bit/Smiles | Feature Structure | Score | Irritant in training set |
|-------------|------------|-------------------|-------|--------------------------|
|             |            |                   |       |                          |

|                                        |             |                                                                                                                                                             |        |                          |
|----------------------------------------|-------------|-------------------------------------------------------------------------------------------------------------------------------------------------------------|--------|--------------------------|
| FCFP_12                                | 4427049     | 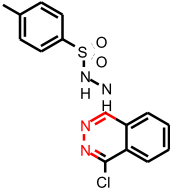<br><chem>[*][c](:[*]):n:n:[*]</chem>                                    | 0.0734 | 5 out of 5               |
| Top Features for negative contribution |             |                                                                                                                                                             |        |                          |
| Fingerprint                            | Bit/Smiles  | Feature Structure                                                                                                                                           | Score  | Irritant in training set |
| FCFP_12                                | 1294344583  | <br><chem>[*]NN[c](:[*]):[*]</chem>                                      | -0.65  | 0 out of 1               |
| FCFP_12                                | 1789442672  | <br><chem>[*]NS(=O)(=O)[c]1:[cH]         :[cH]:[c](C):[cH]:[cH]:1</chem> | -0.347 | 1 out of 2               |
| FCFP_12                                | -1096219292 | <br><chem>[*]NS(=O)(=O)[c](:[*])         ):[*]</chem>                   | -0.229 | 26 out of 36             |

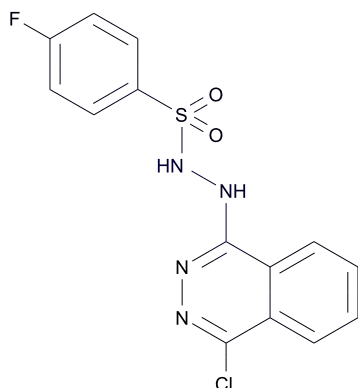

$C_{14}H_{10}ClFN_4O_2S$

Molecular Weight: 352.7712

ALogP: 3.248

Rotatable Bonds: 4

Acceptors: 5

Donors: 2

## Model Prediction

Prediction: Non-Irritant

Probability: 0.922

Enrichment: 1

Bayesian Score: -2.47

Mahalanobis Distance: 5.97

Mahalanobis Distance p-value: 1

Prediction: Positive if the Bayesian score is above the estimated best cutoff value from minimizing the false positive and false negative rate.

Probability: The estimated probability that the sample is in the positive category. This assumes that the Bayesian score follows a normal distribution and is different from the prediction using a cutoff.

Enrichment: An estimate of enrichment, that is, the increased likelihood (versus random) of this sample being in the category. Bayesian Score: The standard Laplacian-modified Bayesian score.

Mahalanobis Distance: The Mahalanobis distance (MD) is the distance to the center of the training data. The larger the MD, the less trustworthy the prediction.

Mahalanobis Distance p-value: The p-value gives the fraction of training data with an MD greater than or equal to the one for the given sample, assuming normally distributed data. The smaller the p-value, the less trustworthy the prediction. For highly non-normal X properties (e.g., fingerprints), the MD p-value is wildly inaccurate.

## Structural Similar Compounds

| Name               | 1-Amino-2-bromo-4-hydroxyanthraquinone | 5-Norbornene-2,3-dicarboxylic acid, 1,4,5,6,7,7-hexachloro-                                                                                       | 1-Amino-4-hydroxy-5-chloroanthraquinone |
|--------------------|----------------------------------------|---------------------------------------------------------------------------------------------------------------------------------------------------|-----------------------------------------|
| Structure          |                                        |                                                                                                                                                   |                                         |
| Actual Endpoint    | Non-Irritant                           | Irritant                                                                                                                                          | Non-Irritant                            |
| Predicted Endpoint | Non-Irritant                           | Irritant                                                                                                                                          | Non-Irritant                            |
| Distance           | 0.674                                  | 0.679                                                                                                                                             | 0.717                                   |
| Reference          | 28ZPAK -,83,72                         | 85JCAE "Prehled Prumyslove Toxikologie; Organické Latky," Marhold, J., Prague, Czechoslovakia, Avicenum, 1986 Volume(issue)/page/year: -,581,1986 | 28ZPAK -,83,72                          |

## Model Applicability

Unknown features are fingerprint features in the query molecule, but not found or appearing too infrequently in the training set.

1. All properties and OPS components are within expected ranges.

## Feature Contribution

### Top features for positive contribution

| Fingerprint | Bit/Smiles | Feature Structure | Score | Irritant in training set |
|-------------|------------|-------------------|-------|--------------------------|
|-------------|------------|-------------------|-------|--------------------------|

|                                        |             |                                                                                                                                                   |        |                          |
|----------------------------------------|-------------|---------------------------------------------------------------------------------------------------------------------------------------------------|--------|--------------------------|
| FCFP_12                                | 4427049     | 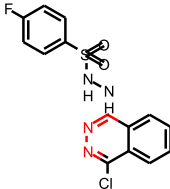<br>[*][c](:[*]):n:n:[*]                                       | 0.0734 | 5 out of 5               |
| FCFP_12                                | -149636017  | <br>[*]S(=[*])(=[*])[c]1:<br>[cH]:[cH]:[c](F):[cH]<br>]:[cH]:1 | 0.0703 | 4 out of 4               |
| Top Features for negative contribution |             |                                                                                                                                                   |        |                          |
| Fingerprint                            | Bit/Smiles  | Feature Structure                                                                                                                                 | Score  | Irritant in training set |
| FCFP_12                                | 1294344583  | <br>[*]NN[c](:[*]):[*]                                         | -0.65  | 0 out of 1               |
| FCFP_12                                | -1096219292 | <br>[*]NS(=O)(=O)[c](:[*])<br>):[*]                           | -0.229 | 26 out of 36             |
| FCFP_12                                | 367998008   | <br>[*][c](:[*]):[c](F):[cH]:[*]                             | -0.129 | 61 out of 76             |

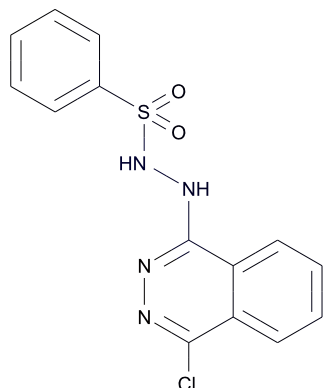

$C_{14}H_{11}ClN_4O_2S$

Molecular Weight: 334.78073

ALogP: 3.043

Rotatable Bonds: 4

Acceptors: 5

Donors: 2

## Model Prediction

Prediction: Non-Irritant

Probability: 0.94

Enrichment: 1.02

Bayesian Score: -2.14

Mahalanobis Distance: 6

Mahalanobis Distance p-value: 1

Prediction: Positive if the Bayesian score is above the estimated best cutoff value from minimizing the false positive and false negative rate.

Probability: The estimated probability that the sample is in the positive category. This assumes that the Bayesian score follows a normal distribution and is different from the prediction using a cutoff.

Enrichment: An estimate of enrichment, that is, the increased likelihood (versus random) of this sample being in the category. Bayesian Score: The standard Laplacian-modified Bayesian score.

Mahalanobis Distance: The Mahalanobis distance (MD) is the distance to the center of the training data. The larger the MD, the less trustworthy the prediction.

Mahalanobis Distance p-value: The p-value gives the fraction of training data with an MD greater than or equal to the one for the given sample, assuming normally distributed data. The smaller the p-value, the less trustworthy the prediction. For highly non-normal X properties (e.g., fingerprints), the MD p-value is wildly inaccurate.

## Structural Similar Compounds

| Name               | 1-Amino-2-bromo-4-hydroxyanthraquinone | 5-Norbornene-2,3-dicarboxylic acid, 1,4,5,6,7,7-hexachloro-                                                                                       | Phenol, 4,4'-sulfonyldi-                                                                                                                              |
|--------------------|----------------------------------------|---------------------------------------------------------------------------------------------------------------------------------------------------|-------------------------------------------------------------------------------------------------------------------------------------------------------|
| Structure          |                                        |                                                                                                                                                   |                                                                                                                                                       |
| Actual Endpoint    | Non-Irritant                           | Irritant                                                                                                                                          | Irritant                                                                                                                                              |
| Predicted Endpoint | Non-Irritant                           | Irritant                                                                                                                                          | Non-Irritant                                                                                                                                          |
| Distance           | 0.655                                  | 0.693                                                                                                                                             | 0.694                                                                                                                                                 |
| Reference          | 28ZPAK -,83,72                         | 85JCAE "Prehled Prumyslove Toxikologie; Organické Latky," Marhold, J., Prague, Czechoslovakia, Avicenum, 1986 Volume(issue)/page/year: -,581,1986 | BIOFX* BIOFAX Industrial Bio-Test Laboratories, Inc., Data Sheets. (1810 Fro ntage Rd., Northbrook, IL 60062) Volume(issue)/page/year: 601-05501,1974 |

## Model Applicability

Unknown features are fingerprint features in the query molecule, but not found or appearing too infrequently in the training set.

1. All properties and OPS components are within expected ranges.

## Feature Contribution

### Top features for positive contribution

| Fingerprint | Bit/Smiles | Feature Structure | Score | Irritant in training set |
|-------------|------------|-------------------|-------|--------------------------|
|             |            |                   |       |                          |

|                                        |             |                                                                                                                                             |        |                          |
|----------------------------------------|-------------|---------------------------------------------------------------------------------------------------------------------------------------------|--------|--------------------------|
| FCFP_12                                | 4427049     | 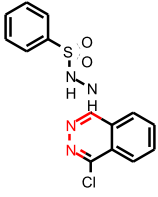<br><chem>[*][c](:[*]):n:n:[*]</chem>                    | 0.0734 | 5 out of 5               |
| FCFP_12                                | -1089199451 | <br><chem>[*]NS(=O)(=O)[c]1:[cH]:[cH]:[cH]:[cH]:1</chem> | 0.0658 | 3 out of 3               |
| Top Features for negative contribution |             |                                                                                                                                             |        |                          |
| Fingerprint                            | Bit/Smiles  | Feature Structure                                                                                                                           | Score  | Irritant in training set |
| FCFP_12                                | 1294344583  | <br><chem>[*]NN[c](:[*]):[*]</chem>                      | -0.65  | 0 out of 1               |
| FCFP_12                                | -1096219292 | <br><chem>[*]NS(=O)(=O)[c](:[*]):[*]</chem>             | -0.229 | 26 out of 36             |
| FCFP_12                                | 71476542    | <br><chem>[*]:[c](:[*])Cl</chem>                       | -0.12  | 64 out of 79             |

# Thalidomide

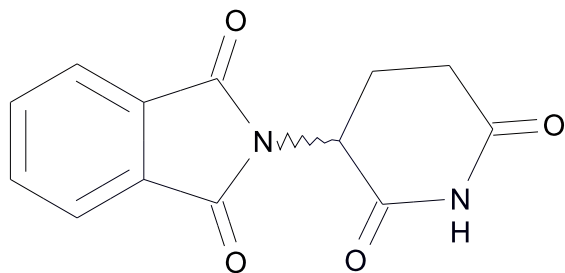

C<sub>13</sub>H<sub>10</sub>N<sub>2</sub>O<sub>4</sub>

Molecular Weight: 258.22949

ALogP: 9.7e-002

Rotatable Bonds: 1

Acceptors: 4

Donors: 1

## Model Prediction

Prediction: Non-Irritant

Probability: 0.964

Enrichment: 1.05

Bayesian Score: -1.37

Mahalanobis Distance: 11.6

Mahalanobis Distance p-value: 0.000214

Prediction: Positive if the Bayesian score is above the estimated best cutoff value from minimizing the false positive and false negative rate.

Probability: The estimated probability that the sample is in the positive category. This assumes that the Bayesian score follows a normal distribution and is different from the prediction using a cutoff.

Enrichment: An estimate of enrichment, that is, the increased likelihood (versus random) of this sample being in the category.

Bayesian Score: The standard Laplacian-modified Bayesian score.

Mahalanobis Distance: The Mahalanobis distance (MD) is the distance to the center of the training data. The larger the MD, the less trustworthy the prediction.

Mahalanobis Distance p-value: The p-value gives the fraction of training data with an MD greater than or equal to the one for the given sample, assuming normally distributed data. The smaller the p-value, the less trustworthy the prediction. For highly non-normal X properties (e.g., fingerprints), the MD p-value is wildly inaccurate.

# TOPKAT\_Skin\_Irritancy\_None\_vs\_Irritant

## Structural Similar Compounds

| Name               | 1-Methylsulfonyl-2-pipecoline | 1-(ethylsulfonyl)-4-pipecoline | p-Acetophenetidine, 3'-nitro- |
|--------------------|-------------------------------|--------------------------------|-------------------------------|
| Structure          |                               |                                |                               |
| Actual Endpoint    | Non-Irritant                  | Non-Irritant                   | Non-Irritant                  |
| Predicted Endpoint | Non-Irritant                  | Non-Irritant                   | Non-Irritant                  |
| Distance           | 0.591                         | 0.592                          | 0.627                         |
| Reference          | US ARMY                       | US ARMY                        | 28ZPAK -,115,72               |

## Model Applicability

Unknown features are fingerprint features in the query molecule, but not found or appearing too infrequently in the training set.

1. All properties and OPS components are within expected ranges.

## Feature Contribution

### Top features for positive contribution

| Fingerprint | Bit/Smiles | Feature Structure                                            | Score | Irritant in training set |
|-------------|------------|--------------------------------------------------------------|-------|--------------------------|
| FCFP_12     | 2139882011 | <br><chem>[*]N1C(=*)[c]2:[cH]:[*]:[cH]:[cH]:[c]:2C1=O</chem> | 0.081 | 11 out of 11             |

| FCFP_12                                | 1393189956 | 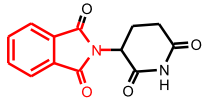<br><chem>[*]N1C(=[*])[c]2:[cH]:[cH]:[cH]:[cH]:[c]:2C1=O</chem> | 0.081   | 11 out of 11             |
|----------------------------------------|------------|----------------------------------------------------------------------------------------------------------------------------------------------------|---------|--------------------------|
| FCFP_12                                | -922480536 | <br><chem>[*]=C1[*]CCC(=O)N1</chem>                             | 0.0583  | 2 out of 2               |
| Top Features for negative contribution |            |                                                                                                                                                    |         |                          |
| Fingerprint                            | Bit/Smiles | Feature Structure                                                                                                                                  | Score   | Irritant in training set |
| FCFP_12                                | 566058135  | <br><chem>[*]CC(=O)N[*]</chem>                                  | -0.367  | 13 out of 21             |
| FCFP_12                                | 392594677  | <br><chem>[*]C([*])N1C(=[*])[c]([*])[c]([cH]:[*])C1=O</chem>   | -0.207  | 8 out of 11              |
| FCFP_12                                | 1618154665 | <br><chem>[*]:[cH]:[cH]:[cH]:[*]</chem>                       | -0.0845 | 412 out of 490           |

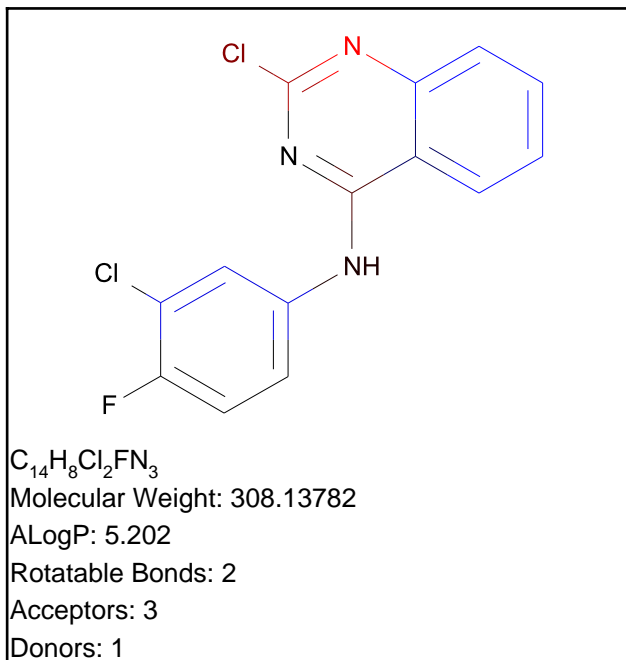

### Model Prediction

Prediction: 10.9

Unit: mg/kg\_body\_weight/day

Mahalanobis Distance: 10.5

Mahalanobis Distance p-value: 0.0088

Mahalanobis Distance: The Mahalanobis distance (MD) is a generalization of the Euclidean distance that accounts for correlations among the X properties. It is calculated as the distance to the center of the training data. The larger the MD, the less trustworthy the prediction.

Mahalanobis Distance p-value: The p-value gives the fraction of training data with an MD greater than or equal to the one for the given sample, assuming normally distributed data. The smaller the p-value, the less trustworthy the prediction. For highly non-normal X properties (e.g., fingerprints), the MD p-value is wildly inaccurate.

### Structural Similar Compounds

| Name                        | 148                                                                                 | p-Nitrosodiphenylamine                                                              | 2,3,7,8-Tetrachlorodibenzo-p-dioxin                                                 |
|-----------------------------|-------------------------------------------------------------------------------------|-------------------------------------------------------------------------------------|-------------------------------------------------------------------------------------|
| Structure                   | 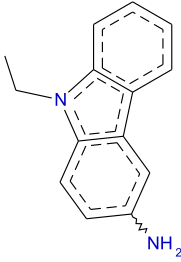 |  |  |
| Actual Endpoint (-log C)    | 3.7362                                                                              | 2.76567                                                                             | 9.31469                                                                             |
| Predicted Endpoint (-log C) | 3.75282                                                                             | 3.37945                                                                             | 4.75869                                                                             |
| Distance                    | 0.685                                                                               | 0.701                                                                               | 0.704                                                                               |
| Reference                   | CPDB                                                                                | CPDB                                                                                | CPDB                                                                                |

### Model Applicability

Unknown features are fingerprint features in the query molecule, but not found or appearing too infrequently in the training set.

1. All properties and OPS components are within expected ranges.
2. Unknown ECFP\_2 feature: 1126732433: [\*]:n:[c](Cl):n:[\*]
3. Unknown ECFP\_2 feature: -1311285389: [\*][c](:[\*]):[c](F):[cH]:[\*]

### Feature Contribution

| Top features for positive contribution |            |                                                                                                    |       |
|----------------------------------------|------------|----------------------------------------------------------------------------------------------------|-------|
| Fingerprint                            | Bit/Smiles | Feature Structure                                                                                  | Score |
| ECFP_6                                 | 655739385  | 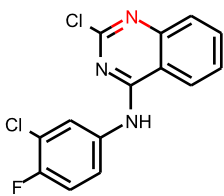<br>[*]:n:[*] | 0.229 |

| ECFP_6                                 | 834876373  | 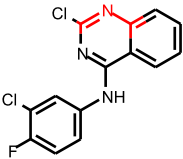<br><chem>[*][c](:[*]):n:[c](:[*]):[*]</chem> | 0.163  |
|----------------------------------------|------------|----------------------------------------------------------------------------------------------------------------------------------|--------|
| ECFP_6                                 | -817402818 | <br><chem>[*]Cl</chem>                        | 0.129  |
| Top Features for negative contribution |            |                                                                                                                                  |        |
| Fingerprint                            | Bit/Smiles | Feature Structure                                                                                                                | Score  |
| ECFP_6                                 | 1996767644 | <br><chem>[*]:[cH]:[cH]:[c](:[*]):[*]</chem>  | -0.251 |
| ECFP_6                                 | 642810091  | <br><chem>[*]:[c](:[*]):[*]</chem>          | -0.247 |
| ECFP_6                                 | -182236392 | <br><chem>[*]:[cH]:[*]</chem>               | -0.232 |

7a

## TOPKAT\_Carcinogenic\_Potency\_TD50\_Mouse

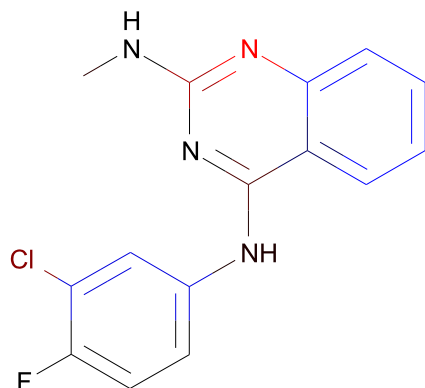C<sub>15</sub>H<sub>12</sub>ClFN<sub>4</sub>

Molecular Weight: 302.73398

ALogP: 4.677

Rotatable Bonds: 3

Acceptors: 4

Donors: 2

**Model Prediction**

Prediction: 8.65

Unit: mg/kg\_body\_weight/day

Mahalanobis Distance: 10.9

Mahalanobis Distance p-value: 0.00191

Mahalanobis Distance: The Mahalanobis distance (MD) is a generalization of the Euclidean distance that accounts for correlations among the X properties. It is calculated as the distance to the center of the training data. The larger the MD, the less trustworthy the prediction.

Mahalanobis Distance p-value: The p-value gives the fraction of training data with an MD greater than or equal to the one for the given sample, assuming normally distributed data. The smaller the p-value, the less trustworthy the prediction. For highly non-normal X properties (e.g., fingerprints), the MD p-value is wildly inaccurate.

**Structural Similar Compounds**

| Name                        | Phenolphthalein | 646      | 44      |
|-----------------------------|-----------------|----------|---------|
| Structure                   |                 |          |         |
| Actual Endpoint (-log C)    | 2.43468         | 0.937339 | 2.42163 |
| Predicted Endpoint (-log C) | 3.66084         | 3.26294  | 2.85113 |
| Distance                    | 0.646           | 0.696    | 0.698   |
| Reference                   | CPDB            | CPDB     | CPDB    |

**Model Applicability**

Unknown features are fingerprint features in the query molecule, but not found or appearing too infrequently in the training set.

1. All properties and OPS components are within expected ranges.
2. Unknown ECFP\_2 feature: -1311285389: [\*][c](:[\*]):[c](F):[cH]:[\*]

**Feature Contribution****Top features for positive contribution**

| Fingerprint | Bit/Smiles | Feature Structure | Score |
|-------------|------------|-------------------|-------|
| ECFP_6      | 655739385  | <br>[*]:n:[*]     | 0.229 |

| ECFP_6                                 | 834876373  | 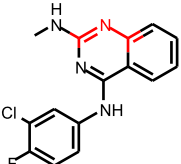<br><chem>[*][c](:[*]):n:[c](:[*])</chem> | 0.163  |
|----------------------------------------|------------|------------------------------------------------------------------------------------------------------------------------------|--------|
| ECFP_6                                 | -817402818 | <br><chem>[*]Cl</chem>                    | 0.129  |
| Top Features for negative contribution |            |                                                                                                                              |        |
| Fingerprint                            | Bit/Smiles | Feature Structure                                                                                                            | Score  |
| ECFP_6                                 | 1996767644 | <br><chem>[*]:[cH]:[cH]:[c](:[*])</chem>  | -0.251 |
| ECFP_6                                 | 642810091  | <br><chem>[*]:[c](:[*]):[*]</chem>      | -0.247 |
| ECFP_6                                 | -182236392 | <br><chem>[*]:[cH]:[*]</chem>           | -0.232 |

7b

## TOPKAT\_Carcinogenic\_Potency\_TD50\_Mouse

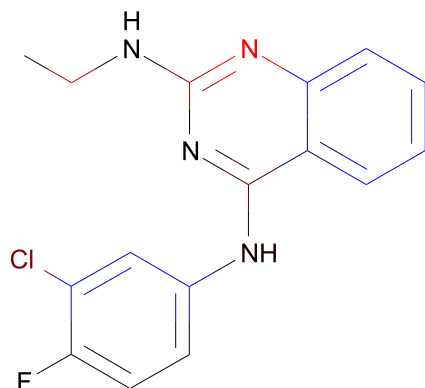C<sub>16</sub>H<sub>14</sub>ClFN<sub>4</sub>

Molecular Weight: 316.76056

ALogP: 5.025

Rotatable Bonds: 4

Acceptors: 4

Donors: 2

**Model Prediction**

Prediction: 5.92

Unit: mg/kg\_body\_weight/day

Mahalanobis Distance: 11

Mahalanobis Distance p-value: 0.00123

Mahalanobis Distance: The Mahalanobis distance (MD) is a generalization of the Euclidean distance that accounts for correlations among the X properties. It is calculated as the distance to the center of the training data. The larger the MD, the less trustworthy the prediction.

Mahalanobis Distance p-value: The p-value gives the fraction of training data with an MD greater than or equal to the one for the given sample, assuming normally distributed data. The smaller the p-value, the less trustworthy the prediction. For highly non-normal X properties (e.g., fingerprints), the MD p-value is wildly inaccurate.

**Structural Similar Compounds**

| Name                        | Phenolphthalein | 646      | Chlorobenzilate |
|-----------------------------|-----------------|----------|-----------------|
| Structure                   |                 |          |                 |
| Actual Endpoint (-log C)    | 2.43468         | 0.937339 | 3.53947         |
| Predicted Endpoint (-log C) | 3.66084         | 3.26294  | 3.34564         |
| Distance                    | 0.672           | 0.700    | 0.704           |
| Reference                   | CPDB            | CPDB     | CPDB            |

**Model Applicability**

Unknown features are fingerprint features in the query molecule, but not found or appearing too infrequently in the training set.

1. All properties and OPS components are within expected ranges.
2. Unknown ECFP\_2 feature: -1311285389: [\*][c](:[\*]):[c](F):[cH]:[\*]

**Feature Contribution****Top features for positive contribution**

| Fingerprint | Bit/Smiles | Feature Structure | Score |
|-------------|------------|-------------------|-------|
| ECFP_6      | 655739385  | <br>[*]:n:[*]     | 0.229 |

|                                        |            |                                                                                                                     |        |
|----------------------------------------|------------|---------------------------------------------------------------------------------------------------------------------|--------|
| ECFP_6                                 | 1559650422 | 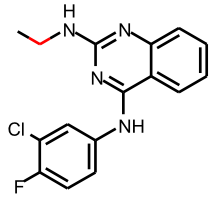<br>[*]C[*]                      | 0.203  |
| ECFP_6                                 | 834876373  | <br>[*][c](:[*]):n:[c](:[*]):[*] | 0.163  |
| Top Features for negative contribution |            |                                                                                                                     |        |
| Fingerprint                            | Bit/Smiles | Feature Structure                                                                                                   | Score  |
| ECFP_6                                 | 1996767644 | <br>[*]:[cH]:[cH]:[c](:[*]):[*]  | -0.251 |
| ECFP_6                                 | 642810091  | <br>[*]:[c](:[*]):[*]          | -0.247 |
| ECFP_6                                 | -182236392 | <br>[*]:[cH]:[*]               | -0.232 |

11a

TOPKAT\_Carcinogenic\_Potency\_TD50\_Mouse

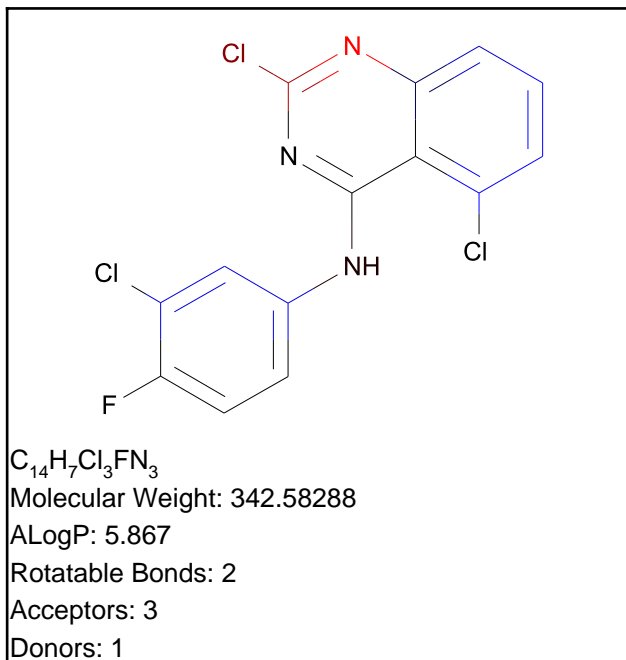

### Model Prediction

Prediction: 7.12

Unit: mg/kg\_body\_weight/day

Mahalanobis Distance: 9.93

Mahalanobis Distance p-value: 0.0434

Mahalanobis Distance: The Mahalanobis distance (MD) is a generalization of the Euclidean distance that accounts for correlations among the X properties. It is calculated as the distance to the center of the training data. The larger the MD, the less trustworthy the prediction.

Mahalanobis Distance p-value: The p-value gives the fraction of training data with an MD greater than or equal to the one for the given sample, assuming normally distributed data. The smaller the p-value, the less trustworthy the prediction. For highly non-normal X properties (e.g., fingerprints), the MD p-value is wildly inaccurate.

### Structural Similar Compounds

| Name                        | 2,3,7,8-Tetrachlorodibenzo-p-dioxin                                                 | Dicofol                                                                             | Nitrofen                                                                            |
|-----------------------------|-------------------------------------------------------------------------------------|-------------------------------------------------------------------------------------|-------------------------------------------------------------------------------------|
| Structure                   | 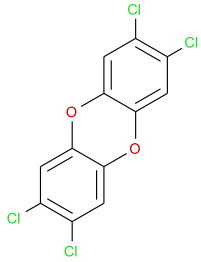 |  |  |
| Actual Endpoint (-log C)    | 9.31469                                                                             | 4.05158                                                                             | 3.39277                                                                             |
| Predicted Endpoint (-log C) | 4.75869                                                                             | 3.80707                                                                             | 3.41579                                                                             |
| Distance                    | 0.702                                                                               | 0.715                                                                               | 0.735                                                                               |
| Reference                   | CPDB                                                                                | CPDB                                                                                | CPDB                                                                                |

### Model Applicability

Unknown features are fingerprint features in the query molecule, but not found or appearing too infrequently in the training set.

1. All properties and OPS components are within expected ranges.
2. Unknown ECFP\_2 feature: 1126732433: [\*]:n:[c](Cl):n:[\*]
3. Unknown ECFP\_2 feature: -1311285389: [\*][c](:[\*]):[c](F):[cH]:[\*]

### Feature Contribution

| Top features for positive contribution |            |                                                                                                    |       |
|----------------------------------------|------------|----------------------------------------------------------------------------------------------------|-------|
| Fingerprint                            | Bit/Smiles | Feature Structure                                                                                  | Score |
| ECFP_6                                 | 655739385  | 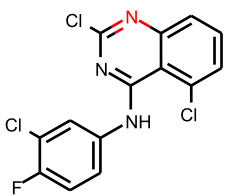<br>[*]:n:[*] | 0.229 |

| ECFP_6                                 | 834876373  | 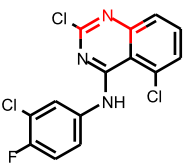<br><chem>[*][c](:[*]):n:[c](:[*]):[*]</chem> | 0.163  |
|----------------------------------------|------------|----------------------------------------------------------------------------------------------------------------------------------|--------|
| ECFP_6                                 | -817402818 | <br><chem>[*]Cl</chem>                        | 0.129  |
| Top Features for negative contribution |            |                                                                                                                                  |        |
| Fingerprint                            | Bit/Smiles | Feature Structure                                                                                                                | Score  |
| ECFP_6                                 | 1996767644 | <br><chem>[*]:[cH]:[cH]:[c](:[*]):[*]</chem>  | -0.251 |
| ECFP_6                                 | 642810091  | <br><chem>[*]:[c](:[*]):[*]</chem>          | -0.247 |
| ECFP_6                                 | -182236392 | <br><chem>[*]:[cH]:[*]</chem>               | -0.232 |

11b

## TOPKAT\_Carcinogenic\_Potency\_TD50\_Mouse

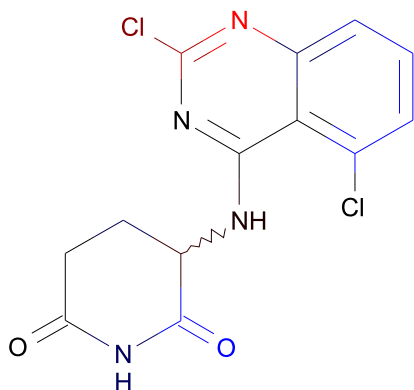C<sub>13</sub>H<sub>10</sub>Cl<sub>2</sub>N<sub>4</sub>O<sub>2</sub>

Molecular Weight: 325.15009

ALogP: 2.49

Rotatable Bonds: 2

Acceptors: 5

Donors: 2

**Model Prediction**

Prediction: 20.5

Unit: mg/kg\_body\_weight/day

Mahalanobis Distance: 12.7

Mahalanobis Distance p-value: 5.83e-007

Mahalanobis Distance: The Mahalanobis distance (MD) is a generalization of the Euclidean distance that accounts for correlations among the X properties. It is calculated as the distance to the center of the training data. The larger the MD, the less trustworthy the prediction.

Mahalanobis Distance p-value: The p-value gives the fraction of training data with an MD greater than or equal to the one for the given sample, assuming normally distributed data. The smaller the p-value, the less trustworthy the prediction. For highly non-normal X properties (e.g., fingerprints), the MD p-value is wildly inaccurate.

**Structural Similar Compounds**

| Name                        | 693     | Oxazepam | Chrysazin |
|-----------------------------|---------|----------|-----------|
| Structure                   |         |          |           |
| Actual Endpoint (-log C)    | 3.90356 | 3.90356  | 3.0774    |
| Predicted Endpoint (-log C) | 3.39677 | 3.39677  | 3.07832   |
| Distance                    | 0.610   | 0.610    | 0.615     |
| Reference                   | CPDB    | CPDB     | CPDB      |

**Model Applicability**

Unknown features are fingerprint features in the query molecule, but not found or appearing too infrequently in the training set.

1. All properties and OPS components are within expected ranges.
2. Unknown ECFP\_2 feature: 1126732433: [\*]:n:[c](Cl):n:[\*]
3. Unknown ECFP\_2 feature: -1237219435: [\*]C([\*])N[c]([\*]):[\*]
4. Unknown ECFP\_2 feature: -2097159651: [\*]CC(N[\*])C(=[\*])[\*]

**Feature Contribution**

| Top features for positive contribution |            |                   |       |
|----------------------------------------|------------|-------------------|-------|
| Fingerprint                            | Bit/Smiles | Feature Structure | Score |
| ECFP_6                                 | 655739385  |                   | 0.229 |

|                                        |            |                                                                                                                                   |        |
|----------------------------------------|------------|-----------------------------------------------------------------------------------------------------------------------------------|--------|
| ECFP_6                                 | 834876373  | 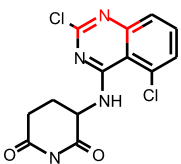<br><chem>[*][c](:[*]):n:[c](:[*]):[*]</chem>  | 0.163  |
| ECFP_6                                 | -817402818 | <br><chem>[*]Cl</chem>                         | 0.129  |
| Top Features for negative contribution |            |                                                                                                                                   |        |
| Fingerprint                            | Bit/Smiles | Feature Structure                                                                                                                 | Score  |
| ECFP_6                                 | 2106656448 | <br><chem>[*]C(=O)[*]</chem>                   | -0.275 |
| ECFP_6                                 | 1996767644 | <br><chem>[*]:[cH]:[cH]:[c](:[*]):[*]</chem> | -0.251 |
| ECFP_6                                 | 642810091  | <br><chem>[*]:[c](:[*]):[*]</chem>           | -0.247 |

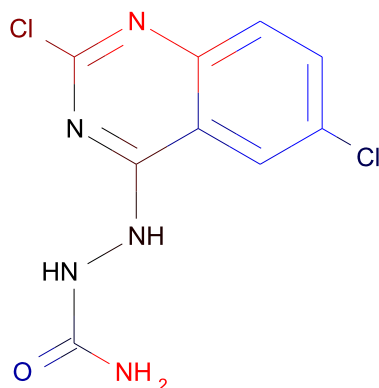

$C_9H_7Cl_2N_5O$

Molecular Weight: 272.09078

ALogP: 2.379

Rotatable Bonds: 2

Acceptors: 4

Donors: 3

## Model Prediction

Prediction: 10.1

Unit: mg/kg\_body\_weight/day

Mahalanobis Distance: 12.6

Mahalanobis Distance p-value: 1.32e-006

Mahalanobis Distance: The Mahalanobis distance (MD) is a generalization of the Euclidean distance that accounts for correlations among the X properties. It is calculated as the distance to the center of the training data. The larger the MD, the less trustworthy the prediction.

Mahalanobis Distance p-value: The p-value gives the fraction of training data with an MD greater than or equal to the one for the given sample, assuming normally distributed data. The smaller the p-value, the less trustworthy the prediction. For highly non-normal X properties (e.g., fingerprints), the MD p-value is wildly inaccurate.

## Structural Similar Compounds

| Name                        | 3,4,4'-Triaminodiphenyl ether | 2-Hydrazino-4-(p-aminophenyl) thi-azole | 215     |
|-----------------------------|-------------------------------|-----------------------------------------|---------|
| Structure                   |                               |                                         |         |
| Actual Endpoint (-log C)    | 4.20909                       | 4.26135                                 | 3.477   |
| Predicted Endpoint (-log C) | 3.19224                       | 4.32504                                 | 3.97642 |
| Distance                    | 0.589                         | 0.596                                   | 0.618   |
| Reference                   | CPDB                          | CPDB                                    | CPDB    |

## Model Applicability

Unknown features are fingerprint features in the query molecule, but not found or appearing too infrequently in the training set.

- OPS PC18 out of range. Value: -3.6042. Training min, max, SD, explained variance: -3.5308, 6.5936, 1.215, 0.0184.
- Unknown ECFP\_2 feature: 1126732433: [\*]:n:[c](Cl):n:[\*]

## Feature Contribution

### Top features for positive contribution

| Fingerprint | Bit/Smiles | Feature Structure | Score |
|-------------|------------|-------------------|-------|
| ECFP_6      | 655739385  | <br>[*]:n:[*]     | 0.229 |

|                                        |            |                                                                                                                              |        |
|----------------------------------------|------------|------------------------------------------------------------------------------------------------------------------------------|--------|
| ECFP_6                                 | 1572579716 | 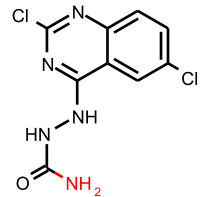<br><chem>[*]N</chem>                     | 0.225  |
| ECFP_6                                 | 834876373  | <br><chem>[*][c](:[*]):n:[c](:[*])</chem> | 0.163  |
| Top Features for negative contribution |            |                                                                                                                              |        |
| Fingerprint                            | Bit/Smiles | Feature Structure                                                                                                            | Score  |
| ECFP_6                                 | 1996767644 | <br><chem>[*]:[cH]:[cH]:[c](:[*])</chem>  | -0.251 |
| ECFP_6                                 | 642810091  | <br><chem>[*]:[c](:[*]):[*]</chem>       | -0.247 |
| ECFP_6                                 | 182236392  | <br><chem>[*]:[cH]:[*]</chem>           | -0.232 |

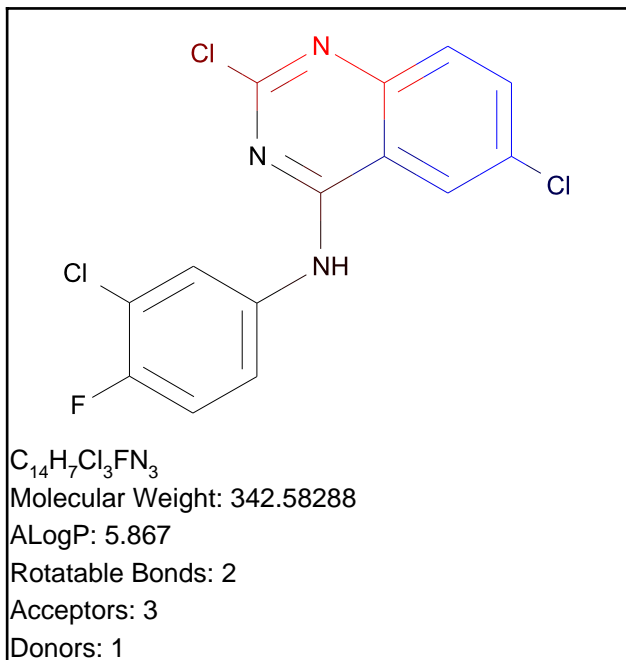

### Model Prediction

Prediction: 4.57

Unit: mg/kg\_body\_weight/day

Mahalanobis Distance: 11.3

Mahalanobis Distance p-value: 0.00044

Mahalanobis Distance: The Mahalanobis distance (MD) is a generalization of the Euclidean distance that accounts for correlations among the X properties. It is calculated as the distance to the center of the training data. The larger the MD, the less trustworthy the prediction.

Mahalanobis Distance p-value: The p-value gives the fraction of training data with an MD greater than or equal to the one for the given sample, assuming normally distributed data. The smaller the p-value, the less trustworthy the prediction. For highly non-normal X properties (e.g., fingerprints), the MD p-value is wildly inaccurate.

### Structural Similar Compounds

| Name                        | Dicofol                                                                             | 2,3,7,8-Tetrachlorodibenzo-p-dioxin                                                 | Nitrofen                                                                            |
|-----------------------------|-------------------------------------------------------------------------------------|-------------------------------------------------------------------------------------|-------------------------------------------------------------------------------------|
| Structure                   | 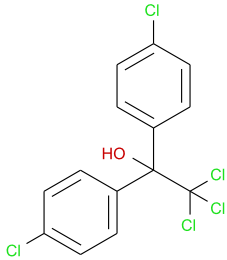 |  |  |
| Actual Endpoint (-log C)    | 4.05158                                                                             | 9.31469                                                                             | 3.39277                                                                             |
| Predicted Endpoint (-log C) | 3.80707                                                                             | 4.75869                                                                             | 3.41579                                                                             |
| Distance                    | 0.700                                                                               | 0.702                                                                               | 0.716                                                                               |
| Reference                   | CPDB                                                                                | CPDB                                                                                | CPDB                                                                                |

### Model Applicability

Unknown features are fingerprint features in the query molecule, but not found or appearing too infrequently in the training set.

1. OPS PC16 out of range. Value: 4.2781. Training min, max, SD, explained variance: -3.1026, 4.016, 1.245, 0.0193.
2. Unknown ECFP\_2 feature: 1126732433: [\*]:n:[c](Cl):n:[\*]
3. Unknown ECFP\_2 feature: -1311285389: [\*][c](:[\*]):[c](F):[cH]:[\*]

### Feature Contribution

#### Top features for positive contribution

| Fingerprint | Bit/Smiles | Feature Structure                                                                                  | Score |
|-------------|------------|----------------------------------------------------------------------------------------------------|-------|
| ECFP_6      | 655739385  | 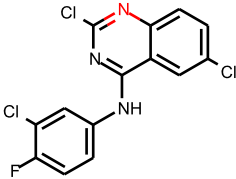<br>[*]:n:[*] | 0.229 |

|                                        |            |                                                                                                                                  |        |
|----------------------------------------|------------|----------------------------------------------------------------------------------------------------------------------------------|--------|
| ECFP_6                                 | 834876373  | 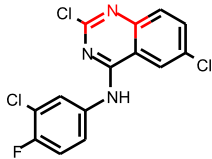<br><chem>[*][c](:[*]):n:[c](:[*]):[*]</chem> | 0.163  |
| ECFP_6                                 | -817402818 | <br><chem>[*]Cl</chem>                        | 0.129  |
| Top Features for negative contribution |            |                                                                                                                                  |        |
| Fingerprint                            | Bit/Smiles | Feature Structure                                                                                                                | Score  |
| ECFP_6                                 | 1996767644 | <br><chem>[*]:[cH]:[cH]:[c](:[*]):[*]</chem>  | -0.251 |
| ECFP_6                                 | 642810091  | <br><chem>[*]:[c](:[*]):[*]</chem>          | -0.247 |
| ECFP_6                                 | -182236392 | <br><chem>[*]:[cH]:[*]</chem>               | -0.232 |

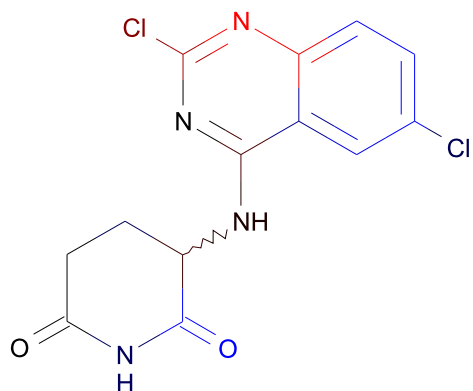
 $C_{13}H_{10}Cl_2N_4O_2$ 

Molecular Weight: 325.15009

ALogP: 2.49

Rotatable Bonds: 2

Acceptors: 5

Donors: 2

## Model Prediction

Prediction: 21.6

Unit: mg/kg\_body\_weight/day

Mahalanobis Distance: 13.6

Mahalanobis Distance p-value: 3.06e-009

Mahalanobis Distance: The Mahalanobis distance (MD) is a generalization of the Euclidean distance that accounts for correlations among the X properties. It is calculated as the distance to the center of the training data. The larger the MD, the less trustworthy the prediction.

Mahalanobis Distance p-value: The p-value gives the fraction of training data with an MD greater than or equal to the one for the given sample, assuming normally distributed data. The smaller the p-value, the less trustworthy the prediction. For highly non-normal X properties (e.g., fingerprints), the MD p-value is wildly inaccurate.

## Structural Similar Compounds

| Name                        | 693     | Oxazepam | Chrysazin |
|-----------------------------|---------|----------|-----------|
| Structure                   |         |          |           |
| Actual Endpoint (-log C)    | 3.90356 | 3.90356  | 3.0774    |
| Predicted Endpoint (-log C) | 3.39677 | 3.39677  | 3.07832   |
| Distance                    | 0.592   | 0.592    | 0.628     |
| Reference                   | CPDB    | CPDB     | CPDB      |

## Model Applicability

Unknown features are fingerprint features in the query molecule, but not found or appearing too infrequently in the training set.

1. OPS PC18 out of range. Value: -3.6033. Training min, max, SD, explained variance: -3.5308, 6.5936, 1.215, 0.0184.
2. Unknown ECFP\_2 feature: 1126732433: [\*]:n:[c](Cl):n:[\*]
3. Unknown ECFP\_2 feature: -1237219435: [\*]C([\*])N[c]([\*]):[\*]
4. Unknown ECFP\_2 feature: -2097159651: [\*]CC(N[\*])C(=[\*])[\*]

## Feature Contribution

### Top features for positive contribution

| Fingerprint | Bit/Smiles | Feature Structure | Score |
|-------------|------------|-------------------|-------|
| ECFP_6      | 655739385  | <br>[*]:n:[*]     | 0.229 |

|                                        |            |                                                                                                                      |        |
|----------------------------------------|------------|----------------------------------------------------------------------------------------------------------------------|--------|
| ECFP_6                                 | 834876373  | 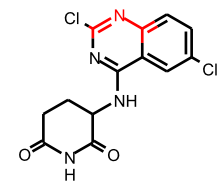<br>[*][c](:[*]):n:[c](:[*]):[*]  | 0.163  |
| ECFP_6                                 | -817402818 | <br>[*]Cl                         | 0.129  |
| Top Features for negative contribution |            |                                                                                                                      |        |
| Fingerprint                            | Bit/Smiles | Feature Structure                                                                                                    | Score  |
| ECFP_6                                 | 2106656448 | <br>[*]C(=O)[*]                   | -0.275 |
| ECFP_6                                 | 1996767644 | <br>[*]:[cH]:[cH]:[c](:[*]):[*] | -0.251 |
| ECFP_6                                 | 642810091  | <br>[*]:[c](:[*]):[*]           | -0.247 |

15b

## TOPKAT\_Carcinogenic\_Potency\_TD50\_Mouse

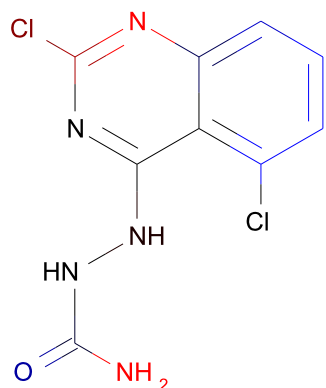C<sub>9</sub>H<sub>7</sub>Cl<sub>2</sub>N<sub>5</sub>O

Molecular Weight: 272.09077

ALogP: 2.379

Rotatable Bonds: 2

Acceptors: 4

Donors: 3

**Model Prediction**

Prediction: 9.53

Unit: mg/kg\_body\_weight/day

Mahalanobis Distance: 10.8

Mahalanobis Distance p-value: 0.00281

Mahalanobis Distance: The Mahalanobis distance (MD) is a generalization of the Euclidean distance that accounts for correlations among the X properties. It is calculated as the distance to the center of the training data. The larger the MD, the less trustworthy the prediction.

Mahalanobis Distance p-value: The p-value gives the fraction of training data with an MD greater than or equal to the one for the given sample, assuming normally distributed data. The smaller the p-value, the less trustworthy the prediction. For highly non-normal X properties (e.g., fingerprints), the MD p-value is wildly inaccurate.

**Structural Similar Compounds**

| Name                        | 2-Hydrazino-4-(p-aminophenyl) thi-azole | 3,4,4'-Triaminodiphenyl ether | 215     |
|-----------------------------|-----------------------------------------|-------------------------------|---------|
| Structure                   |                                         |                               |         |
| Actual Endpoint (-log C)    | 4.26135                                 | 4.20909                       | 3.477   |
| Predicted Endpoint (-log C) | 4.32504                                 | 3.19224                       | 3.97642 |
| Distance                    | 0.596                                   | 0.596                         | 0.611   |
| Reference                   | CPDB                                    | CPDB                          | CPDB    |

**Model Applicability**

Unknown features are fingerprint features in the query molecule, but not found or appearing too infrequently in the training set.

1. All properties and OPS components are within expected ranges.
2. Unknown ECFP\_2 feature: 1126732433: [\*]:n:[c](Cl):n:[\*]

**Feature Contribution**

| Top features for positive contribution |            |                   |       |
|----------------------------------------|------------|-------------------|-------|
| Fingerprint                            | Bit/Smiles | Feature Structure | Score |
| ECFP_6                                 | 655739385  | <br>[*]:n:[*]     | 0.229 |

|                                        |            |                                                                                                                              |        |
|----------------------------------------|------------|------------------------------------------------------------------------------------------------------------------------------|--------|
| ECFP_6                                 | 1572579716 | 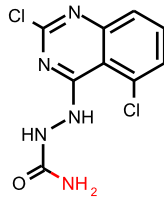<br><chem>[*]N</chem>                     | 0.225  |
| ECFP_6                                 | 834876373  | <br><chem>[*][c](:[*]):n:[c](:[*])</chem> | 0.163  |
| Top Features for negative contribution |            |                                                                                                                              |        |
| Fingerprint                            | Bit/Smiles | Feature Structure                                                                                                            | Score  |
| ECFP_6                                 | 1996767644 | <br><chem>[*]:[cH]:[cH]:[c](:[*])</chem>  | -0.251 |
| ECFP_6                                 | 642810091  | <br><chem>[*]:[c](:[*]):[*]</chem>      | -0.247 |
| ECFP_6                                 | 182236392  | <br><chem>[*]:[cH]:[*]</chem>           | -0.232 |

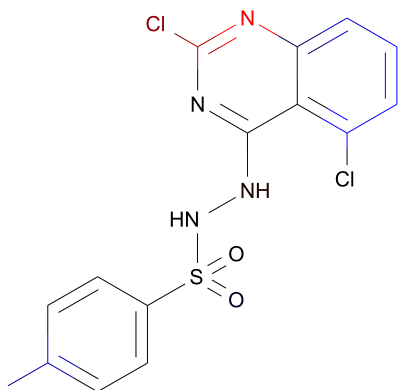

$C_{15}H_{12}Cl_2N_4O_2S$

Molecular Weight: 383.25237

ALogP: 4.443

Rotatable Bonds: 4

Acceptors: 5

Donors: 2

## Model Prediction

Prediction: 8.91

Unit: mg/kg\_body\_weight/day

Mahalanobis Distance: 11.3

Mahalanobis Distance p-value: 0.000538

Mahalanobis Distance: The Mahalanobis distance (MD) is a generalization of the Euclidean distance that accounts for correlations among the X properties. It is calculated as the distance to the center of the training data. The larger the MD, the less trustworthy the prediction.

Mahalanobis Distance p-value: The p-value gives the fraction of training data with an MD greater than or equal to the one for the given sample, assuming normally distributed data. The smaller the p-value, the less trustworthy the prediction. For highly non-normal X properties (e.g., fingerprints), the MD p-value is wildly inaccurate.

## Structural Similar Compounds

| Name                        | 646      | [4-Chloro-6-(2,3-xylidino)-2-pyrimidinylthio]acetic acid s | Phenolphthalein |
|-----------------------------|----------|------------------------------------------------------------|-----------------|
| Structure                   |          |                                                            |                 |
| Actual Endpoint (-log C)    | 0.937339 | 4.47685                                                    | 2.43468         |
| Predicted Endpoint (-log C) | 3.26294  | 3.8529                                                     | 3.66084         |
| Distance                    | 0.627    | 0.662                                                      | 0.678           |
| Reference                   | CPDB     | CPDB                                                       | CPDB            |

## Model Applicability

Unknown features are fingerprint features in the query molecule, but not found or appearing too infrequently in the training set.

1. All properties and OPS components are within expected ranges.
2. Unknown ECFP\_2 feature: 1126732433: [\*]:n:[c](Cl):n:[\*]
3. Unknown ECFP\_2 feature: 944235823: [\*]NNS(=[\*])(=[\*])[\*]

## Feature Contribution

| Top features for positive contribution |            |                   |       |
|----------------------------------------|------------|-------------------|-------|
| Fingerprint                            | Bit/Smiles | Feature Structure | Score |
| ECFP_6                                 | 655739385  | <p>[*]:n:[*]</p>  | 0.229 |

|                                        |            |                                                                                                                              |        |
|----------------------------------------|------------|------------------------------------------------------------------------------------------------------------------------------|--------|
| ECFP_6                                 | 834876373  | 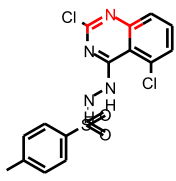<br><chem>[*][c](:[*]):n:[c](:[*])</chem> | 0.163  |
| ECFP_6                                 | -817402818 | <br><chem>[*]Cl</chem>                    | 0.129  |
| Top Features for negative contribution |            |                                                                                                                              |        |
| Fingerprint                            | Bit/Smiles | Feature Structure                                                                                                            | Score  |
| ECFP_6                                 | 1996767644 | <br><chem>[*]:[cH]:[cH]:[c](:[*])</chem>  | -0.251 |
| ECFP_6                                 | 642810091  | <br><chem>[*]:[c](:[*]):[*]</chem>       | -0.247 |
| ECFP_6                                 | -182236392 | <br><chem>[*]:[cH]:[*]</chem>           | -0.232 |

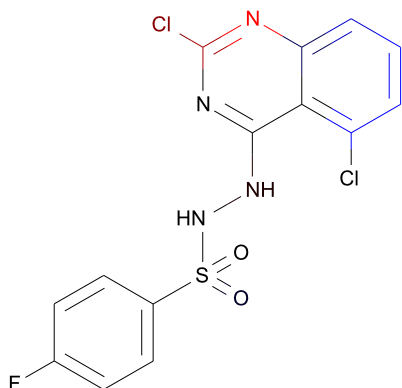

$C_{14}H_9Cl_2FN_4O_2S$

Molecular Weight: 387.21626

ALogP: 4.162

Rotatable Bonds: 4

Acceptors: 5

Donors: 2

## Model Prediction

Prediction: 6.89

Unit: mg/kg\_body\_weight/day

Mahalanobis Distance: 10.2

Mahalanobis Distance p-value: 0.0208

Mahalanobis Distance: The Mahalanobis distance (MD) is a generalization of the Euclidean distance that accounts for correlations among the X properties. It is calculated as the distance to the center of the training data. The larger the MD, the less trustworthy the prediction.

Mahalanobis Distance p-value: The p-value gives the fraction of training data with an MD greater than or equal to the one for the given sample, assuming normally distributed data. The smaller the p-value, the less trustworthy the prediction. For highly non-normal X properties (e.g., fingerprints), the MD p-value is wildly inaccurate.

## Structural Similar Compounds

| Name                        | 646      | [4-Chloro-6-(2,3-xylidino)-2-pyrimidinylthio]acetic acid s | Phenolphthalein |
|-----------------------------|----------|------------------------------------------------------------|-----------------|
| Structure                   |          |                                                            |                 |
| Actual Endpoint (-log C)    | 0.937339 | 4.47685                                                    | 2.43468         |
| Predicted Endpoint (-log C) | 3.26294  | 3.8529                                                     | 3.66084         |
| Distance                    | 0.656    | 0.676                                                      | 0.677           |
| Reference                   | CPDB     | CPDB                                                       | CPDB            |

## Model Applicability

Unknown features are fingerprint features in the query molecule, but not found or appearing too infrequently in the training set.

1. All properties and OPS components are within expected ranges.
2. Unknown ECFP\_2 feature: 1126732433: [\*]:n:[c](Cl):n:[\*]
3. Unknown ECFP\_2 feature: 944235823: [\*]NNS(=[\*])(=[\*])[\*]

## Feature Contribution

| Top features for positive contribution |            |                   |       |
|----------------------------------------|------------|-------------------|-------|
| Fingerprint                            | Bit/Smiles | Feature Structure | Score |
| ECFP_6                                 | 655739385  | <p>[*]:n:[*]</p>  | 0.229 |

|                                        |            |                                                                                                                              |        |
|----------------------------------------|------------|------------------------------------------------------------------------------------------------------------------------------|--------|
| ECFP_6                                 | 834876373  | 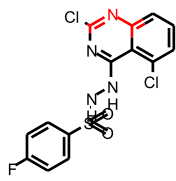<br><chem>[*][c](:[*]):n:[c](:[*])</chem> | 0.163  |
| ECFP_6                                 | -817402818 | <br><chem>[*]Cl</chem>                    | 0.129  |
| Top Features for negative contribution |            |                                                                                                                              |        |
| Fingerprint                            | Bit/Smiles | Feature Structure                                                                                                            | Score  |
| ECFP_6                                 | 1996767644 | <br><chem>[*]:[cH]:[cH]:[c](:[*])</chem>  | -0.251 |
| ECFP_6                                 | 642810091  | <br><chem>[*]:[c](:[*]):[*]</chem>       | -0.247 |
| ECFP_6                                 | -182236392 | <br><chem>[*]:[cH]:[*]</chem>           | -0.232 |

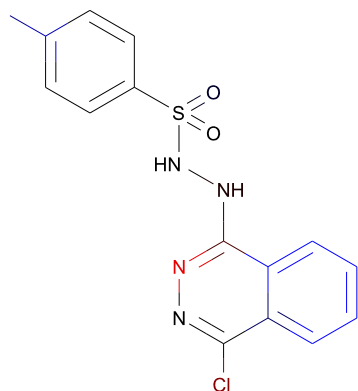

$C_{15}H_{13}ClN_4O_2S$

Molecular Weight: 348.80731

ALogP: 3.529

Rotatable Bonds: 4

Acceptors: 5

Donors: 2

## Model Prediction

Prediction: 21.2

Unit: mg/kg\_body\_weight/day

Mahalanobis Distance: 12.5

Mahalanobis Distance p-value: 2.15e-006

Mahalanobis Distance: The Mahalanobis distance (MD) is a generalization of the Euclidean distance that accounts for correlations among the X properties. It is calculated as the distance to the center of the training data. The larger the MD, the less trustworthy the prediction.

Mahalanobis Distance p-value: The p-value gives the fraction of training data with an MD greater than or equal to the one for the given sample, assuming normally distributed data. The smaller the p-value, the less trustworthy the prediction. For highly non-normal X properties (e.g., fingerprints), the MD p-value is wildly inaccurate.

## Structural Similar Compounds

| Name                        | 646      | Phenolphthalein | C.I. pigment red 3 |
|-----------------------------|----------|-----------------|--------------------|
| Structure                   |          |                 |                    |
| Actual Endpoint (-log C)    | 0.937339 | 2.43468         | 0.937339           |
| Predicted Endpoint (-log C) | 3.26294  | 3.66084         | 3.17837            |
| Distance                    | 0.618    | 0.659           | 0.660              |
| Reference                   | CPDB     | CPDB            | CPDB               |

## Model Applicability

Unknown features are fingerprint features in the query molecule, but not found or appearing too infrequently in the training set.

1. OPS PC26 out of range. Value: -3.4447. Training min, max, SD, explained variance: -2.9667, 3.5042, 1.009, 0.0127.
2. Unknown ECFP\_2 feature: 1050351974: [\*]:n:[c](Cl):[c](:[\*]):[\*]
3. Unknown ECFP\_2 feature: 944235823: [\*]NNS(=[\*])(=[\*])[\*]

## Feature Contribution

### Top features for positive contribution

| Fingerprint | Bit/Smiles | Feature Structure | Score |
|-------------|------------|-------------------|-------|
| ECFP_6      | 655739385  | <p>[*]:n:[*]</p>  | 0.229 |

|                                        |            |                                                                                                                                      |        |
|----------------------------------------|------------|--------------------------------------------------------------------------------------------------------------------------------------|--------|
| ECFP_6                                 | -817402818 | 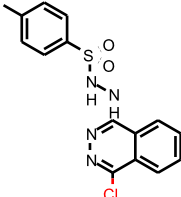<br>[*]Cl                                         | 0.129  |
| ECFP_6                                 | 1333660716 | <br>[*][c](:[*]):[c](:[cH<br>]:[*]):[c](:[*]):[*] | 0.0746 |
| Top Features for negative contribution |            |                                                                                                                                      |        |
| Fingerprint                            | Bit/Smiles | Feature Structure                                                                                                                    | Score  |
| ECFP_6                                 | 1996767644 | <br>[*]:[cH]:[cH]:[c](:[*<br>]):[*]               | -0.251 |
| ECFP_6                                 | 642810091  | <br>[*]:[c](:[*]):[*]                            | -0.247 |
| ECFP_6                                 | -182236392 | <br>[*]:[cH]:[*]                                | -0.232 |

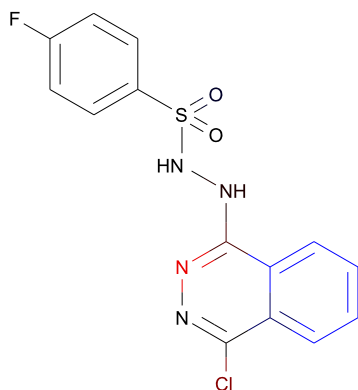

$C_{14}H_{10}ClFN_4O_2S$

Molecular Weight: 352.7712

ALogP: 3.248

Rotatable Bonds: 4

Acceptors: 5

Donors: 2

## Model Prediction

Prediction: 16.4

Unit: mg/kg\_body\_weight/day

Mahalanobis Distance: 11.3

Mahalanobis Distance p-value: 0.000448

Mahalanobis Distance: The Mahalanobis distance (MD) is a generalization of the Euclidean distance that accounts for correlations among the X properties. It is calculated as the distance to the center of the training data. The larger the MD, the less trustworthy the prediction.

Mahalanobis Distance p-value: The p-value gives the fraction of training data with an MD greater than or equal to the one for the given sample, assuming normally distributed data. The smaller the p-value, the less trustworthy the prediction. For highly non-normal X properties (e.g., fingerprints), the MD p-value is wildly inaccurate.

## Structural Similar Compounds

| Name                        | 646      | Phenolphthalein | C.I. pigment red 3 |
|-----------------------------|----------|-----------------|--------------------|
| Structure                   |          |                 |                    |
| Actual Endpoint (-log C)    | 0.937339 | 2.43468         | 0.937339           |
| Predicted Endpoint (-log C) | 3.26294  | 3.66084         | 3.17837            |
| Distance                    | 0.655    | 0.664           | 0.686              |
| Reference                   | CPDB     | CPDB            | CPDB               |

## Model Applicability

Unknown features are fingerprint features in the query molecule, but not found or appearing too infrequently in the training set.

1. OPS PC26 out of range. Value: -3.2042. Training min, max, SD, explained variance: -2.9667, 3.5042, 1.009, 0.0127.
2. Unknown ECFP\_2 feature: 1050351974: [\*]:n:[c](Cl):[c](:[\*]):[\*]
3. Unknown ECFP\_2 feature: 944235823: [\*]NNS(=[\*])(=[\*])[\*]

## Feature Contribution

### Top features for positive contribution

| Fingerprint | Bit/Smiles | Feature Structure | Score |
|-------------|------------|-------------------|-------|
| ECFP_6      | 655739385  | <br>[*]:n:[*]     | 0.229 |

|                                        |            |                                                                                                                                      |        |
|----------------------------------------|------------|--------------------------------------------------------------------------------------------------------------------------------------|--------|
| ECFP_6                                 | -817402818 | 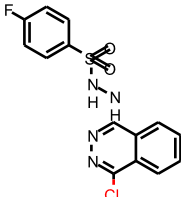<br>[*]Cl                                         | 0.129  |
| ECFP_6                                 | 1333660716 | <br>[*][c](:[*]):[c](:[cH<br>]:[*]):[c](:[*]):[*] | 0.0746 |
| Top Features for negative contribution |            |                                                                                                                                      |        |
| Fingerprint                            | Bit/Smiles | Feature Structure                                                                                                                    | Score  |
| ECFP_6                                 | 1996767644 | <br>[*]:[cH]:[cH]:[c](:[*<br>]):[*]               | -0.251 |
| ECFP_6                                 | 642810091  | <br>[*]:[c](:[*]):[*]                            | -0.247 |
| ECFP_6                                 | -182236392 | <br>[*]:[cH]:[*]                                | -0.232 |

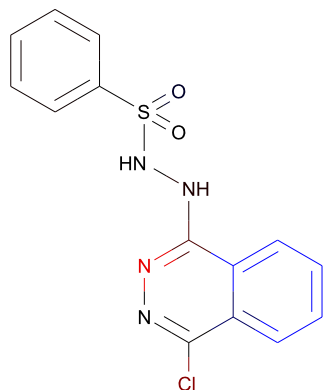

$C_{14}H_{11}ClN_4O_2S$

Molecular Weight: 334.78073

ALogP: 3.043

Rotatable Bonds: 4

Acceptors: 5

Donors: 2

## Model Prediction

Prediction: 17.2

Unit: mg/kg\_body\_weight/day

Mahalanobis Distance: 12.3

Mahalanobis Distance p-value: 6.1e-006

Mahalanobis Distance: The Mahalanobis distance (MD) is a generalization of the Euclidean distance that accounts for correlations among the X properties. It is calculated as the distance to the center of the training data. The larger the MD, the less trustworthy the prediction.

Mahalanobis Distance p-value: The p-value gives the fraction of training data with an MD greater than or equal to the one for the given sample, assuming normally distributed data. The smaller the p-value, the less trustworthy the prediction. For highly non-normal X properties (e.g., fingerprints), the MD p-value is wildly inaccurate.

## Structural Similar Compounds

| Name                        | 646      | Phenolphthalein | C.I. pigment red 3 |
|-----------------------------|----------|-----------------|--------------------|
| Structure                   |          |                 |                    |
| Actual Endpoint (-log C)    | 0.937339 | 2.43468         | 0.937339           |
| Predicted Endpoint (-log C) | 3.26294  | 3.66084         | 3.17837            |
| Distance                    | 0.659    | 0.664           | 0.684              |
| Reference                   | CPDB     | CPDB            | CPDB               |

## Model Applicability

Unknown features are fingerprint features in the query molecule, but not found or appearing too infrequently in the training set.

1. OPS PC26 out of range. Value: -2.9692. Training min, max, SD, explained variance: -2.9667, 3.5042, 1.009, 0.0127.
2. Unknown ECFP\_2 feature: 1050351974: [\*]:n:[c](Cl):[c]([\*]):[\*]
3. Unknown ECFP\_2 feature: 944235823: [\*]NNS(=[\*])(=[\*])[\*]

## Feature Contribution

### Top features for positive contribution

| Fingerprint | Bit/Smiles | Feature Structure | Score |
|-------------|------------|-------------------|-------|
| ECFP_6      | 655739385  | <br>[*]:n:[*]     | 0.229 |

|                                        |            |                                                                                                                                                    |        |
|----------------------------------------|------------|----------------------------------------------------------------------------------------------------------------------------------------------------|--------|
| ECFP_6                                 | -817402818 | 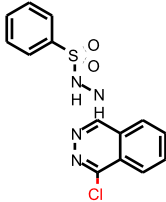<br><chem>[*]Cl</chem>                                          | 0.129  |
| ECFP_6                                 | 1333660716 | <br><chem>[*][c](:[*]):[c](:[cH<br/>]:[*]):[c](:[*]):[*]</chem> | 0.0746 |
| Top Features for negative contribution |            |                                                                                                                                                    |        |
| Fingerprint                            | Bit/Smiles | Feature Structure                                                                                                                                  | Score  |
| ECFP_6                                 | 1996767644 | <br><chem>[*]:[cH]:[cH]:[c](:[*<br/>]):[*]</chem>               | -0.251 |
| ECFP_6                                 | 642810091  | <br><chem>[*]:[c](:[*]):[*]</chem>                            | -0.247 |
| ECFP_6                                 | -182236392 | <br><chem>[*]:[cH]:[*]</chem>                                 | -0.232 |

# Thalidomide

# TOPKAT\_Carcinogenic\_Potency\_TD50\_Mouse

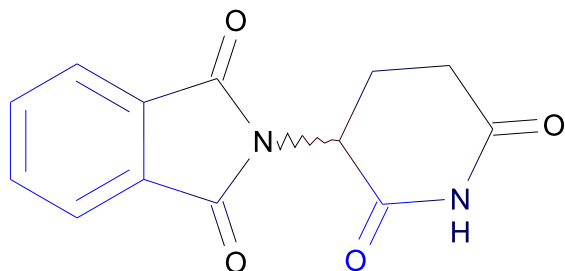

C<sub>13</sub>H<sub>10</sub>N<sub>2</sub>O<sub>4</sub>

Molecular Weight: 258.22949

ALogP: 9.7e-002

Rotatable Bonds: 1

Acceptors: 4

Donors: 1

## Model Prediction

Prediction: 367

Unit: mg/kg\_body\_weight/day

Mahalanobis Distance: 9.93

Mahalanobis Distance p-value: 0.043

Mahalanobis Distance: The Mahalanobis distance (MD) is a generalization of the Euclidean distance that accounts for correlations among the X properties. It is calculated as the distance to the center of the training data. The larger the MD, the less trustworthy the prediction.

Mahalanobis Distance p-value: The p-value gives the fraction of training data with an MD greater than or equal to the one for the given sample, assuming normally distributed data. The smaller the p-value, the less trustworthy the prediction. For highly non-normal X properties (e.g., fingerprints), the MD p-value is wildly inaccurate.

## Structural Similar Compounds

| Name                        | 581     | Phenobarbital s | 1-[(5-Nitrofurfuryli-dene)ami-no]hy-dantoin |
|-----------------------------|---------|-----------------|---------------------------------------------|
| Structure                   |         |                 |                                             |
| Actual Endpoint (-log C)    | 3.89128 | 4.49846         | 2.23074                                     |
| Predicted Endpoint (-log C) | 3.31105 | 3.14828         | 3.18468                                     |
| Distance                    | 0.590   | 0.638           | 0.660                                       |
| Reference                   | CPDB    | CPDB            | CPDB                                        |

## Model Applicability

Unknown features are fingerprint features in the query molecule, but not found or appearing too infrequently in the training set.

1. All properties and OPS components are within expected ranges.
2. Unknown ECFP\_2 feature: -957084426: [\*]C([\*])N1C(=[\*])[\*]:[\*]C1=[\*]

## Feature Contribution

| Top features for positive contribution |            |                   |        |
|----------------------------------------|------------|-------------------|--------|
| Fingerprint                            | Bit/Smiles | Feature Structure | Score  |
| ECFP_6                                 | -167460056 | <br>[*]C([*])[*]  | 0.0596 |

|                                        |            |                                                                                                                                 |         |
|----------------------------------------|------------|---------------------------------------------------------------------------------------------------------------------------------|---------|
| ECFP_6                                 | 670515721  | 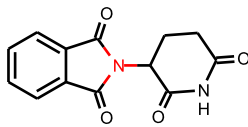<br><chem>[*]N([*])[*]</chem>                | 0.00735 |
| Top Features for negative contribution |            |                                                                                                                                 |         |
| Fingerprint                            | Bit/Smiles | Feature Structure                                                                                                               | Score   |
| ECFP_6                                 | 2106656448 | <br><chem>[*]C(=O)[*]</chem>                 | -0.275  |
| ECFP_6                                 | 1996767644 | <br><chem>[*]:[cH]:[cH]:[c](:[*]):[*]</chem> | -0.251  |
| ECFP_6                                 | 642810091  | <br><chem>[*]:[c](:[*]):[*]</chem>         | -0.247  |

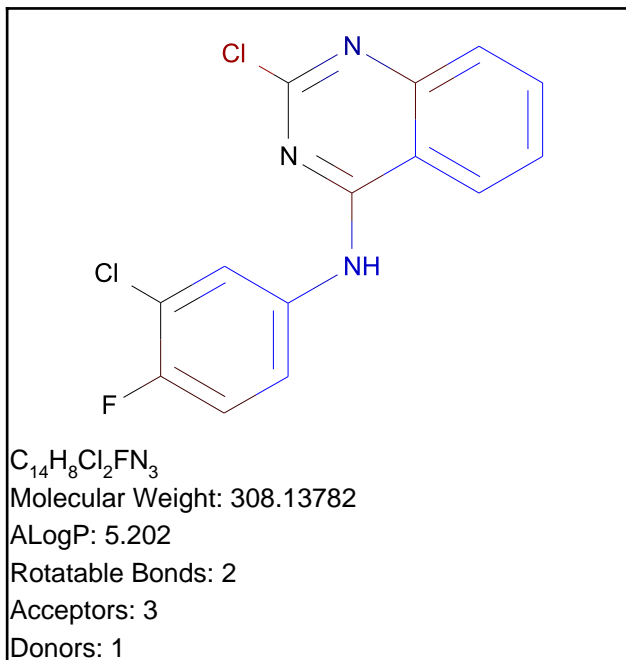

### Model Prediction

Prediction: 18.6

Unit: mg/kg\_body\_weight/day

Mahalanobis Distance: 11.7

Mahalanobis Distance p-value: 0.00147

Mahalanobis Distance: The Mahalanobis distance (MD) is a generalization of the Euclidean distance that accounts for correlations among the X properties. It is calculated as the distance to the center of the training data. The larger the MD, the less trustworthy the prediction.

Mahalanobis Distance p-value: The p-value gives the fraction of training data with an MD greater than or equal to the one for the given sample, assuming normally distributed data. The smaller the p-value, the less trustworthy the prediction. For highly non-normal X properties (e.g., fingerprints), the MD p-value is wildly inaccurate.

### Structural Similar Compounds

| Name                        | 45                                                                                  | 357                                                                                 | 4-(4-N-Methyl-N-nitrosamino-styryl)quinoline                                        |
|-----------------------------|-------------------------------------------------------------------------------------|-------------------------------------------------------------------------------------|-------------------------------------------------------------------------------------|
| Structure                   | 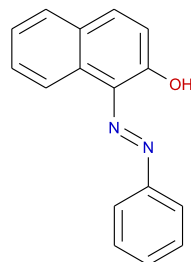 |  |  |
| Actual Endpoint (-log C)    | 3.92659                                                                             | 5.61692                                                                             | 5.61692                                                                             |
| Predicted Endpoint (-log C) | 3.28325                                                                             | 5.49128                                                                             | 5.49128                                                                             |
| Distance                    | 0.530                                                                               | 0.601                                                                               | 0.601                                                                               |
| Reference                   | CPDB                                                                                | CPDB                                                                                | CPDB                                                                                |

### Model Applicability

Unknown features are fingerprint features in the query molecule, but not found or appearing too infrequently in the training set.

1. All properties and OPS components are within expected ranges.

### Feature Contribution

| Top features for positive contribution |            |                                                                                                |       |
|----------------------------------------|------------|------------------------------------------------------------------------------------------------|-------|
| Fingerprint                            | Bit/Smiles | Feature Structure                                                                              | Score |
| FCFP_6                                 | 32         | 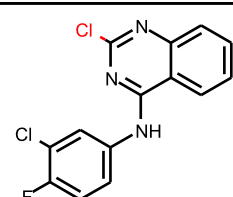<br>[*]Cl | 0.154 |

|                                        |            |                                                                                                                                                 |        |
|----------------------------------------|------------|-------------------------------------------------------------------------------------------------------------------------------------------------|--------|
| FCFP_6                                 | 307419094  | 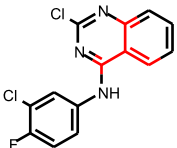<br><chem>[*][c](:[*]):[c](:[cH] ):[*]):[c](:[*]):[*]</chem> | 0.121  |
| FCFP_6                                 | 3          | <br><chem>[*]N[*]</chem>                                     | 0.064  |
| Top Features for negative contribution |            |                                                                                                                                                 |        |
| Fingerprint                            | Bit/Smiles | Feature Structure                                                                                                                               | Score  |
| FCFP_6                                 | 991735244  | <br><chem>[*]:[c]1:[*]:[cH]:[cH] ]:[cH]:[cH]:1</chem>        | -0.422 |
| FCFP_6                                 | 16         | <br><chem>[*]:[cH]:[*]</chem>                              | -0.354 |
| FCFP_6                                 | 590925877  | <br><chem>[*]N[c](:[cH]:[*]):[c H]:[*]</chem>              | -0.323 |

7a

TOPKAT\_Carcinogenic\_Potency\_TD50\_Rat

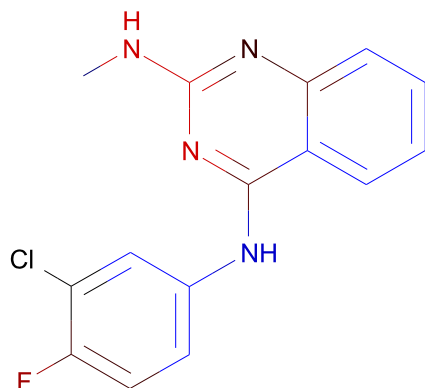C<sub>15</sub>H<sub>12</sub>ClFN<sub>4</sub>

Molecular Weight: 302.73398

ALogP: 4.677

Rotatable Bonds: 3

Acceptors: 4

Donors: 2

## Model Prediction

Prediction: 12

Unit: mg/kg\_body\_weight/day

Mahalanobis Distance: 13.9

Mahalanobis Distance p-value: 4.08e-008

Mahalanobis Distance: The Mahalanobis distance (MD) is a generalization of the Euclidean distance that accounts for correlations among the X properties. It is calculated as the distance to the center of the training data. The larger the MD, the less trustworthy the prediction.

Mahalanobis Distance p-value: The p-value gives the fraction of training data with an MD greater than or equal to the one for the given sample, assuming normally distributed data. The smaller the p-value, the less trustworthy the prediction. For highly non-normal X properties (e.g., fingerprints), the MD p-value is wildly inaccurate.

## Structural Similar Compounds

| Name                        | 45      | Indomethacin | Phenolphthalein |
|-----------------------------|---------|--------------|-----------------|
| Structure                   |         |              |                 |
| Actual Endpoint (-log C)    | 3.92659 | 5.49293      | 2.54766         |
| Predicted Endpoint (-log C) | 3.28325 | 4.9569       | 3.7508          |
| Distance                    | 0.618   | 0.629        | 0.630           |
| Reference                   | CPDB    | CPDB         | CPDB            |

## Model Applicability

Unknown features are fingerprint features in the query molecule, but not found or appearing too infrequently in the training set.

1. OPS PC18 out of range. Value: 4.9898. Training min, max, SD, explained variance: -4.1023, 4.8669, 1.305, 0.0164.

## Feature Contribution

### Top features for positive contribution

| Fingerprint | Bit/Smiles  | Feature Structure                      | Score |
|-------------|-------------|----------------------------------------|-------|
| FCFP_6      | -1151914249 | <br><chem>[*]N[c](:n:[*]):n:[*]</chem> | 0.204 |

|                                        |            |                                                                                                                                      |        |
|----------------------------------------|------------|--------------------------------------------------------------------------------------------------------------------------------------|--------|
| FCFP_6                                 | 32         | 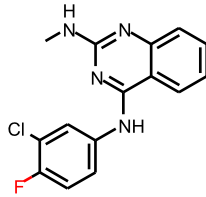<br>[*]Cl                                         | 0.154  |
| FCFP_6                                 | 307419094  | <br>[*][c](:[*]):[c](:[cH<br>]:[*]):[c](:[*]):[*] | 0.121  |
| Top Features for negative contribution |            |                                                                                                                                      |        |
| Fingerprint                            | Bit/Smiles | Feature Structure                                                                                                                    | Score  |
| FCFP_6                                 | 991735244  | <br>[*]:[c]1:[*]:[cH]:[cH<br>]:[cH]:[cH]:1        | -0.422 |
| FCFP_6                                 | 16         | <br>[*]:[cH]:[*]                                 | -0.354 |
| FCFP_6                                 | 590925877  | <br>[*]N[c](:[cH]:[*]):[c<br>H]:[*]             | -0.323 |

7b

TOPKAT\_Carcinogenic\_Potency\_TD50\_Rat

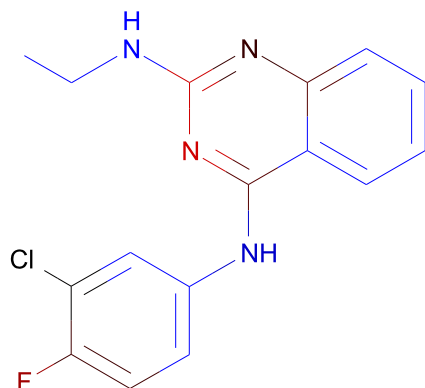C<sub>16</sub>H<sub>14</sub>ClFN<sub>4</sub>

Molecular Weight: 316.76056

ALogP: 5.025

Rotatable Bonds: 4

Acceptors: 4

Donors: 2

## Model Prediction

Prediction: 35.7

Unit: mg/kg\_body\_weight/day

Mahalanobis Distance: 14.1

Mahalanobis Distance p-value: 9.65e-009

Mahalanobis Distance: The Mahalanobis distance (MD) is a generalization of the Euclidean distance that accounts for correlations among the X properties. It is calculated as the distance to the center of the training data. The larger the MD, the less trustworthy the prediction.

Mahalanobis Distance p-value: The p-value gives the fraction of training data with an MD greater than or equal to the one for the given sample, assuming normally distributed data. The smaller the p-value, the less trustworthy the prediction. For highly non-normal X properties (e.g., fingerprints), the MD p-value is wildly inaccurate.

## Structural Similar Compounds

| Name                        | Indomethacin | 45      | Phenolphthalein |
|-----------------------------|--------------|---------|-----------------|
| Structure                   |              |         |                 |
| Actual Endpoint (-log C)    | 5.49293      | 3.92659 | 2.54766         |
| Predicted Endpoint (-log C) | 4.9569       | 3.28325 | 3.7508          |
| Distance                    | 0.623        | 0.644   | 0.650           |
| Reference                   | CPDB         | CPDB    | CPDB            |

## Model Applicability

Unknown features are fingerprint features in the query molecule, but not found or appearing too infrequently in the training set.

- OPS PC18 out of range. Value: 5.121. Training min, max, SD, explained variance: -4.1023, 4.8669, 1.305, 0.0164.

## Feature Contribution

### Top features for positive contribution

| Fingerprint | Bit/Smiles  | Feature Structure                      | Score |
|-------------|-------------|----------------------------------------|-------|
| FCFP_6      | -1151914249 | <br><chem>[*]N[c](:n:[*]):n:[*]</chem> | 0.204 |

|                                        |             |                                                                                                                                      |        |
|----------------------------------------|-------------|--------------------------------------------------------------------------------------------------------------------------------------|--------|
| FCFP_6                                 | 32          | 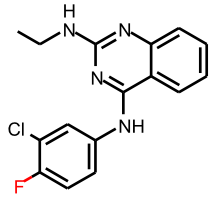<br>[*]Cl                                         | 0.154  |
| FCFP_6                                 | 307419094   | <br>[*][c](:[*]):[c](:[cH<br>]:[*]):[c](:[*]):[*] | 0.121  |
| Top Features for negative contribution |             |                                                                                                                                      |        |
| Fingerprint                            | Bit/Smiles  | Feature Structure                                                                                                                    | Score  |
| FCFP_6                                 | -1272709286 | <br>[*]NCC                                        | -0.526 |
| FCFP_6                                 | 991735244   | <br>[*]:[c]1:[*]:[cH]:[cH<br>]:[cH]:[cH]:1      | -0.422 |
| FCFP_6                                 | 16          | <br>[*]:[cH]:[*]                                | -0.354 |

11a

TOPKAT\_Carcinogenic\_Potency\_TD50\_Rat

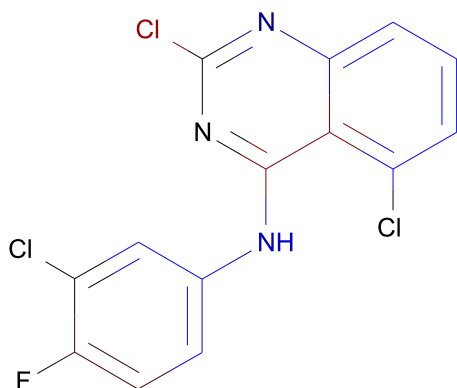C<sub>14</sub>H<sub>7</sub>Cl<sub>3</sub>FN<sub>3</sub>

Molecular Weight: 342.58288

ALogP: 5.867

Rotatable Bonds: 2

Acceptors: 3

Donors: 1

## Model Prediction

Prediction: 16

Unit: mg/kg\_body\_weight/day

Mahalanobis Distance: 14

Mahalanobis Distance p-value: 1.83e-008

Mahalanobis Distance: The Mahalanobis distance (MD) is a generalization of the Euclidean distance that accounts for correlations among the X properties. It is calculated as the distance to the center of the training data. The larger the MD, the less trustworthy the prediction.

Mahalanobis Distance p-value: The p-value gives the fraction of training data with an MD greater than or equal to the one for the given sample, assuming normally distributed data. The smaller the p-value, the less trustworthy the prediction. For highly non-normal X properties (e.g., fingerprints), the MD p-value is wildly inaccurate.

## Structural Similar Compounds

| Name                        | 45      | 4-(4-N-Methyl-N-nitrosamino-styryl)quinoline | 357     |
|-----------------------------|---------|----------------------------------------------|---------|
| Structure                   |         |                                              |         |
| Actual Endpoint (-log C)    | 3.92659 | 5.61692                                      | 5.61692 |
| Predicted Endpoint (-log C) | 3.28325 | 5.49128                                      | 5.49128 |
| Distance                    | 0.596   | 0.651                                        | 0.651   |
| Reference                   | CPDB    | CPDB                                         | CPDB    |

## Model Applicability

Unknown features are fingerprint features in the query molecule, but not found or appearing too infrequently in the training set.

1. All properties and OPS components are within expected ranges.

## Feature Contribution

| Top features for positive contribution |            |                   |       |
|----------------------------------------|------------|-------------------|-------|
| Fingerprint                            | Bit/Smiles | Feature Structure | Score |
| FCFP_6                                 | 32         | <br>[*]Cl         | 0.154 |

|                                        |            |                                                                                                                                                |        |
|----------------------------------------|------------|------------------------------------------------------------------------------------------------------------------------------------------------|--------|
| FCFP_6                                 | 307419094  | 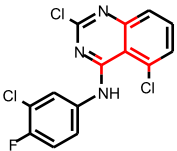<br><chem>[*][c](:[*]):[c](:[cH] :[*]):[c](:[*]):[*]</chem> | 0.121  |
| FCFP_6                                 | 3          | <br><chem>[*]N[*]</chem>                                    | 0.064  |
| Top Features for negative contribution |            |                                                                                                                                                |        |
| Fingerprint                            | Bit/Smiles | Feature Structure                                                                                                                              | Score  |
| FCFP_6                                 | 991735244  | <br><chem>[*]:[c]1:[*]:[cH]:[cH] :[cH]:[cH]:1</chem>        | -0.422 |
| FCFP_6                                 | 16         | <br><chem>[*]:[cH]:[*]</chem>                             | -0.354 |
| FCFP_6                                 | 590925877  | <br><chem>[*]N[c](:[cH]:[*]):[c H]:[*]</chem>             | -0.323 |

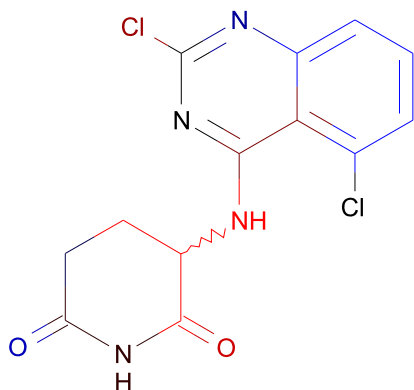
 $C_{13}H_{10}Cl_2N_4O_2$ 

Molecular Weight: 325.15009

ALogP: 2.49

Rotatable Bonds: 2

Acceptors: 5

Donors: 2

## Model Prediction

Prediction: 0.679

Unit: mg/kg\_body\_weight/day

Mahalanobis Distance: 15.3

Mahalanobis Distance p-value: 4.62e-012

Mahalanobis Distance: The Mahalanobis distance (MD) is a generalization of the Euclidean distance that accounts for correlations among the X properties. It is calculated as the distance to the center of the training data. The larger the MD, the less trustworthy the prediction.

Mahalanobis Distance p-value: The p-value gives the fraction of training data with an MD greater than or equal to the one for the given sample, assuming normally distributed data. The smaller the p-value, the less trustworthy the prediction. For highly non-normal X properties (e.g., fingerprints), the MD p-value is wildly inaccurate.

## Structural Similar Compounds

| Name                        | 1,2-Dihydro-2-(5-nitro-2-thienyl)quinazolin-4(3H)-one | 44      | Chrysazin |
|-----------------------------|-------------------------------------------------------|---------|-----------|
| Structure                   |                                                       |         |           |
| Actual Endpoint (-log C)    | 5.25509                                               | 2.85045 | 2.99143   |
| Predicted Endpoint (-log C) | 3.89291                                               | 2.7768  | 3.29868   |
| Distance                    | 0.593                                                 | 0.616   | 0.627     |
| Reference                   | CPDB                                                  | CPDB    | CPDB      |

## Model Applicability

Unknown features are fingerprint features in the query molecule, but not found or appearing too infrequently in the training set.

- OPS PC18 out of range. Value: 4.9912. Training min, max, SD, explained variance: -4.1023, 4.8669, 1.305, 0.0164.

## Feature Contribution

### Top features for positive contribution

| Fingerprint | Bit/Smiles  | Feature Structure                    | Score |
|-------------|-------------|--------------------------------------|-------|
| FCFP_6      | -1043250487 | <br><chem>[*]CC(N[*])C(=O)[*]</chem> | 1.15  |

|                                        |            |                                                                                                                                        |        |
|----------------------------------------|------------|----------------------------------------------------------------------------------------------------------------------------------------|--------|
| FCFP_6                                 | 1          | 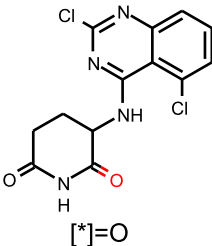<br><chem>[*]=O</chem>                              | 0.234  |
| FCFP_6                                 | -885550502 | <br><chem>[*]C(=[*])NC(=[*])[*]</chem>              | 0.229  |
| Top Features for negative contribution |            |                                                                                                                                        |        |
| Fingerprint                            | Bit/Smiles | Feature Structure                                                                                                                      | Score  |
| FCFP_6                                 | 991735244  | <br><chem>[*]:[c]1:[*]:[cH]:[cH]:[cH]:[cH]:1</chem> | -0.422 |
| FCFP_6                                 | 16         | <br><chem>[*]:[cH]:[*]</chem>                      | -0.354 |
| FCFP_6                                 | 566058135  | <br><chem>[*]CC(=O)N[*]</chem>                    | -0.182 |

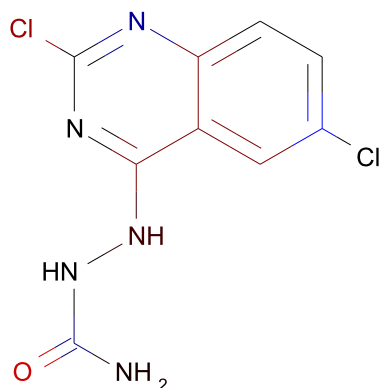

$C_9H_7Cl_2N_5O$

Molecular Weight: 272.09078

ALogP: 2.379

Rotatable Bonds: 2

Acceptors: 4

Donors: 3

## Model Prediction

Prediction: 11.2

Unit: mg/kg\_body\_weight/day

Mahalanobis Distance: 13.3

Mahalanobis Distance p-value: 8.94e-007

Mahalanobis Distance: The Mahalanobis distance (MD) is a generalization of the Euclidean distance that accounts for correlations among the X properties. It is calculated as the distance to the center of the training data. The larger the MD, the less trustworthy the prediction.

Mahalanobis Distance p-value: The p-value gives the fraction of training data with an MD greater than or equal to the one for the given sample, assuming normally distributed data. The smaller the p-value, the less trustworthy the prediction. For highly non-normal X properties (e.g., fingerprints), the MD p-value is wildly inaccurate.

## Structural Similar Compounds

| Name                        | 215     | 2-Hydrazino-4-(p-aminophenyl) thi-azole | Dapsone |
|-----------------------------|---------|-----------------------------------------|---------|
| Structure                   |         |                                         |         |
| Actual Endpoint (-log C)    | 2.84742 | 5.30159                                 | 4.04473 |
| Predicted Endpoint (-log C) | 3.32496 | 4.70335                                 | 4.05717 |
| Distance                    | 0.598   | 0.615                                   | 0.621   |
| Reference                   | CPDB    | CPDB                                    | CPDB    |

## Model Applicability

Unknown features are fingerprint features in the query molecule, but not found or appearing too infrequently in the training set.

1. All properties and OPS components are within expected ranges.

## Feature Contribution

### Top features for positive contribution

| Fingerprint | Bit/Smiles | Feature Structure | Score |
|-------------|------------|-------------------|-------|
| FCFP_6      | 1          | <p>[*]=O</p>      | 0.234 |

|                                        |            |                                                                                                                                      |        |
|----------------------------------------|------------|--------------------------------------------------------------------------------------------------------------------------------------|--------|
| FCFP_6                                 | 32         | 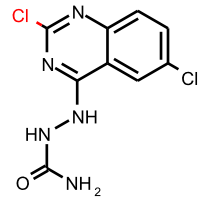<br>[*]Cl                                         | 0.154  |
| FCFP_6                                 | 307419094  | <br>[*][c](:[*]):[c](:[cH<br>]:[*]):[c](:[*]):[*] | 0.121  |
| Top Features for negative contribution |            |                                                                                                                                      |        |
| Fingerprint                            | Bit/Smiles | Feature Structure                                                                                                                    | Score  |
| FCFP_6                                 | 16         | <br>[*]:[cH]:[*]                                  | -0.354 |
| FCFP_6                                 | 17         | <br>[*]:n:[*]                                    | -0.149 |
| FCFP_6                                 | 0          | <br>[*]C                                        | -0.115 |

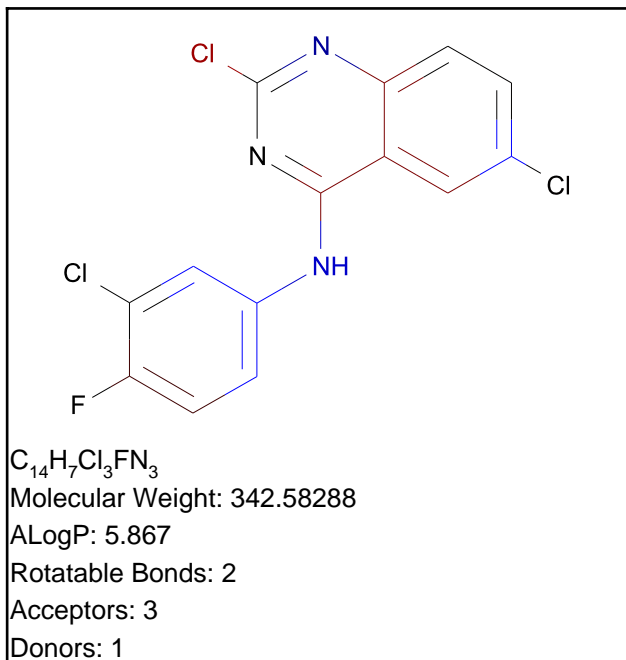

### Model Prediction

Prediction: 6.05

Unit: mg/kg\_body\_weight/day

Mahalanobis Distance: 14.2

Mahalanobis Distance p-value: 4.74e-009

Mahalanobis Distance: The Mahalanobis distance (MD) is a generalization of the Euclidean distance that accounts for correlations among the X properties. It is calculated as the distance to the center of the training data. The larger the MD, the less trustworthy the prediction.

Mahalanobis Distance p-value: The p-value gives the fraction of training data with an MD greater than or equal to the one for the given sample, assuming normally distributed data. The smaller the p-value, the less trustworthy the prediction. For highly non-normal X properties (e.g., fingerprints), the MD p-value is wildly inaccurate.

### Structural Similar Compounds

| Name                        | 45                                                                                  | 357                                                                                 | 4-(4-N-Methyl-N-nitrosamino-styryl)quinoline                                        |
|-----------------------------|-------------------------------------------------------------------------------------|-------------------------------------------------------------------------------------|-------------------------------------------------------------------------------------|
| Structure                   | 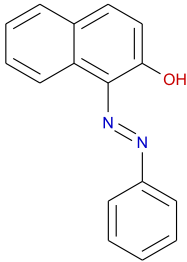 |  |  |
| Actual Endpoint (-log C)    | 3.92659                                                                             | 5.61692                                                                             | 5.61692                                                                             |
| Predicted Endpoint (-log C) | 3.28325                                                                             | 5.49128                                                                             | 5.49128                                                                             |
| Distance                    | 0.603                                                                               | 0.664                                                                               | 0.664                                                                               |
| Reference                   | CPDB                                                                                | CPDB                                                                                | CPDB                                                                                |

### Model Applicability

Unknown features are fingerprint features in the query molecule, but not found or appearing too infrequently in the training set.

1. All properties and OPS components are within expected ranges.

### Feature Contribution

| Top features for positive contribution |            |                                                                                                |       |
|----------------------------------------|------------|------------------------------------------------------------------------------------------------|-------|
| Fingerprint                            | Bit/Smiles | Feature Structure                                                                              | Score |
| FCFP_6                                 | 32         | 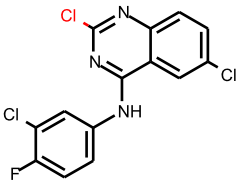<br>[*]Cl | 0.154 |

|                                        |            |                                                                                                                                                 |        |
|----------------------------------------|------------|-------------------------------------------------------------------------------------------------------------------------------------------------|--------|
| FCFP_6                                 | 307419094  | 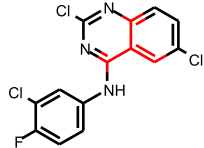<br><chem>[*][c](:[*]):[c](:[cH] ):[*]):[c](:[*]):[*]</chem> | 0.121  |
| FCFP_6                                 | 3          | <br><chem>[*]N[*]</chem>                                     | 0.064  |
| Top Features for negative contribution |            |                                                                                                                                                 |        |
| Fingerprint                            | Bit/Smiles | Feature Structure                                                                                                                               | Score  |
| FCFP_6                                 | 16         | <br><chem>[*]:[cH]:[*]</chem>                                | -0.354 |
| FCFP_6                                 | 590925877  | <br><chem>[*]N[c](:[cH]:[*]):[c H]:[*]</chem>              | -0.323 |
| FCFP_6                                 | 17         | <br><chem>[*]:n:[*]</chem>                                 | -0.149 |

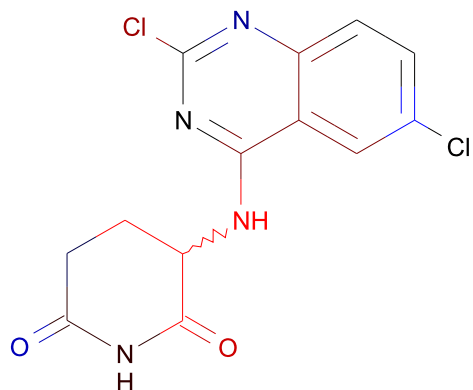

$C_{13}H_{10}Cl_2N_4O_2$

Molecular Weight: 325.15009

ALogP: 2.49

Rotatable Bonds: 2

Acceptors: 5

Donors: 2

## Model Prediction

Prediction: 0.257

Unit: mg/kg\_body\_weight/day

Mahalanobis Distance: 15.1

Mahalanobis Distance p-value: 2.07e-011

Mahalanobis Distance: The Mahalanobis distance (MD) is a generalization of the Euclidean distance that accounts for correlations among the X properties. It is calculated as the distance to the center of the training data. The larger the MD, the less trustworthy the prediction.

Mahalanobis Distance p-value: The p-value gives the fraction of training data with an MD greater than or equal to the one for the given sample, assuming normally distributed data. The smaller the p-value, the less trustworthy the prediction. For highly non-normal X properties (e.g., fingerprints), the MD p-value is wildly inaccurate.

## Structural Similar Compounds

| Name                        | 1,2-Dihydro-2-(5-nitro-2-thi-enyl)quinazolin-4(3H)-one | 44      | 4,4'-Sulfonylbisacetanilide |
|-----------------------------|--------------------------------------------------------|---------|-----------------------------|
| Structure                   |                                                        |         |                             |
| Actual Endpoint (-log C)    | 5.25509                                                | 2.85045 | 3.77655                     |
| Predicted Endpoint (-log C) | 3.89291                                                | 2.7768  | 3.55337                     |
| Distance                    | 0.599                                                  | 0.616   | 0.628                       |
| Reference                   | CPDB                                                   | CPDB    | CPDB                        |

## Model Applicability

Unknown features are fingerprint features in the query molecule, but not found or appearing too infrequently in the training set.

- OPS PC18 out of range. Value: 4.9468. Training min, max, SD, explained variance: -4.1023, 4.8669, 1.305, 0.0164.

## Feature Contribution

### Top features for positive contribution

| Fingerprint | Bit/Smiles  | Feature Structure                    | Score |
|-------------|-------------|--------------------------------------|-------|
| FCFP_6      | -1043250487 | <br><chem>[*]CC(N[*])C(=O)[*]</chem> | 1.15  |

|        |            |                                                                                                              |       |
|--------|------------|--------------------------------------------------------------------------------------------------------------|-------|
| FCFP_6 | 1          | 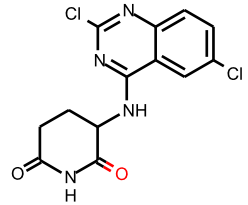<br>[*]=O                 | 0.234 |
| FCFP_6 | -885550502 | <br>[*]C(=[*])NC(=[*])[*] | 0.229 |

### Top Features for negative contribution

| Fingerprint | Bit/Smiles | Feature Structure                                                                                     | Score  |
|-------------|------------|-------------------------------------------------------------------------------------------------------|--------|
| FCFP_6      | 16         | 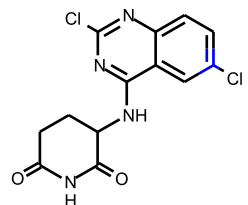<br>[*]:[cH]:[*]   | -0.354 |
| FCFP_6      | 566058135  | <br>[*]CC(=O)N[*] | -0.182 |
| FCFP_6      | 17         | <br>[*]:n:[*]    | -0.149 |

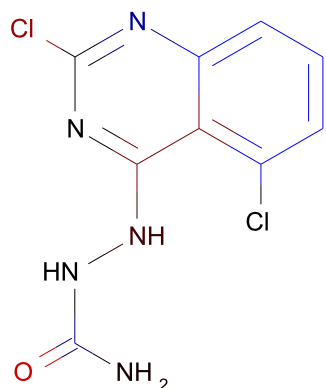

$C_9H_7Cl_2N_5O$

Molecular Weight: 272.09077

ALogP: 2.379

Rotatable Bonds: 2

Acceptors: 4

Donors: 3

## Model Prediction

Prediction: 29.6

Unit: mg/kg\_body\_weight/day

Mahalanobis Distance: 13.6

Mahalanobis Distance p-value: 2.08e-007

Mahalanobis Distance: The Mahalanobis distance (MD) is a generalization of the Euclidean distance that accounts for correlations among the X properties. It is calculated as the distance to the center of the training data. The larger the MD, the less trustworthy the prediction.

Mahalanobis Distance p-value: The p-value gives the fraction of training data with an MD greater than or equal to the one for the given sample, assuming normally distributed data. The smaller the p-value, the less trustworthy the prediction. For highly non-normal X properties (e.g., fingerprints), the MD p-value is wildly inaccurate.

## Structural Similar Compounds

| Name                        | 215     | Purpurin | 2-Hydrazino-4-(p-aminophenyl) thi-azole |
|-----------------------------|---------|----------|-----------------------------------------|
| Structure                   |         |          |                                         |
| Actual Endpoint (-log C)    | 2.84742 | 2.57737  | 5.30159                                 |
| Predicted Endpoint (-log C) | 3.32496 | 3.49183  | 4.70335                                 |
| Distance                    | 0.590   | 0.613    | 0.615                                   |
| Reference                   | CPDB    | CPDB     | CPDB                                    |

## Model Applicability

Unknown features are fingerprint features in the query molecule, but not found or appearing too infrequently in the training set.

1. All properties and OPS components are within expected ranges.

## Feature Contribution

| Top features for positive contribution |            |                   |       |
|----------------------------------------|------------|-------------------|-------|
| Fingerprint                            | Bit/Smiles | Feature Structure | Score |
| FCFP_6                                 | 1          | <br>[*]=O         | 0.234 |

|                                        |            |                                                                                                                                               |        |
|----------------------------------------|------------|-----------------------------------------------------------------------------------------------------------------------------------------------|--------|
| FCFP_6                                 | 32         | 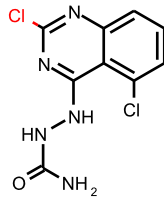<br><chem>[*]Cl</chem>                                     | 0.154  |
| FCFP_6                                 | 307419094  | <br><chem>[*][c](:[*]):[c](:[cH]:[*]):[c](:[*]):[*]</chem> | 0.121  |
| Top Features for negative contribution |            |                                                                                                                                               |        |
| Fingerprint                            | Bit/Smiles | Feature Structure                                                                                                                             | Score  |
| FCFP_6                                 | 991735244  | <br><chem>[*]:[c]1:[*]:[cH]:[cH]:[cH]:[cH]:1</chem>        | -0.422 |
| FCFP_6                                 | 16         | <br><chem>[*]:[cH]:[*]</chem>                             | -0.354 |
| FCFP_6                                 | 17         | <br><chem>[*]:n:[*]</chem>                               | -0.149 |

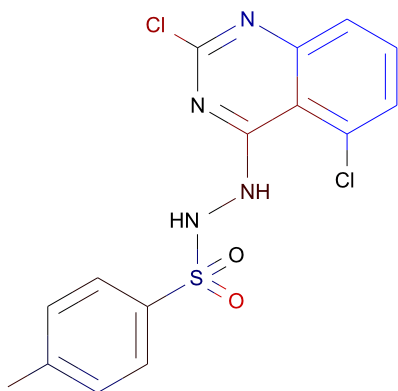

$C_{15}H_{12}Cl_2N_4O_2S$

Molecular Weight: 383.25237

ALogP: 4.443

Rotatable Bonds: 4

Acceptors: 5

Donors: 2

## Model Prediction

Prediction: 10.2

Unit: mg/kg\_body\_weight/day

Mahalanobis Distance: 14

Mahalanobis Distance p-value: 1.55e-008

Mahalanobis Distance: The Mahalanobis distance (MD) is a generalization of the Euclidean distance that accounts for correlations among the X properties. It is calculated as the distance to the center of the training data. The larger the MD, the less trustworthy the prediction.

Mahalanobis Distance p-value: The p-value gives the fraction of training data with an MD greater than or equal to the one for the given sample, assuming normally distributed data. The smaller the p-value, the less trustworthy the prediction. For highly non-normal X properties (e.g., fingerprints), the MD p-value is wildly inaccurate.

## Structural Similar Compounds

| Name                        | Indomethacin | 646     | Omeprazole |
|-----------------------------|--------------|---------|------------|
| Structure                   |              |         |            |
| Actual Endpoint (-log C)    | 5.49293      | 2.41938 | 3.4628     |
| Predicted Endpoint (-log C) | 4.9569       | 3.77987 | 4.7324     |
| Distance                    | 0.568        | 0.603   | 0.609      |
| Reference                   | CPDB         | CPDB    | CPDB       |

## Model Applicability

Unknown features are fingerprint features in the query molecule, but not found or appearing too infrequently in the training set.

1. All properties and OPS components are within expected ranges.

## Feature Contribution

### Top features for positive contribution

| Fingerprint | Bit/Smiles | Feature Structure | Score |
|-------------|------------|-------------------|-------|
| FCFP_6      | 1          |                   | 0.234 |

|                                        |            |                                                                                                                                    |        |
|----------------------------------------|------------|------------------------------------------------------------------------------------------------------------------------------------|--------|
| FCFP_6                                 | 32         | 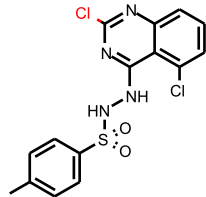<br>[*]Cl                                       | 0.154  |
| FCFP_6                                 | 203677720  | <br>[*]S(=[*])(=[*])[c](:<br>[cH]:[*]):[cH]:[*] | 0.137  |
| Top Features for negative contribution |            |                                                                                                                                    |        |
| Fingerprint                            | Bit/Smiles | Feature Structure                                                                                                                  | Score  |
| FCFP_6                                 | 991735244  | <br>[*]:[c]1:[*]:[cH]:[cH]<br>]:[cH]:[cH]:1     | -0.422 |
| FCFP_6                                 | 16         | <br>[*]:[cH]:[*]                               | -0.354 |
| FCFP_6                                 | 17         | <br>[*]:n:[*]                                 | -0.149 |

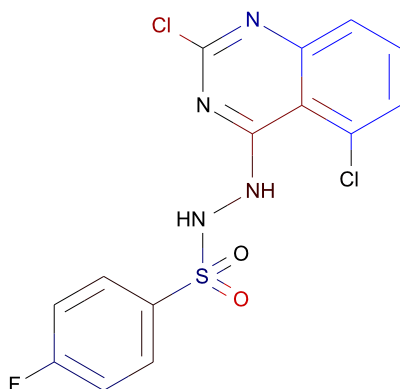

$C_{14}H_9Cl_2FN_4O_2S$

Molecular Weight: 387.21626

ALogP: 4.162

Rotatable Bonds: 4

Acceptors: 5

Donors: 2

## Model Prediction

Prediction: 12.2

Unit: mg/kg\_body\_weight/day

Mahalanobis Distance: 13.5

Mahalanobis Distance p-value: 2.98e-007

Mahalanobis Distance: The Mahalanobis distance (MD) is a generalization of the Euclidean distance that accounts for correlations among the X properties. It is calculated as the distance to the center of the training data. The larger the MD, the less trustworthy the prediction.

Mahalanobis Distance p-value: The p-value gives the fraction of training data with an MD greater than or equal to the one for the given sample, assuming normally distributed data. The smaller the p-value, the less trustworthy the prediction. For highly non-normal X properties (e.g., fingerprints), the MD p-value is wildly inaccurate.

## Structural Similar Compounds

| Name                        | Indomethacin | Omeprazole | 646     |
|-----------------------------|--------------|------------|---------|
| Structure                   |              |            |         |
| Actual Endpoint (-log C)    | 5.49293      | 3.4628     | 2.41938 |
| Predicted Endpoint (-log C) | 4.9569       | 4.7324     | 3.77987 |
| Distance                    | 0.554        | 0.605      | 0.623   |
| Reference                   | CPDB         | CPDB       | CPDB    |

## Model Applicability

Unknown features are fingerprint features in the query molecule, but not found or appearing too infrequently in the training set.

1. All properties and OPS components are within expected ranges.

## Feature Contribution

### Top features for positive contribution

| Fingerprint | Bit/Smiles | Feature Structure | Score |
|-------------|------------|-------------------|-------|
| FCFP_6      | 1          | <br>[*]=O         | 0.234 |

|                                        |            |                                                                                                                                   |        |
|----------------------------------------|------------|-----------------------------------------------------------------------------------------------------------------------------------|--------|
| FCFP_6                                 | 32         | 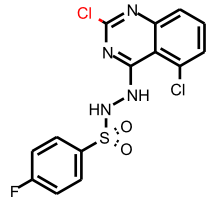<br>[*]Cl                                      | 0.154  |
| FCFP_6                                 | 203677720  | <br>[*]S(=[*])(=[*])[c](<br>[cH]:[*]):[cH]:[*] | 0.137  |
| Top Features for negative contribution |            |                                                                                                                                   |        |
| Fingerprint                            | Bit/Smiles | Feature Structure                                                                                                                 | Score  |
| FCFP_6                                 | 991735244  | <br>[*]:[c]1:[*]:[cH]:[cH]<br>]:[cH]:[cH]:1    | -0.422 |
| FCFP_6                                 | 16         | <br>[*]:[cH]:[*]                              | -0.354 |
| FCFP_6                                 | 17         | <br>[*]:n:[*]                                | -0.149 |

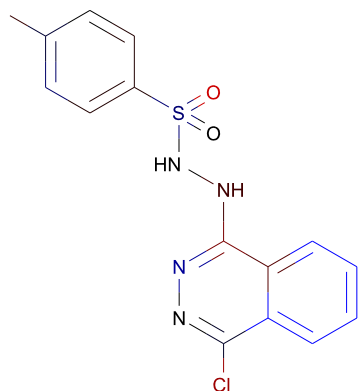

$C_{15}H_{13}ClN_4O_2S$

Molecular Weight: 348.80731

ALogP: 3.529

Rotatable Bonds: 4

Acceptors: 5

Donors: 2

## Model Prediction

Prediction: 12.7

Unit: mg/kg\_body\_weight/day

Mahalanobis Distance: 11.9

Mahalanobis Distance p-value: 0.000885

Mahalanobis Distance: The Mahalanobis distance (MD) is a generalization of the Euclidean distance that accounts for correlations among the X properties. It is calculated as the distance to the center of the training data. The larger the MD, the less trustworthy the prediction.

Mahalanobis Distance p-value: The p-value gives the fraction of training data with an MD greater than or equal to the one for the given sample, assuming normally distributed data. The smaller the p-value, the less trustworthy the prediction. For highly non-normal X properties (e.g., fingerprints), the MD p-value is wildly inaccurate.

## Structural Similar Compounds

| Name                        | Omeprazole | Indomethacin | 796     |
|-----------------------------|------------|--------------|---------|
| Structure                   |            |              |         |
| Actual Endpoint (-log C)    | 3.4628     | 5.49293      | 2.71505 |
| Predicted Endpoint (-log C) | 4.7324     | 4.9569       | 4.45918 |
| Distance                    | 0.592      | 0.595        | 0.603   |
| Reference                   | CPDB       | CPDB         | CPDB    |

## Model Applicability

Unknown features are fingerprint features in the query molecule, but not found or appearing too infrequently in the training set.

1. All properties and OPS components are within expected ranges.

## Feature Contribution

### Top features for positive contribution

| Fingerprint | Bit/Smiles | Feature Structure | Score |
|-------------|------------|-------------------|-------|
| FCFP_6      | 1          | <p>[*]=O</p>      | 0.234 |

|                                        |            |                                                                                                                                             |        |
|----------------------------------------|------------|---------------------------------------------------------------------------------------------------------------------------------------------|--------|
| FCFP_6                                 | 32         | 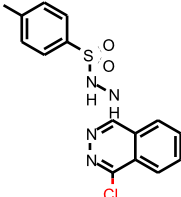<br><chem>[*]Cl</chem>                                   | 0.154  |
| FCFP_6                                 | 203677720  | <br><chem>[*]S(=[*])(=[*])[c](:[cH]:[*]):[cH]:[*]</chem> | 0.137  |
| Top Features for negative contribution |            |                                                                                                                                             |        |
| Fingerprint                            | Bit/Smiles | Feature Structure                                                                                                                           | Score  |
| FCFP_6                                 | 991735244  | <br><chem>[*]:[c]1:[*]:[cH]:[cH]:[cH]:[cH]:1</chem>      | -0.422 |
| FCFP_6                                 | 16         | <br><chem>[*]:[cH]:[*]</chem>                           | -0.354 |
| FCFP_6                                 | 17         | <br><chem>[*]:n:[*]</chem>                             | -0.149 |

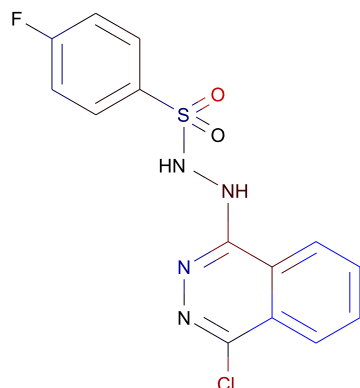

$C_{14}H_{10}ClFN_4O_2S$

Molecular Weight: 352.7712

ALogP: 3.248

Rotatable Bonds: 4

Acceptors: 5

Donors: 2

## Model Prediction

Prediction: 15.2

Unit: mg/kg\_body\_weight/day

Mahalanobis Distance: 11.1

Mahalanobis Distance p-value: 0.0125

Mahalanobis Distance: The Mahalanobis distance (MD) is a generalization of the Euclidean distance that accounts for correlations among the X properties. It is calculated as the distance to the center of the training data. The larger the MD, the less trustworthy the prediction.

Mahalanobis Distance p-value: The p-value gives the fraction of training data with an MD greater than or equal to the one for the given sample, assuming normally distributed data. The smaller the p-value, the less trustworthy the prediction. For highly non-normal X properties (e.g., fingerprints), the MD p-value is wildly inaccurate.

## Structural Similar Compounds

| Name                        | Indomethacin | Omeprazole | 796     |
|-----------------------------|--------------|------------|---------|
| Structure                   |              |            |         |
| Actual Endpoint (-log C)    | 5.49293      | 3.4628     | 2.71505 |
| Predicted Endpoint (-log C) | 4.9569       | 4.7324     | 4.45918 |
| Distance                    | 0.576        | 0.593      | 0.593   |
| Reference                   | CPDB         | CPDB       | CPDB    |

## Model Applicability

Unknown features are fingerprint features in the query molecule, but not found or appearing too infrequently in the training set.

1. All properties and OPS components are within expected ranges.

## Feature Contribution

### Top features for positive contribution

| Fingerprint | Bit/Smiles | Feature Structure | Score |
|-------------|------------|-------------------|-------|
| FCFP_6      | 1          | <p>[*]=O</p>      | 0.234 |

|                                        |            |                                                                                                                                             |        |
|----------------------------------------|------------|---------------------------------------------------------------------------------------------------------------------------------------------|--------|
| FCFP_6                                 | 32         | 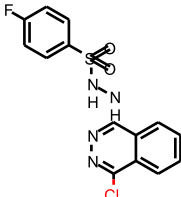<br><chem>[*]Cl</chem>                                   | 0.154  |
| FCFP_6                                 | 203677720  | <br><chem>[*]S(=[*])(=[*])[c](:[cH]:[*]):[cH]:[*]</chem> | 0.137  |
| Top Features for negative contribution |            |                                                                                                                                             |        |
| Fingerprint                            | Bit/Smiles | Feature Structure                                                                                                                           | Score  |
| FCFP_6                                 | 991735244  | <br><chem>[*]:[c]1:[*]:[cH]:[cH]:[cH]:[cH]:1</chem>      | -0.422 |
| FCFP_6                                 | 16         | <br><chem>[*]:[cH]:[*]</chem>                           | -0.354 |
| FCFP_6                                 | 17         | <br><chem>[*]:n:[*]</chem>                             | -0.149 |

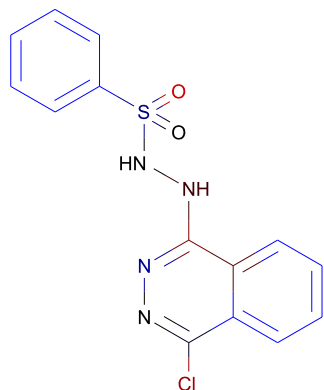

$C_{14}H_{11}ClN_4O_2S$

Molecular Weight: 334.78073

ALogP: 3.043

Rotatable Bonds: 4

Acceptors: 5

Donors: 2

## Model Prediction

Prediction: 38.1

Unit: mg/kg\_body\_weight/day

Mahalanobis Distance: 14

Mahalanobis Distance p-value: 2.75e-008

Mahalanobis Distance: The Mahalanobis distance (MD) is a generalization of the Euclidean distance that accounts for correlations among the X properties. It is calculated as the distance to the center of the training data. The larger the MD, the less trustworthy the prediction.

Mahalanobis Distance p-value: The p-value gives the fraction of training data with an MD greater than or equal to the one for the given sample, assuming normally distributed data. The smaller the p-value, the less trustworthy the prediction. For highly non-normal X properties (e.g., fingerprints), the MD p-value is wildly inaccurate.

## Structural Similar Compounds

| Name                        | 796     | Omeprazole | Bemitradine |
|-----------------------------|---------|------------|-------------|
| Structure                   |         |            |             |
| Actual Endpoint (-log C)    | 2.71505 | 3.4628     | 2.71351     |
| Predicted Endpoint (-log C) | 4.45918 | 4.7324     | 4.65043     |
| Distance                    | 0.566   | 0.594      | 0.599       |
| Reference                   | CPDB    | CPDB       | CPDB        |

## Model Applicability

Unknown features are fingerprint features in the query molecule, but not found or appearing too infrequently in the training set.

1. OPS PC11 out of range. Value: 5.1391. Training min, max, SD, explained variance: -5.9328, 4.6461, 1.629, 0.0255.

## Feature Contribution

### Top features for positive contribution

| Fingerprint | Bit/Smiles | Feature Structure | Score |
|-------------|------------|-------------------|-------|
| FCFP_6      | 1          | <br>[*]=O         | 0.234 |

|                                        |             |                                                                                                                                             |        |
|----------------------------------------|-------------|---------------------------------------------------------------------------------------------------------------------------------------------|--------|
| FCFP_6                                 | 32          | 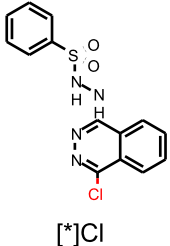<br><chem>[*]Cl</chem>                                   | 0.154  |
| FCFP_6                                 | 203677720   | <br><chem>[*]S(=[*])(=[*])[c](:[cH]:[*]):[cH]:[*]</chem> | 0.137  |
| Top Features for negative contribution |             |                                                                                                                                             |        |
| Fingerprint                            | Bit/Smiles  | Feature Structure                                                                                                                           | Score  |
| FCFP_6                                 | 991735244   | <br><chem>[*]:[c]1:[*]:[cH]:[cH]:[cH]:[cH]:1</chem>      | -0.422 |
| FCFP_6                                 | -2093839777 | <br><chem>[*][c]1:[cH]:[cH]:[cH]:[cH]:[cH]:1</chem>    | -0.378 |
| FCFP_6                                 | 16          | <br><chem>[*]:[cH]:[*]</chem>                          | -0.354 |
